# Supplementary material for: Single-cell RNA-seq of heart reveals intercellular communication drivers of myocardial fibrosis in diabetic cardiomyopathy
Source: eLife. 2023 Apr 3;12:e80479. doi: 10.7554/eLife.80479 (PMC10110238; doi:10.7554/eLife.80479)
Supplement: Figure 3—figure supplement 5—source data 1. [file elife-80479-fig3-figsupp5-data1.xlsx]

## Sheet: Sheet1
Table 1 ECG assessment of heart function in mice
Mesearments		Con (n=15)				DB (n=15)				DB+Ima (n=15)
IVSd (mm)		1.17±0.06				1.01±0.12 NS				0.87±0.10 NS
IVSs (mm)		1.24±0.12				0.96±0.03 **				1.13±0.10 *
LVIDd (mm)		2.68±0.16				2.84±1.00 NS				3.31±0.39 NS
LVIDs (mm)		1.15±0.22				1.61±0.64 NS				1.67±0.24 NS
EF (%)		84.72±3.23				71.61±3.81 ***				82.20±2.77 **
FS (%)		52.07±3.79				41.20±5.71 **				46.90±2.73 *
LV mass (mg)		82.47±5.47				54.50±8.80 **				75.87±5.30 *
E/A		1.84±0.27				1.36±0.19 **				1.72±0.31 **
