# Supplementary material for: Single-cell RNA-seq of heart reveals intercellular communication drivers of myocardial fibrosis in diabetic cardiomyopathy
Source: eLife. 2023 Apr 3;12:e80479. doi: 10.7554/eLife.80479 (PMC10110238; doi:10.7554/eLife.80479)
Supplement: Figure 3—source data 1. [file elife-80479-fig3-data1.xlsx]

## Sheet: 2020.9.22 
Experiment: collagen I Selected Filter: SYBR Green I / HRM Dye (465-510)
Include	Color	Pos	Name	Cp	Concentration	Standard	Status					35.72	29.72				33.45	27.98			39.65	33.84
TRUE	255	A1	Sample 1	35.72		0		Con1-Col1a1	Experiment			35.68	29.74				33.37	27.94			39.47	33.84
TRUE	255	A2	Sample 2	35.68		0		Con1-Col1a1				35.7	29.8				33.44	28.02			39.5	33.75
TRUE	255	A3	Sample 3	35.7		0		Con1-Col1a1				35.7	29.7533				33.42	27.98			39.54	33.81
TRUE	255	A4	Sample 4	29.72		0		Con1-GAPDH				38.9	32.75				29.76	24.25			32.91	26.95
TRUE	255	A5	Sample 5	29.74		0		Con1-GAPDH				38.78	32.81				29.58	24.39			32.78	26.83
TRUE	255	A6	Sample 6	29.8		0		Con1-GAPDH				38.82	32.78				29.63	24.2			32.73	26.81
TRUE	255	A7	Sample 7	38.9		0		Con2-Col1a1				38.8333	32.78				29.6567	24.28			32.8067	26.8633
TRUE	255	A8	Sample 8	38.78		0		Con2-Col1a1				35.77	29.65				37.67	32.74			29.42	23.23
TRUE	255	A9	Sample 9	38.82		0		Con2-Col1a1				35.64	29.51				37.88	32.81			29.54	23.29
TRUE	255	A10	Sample 10	32.75		0		Con2-GAPDH				35.71	29.6				37.7	32.65			29.39	23.13
TRUE	255	A11	Sample 11	32.81		0		Con2-GAPDH				35.7067	29.5867				37.75	32.7333			29.45	23.2167
TRUE	255	A12	Sample 12	32.78		0		Con2-GAPDH				32.98	27.09				30.32	25.01			37.88	32.33
TRUE	255	B1	Sample 25	35.77		0		Con3-Col1a1				32.87	27.07				30.45	24.9			37.7	32.16
TRUE	255	B2	Sample 26	35.64		0		Con3-Col1a1				32.95	27.02				30.5	24.89			37.73	32.19
TRUE	255	B3	Sample 27	35.71		0		Con3-Col1a1				32.9333	27.06				30.4233	24.9333			37.77	32.2267
TRUE	255	B4	Sample 28	29.65		0		Con3-GAPDH				41.25	35.44				42.44	37.36			40.38	34.45
TRUE	255	B5	Sample 29	29.51		0		Con3-GAPDH				41.27	35.58				42.38	37.31			40.21	34.51
TRUE	255	B6	Sample 30	29.6		0		Con3-GAPDH				42.32	35.5				42.51	37.21			40.3	34.28
TRUE	255	B7	Sample 31	32.98		0		Con4-Col1a1				41.6133	35.5067				42.4433	37.2933			40.2967	34.4133
TRUE	255	B8	Sample 32	32.87		0		Con4-Col1a1				37.54	31.11				29.39	24.32			38.77	32.52
TRUE	255	B9	Sample 33	32.95		0		Con4-Col1a1				37.46	31.02				29.51	24.15			38.6	32.66
TRUE	255	B10	Sample 34	27.09		0		Con4-GAPDH				37.5	31.16				29.42	24.18			38.69	32.65
TRUE	255	B11	Sample 35	27.07		0		Con4-GAPDH				37.5	31.0967				29.44	24.2167			38.6867	32.61
TRUE	255	B12	Sample 36	27.02		0		Con4-GAPDH
TRUE	255	C1	Sample 49	41.25		0		Con5-Col1a1
TRUE	255	C2	Sample 50	41.27		0		Con5-Col1a1				35.7	29.75	5.95			33.42	27.98	5.44		39.54	33.81	5.73
TRUE	255	C3	Sample 51	42.32		0		Con5-Col1a1				38.83	32.78	6.05			29.66	24.28	5.38		32.81	26.861	5.949
TRUE	255	C4	Sample 52	35.44		0		Con5-GAPDH				35.71	29.59	6.12			37.75	32.736	5.014		29.45	23.22	6.23
TRUE	255	C5	Sample 53	35.58		0		Con5-GAPDH				32.93	27.06	5.87			30.426	24.936	5.49		37.77	32.23	5.54
TRUE	255	C6	Sample 54	35.5		0		Con5-GAPDH				41.61	35.51	6.1			42.446	37.296	5.15		40.3	34.41	5.89
TRUE	255	C7	Sample 55	37.54		0		Con6-Col1a1				37.5	31.1	6.4			29.44	24.22	5.22		38.69	32.61	6.08
TRUE	255	C8	Sample 56	37.46		0		Con6-Col1a1
TRUE	255	C9	Sample 57	37.5		0		Con6-Col1a1
TRUE	255	C10	Sample 58	31.11		0		Con6-GAPDH											31.45	30.01
TRUE	255	C11	Sample 59	31.02		0		Con6-GAPDH				ΔCT	5.95	5.44	5.73				31.33	30.11
TRUE	255	C12	Sample 60	31.16		0		Con6-GAPDH					6.05	5.38	5.949				31.49	29.86
TRUE	255	D1	Sample 73	33.45		0		DB1-Col1a1					6.12	5.014	6.23				31.4233	29.9933	1.43
TRUE	255	D2	Sample 74	33.37		0		DB1-Col1a1					5.87	5.49	5.54
TRUE	255	D3	Sample 75	33.44		0		DB1-Col1a1					6.1	5.15	5.89
TRUE	255	D4	Sample 76	27.98		0		DB1-GAPDH					6.4	5.22	6.08
TRUE	255	D5	Sample 77	27.94		0		DB1-GAPDH
TRUE	255	D6	Sample 78	28.02		0		DB1-GAPDH				ΔΔCT	4.52	4.01	4.3
TRUE	255	D7	Sample 79	29.76		0		DB2-Col1a1					4.62	3.95	4.519
TRUE	255	D8	Sample 80	29.58		0		DB2-Col1a1					4.69	3.584	4.8
TRUE	255	D9	Sample 81	29.63		0		DB2-Col1a1					4.44	4.06	4.11
TRUE	255	D10	Sample 82	24.25		0		DB2-GAPDH					4.67	3.72	4.46
TRUE	255	D11	Sample 83	24.39		0		DB2-GAPDH					4.97	3.79	4.65
TRUE	255	D12	Sample 84	24.2		0		DB2-GAPDH
TRUE	255	E1	Sample 97	37.67		0		DB3-Col1a1				2–ΔΔCT	0.0435857	0.0620683	0.0507658
TRUE	255	E2	Sample 98	37.88		0		DB3-Col1a1					0.0406669	0.0647041	0.043616
TRUE	255	E3	Sample 99	37.7		0		DB3-Col1a1					0.0387409	0.0833889	0.0358968
TRUE	255	E4	Sample 100	32.74		0		DB3-GAPDH					0.0460709	0.059954	0.0579118
TRUE	255	E5	Sample 101	32.81		0		DB3-GAPDH					0.0392817	0.0758872	0.0454366
TRUE	255	E6	Sample 102	32.65		0		DB3-GAPDH					0.0319066	0.072293	0.03983
TRUE	255	E7	Sample 103	30.32		0		DB4-Col1a1					0.0400421
TRUE	255	E8	Sample 104	30.45		0		DB4-Col1a1
TRUE	255	E9	Sample 105	30.5		0		DB4-Col1a1				Relative(100%)	1.0885	1.55007	1.26781
TRUE	255	E10	Sample 106	25.01		0		DB4-GAPDH					1.0156	1.6159	1.08925
TRUE	255	E11	Sample 107	24.9		0		DB4-GAPDH					0.967503	2.08253	0.896476
TRUE	255	E12	Sample 108	24.89		0		DB4-GAPDH					1.15056	1.49727	1.44627
TRUE	255	F1	Sample 121	42.44		0		DB5-Col1a1					0.981009	1.89518	1.13472
TRUE	255	F2	Sample 122	42.38		0		DB5-Col1a1					0.796827	1.80542	0.994703
TRUE	255	F3	Sample 123	42.51		0		DB5-Col1a1
TRUE	255	F4	Sample 124	37.36		0		DB5-GAPDH
TRUE	255	F5	Sample 125	37.31		0		DB5-GAPDH
TRUE	255	F6	Sample 126	37.21		0		DB5-GAPDH
TRUE	255	F7	Sample 127	29.39		0		DB6-Col1a1
TRUE	255	F8	Sample 128	29.51		0		DB6-Col1a1
TRUE	255	F9	Sample 129	29.42		0		DB6-Col1a1
TRUE	255	F10	Sample 130	24.32		0		DB6-GAPDH
TRUE	255	F11	Sample 131	24.15		0		DB6-GAPDH
TRUE	255	F12	Sample 132	24.18		0		DB6-GAPDH
TRUE	255	G1	Sample 145	39.65		0		DB1+Ima-Col1a1
TRUE	255	G2	Sample 146	39.47		0		DB1+Ima-Col1a1
TRUE	255	G3	Sample 147	39.5		0		DB1+Ima-Col1a1
TRUE	255	G4	Sample 148	33.84		0		DB1+Ima-GAPDH
TRUE	255	G5	Sample 149	33.84		0		DB1+Ima-GAPDH
TRUE	255	G6	Sample 150	33.75		0		DB1+Ima-GAPDH
TRUE	255	G7	Sample 151	32.91		0		DB2+Ima-Col1a1
TRUE	255	G8	Sample 152	32.78		0		DB2+Ima-Col1a1
TRUE	255	G9	Sample 153	32.73		0		DB2+Ima-Col1a1
TRUE	255	G10	Sample 154	26.95		0		DB2+Ima-GAPDH
TRUE	255	G11	Sample 155	26.83		0		DB2+Ima-GAPDH
TRUE	255	G12	Sample 156	26.81		0		DB2+Ima-GAPDH
TRUE	255	H1	Sample 169	29.42		0		DB3+Ima-Col1a1
TRUE	255	H2	Sample 170	29.54		0		DB3+Ima-Col1a1
TRUE	255	H3	Sample 171	29.39		0		DB3+Ima-Col1a1
TRUE	255	H4	Sample 172	23.23		0		DB3+Ima-GAPDH
TRUE	255	H5	Sample 173	23.29		0		DB3+Ima-GAPDH
TRUE	255	H6	Sample 174	23.13		0		DB3+Ima-GAPDH
TRUE	255	H7	Sample 175	37.88		0		DB4+Ima-Col1a1
TRUE	255	H8	Sample 176	37.7		0		DB4+Ima-Col1a1
TRUE	255	H9	Sample 177	37.73		0		DB4+Ima-Col1a1
TRUE	255	H10	Sample 178	32.33		0		DB4+Ima-GAPDH
TRUE	255	H11	Sample 179	32.16		0		DB4+Ima-GAPDH
TRUE	255	H12	Sample 180	32.19		0		DB4+Ima-GAPDH
TRUE	255	I1	Sample 193	40.38		0		DB5+Ima-Col1a1
TRUE	255	I2	Sample 194	40.21		0		DB5+Ima-Col1a1
TRUE	255	I3	Sample 195	40.3		0		DB5+Ima-Col1a1
TRUE	255	I4	Sample 196	34.45		0		DB5+Ima-GAPDH
TRUE	255	I5	Sample 197	34.51		0		DB5+Ima-GAPDH
TRUE	255	I6	Sample 198	34.28		0		DB5+Ima-GAPDH
TRUE	255	I7	Sample 199	38.77		0		DB6+Ima-Col1a1
TRUE	255	I8	Sample 200	38.6		0		DB6+Ima-Col1a1
TRUE	255	I9	Sample 201	38.69		0		DB6+Ima-Col1a1
TRUE	255	I10	Sample 202	32.52		0		DB6+Ima-GAPDH
TRUE	255	I11	Sample 203	32.66		0		DB6+Ima-GAPDH
TRUE	255	I12	Sample 204	32.65		0		DB6+Ima-GAPDH
TRUE	255	J1	Sample 217	31.45		0		Col1a1	Calibration
TRUE	255	J2	Sample 218	31.33		0		Col1a1
TRUE	255	J3	Sample 219	31.49		0		Col1a1
TRUE	255	J4	Sample 220	30.01		0		GAPDH
TRUE	255	J5	Sample 221	30.11		0		GAPDH
TRUE	255	J6	Sample 222	29.86		0		GAPDH

## Sheet: Sheet1
		35.72	29.72				33.45	27.98			39.65	33.84
		35.68	29.74				33.37	27.94			39.47	33.84
		35.7	29.8				33.44	28.02			39.5	33.75
		35.7	29.7533				33.42	27.98			39.54	33.81
		38.9	32.75				29.76	24.25			32.91	26.95
		38.78	32.81				29.58	24.39			32.78	26.83
		38.82	32.78				29.63	24.2			32.73	26.81
		38.8333	32.78				29.6567	24.28			32.8067	26.8633
		35.77	29.65				37.67	32.74			29.42	23.23
		35.64	29.51				37.88	32.81			29.54	23.29
		35.71	29.6				37.7	32.65			29.39	23.13
		35.7067	29.5867				37.75	32.7333			29.45	23.2167
		32.98	27.09				30.32	25.01			37.88	32.33
		32.87	27.07				30.45	24.9			37.7	32.16
		32.95	27.02				30.5	24.89			37.73	32.19
		32.9333	27.06				30.4233	24.9333			37.77	32.2267
		41.25	35.44				42.44	37.36			40.38	34.45
		41.27	35.58				42.38	37.31			40.21	34.51
		42.32	35.5				42.51	37.21			40.3	34.28
		41.6133	35.5067				42.4433	37.2933			40.2967	34.4133
		37.54	31.11				29.39	24.32			38.77	32.52
		37.46	31.02				29.51	24.15			38.6	32.66
		37.5	31.16				29.42	24.18			38.69	32.65
		37.5	31.0967				29.44	24.2167			38.6867	32.61
