# Supplementary material for: Single-cell RNA-seq of heart reveals intercellular communication drivers of myocardial fibrosis in diabetic cardiomyopathy
Source: eLife. 2023 Apr 3;12:e80479. doi: 10.7554/eLife.80479 (PMC10110238; doi:10.7554/eLife.80479)
Supplement: Figure 3—source data 2. [file elife-80479-fig3-data2.xlsx]

## Sheet: tM
Experiment: Collagen III Selected Filter: SYBR Green I / HRM Dye (465-510)
Include	Color	Pos	Name	Cp	Concentration	Standard	Status
TRUE	255	A1	Sample 1	75.46		0		Con1-Col3a1	Experiment
TRUE	255	A2	Sample 2	75.51		0		Con1-Col3a1
TRUE	255	A3	Sample 3	75.58		0		Con1-Col3a1
TRUE	255	A4	Sample 4	69.59		0		Con1-GAPDH
TRUE	255	A5	Sample 5	69.73		0		Con1-GAPDH
TRUE	255	A6	Sample 6	69.56		0		Con1-GAPDH
TRUE	255	A7	Sample 7	63.57		0		Con2-Col3a1
TRUE	255	A8	Sample 8	63.52		0		Con2-Col3a1
TRUE	255	A9	Sample 9	63.53		0		Con2-Col3a1
TRUE	255	A10	Sample 10	57.56		0		Con2-GAPDH
TRUE	255	A11	Sample 11	57.6		0		Con2-GAPDH
TRUE	255	A12	Sample 12	57.66		0		Con2-GAPDH
TRUE	255	B1	Sample 25	68.45		0		Con3-Col3a1
TRUE	255	B2	Sample 26	68.5		0		Con3-Col3a1
TRUE	255	B3	Sample 27	68.51		0		Con3-Col3a1
TRUE	255	B4	Sample 28	62.75		0		Con3-GAPDH
TRUE	255	B5	Sample 29	62.8		0		Con3-GAPDH
TRUE	255	B6	Sample 30	62.69		0		Con3-GAPDH
TRUE	255	B7	Sample 31	71.51		0		Con4-Col3a1
TRUE	255	B8	Sample 32	71.49		0		Con4-Col3a1
TRUE	255	B9	Sample 33	71.48		0		Con4-Col3a1
TRUE	255	B10	Sample 34	65.73		0		Con4-GAPDH
TRUE	255	B11	Sample 35	65.9		0		Con4-GAPDH
TRUE	255	B12	Sample 36	65.84		0		Con4-GAPDH
TRUE	255	C1	Sample 49	76.69		0		Con5-Col3a1
TRUE	255	C2	Sample 50	76.8		0		Con5-Col3a1
TRUE	255	C3	Sample 51	76.71		0		Con5-Col3a1
TRUE	255	C4	Sample 52	70.83		0		Con5-GAPDH
TRUE	255	C5	Sample 53	70.89		0		Con5-GAPDH
TRUE	255	C6	Sample 54	71.28		0		Con5-GAPDH
TRUE	255	C7	Sample 55	70.3		0		Con6-Col3a1
TRUE	255	C8	Sample 56	76.23		0		Con6-Col3a1
TRUE	255	C9	Sample 57	76.2		0		Con6-Col3a1
TRUE	255	C10	Sample 58	67.95		0		Con6-GAPDH
TRUE	255	C11	Sample 59	67.79		0		Con6-GAPDH
TRUE	255	C12	Sample 60	67.84		0		Con6-GAPDH
TRUE	255	D1	Sample 73	66.59		0		DB1-Col3a1
TRUE	255	D2	Sample 74	66.6		0		DB1-Col3a1
TRUE	255	D3	Sample 75	66.82		0		DB1-Col3a1
TRUE	255	D4	Sample 76	61.5		0		DB1-GAPDH
TRUE	255	D5	Sample 77	61.4		0		DB1-GAPDH
TRUE	255	D6	Sample 78	61.32		0		DB1-GAPDH
TRUE	255	D7	Sample 79	76.7		0		DB2-Col3a1
TRUE	255	D8	Sample 80	76.16		0		DB2-Col3a1
TRUE	255	D9	Sample 81	76.19		0		DB2-Col3a1
TRUE	255	D10	Sample 82	70.78		0		DB2-GAPDH
TRUE	255	D11	Sample 83	70.68		0		DB2-GAPDH
TRUE	255	D12	Sample 84	70.84		0		DB2-GAPDH
TRUE	255	E1	Sample 97	82.34		0		DB3-Col3a1
TRUE	255	E2	Sample 98	82.42		0		DB3-Col3a1
TRUE	255	E3	Sample 99	82.43		0		DB3-Col3a1
TRUE	255	E4	Sample 100	77.63		0		DB3-GAPDH
TRUE	255	E5	Sample 101	77.41		0		DB3-GAPDH
TRUE	255	E6	Sample 102	77.49		0		DB3-GAPDH
TRUE	255	E7	Sample 103	72.29		0		DB4-Col3a1
TRUE	255	E8	Sample 104	72.96		0		DB4-Col3a1
TRUE	255	E9	Sample 105	72.18		0		DB4-Col3a1
TRUE	255	E10	Sample 106	67.51		0		DB4-GAPDH
TRUE	255	E11	Sample 107	67.38		0		DB4-GAPDH
TRUE	255	E12	Sample 108	67.56		0		DB4-GAPDH
TRUE	255	F1	Sample 121	69.32		0		DB5-Col3a1
TRUE	255	F2	Sample 122	69.29		0		DB5-Col3a1
TRUE	255	F3	Sample 123	69.29		0		DB5-Col3a1
TRUE	255	F4	Sample 124	64.07		0		DB5-GAPDH
TRUE	255	F5	Sample 125	64.05		0		DB5-GAPDH
TRUE	255	F6	Sample 126	63.9		0		DB5-GAPDH
TRUE	255	F7	Sample 127	82.38		0		DB6-Col3a1
TRUE	255	F8	Sample 128	82.29		0		DB6-Col3a1				75.52	69.63	5.89	66.67	61.41	5.26	72.47	66.75	5.72
TRUE	255	F9	Sample 129	82.35		0		DB6-Col3a1				63.54	57.61	5.93	76.35	70.77	5.58	81.51	75.26	6.25
TRUE	255	F10	Sample 130	77.45		0		DB6-GAPDH				68.49	62.75	5.74	82.4	77.51	4.89	81.42	75.84	5.58
TRUE	255	F11	Sample 131	77.32		0		DB6-GAPDH				71.49	65.82	5.67	72.48	67.48	5	79.23	73.35	5.88
TRUE	255	F12	Sample 132	77.19		0		DB6-GAPDH				76.73	71	5.73	69.3	64.01	5.29	87.43	81.65	5.78
TRUE	255	G1	Sample 145	72.9		0		DB1+Ima-Col3a1				74.24	67.86	6.38	82.34	77.32	5.02	81.42	76.08	5.34
TRUE	255	G2	Sample 146	72.01		0		DB1+Ima-Col3a1
TRUE	255	G3	Sample 147	72.5		0		DB1+Ima-Col3a1
TRUE	255	G4	Sample 148	66.83		0		DB1+Ima-GAPDH
TRUE	255	G5	Sample 149	66.75		0		DB1+Ima-GAPDH				ΔCT	5.89	5.26	5.72
TRUE	255	G6	Sample 150	66.68		0		DB1+Ima-GAPDH					5.93	5.58	6.25
TRUE	255	G7	Sample 151	81.69		0		DB2+Ima-Col3a1					5.74	4.89	5.58
TRUE	255	G8	Sample 152	81.41		0		DB2+Ima-Col3a1					5.67	5	5.88
TRUE	255	G9	Sample 153	81.42		0		DB2+Ima-Col3a1					5.73	5.29	5.78
TRUE	255	G10	Sample 154	75.25		0		DB2+Ima-GAPDH					6.38	5.02	5.34
TRUE	255	G11	Sample 155	75.16		0		DB2+Ima-GAPDH
TRUE	255	G12	Sample 156	75.37		0		DB2+Ima-GAPDH				ΔΔCT	4.66	4.03	4.49
TRUE	255	H1	Sample 169	81.38		0		DB3+Ima-Col3a1					4.7	4.35	5.02
TRUE	255	H2	Sample 170	81.45		0		DB3+Ima-Col3a1					4.51	3.66	4.35
TRUE	255	H3	Sample 171	81.44		0		DB3+Ima-Col3a1					4.44	3.77	4.65
TRUE	255	H4	Sample 172	75.93		0		DB3+Ima-GAPDH					4.5	4.06	4.55
TRUE	255	H5	Sample 173	75.86		0		DB3+Ima-GAPDH					5.15	3.79	4.11
TRUE	255	H6	Sample 174	75.72		0		DB3+Ima-GAPDH
TRUE	255	H7	Sample 175	79.37		0		DB4+Ima-Col3a1			2–ΔΔCT		0.0395549	0.0612138	0.0445016
TRUE	255	H8	Sample 176	79.29		0		DB4+Ima-Col3a1					0.0384733	0.0490365	0.0308198
TRUE	255	H9	Sample 177	79.04		0		DB4+Ima-Col3a1					0.0438889	0.0791098	0.0490365
TRUE	255	H10	Sample 178	73.36		0		DB4+Ima-GAPDH					0.0460709	0.0733022	0.03983
TRUE	255	H11	Sample 179	73.21		0		DB4+Ima-GAPDH					0.0441942	0.059954	0.0426888
TRUE	255	H12	Sample 180	73.48		0		DB4+Ima-GAPDH					0.0281641	0.072293	0.0579118
TRUE	255	I1	Sample 193	87.35		0		DB5+Ima-Col3a1					0.0400577
TRUE	255	I2	Sample 194	87.52		0		DB5+Ima-Col3a1
TRUE	255	I3	Sample 195	87.43		0		DB5+Ima-Col3a1
TRUE	255	I4	Sample 196	81.73		0		DB5+Ima-GAPDH					0.987448	1.52814	1.11094
TRUE	255	I5	Sample 197	81.45		0		DB5+Ima-GAPDH					0.960446	1.22415	0.769384
TRUE	255	I6	Sample 198	81.76		0		DB5+Ima-GAPDH					1.09564	1.9749	1.22415
TRUE	255	I7	Sample 199	86.48		0		DB6+Ima-Col3a1					1.15011	1.82991	0.994316
TRUE	255	I8	Sample 200	77.67		0		DB6+Ima-Col3a1					1.10326	1.49669	1.06568
TRUE	255	I9	Sample 201	80.11		0		DB6+Ima-Col3a1					0.703088	1.80472	1.44571
TRUE	255	I10	Sample 202	76.05		0		DB6+Ima-GAPDH
TRUE	255	I11	Sample 203	76.2		0		DB6+Ima-GAPDH
TRUE	255	I12	Sample 204	75.99		0		DB6+Ima-GAPDH
TRUE	255	J1	Sample 217	79.66		0		Col3a1	Calibration
TRUE	255	J2	Sample 218	79.35		0		Col3a1
TRUE	255	J3	Sample 219	79.56		0		Col3a1
TRUE	255	J4	Sample 220	78.43		0		GAPDH
TRUE	255	J5	Sample 221	78.12		0		GAPDH
TRUE	255	J6	Sample 222	78.33		0		GAPDH
