# Supplementary material for: Single-cell RNA-seq of heart reveals intercellular communication drivers of myocardial fibrosis in diabetic cardiomyopathy
Source: eLife. 2023 Apr 3;12:e80479. doi: 10.7554/eLife.80479 (PMC10110238; doi:10.7554/eLife.80479)
Supplement: Figure 6—source data 1. [file elife-80479-fig6-data1.xlsx]

## Sheet: tM
Experiment: siItgb1-5 day Selected Filter: SYBR Green I / HRM Dye (465-510)
Include	Color	Pos	Name	Cp	Concentration	Standard	Status					31.97	25.9	6.07		29.71	21.1	8.61
TRUE	255	A1	Sample 1	31.64		0		Con1-Itgb1	Experiment			20.11	13.82	6.29		31.68	23.68	8
TRUE	255	A2	Sample 2	32.87		0		Con1-Itgb1				19.95	13.57	6.38		30.91	21.72	9.19
TRUE	255	A3	Sample 3	31.41		0		Con1-Itgb1				33.19	27.61	5.58		28.9	19.85	9.05
TRUE	255	A4	Sample 4	25.82		0		Con1-GAPDH				20.61	14.34	6.27		20.71	12.84	7.87
TRUE	255	A5	Sample 5	25.89		0		Con1-GAPDH				30.38	24.65	5.73		25.48	17.36	8.12
TRUE	255	A6	Sample 6	25.99		0		Con1-GAPDH
TRUE	255	A7	Sample 7	20.16		0		Con2-Itgb1
TRUE	255	A8	Sample 8	20.07		0		Con2-Itgb1
TRUE	255	A9	Sample 9	20.09		0		Con2-Itgb1
TRUE	255	A10	Sample 10	13.86		0		Con2-GAPDH
TRUE	255	A11	Sample 11	13.72		0		Con2-GAPDH				5d	siControl	siItgb1
TRUE	255	A12	Sample 12	13.88		0		Con2-GAPDH				ΔCT	6.07	8.61
TRUE	255	B1	Sample 25	20.13		0		Con3-Itgb1					6.29	8
TRUE	255	B2	Sample 26	20.12		0		Con3-Itgb1					6.38	9.19
TRUE	255	B3	Sample 27	19.61		0		Con3-Itgb1					5.58	9.05
TRUE	255	B4	Sample 28	13.56		0		Con3-GAPDH					6.27	7.87
TRUE	255	B5	Sample 29	13.46		0		Con3-GAPDH					5.73	8.12
TRUE	255	B6	Sample 30	13.68		0		Con3-GAPDH
TRUE	255	B7	Sample 31	33.1		0		Con4-Itgb1
TRUE	255	B8	Sample 32	34.15		0		Con4-Itgb1				ΔΔCT	4.69	7.23
TRUE	255	B9	Sample 33	32.32		0		Con4-Itgb1					4.91	6.62
TRUE	255	B10	Sample 34	27.71		0		Con4-GAPDH					5	7.81
TRUE	255	B11	Sample 35	27.51		0		Con4-GAPDH					4.2	7.67
TRUE	255	B12	Sample 36	27.6		0		Con4-GAPDH					4.89	6.49
TRUE	255	C1	Sample 49	20.58		0		Con5-Itgb1					4.35	6.74
TRUE	255	C2	Sample 50	20.57		0		Con5-Itgb1
TRUE	255	C3	Sample 51	20.67		0		Con5-Itgb1
TRUE	255	C4	Sample 52	14.42		0		Con5-GAPDH
TRUE	255	C5	Sample 53	14.34		0		Con5-GAPDH				2^-ΔΔCT	0.0387409	0.00666121
TRUE	255	C6	Sample 54	14.25		0		Con5-GAPDH					0.0332616	0.0101667
TRUE	255	C7	Sample 55	30.16		0		Con6-Itgb1					0.03125	0.00445611
TRUE	255	C8	Sample 56	29.7		0		Con6-Itgb1					0.0544094	0.00491021
TRUE	255	C9	Sample 57	31.28		0		Con6-Itgb1					0.0337259	0.0111254
TRUE	255	C10	Sample 58	24.77		0		Con6-GAPDH					0.0490365	0.0093553
TRUE	255	C11	Sample 59	24.53		0		Con6-GAPDH					0.0400707
TRUE	255	C12	Sample 60	24.64		0		Con6-GAPDH
TRUE	255	D1	Sample 73	28.65		0		siItgb1-1
TRUE	255	D2	Sample 74	30.91		0		siItgb1-1				relative(100%)	0.966813	0.166236
TRUE	255	D3	Sample 75	29.57		0		siItgb1-1					0.830072	0.25372
TRUE	255	D4	Sample 76	21.21		0		siItgb1-1-GAPDH					0.779871	0.111206
TRUE	255	D5	Sample 77	20.98		0		siItgb1-1-GAPDH					1.35784	0.122539
TRUE	255	D6	Sample 78	21.11		0		siItgb1-1-GAPDH					0.841659	0.277644
TRUE	255	D7	Sample 79	32.24		0		siItgb1-2					1.22375	0.23347
TRUE	255	D8	Sample 80	32.71		0		siItgb1-2
TRUE	255	D9	Sample 81	30.08		0		siItgb1-2
TRUE	255	D10	Sample 82	23.69		0		siItgb1-2-GAPDH
TRUE	255	D11	Sample 83	23.59		0		siItgb1-2-GAPDH
TRUE	255	D12	Sample 84	23.77		0		siItgb1-2-GAPDH
TRUE	255	E1	Sample 97	30.3		0		siItgb1-3
TRUE	255	E2	Sample 98	32		0		siItgb1-3
TRUE	255	E3	Sample 99	30.44		0		siItgb1-3
TRUE	255	E4	Sample 100	21.73		0		siItgb1-3-GAPDH
TRUE	255	E5	Sample 101	21.62		0		siItgb1-3-GAPDH
TRUE	255	E6	Sample 102	21.81		0		siItgb1-3-GAPDH
TRUE	255	E7	Sample 103	29.57		0		siItgb1-4
TRUE	255	E8	Sample 104	28.5		0		siItgb1-4
TRUE	255	E9	Sample 105	28.64		0		siItgb1-4
TRUE	255	E10	Sample 106	19.89		0		siItgb1-4-GAPDH
TRUE	255	E11	Sample 107	19.92		0		siItgb1-4-GAPDH
TRUE	255	E12	Sample 108	19.73		0		siItgb1-4-GAPDH
TRUE	255	F1	Sample 121	20.76		0		siItgb1-5
TRUE	255	F2	Sample 122	20.33		0		siItgb1-5
TRUE	255	F3	Sample 123	21.04		0		siItgb1-5
TRUE	255	F4	Sample 124	12.84		0		siItgb1-5-GAPDH
TRUE	255	F5	Sample 125	12.74		0		siItgb1-5-GAPDH
TRUE	255	F6	Sample 126	12.94		0		siItgb1-5-GAPDH
TRUE	255	F7	Sample 127	25.03		0		siItgb1-6
TRUE	255	F8	Sample 128	25.87		0		siItgb1-6
TRUE	255	F9	Sample 129	25.54		0		siItgb1-6
TRUE	255	F10	Sample 130	17.36		0		siItgb1-6-GAPDH
TRUE	255	F11	Sample 131	17.29		0		siItgb1-6-GAPDH
TRUE	255	F12	Sample 132	17.42		0		siItgb1-6-GAPDH
TRUE	255	G1	Sample 145	19.8		0		siItgb1	Calibration
TRUE	255	G2	Sample 146	19.93		0		siItgb1
TRUE	255	G3	Sample 147	20.1		0		siItgb1
TRUE	255	G4	Sample 148	18.45		0		siItgb1-GAPDH
TRUE	255	G5	Sample 149	18.57		0		siItgb1-GAPDH
TRUE	255	G6	Sample 150	18.67		0		siItgb1-GAPDH
