# Supplementary material for: Single-cell RNA-seq of heart reveals intercellular communication drivers of myocardial fibrosis in diabetic cardiomyopathy
Source: eLife. 2023 Apr 3;12:e80479. doi: 10.7554/eLife.80479 (PMC10110238; doi:10.7554/eLife.80479)
Supplement: Figure 6—source data 2. [file elife-80479-fig6-data2.xlsx]

## Sheet: tM
Experiment: siItgb1_5 month Selected Filter: SYBR Green I / HRM Dye (465-510)
Include	Color	Pos	Name	Cp	Concentration	Standard	Status
TRUE	255	A1	Sample 1	51.53		0		Con1-Itgb1	Experiment
TRUE	255	A2	Sample 2	52.76		0		Con1-Itgb1					51.86	45.93	5.93			45.38	37.14	8.24
TRUE	255	A3	Sample 3	51.3		0		Con1-Itgb1					41.22	34.62	6.6			43.1	35.26	7.84
TRUE	255	A4	Sample 4	45.78		0		Con1-GAPDH					35.51	29.05	6.46			47.07	39	8.07
TRUE	255	A5	Sample 5	45.91		0		Con1-GAPDH					45.07	38.86	6.21			33.6	25.67	7.93
TRUE	255	A6	Sample 6	46.09		0		Con1-GAPDH					38.5	32.38	6.12			38.29	30.27	8.02
TRUE	255	A7	Sample 7	41.27		0		Con2-Itgb1					39.38	33.51	5.87			34.62	26.32	8.3
TRUE	255	A8	Sample 8	41.18		0		Con2-Itgb1
TRUE	255	A9	Sample 9	41.2		0		Con2-Itgb1
TRUE	255	A10	Sample 10	34.51		0		Con2-GAPDH
TRUE	255	A11	Sample 11	34.71		0		Con2-GAPDH
TRUE	255	A12	Sample 12	34.65		0		Con2-GAPDH
TRUE	255	B1	Sample 25	35.35		0		Con3-Itgb1
TRUE	255	B2	Sample 26	35.34		0		Con3-Itgb1						5.93	8.24
TRUE	255	B3	Sample 27	35.83		0		Con3-Itgb1						6.6	7.84
TRUE	255	B4	Sample 28	29.07		0		Con3-GAPDH						6.46	8.07
TRUE	255	B5	Sample 29	29.12		0		Con3-GAPDH						6.21	7.93
TRUE	255	B6	Sample 30	28.97		0		Con3-GAPDH						6.12	8.02
TRUE	255	B7	Sample 31	44.31		0		Con4-Itgb1						5.87	8.3
TRUE	255	B8	Sample 32	45.36		0		Con4-Itgb1
TRUE	255	B9	Sample 33	45.53		0		Con4-Itgb1
TRUE	255	B10	Sample 34	38.83		0		Con4-GAPDH
TRUE	255	B11	Sample 35	38.84		0		Con4-GAPDH
TRUE	255	B12	Sample 36	38.91		0		Con4-GAPDH
TRUE	255	C1	Sample 49	38.47		0		Con5-Itgb1					5 month	siControl	siItgb1
TRUE	255	C2	Sample 50	38.46		0		Con5-Itgb1					ΔCT	5.93	8.24
TRUE	255	C3	Sample 51	38.58		0		Con5-Itgb1						6.6	7.84
TRUE	255	C4	Sample 52	32.38		0		Con5-GAPDH						6.46	8.07
TRUE	255	C5	Sample 53	32.31		0		Con5-GAPDH						6.21	7.93
TRUE	255	C6	Sample 54	32.45		0		Con5-GAPDH						6.12	8.02
TRUE	255	C7	Sample 55	39.16		0		Con6-Itgb1						5.87	8.3
TRUE	255	C8	Sample 56	39.7		0		Con6-Itgb1
TRUE	255	C9	Sample 57	39.28		0		Con6-Itgb1
TRUE	255	C10	Sample 58	33.61		0		Con6-GAPDH					ΔΔCT	4.4	6.71
TRUE	255	C11	Sample 59	33.42		0		Con6-GAPDH						5.07	6.31
TRUE	255	C12	Sample 60	33.51		0		Con6-GAPDH						4.93	6.54
TRUE	255	D1	Sample 73	45.32		0		siItgb1-1						4.68	6.4
TRUE	255	D2	Sample 74	45.58		0		siItgb1-1						4.59	6.49
TRUE	255	D3	Sample 75	45.24		0		siItgb1-1						4.34	6.77
TRUE	255	D4	Sample 76	37.14		0		siItgb1-1-GAPDH
TRUE	255	D5	Sample 77	37.21		0		siItgb1-1-GAPDH
TRUE	255	D6	Sample 78	37.08		0		siItgb1-1-GAPDH
TRUE	255	D7	Sample 79	43.26		0		siItgb1-2					2^-ΔΔCT	0.0473661	0.00955188
TRUE	255	D8	Sample 80	43.83		0		siItgb1-2						0.0297699	0.0126038
TRUE	255	D9	Sample 81	42.2		0		siItgb1-2						0.0328036	0.0107464
TRUE	255	D10	Sample 82	35.29		0		siItgb1-2-GAPDH						0.0390103	0.0118415
TRUE	255	D11	Sample 83	35.16		0		siItgb1-2-GAPDH						0.0415214	0.0111254
TRUE	255	D12	Sample 84	35.34		0		siItgb1-2-GAPDH						0.0493776	0.00916277
TRUE	255	E1	Sample 97	47.31		0		siItgb1-3						0.0399748
TRUE	255	E2	Sample 98	46.5		0		siItgb1-3
TRUE	255	E3	Sample 99	47.41		0		siItgb1-3
TRUE	255	E4	Sample 100	39.12		0		siItgb1-3-GAPDH					relative(100%)	1.1849	0.238947
TRUE	255	E5	Sample 101	38.86		0		siItgb1-3-GAPDH						0.744717	0.315293
TRUE	255	E6	Sample 102	39.02		0		siItgb1-3-GAPDH						0.820607	0.26883
TRUE	255	E7	Sample 103	33.65		0		siItgb1-4						0.975872	0.296225
TRUE	255	E8	Sample 104	33.5		0		siItgb1-4						1.03869	0.27831
TRUE	255	E9	Sample 105	33.64		0		siItgb1-4						1.23522	0.229213
TRUE	255	E10	Sample 106	25.58		0		siItgb1-4-GAPDH
TRUE	255	E11	Sample 107	25.68		0		siItgb1-4-GAPDH
TRUE	255	E12	Sample 108	25.75		0		siItgb1-4-GAPDH
TRUE	255	F1	Sample 121	38.53		0		siItgb1-5
TRUE	255	F2	Sample 122	38.12		0		siItgb1-5
TRUE	255	F3	Sample 123	38.21		0		siItgb1-5
TRUE	255	F4	Sample 124	30.44		0		siItgb1-5-GAPDH
TRUE	255	F5	Sample 125	30.14		0		siItgb1-5-GAPDH
TRUE	255	F6	Sample 126	30.22		0		siItgb1-5-GAPDH
TRUE	255	F7	Sample 127	34.56		0		siItgb1-6
TRUE	255	F8	Sample 128	34.78		0		siItgb1-6
TRUE	255	F9	Sample 129	34.51		0		siItgb1-6
TRUE	255	F10	Sample 130	26.28		0		siItgb1-6-GAPDH
TRUE	255	F11	Sample 131	26.27		0		siItgb1-6-GAPDH
TRUE	255	F12	Sample 132	26.42		0		siItgb1-6-GAPDH
TRUE	255	G1	Sample 145	32.84		0		siItgb1	Calibration
TRUE	255	G2	Sample 146	32.87		0		siItgb1
TRUE	255	G3	Sample 147	33.98		0		siItgb1
TRUE	255	G4	Sample 148	31.43		0		siItgb1-GAPDH
TRUE	255	G5	Sample 149	31.29		0		siItgb1-GAPDH
TRUE	255	G6	Sample 150	32.37		0		siItgb1-GAPDH
