# Supplementary material for: Single-cell RNA-seq of heart reveals intercellular communication drivers of myocardial fibrosis in diabetic cardiomyopathy
Source: eLife. 2023 Apr 3;12:e80479. doi: 10.7554/eLife.80479 (PMC10110238; doi:10.7554/eLife.80479)
Supplement: Supplementary file 3. [file elife-80479-supp3.xls]

## Sheet: Sheet1
Supplementary file 3: The top 10 upregulated genes in the cardiac populations
Cluster	GeneID	GeneName	Control	T2DM	cells.1	cells.2	pct.1	pct.2	log2FC	p_value	p_val_adjust	significance
Cardiomyocytes	ENSMUSG00000002289	Angptl4	0.056905	1.28003	2035	1741	0.01	0.276	4.48906	1.51728e-149	4.62453e-145	up
Cardiomyocytes	ENSMUSG00000092356	Gm20532	0.534702	1.61329	2035	1741	0.103	0.315	1.59302	5.91623e-60	1.80321e-55	up
Cardiomyocytes	ENSMUSG00000024978	Gpam	0.775102	1.91574	2035	1741	0.137	0.364	1.30533	1.17371e-62	3.57736e-58	up
Cardiomyocytes	ENSMUSG00000027875	Hmgcs2	0.051529	1.18602	2035	1741	0.01	0.235	4.52193	6.142e-121	1.87202e-116	up
Cardiomyocytes	ENSMUSG00000053964	Lgals4	0.588582	2.4647	2035	1741	0.119	0.388	2.06591	7.53971e-85	2.29803e-80	up
Cardiomyocytes	ENSMUSG00000019577	Pdk4	0.794127	11.444	2035	1741	0.135	0.764	3.84891	0	0	up
Cardiomyocytes	ENSMUSG00000030852	Tacc2	5.11306	12.3522	2035	1741	0.497	0.694	1.27249	9.20953e-80	2.80697e-75	up
Cardiomyocytes	ENSMUSG00000038393	Txnip	3.05569	8.75047	2035	1741	0.403	0.767	1.51783	1.93406e-143	5.89482e-139	up
Cardiomyocytes	ENSMUSG00000032942	Ucp3	0.163738	2.01242	2035	1741	0.036	0.357	3.61866	2.87427e-154	8.76048e-150	up
Cardiomyocytes	ENSMUSG00000058997	Vwa8	2.18318	5.81851	2035	1741	0.286	0.558	1.41418	5.66433e-73	1.72643e-68	up
Endocardial_cells	ENSMUSG00000046718	Bst2	3.04898	6.60048	1311	1009	0.422	0.624	1.11422	1.0163e-30	3.09757e-26	up
Endocardial_cells	ENSMUSG00000073555	Gm4951	0.575659	1.96167	1311	1009	0.104	0.314	1.76862	7.23632e-36	2.20556e-31	up
Endocardial_cells	ENSMUSG00000073409	H2-Q6	0.212663	0.99581	1311	1009	0.045	0.187	2.22677	1.60122e-27	4.88036e-23	up
Endocardial_cells	ENSMUSG00000079017	Ifi27l2a	0.516502	2.05291	1311	1009	0.092	0.31	1.99061	5.45633e-40	1.66303e-35	up
Endocardial_cells	ENSMUSG00000028037	Ifi44	0.0774604	0.871422	1311	1009	0.016	0.147	3.49015	2.51378e-34	7.66174e-30	up
Endocardial_cells	ENSMUSG00000074896	Ifit3	0.0801012	0.767188	1311	1009	0.018	0.144	3.25807	6.3909e-32	1.94788e-27	up
Endocardial_cells	ENSMUSG00000029561	Oasl2	0.305314	1.3647	1311	1009	0.059	0.229	2.15985	1.33396e-32	4.06577e-28	up
Endocardial_cells	ENSMUSG00000019577	Pdk4	0.273646	1.90863	1311	1009	0.056	0.331	2.8017	3.03528e-68	9.25123e-64	up
Endocardial_cells	ENSMUSG00000070327	Rnf213	0.860617	3.22501	1311	1009	0.149	0.41	1.90574	2.67001e-49	8.13793e-45	up
Endocardial_cells	ENSMUSG00000038393	Txnip	2.77821	6.23195	1311	1009	0.401	0.676	1.1655	4.8328e-48	1.47299e-43	up
Endothelial_cells	ENSMUSG00000030022	Adamts9	3.99458	9.43392	2402	2880	0.384	0.638	1.23979	5.90529e-95	1.79987e-90	up
Endothelial_cells	ENSMUSG00000002289	Angptl4	0.0787357	1.49479	2402	2880	0.015	0.256	4.24504	1.43914e-162	4.38636e-158	up
Endothelial_cells	ENSMUSG00000040283	Btnl9	2.32107	5.95126	2402	2880	0.263	0.512	1.35836	3.80454e-85	1.15959e-80	up
Endothelial_cells	ENSMUSG00000029798	Herc6	1.12237	3.49902	2402	2880	0.164	0.384	1.64031	2.9298e-75	8.92974e-71	up
Endothelial_cells	ENSMUSG00000028037	Ifi44	0.191196	1.60975	2402	2880	0.031	0.222	3.07304	1.12457e-102	3.42759e-98	up
Endothelial_cells	ENSMUSG00000032690	Oas2	0.365653	1.39193	2402	2880	0.06	0.233	1.92824	3.25133e-73	9.90973e-69	up
Endothelial_cells	ENSMUSG00000029561	Oasl2	0.351701	1.87578	2402	2880	0.055	0.262	2.41474	1.06435e-96	3.24404e-92	up
Endothelial_cells	ENSMUSG00000019577	Pdk4	0.362031	2.2594	2402	2880	0.065	0.334	2.64142	1.0183e-138	3.10367e-134	up
Endothelial_cells	ENSMUSG00000070327	Rnf213	1.39855	4.38605	2402	2880	0.197	0.466	1.64893	2.66936e-101	8.13595e-97	up
Endothelial_cells	ENSMUSG00000038393	Txnip	5.06611	10.2845	2402	2880	0.546	0.766	1.0215	1.45541e-105	4.43595e-101	up
Epicardial_cells	ENSMUSG00000002289	Angptl4	0.0203484	0.698932	481	309	0.004	0.126	5.0953	3.31308e-14	1.00979e-09	up
Epicardial_cells	ENSMUSG00000020589	Fam49a	0.768351	1.83601	481	309	0.156	0.33	1.25662	7.46611e-08	0.00227559	up
Epicardial_cells	ENSMUSG00000108489	Gm45025	0.492645	1.23667	481	309	0.1	0.243	1.32767	6.14891e-07	0.0187413	up
Epicardial_cells	ENSMUSG00000027875	Hmgcs2	0.221162	1.48208	481	309	0.046	0.275	2.74389	4.68665e-19	1.42844e-14	up
Epicardial_cells	ENSMUSG00000079017	Ifi27l2a	1.41656	3.25587	481	309	0.239	0.401	1.20059	1.04376e-06	0.0318129	up
Epicardial_cells	ENSMUSG00000037465	Klf10	0.205018	0.455416	481	309	0.042	0.126	1.15105	7.73374e-07	0.0235717	up
Epicardial_cells	ENSMUSG00000037236	Matr3	0.833196	1.68621	481	309	0.181	0.346	1.01697	1.04568e-06	0.0318712	up
Epicardial_cells	ENSMUSG00000047638	Nr1h4	0.134358	0.502992	481	309	0.027	0.12	1.90366	5.54999e-07	0.0169158	up
Epicardial_cells	ENSMUSG00000019577	Pdk4	0.280518	1.97593	481	309	0.054	0.337	2.81593	1.698e-24	5.17535e-20	up
Epicardial_cells	ENSMUSG00000020806	Rhbdf2	0.168643	0.554445	481	309	0.031	0.129	1.71648	3.24244e-07	0.00988264	up
Fibroblasts	ENSMUSG00000002289	Angptl4	0.111848	1.90288	3428	2988	0.022	0.344	4.08736	1.92937e-288	5.88052e-284	up
Fibroblasts	ENSMUSG00000027875	Hmgcs2	0.399924	1.51959	3428	2988	0.077	0.288	1.92562	4.41518e-111	1.3457e-106	up
Fibroblasts	ENSMUSG00000079017	Ifi27l2a	1.55929	5.06227	3428	2988	0.235	0.524	1.69884	6.66594e-138	2.03171e-133	up
Fibroblasts	ENSMUSG00000033880	Lgals3bp	0.496957	1.33739	3428	2988	0.097	0.265	1.42804	4.18229e-71	1.27472e-66	up
Fibroblasts	ENSMUSG00000029561	Oasl2	0.234306	1.00744	3428	2988	0.045	0.178	2.10375	1.28572e-67	3.91874e-63	up
Fibroblasts	ENSMUSG00000019577	Pdk4	0.297233	1.80748	3428	2988	0.058	0.321	2.60391	8.45531e-172	2.57709e-167	up
Fibroblasts	ENSMUSG00000070327	Rnf213	0.800753	2.18813	3428	2988	0.138	0.318	1.45016	6.10645e-67	1.86119e-62	up
Fibroblasts	ENSMUSG00000026222	Sp100	0.941116	2.04918	3428	2988	0.166	0.346	1.12252	8.70436e-62	2.653e-57	up
Fibroblasts	ENSMUSG00000038393	Txnip	2.63066	5.81822	3428	2988	0.39	0.672	1.14512	1.10317e-126	3.36237e-122	up
Fibroblasts	ENSMUSG00000011171	Vipr2	0.260398	0.784765	3428	2988	0.052	0.173	1.59117	6.82177e-58	2.07921e-53	up
Lymphatic_ECs	ENSMUSG00000079017	Ifi27l2a	1.30834	5.12733	180	128	0.189	0.586	1.97039	3.9948e-12	1.21758e-07	up
Lymphatic_ECs	ENSMUSG00000028037	Ifi44	0.0387958	1.15512	180	128	0.006	0.195	4.89241	2.66641e-09	8.12694e-05	up
Lymphatic_ECs	ENSMUSG00000034459	Ifit1	0.0740832	1.27561	180	128	0.017	0.18	4.10406	1.08986e-06	0.033218	up
Lymphatic_ECs	ENSMUSG00000019577	Pdk4	0.37206	1.78076	180	128	0.072	0.328	2.25858	4.91189e-08	0.0014971	up
macrophages	ENSMUSG00000002289	Angptl4	0.0106418	0.549092	1381	1398	0.002	0.112	5.676	6.16313e-44	1.87846e-39	up
macrophages	ENSMUSG00000073491	Ifi213	0.536467	2.47402	1381	1398	0.079	0.3	2.20509	1.99617e-51	6.08411e-47	up
macrophages	ENSMUSG00000079017	Ifi27l2a	1.2497	3.67369	1381	1398	0.204	0.462	1.55557	1.45844e-49	4.44518e-45	up
macrophages	ENSMUSG00000090272	Mndal	2.52016	5.22988	1381	1398	0.365	0.582	1.05324	1.45281e-35	4.42802e-31	up
macrophages	ENSMUSG00000032690	Oas2	0.848294	2.50109	1381	1398	0.154	0.392	1.55981	6.45829e-46	1.96842e-41	up
macrophages	ENSMUSG00000029561	Oasl2	0.41782	1.91313	1381	1398	0.071	0.285	2.19471	9.25964e-51	2.82225e-46	up
macrophages	ENSMUSG00000019577	Pdk4	0.277482	1.95799	1381	1398	0.054	0.315	2.81846	1.75961e-75	5.36311e-71	up
macrophages	ENSMUSG00000028494	Plin2	0.83135	2.86677	1381	1398	0.155	0.444	1.78578	4.37872e-64	1.33459e-59	up
macrophages	ENSMUSG00000026748	Plxdc2	1.73647	6.03867	1381	1398	0.203	0.449	1.79802	8.57295e-50	2.61295e-45	up
macrophages	ENSMUSG00000070327	Rnf213	1.34896	3.81147	1381	1398	0.211	0.422	1.49843	3.17764e-37	9.68514e-33	up
pericytes	ENSMUSG00000036545	Adamts2	0.92588	2.21079	428	815	0.138	0.341	1.25557	8.98635e-15	2.73895e-10	up
pericytes	ENSMUSG00000025083	Afap1l2	0.447545	1.40372	428	815	0.068	0.238	1.64894	5.48377e-15	1.6714e-10	up
pericytes	ENSMUSG00000002289	Angptl4	0.0364067	1.10814	428	815	0.007	0.194	4.92396	5.64268e-27	1.71983e-22	up
pericytes	ENSMUSG00000024222	Fkbp5	0.340062	1.34962	428	815	0.056	0.216	1.98837	4.65411e-14	1.41853e-09	up
pericytes	ENSMUSG00000021360	Gcnt2	1.35594	5.42151	428	815	0.196	0.561	1.99932	4.46659e-38	1.36137e-33	up
pericytes	ENSMUSG00000019577	Pdk4	0.403253	2.18288	428	815	0.068	0.31	2.43618	1.42132e-24	4.33205e-20	up
pericytes	ENSMUSG00000027750	Postn	3.74101	8.2278	428	815	0.437	0.65	1.13706	1.86979e-19	5.69893e-15	up
pericytes	ENSMUSG00000000440	Pparg	0.417917	1.28287	428	815	0.056	0.205	1.61785	1.36309e-13	4.15455e-09	up
pericytes	ENSMUSG00000001768	Rin2	0.589548	2.00799	428	815	0.091	0.301	1.7679	9.48894e-18	2.89213e-13	up
pericytes	ENSMUSG00000038393	Txnip	3.60636	7.79909	428	815	0.439	0.704	1.11274	8.67216e-24	2.64319e-19	up
