# Supplementary material for: Single-cell RNA-seq of heart reveals intercellular communication drivers of myocardial fibrosis in diabetic cardiomyopathy
Source: eLife. 2023 Apr 3;12:e80479. doi: 10.7554/eLife.80479 (PMC10110238; doi:10.7554/eLife.80479)
Supplement: Supplementary file 4. [file elife-80479-supp4.xls]

## Sheet: Supplement Table 3
Supplementary file 4: Unique differentially-expressed genes (uni-DEGs) in the cardiac populations
Cluster	GeneID	Control	T2DM	cells.1	cells.2	pct.1	pct.2	log2FC	p_value	p_val_adjust	significance	Symbol
Cardiomyocytes	ENSMUSG00000032942	0.163738	2.01242	2035	1741	0.036	0.357	3.61947	2.91e-154	8.86e-150	up	Ucp3
Cardiomyocytes	ENSMUSG00000021275	0.158515	1.59006	2035	1741	0.033	0.106	3.32639	7.06e-20	2.15e-15	up	Tecpr2
Cardiomyocytes	ENSMUSG00000072949	0.12685	0.609823	2035	1741	0.025	0.126	2.26527	4.63e-35	1.41e-30	up	Acot1
Cardiomyocytes	ENSMUSG00000053964	0.588582	2.4647	2035	1741	0.119	0.388	2.0661	7.97e-85	2.43e-80	up	Lgals4
Cardiomyocytes	ENSMUSG00000069919	0.436804	1.57102	2035	1741	0.044	0.117	1.84664	2.46e-16	7.5e-12	up	Hba-a1
Cardiomyocytes	ENSMUSG00000043085	0.11797	0.405963	2035	1741	0.027	0.117	1.78292	1.79e-30	5.44e-26	up	Tmem82
Cardiomyocytes	ENSMUSG00000085643	0.116741	0.401403	2035	1741	0.024	0.107	1.78173	7.44e-30	2.27e-25	up	Gm12519
Cardiomyocytes	ENSMUSG00000024525	0.181926	0.595087	2035	1741	0.037	0.163	1.70974	1.38e-45	4.21e-41	up	Impa2
Cardiomyocytes	ENSMUSG00000118099	0.257777	0.819674	2035	1741	0.047	0.189	1.66893	1.42e-45	4.34e-41	up	Gm31356
Cardiomyocytes	ENSMUSG00000075270	0.180818	0.568209	2035	1741	0.035	0.122	1.65188	2.27e-24	6.92e-20	up	Pde11a
Cardiomyocytes	ENSMUSG00000092356	0.534702	1.61329	2035	1741	0.103	0.315	1.5932	6.1e-60	1.86e-55	up	Gm20532
Cardiomyocytes	ENSMUSG00000090799	0.134781	0.405771	2035	1741	0.029	0.103	1.59005	2.24e-22	6.81e-18	up	Klhl33
Cardiomyocytes	ENSMUSG00000114800	0.169804	0.479738	2035	1741	0.034	0.128	1.49837	7.1e-30	2.16e-25	up	Gm31600
Cardiomyocytes	ENSMUSG00000107538	0.170468	0.476862	2035	1741	0.034	0.127	1.48407	1.11e-31	3.39e-27	up	Gm44127
Cardiomyocytes	ENSMUSG00000019082	0.127813	0.346831	2035	1741	0.023	0.102	1.44019	2.34e-32	7.12e-28	up	Slc25a22
Cardiomyocytes	ENSMUSG00000118020	0.178252	0.466107	2035	1741	0.035	0.113	1.38674	1.6e-22	4.87e-18	up	Gm35438
Cardiomyocytes	ENSMUSG00000024905	0.149706	0.380166	2035	1741	0.032	0.111	1.3445	2.9e-24	8.84e-20	up	Tesmin
Cardiomyocytes	ENSMUSG00000024978	0.775102	1.91574	2035	1741	0.137	0.364	1.30544	1.28e-62	3.91e-58	up	Gpam
Cardiomyocytes	ENSMUSG00000030852	5.11306	12.3522	2035	1741	0.497	0.694	1.27251	1.18e-79	3.58e-75	up	Tacc2
Cardiomyocytes	ENSMUSG00000112089	0.507347	1.22124	2035	1741	0.061	0.165	1.2673	3.76e-25	1.15e-20	up	Gm47712
Cardiomyocytes	ENSMUSG00000018900	0.176848	0.424501	2035	1741	0.035	0.121	1.26326	2.93e-30	8.93e-26	up	Slc22a5
Cardiomyocytes	ENSMUSG00000100954	0.173981	0.413676	2035	1741	0.039	0.121	1.24957	1.88e-25	5.73e-21	up	Gm10138
Cardiomyocytes	ENSMUSG00000112800	0.1937	0.460394	2035	1741	0.029	0.102	1.24905	7.47e-24	2.28e-19	up	Gm40604
Cardiomyocytes	ENSMUSG00000050541	0.65028	1.53817	2035	1741	0.117	0.3	1.24208	2.42e-48	7.38e-44	up	Adra1b
Cardiomyocytes	ENSMUSG00000045106	0.2557	0.600287	2035	1741	0.049	0.159	1.2312	2.46e-35	7.5e-31	up	Ccdc73
Cardiomyocytes	ENSMUSG00000114898	0.317123	0.713991	2035	1741	0.062	0.18	1.17086	4.23e-35	1.29e-30	up	Gm49390
Cardiomyocytes	ENSMUSG00000037709	0.65394	1.47113	2035	1741	0.11	0.263	1.1697	9.04e-37	2.76e-32	up	Fam13a
Cardiomyocytes	ENSMUSG00000084960	0.35806	0.803237	2035	1741	0.075	0.188	1.16562	1.9e-27	5.79e-23	up	B430010I23Rik
Cardiomyocytes	ENSMUSG00000087236	0.180552	0.40199	2035	1741	0.036	0.11	1.15475	9.12e-23	2.78e-18	up	Kif28
Cardiomyocytes	ENSMUSG00000037143	0.181447	0.402789	2035	1741	0.035	0.103	1.15047	1.13e-19	3.44e-15	up	Cfap61
Cardiomyocytes	ENSMUSG00000093400	1.51638	3.31466	2035	1741	0.198	0.381	1.12823	1.25e-34	3.8e-30	up	Gm20647
Cardiomyocytes	ENSMUSG00000090086	0.155937	0.336167	2035	1741	0.036	0.107	1.10822	7.97e-23	2.43e-18	up	AI480526
Cardiomyocytes	ENSMUSG00000030849	5.73514	12.145	2035	1741	0.434	0.568	1.08246	1.36e-44	4.14e-40	up	Fgfr2
Cardiomyocytes	ENSMUSG00000028573	0.222714	0.471409	2035	1741	0.04	0.115	1.08179	5.14e-24	1.57e-19	up	Fggy
Cardiomyocytes	ENSMUSG00000085022	0.233788	0.493855	2035	1741	0.046	0.128	1.07889	5.65e-24	1.72e-19	up	Gm5860
Cardiomyocytes	ENSMUSG00000040740	0.526657	1.09561	2035	1741	0.098	0.253	1.05679	1.74e-45	5.31e-41	up	Slc25a34
Cardiomyocytes	ENSMUSG00000032602	0.483431	1.00394	2035	1741	0.082	0.229	1.05429	7.53e-47	2.29e-42	up	Slc25a20
Cardiomyocytes	ENSMUSG00000022617	0.201241	0.416992	2035	1741	0.043	0.121	1.05109	4.39e-24	1.34e-19	up	Chkb
Cardiomyocytes	ENSMUSG00000037411	0.224167	0.461271	2035	1741	0.049	0.118	1.04104	1.78e-17	5.43e-13	up	Serpine1
Cardiomyocytes	ENSMUSG00000022040	1.43699	2.94185	2035	1741	0.241	0.48	1.03368	4.87e-53	1.48e-48	up	Ephx2
Cardiomyocytes	ENSMUSG00000029267	0.242451	0.493817	2035	1741	0.049	0.12	1.02628	6.1e-18	1.86e-13	up	Mtf2
Cardiomyocytes	ENSMUSG00000002346	0.528227	1.07434	2035	1741	0.102	0.262	1.02423	5.13e-46	1.56e-41	up	Slc25a42
Cardiomyocytes	ENSMUSG00000046982	0.629934	1.2761	2035	1741	0.112	0.265	1.01847	2.52e-39	7.67e-35	up	Tshz1
Cardiomyocytes	ENSMUSG00000070424	0.403382	0.816441	2035	1741	0.086	0.194	1.0172	1.31e-24	3.98e-20	up	Art5
Cardiomyocytes	ENSMUSG00000092399	0.290998	0.586212	2035	1741	0.059	0.153	1.01041	8.9e-26	2.71e-21	up	4930556N13Rik
Cardiomyocytes	ENSMUSG00000025453	0.269648	0.540469	2035	1741	0.051	0.153	1.00313	4.28e-35	1.31e-30	up	Nnt
Cardiomyocytes	ENSMUSG00000018263	0.4174	0.835453	2035	1741	0.074	0.164	1.00113	1.09e-19	3.32e-15	up	Tbx5
Cardiomyocytes	ENSMUSG00000003948	0.326115	0.649493	2035	1741	0.062	0.165	0.993932	5.85e-31	1.78e-26	up	Mmd
Cardiomyocytes	ENSMUSG00000112950	0.283082	0.561635	2035	1741	0.057	0.136	0.988413	9.73e-20	2.97e-15	up	Gm32369
Cardiomyocytes	ENSMUSG00000087413	0.312692	0.619265	2035	1741	0.061	0.161	0.985816	1.11e-28	3.38e-24	up	Gm11266
Cardiomyocytes	ENSMUSG00000117696	0.335286	0.662697	2035	1741	0.074	0.182	0.982956	4.05e-30	1.23e-25	up	Gm50100
Cardiomyocytes	ENSMUSG00000012296	0.19469	0.384028	2035	1741	0.041	0.107	0.980031	2.29e-19	6.97e-15	up	Tjap1
Cardiomyocytes	ENSMUSG00000025537	0.364532	0.717464	2035	1741	0.065	0.167	0.97686	3.66e-28	1.12e-23	up	Phkg1
Cardiomyocytes	ENSMUSG00000051351	0.251998	0.495622	2035	1741	0.053	0.139	0.975826	1.22e-26	3.71e-22	up	Zfp46
Cardiomyocytes	ENSMUSG00000005220	4.20564	8.17513	2035	1741	0.374	0.567	0.958917	7.65e-38	2.33e-33	up	Corin
Cardiomyocytes	ENSMUSG00000021457	0.281765	0.547237	2035	1741	0.06	0.142	0.95767	1.01e-20	3.07e-16	up	Syk
Cardiomyocytes	ENSMUSG00000042213	0.209325	0.406236	2035	1741	0.046	0.115	0.956573	4.21e-19	1.28e-14	up	Zfand4
Cardiomyocytes	ENSMUSG00000039701	0.217474	0.418714	2035	1741	0.045	0.122	0.945119	1.63e-24	4.95e-20	up	Usp53
Cardiomyocytes	ENSMUSG00000087700	1.2793	2.46174	2035	1741	0.184	0.354	0.944325	1.3e-31	3.96e-27	up	Gm15283
Cardiomyocytes	ENSMUSG00000108322	0.643707	1.22978	2035	1741	0.116	0.267	0.933926	7.56e-37	2.3e-32	up	5430431A17Rik
Cardiomyocytes	ENSMUSG00000033182	1.97304	3.7507	2035	1741	0.297	0.481	0.92674	1.96e-33	5.97e-29	up	Kbtbd12
Cardiomyocytes	ENSMUSG00000039005	0.636863	1.21052	2035	1741	0.102	0.205	0.926575	1.47e-19	4.48e-15	up	Tlr4
Cardiomyocytes	ENSMUSG00000023066	0.216215	0.410497	2035	1741	0.043	0.102	0.924907	1.41e-15	4.31e-11	up	Rttn
Cardiomyocytes	ENSMUSG00000104302	0.835079	1.5711	2035	1741	0.124	0.248	0.911796	1.05e-23	3.19e-19	up	Gm36975
Cardiomyocytes	ENSMUSG00000114196	0.37647	0.707344	2035	1741	0.071	0.182	0.909878	8.69e-35	2.65e-30	up	Gm47547
Cardiomyocytes	ENSMUSG00000059895	0.819938	1.53965	2035	1741	0.147	0.302	0.90902	3.33e-35	1.02e-30	up	Ptp4a3
Cardiomyocytes	ENSMUSG00000034614	0.260454	0.488997	2035	1741	0.053	0.127	0.908797	1.51e-19	4.59e-15	up	Pik3ip1
Cardiomyocytes	ENSMUSG00000038122	0.206883	0.388211	2035	1741	0.044	0.101	0.90803	3.41e-15	1.04e-10	up	Tbc1d32
Cardiomyocytes	ENSMUSG00000042793	0.574788	1.07137	2035	1741	0.108	0.236	0.898358	1.89e-30	5.77e-26	up	Lgr6
Cardiomyocytes	ENSMUSG00000023927	0.229706	0.425787	2035	1741	0.045	0.11	0.890345	2.01e-18	6.12e-14	up	Satb1
Cardiomyocytes	ENSMUSG00000020059	0.410215	0.759128	2035	1741	0.079	0.175	0.887962	4.36e-22	1.33e-17	up	Sycp3
Cardiomyocytes	ENSMUSG00000023044	0.337946	0.624241	2035	1741	0.072	0.172	0.88531	8.63e-28	2.63e-23	up	Csad
Cardiomyocytes	ENSMUSG00000034040	0.289807	0.534326	2035	1741	0.057	0.116	0.882625	7.29e-13	2.22e-08	up	Galnt17
Cardiomyocytes	ENSMUSG00000028383	1.51155	2.7831	2035	1741	0.255	0.473	0.880661	3.11e-46	9.48e-42	up	Hsdl2
Cardiomyocytes	ENSMUSG00000024413	0.456508	0.839521	2035	1741	0.092	0.19	0.878927	4.52e-21	1.38e-16	up	Npc1
Cardiomyocytes	ENSMUSG00000026011	0.211852	0.389395	2035	1741	0.044	0.11	0.878177	2.61e-19	7.96e-15	up	Ctla4
Cardiomyocytes	ENSMUSG00000097525	0.230614	0.423094	2035	1741	0.046	0.109	0.875496	3.39e-17	1.03e-12	up	Platr31
Cardiomyocytes	ENSMUSG00000034832	0.261688	0.478891	2035	1741	0.054	0.119	0.871847	1.58e-15	4.82e-11	up	Tet3
Cardiomyocytes	ENSMUSG00000104336	0.268834	0.491318	2035	1741	0.051	0.109	0.86994	1.44e-13	4.38e-09	up	Gm34240
Cardiomyocytes	ENSMUSG00000029095	0.459816	0.838834	2035	1741	0.086	0.219	0.867327	9.21e-41	2.81e-36	up	Ablim2
Cardiomyocytes	ENSMUSG00000023999	0.336626	0.612698	2035	1741	0.066	0.15	0.864028	2.53e-21	7.7e-17	up	Kif6
Cardiomyocytes	ENSMUSG00000028127	1.38935	2.51304	2035	1741	0.239	0.434	0.855025	3.93e-37	1.2e-32	up	Abcd3
Cardiomyocytes	ENSMUSG00000021898	1.33068	2.3927	2035	1741	0.216	0.389	0.846482	8.6e-31	2.62e-26	up	Asb14
Cardiomyocytes	ENSMUSG00000026839	0.420766	0.755804	2035	1741	0.075	0.17	0.844992	5.05e-25	1.54e-20	up	Upp2
Cardiomyocytes	ENSMUSG00000038342	0.541214	0.970744	2035	1741	0.097	0.219	0.842893	6.02e-32	1.83e-27	up	Mlxip
Cardiomyocytes	ENSMUSG00000107427	0.389497	0.69794	2035	1741	0.063	0.149	0.84149	8.63e-23	2.63e-18	up	Gm43948
Cardiomyocytes	ENSMUSG00000025551	2.77892	4.94087	2035	1741	0.205	0.337	0.830242	7.88e-19	2.4e-14	up	Fgf14
Cardiomyocytes	ENSMUSG00000056367	0.291762	0.518444	2035	1741	0.058	0.145	0.829396	6.81e-28	2.07e-23	up	Actr3b
Cardiomyocytes	ENSMUSG00000022358	1.37127	2.42276	2035	1741	0.222	0.403	0.821136	8.68e-35	2.64e-30	up	Fbxo32
Cardiomyocytes	ENSMUSG00000028057	0.242023	0.426041	2035	1741	0.047	0.103	0.815848	6.06e-14	1.85e-09	up	Rit1
Cardiomyocytes	ENSMUSG00000019996	0.310919	0.545492	2035	1741	0.062	0.142	0.811017	1.87e-23	5.7e-19	up	Map7
Cardiomyocytes	ENSMUSG00000029314	0.308105	0.539981	2035	1741	0.065	0.146	0.809486	1.92e-22	5.86e-18	up	Gpat3
Cardiomyocytes	ENSMUSG00000030214	0.468931	0.819391	2035	1741	0.096	0.211	0.805176	5.04e-31	1.54e-26	up	Plbd1
Cardiomyocytes	ENSMUSG00000042557	0.22285	0.387036	2035	1741	0.042	0.108	0.796397	2.93e-23	8.95e-19	up	Sin3a
Cardiomyocytes	ENSMUSG00000074064	0.514976	0.893751	2035	1741	0.095	0.198	0.795367	2.44e-25	7.43e-21	up	Mlycd
Cardiomyocytes	ENSMUSG00000036833	0.260002	0.450408	2035	1741	0.052	0.121	0.792712	1.81e-20	5.53e-16	up	Pnpla7
Cardiomyocytes	ENSMUSG00000018796	3.40813	5.90074	2035	1741	0.45	0.67	0.791915	5.23e-43	1.59e-38	up	Acsl1
Cardiomyocytes	ENSMUSG00000001211	1.38766	2.39646	2035	1741	0.239	0.431	0.788247	3.14e-38	9.58e-34	up	Agpat3
Cardiomyocytes	ENSMUSG00000034981	1.18247	2.04201	2035	1741	0.198	0.332	0.78819	6.21e-21	1.89e-16	up	Parm1
Cardiomyocytes	ENSMUSG00000029735	0.422045	0.725974	2035	1741	0.076	0.167	0.782522	1.38e-23	4.21e-19	up	Tpk1
Cardiomyocytes	ENSMUSG00000101640	0.818014	1.40534	2035	1741	0.128	0.235	0.780724	5.83e-19	1.78e-14	up	Gm28376
Cardiomyocytes	ENSMUSG00000025271	0.282374	0.483688	2035	1741	0.056	0.124	0.776467	2.41e-18	7.34e-14	up	Pfkfb1
Cardiomyocytes	ENSMUSG00000067399	0.273731	0.468031	2035	1741	0.052	0.129	0.773845	3.35e-24	1.02e-19	up	Trim43c
Cardiomyocytes	ENSMUSG00000041444	0.278818	0.47438	2035	1741	0.06	0.109	0.766723	5.48e-09	0.000167164	up	Arhgap32
Cardiomyocytes	ENSMUSG00000090112	0.333882	0.564415	2035	1741	0.069	0.143	0.757416	1.42e-17	4.33e-13	up	Shprh
Cardiomyocytes	ENSMUSG00000021893	0.450666	0.760485	2035	1741	0.093	0.19	0.754862	1.05e-24	3.2e-20	up	Capn7
Cardiomyocytes	ENSMUSG00000044676	0.213798	0.359196	2035	1741	0.046	0.106	0.748521	1.78e-17	5.44e-13	up	Zfp612
Cardiomyocytes	ENSMUSG00000028223	1.6866	2.83341	2035	1741	0.265	0.424	0.748422	2.86e-25	8.71e-21	up	Decr1
Cardiomyocytes	ENSMUSG00000001419	1.08508	1.82164	2035	1741	0.195	0.368	0.747446	3.37e-38	1.03e-33	up	Mef2d
Cardiomyocytes	ENSMUSG00000038764	0.770923	1.29419	2035	1741	0.14	0.275	0.747391	2.08e-30	6.35e-26	up	Ptpn3
Cardiomyocytes	ENSMUSG00000029685	0.48992	0.821986	2035	1741	0.096	0.203	0.746568	9.68e-28	2.95e-23	up	Asb15
Cardiomyocytes	ENSMUSG00000033308	1.0309	1.7268	2035	1741	0.158	0.298	0.744196	4.78e-28	1.46e-23	up	Dpyd
Cardiomyocytes	ENSMUSG00000042810	0.226043	0.377826	2035	1741	0.047	0.113	0.741128	4.37e-21	1.33e-16	up	Krba1
Cardiomyocytes	ENSMUSG00000026950	0.351606	0.587613	2035	1741	0.056	0.107	0.740907	5.09e-10	1.55e-05	up	Neb
Cardiomyocytes	ENSMUSG00000039782	0.440394	0.73579	2035	1741	0.085	0.185	0.740499	5.39e-28	1.64e-23	up	Cpeb2
Cardiomyocytes	ENSMUSG00000038206	0.303541	0.506942	2035	1741	0.06	0.13	0.739928	3.59e-19	1.1e-14	up	Fbxo8
Cardiomyocytes	ENSMUSG00000026333	0.373702	0.623858	2035	1741	0.078	0.175	0.73933	1.7e-28	5.19e-24	up	Gin1
Cardiomyocytes	ENSMUSG00000085591	0.291781	0.486988	2035	1741	0.058	0.125	0.738999	8.73e-17	2.66e-12	up	Gm13479
Cardiomyocytes	ENSMUSG00000043079	0.508722	0.847668	2035	1741	0.099	0.202	0.736621	1.17e-24	3.56e-20	up	Synpo
Cardiomyocytes	ENSMUSG00000021109	1.20815	1.99887	2035	1741	0.2	0.37	0.72639	8.31e-36	2.53e-31	up	Hif1a
Cardiomyocytes	ENSMUSG00000042350	0.380069	0.62791	2035	1741	0.07	0.157	0.724295	1.27e-26	3.88e-22	up	Arel1
Cardiomyocytes	ENSMUSG00000050945	0.343244	0.567037	2035	1741	0.068	0.138	0.724209	2.18e-17	6.64e-13	up	Zfp438
Cardiomyocytes	ENSMUSG00000031714	1.44133	2.37998	2035	1741	0.224	0.395	0.723555	1.58e-32	4.82e-28	up	Gab1
Cardiomyocytes	ENSMUSG00000038383	0.338699	0.558977	2035	1741	0.07	0.153	0.722785	2.5e-23	7.62e-19	up	Pigu
Cardiomyocytes	ENSMUSG00000037363	0.268165	0.442437	2035	1741	0.057	0.125	0.722354	1.03e-19	3.14e-15	up	Letm2
Cardiomyocytes	ENSMUSG00000010122	0.57314	0.944683	2035	1741	0.111	0.241	0.720941	3.17e-38	9.67e-34	up	Slc47a1
Cardiomyocytes	ENSMUSG00000028088	0.453131	0.746343	2035	1741	0.086	0.172	0.71991	6.4e-20	1.95e-15	up	Fmo5
Cardiomyocytes	ENSMUSG00000021470	0.293733	0.48338	2035	1741	0.057	0.119	0.718652	2.31e-15	7.04e-11	up	Ercc6l2
Cardiomyocytes	ENSMUSG00000036585	1.93494	3.18	2035	1741	0.274	0.465	0.716743	2.52e-35	7.69e-31	up	Fgf1
Cardiomyocytes	ENSMUSG00000074733	0.831234	1.36262	2035	1741	0.152	0.28	0.713052	1.35e-27	4.12e-23	up	Zfp950
Cardiomyocytes	ENSMUSG00000038256	0.660029	1.08157	2035	1741	0.118	0.238	0.712523	6.37e-29	1.94e-24	up	Bcl9
Cardiomyocytes	ENSMUSG00000036863	0.55264	0.901864	2035	1741	0.109	0.229	0.70657	1.7e-33	5.2e-29	up	Syde2
Cardiomyocytes	ENSMUSG00000039239	0.42482	0.692714	2035	1741	0.075	0.157	0.705408	1.15e-21	3.5e-17	up	Tgfb2
Cardiomyocytes	ENSMUSG00000032656	0.66566	1.08434	2035	1741	0.112	0.198	0.703954	2.51e-16	7.66e-12	up	Marchf3
Cardiomyocytes	ENSMUSG00000015202	0.68004	1.10688	2035	1741	0.113	0.238	0.702808	1.32e-33	4.03e-29	up	Cnksr3
Cardiomyocytes	ENSMUSG00000021713	0.239707	0.389489	2035	1741	0.052	0.113	0.700309	1.05e-17	3.21e-13	up	Ppwd1
Cardiomyocytes	ENSMUSG00000087108	0.818296	1.32924	2035	1741	0.142	0.26	0.699912	4.7e-23	1.43e-18	up	Gm16093
Cardiomyocytes	ENSMUSG00000114005	1.06127	1.72383	2035	1741	0.162	0.275	0.69983	4.12e-18	1.25e-13	up	Gm24474
Cardiomyocytes	ENSMUSG00000062646	0.378214	0.613133	2035	1741	0.083	0.17	0.696997	2.78e-23	8.46e-19	up	Ganc
Cardiomyocytes	ENSMUSG00000047996	0.404106	0.654791	2035	1741	0.068	0.157	0.6963	9.59e-25	2.92e-20	up	Prrg1
Cardiomyocytes	ENSMUSG00000029452	0.280489	0.453664	2035	1741	0.054	0.123	0.693678	4e-21	1.22e-16	up	Tmem116
Cardiomyocytes	ENSMUSG00000033083	2.85156	4.60598	2035	1741	0.331	0.494	0.691755	1.74e-23	5.3e-19	up	Tbc1d4
Cardiomyocytes	ENSMUSG00000056666	0.335251	0.539627	2035	1741	0.066	0.133	0.686723	5.26e-17	1.6e-12	up	Retsat
Cardiomyocytes	ENSMUSG00000056359	0.268728	0.431786	2035	1741	0.059	0.13	0.684171	6.18e-23	1.88e-18	up	D830013O20Rik
Cardiomyocytes	ENSMUSG00000036054	0.335965	0.538125	2035	1741	0.068	0.149	0.67963	1.26e-24	3.84e-20	up	Sugp2
Cardiomyocytes	ENSMUSG00000055923	0.239423	0.383383	2035	1741	0.052	0.125	0.679227	6.37e-27	1.94e-22	up	Aasdh
Cardiomyocytes	ENSMUSG00000013539	1.43465	2.2906	2035	1741	0.232	0.401	0.675026	1.51e-32	4.62e-28	up	Tango2
Cardiomyocytes	ENSMUSG00000021185	0.308817	0.491753	2035	1741	0.063	0.129	0.671182	1.09e-17	3.31e-13	up	Dglucy
Cardiomyocytes	ENSMUSG00000002831	0.784296	1.24889	2035	1741	0.15	0.294	0.671175	7.98e-36	2.43e-31	up	Plin4
Cardiomyocytes	ENSMUSG00000079557	0.623152	0.991253	2035	1741	0.115	0.226	0.669669	4.29e-28	1.31e-23	up	Marchf2
Cardiomyocytes	ENSMUSG00000031767	0.512402	0.812216	2035	1741	0.095	0.205	0.664587	3.68e-35	1.12e-30	up	Nudt7
Cardiomyocytes	ENSMUSG00000000276	0.239373	0.379196	2035	1741	0.047	0.104	0.663685	2.68e-18	8.17e-14	up	Dgke
Cardiomyocytes	ENSMUSG00000062209	5.76585	9.13353	2035	1741	0.362	0.492	0.663639	3.69e-17	1.13e-12	up	Erbb4
Cardiomyocytes	ENSMUSG00000022701	0.265248	0.419458	2035	1741	0.055	0.11	0.661184	6.19e-14	1.89e-09	up	Ccdc191
Cardiomyocytes	ENSMUSG00000062198	0.373394	0.589752	2035	1741	0.075	0.161	0.659411	9.73e-26	2.96e-21	up	2700097O09Rik
Cardiomyocytes	ENSMUSG00000118383	2.97842	4.69446	2035	1741	0.429	0.603	0.656409	7.22e-27	2.2e-22	up	Gm50321
Cardiomyocytes	ENSMUSG00000022270	3.03201	4.77269	2035	1741	0.402	0.576	0.654527	2.19e-25	6.68e-21	up	Retreg1
Cardiomyocytes	ENSMUSG00000021944	1.82647	2.875	2035	1741	0.257	0.423	0.654502	1.19e-28	3.63e-24	up	Gata4
Cardiomyocytes	ENSMUSG00000035992	1.46632	2.30379	2035	1741	0.236	0.406	0.651811	7.74e-33	2.36e-28	up	Fnip1
Cardiomyocytes	ENSMUSG00000045875	0.981412	1.53379	2035	1741	0.15	0.252	0.644165	9.91e-17	3.02e-12	up	Adra1a
Cardiomyocytes	ENSMUSG00000024544	1.04222	1.62856	2035	1741	0.161	0.295	0.643944	1.65e-27	5.02e-23	up	Ldlrad4
Cardiomyocytes	ENSMUSG00000044938	0.703473	1.09882	2035	1741	0.133	0.253	0.64339	7.9e-30	2.41e-25	up	Klhl31
Cardiomyocytes	ENSMUSG00000057147	0.334598	0.522301	2035	1741	0.066	0.125	0.642455	2.15e-13	6.56e-09	up	Dph6
Cardiomyocytes	ENSMUSG00000024335	0.305606	0.47696	2035	1741	0.061	0.114	0.642193	2.06e-12	6.28e-08	up	Brd2
Cardiomyocytes	ENSMUSG00000027016	0.579537	0.903071	2035	1741	0.086	0.168	0.639938	3.88e-18	1.18e-13	up	Zfp385b
Cardiomyocytes	ENSMUSG00000057265	0.226576	0.353033	2035	1741	0.049	0.105	0.639806	3.24e-17	9.88e-13	up	Bbof1
Cardiomyocytes	ENSMUSG00000038260	0.220569	0.343462	2035	1741	0.05	0.105	0.638924	9.85e-17	3e-12	up	Trpm4
Cardiomyocytes	ENSMUSG00000035473	0.502087	0.78162	2035	1741	0.097	0.186	0.63853	1.68e-21	5.14e-17	up	Galm
Cardiomyocytes	ENSMUSG00000028158	0.231352	0.359413	2035	1741	0.043	0.102	0.635552	2.73e-21	8.32e-17	up	Mttp
Cardiomyocytes	ENSMUSG00000004698	1.83521	2.8496	2035	1741	0.233	0.366	0.634815	1.15e-20	3.51e-16	up	Hdac9
Cardiomyocytes	ENSMUSG00000023018	0.263409	0.408216	2035	1741	0.058	0.105	0.632029	2.18e-10	6.65e-06	up	Smarcd1
Cardiomyocytes	ENSMUSG00000034602	0.735559	1.13943	2035	1741	0.138	0.257	0.631396	1.59e-29	4.86e-25	up	Mon2
Cardiomyocytes	ENSMUSG00000063015	0.365656	0.565821	2035	1741	0.07	0.134	0.629858	1.1e-15	3.36e-11	up	Ccni
Cardiomyocytes	ENSMUSG00000046329	0.329783	0.510199	2035	1741	0.067	0.148	0.629543	1.95e-25	5.95e-21	up	Slc25a23
Cardiomyocytes	ENSMUSG00000005501	0.539776	0.834602	2035	1741	0.105	0.207	0.628727	3.07e-28	9.37e-24	up	Usp40
Cardiomyocytes	ENSMUSG00000100457	1.66035	2.56212	2035	1741	0.215	0.358	0.62585	2.59e-24	7.91e-20	up	D830032E09Rik
Cardiomyocytes	ENSMUSG00000085779	1.84077	2.8339	2035	1741	0.281	0.433	0.622479	1.16e-22	3.54e-18	up	Atcayos
Cardiomyocytes	ENSMUSG00000028150	0.280157	0.430523	2035	1741	0.057	0.122	0.619856	1.59e-21	4.86e-17	up	Rorc
Cardiomyocytes	ENSMUSG00000022885	0.288257	0.441925	2035	1741	0.056	0.105	0.616447	4.24e-13	1.29e-08	up	St6gal1
Cardiomyocytes	ENSMUSG00000080727	0.254184	0.389128	2035	1741	0.055	0.123	0.614373	2.41e-24	7.35e-20	up	C920021L13Rik
Cardiomyocytes	ENSMUSG00000087579	1.11237	1.70177	2035	1741	0.153	0.267	0.613406	3.83e-21	1.17e-16	up	Hectd2os
Cardiomyocytes	ENSMUSG00000090889	0.502654	0.768819	2035	1741	0.097	0.195	0.613078	8.13e-27	2.48e-22	up	Gm17428
Cardiomyocytes	ENSMUSG00000022253	0.386245	0.588941	2035	1741	0.075	0.146	0.608607	3.12e-17	9.51e-13	up	Nadk2
Cardiomyocytes	ENSMUSG00000021374	0.313913	0.47775	2035	1741	0.063	0.111	0.605888	1.32e-11	4.03e-07	up	Nup153
Cardiomyocytes	ENSMUSG00000007812	0.253022	0.384763	2035	1741	0.051	0.101	0.604707	3.76e-13	1.15e-08	up	Zfp655
Cardiomyocytes	ENSMUSG00000032418	0.707647	1.07544	2035	1741	0.123	0.231	0.603822	8.51e-27	2.59e-22	up	Me1
Cardiomyocytes	ENSMUSG00000097571	0.280961	0.42611	2035	1741	0.052	0.107	0.600858	4.76e-16	1.45e-11	up	Jpx
Cardiomyocytes	ENSMUSG00000054469	1.11783	1.69159	2035	1741	0.19	0.321	0.597682	2.49e-24	7.6e-20	up	Lclat1
Cardiomyocytes	ENSMUSG00000036990	0.707408	1.07041	2035	1741	0.134	0.262	0.597554	4.77e-36	1.45e-31	up	Otud4
Cardiomyocytes	ENSMUSG00000038072	0.297321	0.449343	2035	1741	0.059	0.117	0.595796	7.74e-15	2.36e-10	up	Galnt11
Cardiomyocytes	ENSMUSG00000058498	0.930599	1.40569	2035	1741	0.165	0.307	0.595052	9.2e-33	2.8e-28	up	Rnf207
Cardiomyocytes	ENSMUSG00000112437	1.57864	2.381	2035	1741	0.212	0.358	0.592888	5e-26	1.52e-21	up	Gm35188
Cardiomyocytes	ENSMUSG00000025348	0.342314	0.516211	2035	1741	0.067	0.131	0.592643	8.75e-18	2.67e-13	up	Itga7
Cardiomyocytes	ENSMUSG00000004637	1.15961	1.74846	2035	1741	0.164	0.262	0.592437	1.65e-14	5.04e-10	up	Wwox
Cardiomyocytes	ENSMUSG00000008976	0.292562	0.441093	2035	1741	0.058	0.115	0.592343	7.35e-16	2.24e-11	up	Gabpa
Cardiomyocytes	ENSMUSG00000043154	2.90643	4.38092	2035	1741	0.376	0.53	0.591987	2.71e-20	8.25e-16	up	Ppp2r3a
Cardiomyocytes	ENSMUSG00000030172	2.03705	3.069	2035	1741	0.279	0.433	0.591292	9.34e-24	2.85e-19	up	Erc1
Cardiomyocytes	ENSMUSG00000004939	0.254472	0.383197	2035	1741	0.056	0.106	0.59058	9.55e-13	2.91e-08	up	Nmrk2
Cardiomyocytes	ENSMUSG00000030279	0.372152	0.559981	2035	1741	0.079	0.156	0.589484	9.22e-21	2.81e-16	up	C2cd5
Cardiomyocytes	ENSMUSG00000031189	0.443035	0.666619	2035	1741	0.064	0.125	0.589441	4.31e-14	1.31e-09	up	Aff2
Cardiomyocytes	ENSMUSG00000000266	0.413481	0.621406	2035	1741	0.069	0.14	0.587714	7.55e-20	2.3e-15	up	Mid2
Cardiomyocytes	ENSMUSG00000074264	0.474336	0.711685	2035	1741	0.09	0.187	0.585328	1.99e-30	6.07e-26	up	Amy1
Cardiomyocytes	ENSMUSG00000035941	0.364598	0.546914	2035	1741	0.074	0.15	0.585008	5.77e-23	1.76e-18	up	Ibtk
Cardiomyocytes	ENSMUSG00000024622	0.285905	0.428678	2035	1741	0.061	0.12	0.584359	7.98e-17	2.43e-12	up	Hmgxb3
Cardiomyocytes	ENSMUSG00000018379	0.64267	0.963306	2035	1741	0.132	0.24	0.583916	6.17e-26	1.88e-21	up	Srsf1
Cardiomyocytes	ENSMUSG00000035696	0.306142	0.458522	2035	1741	0.062	0.115	0.58279	1.03e-13	3.14e-09	up	Rnf38
Cardiomyocytes	ENSMUSG00000036158	1.02485	1.53434	2035	1741	0.154	0.273	0.582204	9.74e-24	2.97e-19	up	Prickle1
Cardiomyocytes	ENSMUSG00000032839	0.293243	0.438627	2035	1741	0.062	0.118	0.580899	1.73e-14	5.29e-10	up	Trpc1
Cardiomyocytes	ENSMUSG00000026853	1.00505	1.5023	2035	1741	0.179	0.307	0.579899	2.81e-27	8.55e-23	up	Crat
Cardiomyocytes	ENSMUSG00000032578	0.465526	0.695621	2035	1741	0.094	0.178	0.57944	8.43e-22	2.57e-17	up	Cish
Cardiomyocytes	ENSMUSG00000025950	0.341311	0.509972	2035	1741	0.064	0.128	0.579333	1.04e-18	3.17e-14	up	Idh1
Cardiomyocytes	ENSMUSG00000022462	2.20117	3.28736	2035	1741	0.315	0.47	0.578658	5.32e-22	1.62e-17	up	Slc38a2
Cardiomyocytes	ENSMUSG00000033799	0.308403	0.460447	2035	1741	0.057	0.129	0.578218	1.16e-25	3.53e-21	up	Tasor2
Cardiomyocytes	ENSMUSG00000113975	0.552509	0.82373	2035	1741	0.096	0.191	0.576174	4.01e-25	1.22e-20	up	Gm36372
Cardiomyocytes	ENSMUSG00000033610	1.21137	1.8054	2035	1741	0.192	0.338	0.575674	1.32e-30	4.02e-26	up	Pank1
Cardiomyocytes	ENSMUSG00000032570	0.796383	1.18581	2035	1741	0.151	0.276	0.574333	9.56e-30	2.91e-25	up	Atp2c1
Cardiomyocytes	ENSMUSG00000028247	0.459989	0.684798	2035	1741	0.088	0.176	0.57408	1.12e-24	3.41e-20	up	Coq3
Cardiomyocytes	ENSMUSG00000026077	0.316015	0.470264	2035	1741	0.059	0.124	0.573479	3.79e-20	1.16e-15	up	Npas2
Cardiomyocytes	ENSMUSG00000026922	0.278897	0.414902	2035	1741	0.052	0.11	0.573037	7.98e-19	2.43e-14	up	Agpat2
Cardiomyocytes	ENSMUSG00000047454	8.4025	12.4943	2035	1741	0.746	0.814	0.572374	1.58e-06	0.0481064	up	Gphn
Cardiomyocytes	ENSMUSG00000026854	0.333777	0.49571	2035	1741	0.07	0.141	0.570615	5e-21	1.53e-16	up	Usp20
Cardiomyocytes	ENSMUSG00000041741	3.91635	5.81542	2035	1741	0.373	0.506	0.570373	2.46e-15	7.5e-11	up	Pde3a
Cardiomyocytes	ENSMUSG00000067369	0.296946	0.440936	2035	1741	0.059	0.114	0.570372	1.28e-14	3.89e-10	up	Trmt2b
Cardiomyocytes	ENSMUSG00000085162	0.946678	1.40482	2035	1741	0.133	0.222	0.569436	1.02e-13	3.1e-09	up	Gm12295
Cardiomyocytes	ENSMUSG00000071540	0.535904	0.795042	2035	1741	0.102	0.186	0.569058	1e-21	3.05e-17	up	3425401B19Rik
Cardiomyocytes	ENSMUSG00000003282	0.292064	0.433209	2035	1741	0.058	0.112	0.56878	2.95e-14	8.99e-10	up	Plag1
Cardiomyocytes	ENSMUSG00000036333	2.34608	3.47743	2035	1741	0.353	0.501	0.567768	4.11e-19	1.25e-14	up	Kidins220
Cardiomyocytes	ENSMUSG00000038068	0.327018	0.483751	2035	1741	0.067	0.13	0.564893	3.62e-16	1.1e-11	up	Rnf144b
Cardiomyocytes	ENSMUSG00000022309	2.66384	3.93989	2035	1741	0.233	0.362	0.564645	8.12e-21	2.48e-16	up	Angpt1
Cardiomyocytes	ENSMUSG00000013495	0.252513	0.372826	2035	1741	0.055	0.115	0.562144	2.03e-19	6.18e-15	up	Tmem175
Cardiomyocytes	ENSMUSG00000029563	0.540205	0.79755	2035	1741	0.085	0.15	0.562067	6.55e-15	2e-10	up	Foxp2
Cardiomyocytes	ENSMUSG00000024507	0.637928	0.940863	2035	1741	0.119	0.226	0.56059	2.51e-28	7.66e-24	up	Hsd17b4
Cardiomyocytes	ENSMUSG00000113586	1.29396	1.90735	2035	1741	0.164	0.296	0.559779	1.87e-27	5.69e-23	up	Gm48606
Cardiomyocytes	ENSMUSG00000049265	1.16351	1.71503	2035	1741	0.202	0.322	0.559751	8.31e-22	2.53e-17	up	Kcnk3
Cardiomyocytes	ENSMUSG00000097442	1.01647	1.49818	2035	1741	0.163	0.296	0.559645	1.18e-29	3.6e-25	up	Gm26632
Cardiomyocytes	ENSMUSG00000060843	18.0172	26.5417	2035	1741	0.545	0.598	0.558888	8.75e-22	2.67e-17	up	Ctnna3
Cardiomyocytes	ENSMUSG00000034621	1.59039	2.34217	2035	1741	0.261	0.406	0.558469	5.03e-23	1.53e-18	up	Gpatch8
Cardiomyocytes	ENSMUSG00000014850	0.290906	0.428157	2035	1741	0.054	0.115	0.557588	3.46e-20	1.06e-15	up	Msh3
Cardiomyocytes	ENSMUSG00000061436	0.952495	1.40174	2035	1741	0.169	0.285	0.557437	3.12e-23	9.5e-19	up	Hipk2
Cardiomyocytes	ENSMUSG00000030556	0.278633	0.409985	2035	1741	0.054	0.109	0.557206	3.8e-17	1.16e-12	up	Lrrc28
Cardiomyocytes	ENSMUSG00000037151	0.436245	0.640978	2035	1741	0.085	0.161	0.555136	1.93e-20	5.88e-16	up	Lrrc20
Cardiomyocytes	ENSMUSG00000110580	0.76837	1.12866	2035	1741	0.141	0.257	0.554738	4.08e-28	1.24e-23	up	D830024N08Rik
Cardiomyocytes	ENSMUSG00000042846	5.41012	7.94532	2035	1741	0.378	0.494	0.554444	4.5e-14	1.37e-09	up	Lrrtm3
Cardiomyocytes	ENSMUSG00000031636	0.5159	0.757383	2035	1741	0.084	0.132	0.553932	2.45e-09	7.46e-05	up	Pdlim3
Cardiomyocytes	ENSMUSG00000011305	0.642086	0.941785	2035	1741	0.11	0.202	0.552631	4.76e-24	1.45e-19	up	Plin5
Cardiomyocytes	ENSMUSG00000049553	0.357247	0.523863	2035	1741	0.07	0.125	0.552266	3.99e-15	1.22e-10	up	Polr1a
Cardiomyocytes	ENSMUSG00000048482	0.28987	0.424915	2035	1741	0.053	0.105	0.551765	5.2e-14	1.59e-09	up	Bdnf
Cardiomyocytes	ENSMUSG00000018995	0.289576	0.423592	2035	1741	0.057	0.115	0.54873	8.31e-19	2.53e-14	up	Nars2
Cardiomyocytes	ENSMUSG00000040029	0.316596	0.463108	2035	1741	0.059	0.12	0.548705	1.53e-19	4.66e-15	up	Ipo8
Cardiomyocytes	ENSMUSG00000021796	2.1557	3.1527	2035	1741	0.29	0.444	0.548435	4.64e-23	1.41e-18	up	Bmpr1a
Cardiomyocytes	ENSMUSG00000032034	0.349368	0.510793	2035	1741	0.064	0.122	0.547992	1.89e-15	5.76e-11	up	Kcnj5
Cardiomyocytes	ENSMUSG00000049537	1.3584	1.9846	2035	1741	0.224	0.365	0.546941	3.08e-24	9.38e-20	up	Tecrl
Cardiomyocytes	ENSMUSG00000064225	0.482785	0.705271	2035	1741	0.089	0.152	0.546799	5.42e-14	1.65e-09	up	Paqr9
Cardiomyocytes	ENSMUSG00000032289	0.485606	0.709096	2035	1741	0.08	0.142	0.546194	8.28e-13	2.52e-08	up	Thsd4
Cardiomyocytes	ENSMUSG00000027510	0.363079	0.529608	2035	1741	0.072	0.15	0.544641	1.19e-25	3.61e-21	up	Rbm38
Cardiomyocytes	ENSMUSG00000053754	0.374993	0.5468	2035	1741	0.073	0.141	0.544148	1.28e-20	3.91e-16	up	Chd8
Cardiomyocytes	ENSMUSG00000052934	0.433292	0.631044	2035	1741	0.083	0.161	0.542402	5.67e-23	1.73e-18	up	Fbxo31
Cardiomyocytes	ENSMUSG00000018428	0.834918	1.21557	2035	1741	0.154	0.263	0.541927	1.08e-24	3.29e-20	up	Akap1
Cardiomyocytes	ENSMUSG00000049550	3.29812	4.80051	2035	1741	0.435	0.594	0.541541	1.85e-21	5.63e-17	up	Clip1
Cardiomyocytes	ENSMUSG00000024535	0.361461	0.526107	2035	1741	0.07	0.12	0.541515	5.38e-12	1.64e-07	up	Snx24
Cardiomyocytes	ENSMUSG00000073147	0.872131	1.26744	2035	1741	0.157	0.277	0.539307	3.32e-28	1.01e-23	up	5031425E22Rik
Cardiomyocytes	ENSMUSG00000077450	0.587566	0.853646	2035	1741	0.112	0.183	0.538888	6.61e-14	2.02e-09	up	Rab11b
Cardiomyocytes	ENSMUSG00000027692	1.59656	2.31889	2035	1741	0.221	0.35	0.538464	2.21e-21	6.73e-17	up	Tnik
Cardiomyocytes	ENSMUSG00000097101	0.383018	0.55606	2035	1741	0.072	0.149	0.537829	6.39e-23	1.95e-18	up	1810034E14Rik
Cardiomyocytes	ENSMUSG00000018377	0.646038	0.937813	2035	1741	0.127	0.228	0.537682	1.74e-25	5.3e-21	up	Vezf1
Cardiomyocytes	ENSMUSG00000043456	0.407114	0.590499	2035	1741	0.077	0.128	0.536502	1.45e-10	4.42e-06	up	Zfp536
Cardiomyocytes	ENSMUSG00000027961	1.14427	1.65815	2035	1741	0.201	0.343	0.535148	4.89e-33	1.49e-28	up	Lrrc39
Cardiomyocytes	ENSMUSG00000032897	1.96841	2.84578	2035	1741	0.28	0.42	0.531793	4.17e-20	1.27e-15	up	Nfyc
Cardiomyocytes	ENSMUSG00000044991	1.34339	1.94018	2035	1741	0.19	0.318	0.530314	7.76e-25	2.36e-20	up	Shld1
Cardiomyocytes	ENSMUSG00000062110	0.354535	0.511486	2035	1741	0.064	0.125	0.528764	1.22e-17	3.72e-13	up	Scfd2
Cardiomyocytes	ENSMUSG00000028634	0.587165	0.847077	2035	1741	0.105	0.168	0.528729	1.11e-11	3.39e-07	up	Hivep3
Cardiomyocytes	ENSMUSG00000039414	0.389684	0.561985	2035	1741	0.075	0.155	0.528227	1.81e-26	5.52e-22	up	Heatr5b
Cardiomyocytes	ENSMUSG00000086859	0.223307	0.321986	2035	1741	0.045	0.103	0.527973	1.37e-22	4.17e-18	up	Snhg20
Cardiomyocytes	ENSMUSG00000014503	0.781349	1.12628	2035	1741	0.143	0.265	0.527533	1.45e-30	4.41e-26	up	Pkd2l2
Cardiomyocytes	ENSMUSG00000027809	1.78086	2.5661	2035	1741	0.288	0.441	0.527003	1.53e-25	4.68e-21	up	Etfdh
Cardiomyocytes	ENSMUSG00000022194	0.371135	0.534688	2035	1741	0.078	0.153	0.526755	1.15e-23	3.51e-19	up	Pabpn1
Cardiomyocytes	ENSMUSG00000028086	1.30118	1.87443	2035	1741	0.21	0.351	0.526627	1.64e-28	5.01e-24	up	Fbxw7
Cardiomyocytes	ENSMUSG00000056153	0.290631	0.417445	2035	1741	0.055	0.119	0.5224	3.57e-23	1.09e-18	up	Socs6
Cardiomyocytes	ENSMUSG00000046034	1.17397	1.68619	2035	1741	0.191	0.315	0.522378	1.44e-23	4.38e-19	up	Otulin
Cardiomyocytes	ENSMUSG00000053199	0.525126	0.753183	2035	1741	0.098	0.194	0.520337	1.17e-29	3.55e-25	up	Arhgap20
Cardiomyocytes	ENSMUSG00000040268	0.402017	0.576558	2035	1741	0.084	0.144	0.520211	2.04e-13	6.2e-09	up	Plekha1
Cardiomyocytes	ENSMUSG00000029629	0.960525	1.37646	2035	1741	0.171	0.283	0.519067	9.26e-25	2.82e-20	up	Phf14
Cardiomyocytes	ENSMUSG00000025766	0.350287	0.501717	2035	1741	0.068	0.133	0.518337	1.1e-18	3.36e-14	up	D3Ertd751e
Cardiomyocytes	ENSMUSG00000102805	2.75106	3.93823	2035	1741	0.3	0.451	0.517559	1.55e-22	4.72e-18	up	Gm37240
Cardiomyocytes	ENSMUSG00000079509	0.471106	0.673025	2035	1741	0.086	0.164	0.514608	7.51e-22	2.29e-17	up	Zfx
Cardiomyocytes	ENSMUSG00000040455	0.329091	0.46984	2035	1741	0.064	0.123	0.513683	3.72e-17	1.13e-12	up	Usp45
Cardiomyocytes	ENSMUSG00000035629	0.386181	0.551343	2035	1741	0.075	0.155	0.513674	3.05e-27	9.3e-23	up	Rubcn
Cardiomyocytes	ENSMUSG00000031337	0.466068	0.665167	2035	1741	0.08	0.166	0.513174	3.96e-26	1.21e-21	up	Mtm1
Cardiomyocytes	ENSMUSG00000023826	3.78579	5.39997	2035	1741	0.35	0.472	0.512356	9.04e-14	2.75e-09	up	Prkn
Cardiomyocytes	ENSMUSG00000024617	0.419583	0.598066	2035	1741	0.089	0.157	0.511351	1.24e-16	3.79e-12	up	Camk2a
Cardiomyocytes	ENSMUSG00000086527	0.247648	0.352719	2035	1741	0.051	0.111	0.510232	2.78e-23	8.49e-19	up	Gm15856
Cardiomyocytes	ENSMUSG00000028834	1.80424	2.56967	2035	1741	0.274	0.426	0.51019	7.35e-27	2.24e-22	up	Trim63
Cardiomyocytes	ENSMUSG00000032624	0.387386	0.551212	2035	1741	0.076	0.129	0.508835	7.5e-13	2.29e-08	up	Eml4
Cardiomyocytes	ENSMUSG00000069601	3.63694	5.17244	2035	1741	0.359	0.504	0.50812	9.51e-19	2.9e-14	up	Ank3
Cardiomyocytes	ENSMUSG00000118193	0.53726	0.763606	2035	1741	0.104	0.188	0.507208	3.44e-21	1.05e-16	up	Arhgap26
Cardiomyocytes	ENSMUSG00000035900	0.368114	0.522934	2035	1741	0.072	0.137	0.506474	3.08e-19	9.38e-15	up	Gramd4
Cardiomyocytes	ENSMUSG00000075289	0.320921	0.45566	2035	1741	0.068	0.141	0.505741	2.21e-26	6.74e-22	up	Carns1
Cardiomyocytes	ENSMUSG00000033991	0.356803	0.506486	2035	1741	0.07	0.129	0.505394	2.73e-15	8.31e-11	up	Ttc37
Cardiomyocytes	ENSMUSG00000031616	0.951907	1.3502	2035	1741	0.143	0.257	0.504277	1.17e-24	3.56e-20	up	Ednra
Cardiomyocytes	ENSMUSG00000037949	0.357713	0.50734	2035	1741	0.066	0.122	0.504151	1.65e-16	5.03e-12	up	Ano10
Cardiomyocytes	ENSMUSG00000025958	0.612099	0.868049	2035	1741	0.114	0.194	0.504012	6.83e-17	2.08e-12	up	Creb1
Cardiomyocytes	ENSMUSG00000041775	0.395592	0.560986	2035	1741	0.084	0.16	0.503953	4.34e-23	1.32e-18	up	Mapk1ip1
Cardiomyocytes	ENSMUSG00000035064	0.394793	0.55957	2035	1741	0.076	0.141	0.503222	1.12e-18	3.4e-14	up	Eef2k
Cardiomyocytes	ENSMUSG00000029780	0.479403	0.679072	2035	1741	0.093	0.16	0.502326	2.24e-16	6.83e-12	up	Nt5c3
Cardiomyocytes	ENSMUSG00000061589	0.715393	1.01313	2035	1741	0.145	0.25	0.502015	4.51e-25	1.37e-20	up	Dot1l
Cardiomyocytes	ENSMUSG00000095438	0.787757	1.11497	2035	1741	0.141	0.267	0.501185	2.58e-35	7.86e-31	up	Mir133a-1hg
Cardiomyocytes	ENSMUSG00000024501	0.359144	0.508321	2035	1741	0.059	0.101	0.501177	5.75e-08	0.00175247	up	Dpysl3
Cardiomyocytes	ENSMUSG00000036528	0.628816	0.889817	2035	1741	0.114	0.217	0.500872	3.21e-30	9.79e-26	up	Ppfibp2
Cardiomyocytes	ENSMUSG00000028565	5.48966	7.75601	2035	1741	0.503	0.604	0.498598	5.14e-11	1.57e-06	up	Nfia
Cardiomyocytes	ENSMUSG00000021112	0.657593	0.928549	2035	1741	0.121	0.217	0.497783	4.99e-23	1.52e-18	up	Mpp5
Cardiomyocytes	ENSMUSG00000036264	0.405093	0.57163	2035	1741	0.056	0.106	0.49683	1.43e-12	4.35e-08	up	Fstl4
Cardiomyocytes	ENSMUSG00000048582	0.307227	0.433492	2035	1741	0.059	0.115	0.496701	2.49e-16	7.6e-12	up	Gja3
Cardiomyocytes	ENSMUSG00000021579	0.442199	0.623327	2035	1741	0.09	0.15	0.495292	2.63e-13	8.01e-09	up	Lrrc14b
Cardiomyocytes	ENSMUSG00000025509	1.05287	1.48365	2035	1741	0.176	0.255	0.494828	4.03e-11	1.23e-06	up	Pnpla2
Cardiomyocytes	ENSMUSG00000027708	0.403138	0.568029	2035	1741	0.08	0.154	0.49469	2.1e-21	6.39e-17	up	Dcun1d1
Cardiomyocytes	ENSMUSG00000020074	1.01155	1.42505	2035	1741	0.174	0.305	0.494449	3.99e-33	1.22e-28	up	Ccar1
Cardiomyocytes	ENSMUSG00000015745	0.378527	0.532838	2035	1741	0.07	0.126	0.493301	2.78e-14	8.48e-10	up	Plekho1
Cardiomyocytes	ENSMUSG00000029823	5.84816	8.23143	2035	1741	0.572	0.648	0.49316	2e-21	6.1e-17	up	Luc7l2
Cardiomyocytes	ENSMUSG00000032413	0.3051	0.429117	2035	1741	0.06	0.119	0.492089	1.52e-18	4.62e-14	up	Rasa2
Cardiomyocytes	ENSMUSG00000064061	0.267978	0.376569	2035	1741	0.05	0.102	0.490799	1.79e-17	5.46e-13	up	Dzip3
Cardiomyocytes	ENSMUSG00000086938	0.432124	0.607071	2035	1741	0.089	0.17	0.490419	2e-25	6.09e-21	up	4930481A15Rik
Cardiomyocytes	ENSMUSG00000046709	0.501055	0.70322	2035	1741	0.084	0.145	0.489008	3.08e-15	9.38e-11	up	Mapk10
Cardiomyocytes	ENSMUSG00000027652	0.532702	0.747528	2035	1741	0.097	0.17	0.488799	2.11e-17	6.44e-13	up	Ralgapb
Cardiomyocytes	ENSMUSG00000025911	0.680021	0.953315	2035	1741	0.126	0.231	0.487374	5.96e-30	1.82e-25	up	Adhfe1
Cardiomyocytes	ENSMUSG00000034157	0.445986	0.625076	2035	1741	0.095	0.162	0.487032	4.13e-16	1.26e-11	up	Cipc
Cardiomyocytes	ENSMUSG00000012117	0.281023	0.393797	2035	1741	0.057	0.109	0.486766	4.22e-15	1.28e-10	up	Dhdds
Cardiomyocytes	ENSMUSG00000034820	0.352066	0.493099	2035	1741	0.07	0.122	0.486029	1.07e-13	3.27e-09	up	Cpsf7
Cardiomyocytes	ENSMUSG00000028607	0.731252	1.02359	2035	1741	0.127	0.207	0.485202	2.7e-17	8.23e-13	up	Cpt2
Cardiomyocytes	ENSMUSG00000020137	0.395026	0.552935	2035	1741	0.084	0.15	0.485162	7.28e-19	2.22e-14	up	Thap2
Cardiomyocytes	ENSMUSG00000040761	0.460801	0.644894	2035	1741	0.089	0.156	0.484918	7.57e-17	2.31e-12	up	Spen
Cardiomyocytes	ENSMUSG00000000441	0.899878	1.25899	2035	1741	0.166	0.286	0.484469	1.8e-30	5.48e-26	up	Raf1
Cardiomyocytes	ENSMUSG00000027104	0.527048	0.7372	2035	1741	0.104	0.186	0.484122	1.44e-23	4.38e-19	up	Atf2
Cardiomyocytes	ENSMUSG00000026017	0.289408	0.404789	2035	1741	0.056	0.118	0.484065	3.89e-22	1.19e-17	up	Carf
Cardiomyocytes	ENSMUSG00000034518	0.330258	0.461899	2035	1741	0.067	0.115	0.483982	1.06e-11	3.23e-07	up	Hmgxb4
Cardiomyocytes	ENSMUSG00000031060	0.360874	0.504501	2035	1741	0.074	0.129	0.483362	3.61e-14	1.1e-09	up	Rbm10
Cardiomyocytes	ENSMUSG00000022677	0.278004	0.388258	2035	1741	0.054	0.111	0.481908	4.35e-20	1.33e-15	up	Fopnl
Cardiomyocytes	ENSMUSG00000041258	0.390414	0.545247	2035	1741	0.078	0.156	0.481903	5.09e-26	1.55e-21	up	Zfp236
Cardiomyocytes	ENSMUSG00000019988	0.434444	0.606357	2035	1741	0.08	0.146	0.480997	3.07e-17	9.36e-13	up	Nedd1
Cardiomyocytes	ENSMUSG00000033871	2.1646	3.02037	2035	1741	0.285	0.441	0.480628	5.96e-27	1.82e-22	up	Ppargc1b
Cardiomyocytes	ENSMUSG00000040327	0.253637	0.353743	2035	1741	0.049	0.101	0.479936	1.45e-18	4.42e-14	up	Cul9
Cardiomyocytes	ENSMUSG00000036218	1.68419	2.34731	2035	1741	0.143	0.245	0.478957	2.17e-20	6.61e-16	up	Pdzrn4
Cardiomyocytes	ENSMUSG00000023805	0.594851	0.828799	2035	1741	0.114	0.214	0.478493	6.16e-30	1.88e-25	up	Synj2
Cardiomyocytes	ENSMUSG00000041297	1.16598	1.62398	2035	1741	0.198	0.319	0.477987	9.45e-25	2.88e-20	up	Cdk13
Cardiomyocytes	ENSMUSG00000109754	0.498853	0.694713	2035	1741	0.095	0.173	0.477802	1.66e-20	5.05e-16	up	Gm39214
Cardiomyocytes	ENSMUSG00000036225	0.290362	0.404335	2035	1741	0.06	0.111	0.477699	1.14e-13	3.48e-09	up	Kctd1
Cardiomyocytes	ENSMUSG00000055723	0.424634	0.591154	2035	1741	0.081	0.145	0.477314	2.43e-17	7.41e-13	up	Rras2
Cardiomyocytes	ENSMUSG00000041921	1.02848	1.43121	2035	1741	0.186	0.332	0.476721	1.79e-38	5.44e-34	up	Metap1d
Cardiomyocytes	ENSMUSG00000050211	0.404327	0.562384	2035	1741	0.087	0.153	0.476034	5.95e-17	1.81e-12	up	Pla2g4e
Cardiomyocytes	ENSMUSG00000040111	1.43371	1.99273	2035	1741	0.193	0.308	0.474992	1.69e-20	5.14e-16	up	Gramd1b
Cardiomyocytes	ENSMUSG00000048490	0.894659	1.24329	2035	1741	0.158	0.259	0.474747	7.91e-22	2.41e-17	up	Nrip1
Cardiomyocytes	ENSMUSG00000071317	0.650493	0.903849	2035	1741	0.121	0.201	0.47455	1.29e-19	3.94e-15	up	Bves
Cardiomyocytes	ENSMUSG00000050199	0.539407	0.749164	2035	1741	0.088	0.175	0.473908	6.24e-23	1.9e-18	up	Lgr4
Cardiomyocytes	ENSMUSG00000047141	0.421908	0.585749	2035	1741	0.081	0.149	0.473354	4.2e-19	1.28e-14	up	Zfp654
Cardiomyocytes	ENSMUSG00000052917	0.73721	1.02292	2035	1741	0.13	0.234	0.472547	9.49e-29	2.89e-24	up	Senp7
Cardiomyocytes	ENSMUSG00000022019	0.557292	0.772835	2035	1741	0.103	0.193	0.471727	2.17e-25	6.63e-21	up	Tdrd3
Cardiomyocytes	ENSMUSG00000022858	0.856287	1.18693	2035	1741	0.168	0.263	0.471073	1.99e-18	6.05e-14	up	Tra2b
Cardiomyocytes	ENSMUSG00000028601	0.276687	0.382997	2035	1741	0.062	0.121	0.469078	1.23e-19	3.74e-15	up	Echdc2
Cardiomyocytes	ENSMUSG00000045205	0.287116	0.397386	2035	1741	0.057	0.101	0.468908	1.63e-12	4.97e-08	up	Dpy19l4
Cardiomyocytes	ENSMUSG00000027698	3.31332	4.58437	2035	1741	0.41	0.551	0.468448	2.37e-19	7.23e-15	up	Nceh1
Cardiomyocytes	ENSMUSG00000047022	0.284119	0.393085	2035	1741	0.052	0.103	0.468347	7.06e-16	2.15e-11	up	Mipol1
Cardiomyocytes	ENSMUSG00000029217	0.420639	0.581573	2035	1741	0.079	0.148	0.467378	5.54e-21	1.69e-16	up	Tec
Cardiomyocytes	ENSMUSG00000041268	0.44211	0.611257	2035	1741	0.09	0.163	0.467373	5.25e-21	1.6e-16	up	Dmxl2
Cardiomyocytes	ENSMUSG00000038132	3.35942	4.64413	2035	1741	0.422	0.55	0.467197	2.53e-14	7.71e-10	up	Rbm24
Cardiomyocytes	ENSMUSG00000030306	1.47296	2.03479	2035	1741	0.216	0.335	0.466163	1.15e-22	3.51e-18	up	Tmtc1
Cardiomyocytes	ENSMUSG00000029684	0.774759	1.06979	2035	1741	0.142	0.206	0.465502	8.72e-12	2.66e-07	up	Wasl
Cardiomyocytes	ENSMUSG00000038594	4.30811	5.94011	2035	1741	0.442	0.534	0.463436	2.97e-10	9.06e-06	up	Cep85l
Cardiomyocytes	ENSMUSG00000025938	0.348595	0.480606	2035	1741	0.065	0.126	0.463301	9.91e-18	3.02e-13	up	Slco5a1
Cardiomyocytes	ENSMUSG00000063428	0.465802	0.641932	2035	1741	0.089	0.159	0.462703	3.95e-17	1.2e-12	up	Ddo
Cardiomyocytes	ENSMUSG00000055065	1.05233	1.45017	2035	1741	0.193	0.311	0.462634	3.79e-26	1.15e-21	up	Ddx17
Cardiomyocytes	ENSMUSG00000026885	0.350031	0.482237	2035	1741	0.065	0.125	0.462263	5.39e-18	1.64e-13	up	Ttll11
Cardiomyocytes	ENSMUSG00000015214	0.297701	0.410077	2035	1741	0.06	0.108	0.462028	1.02e-12	3.11e-08	up	Mtmr1
Cardiomyocytes	ENSMUSG00000034218	0.231268	0.318228	2035	1741	0.049	0.101	0.460491	7.4e-19	2.26e-14	up	Atm
Cardiomyocytes	ENSMUSG00000112925	0.293896	0.403765	2035	1741	0.059	0.119	0.45821	6.49e-21	1.98e-16	up	Gm31763
Cardiomyocytes	ENSMUSG00000027634	0.314801	0.432375	2035	1741	0.068	0.129	0.457844	1.67e-19	5.08e-15	up	Ndrg3
Cardiomyocytes	ENSMUSG00000035283	0.413497	0.56773	2035	1741	0.082	0.155	0.457327	1.5e-21	4.56e-17	up	Adrb1
Cardiomyocytes	ENSMUSG00000045098	0.541923	0.743475	2035	1741	0.104	0.173	0.456197	6.53e-17	1.99e-12	up	Kmt5b
Cardiomyocytes	ENSMUSG00000050064	0.54551	0.74833	2035	1741	0.102	0.18	0.456069	5.81e-21	1.77e-16	up	Zfp697
Cardiomyocytes	ENSMUSG00000020385	0.779324	1.06877	2035	1741	0.154	0.272	0.455663	1.36e-29	4.14e-25	up	Clk4
Cardiomyocytes	ENSMUSG00000030605	0.599014	0.821439	2035	1741	0.114	0.168	0.455563	1.49e-09	4.55e-05	up	Mfge8
Cardiomyocytes	ENSMUSG00000042647	0.308877	0.42355	2035	1741	0.062	0.105	0.455501	1.07e-10	3.26e-06	up	Acad12
Cardiomyocytes	ENSMUSG00000043384	0.485585	0.665731	2035	1741	0.095	0.159	0.455217	2.54e-15	7.75e-11	up	Gprasp1
Cardiomyocytes	ENSMUSG00000033590	0.250626	0.343468	2035	1741	0.052	0.108	0.454643	1.45e-20	4.41e-16	up	Myo5c
Cardiomyocytes	ENSMUSG00000073535	0.469864	0.642705	2035	1741	0.088	0.16	0.451914	6.77e-22	2.06e-17	up	Gm5532
Cardiomyocytes	ENSMUSG00000025656	0.334057	0.45681	2035	1741	0.065	0.107	0.451501	9.03e-10	2.75e-05	up	Arhgef9
Cardiomyocytes	ENSMUSG00000041957	1.95233	2.6692	2035	1741	0.286	0.423	0.451211	3.26e-21	9.92e-17	up	Pkp2
Cardiomyocytes	ENSMUSG00000067081	0.63204	0.863783	2035	1741	0.113	0.203	0.450652	1.1e-22	3.36e-18	up	Asb18
Cardiomyocytes	ENSMUSG00000052852	0.742998	1.0152	2035	1741	0.137	0.23	0.450337	8.91e-22	2.71e-17	up	Reep1
Cardiomyocytes	ENSMUSG00000026858	0.842112	1.14985	2035	1741	0.161	0.268	0.449358	3.95e-26	1.2e-21	up	Miga2
Cardiomyocytes	ENSMUSG00000025059	0.827112	1.12934	2035	1741	0.143	0.25	0.449331	1.96e-26	5.99e-22	up	Gk
Cardiomyocytes	ENSMUSG00000029470	0.312454	0.426559	2035	1741	0.066	0.114	0.449103	6.16e-13	1.88e-08	up	P2rx4
Cardiomyocytes	ENSMUSG00000043336	6.76001	9.22662	2035	1741	0.482	0.603	0.448776	6.27e-13	1.91e-08	up	Filip1l
Cardiomyocytes	ENSMUSG00000056486	0.34894	0.476069	2035	1741	0.067	0.127	0.448192	3.91e-19	1.19e-14	up	Chn1
Cardiomyocytes	ENSMUSG00000097537	0.325897	0.444524	2035	1741	0.065	0.115	0.447845	1.22e-13	3.71e-09	up	2610020C07Rik
Cardiomyocytes	ENSMUSG00000019927	0.335235	0.456435	2035	1741	0.066	0.111	0.445237	4.65e-12	1.42e-07	up	Ube2d1
Cardiomyocytes	ENSMUSG00000001366	0.448852	0.611103	2035	1741	0.091	0.163	0.445175	8.21e-21	2.5e-16	up	Fbxo9
Cardiomyocytes	ENSMUSG00000055932	1.49411	2.03273	2035	1741	0.232	0.364	0.444135	2.39e-27	7.29e-23	up	Fto
Cardiomyocytes	ENSMUSG00000022210	0.563355	0.766071	2035	1741	0.106	0.165	0.443433	6.28e-12	1.91e-07	up	Dhrs4
Cardiomyocytes	ENSMUSG00000041695	0.37554	0.510628	2035	1741	0.074	0.135	0.443305	2.53e-18	7.71e-14	up	Kcnj2
Cardiomyocytes	ENSMUSG00000045201	1.08649	1.47692	2035	1741	0.142	0.246	0.442918	3.48e-24	1.06e-19	up	Lrrc3b
Cardiomyocytes	ENSMUSG00000057719	0.383021	0.520305	2035	1741	0.064	0.123	0.441931	2.61e-17	7.97e-13	up	Sh3rf2
Cardiomyocytes	ENSMUSG00000039166	0.44274	0.601098	2035	1741	0.083	0.148	0.44114	1.42e-19	4.34e-15	up	Akap7
Cardiomyocytes	ENSMUSG00000038344	0.381593	0.517997	2035	1741	0.077	0.132	0.440909	7.58e-14	2.31e-09	up	Txlng
Cardiomyocytes	ENSMUSG00000020435	0.444754	0.603352	2035	1741	0.08	0.154	0.439991	4.23e-21	1.29e-16	up	Osbp2
Cardiomyocytes	ENSMUSG00000023088	0.445924	0.604802	2035	1741	0.089	0.149	0.439666	2.66e-15	8.1e-11	up	Abcc1
Cardiomyocytes	ENSMUSG00000006800	0.377348	0.511667	2035	1741	0.071	0.119	0.43931	1.67e-11	5.1e-07	up	Sulf2
Cardiomyocytes	ENSMUSG00000042625	0.51691	0.700736	2035	1741	0.102	0.179	0.438958	9.09e-22	2.77e-17	up	Safb2
Cardiomyocytes	ENSMUSG00000027499	1.11269	1.50807	2035	1741	0.186	0.3	0.438653	1.23e-25	3.75e-21	up	Pkia
Cardiomyocytes	ENSMUSG00000028518	1.48406	2.01078	2035	1741	0.232	0.371	0.438207	2.87e-29	8.75e-25	up	Prkaa2
Cardiomyocytes	ENSMUSG00000018372	0.247753	0.335421	2035	1741	0.053	0.105	0.43707	3.2e-17	9.75e-13	up	Cep95
Cardiomyocytes	ENSMUSG00000056211	1.49676	2.02494	2035	1741	0.242	0.38	0.436041	1.01e-27	3.09e-23	up	R3hdm1
Cardiomyocytes	ENSMUSG00000018411	1.01154	1.36839	2035	1741	0.172	0.285	0.435931	4.07e-25	1.24e-20	up	Mapt
Cardiomyocytes	ENSMUSG00000056342	1.92292	2.60077	2035	1741	0.307	0.449	0.43564	5.68e-24	1.73e-19	up	Usp34
Cardiomyocytes	ENSMUSG00000029229	0.356179	0.481624	2035	1741	0.067	0.111	0.435305	9.72e-11	2.96e-06	up	Chic2
Cardiomyocytes	ENSMUSG00000022016	0.598049	0.808593	2035	1741	0.113	0.2	0.43515	1.96e-24	5.98e-20	up	Akap11
Cardiomyocytes	ENSMUSG00000033565	1.65416	2.23615	2035	1741	0.264	0.383	0.434922	5.04e-20	1.53e-15	up	Rbfox2
Cardiomyocytes	ENSMUSG00000025791	0.867264	1.17234	2035	1741	0.16	0.258	0.434851	3.44e-22	1.05e-17	up	Pgm1
Cardiomyocytes	ENSMUSG00000010110	0.32561	0.439866	2035	1741	0.067	0.107	0.43392	8.14e-10	2.48e-05	up	Stx5a
Cardiomyocytes	ENSMUSG00000051510	0.270221	0.364852	2035	1741	0.056	0.103	0.433172	1.39e-14	4.24e-10	up	Mafg
Cardiomyocytes	ENSMUSG00000025607	0.549139	0.741309	2035	1741	0.108	0.169	0.432904	8.22e-14	2.5e-09	up	Copg2
Cardiomyocytes	ENSMUSG00000005698	0.531011	0.716141	2035	1741	0.102	0.18	0.431502	7.64e-22	2.33e-17	up	Ctcf
Cardiomyocytes	ENSMUSG00000030002	0.832433	1.12196	2035	1741	0.162	0.273	0.430614	3.18e-28	9.69e-24	up	Dusp11
Cardiomyocytes	ENSMUSG00000040022	0.527596	0.711045	2035	1741	0.097	0.188	0.430506	1.26e-30	3.84e-26	up	Rab11fip2
Cardiomyocytes	ENSMUSG00000037940	2.52943	3.40853	2035	1741	0.312	0.441	0.43034	2.36e-17	7.2e-13	up	Inpp4b
Cardiomyocytes	ENSMUSG00000031109	0.784186	1.05558	2035	1741	0.115	0.203	0.428775	1.33e-22	4.07e-18	up	Enox2
Cardiomyocytes	ENSMUSG00000005373	0.362847	0.488236	2035	1741	0.076	0.136	0.428217	2.24e-17	6.84e-13	up	Mlxipl
Cardiomyocytes	ENSMUSG00000023277	0.729476	0.981523	2035	1741	0.134	0.222	0.428162	6.03e-23	1.84e-18	up	Twf2
Cardiomyocytes	ENSMUSG00000056899	3.76686	5.06785	2035	1741	0.343	0.464	0.428013	1.61e-13	4.91e-09	up	Immp2l
Cardiomyocytes	ENSMUSG00000028484	0.467511	0.628566	2035	1741	0.093	0.146	0.427065	3.52e-11	1.07e-06	up	Psip1
Cardiomyocytes	ENSMUSG00000051586	2.01226	2.70482	2035	1741	0.298	0.437	0.426715	1.72e-22	5.25e-18	up	Mical3
Cardiomyocytes	ENSMUSG00000042680	1.63586	2.19764	2035	1741	0.221	0.35	0.42591	7.52e-23	2.29e-18	up	Garem1
Cardiomyocytes	ENSMUSG00000003810	3.77734	5.07392	2035	1741	0.414	0.532	0.425731	2.58e-12	7.88e-08	up	Mast2
Cardiomyocytes	ENSMUSG00000047045	0.516269	0.692327	2035	1741	0.085	0.15	0.423331	1.41e-17	4.31e-13	up	Tmem164
Cardiomyocytes	ENSMUSG00000032495	2.9905	4.00892	2035	1741	0.395	0.523	0.422827	8.41e-15	2.56e-10	up	Lrrc2
Cardiomyocytes	ENSMUSG00000020628	0.316453	0.424118	2035	1741	0.064	0.11	0.422472	3.79e-12	1.16e-07	up	Trappc12
Cardiomyocytes	ENSMUSG00000067713	0.441233	0.591315	2035	1741	0.085	0.14	0.422387	5.3e-13	1.62e-08	up	Prkag1
Cardiomyocytes	ENSMUSG00000039801	0.321472	0.430761	2035	1741	0.064	0.106	0.422192	5.74e-11	1.75e-06	up	Cplane1
Cardiomyocytes	ENSMUSG00000040350	0.456067	0.610905	2035	1741	0.088	0.163	0.421702	5.13e-23	1.56e-18	up	Trim7
Cardiomyocytes	ENSMUSG00000027109	0.536308	0.717944	2035	1741	0.099	0.162	0.420808	5.7e-15	1.74e-10	up	Sp3
Cardiomyocytes	ENSMUSG00000057406	0.341373	0.456951	2035	1741	0.066	0.128	0.420691	1.13e-19	3.45e-15	up	Nsd2
Cardiomyocytes	ENSMUSG00000028348	1.16318	1.5564	2035	1741	0.199	0.312	0.420138	6.35e-23	1.93e-18	up	Cavin4
Cardiomyocytes	ENSMUSG00000015843	0.365799	0.489403	2035	1741	0.072	0.133	0.41997	3.54e-20	1.08e-15	up	Rxrg
Cardiomyocytes	ENSMUSG00000031508	0.578994	0.774455	2035	1741	0.12	0.212	0.419634	3.18e-26	9.69e-22	up	Ankrd10
Cardiomyocytes	ENSMUSG00000031134	0.426822	0.570533	2035	1741	0.087	0.15	0.418674	4.92e-17	1.5e-12	up	Rbmx
Cardiomyocytes	ENSMUSG00000021929	0.633893	0.846975	2035	1741	0.12	0.193	0.418079	2.84e-17	8.65e-13	up	Kpna3
Cardiomyocytes	ENSMUSG00000024236	4.16799	5.56567	2035	1741	0.487	0.62	0.417206	2.48e-15	7.56e-11	up	Svil
Cardiomyocytes	ENSMUSG00000015932	1.28847	1.72039	2035	1741	0.211	0.325	0.417073	9.15e-23	2.79e-18	up	Dstn
Cardiomyocytes	ENSMUSG00000020747	0.496278	0.662633	2035	1741	0.1	0.166	0.417061	1.17e-17	3.56e-13	up	Tmem94
Cardiomyocytes	ENSMUSG00000026004	1.64088	2.19053	2035	1741	0.236	0.356	0.416809	2.75e-19	8.39e-15	up	Kansl1l
Cardiomyocytes	ENSMUSG00000035437	0.767366	1.02417	2035	1741	0.135	0.241	0.416465	8.21e-30	2.5e-25	up	Rabgap1
Cardiomyocytes	ENSMUSG00000042444	0.586264	0.781669	2035	1741	0.109	0.184	0.415006	4.38e-20	1.34e-15	up	Mindy2
Cardiomyocytes	ENSMUSG00000066406	2.86653	3.8217	2035	1741	0.365	0.493	0.414908	9.18e-18	2.8e-13	up	Akap13
Cardiomyocytes	ENSMUSG00000025269	0.776322	1.03449	2035	1741	0.106	0.195	0.414193	4.29e-19	1.31e-14	up	Apex2
Cardiomyocytes	ENSMUSG00000053205	0.284103	0.37856	2035	1741	0.059	0.111	0.414109	7.68e-18	2.34e-13	up	Styx
Cardiomyocytes	ENSMUSG00000066306	0.623205	0.829952	2035	1741	0.121	0.182	0.413322	1.92e-12	5.86e-08	up	Numa1
Cardiomyocytes	ENSMUSG00000049421	0.344481	0.458727	2035	1741	0.069	0.132	0.413212	1.2e-21	3.65e-17	up	Zfp260
Cardiomyocytes	ENSMUSG00000053553	0.283615	0.377652	2035	1741	0.057	0.112	0.413124	2.3e-19	7.02e-15	up	3110082I17Rik
Cardiomyocytes	ENSMUSG00000042508	0.355789	0.473481	2035	1741	0.068	0.124	0.412285	3.67e-17	1.12e-12	up	Dmtf1
Cardiomyocytes	ENSMUSG00000005686	0.285083	0.379302	2035	1741	0.057	0.102	0.411967	3.15e-13	9.59e-09	up	Ampd3
Cardiomyocytes	ENSMUSG00000030089	0.399548	0.53154	2035	1741	0.081	0.138	0.411809	2.97e-14	9.06e-10	up	Slc41a3
Cardiomyocytes	ENSMUSG00000029804	0.582448	0.774745	2035	1741	0.113	0.213	0.411592	1.32e-31	4.02e-27	up	Herc3
Cardiomyocytes	ENSMUSG00000035296	1.91415	2.54597	2035	1741	0.302	0.445	0.411512	4.73e-25	1.44e-20	up	Sgcg
Cardiomyocytes	ENSMUSG00000072294	1.48854	1.97974	2035	1741	0.223	0.325	0.411411	1.13e-17	3.43e-13	up	Klf12
Cardiomyocytes	ENSMUSG00000022708	19.6903	26.1754	2035	1741	0.802	0.821	0.410726	2.53e-21	7.72e-17	up	Zbtb20
Cardiomyocytes	ENSMUSG00000027956	0.460235	0.611738	2035	1741	0.089	0.138	0.410543	2.67e-11	8.13e-07	up	Tmem144
Cardiomyocytes	ENSMUSG00000002028	1.17723	1.56396	2035	1741	0.205	0.331	0.409806	2.91e-31	8.86e-27	up	Kmt2a
Cardiomyocytes	ENSMUSG00000008763	0.887965	1.17911	2035	1741	0.158	0.257	0.409129	1.74e-22	5.3e-18	up	Man1a2
Cardiomyocytes	ENSMUSG00000024955	0.68856	0.913038	2035	1741	0.131	0.237	0.407094	1.93e-34	5.89e-30	up	Esrra
Cardiomyocytes	ENSMUSG00000075324	1.43119	1.89776	2035	1741	0.2	0.334	0.407076	3.61e-28	1.1e-23	up	Fign
Cardiomyocytes	ENSMUSG00000031858	0.335534	0.444835	2035	1741	0.069	0.129	0.406814	5.07e-20	1.54e-15	up	Mau2
Cardiomyocytes	ENSMUSG00000033767	0.672711	0.891629	2035	1741	0.12	0.213	0.406457	3.49e-25	1.06e-20	up	Tmem131l
Cardiomyocytes	ENSMUSG00000030779	0.718357	0.951577	2035	1741	0.14	0.23	0.405619	1.87e-22	5.71e-18	up	Rbbp6
Cardiomyocytes	ENSMUSG00000003847	1.54976	2.05259	2035	1741	0.237	0.368	0.405396	8.74e-25	2.66e-20	up	Nfat5
Cardiomyocytes	ENSMUSG00000034042	0.64	0.847335	2035	1741	0.125	0.217	0.404859	1.35e-25	4.12e-21	up	Gpbp1l1
Cardiomyocytes	ENSMUSG00000032688	0.351497	0.464914	2035	1741	0.069	0.119	0.403449	7.62e-14	2.32e-09	up	Malt1
Cardiomyocytes	ENSMUSG00000031532	2.3553	3.11283	2035	1741	0.343	0.464	0.402317	5.33e-18	1.62e-13	up	Saraf
Cardiomyocytes	ENSMUSG00000000326	1.81429	2.39779	2035	1741	0.293	0.431	0.402305	1.17e-26	3.58e-22	up	Comt
Cardiomyocytes	ENSMUSG00000047888	2.49308	3.29462	2035	1741	0.349	0.488	0.402178	2.1e-20	6.39e-16	up	Tnrc6b
Cardiomyocytes	ENSMUSG00000021391	0.399467	0.527803	2035	1741	0.071	0.112	0.401923	2.6e-11	7.93e-07	up	Cenpp
Cardiomyocytes	ENSMUSG00000022141	1.95267	2.57992	2035	1741	0.288	0.435	0.401884	6.12e-29	1.86e-24	up	Nipbl
Cardiomyocytes	ENSMUSG00000026888	2.95673	3.90445	2035	1741	0.357	0.477	0.401118	2.85e-14	8.68e-10	up	Grb14
Cardiomyocytes	ENSMUSG00000010175	1.02409	1.35232	2035	1741	0.175	0.279	0.401093	1.84e-23	5.61e-19	up	Prox1
Cardiomyocytes	ENSMUSG00000026313	0.950815	1.25551	2035	1741	0.171	0.266	0.401039	1.68e-19	5.12e-15	up	Hdac4
Cardiomyocytes	ENSMUSG00000024483	1.35354	1.78552	2035	1741	0.22	0.342	0.399606	1.2e-24	3.67e-20	up	Ankhd1
Cardiomyocytes	ENSMUSG00000040760	0.482738	0.636727	2035	1741	0.093	0.154	0.399434	6.32e-15	1.93e-10	up	Appl1
Cardiomyocytes	ENSMUSG00000039234	0.919394	1.2125	2035	1741	0.16	0.246	0.399226	2.44e-16	7.44e-12	up	Sec24d
Cardiomyocytes	ENSMUSG00000021219	2.4063	3.17337	2035	1741	0.216	0.302	0.399201	1.4e-10	4.27e-06	up	Rgs6
Cardiomyocytes	ENSMUSG00000111867	0.868837	1.14561	2035	1741	0.142	0.235	0.398958	2.37e-21	7.21e-17	up	Gm31013
Cardiomyocytes	ENSMUSG00000005371	0.822822	1.08454	2035	1741	0.146	0.221	0.398436	5.51e-15	1.68e-10	up	Fbxo11
Cardiomyocytes	ENSMUSG00000026131	8.43408	11.1163	2035	1741	0.711	0.779	0.398369	3.99e-15	1.22e-10	up	Dst
Cardiomyocytes	ENSMUSG00000033060	6.55907	8.64187	2035	1741	0.593	0.686	0.397851	1.84e-11	5.6e-07	up	Lmo7
Cardiomyocytes	ENSMUSG00000026502	0.884261	1.1649	2035	1741	0.153	0.249	0.397659	1.92e-23	5.85e-19	up	Desi2
Cardiomyocytes	ENSMUSG00000035247	1.43598	1.88921	2035	1741	0.242	0.361	0.395749	8.48e-24	2.58e-19	up	Hectd1
Cardiomyocytes	ENSMUSG00000026319	0.459698	0.60471	2035	1741	0.086	0.152	0.395555	2.65e-19	8.09e-15	up	Relch
Cardiomyocytes	ENSMUSG00000021619	1.14058	1.49992	2035	1741	0.173	0.289	0.39512	3.84e-26	1.17e-21	up	Atg10
Cardiomyocytes	ENSMUSG00000058056	10.6325	13.979	2035	1741	0.537	0.635	0.394784	1.99e-12	6.07e-08	up	Palld
Cardiomyocytes	ENSMUSG00000032827	1.38449	1.81949	2035	1741	0.211	0.347	0.394177	3.72e-32	1.14e-27	up	Ppp1r9a
Cardiomyocytes	ENSMUSG00000025571	2.54419	3.34136	2035	1741	0.35	0.491	0.393229	4.21e-20	1.28e-15	up	Tnrc6c
Cardiomyocytes	ENSMUSG00000019873	0.598289	0.785062	2035	1741	0.116	0.177	0.391963	9.46e-14	2.88e-09	up	Reep3
Cardiomyocytes	ENSMUSG00000024943	0.287301	0.376793	2035	1741	0.063	0.101	0.39121	1.8e-09	5.47e-05	up	Smc5
Cardiomyocytes	ENSMUSG00000030846	0.612583	0.80282	2035	1741	0.121	0.208	0.390171	3.05e-25	9.31e-21	up	Tial1
Cardiomyocytes	ENSMUSG00000032374	0.517267	0.677851	2035	1741	0.097	0.166	0.390057	1.18e-19	3.6e-15	up	Plod2
Cardiomyocytes	ENSMUSG00000015647	0.574143	0.75225	2035	1741	0.112	0.202	0.389802	7.72e-26	2.35e-21	up	Lama5
Cardiomyocytes	ENSMUSG00000041997	0.880667	1.15371	2035	1741	0.154	0.255	0.389617	1.78e-24	5.42e-20	up	Tlk1
Cardiomyocytes	ENSMUSG00000030822	0.274736	0.359901	2035	1741	0.057	0.102	0.389554	2.95e-13	8.98e-09	up	Prr14
Cardiomyocytes	ENSMUSG00000040028	0.55943	0.732814	2035	1741	0.108	0.183	0.38949	3.36e-21	1.02e-16	up	Elavl1
Cardiomyocytes	ENSMUSG00000042046	0.384735	0.503957	2035	1741	0.074	0.126	0.389435	2.12e-14	6.46e-10	up	Dstyk
Cardiomyocytes	ENSMUSG00000019848	0.651356	0.85311	2035	1741	0.121	0.184	0.389287	1.6e-12	4.89e-08	up	Popdc3
Cardiomyocytes	ENSMUSG00000028977	1.75072	2.29226	2035	1741	0.26	0.385	0.388828	5.18e-23	1.58e-18	up	Casz1
Cardiomyocytes	ENSMUSG00000022214	0.490168	0.641775	2035	1741	0.095	0.159	0.388791	5.36e-18	1.63e-13	up	Dcaf11
Cardiomyocytes	ENSMUSG00000033653	0.432398	0.565848	2035	1741	0.085	0.137	0.388057	6.83e-12	2.08e-07	up	Vps8
Cardiomyocytes	ENSMUSG00000023830	2.92858	3.83056	2035	1741	0.388	0.504	0.387352	4.12e-13	1.26e-08	up	Igf2r
Cardiomyocytes	ENSMUSG00000032456	0.378072	0.494344	2035	1741	0.074	0.126	0.386854	6.15e-15	1.88e-10	up	Nmnat3
Cardiomyocytes	ENSMUSG00000024240	1.0835	1.41672	2035	1741	0.19	0.302	0.38685	1.33e-24	4.06e-20	up	Epc1
Cardiomyocytes	ENSMUSG00000029313	1.10467	1.44423	2035	1741	0.196	0.293	0.386682	1.23e-19	3.74e-15	up	Aff1
Cardiomyocytes	ENSMUSG00000050965	1.88946	2.46974	2035	1741	0.246	0.361	0.386382	4.98e-19	1.52e-14	up	Prkca
Cardiomyocytes	ENSMUSG00000071064	0.82076	1.07225	2035	1741	0.14	0.239	0.385602	4.21e-26	1.28e-21	up	Zfp827
Cardiomyocytes	ENSMUSG00000097375	0.665556	0.868924	2035	1741	0.124	0.213	0.384671	2.49e-23	7.6e-19	up	6720427I07Rik
Cardiomyocytes	ENSMUSG00000036093	0.313474	0.409258	2035	1741	0.065	0.102	0.384666	2.87e-08	0.000875249	up	Arl5a
Cardiomyocytes	ENSMUSG00000031314	0.326399	0.426065	2035	1741	0.064	0.102	0.384441	9.07e-09	0.000276539	up	Taf1
Cardiomyocytes	ENSMUSG00000020687	0.300129	0.391771	2035	1741	0.061	0.11	0.384424	7.24e-16	2.21e-11	up	Cdc27
Cardiomyocytes	ENSMUSG00000037426	0.334194	0.435947	2035	1741	0.068	0.118	0.383464	6.47e-14	1.97e-09	up	Depdc5
Cardiomyocytes	ENSMUSG00000117694	0.253678	0.330405	2035	1741	0.05	0.101	0.381239	7.82e-19	2.38e-14	up	Snhg4
Cardiomyocytes	ENSMUSG00000074781	0.412589	0.53737	2035	1741	0.077	0.113	0.381209	5.75e-08	0.00175335	up	Ube2n
Cardiomyocytes	ENSMUSG00000020170	0.855169	1.11379	2035	1741	0.146	0.25	0.381201	6.44e-28	1.96e-23	up	Frs2
Cardiomyocytes	ENSMUSG00000053877	0.259097	0.337281	2035	1741	0.057	0.108	0.380457	2.58e-19	7.86e-15	up	Srcap
Cardiomyocytes	ENSMUSG00000022201	1.64422	2.1377	2035	1741	0.259	0.394	0.378658	1.64e-28	5e-24	up	Zfr
Cardiomyocytes	ENSMUSG00000038538	2.00077	2.59938	2035	1741	0.302	0.419	0.37761	3.37e-18	1.03e-13	up	Ubn2
Cardiomyocytes	ENSMUSG00000029456	0.369292	0.479691	2035	1741	0.079	0.144	0.377342	1.22e-20	3.72e-16	up	Acad10
Cardiomyocytes	ENSMUSG00000085672	0.337379	0.438114	2035	1741	0.059	0.113	0.376935	1.51e-16	4.6e-12	up	Gm16193
Cardiomyocytes	ENSMUSG00000042807	0.988965	1.28417	2035	1741	0.148	0.239	0.376847	9.58e-22	2.92e-17	up	Hecw2
Cardiomyocytes	ENSMUSG00000068699	0.875473	1.13677	2035	1741	0.16	0.222	0.376807	2.74e-10	8.34e-06	up	Flnc
Cardiomyocytes	ENSMUSG00000020078	0.370158	0.480289	2035	1741	0.069	0.122	0.375762	1.62e-16	4.93e-12	up	Vps26a
Cardiomyocytes	ENSMUSG00000021798	6.99131	9.06056	2035	1741	0.607	0.702	0.374037	7.45e-12	2.27e-07	up	Ldb3
Cardiomyocytes	ENSMUSG00000024805	1.74335	2.25907	2035	1741	0.262	0.385	0.373866	1.21e-21	3.68e-17	up	Pcgf5
Cardiomyocytes	ENSMUSG00000030102	2.10003	2.72112	2035	1741	0.28	0.376	0.373789	3.82e-14	1.16e-09	up	Itpr1
Cardiomyocytes	ENSMUSG00000024921	0.768546	0.995034	2035	1741	0.13	0.215	0.372615	1.22e-21	3.73e-17	up	Smarca2
Cardiomyocytes	ENSMUSG00000035949	0.439555	0.569	2035	1741	0.089	0.142	0.372384	9.18e-14	2.8e-09	up	Fbxw2
Cardiomyocytes	ENSMUSG00000030201	0.945515	1.2236	2035	1741	0.167	0.262	0.371958	3.1e-22	9.44e-18	up	Lrp6
Cardiomyocytes	ENSMUSG00000040850	4.53608	5.86801	2035	1741	0.486	0.6	0.371425	1.64e-11	4.99e-07	up	Psme4
Cardiomyocytes	ENSMUSG00000025997	0.541194	0.700044	2035	1741	0.103	0.177	0.371299	1.17e-20	3.56e-16	up	Ikzf2
Cardiomyocytes	ENSMUSG00000033411	0.4328	0.559616	2035	1741	0.087	0.143	0.370737	8.53e-15	2.6e-10	up	Ctdspl2
Cardiomyocytes	ENSMUSG00000030029	0.285754	0.369409	2035	1741	0.059	0.106	0.370445	1.27e-14	3.88e-10	up	Lrig1
Cardiomyocytes	ENSMUSG00000044033	4.5967	5.94144	2035	1741	0.444	0.558	0.370214	1.83e-11	5.59e-07	up	Ccdc141
Cardiomyocytes	ENSMUSG00000024743	0.325424	0.420291	2035	1741	0.063	0.109	0.36907	1.92e-13	5.86e-09	up	Syt7
Cardiomyocytes	ENSMUSG00000112707	7.11003	9.17782	2035	1741	0.457	0.566	0.368295	2.18e-12	6.63e-08	up	D830005E20Rik
Cardiomyocytes	ENSMUSG00000028580	0.888011	1.14623	2035	1741	0.165	0.25	0.368252	2.63e-18	8.03e-14	up	Pum1
Cardiomyocytes	ENSMUSG00000017428	0.81322	1.04877	2035	1741	0.15	0.234	0.366987	1.79e-21	5.45e-17	up	Psmd11
Cardiomyocytes	ENSMUSG00000021221	1.25302	1.61581	2035	1741	0.188	0.291	0.366848	4.47e-21	1.36e-16	up	Dpf3
Cardiomyocytes	ENSMUSG00000086121	0.392926	0.506585	2035	1741	0.073	0.14	0.366547	4.42e-22	1.35e-17	up	Gm16068
Cardiomyocytes	ENSMUSG00000020902	0.816386	1.05212	2035	1741	0.134	0.21	0.365977	9.73e-17	2.97e-12	up	Ntn1
Cardiomyocytes	ENSMUSG00000044072	0.502921	0.647828	2035	1741	0.089	0.148	0.365278	7.48e-16	2.28e-11	up	Eml6
Cardiomyocytes	ENSMUSG00000029655	0.868033	1.11772	2035	1741	0.158	0.265	0.364736	3.59e-30	1.09e-25	up	N4bp2l2
Cardiomyocytes	ENSMUSG00000022812	1.37851	1.775	2035	1741	0.235	0.338	0.364709	5.13e-19	1.56e-14	up	Gsk3b
Cardiomyocytes	ENSMUSG00000042895	0.531012	0.683609	2035	1741	0.103	0.171	0.364426	7.59e-18	2.31e-13	up	Abra
Cardiomyocytes	ENSMUSG00000030876	0.680062	0.874824	2035	1741	0.125	0.211	0.363327	1.23e-25	3.74e-21	up	Mettl9
Cardiomyocytes	ENSMUSG00000048915	1.6967	2.18235	2035	1741	0.207	0.314	0.363157	1.25e-19	3.82e-15	up	Efna5
Cardiomyocytes	ENSMUSG00000032497	2.77187	3.56525	2035	1741	0.389	0.511	0.363145	2.08e-13	6.35e-09	up	Lrrfip2
Cardiomyocytes	ENSMUSG00000032845	1.7677	2.27255	2035	1741	0.254	0.374	0.362441	7.83e-23	2.39e-18	up	Alpk2
Cardiomyocytes	ENSMUSG00000032423	0.906343	1.16497	2035	1741	0.159	0.246	0.36216	1.44e-20	4.4e-16	up	Syncrip
Cardiomyocytes	ENSMUSG00000038170	13.4957	17.3464	2035	1741	0.764	0.789	0.36214	6.53e-20	1.99e-15	up	Pde4dip
Cardiomyocytes	ENSMUSG00000022536	0.490754	0.630733	2035	1741	0.094	0.145	0.362029	1.83e-12	5.57e-08	up	Glyr1
Cardiomyocytes	ENSMUSG00000024764	0.414843	0.53306	2035	1741	0.09	0.156	0.361733	2.79e-21	8.5e-17	up	Naa40
Cardiomyocytes	ENSMUSG00000015365	0.367024	0.471607	2035	1741	0.073	0.125	0.361711	5.81e-15	1.77e-10	up	Mov10l1
Cardiomyocytes	ENSMUSG00000021192	0.328039	0.421239	2035	1741	0.062	0.11	0.360773	4.77e-16	1.45e-11	up	Golga5
Cardiomyocytes	ENSMUSG00000052534	4.53363	5.82159	2035	1741	0.411	0.526	0.360746	3.75e-12	1.14e-07	up	Pbx1
Cardiomyocytes	ENSMUSG00000029534	0.830432	1.06629	2035	1741	0.137	0.219	0.36067	1.34e-18	4.1e-14	up	St7
Cardiomyocytes	ENSMUSG00000038954	0.639542	0.821176	2035	1741	0.103	0.192	0.360652	1.06e-29	3.23e-25	up	Supt3
Cardiomyocytes	ENSMUSG00000022641	0.626068	0.803676	2035	1741	0.112	0.184	0.360296	1.5e-19	4.58e-15	up	Bbx
Cardiomyocytes	ENSMUSG00000030655	2.01472	2.58578	2035	1741	0.294	0.427	0.360018	2.08e-22	6.32e-18	up	Smg1
Cardiomyocytes	ENSMUSG00000035189	1.5623	1.21719	2035	1741	0.189	0.203	-0.360114	1.19e-14	3.63e-10	down	Ano4
Cardiomyocytes	ENSMUSG00000110803	0.691854	0.538911	2035	1741	0.122	0.137	-0.360423	4.1e-16	1.25e-11	down	Gm20275
Cardiomyocytes	ENSMUSG00000025362	2.94255	2.2853	2035	1741	0.393	0.313	-0.364687	2.6e-11	7.94e-07	down	Rps26
Cardiomyocytes	ENSMUSG00000025732	0.944311	0.733385	2035	1741	0.159	0.168	-0.364691	2.33e-17	7.1e-13	down	Mcrip2
Cardiomyocytes	ENSMUSG00000040006	0.739687	0.574416	2035	1741	0.139	0.139	-0.364819	9.42e-13	2.87e-08	down	Ginm1
Cardiomyocytes	ENSMUSG00000042079	0.950108	0.737449	2035	1741	0.166	0.144	-0.365547	3.45e-07	0.0105223	down	Hnrnpf
Cardiomyocytes	ENSMUSG00000036155	1.30826	1.01544	2035	1741	0.192	0.234	-0.365549	1.7e-32	5.18e-28	down	Mgat5
Cardiomyocytes	ENSMUSG00000087201	0.725604	0.562925	2035	1741	0.099	0.104	-0.366241	3.65e-10	1.11e-05	down	Gm15261
Cardiomyocytes	ENSMUSG00000022400	1.3108	1.0165	2035	1741	0.211	0.186	-0.36683	5.65e-08	0.00172172	down	Rbx1
Cardiomyocytes	ENSMUSG00000020823	0.689181	0.533417	2035	1741	0.129	0.133	-0.369621	5.44e-13	1.66e-08	down	Sec14l1
Cardiomyocytes	ENSMUSG00000019851	0.985126	0.762411	2035	1741	0.166	0.161	-0.369738	1.45e-11	4.41e-07	down	Perp
Cardiomyocytes	ENSMUSG00000044813	0.493548	0.381006	2035	1741	0.091	0.109	-0.373374	3.3e-15	1e-10	down	Shb
Cardiomyocytes	ENSMUSG00000022403	1.40494	1.08205	2035	1741	0.235	0.23	-0.376739	8.03e-18	2.45e-13	down	St13
Cardiomyocytes	ENSMUSG00000008683	3.8325	2.94972	2035	1741	0.482	0.388	-0.377707	3.27e-13	9.95e-09	down	Rps15a
Cardiomyocytes	ENSMUSG00000032042	1.16178	0.892832	2035	1741	0.191	0.194	-0.379871	2.95e-17	8.99e-13	down	Srpr
Cardiomyocytes	ENSMUSG00000029767	1.44988	1.11392	2035	1741	0.226	0.224	-0.380282	4.85e-17	1.48e-12	down	Calu
Cardiomyocytes	ENSMUSG00000005469	0.784707	0.602611	2035	1741	0.141	0.146	-0.380926	1.03e-16	3.14e-12	down	Prkaca
Cardiomyocytes	ENSMUSG00000020593	1.7349	1.3284	2035	1741	0.25	0.274	-0.385155	1.08e-27	3.28e-23	down	Lpin1
Cardiomyocytes	ENSMUSG00000086863	1.08443	0.829409	2035	1741	0.18	0.182	-0.386776	1.26e-17	3.84e-13	down	Gm15543
Cardiomyocytes	ENSMUSG00000021365	0.669336	0.511385	2035	1741	0.114	0.111	-0.388321	1.7e-08	0.000517161	down	Nedd9
Cardiomyocytes	ENSMUSG00000020964	0.627029	0.478978	2035	1741	0.112	0.127	-0.388574	3.52e-17	1.07e-12	down	Sel1l
Cardiomyocytes	ENSMUSG00000064358	87.288	66.6346	2035	1741	0.998	0.999	-0.389513	1.27e-45	3.88e-41	down	mt-Co3
Cardiomyocytes	ENSMUSG00000024425	1.9069	1.45448	2035	1741	0.305	0.295	-0.390732	2.04e-21	6.22e-17	down	Ndfip1
Cardiomyocytes	ENSMUSG00000025981	0.535242	0.406486	2035	1741	0.103	0.11	-0.396987	1e-13	3.05e-09	down	Coq10b
Cardiomyocytes	ENSMUSG00000053453	0.730068	0.554361	2035	1741	0.131	0.123	-0.397204	2.94e-09	8.95e-05	down	Thoc7
Cardiomyocytes	ENSMUSG00000038762	0.77661	0.589488	2035	1741	0.128	0.124	-0.397727	5.85e-10	1.78e-05	down	Abcf1
Cardiomyocytes	ENSMUSG00000019797	0.842032	0.638059	2035	1741	0.141	0.154	-0.400185	3.45e-20	1.05e-15	down	Mtres1
Cardiomyocytes	ENSMUSG00000040694	1.04735	0.792949	2035	1741	0.175	0.172	-0.401438	3.59e-16	1.09e-11	down	Apobec2
Cardiomyocytes	ENSMUSG00000010911	0.658301	0.497463	2035	1741	0.117	0.118	-0.404159	1.49e-11	4.54e-07	down	Apip
Cardiomyocytes	ENSMUSG00000001794	1.21954	0.919719	2035	1741	0.201	0.172	-0.407072	4.13e-07	0.0125847	down	Capns1
Cardiomyocytes	ENSMUSG00000057098	1.6526	1.24051	2035	1741	0.18	0.1	-0.413808	1e-11	3.05e-07	down	Ebf1
Cardiomyocytes	ENSMUSG00000003814	1.62207	1.21697	2035	1741	0.253	0.213	-0.414543	3.12e-11	9.52e-07	down	Calr
Cardiomyocytes	ENSMUSG00000068749	0.596684	0.447195	2035	1741	0.098	0.109	-0.416061	2.25e-16	6.84e-12	down	Psma5
Cardiomyocytes	ENSMUSG00000015120	0.515225	0.384966	2035	1741	0.093	0.103	-0.42047	1.23e-15	3.75e-11	down	Ube2i
Cardiomyocytes	ENSMUSG00000033044	0.621252	0.463077	2035	1741	0.112	0.12	-0.423925	3.37e-18	1.03e-13	down	Dhrs7c
Cardiomyocytes	ENSMUSG00000039943	1.76438	1.31307	2035	1741	0.241	0.236	-0.426221	2.07e-15	6.31e-11	down	Plcb4
Cardiomyocytes	ENSMUSG00000037062	2.84803	2.11632	2035	1741	0.408	0.368	-0.428407	1.4e-21	4.26e-17	down	Sh3glb1
Cardiomyocytes	ENSMUSG00000044086	1.01306	0.752227	2035	1741	0.162	0.164	-0.429482	8.77e-18	2.67e-13	down	Lmod3
Cardiomyocytes	ENSMUSG00000026672	1.23453	0.912141	2035	1741	0.207	0.203	-0.436631	6.71e-18	2.05e-13	down	Optn
Cardiomyocytes	ENSMUSG00000020955	0.586385	0.432207	2035	1741	0.112	0.111	-0.440127	1.01e-11	3.07e-07	down	Ap4s1
Cardiomyocytes	ENSMUSG00000028618	1.50464	1.10724	2035	1741	0.238	0.221	-0.442457	2.06e-17	6.29e-13	down	Tmem59
Cardiomyocytes	ENSMUSG00000073639	0.76887	0.564876	2035	1741	0.133	0.131	-0.444805	2.63e-13	8.01e-09	down	Rab18
Cardiomyocytes	ENSMUSG00000040269	1.36324	1.0012	2035	1741	0.228	0.231	-0.445317	4.68e-24	1.43e-19	down	Mrps28
Cardiomyocytes	ENSMUSG00000079184	0.756065	0.554984	2035	1741	0.127	0.145	-0.446064	9.46e-20	2.88e-15	down	Mphosph8
Cardiomyocytes	ENSMUSG00000063275	0.815919	0.598694	2035	1741	0.15	0.148	-0.446608	9.82e-15	2.99e-10	down	Hacd1
Cardiomyocytes	ENSMUSG00000024072	0.70056	0.513961	2035	1741	0.129	0.131	-0.446849	7.81e-17	2.38e-12	down	Yipf4
Cardiomyocytes	ENSMUSG00000028822	0.957313	0.70019	2035	1741	0.163	0.15	-0.451245	2.74e-12	8.34e-08	down	Tmem50a
Cardiomyocytes	ENSMUSG00000000127	0.707819	0.51754	2035	1741	0.119	0.144	-0.45171	4.53e-26	1.38e-21	down	Fer
Cardiomyocytes	ENSMUSG00000018566	1.56243	1.14132	2035	1741	0.253	0.235	-0.453087	5e-18	1.52e-13	down	Slc2a4
Cardiomyocytes	ENSMUSG00000004771	0.669563	0.488033	2035	1741	0.115	0.109	-0.45624	6.88e-11	2.1e-06	down	Rab11a
Cardiomyocytes	ENSMUSG00000046727	0.670183	0.488218	2035	1741	0.124	0.112	-0.457029	1.78e-07	0.00543195	down	Cystm1
Cardiomyocytes	ENSMUSG00000026235	1.67481	1.21916	2035	1741	0.216	0.221	-0.458104	3.7e-15	1.13e-10	down	Epha4
Cardiomyocytes	ENSMUSG00000028861	0.537494	0.390695	2035	1741	0.101	0.095	-0.460207	1.38e-09	4.2e-05	down	Mrps15
Cardiomyocytes	ENSMUSG00000033543	0.651326	0.472347	2035	1741	0.117	0.119	-0.463531	1.33e-15	4.05e-11	down	Gtf2a2
Cardiomyocytes	ENSMUSG00000074656	1.45008	1.04736	2035	1741	0.227	0.203	-0.469377	1.22e-14	3.72e-10	down	Eif2s2
Cardiomyocytes	ENSMUSG00000022108	7.15121	5.15919	2035	1741	0.655	0.583	-0.471043	1.58e-34	4.82e-30	down	Itm2b
Cardiomyocytes	ENSMUSG00000006205	0.845957	0.609395	2035	1741	0.154	0.14	-0.473207	9.22e-11	2.81e-06	down	Htra1
Cardiomyocytes	ENSMUSG00000037149	0.635102	0.457268	2035	1741	0.117	0.115	-0.473948	8.81e-12	2.69e-07	down	Ddx1
Cardiomyocytes	ENSMUSG00000032458	0.784701	0.563938	2035	1741	0.135	0.12	-0.476605	6.92e-09	0.000211013	down	Copb2
Cardiomyocytes	ENSMUSG00000003299	0.655493	0.470633	2035	1741	0.115	0.105	-0.477976	6.84e-10	2.08e-05	down	Mrpl4
Cardiomyocytes	ENSMUSG00000029499	0.882875	0.628544	2035	1741	0.16	0.149	-0.490196	1.65e-15	5.04e-11	down	Pxmp2
Cardiomyocytes	ENSMUSG00000025940	0.686435	0.487557	2035	1741	0.114	0.1	-0.493553	4.53e-07	0.0137947	down	Tmem70
Cardiomyocytes	ENSMUSG00000110517	0.530119	0.376315	2035	1741	0.1	0.11	-0.494377	4.27e-20	1.3e-15	down	Gm31224
Cardiomyocytes	ENSMUSG00000030738	1.35278	0.959259	2035	1741	0.209	0.165	-0.495936	3.42e-09	0.000104264	down	Eif3c
Cardiomyocytes	ENSMUSG00000035305	1.17889	0.834587	2035	1741	0.163	0.173	-0.498291	1.64e-17	4.99e-13	down	Ror1
Cardiomyocytes	ENSMUSG00000031447	3.25977	2.28885	2035	1741	0.436	0.354	-0.510149	2.08e-21	6.34e-17	down	Lamp1
Cardiomyocytes	ENSMUSG00000021772	0.512467	0.35969	2035	1741	0.096	0.106	-0.510705	1.44e-19	4.38e-15	down	Nkiras1
Cardiomyocytes	ENSMUSG00000032526	0.827735	0.580468	2035	1741	0.136	0.121	-0.511953	4.54e-10	1.38e-05	down	Ss18l2
Cardiomyocytes	ENSMUSG00000046603	0.667073	0.4677	2035	1741	0.108	0.119	-0.512262	1.63e-19	4.97e-15	down	Tcaim
Cardiomyocytes	ENSMUSG00000051154	0.751877	0.524779	2035	1741	0.132	0.119	-0.518788	8.71e-13	2.65e-08	down	Commd3
Cardiomyocytes	ENSMUSG00000029465	0.959577	0.666242	2035	1741	0.161	0.123	-0.526352	1.32e-07	0.00403437	down	Arpc3
Cardiomyocytes	ENSMUSG00000039611	0.644006	0.443669	2035	1741	0.126	0.111	-0.537589	1.44e-10	4.4e-06	down	Tmem246
Cardiomyocytes	ENSMUSG00000053062	1.40632	0.966982	2035	1741	0.231	0.211	-0.540368	1.51e-22	4.6e-18	down	Jam2
Cardiomyocytes	ENSMUSG00000021124	0.800424	0.546613	2035	1741	0.143	0.116	-0.550243	1.65e-10	5.03e-06	down	Vti1b
Cardiomyocytes	ENSMUSG00000054455	0.696309	0.473458	2035	1741	0.12	0.113	-0.556492	1.87e-13	5.69e-09	down	Vapb
Cardiomyocytes	ENSMUSG00000028517	1.40092	0.951384	2035	1741	0.217	0.187	-0.558276	2.94e-17	8.95e-13	down	Plpp3
Cardiomyocytes	ENSMUSG00000020154	1.19486	0.810664	2035	1741	0.149	0.088	-0.559666	5.47e-08	0.00166776	down	Ptprb
Cardiomyocytes	ENSMUSG00000032002	0.790629	0.535279	2035	1741	0.146	0.137	-0.562709	7.71e-17	2.35e-12	down	Dcun1d5
Cardiomyocytes	ENSMUSG00000029309	1.57475	1.06364	2035	1741	0.212	0.138	-0.566109	3.73e-09	0.000113693	down	Sparcl1
Cardiomyocytes	ENSMUSG00000058254	0.947901	0.638086	2035	1741	0.139	0.119	-0.570985	4.55e-09	0.0001386	down	Tspan7
Cardiomyocytes	ENSMUSG00000018906	0.542788	0.363575	2035	1741	0.105	0.104	-0.578136	8.19e-14	2.5e-09	down	P4ha2
Cardiomyocytes	ENSMUSG00000002767	0.606391	0.40572	2035	1741	0.105	0.086	-0.579765	3.68e-07	0.0112097	down	Mrpl2
Cardiomyocytes	ENSMUSG00000028367	0.845381	0.563135	2035	1741	0.143	0.113	-0.586121	1.01e-08	0.000307081	down	Txn1
Cardiomyocytes	ENSMUSG00000021242	0.754446	0.498445	2035	1741	0.131	0.104	-0.597985	1.85e-07	0.00564936	down	Npc2
Cardiomyocytes	ENSMUSG00000020180	0.69712	0.460343	2035	1741	0.124	0.09	-0.598697	1.23e-06	0.0374277	down	Snrpd3
Cardiomyocytes	ENSMUSG00000021794	1.01574	0.670067	2035	1741	0.166	0.145	-0.600154	1.29e-15	3.92e-11	down	Glud1
Cardiomyocytes	ENSMUSG00000042613	0.600687	0.395611	2035	1741	0.107	0.086	-0.602531	3.88e-07	0.0118396	down	Pbxip1
Cardiomyocytes	ENSMUSG00000014905	0.536214	0.35303	2035	1741	0.104	0.082	-0.603018	9.14e-08	0.0027845	down	Dnajb9
Cardiomyocytes	ENSMUSG00000020570	1.16031	0.7587	2035	1741	0.197	0.186	-0.612914	2.85e-24	8.69e-20	down	Sypl
Cardiomyocytes	ENSMUSG00000071076	1.04543	0.683286	2035	1741	0.179	0.138	-0.613534	4.16e-11	1.27e-06	down	Jund
Cardiomyocytes	ENSMUSG00000023106	0.631353	0.408055	2035	1741	0.103	0.084	-0.629682	6.58e-09	0.000200603	down	Denr
Cardiomyocytes	ENSMUSG00000032712	1.5697	1.01439	2035	1741	0.221	0.194	-0.629882	2.16e-17	6.58e-13	down	Resf1
Cardiomyocytes	ENSMUSG00000039167	0.926606	0.597271	2035	1741	0.12	0.064	-0.63357	2.57e-08	0.0007834	down	Adgrl4
Cardiomyocytes	ENSMUSG00000026365	2.31828	1.49228	2035	1741	0.238	0.186	-0.635538	1.59e-10	4.84e-06	down	Cfh
Cardiomyocytes	ENSMUSG00000002660	0.659382	0.42395	2035	1741	0.121	0.101	-0.63722	5.54e-11	1.69e-06	down	Clpp
Cardiomyocytes	ENSMUSG00000025130	0.980576	0.630346	2035	1741	0.168	0.134	-0.637485	9.74e-13	2.97e-08	down	P4hb
Cardiomyocytes	ENSMUSG00000062963	0.619964	0.397511	2035	1741	0.108	0.089	-0.641191	1.55e-09	4.72e-05	down	Ufc1
Cardiomyocytes	ENSMUSG00000033751	0.707485	0.451753	2035	1741	0.114	0.088	-0.647166	4.41e-09	0.000134505	down	Gadd45gip1
Cardiomyocytes	ENSMUSG00000024845	0.706161	0.446023	2035	1741	0.124	0.096	-0.662879	9.07e-10	2.77e-05	down	Tmem134
Cardiomyocytes	ENSMUSG00000016087	0.900592	0.567453	2035	1741	0.11	0.062	-0.666373	6.9e-07	0.0210207	down	Fli1
Cardiomyocytes	ENSMUSG00000019966	1.05716	0.665656	2035	1741	0.143	0.093	-0.667349	7.58e-08	0.0023109	down	Kitl
Cardiomyocytes	ENSMUSG00000038086	0.574427	0.359573	2035	1741	0.101	0.087	-0.675837	1.54e-10	4.7e-06	down	Hspb2
Cardiomyocytes	ENSMUSG00000022272	0.995602	0.621675	2035	1741	0.157	0.13	-0.67941	1.19e-14	3.62e-10	down	Myo10
Cardiomyocytes	ENSMUSG00000062960	0.956418	0.594252	2035	1741	0.134	0.076	-0.686565	4.47e-08	0.00136187	down	Kdr
Cardiomyocytes	ENSMUSG00000047907	0.887475	0.547337	2035	1741	0.108	0.059	-0.697277	2.66e-07	0.00810798	down	Tshz2
Cardiomyocytes	ENSMUSG00000024309	0.64659	0.396971	2035	1741	0.114	0.082	-0.703816	2e-07	0.00608637	down	Pfdn6
Cardiomyocytes	ENSMUSG00000075702	0.775835	0.476208	2035	1741	0.127	0.082	-0.704158	3.16e-07	0.00964439	down	Selenom
Cardiomyocytes	ENSMUSG00000029017	1.02965	0.625087	2035	1741	0.17	0.123	-0.72003	1.02e-11	3.11e-07	down	Pmpcb
Cardiomyocytes	ENSMUSG00000033916	0.895243	0.537855	2035	1741	0.152	0.103	-0.735063	9.22e-10	2.81e-05	down	Chmp2a
Cardiomyocytes	ENSMUSG00000041134	1.03687	0.621099	2035	1741	0.125	0.072	-0.739335	2.27e-07	0.00692924	down	Cyyr1
Cardiomyocytes	ENSMUSG00000018858	0.606485	0.357891	2035	1741	0.104	0.082	-0.76095	5.44e-11	1.66e-06	down	Mrpl58
Cardiomyocytes	ENSMUSG00000022415	1.41218	0.828966	2035	1741	0.226	0.19	-0.768537	1.41e-26	4.31e-22	down	Syngr1
Cardiomyocytes	ENSMUSG00000022442	0.64072	0.374355	2035	1741	0.111	0.099	-0.775286	9.08e-20	2.77e-15	down	Ttll1
Cardiomyocytes	ENSMUSG00000021114	0.677457	0.381055	2035	1741	0.122	0.096	-0.830128	2.03e-15	6.18e-11	down	Atp6v1d
Cardiomyocytes	ENSMUSG00000022579	0.923915	0.510263	2035	1741	0.128	0.069	-0.856519	1.13e-09	3.44e-05	down	Gpihbp1
Cardiomyocytes	ENSMUSG00000054690	0.876219	0.480649	2035	1741	0.118	0.064	-0.866306	1.2e-08	0.00036475	down	Emcn
Cardiomyocytes	ENSMUSG00000048960	0.919357	0.501236	2035	1741	0.125	0.068	-0.875134	1.27e-09	3.88e-05	down	Prex2
Cardiomyocytes	ENSMUSG00000027684	1.33196	0.709411	2035	1741	0.159	0.09	-0.908863	6.47e-14	1.97e-09	down	Mecom
Cardiomyocytes	ENSMUSG00000067279	0.676251	0.349952	2035	1741	0.119	0.085	-0.950402	2.83e-13	8.64e-09	down	Ppp1r3c
Cardiomyocytes	ENSMUSG00000027165	0.654715	0.336508	2035	1741	0.115	0.081	-0.960226	8.97e-14	2.73e-09	down	B230118H07Rik
Cardiomyocytes	ENSMUSG00000044951	2.15651	1.10637	2035	1741	0.285	0.205	-0.962867	1.6e-25	4.89e-21	down	Mylk4
Cardiomyocytes	ENSMUSG00000024395	0.777621	0.392118	2035	1741	0.106	0.061	-0.987778	3.98e-09	0.000121287	down	Lims2
Cardiomyocytes	ENSMUSG00000046768	0.826835	0.402175	2035	1741	0.111	0.068	-1.03978	3.42e-09	0.000104231	down	Rhoj
Cardiomyocytes	ENSMUSG00000026154	0.76095	0.361454	2035	1741	0.127	0.077	-1.07399	6.55e-14	2e-09	down	Sdhaf4
Cardiomyocytes	ENSMUSG00000046756	0.589565	0.273263	2035	1741	0.108	0.071	-1.10936	5.99e-14	1.82e-09	down	Mrps7
Cardiomyocytes	ENSMUSG00000001240	0.89336	0.389125	2035	1741	0.128	0.065	-1.19901	1.05e-12	3.21e-08	down	Ramp2
Cardiomyocytes	ENSMUSG00000042745	0.886451	0.386025	2035	1741	0.132	0.064	-1.19935	3.25e-13	9.92e-09	down	Id1
Endocardial_cells	ENSMUSG00000058297	0.300029	0.806824	1311	1009	0.06	0.167	1.42715	8.97e-16	2.73e-11	up	Spock2
Endocardial_cells	ENSMUSG00000040896	0.302563	0.690942	1311	1009	0.048	0.112	1.19133	4.19e-08	0.00127849	up	Kcnd3
Endocardial_cells	ENSMUSG00000000031	2.0188	4.05822	1311	1009	0.201	0.357	1.00734	4.93e-16	1.5e-11	up	H19
Endocardial_cells	ENSMUSG00000034684	0.299864	0.568436	1311	1009	0.062	0.123	0.922691	5.46e-07	0.0166282	up	Sema3f
Endocardial_cells	ENSMUSG00000085177	0.287572	0.513556	1311	1009	0.056	0.114	0.8366	1.33e-07	0.0040496	up	Gm11209
Endocardial_cells	ENSMUSG00000030551	1.54182	2.74717	1311	1009	0.267	0.413	0.833312	3.65e-13	1.11e-08	up	Nr2f2
Endocardial_cells	ENSMUSG00000086040	0.963439	1.70174	1311	1009	0.172	0.302	0.82075	1.05e-12	3.19e-08	up	Wipf3
Endocardial_cells	ENSMUSG00000035681	2.37411	4.11972	1311	1009	0.178	0.267	0.795162	7.49e-07	0.0228182	up	Kcnc2
Endocardial_cells	ENSMUSG00000026843	0.277705	0.477337	1311	1009	0.055	0.108	0.781456	5.06e-07	0.0154258	up	Fubp3
Endocardial_cells	ENSMUSG00000027067	0.296763	0.509473	1311	1009	0.057	0.113	0.779696	9.4e-07	0.0286543	up	Ssrp1
Endocardial_cells	ENSMUSG00000026773	0.448563	0.767532	1311	1009	0.088	0.161	0.774915	7.98e-08	0.00243157	up	Pfkfb3
Endocardial_cells	ENSMUSG00000020092	0.285177	0.485236	1311	1009	0.059	0.113	0.766832	4.35e-07	0.0132661	up	Pald1
Endocardial_cells	ENSMUSG00000059013	0.390733	0.660723	1311	1009	0.08	0.147	0.757862	4.09e-07	0.012454	up	Sh2d3c
Endocardial_cells	ENSMUSG00000046020	0.26863	0.448799	1311	1009	0.054	0.106	0.740448	4.5e-07	0.0137042	up	Pofut1
Endocardial_cells	ENSMUSG00000026185	5.52456	9.18093	1311	1009	0.32	0.442	0.732781	5.26e-09	0.000160205	up	Igfbp5
Endocardial_cells	ENSMUSG00000034438	0.27115	0.4466	1311	1009	0.053	0.106	0.719891	1.15e-07	0.00350346	up	Gbp8
Endocardial_cells	ENSMUSG00000020032	0.711823	1.15006	1311	1009	0.116	0.193	0.692115	6.96e-07	0.0212115	up	Nuak1
Endocardial_cells	ENSMUSG00000032512	0.272403	0.439683	1311	1009	0.056	0.107	0.690721	2.58e-07	0.00787446	up	Wdr48
Endocardial_cells	ENSMUSG00000058013	0.770123	1.23564	1311	1009	0.146	0.239	0.682092	6.12e-08	0.00186608	up	Septin11
Endocardial_cells	ENSMUSG00000020601	0.273634	0.435898	1311	1009	0.055	0.106	0.671743	2.57e-07	0.00783915	up	Trib2
Endocardial_cells	ENSMUSG00000015053	0.876455	1.36875	1311	1009	0.156	0.259	0.64311	9.34e-10	2.85e-05	up	Gata2
Endocardial_cells	ENSMUSG00000044712	0.522104	0.811702	1311	1009	0.098	0.167	0.636612	1.63e-07	0.00496808	up	Slc38a6
Endocardial_cells	ENSMUSG00000009907	0.521779	0.810825	1311	1009	0.105	0.183	0.635951	8.32e-09	0.00025356	up	Vps4b
Endocardial_cells	ENSMUSG00000070643	0.336587	0.522941	1311	1009	0.063	0.122	0.635668	1.51e-08	0.000460935	up	Sox13
Endocardial_cells	ENSMUSG00000002603	0.579635	0.890553	1311	1009	0.114	0.189	0.619556	2.28e-07	0.00696311	up	Tgfb1
Endocardial_cells	ENSMUSG00000000531	0.514233	0.786041	1311	1009	0.105	0.173	0.612184	2.17e-07	0.00660497	up	Grasp
Endocardial_cells	ENSMUSG00000030341	0.795666	1.21458	1311	1009	0.159	0.248	0.610217	1.55e-07	0.00473036	up	Tnfrsf1a
Endocardial_cells	ENSMUSG00000066151	0.547129	0.83139	1311	1009	0.102	0.17	0.603646	3.53e-07	0.0107554	up	Fkbp15
Endocardial_cells	ENSMUSG00000040181	0.946294	1.43778	1311	1009	0.158	0.246	0.603481	1.64e-07	0.00500269	up	Fmo1
Endocardial_cells	ENSMUSG00000058396	1.69576	2.57489	1311	1009	0.291	0.432	0.602581	1.29e-11	3.94e-07	up	Gpr182
Endocardial_cells	ENSMUSG00000025579	0.573757	0.865282	1311	1009	0.114	0.191	0.592731	1.75e-08	0.000533406	up	Gaa
Endocardial_cells	ENSMUSG00000028233	0.461795	0.684021	1311	1009	0.082	0.151	0.56679	2.74e-09	8.35e-05	up	Tgs1
Endocardial_cells	ENSMUSG00000035212	0.64892	0.959791	1311	1009	0.13	0.216	0.564679	1.32e-09	4.03e-05	up	Leprot
Endocardial_cells	ENSMUSG00000016024	0.711087	1.04754	1311	1009	0.127	0.212	0.55891	1.12e-09	3.41e-05	up	Lbp
Endocardial_cells	ENSMUSG00000052299	0.552601	0.812037	1311	1009	0.113	0.176	0.555308	7.05e-07	0.0215003	up	Ltn1
Endocardial_cells	ENSMUSG00000041445	2.61158	3.83322	1311	1009	0.402	0.547	0.553635	2.61e-11	7.95e-07	up	Mmrn2
Endocardial_cells	ENSMUSG00000019173	0.394094	0.578196	1311	1009	0.077	0.134	0.553019	7.69e-08	0.00234361	up	Rab5c
Endocardial_cells	ENSMUSG00000021127	1.31637	1.92181	1311	1009	0.232	0.347	0.545898	1.75e-09	5.32e-05	up	Zfp36l1
Endocardial_cells	ENSMUSG00000022680	0.780651	1.13889	1311	1009	0.147	0.232	0.544872	3.89e-08	0.00118442	up	Pdxdc1
Endocardial_cells	ENSMUSG00000017493	2.53767	3.68912	1311	1009	0.358	0.491	0.539773	9.93e-10	3.03e-05	up	Igfbp4
Endocardial_cells	ENSMUSG00000057751	1.19577	1.73567	1311	1009	0.205	0.332	0.537555	5.49e-14	1.67e-09	up	Megf6
Endocardial_cells	ENSMUSG00000038143	2.0682	3.00089	1311	1009	0.258	0.36	0.537015	8.01e-07	0.0244018	up	Stox2
Endocardial_cells	ENSMUSG00000019854	0.536332	0.774056	1311	1009	0.102	0.167	0.529312	6.58e-07	0.0200537	up	Reps1
Endocardial_cells	ENSMUSG00000028108	1.60865	2.31523	1311	1009	0.267	0.386	0.525308	3.05e-09	9.29e-05	up	Ecm1
Endocardial_cells	ENSMUSG00000048118	0.693226	0.99448	1311	1009	0.124	0.206	0.520616	1.25e-09	3.81e-05	up	Arid4a
Endocardial_cells	ENSMUSG00000019539	0.735901	1.05442	1311	1009	0.137	0.219	0.518866	1.12e-08	0.000342086	up	Rcn3
Endocardial_cells	ENSMUSG00000003581	0.385613	0.551254	1311	1009	0.078	0.131	0.515563	1.96e-07	0.0059744	up	Rnf215
Endocardial_cells	ENSMUSG00000040865	0.89841	1.28357	1311	1009	0.172	0.261	0.51472	6.93e-08	0.00211143	up	Ino80d
Endocardial_cells	ENSMUSG00000069833	5.54196	7.87466	1311	1009	0.623	0.753	0.506821	4.43e-14	1.35e-09	up	Ahnak
Endocardial_cells	ENSMUSG00000067288	2.69797	3.82975	1311	1009	0.391	0.537	0.505377	1.12e-11	3.4e-07	up	Rps28
Endocardial_cells	ENSMUSG00000017774	0.765059	1.08332	1311	1009	0.145	0.226	0.50182	3.88e-08	0.00118164	up	Myo1c
Endocardial_cells	ENSMUSG00000031660	0.660221	0.934305	1311	1009	0.12	0.2	0.500944	1.53e-10	4.65e-06	up	Brd7
Endocardial_cells	ENSMUSG00000026796	0.545789	0.772061	1311	1009	0.106	0.176	0.50037	1.29e-08	0.000392611	up	Fam129b
Endocardial_cells	ENSMUSG00000031216	0.824079	1.16474	1311	1009	0.151	0.245	0.49915	2.7e-10	8.24e-06	up	Stard8
Endocardial_cells	ENSMUSG00000024975	0.775907	1.09298	1311	1009	0.146	0.228	0.494313	3.94e-08	0.00120202	up	Pdcd4
Endocardial_cells	ENSMUSG00000007872	2.92587	4.08361	1311	1009	0.405	0.531	0.48098	9.38e-09	0.00028576	up	Id3
Endocardial_cells	ENSMUSG00000059923	0.771147	1.07526	1311	1009	0.152	0.234	0.479609	1.86e-08	0.000568293	up	Grb2
Endocardial_cells	ENSMUSG00000037003	0.761116	1.06047	1311	1009	0.145	0.222	0.478516	9.12e-08	0.00278119	up	Tns2
Endocardial_cells	ENSMUSG00000086693	0.726877	1.00867	1311	1009	0.125	0.203	0.472674	7.33e-10	2.23e-05	up	A730081D07Rik
Endocardial_cells	ENSMUSG00000036155	0.685148	0.950292	1311	1009	0.125	0.198	0.471956	8.72e-08	0.0026573	up	Mgat5
Endocardial_cells	ENSMUSG00000025608	1.81736	2.51083	1311	1009	0.281	0.411	0.466323	6.66e-12	2.03e-07	up	Podxl
Endocardial_cells	ENSMUSG00000015961	0.430927	0.594794	1311	1009	0.088	0.143	0.464948	6.61e-07	0.020149	up	Adss
Endocardial_cells	ENSMUSG00000003458	0.524445	0.721883	1311	1009	0.106	0.176	0.460973	1.62e-10	4.93e-06	up	Ncstn
Endocardial_cells	ENSMUSG00000030824	1.15052	1.58028	1311	1009	0.201	0.308	0.457899	2.06e-10	6.28e-06	up	Nucb1
Endocardial_cells	ENSMUSG00000020130	0.471915	0.648104	1311	1009	0.095	0.152	0.457697	6.56e-07	0.0199907	up	Tbc1d15
Endocardial_cells	ENSMUSG00000014444	1.51045	2.07254	1311	1009	0.252	0.369	0.456424	7.32e-10	2.23e-05	up	Piezo1
Endocardial_cells	ENSMUSG00000025132	0.581285	0.797332	1311	1009	0.112	0.178	0.455934	3.29e-08	0.00100194	up	Arhgdia
Endocardial_cells	ENSMUSG00000075254	16.7939	23.0219	1311	1009	0.858	0.906	0.455071	9.25e-16	2.82e-11	up	Heg1
Endocardial_cells	ENSMUSG00000056692	0.614013	0.841025	1311	1009	0.114	0.182	0.45388	2.39e-09	7.3e-05	up	Ilrun
Endocardial_cells	ENSMUSG00000025278	2.32701	3.18273	1311	1009	0.365	0.495	0.451784	9.48e-10	2.89e-05	up	Flnb
Endocardial_cells	ENSMUSG00000117061	0.421056	0.57565	1311	1009	0.078	0.131	0.451179	8.07e-08	0.00246099	up	Gm49958
Endocardial_cells	ENSMUSG00000022982	0.784978	1.06997	1311	1009	0.15	0.233	0.446841	5.6e-10	1.71e-05	up	Sod1
Endocardial_cells	ENSMUSG00000110105	0.363655	0.495612	1311	1009	0.071	0.124	0.446642	1.09e-08	0.000333162	up	Gm45844
Endocardial_cells	ENSMUSG00000024104	0.411078	0.560111	1311	1009	0.077	0.127	0.446301	1.36e-06	0.041363	up	Washc2
Endocardial_cells	ENSMUSG00000029781	0.836788	1.13826	1311	1009	0.162	0.243	0.443899	2.04e-07	0.00622113	up	Fkbp9
Endocardial_cells	ENSMUSG00000021147	0.663268	0.900752	1311	1009	0.131	0.205	0.441539	4.85e-08	0.00147789	up	Wdr37
Endocardial_cells	ENSMUSG00000032440	2.39905	3.25606	1311	1009	0.356	0.479	0.440664	1.31e-08	0.000399612	up	Tgfbr2
Endocardial_cells	ENSMUSG00000020850	0.571107	0.77448	1311	1009	0.115	0.185	0.439467	2.79e-09	8.51e-05	up	Prpf8
Endocardial_cells	ENSMUSG00000007817	2.82999	3.83775	1311	1009	0.412	0.556	0.439464	3e-11	9.15e-07	up	Zmiz1
Endocardial_cells	ENSMUSG00000018899	0.431179	0.584443	1311	1009	0.081	0.136	0.438775	2.87e-08	0.000873967	up	Irf1
Endocardial_cells	ENSMUSG00000021756	6.77399	9.16718	1311	1009	0.655	0.757	0.436471	2.22e-09	6.76e-05	up	Il6st
Endocardial_cells	ENSMUSG00000001441	1.15887	1.56677	1311	1009	0.204	0.302	0.435078	4.01e-09	0.000122227	up	Npepps
Endocardial_cells	ENSMUSG00000040430	2.88231	3.89348	1311	1009	0.355	0.463	0.433835	5.52e-07	0.0168139	up	Pitpnc1
Endocardial_cells	ENSMUSG00000022665	3.06348	4.13252	1311	1009	0.43	0.568	0.431848	3.75e-10	1.14e-05	up	Ccdc80
Endocardial_cells	ENSMUSG00000030123	1.23597	1.66586	1311	1009	0.216	0.329	0.430618	5.4e-12	1.65e-07	up	Plxnd1
Endocardial_cells	ENSMUSG00000057440	0.712323	0.956645	1311	1009	0.129	0.193	0.425453	1.18e-06	0.0361095	up	Mpp7
Endocardial_cells	ENSMUSG00000053559	0.77252	1.03583	1311	1009	0.143	0.228	0.423149	6.08e-11	1.85e-06	up	Smagp
Endocardial_cells	ENSMUSG00000008398	2.95849	3.96677	1311	1009	0.429	0.552	0.423103	1.91e-08	0.000582799	up	Elk3
Endocardial_cells	ENSMUSG00000025647	1.34969	1.80807	1311	1009	0.235	0.348	0.421814	2.89e-11	8.81e-07	up	Shisa5
Endocardial_cells	ENSMUSG00000020134	1.14516	1.53283	1311	1009	0.195	0.303	0.420648	2.48e-13	7.57e-09	up	Peli1
Endocardial_cells	ENSMUSG00000017119	0.695924	0.930071	1311	1009	0.134	0.205	0.418411	2.33e-07	0.00709136	up	Nbr1
Endocardial_cells	ENSMUSG00000021474	0.543248	0.725342	1311	1009	0.106	0.166	0.417051	1.06e-06	0.032183	up	Sfxn1
Endocardial_cells	ENSMUSG00000030287	4.40857	5.88612	1311	1009	0.554	0.655	0.417005	5.63e-07	0.0171504	up	Itpr2
Endocardial_cells	ENSMUSG00000026775	1.1561	1.54288	1311	1009	0.213	0.314	0.416354	9.84e-10	3e-05	up	Yme1l1
Endocardial_cells	ENSMUSG00000019817	2.24262	2.9916	1311	1009	0.318	0.421	0.415732	1.63e-06	0.0496354	up	Plagl1
Endocardial_cells	ENSMUSG00000024030	0.378332	0.503887	1311	1009	0.076	0.122	0.413448	5.82e-07	0.0177347	up	Abcg1
Endocardial_cells	ENSMUSG00000031393	1.21464	1.61748	1311	1009	0.207	0.305	0.413224	1.21e-09	3.7e-05	up	Mecp2
Endocardial_cells	ENSMUSG00000034075	0.419436	0.556816	1311	1009	0.085	0.135	0.408751	4.56e-07	0.0139004	up	Zdhhc5
Endocardial_cells	ENSMUSG00000044167	1.1833	1.57069	1311	1009	0.202	0.29	0.408581	1.28e-07	0.00389018	up	Foxo1
Endocardial_cells	ENSMUSG00000024725	0.928816	1.232	1311	1009	0.171	0.248	0.40754	7.47e-07	0.0227626	up	Ostf1
Endocardial_cells	ENSMUSG00000022105	1.56911	2.08001	1311	1009	0.265	0.372	0.406644	2.09e-08	0.000635578	up	Rb1
Endocardial_cells	ENSMUSG00000037820	1.09951	1.45745	1311	1009	0.181	0.274	0.406587	1.42e-10	4.32e-06	up	Tgm2
Endocardial_cells	ENSMUSG00000028397	1.09339	1.44587	1311	1009	0.202	0.293	0.403125	1.53e-08	0.000465674	up	Kdm4c
Endocardial_cells	ENSMUSG00000016559	2.77165	3.66383	1311	1009	0.394	0.533	0.402605	5.13e-11	1.56e-06	up	H3f3b
Endocardial_cells	ENSMUSG00000001930	14.2326	18.7655	1311	1009	0.773	0.848	0.39889	1.08e-09	3.29e-05	up	Vwf
Endocardial_cells	ENSMUSG00000021638	0.348162	0.458926	1311	1009	0.066	0.112	0.398501	2.37e-08	0.000723155	up	Ocln
Endocardial_cells	ENSMUSG00000005803	0.383338	0.505241	1311	1009	0.072	0.12	0.398355	3.49e-08	0.00106356	up	Sqor
Endocardial_cells	ENSMUSG00000032097	1.90155	2.50145	1311	1009	0.328	0.431	0.395592	1.38e-06	0.0419111	up	Ddx6
Endocardial_cells	ENSMUSG00000028911	0.636588	0.835376	1311	1009	0.121	0.193	0.392065	3.23e-10	9.84e-06	up	Srsf4
Endocardial_cells	ENSMUSG00000081769	0.802963	1.0529	1311	1009	0.14	0.209	0.390966	3.48e-07	0.0106146	up	Gm12216
Endocardial_cells	ENSMUSG00000021669	1.52791	2.00183	1311	1009	0.265	0.364	0.389759	4.29e-07	0.0130797	up	Col4a3bp
Endocardial_cells	ENSMUSG00000020362	0.569893	0.7466	1311	1009	0.11	0.171	0.389645	2.69e-08	0.000820314	up	Cnot6
Endocardial_cells	ENSMUSG00000037553	0.483088	0.632561	1311	1009	0.091	0.148	0.388917	1.87e-09	5.71e-05	up	Zdhhc18
Endocardial_cells	ENSMUSG00000026977	1.48408	1.94211	1311	1009	0.272	0.377	0.38806	1.85e-08	0.00056485	up	Marchf7
Endocardial_cells	ENSMUSG00000034708	0.907232	1.18719	1311	1009	0.171	0.258	0.388004	1.26e-10	3.85e-06	up	Grn
Endocardial_cells	ENSMUSG00000001946	1.36791	1.78901	1311	1009	0.235	0.345	0.387187	3.38e-11	1.03e-06	up	Esam
Endocardial_cells	ENSMUSG00000026042	4.30134	5.62271	1311	1009	0.49	0.598	0.386478	6.74e-07	0.0205474	up	Col5a2
Endocardial_cells	ENSMUSG00000025558	5.1578	6.74042	1311	1009	0.597	0.731	0.38608	5.56e-11	1.7e-06	up	Dock9
Endocardial_cells	ENSMUSG00000024982	0.681665	0.890817	1311	1009	0.127	0.194	0.386067	5.14e-09	0.00015677	up	Zdhhc6
Endocardial_cells	ENSMUSG00000033386	0.822543	1.07394	1311	1009	0.148	0.223	0.384757	3.52e-08	0.00107288	up	Frrs1
Endocardial_cells	ENSMUSG00000020937	0.490598	0.639993	1311	1009	0.095	0.144	0.383513	1.17e-06	0.0356813	up	Plcd3
Endocardial_cells	ENSMUSG00000038193	0.665555	0.867047	1311	1009	0.124	0.189	0.381552	9.74e-08	0.00296723	up	Hand2
Endocardial_cells	ENSMUSG00000034709	0.359012	0.46691	1311	1009	0.069	0.112	0.379115	2.55e-07	0.0077608	up	Ppp1r21
Endocardial_cells	ENSMUSG00000004846	0.482675	0.627655	1311	1009	0.098	0.153	0.37892	6.62e-08	0.00201666	up	Plod3
Endocardial_cells	ENSMUSG00000022443	1.79807	2.33661	1311	1009	0.292	0.408	0.377967	7.27e-10	2.22e-05	up	Myh9
Endocardial_cells	ENSMUSG00000029458	0.377065	0.489773	1311	1009	0.069	0.112	0.3773	8.51e-07	0.0259371	up	Brap
Endocardial_cells	ENSMUSG00000001440	0.419816	0.545209	1311	1009	0.079	0.128	0.37705	1.33e-07	0.00404025	up	Kpnb1
Endocardial_cells	ENSMUSG00000045427	0.49407	0.641115	1311	1009	0.096	0.148	0.375869	3.16e-07	0.00961822	up	Hnrnph2
Endocardial_cells	ENSMUSG00000053799	0.996872	1.29088	1311	1009	0.168	0.244	0.372873	9.53e-08	0.00290372	up	Exoc6
Endocardial_cells	ENSMUSG00000022867	1.96396	2.54169	1311	1009	0.322	0.431	0.372024	3.92e-08	0.00119359	up	Usp25
Endocardial_cells	ENSMUSG00000001472	1.5827	2.04595	1311	1009	0.278	0.381	0.370382	1.97e-08	0.000601498	up	Tcf25
Endocardial_cells	ENSMUSG00000067336	5.53515	7.15342	1311	1009	0.602	0.728	0.370012	7.05e-10	2.15e-05	up	Bmpr2
Endocardial_cells	ENSMUSG00000026365	42.82	55.2673	1311	1009	0.971	0.973	0.368142	9.08e-17	2.77e-12	up	Cfh
Endocardial_cells	ENSMUSG00000027423	0.66148	0.85318	1311	1009	0.126	0.193	0.367153	5.76e-10	1.76e-05	up	Snx5
Endocardial_cells	ENSMUSG00000029713	0.712972	0.919243	1311	1009	0.139	0.212	0.366601	2.34e-09	7.13e-05	up	Gnb2
Endocardial_cells	ENSMUSG00000022816	2.90153	3.73552	1311	1009	0.421	0.554	0.364492	3.03e-10	9.24e-06	up	Fstl1
Endocardial_cells	ENSMUSG00000021432	0.750753	0.965698	1311	1009	0.142	0.211	0.363234	4.2e-09	0.000128028	up	Slc35b3
Endocardial_cells	ENSMUSG00000008305	1.41687	1.82185	1311	1009	0.235	0.325	0.362698	2.8e-07	0.0085271	up	Tle1
Endocardial_cells	ENSMUSG00000042208	0.4632	0.595444	1311	1009	0.088	0.14	0.362331	1.85e-08	0.000562874	up	0610010F05Rik
Endocardial_cells	ENSMUSG00000074793	0.957612	1.23082	1311	1009	0.168	0.242	0.362101	8.42e-08	0.00256534	up	Hspa12b
Endocardial_cells	ENSMUSG00000056492	5.13046	6.587	1311	1009	0.582	0.721	0.360533	2.75e-11	8.38e-07	up	Adgrf5
Endocardial_cells	ENSMUSG00000021357	0.93351	1.19853	1311	1009	0.169	0.246	0.360524	9.49e-09	0.000289177	up	Exoc2
Endocardial_cells	ENSMUSG00000079562	0.447994	0.575116	1311	1009	0.086	0.137	0.360374	4.2e-08	0.0012798	up	Maea
Endocardial_cells	ENSMUSG00000038612	1.76455	1.37359	1311	1009	0.288	0.291	-0.361346	1.85e-11	5.65e-07	down	Mcl1
Endocardial_cells	ENSMUSG00000019054	0.883417	0.685659	1311	1009	0.16	0.158	-0.365603	7.16e-07	0.0218109	down	Fis1
Endocardial_cells	ENSMUSG00000062127	0.938076	0.725309	1311	1009	0.158	0.165	-0.371109	9.27e-09	0.000282563	down	Cttnbp2nl
Endocardial_cells	ENSMUSG00000006304	1.79302	1.37218	1311	1009	0.308	0.282	-0.385921	9.31e-08	0.00283773	down	Arpc2
Endocardial_cells	ENSMUSG00000032925	5.11167	3.90365	1311	1009	0.428	0.324	-0.388972	1.57e-06	0.0478929	down	Itgbl1
Endocardial_cells	ENSMUSG00000019210	0.713668	0.542323	1311	1009	0.138	0.135	-0.396101	5.16e-07	0.0157309	down	Atp6v1e1
Endocardial_cells	ENSMUSG00000040446	1.2847	0.963913	1311	1009	0.214	0.206	-0.414454	7.85e-09	0.000239404	down	Rprd1a
Endocardial_cells	ENSMUSG00000028945	1.11003	0.827088	1311	1009	0.196	0.181	-0.424485	3.2e-08	0.000976591	down	Rheb
Endocardial_cells	ENSMUSG00000021365	1.40988	1.04752	1311	1009	0.216	0.202	-0.428586	2.06e-07	0.0062852	down	Nedd9
Endocardial_cells	ENSMUSG00000053641	2.35329	1.73755	1311	1009	0.292	0.297	-0.437624	1.18e-10	3.59e-06	down	Dennd4a
Endocardial_cells	ENSMUSG00000054280	0.527079	0.389156	1311	1009	0.101	0.101	-0.437673	1.32e-07	0.00402828	down	Prr14l
Endocardial_cells	ENSMUSG00000032846	3.31006	2.3834	1311	1009	0.427	0.372	-0.473838	1.09e-08	0.00033192	down	Zswim6
Endocardial_cells	ENSMUSG00000060477	1.01256	0.722224	1311	1009	0.178	0.158	-0.487494	1.18e-06	0.0360927	down	Irak2
Endocardial_cells	ENSMUSG00000038876	0.529901	0.377271	1311	1009	0.107	0.098	-0.490124	3.58e-07	0.0108995	down	Rnf146
Endocardial_cells	ENSMUSG00000058799	0.804851	0.569282	1311	1009	0.15	0.135	-0.499577	2.4e-07	0.00731796	down	Nap1l1
Endocardial_cells	ENSMUSG00000028111	0.758746	0.526347	1311	1009	0.135	0.124	-0.527604	4.42e-08	0.00134721	down	Ctsk
Endocardial_cells	ENSMUSG00000030304	0.810308	0.555492	1311	1009	0.153	0.135	-0.544703	1.12e-06	0.0340222	down	Ergic2
Endocardial_cells	ENSMUSG00000056121	1.04901	0.715262	1311	1009	0.178	0.167	-0.552482	4.92e-11	1.5e-06	down	Fez2
Endocardial_cells	ENSMUSG00000062991	11.7244	7.82899	1311	1009	0.401	0.286	-0.582617	1.74e-08	0.000529732	down	Nrg1
Endocardial_cells	ENSMUSG00000024516	0.625793	0.372059	1311	1009	0.119	0.101	-0.750154	3e-10	9.14e-06	down	Sec11c
Endocardial_cells	ENSMUSG00000021798	1.32061	0.771325	1311	1009	0.229	0.14	-0.775792	1.25e-08	0.00038035	down	Ldb3
Endocardial_cells	ENSMUSG00000051934	2.9809	1.72177	1311	1009	0.292	0.28	-0.791856	3.62e-14	1.1e-09	down	Spats2
Endocardial_cells	ENSMUSG00000086720	0.70631	0.40039	1311	1009	0.121	0.094	-0.818896	7.61e-08	0.00231899	down	Plxna4os3
Endocardial_cells	ENSMUSG00000016528	1.15191	0.617009	1311	1009	0.197	0.143	-0.900659	1.73e-11	5.27e-07	down	Mapkapk2
Endocardial_cells	ENSMUSG00000031613	1.73609	0.903909	1311	1009	0.177	0.138	-0.941596	5.45e-07	0.0166076	down	Hpgd
Endocardial_cells	ENSMUSG00000024190	0.676898	0.350295	1311	1009	0.127	0.084	-0.950371	9.76e-07	0.0297432	down	Dusp1
Endothelial_cells	ENSMUSG00000025498	0.0953352	0.772437	2402	2880	0.017	0.144	3.01834	1.01e-68	3.06e-64	up	Irf7
Endothelial_cells	ENSMUSG00000030107	0.14352	0.686295	2402	2880	0.027	0.127	2.25758	7.32e-43	2.23e-38	up	Usp18
Endothelial_cells	ENSMUSG00000045932	0.311606	1.41618	2402	2880	0.048	0.205	2.18421	3.65e-67	1.11e-62	up	Ifit2
Endothelial_cells	ENSMUSG00000028268	0.172938	0.776223	2402	2880	0.034	0.142	2.16622	1.97e-44	6e-40	up	Gbp3
Endothelial_cells	ENSMUSG00000020638	0.175867	0.618575	2402	2880	0.032	0.111	1.81446	2.63e-29	8.02e-25	up	Cmpk2
Endothelial_cells	ENSMUSG00000037661	0.260921	0.827674	2402	2880	0.04	0.139	1.66545	9.12e-37	2.78e-32	up	Gpr160
Endothelial_cells	ENSMUSG00000020178	0.333959	0.856317	2402	2880	0.061	0.159	1.35847	2.51e-29	7.66e-25	up	Adora2a
Endothelial_cells	ENSMUSG00000040283	2.32107	5.95126	2402	2880	0.263	0.512	1.3584	3.96e-85	1.21e-80	up	Btnl9
Endothelial_cells	ENSMUSG00000020641	1.26906	3.04154	2402	2880	0.159	0.347	1.26104	1.27e-54	3.88e-50	up	Rsad2
Endothelial_cells	ENSMUSG00000030889	1.7008	3.78034	2402	2880	0.231	0.423	1.1523	5.52e-51	1.68e-46	up	Vwa3a
Endothelial_cells	ENSMUSG00000078921	0.358825	0.797505	2402	2880	0.06	0.141	1.15221	3.67e-23	1.12e-18	up	Tgtp2
Endothelial_cells	ENSMUSG00000029417	0.320862	0.70726	2402	2880	0.051	0.114	1.14029	1.94e-16	5.92e-12	up	Cxcl9
Endothelial_cells	ENSMUSG00000048636	0.918647	2.00429	2402	2880	0.127	0.262	1.12551	2.46e-34	7.51e-30	up	A730049H05Rik
Endothelial_cells	ENSMUSG00000021662	0.947326	2.00559	2402	2880	0.144	0.279	1.08209	3.25e-32	9.9e-28	up	Arhgef28
Endothelial_cells	ENSMUSG00000030657	0.414472	0.87022	2402	2880	0.063	0.124	1.07011	3.02e-13	9.2e-09	up	Xylt1
Endothelial_cells	ENSMUSG00000105504	0.480534	0.99248	2402	2880	0.08	0.175	1.0464	3.06e-25	9.34e-21	up	Gbp5
Endothelial_cells	ENSMUSG00000042834	0.261684	0.53647	2402	2880	0.048	0.107	1.03567	1.59e-16	4.83e-12	up	Nrep
Endothelial_cells	ENSMUSG00000046080	0.407517	0.811265	2402	2880	0.067	0.135	0.993313	1.02e-15	3.1e-11	up	Clec9a
Endothelial_cells	ENSMUSG00000016496	0.368776	0.733488	2402	2880	0.064	0.13	0.992027	1.26e-15	3.85e-11	up	Cd274
Endothelial_cells	ENSMUSG00000021223	0.381952	0.750079	2402	2880	0.062	0.129	0.973651	5.99e-17	1.83e-12	up	Papln
Endothelial_cells	ENSMUSG00000028427	1.39032	2.72024	2402	2880	0.216	0.383	0.968315	3.24e-39	9.87e-35	up	Aqp7
Endothelial_cells	ENSMUSG00000028996	1.38145	2.684	2402	2880	0.167	0.311	0.958207	3.98e-33	1.21e-28	up	Rbp7
Endothelial_cells	ENSMUSG00000018986	0.504443	0.965271	2402	2880	0.081	0.16	0.936245	2.34e-18	7.14e-14	up	Slfn3
Endothelial_cells	ENSMUSG00000000805	1.54289	2.87847	2402	2880	0.209	0.366	0.89967	5.71e-35	1.74e-30	up	Car4
Endothelial_cells	ENSMUSG00000108141	0.324647	0.602347	2402	2880	0.05	0.102	0.891724	9.31e-13	2.84e-08	up	Gm44079
Endothelial_cells	ENSMUSG00000035919	1.29991	2.39326	2402	2880	0.181	0.291	0.880567	5.87e-20	1.79e-15	up	Bbs9
Endothelial_cells	ENSMUSG00000060568	0.768744	1.3955	2402	2880	0.129	0.223	0.860203	6.19e-18	1.89e-13	up	Fam78b
Endothelial_cells	ENSMUSG00000028713	1.2283	2.22971	2402	2880	0.185	0.325	0.860185	2.72e-30	8.29e-26	up	Cyp4b1
Endothelial_cells	ENSMUSG00000028121	0.434037	0.775736	2402	2880	0.069	0.136	0.837748	1.37e-16	4.16e-12	up	Bcar3
Endothelial_cells	ENSMUSG00000040447	0.413015	0.738109	2402	2880	0.076	0.145	0.837638	1.62e-15	4.95e-11	up	Spns2
Endothelial_cells	ENSMUSG00000041852	0.589684	1.04375	2402	2880	0.099	0.173	0.823766	4.06e-14	1.24e-09	up	Tcf20
Endothelial_cells	ENSMUSG00000025915	0.588785	1.0401	2402	2880	0.1	0.179	0.820916	1.3e-16	3.95e-12	up	Sgk3
Endothelial_cells	ENSMUSG00000026890	0.327603	0.577663	2402	2880	0.057	0.108	0.818278	4.08e-12	1.24e-07	up	Lhx6
Endothelial_cells	ENSMUSG00000020682	0.344243	0.603352	2402	2880	0.061	0.11	0.809572	1.14e-09	3.48e-05	up	Mmp28
Endothelial_cells	ENSMUSG00000038296	4.3003	7.52573	2402	2880	0.466	0.629	0.807394	1.26e-40	3.85e-36	up	Galnt18
Endothelial_cells	ENSMUSG00000026880	0.428651	0.749442	2402	2880	0.075	0.143	0.806014	2.51e-16	7.66e-12	up	Stom
Endothelial_cells	ENSMUSG00000026991	5.73443	10.0029	2402	2880	0.538	0.695	0.802696	6.85e-51	2.09e-46	up	Pkp4
Endothelial_cells	ENSMUSG00000021759	4.06961	7.08457	2402	2880	0.458	0.617	0.799791	8.33e-42	2.54e-37	up	Plpp1
Endothelial_cells	ENSMUSG00000041378	2.05823	3.5661	2402	2880	0.237	0.378	0.792943	2.08e-27	6.34e-23	up	Cldn5
Endothelial_cells	ENSMUSG00000060206	0.814743	1.41147	2402	2880	0.128	0.213	0.792776	1.67e-15	5.08e-11	up	Zfp462
Endothelial_cells	ENSMUSG00000027580	0.457373	0.789335	2402	2880	0.079	0.152	0.787266	4.32e-18	1.32e-13	up	Helz2
Endothelial_cells	ENSMUSG00000037936	0.808176	1.39403	2402	2880	0.136	0.223	0.786521	1.83e-15	5.59e-11	up	Scarb1
Endothelial_cells	ENSMUSG00000038172	0.623281	1.06949	2402	2880	0.11	0.19	0.778971	6.05e-16	1.84e-11	up	Ttc39b
Endothelial_cells	ENSMUSG00000062515	50.9794	86.9291	2402	2880	0.968	0.982	0.769926	5.28e-88	1.61e-83	up	Fabp4
Endothelial_cells	ENSMUSG00000071001	0.440818	0.750813	2402	2880	0.08	0.146	0.768271	2.17e-15	6.62e-11	up	Hrct1
Endothelial_cells	ENSMUSG00000114048	0.35593	0.603189	2402	2880	0.059	0.107	0.761016	5.5e-11	1.68e-06	up	4930549C15Rik
Endothelial_cells	ENSMUSG00000033174	9.21521	15.5824	2402	2880	0.708	0.828	0.757832	9.21e-75	2.81e-70	up	Mgll
Endothelial_cells	ENSMUSG00000021294	0.352505	0.591157	2402	2880	0.066	0.118	0.745897	3.86e-11	1.18e-06	up	Kif26a
Endothelial_cells	ENSMUSG00000031217	0.690388	1.1574	2402	2880	0.114	0.207	0.745408	3.38e-20	1.03e-15	up	Efnb1
Endothelial_cells	ENSMUSG00000039578	0.60076	1.00604	2402	2880	0.084	0.137	0.743832	6.41e-09	0.000195312	up	Ccser1
Endothelial_cells	ENSMUSG00000051864	1.12251	1.87767	2402	2880	0.182	0.302	0.74221	1.91e-23	5.82e-19	up	Tbc1d22a
Endothelial_cells	ENSMUSG00000039046	0.607775	1.01528	2402	2880	0.102	0.188	0.740271	6.39e-21	1.95e-16	up	Usp6nl
Endothelial_cells	ENSMUSG00000029581	0.33214	0.552995	2402	2880	0.061	0.116	0.735474	9.98e-15	3.04e-10	up	Fscn1
Endothelial_cells	ENSMUSG00000051375	0.692351	1.15196	2402	2880	0.125	0.215	0.73452	1.89e-18	5.76e-14	up	Pcdh1
Endothelial_cells	ENSMUSG00000030737	0.630566	1.04578	2402	2880	0.103	0.164	0.729856	4.13e-10	1.26e-05	up	Slco2b1
Endothelial_cells	ENSMUSG00000027217	1.21884	2.02122	2402	2880	0.187	0.307	0.729724	8.76e-24	2.67e-19	up	Tspan18
Endothelial_cells	ENSMUSG00000038175	0.677298	1.12136	2402	2880	0.112	0.187	0.727386	3.69e-14	1.12e-09	up	Mylip
Endothelial_cells	ENSMUSG00000049044	2.14929	3.55703	2402	2880	0.281	0.407	0.726815	4.71e-22	1.43e-17	up	Rapgef4
Endothelial_cells	ENSMUSG00000024948	0.533872	0.875783	2402	2880	0.091	0.157	0.714081	3.92e-14	1.2e-09	up	Map4k2
Endothelial_cells	ENSMUSG00000020451	0.442173	0.724898	2402	2880	0.078	0.131	0.713166	6.11e-10	1.86e-05	up	Limk2
Endothelial_cells	ENSMUSG00000051335	1.57817	2.56622	2402	2880	0.218	0.336	0.701391	1.05e-20	3.19e-16	up	Gfod1
Endothelial_cells	ENSMUSG00000019866	0.365322	0.592885	2402	2880	0.062	0.114	0.698585	7.76e-13	2.37e-08	up	Crybg1
Endothelial_cells	ENSMUSG00000066621	0.694637	1.12476	2402	2880	0.117	0.201	0.695285	3.35e-18	1.02e-13	up	Tecpr1
Endothelial_cells	ENSMUSG00000041870	0.365716	0.587879	2402	2880	0.07	0.119	0.684797	3.64e-10	1.11e-05	up	Ankrd13a
Endothelial_cells	ENSMUSG00000024970	0.306964	0.49206	2402	2880	0.056	0.108	0.680763	4.57e-15	1.39e-10	up	Spindoc
Endothelial_cells	ENSMUSG00000039087	1.63643	2.62097	2402	2880	0.251	0.386	0.679544	1.14e-24	3.49e-20	up	Rreb1
Endothelial_cells	ENSMUSG00000028483	1.02704	1.6444	2402	2880	0.17	0.282	0.679072	4.63e-23	1.41e-18	up	Snapc3
Endothelial_cells	ENSMUSG00000050271	1.23926	1.98177	2402	2880	0.19	0.303	0.677311	2.62e-21	7.98e-17	up	Prag1
Endothelial_cells	ENSMUSG00000041729	0.9344	1.49036	2402	2880	0.154	0.264	0.673545	8.49e-24	2.59e-19	up	Coro2b
Endothelial_cells	ENSMUSG00000019790	1.15812	1.84279	2402	2880	0.19	0.289	0.670111	3.11e-16	9.49e-12	up	Stxbp5
Endothelial_cells	ENSMUSG00000050530	1.59999	2.53759	2402	2880	0.242	0.378	0.66539	6.53e-26	1.99e-21	up	Fam171a1
Endothelial_cells	ENSMUSG00000021065	1.93256	3.06036	2402	2880	0.26	0.358	0.663184	1.82e-14	5.54e-10	up	Fut8
Endothelial_cells	ENSMUSG00000035566	1.38217	2.18128	2402	2880	0.182	0.254	0.658244	1.61e-09	4.9e-05	up	Pcdh17
Endothelial_cells	ENSMUSG00000024338	0.686744	1.08204	2402	2880	0.122	0.203	0.655912	1.66e-16	5.05e-12	up	Psmb8
Endothelial_cells	ENSMUSG00000019256	0.814644	1.28307	2402	2880	0.129	0.221	0.655355	3.98e-20	1.21e-15	up	Ahr
Endothelial_cells	ENSMUSG00000031639	0.341784	0.537384	2402	2880	0.061	0.105	0.652868	1.42e-09	4.31e-05	up	Tlr3
Endothelial_cells	ENSMUSG00000048264	3.25066	5.10049	2402	2880	0.408	0.549	0.649902	2.09e-26	6.37e-22	up	Dip2c
Endothelial_cells	ENSMUSG00000024887	0.637067	0.99737	2402	2880	0.106	0.18	0.646685	4.12e-15	1.26e-10	up	Asah2
Endothelial_cells	ENSMUSG00000025006	4.88111	7.63653	2402	2880	0.539	0.668	0.645708	7.45e-32	2.27e-27	up	Sorbs1
Endothelial_cells	ENSMUSG00000041488	0.509755	0.793448	2402	2880	0.092	0.153	0.638331	2.72e-12	8.28e-08	up	Stx3
Endothelial_cells	ENSMUSG00000021277	0.366572	0.567774	2402	2880	0.061	0.104	0.631221	5.34e-09	0.000162742	up	Traf3
Endothelial_cells	ENSMUSG00000028677	1.38078	2.13765	2402	2880	0.167	0.233	0.630539	1.46e-08	0.000445261	up	Rnf220
Endothelial_cells	ENSMUSG00000042105	0.35182	0.544456	2402	2880	0.065	0.106	0.62998	2.54e-08	0.000774586	up	Inpp5f
Endothelial_cells	ENSMUSG00000022894	1.03561	1.60208	2402	2880	0.133	0.211	0.629467	1.76e-13	5.36e-09	up	Adamts5
Endothelial_cells	ENSMUSG00000030411	1.20939	1.8707	2402	2880	0.196	0.31	0.6293	4.29e-22	1.31e-17	up	Nova2
Endothelial_cells	ENSMUSG00000041477	0.354272	0.547164	2402	2880	0.061	0.107	0.627114	1.02e-10	3.1e-06	up	Dcp1b
Endothelial_cells	ENSMUSG00000010047	0.311667	0.479447	2402	2880	0.057	0.103	0.621366	1.6e-13	4.87e-09	up	Hyal2
Endothelial_cells	ENSMUSG00000038305	0.445367	0.680578	2402	2880	0.072	0.121	0.611765	2.84e-10	8.66e-06	up	Spats2l
Endothelial_cells	ENSMUSG00000029407	0.505108	0.771127	2402	2880	0.093	0.144	0.610377	2.57e-08	0.00078341	up	Uso1
Endothelial_cells	ENSMUSG00000033082	1.76089	2.68043	2402	2880	0.256	0.383	0.60616	3.09e-22	9.4e-18	up	Clec1a
Endothelial_cells	ENSMUSG00000031841	8.57051	13.0005	2402	2880	0.608	0.699	0.601113	4.29e-22	1.31e-17	up	Cdh13
Endothelial_cells	ENSMUSG00000021687	0.404987	0.613556	2402	2880	0.074	0.12	0.599319	7.17e-09	0.000218516	up	Scamp1
Endothelial_cells	ENSMUSG00000085439	0.427165	0.645192	2402	2880	0.067	0.111	0.594935	1.28e-09	3.91e-05	up	Rapgef4os1
Endothelial_cells	ENSMUSG00000032006	9.89426	14.9405	2402	2880	0.659	0.724	0.594569	6.62e-27	2.02e-22	up	Pdgfd
Endothelial_cells	ENSMUSG00000031538	0.401156	0.605516	2402	2880	0.066	0.111	0.594004	7.99e-10	2.43e-05	up	Plat
Endothelial_cells	ENSMUSG00000037580	0.391105	0.590296	2402	2880	0.072	0.111	0.593885	1.35e-06	0.0411995	up	Gch1
Endothelial_cells	ENSMUSG00000039706	5.05387	7.62088	2402	2880	0.458	0.577	0.592567	3.39e-21	1.03e-16	up	Ldb2
Endothelial_cells	ENSMUSG00000022678	0.385389	0.578825	2402	2880	0.072	0.116	0.586813	3.88e-09	0.000118133	up	Nde1
Endothelial_cells	ENSMUSG00000005893	1.04077	1.56064	2402	2880	0.167	0.256	0.584489	1.34e-15	4.07e-11	up	Nr2c2
Endothelial_cells	ENSMUSG00000031918	0.583662	0.872914	2402	2880	0.103	0.167	0.580708	3.2e-13	9.75e-09	up	Mtmr2
Endothelial_cells	ENSMUSG00000025584	1.17717	1.74559	2402	2880	0.192	0.283	0.568392	1.11e-14	3.38e-10	up	Pde8a
Endothelial_cells	ENSMUSG00000021668	0.398557	0.587383	2402	2880	0.071	0.113	0.559515	3.36e-08	0.00102526	up	Polk
Endothelial_cells	ENSMUSG00000038116	0.864824	1.27191	2402	2880	0.145	0.215	0.556519	3.27e-11	9.96e-07	up	Phf20
Endothelial_cells	ENSMUSG00000023067	0.45895	0.67398	2402	2880	0.081	0.124	0.55437	1.15e-07	0.00350865	up	Cdkn1a
Endothelial_cells	ENSMUSG00000041633	0.671433	0.984343	2402	2880	0.102	0.16	0.551918	2.8e-11	8.53e-07	up	Kctd12b
Endothelial_cells	ENSMUSG00000038235	1.46635	2.14945	2402	2880	0.231	0.344	0.551739	2.75e-20	8.38e-16	up	F11r
Endothelial_cells	ENSMUSG00000022537	0.539291	0.790142	2402	2880	0.095	0.153	0.551046	1.36e-12	4.15e-08	up	Tmem44
Endothelial_cells	ENSMUSG00000016458	0.575288	0.842687	2402	2880	0.092	0.152	0.550712	4.8e-15	1.46e-10	up	Wt1
Endothelial_cells	ENSMUSG00000006526	0.380429	0.556986	2402	2880	0.072	0.11	0.550013	1.11e-06	0.0337665	up	Stimate
Endothelial_cells	ENSMUSG00000071856	7.43444	10.8816	2402	2880	0.61	0.722	0.549593	2.42e-26	7.38e-22	up	Mcc
Endothelial_cells	ENSMUSG00000085171	0.646385	0.945588	2402	2880	0.105	0.169	0.548819	1.87e-13	5.7e-09	up	D830026I12Rik
Endothelial_cells	ENSMUSG00000049521	0.678669	0.990952	2402	2880	0.119	0.193	0.546106	2.06e-16	6.28e-12	up	Cdc42ep1
Endothelial_cells	ENSMUSG00000021969	0.979742	1.42971	2402	2880	0.166	0.25	0.545248	7.7e-15	2.35e-10	up	Zdhhc20
Endothelial_cells	ENSMUSG00000001120	0.481697	0.702848	2402	2880	0.075	0.122	0.545087	1.38e-09	4.22e-05	up	Pcbp3
Endothelial_cells	ENSMUSG00000047907	7.4187	10.8184	2402	2880	0.59	0.653	0.544248	3.48e-22	1.06e-17	up	Tshz2
Endothelial_cells	ENSMUSG00000034911	2.85626	4.16201	2402	2880	0.384	0.527	0.543153	4.09e-24	1.25e-19	up	Ushbp1
Endothelial_cells	ENSMUSG00000036206	0.497538	0.724426	2402	2880	0.09	0.143	0.54203	1.35e-11	4.12e-07	up	Sh3bp4
Endothelial_cells	ENSMUSG00000015133	1.14124	1.65964	2402	2880	0.189	0.267	0.54027	2.98e-11	9.09e-07	up	Lrrk1
Endothelial_cells	ENSMUSG00000097154	0.692453	1.00458	2402	2880	0.115	0.178	0.536799	7.57e-12	2.31e-07	up	Gm26510
Endothelial_cells	ENSMUSG00000001576	0.77599	1.12537	2402	2880	0.139	0.2	0.536286	1.5e-08	0.000456168	up	Ergic1
Endothelial_cells	ENSMUSG00000032035	4.70312	6.8079	2402	2880	0.528	0.644	0.53359	2.75e-24	8.37e-20	up	Ets1
Endothelial_cells	ENSMUSG00000041134	14.4068	20.7857	2402	2880	0.804	0.854	0.528846	6.18e-40	1.88e-35	up	Cyyr1
Endothelial_cells	ENSMUSG00000059288	0.631361	0.910001	2402	2880	0.106	0.161	0.527404	1.03e-09	3.14e-05	up	Cdyl
Endothelial_cells	ENSMUSG00000033352	1.05884	1.52489	2402	2880	0.177	0.259	0.526225	2.08e-13	6.33e-09	up	Map2k4
Endothelial_cells	ENSMUSG00000031511	0.849764	1.223	2402	2880	0.142	0.215	0.525291	5.93e-13	1.81e-08	up	Arhgef7
Endothelial_cells	ENSMUSG00000051177	12.2458	17.6072	2402	2880	0.716	0.776	0.523878	2.74e-30	8.34e-26	up	Plcb1
Endothelial_cells	ENSMUSG00000052155	1.45638	2.09235	2402	2880	0.211	0.309	0.522738	7.97e-16	2.43e-11	up	Acvr2a
Endothelial_cells	ENSMUSG00000032290	0.60156	0.863739	2402	2880	0.098	0.151	0.521886	3.58e-10	1.09e-05	up	Ptpn9
Endothelial_cells	ENSMUSG00000041187	1.29417	1.85619	2402	2880	0.199	0.296	0.520325	1.27e-16	3.87e-12	up	Prkd2
Endothelial_cells	ENSMUSG00000031145	0.379271	0.543804	2402	2880	0.067	0.104	0.519858	2.8e-08	0.000853082	up	Prickle3
Endothelial_cells	ENSMUSG00000035168	4.08501	5.85451	2402	2880	0.487	0.613	0.519207	1.45e-21	4.41e-17	up	Tanc1
Endothelial_cells	ENSMUSG00000046442	0.464656	0.664713	2402	2880	0.07	0.108	0.516568	1.26e-06	0.0383846	up	Ppm1e
Endothelial_cells	ENSMUSG00000010721	1.09451	1.56492	2402	2880	0.171	0.243	0.515805	3.29e-10	1e-05	up	Lmbr1
Endothelial_cells	ENSMUSG00000026470	0.530314	0.756735	2402	2880	0.092	0.138	0.512942	9.41e-08	0.0028684	up	Stx6
Endothelial_cells	ENSMUSG00000054556	0.885304	1.2627	2402	2880	0.13	0.181	0.512262	1.53e-06	0.0466909	up	Gm4876
Endothelial_cells	ENSMUSG00000036943	0.685142	0.972697	2402	2880	0.12	0.173	0.505587	4.02e-08	0.00122557	up	Rab8b
Endothelial_cells	ENSMUSG00000021990	1.06912	1.51636	2402	2880	0.172	0.248	0.50419	1.82e-11	5.55e-07	up	Spata13
Endothelial_cells	ENSMUSG00000085264	3.29877	4.65784	2402	2880	0.401	0.512	0.497732	2.41e-15	7.36e-11	up	Gm15581
Endothelial_cells	ENSMUSG00000034612	1.26939	1.79135	2402	2880	0.197	0.284	0.496919	3.36e-14	1.03e-09	up	Chst11
Endothelial_cells	ENSMUSG00000024781	0.639425	0.901535	2402	2880	0.112	0.17	0.495609	4.68e-11	1.43e-06	up	Lipa
Endothelial_cells	ENSMUSG00000031684	1.20539	1.69934	2402	2880	0.189	0.276	0.49548	1.49e-14	4.55e-10	up	Slc10a7
Endothelial_cells	ENSMUSG00000000184	0.75335	1.06147	2402	2880	0.13	0.187	0.494664	1.3e-08	0.00039501	up	Ccnd2
Endothelial_cells	ENSMUSG00000036402	1.1037	1.55402	2402	2880	0.182	0.249	0.493659	1.04e-08	0.000316549	up	Gng12
Endothelial_cells	ENSMUSG00000070056	1.33448	1.87744	2402	2880	0.208	0.297	0.492491	2.02e-13	6.16e-09	up	Mfhas1
Endothelial_cells	ENSMUSG00000038291	0.755557	1.06271	2402	2880	0.119	0.174	0.492136	1.23e-09	3.76e-05	up	Snx25
Endothelial_cells	ENSMUSG00000021540	0.532621	0.748893	2402	2880	0.099	0.147	0.49165	4.29e-08	0.00130826	up	Smad5
Endothelial_cells	ENSMUSG00000018750	0.534885	0.751981	2402	2880	0.095	0.148	0.491468	1.44e-12	4.38e-08	up	Zbtb4
Endothelial_cells	ENSMUSG00000035011	0.553162	0.776737	2402	2880	0.101	0.152	0.489724	2.33e-09	7.11e-05	up	Zbtb7a
Endothelial_cells	ENSMUSG00000040738	0.664566	0.932919	2402	2880	0.114	0.172	0.489339	3.18e-11	9.7e-07	up	Ints8
Endothelial_cells	ENSMUSG00000042211	0.378336	0.530855	2402	2880	0.071	0.11	0.488651	3.03e-08	0.000922053	up	Fbxo38
Endothelial_cells	ENSMUSG00000038002	0.657859	0.922652	2402	2880	0.113	0.174	0.488007	2.01e-12	6.12e-08	up	Cramp1l
Endothelial_cells	ENSMUSG00000032735	5.29759	7.42791	2402	2880	0.504	0.603	0.487621	3.07e-16	9.36e-12	up	Ablim3
Endothelial_cells	ENSMUSG00000029064	2.65574	3.71659	2402	2880	0.385	0.52	0.484866	7.64e-22	2.33e-17	up	Gnb1
Endothelial_cells	ENSMUSG00000060450	0.637506	0.891111	2402	2880	0.112	0.174	0.483166	2.67e-13	8.14e-09	up	Rnf14
Endothelial_cells	ENSMUSG00000024462	0.401691	0.561326	2402	2880	0.073	0.111	0.482754	2.2e-08	0.000669167	up	Gabbr1
Endothelial_cells	ENSMUSG00000071379	1.61057	2.25008	2402	2880	0.25	0.335	0.482411	6.6e-11	2.01e-06	up	Hpcal1
Endothelial_cells	ENSMUSG00000055371	0.484093	0.675677	2402	2880	0.081	0.133	0.481051	3.58e-13	1.09e-08	up	Stam2
Endothelial_cells	ENSMUSG00000038007	1.1123	1.54825	2402	2880	0.162	0.235	0.477094	2.57e-11	7.82e-07	up	Acer2
Endothelial_cells	ENSMUSG00000024130	0.445916	0.620251	2402	2880	0.08	0.128	0.476082	2.27e-11	6.93e-07	up	Abca3
Endothelial_cells	ENSMUSG00000009418	3.90562	5.4097	2402	2880	0.47	0.577	0.469996	7.38e-16	2.25e-11	up	Nav1
Endothelial_cells	ENSMUSG00000041040	2.15288	2.9798	2402	2880	0.292	0.381	0.468945	1.12e-10	3.41e-06	up	Fam117b
Endothelial_cells	ENSMUSG00000044477	2.56386	3.54614	2402	2880	0.363	0.485	0.467929	2.16e-18	6.59e-14	up	Zfand3
Endothelial_cells	ENSMUSG00000060923	2.01067	2.78088	2402	2880	0.271	0.34	0.467864	1.68e-07	0.00513532	up	Acyp2
Endothelial_cells	ENSMUSG00000022634	0.81354	1.1222	2402	2880	0.14	0.193	0.464046	1.08e-06	0.0327835	up	Yaf2
Endothelial_cells	ENSMUSG00000028525	1.20464	1.66167	2402	2880	0.175	0.248	0.464032	1.67e-10	5.09e-06	up	Pde4b
Endothelial_cells	ENSMUSG00000040043	1.18053	1.62837	2402	2880	0.187	0.271	0.463997	2.54e-14	7.75e-10	up	Rbms2
Endothelial_cells	ENSMUSG00000022469	1.67562	2.31104	2402	2880	0.251	0.373	0.463852	2.09e-25	6.36e-21	up	Rapgef3
Endothelial_cells	ENSMUSG00000033530	1.92972	2.66013	2402	2880	0.289	0.398	0.463106	1.29e-16	3.92e-12	up	Ttc7b
Endothelial_cells	ENSMUSG00000036155	0.70775	0.975338	2402	2880	0.118	0.177	0.462663	3.57e-12	1.09e-07	up	Mgat5
Endothelial_cells	ENSMUSG00000060261	1.44347	1.98594	2402	2880	0.238	0.325	0.46028	1.96e-12	5.97e-08	up	Gtf2i
Endothelial_cells	ENSMUSG00000059890	0.531132	0.730541	2402	2880	0.094	0.139	0.459895	9.12e-09	0.000278041	up	Ube4a
Endothelial_cells	ENSMUSG00000040506	1.40998	1.93829	2402	2880	0.222	0.308	0.459113	1.63e-12	4.95e-08	up	Ambra1
Endothelial_cells	ENSMUSG00000058070	1.38402	1.90231	2402	2880	0.204	0.275	0.458889	4.33e-09	0.000131824	up	Eml1
Endothelial_cells	ENSMUSG00000031583	0.755246	1.03801	2402	2880	0.129	0.191	0.458798	2.79e-11	8.51e-07	up	Wrn
Endothelial_cells	ENSMUSG00000033377	3.73103	5.12601	2402	2880	0.45	0.546	0.458263	1.48e-13	4.52e-09	up	Palmd
Endothelial_cells	ENSMUSG00000022433	0.409721	0.562531	2402	2880	0.075	0.119	0.457292	1.65e-11	5.03e-07	up	Csnk1e
Endothelial_cells	ENSMUSG00000009647	1.10441	1.51284	2402	2880	0.172	0.244	0.453986	6.31e-11	1.92e-06	up	Mcu
Endothelial_cells	ENSMUSG00000068457	1.27591	1.74722	2402	2880	0.194	0.272	0.453535	2.7e-12	8.24e-08	up	Uty
Endothelial_cells	ENSMUSG00000027931	0.59032	0.808366	2402	2880	0.105	0.161	0.45351	1.29e-12	3.92e-08	up	Npr1
Endothelial_cells	ENSMUSG00000021866	0.462476	0.633244	2402	2880	0.087	0.127	0.453383	6.13e-08	0.00186955	up	Anxa11
Endothelial_cells	ENSMUSG00000029439	0.913909	1.25048	2402	2880	0.155	0.22	0.452361	2.86e-10	8.72e-06	up	Sfswap
Endothelial_cells	ENSMUSG00000020181	5.21913	7.13965	2402	2880	0.465	0.534	0.452045	4.41e-10	1.35e-05	up	Nav3
Endothelial_cells	ENSMUSG00000027111	4.70343	6.43332	2402	2880	0.516	0.609	0.451852	9.94e-14	3.03e-09	up	Itga6
Endothelial_cells	ENSMUSG00000101799	2.50401	3.42247	2402	2880	0.321	0.423	0.450798	1.21e-13	3.7e-09	up	9330175M20Rik
Endothelial_cells	ENSMUSG00000047496	0.429238	0.586523	2402	2880	0.065	0.102	0.45041	5.09e-10	1.55e-05	up	Rnf152
Endothelial_cells	ENSMUSG00000039167	13.9859	19.1089	2402	2880	0.822	0.857	0.450274	9.01e-33	2.75e-28	up	Adgrl4
Endothelial_cells	ENSMUSG00000043535	1.17902	1.60983	2402	2880	0.189	0.264	0.449324	1.97e-11	6.01e-07	up	Setx
Endothelial_cells	ENSMUSG00000022122	0.796952	1.08812	2402	2880	0.117	0.165	0.449274	5.62e-07	0.0171315	up	Ednrb
Endothelial_cells	ENSMUSG00000014361	1.15083	1.56999	2402	2880	0.169	0.245	0.448077	1.76e-13	5.37e-09	up	Mertk
Endothelial_cells	ENSMUSG00000035051	0.579082	0.788672	2402	2880	0.1	0.151	0.445657	1.34e-11	4.08e-07	up	Dhx57
Endothelial_cells	ENSMUSG00000021266	0.591115	0.80457	2402	2880	0.103	0.15	0.444778	1.43e-09	4.37e-05	up	Wars
Endothelial_cells	ENSMUSG00000062202	1.74047	2.36777	2402	2880	0.247	0.331	0.444051	1.07e-10	3.27e-06	up	Btbd9
Endothelial_cells	ENSMUSG00000108621	0.516677	0.702247	2402	2880	0.095	0.14	0.442718	2.98e-08	0.000907602	up	Gm37494
Endothelial_cells	ENSMUSG00000000489	2.13183	2.89743	2402	2880	0.296	0.424	0.44268	4.42e-23	1.35e-18	up	Pdgfb
Endothelial_cells	ENSMUSG00000047921	1.14034	1.54903	2402	2880	0.184	0.249	0.441906	9.94e-09	0.000303112	up	Trappc9
Endothelial_cells	ENSMUSG00000043008	0.500793	0.679898	2402	2880	0.08	0.128	0.441103	2.71e-12	8.27e-08	up	Klhl6
Endothelial_cells	ENSMUSG00000098557	0.376861	0.511341	2402	2880	0.068	0.108	0.440253	4.31e-10	1.31e-05	up	Kctd12
Endothelial_cells	ENSMUSG00000005705	0.720209	0.976928	2402	2880	0.121	0.176	0.439836	5.49e-10	1.67e-05	up	Agrp
Endothelial_cells	ENSMUSG00000040723	1.81443	2.46004	2402	2880	0.258	0.351	0.439168	9.14e-13	2.79e-08	up	Rcsd1
Endothelial_cells	ENSMUSG00000041992	5.29181	7.16759	2402	2880	0.536	0.645	0.437726	9.61e-17	2.93e-12	up	Rapgef5
Endothelial_cells	ENSMUSG00000016520	1.22726	1.66035	2402	2880	0.197	0.272	0.436048	5.21e-11	1.59e-06	up	Lnx2
Endothelial_cells	ENSMUSG00000071037	0.860957	1.16424	2402	2880	0.118	0.166	0.435372	1.1e-06	0.0334019	up	Camkmt
Endothelial_cells	ENSMUSG00000035164	0.554698	0.749192	2402	2880	0.095	0.14	0.433635	1.65e-08	0.000504027	up	Zc3h12c
Endothelial_cells	ENSMUSG00000034973	0.786581	1.062	2402	2880	0.134	0.194	0.43312	8.56e-11	2.61e-06	up	Dop1a
Endothelial_cells	ENSMUSG00000058761	1.58509	2.13846	2402	2880	0.242	0.32	0.432005	1.13e-09	3.45e-05	up	Rnf169
Endothelial_cells	ENSMUSG00000018381	0.781554	1.05429	2402	2880	0.134	0.196	0.431857	5.67e-11	1.73e-06	up	Abi3
Endothelial_cells	ENSMUSG00000033306	2.38567	3.21721	2402	2880	0.322	0.432	0.431414	3.96e-16	1.21e-11	up	Lpp
Endothelial_cells	ENSMUSG00000033170	0.578668	0.780315	2402	2880	0.101	0.155	0.431321	3.14e-14	9.57e-10	up	Card10
Endothelial_cells	ENSMUSG00000024074	2.76364	3.72584	2402	2880	0.376	0.479	0.430994	3.1e-13	9.45e-09	up	Crim1
Endothelial_cells	ENSMUSG00000029298	0.552632	0.744267	2402	2880	0.092	0.148	0.429502	8.77e-16	2.67e-11	up	Gbp9
Endothelial_cells	ENSMUSG00000020794	0.977662	1.31666	2402	2880	0.159	0.225	0.429474	7.52e-11	2.29e-06	up	Ube2g1
Endothelial_cells	ENSMUSG00000034354	1.51235	2.03551	2402	2880	0.242	0.334	0.428597	8.68e-14	2.65e-09	up	Mtmr3
Endothelial_cells	ENSMUSG00000018481	0.603486	0.811865	2402	2880	0.109	0.151	0.427919	7.51e-07	0.0228803	up	Appbp2
Endothelial_cells	ENSMUSG00000026181	0.486141	0.653065	2402	2880	0.091	0.133	0.42585	1.1e-08	0.000335209	up	Ppm1f
Endothelial_cells	ENSMUSG00000031785	1.37199	1.84145	2402	2880	0.216	0.306	0.424569	5.66e-15	1.73e-10	up	Adgrg1
Endothelial_cells	ENSMUSG00000085631	1.49977	2.00899	2402	2880	0.191	0.252	0.421723	2.03e-07	0.00618823	up	9630028H03Rik
Endothelial_cells	ENSMUSG00000027312	1.28811	1.72457	2402	2880	0.198	0.285	0.420985	8.21e-16	2.5e-11	up	Atrn
Endothelial_cells	ENSMUSG00000029063	0.365137	0.488682	2402	2880	0.07	0.108	0.420456	2.17e-09	6.61e-05	up	Nadk
Endothelial_cells	ENSMUSG00000024339	0.774889	1.03696	2402	2880	0.137	0.198	0.420297	3.26e-11	9.94e-07	up	Tap2
Endothelial_cells	ENSMUSG00000021892	0.999262	1.33687	2402	2880	0.161	0.223	0.419924	3.49e-09	0.000106464	up	Sh3bp5
Endothelial_cells	ENSMUSG00000022100	0.925112	1.23758	2402	2880	0.157	0.21	0.419826	9.08e-07	0.027677	up	Xpo7
Endothelial_cells	ENSMUSG00000046470	1.39529	1.8661	2402	2880	0.224	0.298	0.419459	4.44e-09	0.000135297	up	Sox18
Endothelial_cells	ENSMUSG00000092368	0.668924	0.893736	2402	2880	0.116	0.172	0.418005	5.52e-12	1.68e-07	up	A930015D03Rik
Endothelial_cells	ENSMUSG00000018604	0.72389	0.965737	2402	2880	0.112	0.158	0.415861	3.2e-07	0.00974742	up	Tbx3
Endothelial_cells	ENSMUSG00000031024	1.5726	2.09782	2402	2880	0.237	0.309	0.415737	2.64e-08	0.000803295	up	Denn2b
Endothelial_cells	ENSMUSG00000036452	1.59502	2.12715	2402	2880	0.236	0.334	0.415348	1.16e-16	3.53e-12	up	ENSMUSG00000036452_Arhgap26
Endothelial_cells	ENSMUSG00000009585	0.851837	1.13535	2402	2880	0.147	0.203	0.414485	1.6e-08	0.000488573	up	Apobec3
Endothelial_cells	ENSMUSG00000032376	0.884525	1.17867	2402	2880	0.143	0.202	0.414183	5.79e-10	1.77e-05	up	Usp3
Endothelial_cells	ENSMUSG00000024219	1.16254	1.54789	2402	2880	0.195	0.265	0.413022	7.76e-10	2.36e-05	up	Anks1
Endothelial_cells	ENSMUSG00000026484	0.401538	0.534401	2402	2880	0.07	0.104	0.412387	8.61e-07	0.0262348	up	Rnf2
Endothelial_cells	ENSMUSG00000022897	1.40685	1.87172	2402	2880	0.222	0.31	0.411895	2.26e-14	6.88e-10	up	Dyrk1a
Endothelial_cells	ENSMUSG00000058440	0.99409	1.32242	2402	2880	0.168	0.234	0.411732	1.2e-10	3.65e-06	up	Nrf1
Endothelial_cells	ENSMUSG00000026469	0.967259	1.28641	2402	2880	0.157	0.214	0.411375	3.91e-08	0.00119176	up	Xpr1
Endothelial_cells	ENSMUSG00000033855	0.702398	0.934109	2402	2880	0.124	0.169	0.411301	6.4e-07	0.0195048	up	Ston1
Endothelial_cells	ENSMUSG00000020015	3.28549	4.36869	2402	2880	0.428	0.545	0.411093	1.36e-16	4.13e-12	up	Cdk17
Endothelial_cells	ENSMUSG00000046985	0.368305	0.489468	2402	2880	0.066	0.103	0.410313	2.41e-10	7.36e-06	up	Tapt1
Endothelial_cells	ENSMUSG00000033444	0.852767	1.1327	2402	2880	0.149	0.203	0.409539	2.03e-07	0.00617931	up	Specc1l
Endothelial_cells	ENSMUSG00000021972	0.750138	0.995918	2402	2880	0.137	0.192	0.408872	1.23e-09	3.74e-05	up	Hmbox1
Endothelial_cells	ENSMUSG00000028776	1.5194	2.01492	2402	2880	0.239	0.333	0.407219	5.19e-16	1.58e-11	up	Tinagl1
Endothelial_cells	ENSMUSG00000037679	0.589528	0.781611	2402	2880	0.102	0.151	0.40689	3.97e-11	1.21e-06	up	Inf2
Endothelial_cells	ENSMUSG00000033016	0.423035	0.560827	2402	2880	0.077	0.119	0.406779	3.82e-11	1.17e-06	up	Nfatc1
Endothelial_cells	ENSMUSG00000022912	0.997926	1.32032	2402	2880	0.164	0.226	0.403885	1.48e-09	4.5e-05	up	Pros1
Endothelial_cells	ENSMUSG00000056167	0.490858	0.649418	2402	2880	0.086	0.125	0.403841	1.95e-08	0.000592906	up	Cnot10
Endothelial_cells	ENSMUSG00000025220	1.38878	1.83569	2402	2880	0.227	0.311	0.402504	7.52e-13	2.29e-08	up	Oga
Endothelial_cells	ENSMUSG00000039270	0.611072	0.80692	2402	2880	0.097	0.148	0.401083	9.74e-13	2.97e-08	up	Megf9
Endothelial_cells	ENSMUSG00000027198	0.549692	0.725806	2402	2880	0.1	0.142	0.400962	3.33e-07	0.0101513	up	Ext2
Endothelial_cells	ENSMUSG00000034613	1.78275	2.35312	2402	2880	0.261	0.343	0.40047	8.39e-11	2.56e-06	up	Ppm1h
Endothelial_cells	ENSMUSG00000038039	0.977238	1.28907	2402	2880	0.154	0.214	0.399553	1.88e-09	5.74e-05	up	Gcc2
Endothelial_cells	ENSMUSG00000022329	1.92731	2.54098	2402	2880	0.284	0.369	0.398795	2.19e-10	6.68e-06	up	Stk3
Endothelial_cells	ENSMUSG00000030403	0.432727	0.569978	2402	2880	0.078	0.122	0.397451	1.13e-11	3.44e-07	up	Vasp
Endothelial_cells	ENSMUSG00000031939	0.656355	0.864401	2402	2880	0.113	0.162	0.397224	2.43e-10	7.41e-06	up	Taf1d
Endothelial_cells	ENSMUSG00000044338	0.975275	1.2841	2402	2880	0.154	0.208	0.396877	2.6e-07	0.00792882	up	Aplnr
Endothelial_cells	ENSMUSG00000052062	5.31187	6.99176	2402	2880	0.51	0.578	0.396437	3.05e-08	0.000929184	up	Pard3b
Endothelial_cells	ENSMUSG00000046546	0.948243	1.24712	2402	2880	0.153	0.22	0.395268	1.43e-12	4.35e-08	up	Fam43a
Endothelial_cells	ENSMUSG00000042772	1.00289	1.31768	2402	2880	0.163	0.232	0.393843	2.38e-12	7.25e-08	up	Smg7
Endothelial_cells	ENSMUSG00000042225	0.423577	0.556532	2402	2880	0.069	0.107	0.393841	2.97e-09	9.05e-05	up	Ammecr1
Endothelial_cells	ENSMUSG00000030795	2.6302	3.45474	2402	2880	0.39	0.5	0.393407	6.5e-15	1.98e-10	up	Fus
Endothelial_cells	ENSMUSG00000021686	1.19298	1.56649	2402	2880	0.196	0.268	0.392965	2.84e-11	8.66e-07	up	Ap3b1
Endothelial_cells	ENSMUSG00000035469	0.35231	0.462433	2402	2880	0.066	0.102	0.392399	6.53e-10	1.99e-05	up	Rcbtb1
Endothelial_cells	ENSMUSG00000017686	0.614518	0.806207	2402	2880	0.107	0.155	0.391694	3.34e-10	1.02e-05	up	Rhot1
Endothelial_cells	ENSMUSG00000033545	1.86619	2.44678	2402	2880	0.284	0.37	0.390793	1.75e-11	5.33e-07	up	Znrf1
Endothelial_cells	ENSMUSG00000030516	4.6733	6.12573	2402	2880	0.55	0.642	0.390442	2.38e-14	7.26e-10	up	Tjp1
Endothelial_cells	ENSMUSG00000021583	0.619605	0.811994	2402	2880	0.112	0.158	0.390121	7.72e-08	0.0023541	up	Erap1
Endothelial_cells	ENSMUSG00000029207	9.32898	12.2224	2402	2880	0.743	0.789	0.389738	7.24e-19	2.21e-14	up	Apbb2
Endothelial_cells	ENSMUSG00000026842	0.619547	0.811634	2402	2880	0.112	0.155	0.389616	2.14e-07	0.00651857	up	Abl1
Endothelial_cells	ENSMUSG00000046743	1.14708	1.50217	2402	2880	0.181	0.248	0.389083	2.67e-10	8.15e-06	up	Fat4
Endothelial_cells	ENSMUSG00000024789	0.874755	1.14537	2402	2880	0.145	0.204	0.388864	2.07e-10	6.31e-06	up	Jak2
Endothelial_cells	ENSMUSG00000037270	1.60075	2.0948	2402	2880	0.254	0.336	0.38806	3.26e-11	9.94e-07	up	4932438A13Rik
Endothelial_cells	ENSMUSG00000069729	2.04507	2.67531	2402	2880	0.314	0.398	0.387552	7e-10	2.13e-05	up	Arid1b
Endothelial_cells	ENSMUSG00000061244	1.06874	1.39681	2402	2880	0.178	0.242	0.386231	6.65e-10	2.03e-05	up	Exoc5
Endothelial_cells	ENSMUSG00000064373	2.33575	3.05156	2402	2880	0.342	0.449	0.38566	2.9e-15	8.83e-11	up	Selenop
Endothelial_cells	ENSMUSG00000039000	1.13536	1.4829	2402	2880	0.183	0.25	0.385271	5.1e-10	1.55e-05	up	Ube3c
Endothelial_cells	ENSMUSG00000035954	6.66639	8.70621	2402	2880	0.606	0.684	0.385139	2.78e-12	8.47e-08	up	Dock4
Endothelial_cells	ENSMUSG00000054814	0.776987	1.0145	2402	2880	0.133	0.183	0.384804	7.39e-08	0.00225243	up	Usp46
Endothelial_cells	ENSMUSG00000028854	0.402188	0.524672	2402	2880	0.072	0.107	0.383544	3.67e-08	0.00111878	up	Slc9a1
Endothelial_cells	ENSMUSG00000032462	1.09832	1.43191	2402	2880	0.18	0.251	0.382637	4.96e-13	1.51e-08	up	Pik3cb
Endothelial_cells	ENSMUSG00000052139	1.53781	2.00466	2402	2880	0.221	0.289	0.382483	2.93e-08	0.000892919	up	Babam2
Endothelial_cells	ENSMUSG00000019917	0.481432	0.627511	2402	2880	0.08	0.119	0.382308	8.73e-08	0.00265991	up	Septin10
Endothelial_cells	ENSMUSG00000029802	2.34903	3.06002	2402	2880	0.328	0.406	0.381478	4.55e-08	0.00138725	up	Abcg2
Endothelial_cells	ENSMUSG00000037514	0.745451	0.971061	2402	2880	0.129	0.184	0.381449	9.59e-11	2.92e-06	up	Pank2
Endothelial_cells	ENSMUSG00000020594	1.82494	2.377	2402	2880	0.288	0.377	0.381292	1.61e-11	4.89e-07	up	Pum2
Endothelial_cells	ENSMUSG00000035236	0.793209	1.03285	2402	2880	0.124	0.175	0.380864	1.87e-08	0.000570846	up	Scai
Endothelial_cells	ENSMUSG00000097415	1.25427	1.63316	2402	2880	0.191	0.262	0.380821	3.77e-11	1.15e-06	up	AU020206
Endothelial_cells	ENSMUSG00000001052	0.974412	1.2683	2402	2880	0.172	0.238	0.380291	3.17e-11	9.67e-07	up	Sec24b
Endothelial_cells	ENSMUSG00000020101	0.599605	0.780092	2402	2880	0.103	0.15	0.379631	1.04e-10	3.18e-06	up	Vsir
Endothelial_cells	ENSMUSG00000024812	1.26073	1.63997	2402	2880	0.203	0.278	0.379405	2.4e-12	7.32e-08	up	Tjp2
Endothelial_cells	ENSMUSG00000052298	1.19027	1.54756	2402	2880	0.193	0.269	0.378712	2.25e-13	6.85e-09	up	Cdc42se2
Endothelial_cells	ENSMUSG00000044562	1.7972	2.33633	2402	2880	0.279	0.381	0.378491	3.9e-17	1.19e-12	up	Rasip1
Endothelial_cells	ENSMUSG00000035969	0.586783	0.762626	2402	2880	0.105	0.149	0.378148	4.91e-08	0.00149563	up	Rusc2
Endothelial_cells	ENSMUSG00000026361	0.988218	1.28278	2402	2880	0.165	0.232	0.376373	8.35e-12	2.55e-07	up	Cdc73
Endothelial_cells	ENSMUSG00000014547	0.556186	0.721953	2402	2880	0.099	0.14	0.376337	8.93e-09	0.000272242	up	Wdfy2
Endothelial_cells	ENSMUSG00000031930	0.48042	0.623254	2402	2880	0.084	0.118	0.375524	6.09e-07	0.0185603	up	Wwp2
Endothelial_cells	ENSMUSG00000021036	1.65063	2.14083	2402	2880	0.256	0.338	0.375157	7.28e-11	2.22e-06	up	Sptlc2
Endothelial_cells	ENSMUSG00000060657	0.802732	1.04035	2402	2880	0.137	0.197	0.374073	3.77e-12	1.15e-07	up	Marf1
Endothelial_cells	ENSMUSG00000041702	2.11985	2.74723	2402	2880	0.305	0.398	0.374017	1.16e-12	3.52e-08	up	Btbd7
Endothelial_cells	ENSMUSG00000052539	2.41064	3.12283	2402	2880	0.313	0.391	0.373441	3.12e-08	0.000950225	up	Magi3
Endothelial_cells	ENSMUSG00000028878	0.4892	0.633385	2402	2880	0.087	0.127	0.372658	4.05e-09	0.000123557	up	Fam76a
Endothelial_cells	ENSMUSG00000040732	2.2243	2.87849	2402	2880	0.319	0.418	0.371956	1.84e-14	5.62e-10	up	Erg
Endothelial_cells	ENSMUSG00000053714	0.729305	0.943432	2402	2880	0.117	0.166	0.371396	1.5e-08	0.000457594	up	4732471J01Rik
Endothelial_cells	ENSMUSG00000029110	0.410121	0.530292	2402	2880	0.076	0.109	0.370736	5.12e-07	0.0156139	up	Rnf4
Endothelial_cells	ENSMUSG00000042121	0.561912	0.726226	2402	2880	0.1	0.146	0.370074	6.08e-11	1.85e-06	up	Ssh1
Endothelial_cells	ENSMUSG00000026509	1.3501	1.74328	2402	2880	0.215	0.297	0.368732	4.18e-14	1.27e-09	up	Capn2
Endothelial_cells	ENSMUSG00000020680	1.20846	1.55745	2402	2880	0.195	0.273	0.366014	7.68e-15	2.34e-10	up	Taf15
Endothelial_cells	ENSMUSG00000060373	1.17012	1.50729	2402	2880	0.202	0.274	0.365299	4.4e-12	1.34e-07	up	Hnrnpc
Endothelial_cells	ENSMUSG00000046876	5.86395	7.54503	2402	2880	0.589	0.671	0.363655	4.22e-11	1.29e-06	up	Atxn1
Endothelial_cells	ENSMUSG00000026082	0.59143	0.760501	2402	2880	0.101	0.143	0.362743	1.27e-08	0.000388389	up	Rev1
Endothelial_cells	ENSMUSG00000031375	1.35926	1.05565	2402	2880	0.172	0.164	-0.364698	2.38e-07	0.00724786	down	Bgn
Endothelial_cells	ENSMUSG00000026335	3.96401	3.07324	2402	2880	0.475	0.402	-0.367199	1.87e-11	5.69e-07	down	Pam
Endothelial_cells	ENSMUSG00000004980	6.50316	5.0343	2402	2880	0.694	0.624	-0.369349	1.18e-23	3.6e-19	down	Hnrnpa2b1
Endothelial_cells	ENSMUSG00000032679	0.955323	0.739478	2402	2880	0.158	0.143	-0.369481	8.03e-08	0.00244701	down	Cd59a
Endothelial_cells	ENSMUSG00000055681	0.685761	0.528631	2402	2880	0.123	0.109	-0.375445	1.41e-06	0.0430319	down	Cope
Endothelial_cells	ENSMUSG00000074272	1.19247	0.916249	2402	2880	0.191	0.176	-0.380144	5.07e-11	1.55e-06	down	Ceacam1
Endothelial_cells	ENSMUSG00000058407	0.664204	0.509049	2402	2880	0.115	0.109	-0.383822	2.76e-10	8.42e-06	down	Txndc9
Endothelial_cells	ENSMUSG00000030189	1.05718	0.806599	2402	2880	0.184	0.161	-0.390304	2.96e-09	9.01e-05	down	Ybx3
Endothelial_cells	ENSMUSG00000071072	1.81709	1.38527	2402	2880	0.286	0.252	-0.391468	4.61e-14	1.4e-09	down	Ptges3
Endothelial_cells	ENSMUSG00000025283	1.01585	0.774005	2402	2880	0.165	0.152	-0.392276	2.1e-09	6.4e-05	down	Sat1
Endothelial_cells	ENSMUSG00000020456	2.92787	2.22294	2402	2880	0.398	0.346	-0.397385	5.12e-16	1.56e-11	down	Ogdh
Endothelial_cells	ENSMUSG00000071659	0.808773	0.613968	2402	2880	0.139	0.128	-0.397572	4.42e-10	1.35e-05	down	Hnrnpul2
Endothelial_cells	ENSMUSG00000025724	0.829826	0.628457	2402	2880	0.149	0.13	-0.400994	1.51e-07	0.00460935	down	Sec11a
Endothelial_cells	ENSMUSG00000025241	1.3646	1.03173	2402	2880	0.225	0.184	-0.40342	1.67e-07	0.00508149	down	Fyco1
Endothelial_cells	ENSMUSG00000004789	1.03036	0.778536	2402	2880	0.173	0.147	-0.404311	2.25e-07	0.00686675	down	Dlst
Endothelial_cells	ENSMUSG00000004460	0.749519	0.566074	2402	2880	0.135	0.116	-0.404976	1.39e-06	0.0425143	down	Dnajb11
Endothelial_cells	ENSMUSG00000000168	1.20599	0.908977	2402	2880	0.196	0.164	-0.407903	1.02e-07	0.00310984	down	Dlat
Endothelial_cells	ENSMUSG00000007739	1.02612	0.773234	2402	2880	0.177	0.159	-0.408216	5.42e-11	1.65e-06	down	Cct4
Endothelial_cells	ENSMUSG00000025499	0.608847	0.457378	2402	2880	0.111	0.097	-0.412692	9.56e-07	0.0291246	down	Hras
Endothelial_cells	ENSMUSG00000027170	0.848046	0.63671	2402	2880	0.143	0.132	-0.413506	5.98e-12	1.82e-07	down	Eif3m
Endothelial_cells	ENSMUSG00000058558	4.02001	3.01541	2402	2880	0.498	0.427	-0.414842	3.56e-17	1.08e-12	down	Rpl5
Endothelial_cells	ENSMUSG00000021290	3.55412	2.66433	2402	2880	0.47	0.38	-0.415717	2.37e-17	7.22e-13	down	Atp5mpl
Endothelial_cells	ENSMUSG00000006998	0.691947	0.517693	2402	2880	0.122	0.108	-0.418563	2.37e-08	0.000721215	down	Psmd2
Endothelial_cells	ENSMUSG00000038387	0.79301	0.592977	2402	2880	0.145	0.125	-0.419363	1.47e-08	0.000448653	down	Rras
Endothelial_cells	ENSMUSG00000063856	0.997764	0.744386	2402	2880	0.167	0.143	-0.422648	1.63e-08	0.000496062	down	Gpx1
Endothelial_cells	ENSMUSG00000020088	0.852809	0.6335	2402	2880	0.152	0.132	-0.428877	2.6e-09	7.94e-05	down	Sar1a
Endothelial_cells	ENSMUSG00000090000	0.663288	0.492381	2402	2880	0.113	0.1	-0.429859	3.8e-07	0.0115714	down	Ier3ip1
Endothelial_cells	ENSMUSG00000019897	0.634383	0.470618	2402	2880	0.107	0.098	-0.430797	7.22e-09	0.000220164	down	Ccdc59
Endothelial_cells	ENSMUSG00000071644	1.2876	0.953488	2402	2880	0.209	0.178	-0.433394	5.04e-09	0.000153634	down	Eef1g
Endothelial_cells	ENSMUSG00000028165	0.905692	0.66645	2402	2880	0.153	0.131	-0.442524	5.26e-07	0.0160255	down	Cisd2
Endothelial_cells	ENSMUSG00000038244	0.793796	0.578732	2402	2880	0.134	0.115	-0.455872	3.49e-07	0.01063	down	Mical2
Endothelial_cells	ENSMUSG00000010406	0.762892	0.555307	2402	2880	0.126	0.11	-0.458194	5.75e-09	0.00017531	down	Mrpl52
Endothelial_cells	ENSMUSG00000038708	1.87368	1.36167	2402	2880	0.274	0.23	-0.460503	5.59e-12	1.7e-07	down	Golga4
Endothelial_cells	ENSMUSG00000053565	0.920176	0.668034	2402	2880	0.159	0.131	-0.461987	1.1e-07	0.00336188	down	Eif3k
Endothelial_cells	ENSMUSG00000049792	0.684278	0.491708	2402	2880	0.122	0.107	-0.476781	8.16e-11	2.49e-06	down	Bag5
Endothelial_cells	ENSMUSG00000090266	0.710308	0.509574	2402	2880	0.124	0.104	-0.479153	1.16e-08	0.000354795	down	Mettl23
Endothelial_cells	ENSMUSG00000039615	0.798051	0.572467	2402	2880	0.137	0.11	-0.479287	8.65e-07	0.0263552	down	Stub1
Endothelial_cells	ENSMUSG00000027293	1.62128	1.15762	2402	2880	0.244	0.193	-0.485966	1e-09	3.06e-05	down	Ehd4
Endothelial_cells	ENSMUSG00000020708	0.633173	0.451861	2402	2880	0.111	0.091	-0.486721	6.41e-07	0.0195472	down	Psmc5
Endothelial_cells	ENSMUSG00000060904	0.848626	0.603168	2402	2880	0.146	0.115	-0.492569	8.96e-07	0.0273	down	Arl1
Endothelial_cells	ENSMUSG00000032288	0.703906	0.499776	2402	2880	0.127	0.106	-0.494102	1.45e-09	4.42e-05	down	Imp3
Endothelial_cells	ENSMUSG00000032112	0.569442	0.402204	2402	2880	0.105	0.089	-0.501622	2.48e-08	0.000756484	down	Trappc4
Endothelial_cells	ENSMUSG00000026755	0.79332	0.558918	2402	2880	0.137	0.107	-0.505267	8.62e-07	0.0262688	down	Arpc5l
Endothelial_cells	ENSMUSG00000027668	1.09713	0.771912	2402	2880	0.184	0.151	-0.507226	1.17e-11	3.55e-07	down	Mfn1
Endothelial_cells	ENSMUSG00000013622	0.949068	0.664686	2402	2880	0.167	0.136	-0.513839	5.4e-11	1.65e-06	down	Atraid
Endothelial_cells	ENSMUSG00000032320	0.845165	0.591777	2402	2880	0.145	0.116	-0.514179	5.92e-08	0.00180441	down	Rcn2
Endothelial_cells	ENSMUSG00000026072	1.35202	0.945263	2402	2880	0.201	0.158	-0.516324	9.66e-10	2.94e-05	down	Il1r1
Endothelial_cells	ENSMUSG00000032026	0.746603	0.520161	2402	2880	0.131	0.103	-0.521384	6.35e-08	0.00193568	down	Rexo2
Endothelial_cells	ENSMUSG00000037852	0.845475	0.58902	2402	2880	0.129	0.103	-0.521447	1.11e-06	0.03378	down	Cpe
Endothelial_cells	ENSMUSG00000020311	0.789268	0.545225	2402	2880	0.135	0.116	-0.533663	2.49e-11	7.6e-07	down	Erlec1
Endothelial_cells	ENSMUSG00000034659	0.763094	0.526836	2402	2880	0.137	0.114	-0.534506	3.86e-11	1.18e-06	down	Tmem109
Endothelial_cells	ENSMUSG00000021072	0.695592	0.477276	2402	2880	0.121	0.099	-0.543419	2.91e-08	0.000887391	down	Tmx1
Endothelial_cells	ENSMUSG00000064080	2.29171	1.57212	2402	2880	0.264	0.201	-0.543709	9.55e-11	2.91e-06	down	Fbln2
Endothelial_cells	ENSMUSG00000090258	0.639027	0.437646	2402	2880	0.107	0.086	-0.546113	5.31e-08	0.00161851	down	Churc1
Endothelial_cells	ENSMUSG00000068391	0.62305	0.424534	2402	2880	0.103	0.084	-0.553468	2.21e-07	0.0067301	down	Chrac1
Endothelial_cells	ENSMUSG00000033059	1.05022	0.714197	2402	2880	0.174	0.131	-0.556297	5.21e-09	0.000158922	down	Pygb
Endothelial_cells	ENSMUSG00000028062	0.84261	0.572259	2402	2880	0.141	0.118	-0.558198	3.14e-11	9.57e-07	down	Lamtor2
Endothelial_cells	ENSMUSG00000030751	0.919501	0.616659	2402	2880	0.157	0.123	-0.576377	2.14e-08	0.000651075	down	Psma1
Endothelial_cells	ENSMUSG00000052684	2.48296	1.66263	2402	2880	0.318	0.272	-0.578591	5.37e-22	1.64e-17	down	Jun
Endothelial_cells	ENSMUSG00000034842	1.4656	0.977694	2402	2880	0.215	0.168	-0.584035	3e-14	9.14e-10	down	Art3
Endothelial_cells	ENSMUSG00000024120	0.761803	0.506601	2402	2880	0.132	0.098	-0.588568	3.03e-08	0.000923863	down	Lrpprc
Endothelial_cells	ENSMUSG00000022528	0.844868	0.560484	2402	2880	0.132	0.104	-0.592052	9.68e-09	0.000295089	down	Hes1
Endothelial_cells	ENSMUSG00000038170	2.45558	1.62205	2402	2880	0.331	0.255	-0.598247	1.2e-17	3.67e-13	down	Pde4dip
Endothelial_cells	ENSMUSG00000043866	0.58677	0.384405	2402	2880	0.108	0.085	-0.610168	9.02e-09	0.000275041	down	Taf10
Endothelial_cells	ENSMUSG00000022505	1.38413	0.898577	2402	2880	0.216	0.16	-0.623266	1.56e-13	4.75e-09	down	Emp2
Endothelial_cells	ENSMUSG00000036427	1.34173	0.866582	2402	2880	0.218	0.176	-0.63068	8.64e-20	2.63e-15	down	Gpi1
Endothelial_cells	ENSMUSG00000046314	2.2755	1.46537	2402	2880	0.269	0.186	-0.634918	1.39e-13	4.24e-09	down	Stxbp6
Endothelial_cells	ENSMUSG00000044221	0.601326	0.387154	2402	2880	0.11	0.078	-0.635239	2.15e-07	0.00656528	down	Grsf1
Endothelial_cells	ENSMUSG00000026365	2.15199	1.38326	2402	2880	0.219	0.184	-0.637602	7.25e-12	2.21e-07	down	Cfh
Endothelial_cells	ENSMUSG00000038121	0.762704	0.482261	2402	2880	0.127	0.094	-0.661309	2.86e-09	8.73e-05	down	Fam210a
Endothelial_cells	ENSMUSG00000026078	0.569335	0.354588	2402	2880	0.103	0.078	-0.683134	8.26e-12	2.52e-07	down	Pdcl3
Endothelial_cells	ENSMUSG00000060002	1.84733	1.14822	2402	2880	0.274	0.192	-0.686036	5.65e-17	1.72e-12	down	Chpt1
Endothelial_cells	ENSMUSG00000028497	0.610558	0.378331	2402	2880	0.106	0.078	-0.690479	4.1e-09	0.000125106	down	Hacd4
Endothelial_cells	ENSMUSG00000052698	1.39828	0.859662	2402	2880	0.216	0.156	-0.701814	9.69e-16	2.95e-11	down	Tln2
Endothelial_cells	ENSMUSG00000030255	0.611094	0.372132	2402	2880	0.105	0.066	-0.715579	1.51e-07	0.004616	down	Sspn
Endothelial_cells	ENSMUSG00000039607	1.02094	0.620337	2402	2880	0.117	0.087	-0.718777	4.57e-07	0.0139183	down	Rbms3
Endothelial_cells	ENSMUSG00000043631	1.28596	0.775927	2402	2880	0.203	0.144	-0.728852	1.6e-14	4.87e-10	down	Ecm2
Endothelial_cells	ENSMUSG00000075054	0.583819	0.350958	2402	2880	0.102	0.074	-0.734224	1.88e-09	5.72e-05	down	Yae1d1
Endothelial_cells	ENSMUSG00000030747	0.586392	0.349194	2402	2880	0.102	0.065	-0.747836	5.77e-07	0.0175871	down	Dgat2
Endothelial_cells	ENSMUSG00000023224	1.01782	0.60205	2402	2880	0.124	0.092	-0.757533	2.9e-08	0.000884413	down	Serping1
Endothelial_cells	ENSMUSG00000040249	0.711949	0.418757	2402	2880	0.104	0.076	-0.76566	6.75e-08	0.00205737	down	Lrp1
Endothelial_cells	ENSMUSG00000078670	0.633308	0.370611	2402	2880	0.108	0.074	-0.773	5.06e-09	0.000154165	down	Fam174b
Endothelial_cells	ENSMUSG00000024966	0.672445	0.389839	2402	2880	0.118	0.078	-0.786537	3.12e-10	9.5e-06	down	Stip1
Endothelial_cells	ENSMUSG00000021798	1.42455	0.821932	2402	2880	0.219	0.142	-0.793419	4.01e-17	1.22e-12	down	Ldb3
Endothelial_cells	ENSMUSG00000024924	0.726576	0.417113	2402	2880	0.117	0.073	-0.800675	2.84e-09	8.66e-05	down	Vldlr
Endothelial_cells	ENSMUSG00000041828	1.27942	0.733779	2402	2880	0.128	0.091	-0.802068	2.48e-08	0.000756081	down	Abca8a
Endothelial_cells	ENSMUSG00000031791	0.599395	0.3431	2402	2880	0.103	0.064	-0.804877	3.35e-08	0.00102128	down	Tmem38a
Endothelial_cells	ENSMUSG00000039601	0.919726	0.525219	2402	2880	0.145	0.091	-0.808286	3.07e-11	9.36e-07	down	Rcan2
Endothelial_cells	ENSMUSG00000054640	1.66104	0.946363	2402	2880	0.209	0.143	-0.811618	2.17e-14	6.62e-10	down	Slc8a1
Endothelial_cells	ENSMUSG00000028798	0.551054	0.312761	2402	2880	0.103	0.071	-0.817132	1.14e-11	3.49e-07	down	Eif3i
Endothelial_cells	ENSMUSG00000041741	0.783468	0.437133	2402	2880	0.109	0.07	-0.841802	2.76e-08	0.000841347	down	Pde3a
Endothelial_cells	ENSMUSG00000027452	0.803062	0.443727	2402	2880	0.127	0.082	-0.855841	1.88e-10	5.73e-06	down	Acss1
Endothelial_cells	ENSMUSG00000003617	1.06817	0.584167	2402	2880	0.149	0.099	-0.870687	7.38e-11	2.25e-06	down	Cp
Endothelial_cells	ENSMUSG00000026043	1.45674	0.793121	2402	2880	0.142	0.119	-0.877127	1.1e-12	3.36e-08	down	Col3a1
Endothelial_cells	ENSMUSG00000028207	1.50829	0.817371	2402	2880	0.234	0.153	-0.883848	2.69e-24	8.21e-20	down	Asph
Endothelial_cells	ENSMUSG00000052516	1.7934	0.970162	2402	2880	0.177	0.1	-0.886403	1.1e-16	3.34e-12	down	Robo2
Endothelial_cells	ENSMUSG00000040666	0.847351	0.450075	2402	2880	0.132	0.077	-0.912795	2.73e-12	8.33e-08	down	Sh3bgr
Endothelial_cells	ENSMUSG00000036278	0.634527	0.332471	2402	2880	0.107	0.062	-0.932451	1.09e-10	3.32e-06	down	Macrod1
Endothelial_cells	ENSMUSG00000040118	0.925863	0.484396	2402	2880	0.145	0.084	-0.934611	4.74e-13	1.44e-08	down	Cacna2d1
Endothelial_cells	ENSMUSG00000024304	0.932968	0.470383	2402	2880	0.141	0.086	-0.98799	1.33e-13	4.07e-09	down	Cdh2
Endothelial_cells	ENSMUSG00000059327	1.42525	0.708684	2402	2880	0.148	0.082	-1.008	5.95e-15	1.81e-10	down	Eda
Endothelial_cells	ENSMUSG00000038663	0.659684	0.324194	2402	2880	0.113	0.058	-1.02492	9.88e-13	3.01e-08	down	Fsd2
Endothelial_cells	ENSMUSG00000002107	1.93613	0.938949	2402	2880	0.142	0.107	-1.04406	3.24e-15	9.88e-11	down	Celf2
Endothelial_cells	ENSMUSG00000048332	0.89875	0.420932	2402	2880	0.105	0.062	-1.09433	1.4e-10	4.28e-06	down	Lhfp
Endothelial_cells	ENSMUSG00000026576	0.780219	0.359844	2402	2880	0.126	0.064	-1.11651	2.03e-15	6.17e-11	down	Atp1b1
Endothelial_cells	ENSMUSG00000025757	0.573674	0.261122	2402	2880	0.101	0.049	-1.13551	5.07e-13	1.55e-08	down	Hspa4l
Endothelial_cells	ENSMUSG00000019899	1.75093	0.760838	2402	2880	0.149	0.093	-1.20246	2.42e-18	7.38e-14	down	Lama2
Endothelial_cells	ENSMUSG00000020427	0.705916	0.301567	2402	2880	0.11	0.052	-1.22702	2.73e-15	8.31e-11	down	Igfbp3
Endothelial_cells	ENSMUSG00000020288	0.823228	0.348523	2402	2880	0.141	0.074	-1.24004	3.54e-22	1.08e-17	down	Ahsa2
Endothelial_cells	ENSMUSG00000020354	1.1962	0.4726	2402	2880	0.117	0.068	-1.33977	3.7e-14	1.13e-09	down	Sgcd
Endothelial_cells	ENSMUSG00000058571	1.75351	0.689457	2402	2880	0.113	0.064	-1.34671	2.03e-13	6.17e-09	down	Gpc6
Endothelial_cells	ENSMUSG00000063415	1.55552	0.198742	2402	2880	0.176	0.036	-2.96843	2.13e-75	6.5e-71	down	Cyp26b1
Epicardial_cells	ENSMUSG00000047638	0.134358	0.502992	481	309	0.027	0.12	1.90445	6.47e-07	0.0197183	up	Nr1h4
Epicardial_cells	ENSMUSG00000020806	0.168643	0.554445	481	309	0.031	0.129	1.71707	3.68e-07	0.0112236	up	Rhbdf2
Epicardial_cells	ENSMUSG00000108489	0.492645	1.23667	481	309	0.1	0.243	1.32785	6.16e-07	0.0187885	up	Gm45025
Epicardial_cells	ENSMUSG00000020589	0.768351	1.83601	481	309	0.156	0.33	1.25673	7.56e-08	0.00230479	up	Fam49a
Epicardial_cells	ENSMUSG00000037236	0.833196	1.68621	481	309	0.181	0.346	1.01706	1.05e-06	0.0320327	up	Matr3
Epicardial_cells	ENSMUSG00000044017	2.53022	4.88488	481	309	0.366	0.586	0.949058	1.03e-09	3.14e-05	up	Adgrd1
Epicardial_cells	ENSMUSG00000058420	0.436038	0.835079	481	309	0.081	0.194	0.93746	9.34e-07	0.0284632	up	Syt17
Epicardial_cells	ENSMUSG00000053897	2.86104	5.46244	481	309	0.387	0.498	0.933005	1.15e-06	0.0349577	up	Slc39a8
Epicardial_cells	ENSMUSG00000059456	1.72943	3.20135	481	309	0.299	0.518	0.88838	6.35e-09	0.000193651	up	Ptk2b
Epicardial_cells	ENSMUSG00000101797	2.97646	5.43401	481	309	0.374	0.57	0.868421	2.12e-07	0.00647248	up	Gm29266
Epicardial_cells	ENSMUSG00000021703	0.527024	0.945196	481	309	0.116	0.243	0.842744	1.22e-06	0.0373076	up	Serinc5
Epicardial_cells	ENSMUSG00000051550	0.466158	0.827349	481	309	0.087	0.227	0.827678	1.13e-09	3.45e-05	up	Zfp579
Epicardial_cells	ENSMUSG00000029381	4.06427	7.15015	481	309	0.486	0.66	0.814979	7.72e-08	0.00235213	up	Shroom3
Epicardial_cells	ENSMUSG00000026618	0.640667	1.10413	481	309	0.125	0.256	0.785269	6.01e-07	0.0183267	up	Iars2
Epicardial_cells	ENSMUSG00000044813	0.862237	1.43317	481	309	0.156	0.301	0.733049	1.54e-06	0.0468852	up	Shb
Epicardial_cells	ENSMUSG00000040254	6.04708	9.81585	481	309	0.626	0.754	0.698874	7.55e-08	0.00230027	up	Sema3d
Epicardial_cells	ENSMUSG00000029761	5.21711	8.4381	481	309	0.617	0.757	0.693668	2.1e-08	0.000640671	up	Cald1
Epicardial_cells	ENSMUSG00000034903	3.72561	5.85544	481	309	0.489	0.673	0.652302	1.55e-06	0.0472404	up	Cobll1
Epicardial_cells	ENSMUSG00000038725	15.354	24.0617	481	309	0.879	0.89	0.648126	1.24e-13	3.79e-09	up	Pkhd1l1
Epicardial_cells	ENSMUSG00000048402	0.965668	1.44245	481	309	0.179	0.324	0.578923	2.47e-07	0.00753613	up	Gli2
Epicardial_cells	ENSMUSG00000024998	8.18823	12.1132	481	309	0.682	0.786	0.564956	1.14e-06	0.0346596	up	Plce1
Epicardial_cells	ENSMUSG00000020467	10.7085	15.7856	481	309	0.786	0.906	0.559853	8.29e-10	2.53e-05	up	Efemp1
Epicardial_cells	ENSMUSG00000031613	5.55145	8.05775	481	309	0.499	0.686	0.537511	1.15e-06	0.0351794	up	Hpgd
Epicardial_cells	ENSMUSG00000063450	11.8463	16.593	481	309	0.842	0.903	0.486133	4.16e-08	0.00126809	up	Syne2
Epicardial_cells	ENSMUSG00000003226	1.32694	0.912689	481	309	0.262	0.252	-0.539909	1.32e-06	0.0402438	down	Ranbp2
Epicardial_cells	ENSMUSG00000035863	1.33116	0.87455	481	309	0.252	0.227	-0.606073	1.09e-06	0.0331302	down	Palm
Fibroblasts	ENSMUSG00000093765	0.201689	0.706447	3428	2988	0.034	0.133	1.80845	2.61e-50	7.97e-46	up	Gm20658
Fibroblasts	ENSMUSG00000011171	0.260398	0.784765	3428	2988	0.052	0.173	1.59154	7.34e-58	2.24e-53	up	Vipr2
Fibroblasts	ENSMUSG00000031613	0.194495	0.555947	3428	2988	0.033	0.101	1.51521	9.77e-29	2.98e-24	up	Hpgd
Fibroblasts	ENSMUSG00000028957	0.382558	0.755528	3428	2988	0.076	0.151	0.981805	4.15e-21	1.27e-16	up	Per3
Fibroblasts	ENSMUSG00000032609	0.230917	0.437569	3428	2988	0.045	0.102	0.922134	6.11e-24	1.86e-19	up	Klhdc8b
Fibroblasts	ENSMUSG00000003949	0.452096	0.813175	3428	2988	0.083	0.16	0.846936	2.65e-23	8.07e-19	up	Hlf
Fibroblasts	ENSMUSG00000030074	1.17304	2.10565	3428	2988	0.2	0.361	0.844009	2.8e-47	8.53e-43	up	Gxylt2
Fibroblasts	ENSMUSG00000021047	0.796668	1.42837	3428	2988	0.138	0.263	0.842319	5.97e-39	1.82e-34	up	Nova1
Fibroblasts	ENSMUSG00000042628	0.253615	0.450833	3428	2988	0.051	0.108	0.829953	1.84e-22	5.62e-18	up	Zfyve1
Fibroblasts	ENSMUSG00000005360	0.449838	0.789716	3428	2988	0.077	0.159	0.811926	1.71e-30	5.22e-26	up	Slc1a3
Fibroblasts	ENSMUSG00000058470	0.561492	0.97155	3428	2988	0.096	0.184	0.791024	3.15e-27	9.59e-23	up	Gm8369
Fibroblasts	ENSMUSG00000008658	0.875837	1.51268	3428	2988	0.127	0.211	0.788371	2.42e-18	7.37e-14	up	Rbfox1
Fibroblasts	ENSMUSG00000049690	0.746301	1.27498	3428	2988	0.119	0.221	0.772641	4.61e-30	1.41e-25	up	Nckap5
Fibroblasts	ENSMUSG00000022114	0.504548	0.860909	3428	2988	0.1	0.186	0.770868	1.02e-25	3.12e-21	up	Spry2
Fibroblasts	ENSMUSG00000025978	0.282578	0.481464	3428	2988	0.057	0.113	0.76878	1.17e-20	3.56e-16	up	Rftn2
Fibroblasts	ENSMUSG00000027253	0.461838	0.77971	3428	2988	0.088	0.155	0.755551	4.4e-18	1.34e-13	up	Lrp4
Fibroblasts	ENSMUSG00000044749	3.89573	6.56325	3428	2988	0.467	0.647	0.752514	8.52e-54	2.6e-49	up	Abca6
Fibroblasts	ENSMUSG00000002265	0.726248	1.22285	3428	2988	0.129	0.232	0.751715	5.48e-29	1.67e-24	up	Peg3
Fibroblasts	ENSMUSG00000034867	0.304185	0.507851	3428	2988	0.062	0.119	0.739456	4.91e-21	1.5e-16	up	Ankrd27
Fibroblasts	ENSMUSG00000026586	1.19702	1.99568	3428	2988	0.207	0.344	0.73744	4.84e-35	1.48e-30	up	Prrx1
Fibroblasts	ENSMUSG00000040852	1.4988	2.44424	3428	2988	0.244	0.406	0.70558	5.63e-45	1.71e-40	up	Plekhh2
Fibroblasts	ENSMUSG00000066894	0.268579	0.437735	3428	2988	0.05	0.104	0.704709	2.97e-26	9.05e-22	up	Vsig10
Fibroblasts	ENSMUSG00000056073	0.945426	1.53237	3428	2988	0.134	0.233	0.696729	1.93e-26	5.9e-22	up	Grik2
Fibroblasts	ENSMUSG00000007783	0.300344	0.486008	3428	2988	0.06	0.119	0.694367	6.93e-25	2.11e-20	up	Cpt1c
Fibroblasts	ENSMUSG00000006586	1.41816	2.28369	3428	2988	0.228	0.38	0.687347	3.78e-41	1.15e-36	up	Runx1t1
Fibroblasts	ENSMUSG00000061132	0.524382	0.844098	3428	2988	0.091	0.157	0.686793	4.55e-18	1.39e-13	up	Blnk
Fibroblasts	ENSMUSG00000062563	0.369371	0.594141	3428	2988	0.074	0.142	0.685735	7.51e-27	2.29e-22	up	Cys1
Fibroblasts	ENSMUSG00000035279	0.434191	0.697333	3428	2988	0.093	0.15	0.683518	1.84e-12	5.62e-08	up	Ssc5d
Fibroblasts	ENSMUSG00000021835	0.57089	0.912109	3428	2988	0.103	0.186	0.675993	4e-26	1.22e-21	up	Bmp4
Fibroblasts	ENSMUSG00000037405	0.296253	0.47223	3428	2988	0.059	0.107	0.672661	8.93e-15	2.72e-10	up	Icam1
Fibroblasts	ENSMUSG00000031154	0.277278	0.44162	3428	2988	0.057	0.109	0.671473	7.15e-20	2.18e-15	up	Otud5
Fibroblasts	ENSMUSG00000045672	0.629923	0.999335	3428	2988	0.113	0.203	0.665792	2.2e-29	6.7e-25	up	Col27a1
Fibroblasts	ENSMUSG00000022946	0.290172	0.454096	3428	2988	0.059	0.109	0.646091	3.73e-19	1.14e-14	up	Dop1b
Fibroblasts	ENSMUSG00000047216	1.67755	2.60123	3428	2988	0.235	0.361	0.632839	1.2e-27	3.65e-23	up	Cdh19
Fibroblasts	ENSMUSG00000021846	0.650867	1.00687	3428	2988	0.122	0.216	0.629448	1.51e-30	4.59e-26	up	Peli2
Fibroblasts	ENSMUSG00000042055	0.294164	0.454918	3428	2988	0.061	0.106	0.628983	1.25e-14	3.81e-10	up	Wdr11
Fibroblasts	ENSMUSG00000041135	0.359021	0.553948	3428	2988	0.069	0.127	0.62568	4.03e-20	1.23e-15	up	Ripk2
Fibroblasts	ENSMUSG00000117647	0.615604	0.945026	3428	2988	0.107	0.19	0.61835	2.9e-26	8.83e-22	up	Gm49969
Fibroblasts	ENSMUSG00000090394	0.828626	1.26727	3428	2988	0.154	0.258	0.612929	1.02e-29	3.09e-25	up	4930523C07Rik
Fibroblasts	ENSMUSG00000086825	0.283224	0.432956	3428	2988	0.058	0.102	0.612277	2.39e-14	7.27e-10	up	Gm15675
Fibroblasts	ENSMUSG00000035000	0.430531	0.657699	3428	2988	0.069	0.108	0.611311	2.17e-07	0.00661827	up	Dpp4
Fibroblasts	ENSMUSG00000021838	1.64846	2.51799	3428	2988	0.258	0.392	0.611152	2.95e-30	8.99e-26	up	Samd4
Fibroblasts	ENSMUSG00000101674	0.380536	0.579793	3428	2988	0.068	0.112	0.607505	2.3e-11	7.01e-07	up	4930444A19Rik
Fibroblasts	ENSMUSG00000053825	0.467147	0.71159	3428	2988	0.077	0.133	0.607169	6.19e-15	1.89e-10	up	Ppfia2
Fibroblasts	ENSMUSG00000032220	0.442779	0.672195	3428	2988	0.085	0.14	0.602294	7.97e-14	2.43e-09	up	Myo1e
Fibroblasts	ENSMUSG00000029471	0.419733	0.636788	3428	2988	0.084	0.138	0.60134	2.42e-13	7.38e-09	up	Camkk2
Fibroblasts	ENSMUSG00000049119	0.299037	0.452777	3428	2988	0.056	0.101	0.598478	9.5e-17	2.9e-12	up	Fam110b
Fibroblasts	ENSMUSG00000041797	2.67487	4.03668	3428	2988	0.377	0.545	0.593702	2.46e-40	7.5e-36	up	Abca9
Fibroblasts	ENSMUSG00000026589	0.740476	1.11738	3428	2988	0.138	0.232	0.5936	4.51e-28	1.38e-23	up	Sec16b
Fibroblasts	ENSMUSG00000087361	0.446398	0.671969	3428	2988	0.081	0.147	0.590064	1.77e-24	5.38e-20	up	0610043K17Rik
Fibroblasts	ENSMUSG00000071984	2.41532	3.62991	3428	2988	0.328	0.456	0.587716	1.15e-24	3.51e-20	up	Fndc1
Fibroblasts	ENSMUSG00000024778	0.350216	0.526114	3428	2988	0.069	0.122	0.587133	4.04e-19	1.23e-14	up	Fas
Fibroblasts	ENSMUSG00000032826	4.35737	6.53179	3428	2988	0.512	0.673	0.584021	1.82e-41	5.54e-37	up	Ank2
Fibroblasts	ENSMUSG00000025089	1.67009	2.49564	3428	2988	0.24	0.356	0.579483	1.02e-23	3.1e-19	up	Gfra1
Fibroblasts	ENSMUSG00000024381	0.359124	0.535616	3428	2988	0.074	0.12	0.57672	4.74e-12	1.44e-07	up	Bin1
Fibroblasts	ENSMUSG00000001998	0.320818	0.478413	3428	2988	0.063	0.111	0.576502	7.28e-17	2.22e-12	up	Ap4e1
Fibroblasts	ENSMUSG00000030554	0.292223	0.434808	3428	2988	0.06	0.103	0.573306	5.54e-15	1.69e-10	up	Synm
Fibroblasts	ENSMUSG00000020774	1.08087	1.60573	3428	2988	0.174	0.276	0.571031	6.16e-26	1.88e-21	up	Aspa
Fibroblasts	ENSMUSG00000022419	0.579832	0.860738	3428	2988	0.103	0.176	0.56994	2.12e-23	6.46e-19	up	Deptor
Fibroblasts	ENSMUSG00000018425	0.488082	0.724527	3428	2988	0.092	0.157	0.569916	1.3e-20	3.98e-16	up	Dhx40
Fibroblasts	ENSMUSG00000020034	0.425246	0.630956	3428	2988	0.085	0.144	0.569242	8.76e-17	2.67e-12	up	Tcp11l2
Fibroblasts	ENSMUSG00000078190	0.917203	1.35922	3428	2988	0.161	0.273	0.56746	6.31e-35	1.92e-30	up	Dnm3os
Fibroblasts	ENSMUSG00000041757	1.8279	2.70805	3428	2988	0.299	0.464	0.56707	1.43e-45	4.35e-41	up	Plekha6
Fibroblasts	ENSMUSG00000038174	0.35967	0.532598	3428	2988	0.071	0.121	0.566376	9.07e-17	2.76e-12	up	Fam126b
Fibroblasts	ENSMUSG00000099083	0.351566	0.518414	3428	2988	0.075	0.122	0.560311	2.1e-13	6.41e-09	up	Atf7
Fibroblasts	ENSMUSG00000032377	1.72668	2.54588	3428	2988	0.275	0.428	0.560162	3.27e-40	9.96e-36	up	Plscr4
Fibroblasts	ENSMUSG00000020564	0.609348	0.897521	3428	2988	0.115	0.194	0.55868	2.83e-24	8.63e-20	up	Atxn7l1
Fibroblasts	ENSMUSG00000025321	0.592199	0.869478	3428	2988	0.109	0.182	0.554068	5.77e-23	1.76e-18	up	Itgb8
Fibroblasts	ENSMUSG00000001986	0.735678	1.0788	3428	2988	0.118	0.173	0.552277	1.41e-09	4.31e-05	up	Gria3
Fibroblasts	ENSMUSG00000039449	0.327511	0.479293	3428	2988	0.064	0.112	0.549365	1.21e-17	3.69e-13	up	Prpf18
Fibroblasts	ENSMUSG00000041961	0.451401	0.660355	3428	2988	0.085	0.138	0.54883	7.5e-15	2.28e-10	up	Znrf3
Fibroblasts	ENSMUSG00000017144	0.592053	0.865721	3428	2988	0.109	0.18	0.548175	2.96e-21	9.03e-17	up	Rnd3
Fibroblasts	ENSMUSG00000024776	0.357177	0.521545	3428	2988	0.069	0.121	0.54615	6.44e-19	1.96e-14	up	Stambpl1
Fibroblasts	ENSMUSG00000025262	0.393687	0.574742	3428	2988	0.075	0.121	0.545867	1.82e-13	5.55e-09	up	Fam120c
Fibroblasts	ENSMUSG00000021091	0.747036	1.08511	3428	2988	0.125	0.199	0.538597	9.58e-19	2.92e-14	up	Serpina3n
Fibroblasts	ENSMUSG00000028082	3.23894	4.69475	3428	2988	0.443	0.599	0.535527	9.97e-35	3.04e-30	up	Sh3d19
Fibroblasts	ENSMUSG00000031520	0.776689	1.12293	3428	2988	0.134	0.213	0.531864	1.4e-20	4.26e-16	up	Vegfc
Fibroblasts	ENSMUSG00000041440	0.97288	1.40625	3428	2988	0.176	0.273	0.531519	9.73e-25	2.96e-20	up	Gk5
Fibroblasts	ENSMUSG00000027947	0.622551	0.898731	3428	2988	0.117	0.191	0.529697	1.64e-22	4.99e-18	up	Il6ra
Fibroblasts	ENSMUSG00000031093	1.03434	1.49316	3428	2988	0.175	0.288	0.529654	1.14e-34	3.48e-30	up	Dock11
Fibroblasts	ENSMUSG00000041828	18.1613	26.2141	3428	2988	0.873	0.923	0.529475	2.28e-60	6.95e-56	up	Abca8a
Fibroblasts	ENSMUSG00000023963	0.366745	0.528661	3428	2988	0.069	0.116	0.527566	2.74e-15	8.36e-11	up	Cyp39a1
Fibroblasts	ENSMUSG00000020941	0.658052	0.948288	3428	2988	0.126	0.2	0.527123	5.2e-21	1.59e-16	up	Map3k14
Fibroblasts	ENSMUSG00000005533	2.19576	3.14987	3428	2988	0.339	0.484	0.520568	5.2e-32	1.59e-27	up	Igf1r
Fibroblasts	ENSMUSG00000008734	0.455608	0.652201	3428	2988	0.088	0.153	0.517522	2.73e-26	8.32e-22	up	Gprc5b
Fibroblasts	ENSMUSG00000052560	0.864328	1.23444	3428	2988	0.156	0.228	0.514204	4.11e-14	1.25e-09	up	Cpne8
Fibroblasts	ENSMUSG00000028226	0.868535	1.23888	3428	2988	0.143	0.209	0.51238	4.65e-12	1.42e-07	up	Mmp16
Fibroblasts	ENSMUSG00000026637	0.450516	0.641919	3428	2988	0.089	0.146	0.510815	3.13e-17	9.54e-13	up	Traf5
Fibroblasts	ENSMUSG00000029186	0.361586	0.515102	3428	2988	0.071	0.122	0.510517	6.75e-18	2.06e-13	up	Pi4k2b
Fibroblasts	ENSMUSG00000016493	0.474092	0.674959	3428	2988	0.086	0.139	0.509634	1.12e-13	3.42e-09	up	Cd46
Fibroblasts	ENSMUSG00000034724	0.710474	1.00876	3428	2988	0.132	0.219	0.505725	9.98e-30	3.04e-25	up	Cnot6l
Fibroblasts	ENSMUSG00000038065	0.344021	0.488306	3428	2988	0.07	0.113	0.50529	1.28e-13	3.91e-09	up	Mturn
Fibroblasts	ENSMUSG00000023912	0.561308	0.795979	3428	2988	0.106	0.178	0.503938	1.19e-26	3.63e-22	up	Slc25a27
Fibroblasts	ENSMUSG00000028476	0.847859	1.20154	3428	2988	0.155	0.255	0.502985	7.4e-34	2.26e-29	up	Reck
Fibroblasts	ENSMUSG00000025930	0.40082	0.567834	3428	2988	0.073	0.12	0.502515	7.46e-16	2.27e-11	up	Msc
Fibroblasts	ENSMUSG00000051344	0.492129	0.696227	3428	2988	0.088	0.153	0.50052	1.34e-26	4.07e-22	up	Plekhm3
Fibroblasts	ENSMUSG00000040270	0.741369	1.04808	3428	2988	0.128	0.205	0.499479	1.43e-22	4.36e-18	up	Bach2
Fibroblasts	ENSMUSG00000031595	0.592177	0.836937	3428	2988	0.104	0.166	0.499091	9.76e-18	2.97e-13	up	Pdgfrl
Fibroblasts	ENSMUSG00000052407	0.714724	1.0084	3428	2988	0.13	0.202	0.496611	2.81e-18	8.55e-14	up	Ccdc171
Fibroblasts	ENSMUSG00000033075	0.345468	0.487299	3428	2988	0.067	0.112	0.496256	1.74e-15	5.31e-11	up	Senp1
Fibroblasts	ENSMUSG00000052572	1.76878	2.49041	3428	2988	0.26	0.355	0.493626	2.23e-16	6.79e-12	up	Dlg2
Fibroblasts	ENSMUSG00000036568	0.733925	1.03274	3428	2988	0.141	0.228	0.49277	1.12e-27	3.41e-23	up	Bicral
Fibroblasts	ENSMUSG00000039062	0.536472	0.75447	3428	2988	0.104	0.166	0.49196	4.81e-19	1.47e-14	up	Anpep
Fibroblasts	ENSMUSG00000110206	0.411197	0.577873	3428	2988	0.08	0.135	0.490923	3.13e-21	9.54e-17	up	Flt3l
Fibroblasts	ENSMUSG00000062980	6.22693	8.74019	3428	2988	0.641	0.773	0.489144	2.92e-39	8.9e-35	up	Cped1
Fibroblasts	ENSMUSG00000020620	4.84648	6.80241	3428	2988	0.517	0.624	0.489108	7.04e-20	2.15e-15	up	Abca8b
Fibroblasts	ENSMUSG00000032177	0.348543	0.489102	3428	2988	0.068	0.108	0.4888	5.13e-13	1.56e-08	up	Pde4a
Fibroblasts	ENSMUSG00000056919	0.343026	0.479381	3428	2988	0.065	0.109	0.482854	4.13e-15	1.26e-10	up	Cep162
Fibroblasts	ENSMUSG00000061535	4.21778	5.89273	3428	2988	0.473	0.602	0.482454	1.58e-24	4.81e-20	up	C1qtnf7
Fibroblasts	ENSMUSG00000022053	6.1234	8.54302	3428	2988	0.594	0.738	0.480414	2.01e-35	6.13e-31	up	Ebf2
Fibroblasts	ENSMUSG00000004151	0.811461	1.13011	3428	2988	0.139	0.216	0.477874	3.74e-21	1.14e-16	up	Etv1
Fibroblasts	ENSMUSG00000046027	0.422	0.587491	3428	2988	0.079	0.138	0.477324	4.77e-26	1.45e-21	up	Stard5
Fibroblasts	ENSMUSG00000103649	0.401511	0.558894	3428	2988	0.079	0.123	0.477134	1.89e-12	5.77e-08	up	Gm37768
Fibroblasts	ENSMUSG00000027993	0.604391	0.841242	3428	2988	0.112	0.173	0.477037	3.44e-17	1.05e-12	up	Trim2
Fibroblasts	ENSMUSG00000014077	0.380703	0.529722	3428	2988	0.076	0.13	0.476569	4.21e-21	1.28e-16	up	Chp1
Fibroblasts	ENSMUSG00000028345	0.352783	0.490846	3428	2988	0.071	0.114	0.476489	2.95e-14	8.99e-10	up	Tex10
Fibroblasts	ENSMUSG00000089715	0.329473	0.458204	3428	2988	0.068	0.108	0.475829	1.12e-12	3.41e-08	up	Cbx6
Fibroblasts	ENSMUSG00000046314	1.56996	2.18218	3428	2988	0.225	0.342	0.475043	1.6e-28	4.89e-24	up	Stxbp6
Fibroblasts	ENSMUSG00000042675	0.865564	1.2027	3428	2988	0.165	0.272	0.474569	6.77e-41	2.06e-36	up	Ypel3
Fibroblasts	ENSMUSG00000030982	0.445592	0.619009	3428	2988	0.088	0.143	0.474238	4.13e-19	1.26e-14	up	Vps35l
Fibroblasts	ENSMUSG00000087290	0.922801	1.28069	3428	2988	0.154	0.231	0.472836	1.75e-18	5.33e-14	up	Gm15866
Fibroblasts	ENSMUSG00000059669	0.324189	0.449792	3428	2988	0.062	0.101	0.472423	2.46e-13	7.51e-09	up	Taf1b
Fibroblasts	ENSMUSG00000070509	0.910516	1.26131	3428	2988	0.168	0.259	0.47017	1.9e-25	5.78e-21	up	Rgma
Fibroblasts	ENSMUSG00000039089	0.605967	0.839279	3428	2988	0.106	0.165	0.469912	1.98e-16	6.03e-12	up	L3mbtl3
Fibroblasts	ENSMUSG00000049624	0.363293	0.503153	3428	2988	0.07	0.121	0.469865	9.63e-22	2.93e-17	up	Slc17a5
Fibroblasts	ENSMUSG00000027007	0.94712	1.31102	3428	2988	0.18	0.275	0.469076	1.99e-26	6.07e-22	up	Itprid2
Fibroblasts	ENSMUSG00000000538	0.877803	1.21488	3428	2988	0.164	0.254	0.468841	5.45e-28	1.66e-23	up	Tom1l2
Fibroblasts	ENSMUSG00000057722	0.573497	0.792861	3428	2988	0.099	0.144	0.46728	3.32e-09	0.000101154	up	Lepr
Fibroblasts	ENSMUSG00000043017	0.333145	0.460258	3428	2988	0.066	0.11	0.466294	1.78e-17	5.42e-13	up	Ptgir
Fibroblasts	ENSMUSG00000029759	0.540862	0.746824	3428	2988	0.106	0.169	0.465508	1.36e-20	4.14e-16	up	Pon3
Fibroblasts	ENSMUSG00000029442	0.46166	0.637342	3428	2988	0.083	0.137	0.465237	6.41e-18	1.95e-13	up	Wdr66
Fibroblasts	ENSMUSG00000022685	0.434069	0.599241	3428	2988	0.087	0.139	0.465211	1.21e-17	3.67e-13	up	Parn
Fibroblasts	ENSMUSG00000000567	0.403305	0.554674	3428	2988	0.081	0.118	0.459768	4.28e-08	0.00130386	up	Sox9
Fibroblasts	ENSMUSG00000051022	0.469548	0.645472	3428	2988	0.088	0.152	0.459081	4.37e-27	1.33e-22	up	Hs3st1
Fibroblasts	ENSMUSG00000040037	5.52512	7.58903	3428	2988	0.514	0.624	0.457909	1.89e-20	5.77e-16	up	Negr1
Fibroblasts	ENSMUSG00000039230	0.337675	0.4638	3428	2988	0.067	0.109	0.457867	2.21e-15	6.72e-11	up	Tbcd
Fibroblasts	ENSMUSG00000041777	0.368856	0.506545	3428	2988	0.07	0.116	0.457631	1.33e-16	4.05e-12	up	Cir1
Fibroblasts	ENSMUSG00000054203	2.58692	3.5506	3428	2988	0.342	0.472	0.456826	3.64e-26	1.11e-21	up	Ifi205
Fibroblasts	ENSMUSG00000070469	2.36476	3.24282	3428	2988	0.272	0.402	0.455551	2.87e-29	8.75e-25	up	Adamtsl3
Fibroblasts	ENSMUSG00000066842	0.525964	0.720963	3428	2988	0.075	0.113	0.45496	3.87e-08	0.00117916	up	Hmcn1
Fibroblasts	ENSMUSG00000067780	0.74335	1.01865	3428	2988	0.135	0.193	0.454544	1.13e-12	3.45e-08	up	Pi15
Fibroblasts	ENSMUSG00000021461	0.626744	0.858423	3428	2988	0.122	0.192	0.453812	2.3e-21	7e-17	up	Fancc
Fibroblasts	ENSMUSG00000028060	0.644283	0.87907	3428	2988	0.128	0.198	0.448283	1.23e-21	3.76e-17	up	Khdc4
Fibroblasts	ENSMUSG00000028266	0.659584	0.899373	3428	2988	0.125	0.188	0.447362	7.99e-17	2.44e-12	up	Lmo4
Fibroblasts	ENSMUSG00000025816	0.427415	0.582608	3428	2988	0.083	0.137	0.446889	5.97e-21	1.82e-16	up	Sec61a2
Fibroblasts	ENSMUSG00000038241	0.327538	0.445995	3428	2988	0.062	0.103	0.445365	1.75e-15	5.33e-11	up	Cep250
Fibroblasts	ENSMUSG00000029163	1.6304	2.21847	3428	2988	0.272	0.391	0.444333	3.34e-28	1.02e-23	up	Emilin1
Fibroblasts	ENSMUSG00000032265	0.477446	0.64964	3428	2988	0.092	0.143	0.444301	4.41e-15	1.35e-10	up	Tent5a
Fibroblasts	ENSMUSG00000013584	0.45243	0.615516	3428	2988	0.081	0.129	0.444102	2.86e-14	8.71e-10	up	Aldh1a2
Fibroblasts	ENSMUSG00000039942	0.31481	0.428136	3428	2988	0.06	0.101	0.443587	1.92e-17	5.84e-13	up	Ptger4
Fibroblasts	ENSMUSG00000033420	2.28744	3.11082	3428	2988	0.348	0.489	0.44356	1.37e-32	4.17e-28	up	Antxr1
Fibroblasts	ENSMUSG00000055319	0.43089	0.585824	3428	2988	0.085	0.131	0.443147	4.45e-14	1.36e-09	up	Sec23ip
Fibroblasts	ENSMUSG00000040624	0.838132	1.13935	3428	2988	0.152	0.23	0.442963	1.82e-21	5.54e-17	up	Plekhg1
Fibroblasts	ENSMUSG00000063810	0.471155	0.64048	3428	2988	0.086	0.127	0.442952	6.19e-10	1.89e-05	up	Alms1
Fibroblasts	ENSMUSG00000022883	1.39477	1.89425	3428	2988	0.2	0.301	0.441597	1.27e-24	3.88e-20	up	Robo1
Fibroblasts	ENSMUSG00000037697	0.439395	0.596374	3428	2988	0.084	0.141	0.440698	3.12e-23	9.51e-19	up	Ddhd1
Fibroblasts	ENSMUSG00000062054	0.735323	0.997898	3428	2988	0.134	0.222	0.440515	4.69e-35	1.43e-30	up	Iah1
Fibroblasts	ENSMUSG00000042870	0.435162	0.589912	3428	2988	0.087	0.13	0.438947	5.17e-11	1.58e-06	up	Tom1
Fibroblasts	ENSMUSG00000026640	0.889295	1.20464	3428	2988	0.157	0.237	0.437864	7.35e-22	2.24e-17	up	Plxna2
Fibroblasts	ENSMUSG00000039145	7.22242	9.78288	3428	2988	0.742	0.871	0.437777	9.1e-44	2.77e-39	up	Camk1d
Fibroblasts	ENSMUSG00000047714	1.32077	1.78851	3428	2988	0.23	0.321	0.437377	6.52e-19	1.99e-14	up	Ppp1r2
Fibroblasts	ENSMUSG00000050730	1.59752	2.15969	3428	2988	0.256	0.38	0.434987	1.68e-31	5.13e-27	up	Arhgap42
Fibroblasts	ENSMUSG00000031666	0.516085	0.697514	3428	2988	0.097	0.16	0.434614	3.31e-25	1.01e-20	up	Rbl2
Fibroblasts	ENSMUSG00000026768	0.535835	0.724132	3428	2988	0.092	0.135	0.434465	2.81e-10	8.56e-06	up	Itga8
Fibroblasts	ENSMUSG00000003746	4.12903	5.5776	3428	2988	0.497	0.621	0.433841	7.01e-23	2.14e-18	up	Man1a
Fibroblasts	ENSMUSG00000033257	0.361814	0.488261	3428	2988	0.071	0.114	0.432406	1.7e-16	5.18e-12	up	Ttll4
Fibroblasts	ENSMUSG00000086387	0.503568	0.679357	3428	2988	0.09	0.143	0.431983	1.27e-17	3.87e-13	up	Gm15563
Fibroblasts	ENSMUSG00000032549	0.344206	0.46409	3428	2988	0.068	0.113	0.431133	1.79e-17	5.47e-13	up	Rab6b
Fibroblasts	ENSMUSG00000031740	4.54232	6.12291	3428	2988	0.549	0.658	0.430788	9.46e-20	2.88e-15	up	Mmp2
Fibroblasts	ENSMUSG00000040591	0.868299	1.17003	3428	2988	0.153	0.229	0.430278	5.35e-20	1.63e-15	up	1110051M20Rik
Fibroblasts	ENSMUSG00000020715	0.40631	0.54718	3428	2988	0.079	0.13	0.429438	9.17e-20	2.8e-15	up	Ern1
Fibroblasts	ENSMUSG00000029012	0.336932	0.453513	3428	2988	0.068	0.108	0.428685	6.11e-14	1.86e-09	up	Orc5
Fibroblasts	ENSMUSG00000069089	0.408682	0.549963	3428	2988	0.082	0.123	0.428356	3.16e-11	9.64e-07	up	Cdk7
Fibroblasts	ENSMUSG00000017929	0.336482	0.452655	3428	2988	0.065	0.106	0.427882	2.07e-15	6.3e-11	up	B4galt5
Fibroblasts	ENSMUSG00000028469	0.394967	0.531274	3428	2988	0.079	0.128	0.427724	5.92e-19	1.81e-14	up	Npr2
Fibroblasts	ENSMUSG00000061533	0.412516	0.554064	3428	2988	0.078	0.117	0.425602	1.78e-10	5.44e-06	up	Cep128
Fibroblasts	ENSMUSG00000031537	0.432248	0.580442	3428	2988	0.091	0.14	0.425294	2.54e-15	7.73e-11	up	Ikbkb
Fibroblasts	ENSMUSG00000071252	0.9101	1.22198	3428	2988	0.144	0.201	0.425122	1.8e-10	5.49e-06	up	2210408I21Rik
Fibroblasts	ENSMUSG00000028583	0.528779	0.709516	3428	2988	0.105	0.163	0.42417	3.32e-18	1.01e-13	up	Pdpn
Fibroblasts	ENSMUSG00000000392	1.50117	2.01403	3428	2988	0.225	0.301	0.424004	1.29e-12	3.92e-08	up	Fap
Fibroblasts	ENSMUSG00000062761	0.333867	0.447928	3428	2988	0.066	0.106	0.423995	3.1e-14	9.45e-10	up	Zfp512
Fibroblasts	ENSMUSG00000059173	3.89744	5.22768	3428	2988	0.477	0.613	0.423642	1.56e-26	4.76e-22	up	Pde1a
Fibroblasts	ENSMUSG00000102692	0.454903	0.60914	3428	2988	0.074	0.119	0.421215	1.21e-15	3.68e-11	up	Dchs2
Fibroblasts	ENSMUSG00000024260	0.49745	0.66592	3428	2988	0.092	0.153	0.420798	4.22e-24	1.29e-19	up	Sap130
Fibroblasts	ENSMUSG00000022771	0.370928	0.496252	3428	2988	0.074	0.119	0.419936	3.26e-17	9.92e-13	up	Ppil2
Fibroblasts	ENSMUSG00000009681	0.433089	0.579204	3428	2988	0.088	0.131	0.419409	4.67e-13	1.42e-08	up	Bcr
Fibroblasts	ENSMUSG00000068742	0.331403	0.443129	3428	2988	0.067	0.105	0.419138	4.39e-14	1.34e-09	up	Cry2
Fibroblasts	ENSMUSG00000027004	0.43405	0.578704	3428	2988	0.082	0.121	0.414965	6.91e-10	2.11e-05	up	Frzb
Fibroblasts	ENSMUSG00000026014	2.25781	3.00948	3428	2988	0.342	0.468	0.414589	1.32e-26	4.04e-22	up	Raph1
Fibroblasts	ENSMUSG00000021987	0.43202	0.575844	3428	2988	0.087	0.136	0.41458	1.42e-16	4.34e-12	up	Mtmr6
Fibroblasts	ENSMUSG00000063663	0.405872	0.540882	3428	2988	0.075	0.123	0.414288	1.47e-19	4.48e-15	up	Brwd3
Fibroblasts	ENSMUSG00000059439	1.76748	2.35479	3428	2988	0.272	0.39	0.413905	2.93e-27	8.92e-23	up	Bcas3
Fibroblasts	ENSMUSG00000054843	5.03453	6.70332	3428	2988	0.561	0.693	0.413018	3.36e-27	1.02e-22	up	Atrnl1
Fibroblasts	ENSMUSG00000084799	0.346305	0.46107	3428	2988	0.062	0.107	0.412945	1.47e-20	4.48e-16	up	Ino80dos
Fibroblasts	ENSMUSG00000057234	0.404474	0.53675	3428	2988	0.076	0.108	0.408204	3.49e-08	0.00106238	up	Mettl15
Fibroblasts	ENSMUSG00000031758	0.483814	0.641691	3428	2988	0.086	0.129	0.407426	6.04e-12	1.84e-07	up	Cdyl2
Fibroblasts	ENSMUSG00000028152	0.696444	0.923585	3428	2988	0.121	0.187	0.407237	3.05e-20	9.28e-16	up	Tspan5
Fibroblasts	ENSMUSG00000039199	0.345596	0.457945	3428	2988	0.07	0.114	0.406087	1.14e-18	3.46e-14	up	Zdhhc1
Fibroblasts	ENSMUSG00000041272	0.744117	0.985903	3428	2988	0.11	0.157	0.405917	1.32e-10	4.04e-06	up	Tox
Fibroblasts	ENSMUSG00000032754	0.445781	0.590507	3428	2988	0.085	0.136	0.405618	5.85e-19	1.78e-14	up	Slc8b1
Fibroblasts	ENSMUSG00000115317	0.785035	1.0383	3428	2988	0.133	0.213	0.40339	9.77e-28	2.98e-23	up	Gm32618
Fibroblasts	ENSMUSG00000018398	1.18136	1.56238	3428	2988	0.214	0.325	0.403292	1.04e-36	3.16e-32	up	Septin8
Fibroblasts	ENSMUSG00000046318	2.22504	2.94036	3428	2988	0.251	0.327	0.40216	1.24e-11	3.77e-07	up	Ccbe1
Fibroblasts	ENSMUSG00000032000	0.460713	0.608792	3428	2988	0.085	0.132	0.402083	7.38e-15	2.25e-10	up	Birc3
Fibroblasts	ENSMUSG00000042705	0.539763	0.71322	3428	2988	0.102	0.15	0.40202	2.23e-13	6.78e-09	up	Commd10
Fibroblasts	ENSMUSG00000041115	0.6799	0.897899	3428	2988	0.12	0.187	0.40123	7.85e-23	2.39e-18	up	Iqsec2
Fibroblasts	ENSMUSG00000022508	0.605101	0.799079	3428	2988	0.114	0.168	0.401163	4.48e-14	1.36e-09	up	Bcl6
Fibroblasts	ENSMUSG00000040123	0.759716	1.0031	3428	2988	0.141	0.218	0.400934	1.21e-24	3.68e-20	up	Zmym5
Fibroblasts	ENSMUSG00000001741	0.367787	0.485562	3428	2988	0.066	0.105	0.400784	8.65e-15	2.64e-10	up	Il16
Fibroblasts	ENSMUSG00000029924	0.345265	0.455575	3428	2988	0.067	0.117	0.399983	8.45e-28	2.58e-23	up	Slc37a3
Fibroblasts	ENSMUSG00000051359	0.841113	1.10949	3428	2988	0.147	0.214	0.399527	2.16e-15	6.58e-11	up	Ncald
Fibroblasts	ENSMUSG00000019899	19.7791	26.0804	3428	2988	0.917	0.935	0.398985	6.53e-56	1.99e-51	up	Lama2
Fibroblasts	ENSMUSG00000052783	0.368512	0.485365	3428	2988	0.069	0.108	0.397356	1.04e-13	3.17e-09	up	Grk4
Fibroblasts	ENSMUSG00000031561	5.97336	7.86661	3428	2988	0.603	0.706	0.397199	1.02e-20	3.1e-16	up	Tenm3
Fibroblasts	ENSMUSG00000031749	0.465439	0.6128	3428	2988	0.092	0.142	0.396825	2.27e-16	6.91e-12	up	St3gal2
Fibroblasts	ENSMUSG00000042272	0.949392	1.249	3428	2988	0.175	0.264	0.395703	3.39e-27	1.03e-22	up	Sestd1
Fibroblasts	ENSMUSG00000040717	0.399265	0.525179	3428	2988	0.079	0.124	0.395464	3.98e-17	1.21e-12	up	Il17rd
Fibroblasts	ENSMUSG00000036103	2.87645	3.78335	3428	2988	0.397	0.507	0.395373	4.58e-18	1.4e-13	up	Colec12
Fibroblasts	ENSMUSG00000091243	1.0699	1.40426	3428	2988	0.172	0.247	0.392338	1.48e-17	4.5e-13	up	Vgll3
Fibroblasts	ENSMUSG00000021830	0.438433	0.575045	3428	2988	0.086	0.132	0.391319	2e-15	6.09e-11	up	Txndc16
Fibroblasts	ENSMUSG00000085169	0.47442	0.622087	3428	2988	0.087	0.131	0.390953	7.66e-13	2.33e-08	up	Gm10785
Fibroblasts	ENSMUSG00000039982	0.498033	0.652822	3428	2988	0.093	0.154	0.390446	6.94e-28	2.11e-23	up	Dtx4
Fibroblasts	ENSMUSG00000040548	0.576007	0.754357	3428	2988	0.112	0.169	0.389163	7.92e-20	2.41e-15	up	Tex2
Fibroblasts	ENSMUSG00000045038	1.18994	1.5578	3428	2988	0.208	0.297	0.388626	8.56e-22	2.61e-17	up	Prkce
Fibroblasts	ENSMUSG00000019699	3.37305	4.41437	3428	2988	0.459	0.598	0.388153	2.72e-28	8.29e-24	up	Akt3
Fibroblasts	ENSMUSG00000035161	0.876907	1.14711	3428	2988	0.155	0.234	0.387507	2.35e-25	7.16e-21	up	Ints6
Fibroblasts	ENSMUSG00000062822	0.67246	0.879605	3428	2988	0.128	0.2	0.387408	2.05e-26	6.24e-22	up	4833420G17Rik
Fibroblasts	ENSMUSG00000031253	1.20408	1.57496	3428	2988	0.205	0.298	0.387388	1.27e-22	3.86e-18	up	Srpx2
Fibroblasts	ENSMUSG00000025195	0.419375	0.548321	3428	2988	0.084	0.123	0.38678	6.18e-11	1.88e-06	up	Dnmbp
Fibroblasts	ENSMUSG00000044949	0.701469	0.917117	3428	2988	0.131	0.198	0.386727	1.22e-20	3.73e-16	up	Ubtd2
Fibroblasts	ENSMUSG00000003363	0.310631	0.405985	3428	2988	0.064	0.103	0.386224	8.27e-17	2.52e-12	up	Pld3
Fibroblasts	ENSMUSG00000043719	2.72863	3.56017	3428	2988	0.353	0.471	0.383771	1.17e-22	3.58e-18	up	Col6a6
Fibroblasts	ENSMUSG00000026674	2.46955	3.22144	3428	2988	0.374	0.498	0.383454	4.39e-25	1.34e-20	up	Ddr2
Fibroblasts	ENSMUSG00000005534	1.02537	1.33748	3428	2988	0.185	0.274	0.383369	9.1e-28	2.77e-23	up	Insr
Fibroblasts	ENSMUSG00000113136	0.460351	0.599784	3428	2988	0.086	0.13	0.381709	7.41e-14	2.26e-09	up	Gm19951
Fibroblasts	ENSMUSG00000001016	0.446282	0.581445	3428	2988	0.086	0.136	0.381685	1.99e-18	6.07e-14	up	Ilf2
Fibroblasts	ENSMUSG00000058589	0.746548	0.972522	3428	2988	0.116	0.173	0.381496	4.6e-15	1.4e-10	up	Anks1b
Fibroblasts	ENSMUSG00000036916	0.340922	0.443996	3428	2988	0.069	0.106	0.381105	6.79e-14	2.07e-09	up	Zfp280c
Fibroblasts	ENSMUSG00000021365	0.957382	1.24649	3428	2988	0.159	0.225	0.380705	2.56e-15	7.79e-11	up	Nedd9
Fibroblasts	ENSMUSG00000029817	1.48093	1.92758	3428	2988	0.254	0.368	0.380291	6.55e-30	2e-25	up	Tra2a
Fibroblasts	ENSMUSG00000057236	0.657073	0.855188	3428	2988	0.126	0.191	0.380188	1.16e-20	3.54e-16	up	Rbbp4
Fibroblasts	ENSMUSG00000031273	0.573639	0.746451	3428	2988	0.089	0.125	0.379906	7.1e-08	0.00216367	up	Col4a6
Fibroblasts	ENSMUSG00000027364	0.856676	1.11448	3428	2988	0.156	0.221	0.379549	3.27e-15	9.97e-11	up	Usp50
Fibroblasts	ENSMUSG00000035934	1.03167	1.34208	3428	2988	0.183	0.265	0.379493	1.64e-22	5e-18	up	Pknox2
Fibroblasts	ENSMUSG00000002105	0.464715	0.604322	3428	2988	0.093	0.143	0.378971	8.91e-18	2.72e-13	up	Slc39a13
Fibroblasts	ENSMUSG00000028549	0.637712	0.829145	3428	2988	0.106	0.163	0.37872	1.86e-18	5.68e-14	up	Itgb3bp
Fibroblasts	ENSMUSG00000041308	2.0695	2.68983	3428	2988	0.333	0.456	0.378231	4.55e-28	1.39e-23	up	Sntb2
Fibroblasts	ENSMUSG00000002107	25.5798	33.2466	3428	2988	0.924	0.916	0.378202	2.73e-53	8.31e-49	up	Celf2
Fibroblasts	ENSMUSG00000073664	2.79695	3.63349	3428	2988	0.415	0.56	0.377502	3.5e-34	1.07e-29	up	Nbeal1
Fibroblasts	ENSMUSG00000057098	12.5251	16.271	3428	2988	0.782	0.843	0.377483	1.19e-22	3.64e-18	up	Ebf1
Fibroblasts	ENSMUSG00000006920	0.777557	1.00976	3428	2988	0.147	0.218	0.376995	5.82e-22	1.77e-17	up	Ezh1
Fibroblasts	ENSMUSG00000020844	0.981086	1.27393	3428	2988	0.161	0.239	0.376832	1.2e-22	3.64e-18	up	Nxn
Fibroblasts	ENSMUSG00000042410	0.591048	0.767337	3428	2988	0.114	0.169	0.376585	5.16e-17	1.57e-12	up	Agps
Fibroblasts	ENSMUSG00000026034	1.2553	1.62891	3428	2988	0.228	0.339	0.375874	4.03e-36	1.23e-31	up	Clk1
Fibroblasts	ENSMUSG00000001663	0.657871	0.853328	3428	2988	0.123	0.19	0.375295	8.24e-26	2.51e-21	up	Gstt1
Fibroblasts	ENSMUSG00000018340	0.680846	0.88287	3428	2988	0.13	0.195	0.374873	9.18e-21	2.8e-16	up	Anxa6
Fibroblasts	ENSMUSG00000041769	0.568288	0.736687	3428	2988	0.111	0.171	0.374429	3.85e-21	1.17e-16	up	Ppp2r2d
Fibroblasts	ENSMUSG00000031095	0.467859	0.605792	3428	2988	0.089	0.134	0.372749	1.18e-14	3.6e-10	up	Cul4b
Fibroblasts	ENSMUSG00000026825	0.693855	0.898355	3428	2988	0.134	0.207	0.372651	1.01e-26	3.08e-22	up	Dnm1
Fibroblasts	ENSMUSG00000028249	1.00079	1.29535	3428	2988	0.177	0.259	0.372212	3.24e-24	9.88e-20	up	Sdcbp
Fibroblasts	ENSMUSG00000022098	1.00341	1.29867	3428	2988	0.187	0.264	0.37212	1.05e-19	3.19e-15	up	Bmp1
Fibroblasts	ENSMUSG00000037957	0.381824	0.49362	3428	2988	0.073	0.116	0.37049	4.18e-17	1.27e-12	up	Wdr20
Fibroblasts	ENSMUSG00000021464	0.843913	1.09087	3428	2988	0.146	0.216	0.370306	8.72e-21	2.66e-16	up	Ror2
Fibroblasts	ENSMUSG00000038909	0.399843	0.516676	3428	2988	0.08	0.123	0.369824	1.05e-14	3.19e-10	up	Kat7
Fibroblasts	ENSMUSG00000019989	0.373413	0.48231	3428	2988	0.073	0.116	0.36919	3.74e-19	1.14e-14	up	Enpp3
Fibroblasts	ENSMUSG00000022306	8.45269	10.9096	3428	2988	0.706	0.794	0.368114	2.15e-22	6.55e-18	up	Zfpm2
Fibroblasts	ENSMUSG00000025586	0.943239	1.21719	3428	2988	0.166	0.242	0.36786	2.85e-21	8.7e-17	up	Cpeb1
Fibroblasts	ENSMUSG00000056515	0.506025	0.652601	3428	2988	0.095	0.139	0.366992	2.41e-12	7.34e-08	up	Rab31
Fibroblasts	ENSMUSG00000026389	1.58704	2.04518	3428	2988	0.265	0.377	0.365886	9.85e-30	3e-25	up	Steap3
Fibroblasts	ENSMUSG00000040990	0.713562	0.919417	3428	2988	0.131	0.191	0.36568	1.49e-17	4.54e-13	up	Sh3kbp1
Fibroblasts	ENSMUSG00000030768	0.588368	0.758091	3428	2988	0.113	0.173	0.365653	2.46e-20	7.48e-16	up	Disp1
Fibroblasts	ENSMUSG00000036779	0.570899	0.735423	3428	2988	0.112	0.162	0.365338	1.24e-14	3.78e-10	up	Tent4b
Fibroblasts	ENSMUSG00000035948	1.05867	1.36372	3428	2988	0.156	0.22	0.3653	8.02e-15	2.45e-10	up	Acss3
Fibroblasts	ENSMUSG00000032507	0.369564	0.475998	3428	2988	0.071	0.11	0.36513	7.12e-14	2.17e-09	up	Fbxl2
Fibroblasts	ENSMUSG00000021281	0.641113	0.825701	3428	2988	0.118	0.179	0.365042	8.18e-21	2.49e-16	up	Tnfaip2
Fibroblasts	ENSMUSG00000113005	0.690904	0.889777	3428	2988	0.114	0.174	0.364958	4.91e-19	1.5e-14	up	Gm34408
Fibroblasts	ENSMUSG00000026483	1.2538	1.61428	3428	2988	0.212	0.301	0.364586	7.87e-21	2.4e-16	up	Fam129a
Fibroblasts	ENSMUSG00000015243	1.06107	1.36549	3428	2988	0.185	0.259	0.363892	1e-16	3.05e-12	up	Abca1
Fibroblasts	ENSMUSG00000035248	1.0683	1.37462	3428	2988	0.188	0.289	0.363723	1.98e-36	6.04e-32	up	Tut7
Fibroblasts	ENSMUSG00000026072	1.74612	2.24642	3428	2988	0.276	0.385	0.363476	1.62e-25	4.94e-21	up	Il1r1
Fibroblasts	ENSMUSG00000051934	0.44701	0.5748	3428	2988	0.084	0.131	0.362753	4.16e-16	1.27e-11	up	Spats2
Fibroblasts	ENSMUSG00000001761	0.561855	0.722388	3428	2988	0.105	0.152	0.362576	3.22e-12	9.8e-08	up	Smo
Fibroblasts	ENSMUSG00000039765	0.713891	0.917826	3428	2988	0.132	0.205	0.362517	9.34e-27	2.85e-22	up	Cc2d2a
Fibroblasts	ENSMUSG00000039463	0.315262	0.405302	3428	2988	0.062	0.102	0.362445	3.01e-20	9.16e-16	up	Slc9a8
Fibroblasts	ENSMUSG00000049107	0.44234	0.568646	3428	2988	0.081	0.117	0.362377	4.29e-11	1.31e-06	up	Ntf3
Fibroblasts	ENSMUSG00000036501	1.12932	1.45178	3428	2988	0.2	0.299	0.362372	7.73e-33	2.36e-28	up	Fam13b
Fibroblasts	ENSMUSG00000038718	1.07426	1.38096	3428	2988	0.166	0.23	0.362332	4.13e-13	1.26e-08	up	Pbx3
Fibroblasts	ENSMUSG00000021814	0.496423	0.638101	3428	2988	0.098	0.147	0.362216	2.61e-16	7.96e-12	up	Anxa7
Fibroblasts	ENSMUSG00000087259	0.548185	0.704617	3428	2988	0.102	0.152	0.362177	3.38e-15	1.03e-10	up	2610035D17Rik
Fibroblasts	ENSMUSG00000033768	0.3832	0.492515	3428	2988	0.073	0.112	0.362068	5.57e-13	1.7e-08	up	Nrxn2
Fibroblasts	ENSMUSG00000054280	0.354865	0.45589	3428	2988	0.074	0.115	0.361415	5.44e-17	1.66e-12	up	Prr14l
Fibroblasts	ENSMUSG00000057133	1.62005	2.08115	3428	2988	0.273	0.386	0.361338	9.69e-30	2.95e-25	up	Chd6
Fibroblasts	ENSMUSG00000030583	0.366503	0.470786	3428	2988	0.072	0.111	0.361246	7.64e-16	2.33e-11	up	Sipa1l3
Fibroblasts	ENSMUSG00000022957	1.28885	1.65554	3428	2988	0.23	0.336	0.361214	6.05e-32	1.84e-27	up	Itsn1
Fibroblasts	ENSMUSG00000021134	1.39694	1.79339	3428	2988	0.253	0.357	0.360419	4.82e-28	1.47e-23	up	Srsf5
Fibroblasts	ENSMUSG00000016933	0.326742	0.419463	3428	2988	0.065	0.104	0.360395	4.84e-18	1.48e-13	up	Plcg1
Fibroblasts	ENSMUSG00000025583	0.772802	0.991844	3428	2988	0.148	0.217	0.360015	8.64e-21	2.63e-16	up	Rptor
Fibroblasts	ENSMUSG00000079037	0.751099	0.58418	3428	2988	0.143	0.141	-0.36259	6.41e-19	1.95e-14	down	Prnp
Fibroblasts	ENSMUSG00000016427	2.19466	1.70555	3428	2988	0.341	0.308	-0.363762	4.35e-17	1.33e-12	down	Ndufa1
Fibroblasts	ENSMUSG00000028029	0.765098	0.594031	3428	2988	0.138	0.128	-0.365105	4.57e-10	1.39e-05	down	Aimp1
Fibroblasts	ENSMUSG00000034723	0.856557	0.664919	3428	2988	0.16	0.157	-0.36537	4.47e-21	1.36e-16	down	Tmx4
Fibroblasts	ENSMUSG00000011958	0.796595	0.617977	3428	2988	0.147	0.14	-0.366294	1.76e-15	5.37e-11	down	Bnip2
Fibroblasts	ENSMUSG00000016252	5.78701	4.48915	3428	2988	0.65	0.603	-0.366378	1.69e-29	5.14e-25	down	Atp5e
Fibroblasts	ENSMUSG00000047459	0.628593	0.487548	3428	2988	0.117	0.106	-0.366583	2.86e-09	8.72e-05	down	Dynlrb1
Fibroblasts	ENSMUSG00000027404	0.769466	0.596595	3428	2988	0.142	0.135	-0.367105	4.36e-16	1.33e-11	down	Snrpb
Fibroblasts	ENSMUSG00000041028	1.29571	1.00408	3428	2988	0.222	0.205	-0.367874	1.09e-17	3.34e-13	down	Ghitm
Fibroblasts	ENSMUSG00000020372	2.34051	1.81122	3428	2988	0.374	0.341	-0.369858	1.78e-25	5.43e-21	down	Rack1
Fibroblasts	ENSMUSG00000089847	0.610661	0.471924	3428	2988	0.109	0.113	-0.371818	1.62e-18	4.94e-14	down	Timm10b
Fibroblasts	ENSMUSG00000025613	0.691782	0.53353	3428	2988	0.132	0.117	-0.374748	1.14e-08	0.000347573	down	Cct8
Fibroblasts	ENSMUSG00000113902	2.64688	2.03813	3428	2988	0.39	0.35	-0.377044	6.69e-20	2.04e-15	down	Ndufb1-ps
Fibroblasts	ENSMUSG00000006412	0.532564	0.40993	3428	2988	0.102	0.097	-0.377577	1.07e-11	3.26e-07	down	Pfdn2
Fibroblasts	ENSMUSG00000015671	0.776289	0.596949	3428	2988	0.148	0.135	-0.378987	5.5e-13	1.68e-08	down	Psma2
Fibroblasts	ENSMUSG00000022594	0.563825	0.433564	3428	2988	0.109	0.108	-0.379002	3.47e-18	1.06e-13	down	Lynx1
Fibroblasts	ENSMUSG00000020358	0.877193	0.673036	3428	2988	0.164	0.147	-0.382212	1.85e-12	5.64e-08	down	Hnrnpab
Fibroblasts	ENSMUSG00000020681	2.23174	1.70985	3428	2988	0.342	0.31	-0.384299	1.01e-20	3.09e-16	down	Ace
Fibroblasts	ENSMUSG00000078622	1.31133	1.00393	3428	2988	0.23	0.217	-0.385376	2.88e-21	8.77e-17	down	Ccdc47
Fibroblasts	ENSMUSG00000071649	0.615302	0.469903	3428	2988	0.118	0.121	-0.388932	2.68e-23	8.17e-19	down	B3gat3
Fibroblasts	ENSMUSG00000035885	2.40405	1.82096	3428	2988	0.364	0.336	-0.400764	2.71e-27	8.26e-23	down	Cox8a
Fibroblasts	ENSMUSG00000058672	0.589036	0.444731	3428	2988	0.109	0.1	-0.405423	1.4e-09	4.26e-05	down	Tubb2a
Fibroblasts	ENSMUSG00000028495	2.07483	1.56578	3428	2988	0.328	0.298	-0.406109	8.89e-27	2.71e-22	down	Rps6
Fibroblasts	ENSMUSG00000041084	1.50086	1.12995	3428	2988	0.256	0.246	-0.409535	7.49e-29	2.28e-24	down	Ostc
Fibroblasts	ENSMUSG00000015759	0.666399	0.501663	3428	2988	0.131	0.127	-0.409668	1.19e-19	3.62e-15	down	Cnih1
Fibroblasts	ENSMUSG00000118383	0.682401	0.513185	3428	2988	0.124	0.105	-0.411142	3.45e-08	0.00105122	down	Gm50321
Fibroblasts	ENSMUSG00000091337	0.723369	0.542762	3428	2988	0.128	0.124	-0.414411	2.74e-16	8.36e-12	down	Eid1
Fibroblasts	ENSMUSG00000055839	2.04308	1.53242	3428	2988	0.322	0.28	-0.414934	1.18e-17	3.6e-13	down	Elob
Fibroblasts	ENSMUSG00000020519	0.577095	0.432338	3428	2988	0.115	0.104	-0.416649	7.45e-13	2.27e-08	down	Sap30l
Fibroblasts	ENSMUSG00000030744	2.99344	2.24042	3428	2988	0.441	0.387	-0.418038	1.6e-30	4.88e-26	down	Rps3
Fibroblasts	ENSMUSG00000036299	0.721777	0.537067	3428	2988	0.136	0.12	-0.426452	4.17e-12	1.27e-07	down	BC031181
Fibroblasts	ENSMUSG00000023046	3.75009	2.78926	3428	2988	0.404	0.347	-0.427044	5.63e-17	1.72e-12	down	Igfbp6
Fibroblasts	ENSMUSG00000032012	0.701755	0.521633	3428	2988	0.13	0.124	-0.427932	3.85e-17	1.17e-12	down	Nectin1
Fibroblasts	ENSMUSG00000049940	0.733288	0.544636	3428	2988	0.138	0.128	-0.429089	5.77e-16	1.76e-11	down	Pgrmc2
Fibroblasts	ENSMUSG00000032193	0.594711	0.440758	3428	2988	0.106	0.096	-0.432202	1.05e-09	3.19e-05	down	Ldlr
Fibroblasts	ENSMUSG00000059714	0.516566	0.381802	3428	2988	0.101	0.088	-0.43613	1.26e-08	0.000384855	down	Flot1
Fibroblasts	ENSMUSG00000040813	0.608688	0.449336	3428	2988	0.121	0.114	-0.437909	7.85e-20	2.39e-15	down	Tex264
Fibroblasts	ENSMUSG00000045573	1.9975	1.47224	3428	2988	0.268	0.24	-0.440189	5.42e-14	1.65e-09	down	Penk
Fibroblasts	ENSMUSG00000020803	0.726629	0.534948	3428	2988	0.132	0.119	-0.441819	3.81e-14	1.16e-09	down	Txndc17
Fibroblasts	ENSMUSG00000031987	1.09768	0.805425	3428	2988	0.201	0.168	-0.44663	1.1e-12	3.36e-08	down	Egln1
Fibroblasts	ENSMUSG00000054091	0.650553	0.477038	3428	2988	0.116	0.105	-0.447563	7.19e-12	2.19e-07	down	1810037I17Rik
Fibroblasts	ENSMUSG00000043998	0.686939	0.502464	3428	2988	0.13	0.127	-0.451163	8.03e-24	2.45e-19	down	Mgat2
Fibroblasts	ENSMUSG00000027848	1.97233	1.44216	3428	2988	0.317	0.276	-0.451673	1.32e-22	4.01e-18	down	Olfml3
Fibroblasts	ENSMUSG00000018293	1.16338	0.848871	3428	2988	0.208	0.18	-0.454707	1.28e-16	3.9e-12	down	Pfn1
Fibroblasts	ENSMUSG00000028128	0.900046	0.655571	3428	2988	0.158	0.139	-0.457246	3.55e-14	1.08e-09	down	F3
Fibroblasts	ENSMUSG00000033060	0.577871	0.420431	3428	2988	0.102	0.09	-0.458878	3.71e-10	1.13e-05	down	Lmo7
Fibroblasts	ENSMUSG00000020205	0.813677	0.589737	3428	2988	0.144	0.126	-0.464384	2.51e-11	7.65e-07	down	Phlda1
Fibroblasts	ENSMUSG00000024583	0.931548	0.672706	3428	2988	0.173	0.156	-0.469655	3.47e-20	1.06e-15	down	Txnl1
Fibroblasts	ENSMUSG00000028291	0.661929	0.477085	3428	2988	0.123	0.116	-0.472431	2.12e-19	6.45e-15	down	Akirin2
Fibroblasts	ENSMUSG00000073481	0.913321	0.658204	3428	2988	0.174	0.155	-0.472587	2.87e-20	8.75e-16	down	Mtarc2
Fibroblasts	ENSMUSG00000033020	0.635837	0.457581	3428	2988	0.113	0.101	-0.474632	4.4e-12	1.34e-07	down	Polr2f
Fibroblasts	ENSMUSG00000002844	0.5891	0.421743	3428	2988	0.116	0.107	-0.482147	2.47e-17	7.53e-13	down	Adprh
Fibroblasts	ENSMUSG00000031029	0.846978	0.605825	3428	2988	0.155	0.137	-0.483423	1.41e-17	4.31e-13	down	Eif3f
Fibroblasts	ENSMUSG00000029359	0.674318	0.482154	3428	2988	0.12	0.102	-0.483934	5.4e-12	1.65e-07	down	Tesc
Fibroblasts	ENSMUSG00000074743	0.610444	0.435667	3428	2988	0.116	0.095	-0.486633	2.46e-07	0.00749923	down	Thbd
Fibroblasts	ENSMUSG00000061315	2.19487	1.56221	3428	2988	0.353	0.289	-0.490554	3.91e-23	1.19e-18	down	Naca
Fibroblasts	ENSMUSG00000001270	0.785301	0.558798	3428	2988	0.144	0.128	-0.49092	1.5e-14	4.58e-10	down	Ckb
Fibroblasts	ENSMUSG00000005779	0.827962	0.588855	3428	2988	0.155	0.131	-0.491653	1.37e-14	4.16e-10	down	Psmb4
Fibroblasts	ENSMUSG00000026179	0.639422	0.45461	3428	2988	0.118	0.104	-0.492141	4.55e-14	1.39e-09	down	Pnkd
Fibroblasts	ENSMUSG00000020496	0.510447	0.362338	3428	2988	0.101	0.088	-0.494423	6.3e-12	1.92e-07	down	Rnf187
Fibroblasts	ENSMUSG00000019804	0.983585	0.697871	3428	2988	0.176	0.162	-0.495089	2.14e-26	6.53e-22	down	Snx3
Fibroblasts	ENSMUSG00000031168	0.52192	0.369901	3428	2988	0.101	0.091	-0.49669	2.85e-15	8.7e-11	down	Ebp
Fibroblasts	ENSMUSG00000027566	1.13702	0.804827	3428	2988	0.19	0.163	-0.498507	4.69e-16	1.43e-11	down	Psma7
Fibroblasts	ENSMUSG00000067586	0.855463	0.602732	3428	2988	0.152	0.127	-0.50519	1.8e-12	5.47e-08	down	S1pr3
Fibroblasts	ENSMUSG00000020044	5.28682	3.72407	3428	2988	0.536	0.459	-0.50552	5.88e-27	1.79e-22	down	Timp3
Fibroblasts	ENSMUSG00000028932	0.557214	0.392316	3428	2988	0.106	0.096	-0.506215	7.12e-17	2.17e-12	down	Psmc2
Fibroblasts	ENSMUSG00000056612	0.884986	0.623068	3428	2988	0.165	0.132	-0.506264	5.06e-11	1.54e-06	down	Ppp1r14b
Fibroblasts	ENSMUSG00000022136	3.02551	2.12566	3428	2988	0.438	0.376	-0.509264	4.83e-33	1.47e-28	down	Dnajc3
Fibroblasts	ENSMUSG00000034211	0.646465	0.450778	3428	2988	0.123	0.105	-0.520153	3.95e-13	1.2e-08	down	Mrps17
Fibroblasts	ENSMUSG00000063480	0.619207	0.430972	3428	2988	0.118	0.092	-0.522829	3.86e-08	0.00117571	down	Snu13
Fibroblasts	ENSMUSG00000009687	0.968041	0.673409	3428	2988	0.17	0.147	-0.523586	1.56e-15	4.76e-11	down	Fxyd5
Fibroblasts	ENSMUSG00000029918	0.755732	0.521733	3428	2988	0.134	0.113	-0.534563	1.75e-12	5.33e-08	down	Mrps33
Fibroblasts	ENSMUSG00000030588	0.54404	0.373742	3428	2988	0.107	0.094	-0.541668	1.62e-15	4.95e-11	down	Yif1b
Fibroblasts	ENSMUSG00000040562	0.59113	0.405337	3428	2988	0.108	0.098	-0.544352	2.37e-17	7.22e-13	down	Gstm2
Fibroblasts	ENSMUSG00000068523	1.72965	1.18397	3428	2988	0.28	0.234	-0.546849	2.27e-25	6.91e-21	down	Gng5
Fibroblasts	ENSMUSG00000032180	0.567516	0.388465	3428	2988	0.108	0.095	-0.546876	1.02e-15	3.11e-11	down	Tmed1
Fibroblasts	ENSMUSG00000038388	0.833681	0.570136	3428	2988	0.135	0.118	-0.54819	1.34e-14	4.08e-10	down	Mpp6
Fibroblasts	ENSMUSG00000067847	1.08916	0.744244	3428	2988	0.186	0.151	-0.54937	6.31e-15	1.92e-10	down	Romo1
Fibroblasts	ENSMUSG00000066026	0.755703	0.512891	3428	2988	0.142	0.12	-0.559168	1.67e-16	5.09e-12	down	Dhrs3
Fibroblasts	ENSMUSG00000033065	0.573168	0.388638	3428	2988	0.107	0.085	-0.560531	3.54e-11	1.08e-06	down	Pfkm
Fibroblasts	ENSMUSG00000021737	0.53867	0.363902	3428	2988	0.104	0.088	-0.565851	9.2e-14	2.81e-09	down	Psmd6
Fibroblasts	ENSMUSG00000031807	0.663593	0.446864	3428	2988	0.123	0.103	-0.570464	3.57e-15	1.09e-10	down	Pgls
Fibroblasts	ENSMUSG00000059602	1.16991	0.783301	3428	2988	0.195	0.162	-0.578752	6.09e-18	1.85e-13	down	Syn3
Fibroblasts	ENSMUSG00000073889	1.64936	1.09714	3428	2988	0.273	0.229	-0.588153	6.03e-30	1.84e-25	down	Il11ra1
Fibroblasts	ENSMUSG00000022205	0.721496	0.477854	3428	2988	0.135	0.108	-0.594423	7.91e-14	2.41e-09	down	Sub1
Fibroblasts	ENSMUSG00000095098	0.648175	0.421142	3428	2988	0.124	0.103	-0.622076	3.27e-20	9.95e-16	down	Ccdc85b
Fibroblasts	ENSMUSG00000021508	3.36592	2.15384	3428	2988	0.244	0.176	-0.64409	2.81e-15	8.57e-11	down	Cxcl14
Fibroblasts	ENSMUSG00000031848	0.531746	0.339106	3428	2988	0.101	0.079	-0.649001	1.36e-12	4.14e-08	down	Lsm4
Fibroblasts	ENSMUSG00000041361	1.09623	0.673181	3428	2988	0.19	0.139	-0.703487	7.47e-20	2.28e-15	down	Myzap
Fibroblasts	ENSMUSG00000037379	1.12924	0.685018	3428	2988	0.18	0.129	-0.721141	5.62e-16	1.71e-11	down	Spon2
Fibroblasts	ENSMUSG00000027293	0.95408	0.567716	3428	2988	0.162	0.118	-0.748942	8.71e-19	2.66e-14	down	Ehd4
Fibroblasts	ENSMUSG00000021798	1.15102	0.684357	3428	2988	0.195	0.137	-0.750095	2.77e-19	8.45e-15	down	Ldb3
Fibroblasts	ENSMUSG00000023868	1.35647	0.773562	3428	2988	0.183	0.148	-0.810264	1.52e-21	4.64e-17	down	Pde10a
Fibroblasts	ENSMUSG00000025723	1.16114	0.611171	3428	2988	0.17	0.116	-0.925889	3e-23	9.15e-19	down	Nmb
Fibroblasts	ENSMUSG00000027656	1.65716	0.836799	3428	2988	0.188	0.115	-0.985759	9.64e-23	2.94e-18	down	Ccn5
Fibroblasts	ENSMUSG00000079105	4.14546	1.73511	3428	2988	0.316	0.193	-1.2565	3.23e-50	9.85e-46	down	C7
macrophages	ENSMUSG00000037849	0.118703	0.889158	1381	1398	0.022	0.139	2.90508	5.91e-32	1.8e-27	up	Ifi206
macrophages	ENSMUSG00000086074	0.228827	1.01285	1381	1398	0.043	0.167	2.1461	3.15e-27	9.59e-23	up	Gm13274
macrophages	ENSMUSG00000035208	0.409945	1.403	1381	1398	0.073	0.237	1.77501	5.68e-33	1.73e-28	up	Slfn8
macrophages	ENSMUSG00000063193	0.234833	0.748263	1381	1398	0.041	0.138	1.67191	7.79e-20	2.37e-15	up	Cd300lb
macrophages	ENSMUSG00000052776	0.19473	0.604907	1381	1398	0.038	0.122	1.63524	2e-16	6.1e-12	up	Oas1a
macrophages	ENSMUSG00000027322	0.438884	1.29136	1381	1398	0.081	0.237	1.55697	2.42e-29	7.38e-25	up	Siglec1
macrophages	ENSMUSG00000035352	0.882015	2.55381	1381	1398	0.07	0.191	1.53377	9.18e-21	2.8e-16	up	Ccl12
macrophages	ENSMUSG00000022899	0.288992	0.791659	1381	1398	0.056	0.138	1.45385	8.19e-13	2.5e-08	up	Slc15a2
macrophages	ENSMUSG00000043263	0.348831	0.938621	1381	1398	0.06	0.161	1.42802	5.82e-17	1.77e-12	up	Ifi209
macrophages	ENSMUSG00000110631	0.280954	0.687428	1381	1398	0.043	0.103	1.29087	4.02e-09	0.000122537	up	Gm42047
macrophages	ENSMUSG00000041762	0.257972	0.616075	1381	1398	0.051	0.122	1.25589	3.93e-11	1.2e-06	up	Gpr155
macrophages	ENSMUSG00000022240	0.473585	1.02262	1381	1398	0.073	0.142	1.11058	2.22e-08	0.000677887	up	Ctnnd2
macrophages	ENSMUSG00000028459	0.445381	0.958309	1381	1398	0.072	0.151	1.10545	2.42e-10	7.36e-06	up	Cd72
macrophages	ENSMUSG00000071042	0.703716	1.47626	1381	1398	0.122	0.258	1.06889	2.83e-19	8.63e-15	up	Rasgrp3
macrophages	ENSMUSG00000049103	1.21585	2.55006	1381	1398	0.088	0.164	1.06856	4.87e-09	0.000148519	up	Ccr2
macrophages	ENSMUSG00000037816	0.261573	0.542817	1381	1398	0.047	0.113	1.05325	2.65e-11	8.09e-07	up	Fbxw17
macrophages	ENSMUSG00000040528	0.320972	0.665926	1381	1398	0.062	0.136	1.05292	6.12e-11	1.87e-06	up	Milr1
macrophages	ENSMUSG00000039735	0.677074	1.39782	1381	1398	0.118	0.235	1.0458	4.47e-15	1.36e-10	up	Fnbp1l
macrophages	ENSMUSG00000118361	0.299621	0.617098	1381	1398	0.056	0.117	1.04236	2.47e-08	0.000752941	up	Gm50237
macrophages	ENSMUSG00000028019	1.17779	2.42135	1381	1398	0.171	0.28	1.03973	8.78e-13	2.68e-08	up	Pdgfc
macrophages	ENSMUSG00000025017	1.64727	3.34423	1381	1398	0.259	0.448	1.02159	1.31e-25	4e-21	up	Pik3ap1
macrophages	ENSMUSG00000007659	0.709575	1.42595	1381	1398	0.123	0.232	1.0069	3.93e-13	1.2e-08	up	Bcl2l1
macrophages	ENSMUSG00000026321	1.49689	2.98827	1381	1398	0.235	0.423	0.997341	2.07e-25	6.3e-21	up	Tnfrsf11a
macrophages	ENSMUSG00000095609	0.903133	1.77283	1381	1398	0.143	0.265	0.973043	1.05e-14	3.21e-10	up	Gm21188
macrophages	ENSMUSG00000060275	0.489497	0.958697	1381	1398	0.073	0.147	0.969776	6.59e-10	2.01e-05	up	Nrg2
macrophages	ENSMUSG00000003283	0.938651	1.83748	1381	1398	0.156	0.297	0.969065	2.8e-18	8.53e-14	up	Hck
macrophages	ENSMUSG00000026655	0.284687	0.553269	1381	1398	0.051	0.104	0.958607	8.73e-07	0.0266023	up	Fam107b
macrophages	ENSMUSG00000027087	0.811456	1.57127	1381	1398	0.15	0.255	0.953343	2.15e-11	6.54e-07	up	Itgav
macrophages	ENSMUSG00000039853	0.811673	1.57007	1381	1398	0.14	0.253	0.951861	7.05e-13	2.15e-08	up	Trim14
macrophages	ENSMUSG00000021262	0.415983	0.804256	1381	1398	0.077	0.156	0.951129	1.38e-10	4.21e-06	up	Evl
macrophages	ENSMUSG00000002699	0.935971	1.80057	1381	1398	0.165	0.309	0.943916	2.01e-18	6.12e-14	up	Lcp2
macrophages	ENSMUSG00000039783	0.48143	0.911871	1381	1398	0.087	0.16	0.921503	2.12e-08	0.000645978	up	Kmo
macrophages	ENSMUSG00000047804	1.55023	2.92032	1381	1398	0.258	0.441	0.913639	1.56e-23	4.77e-19	up	Akap10
macrophages	ENSMUSG00000006262	0.362966	0.682753	1381	1398	0.076	0.139	0.911528	4.87e-07	0.0148477	up	Mob1b
macrophages	ENSMUSG00000041058	7.21333	13.4949	1381	1398	0.637	0.751	0.903683	1.48e-46	4.52e-42	up	Wwp1
macrophages	ENSMUSG00000034248	0.584689	1.09369	1381	1398	0.113	0.227	0.903467	2.16e-16	6.58e-12	up	Slc25a37
macrophages	ENSMUSG00000037860	0.586843	1.09727	1381	1398	0.105	0.2	0.90287	7.78e-12	2.37e-07	up	Aim2
macrophages	ENSMUSG00000097039	1.28279	2.38744	1381	1398	0.173	0.314	0.89618	2.79e-17	8.52e-13	up	Pvt1
macrophages	ENSMUSG00000021975	0.289429	0.536687	1381	1398	0.053	0.11	0.890871	5.44e-09	0.000165921	up	Ints9
macrophages	ENSMUSG00000030720	0.364791	0.674948	1381	1398	0.071	0.142	0.887705	4.73e-10	1.44e-05	up	Cln3
macrophages	ENSMUSG00000040855	2.00386	3.68381	1381	1398	0.274	0.405	0.87842	2.14e-14	6.53e-10	up	Reps2
macrophages	ENSMUSG00000045763	0.475243	0.870732	1381	1398	0.077	0.139	0.873562	1.58e-07	0.00482801	up	Basp1
macrophages	ENSMUSG00000032020	1.25852	2.287	1381	1398	0.209	0.342	0.861735	3.63e-14	1.11e-09	up	Ubash3b
macrophages	ENSMUSG00000031295	0.691602	1.25182	1381	1398	0.124	0.237	0.856018	5.42e-15	1.65e-10	up	Phka2
macrophages	ENSMUSG00000072889	1.31472	2.37611	1381	1398	0.218	0.361	0.853847	7.73e-16	2.36e-11	up	Nfxl1
macrophages	ENSMUSG00000024696	0.602462	1.08852	1381	1398	0.105	0.192	0.853429	1.63e-10	4.96e-06	up	Lpxn
macrophages	ENSMUSG00000042684	0.324432	0.579375	1381	1398	0.058	0.115	0.83658	1.97e-08	0.000600675	up	Npl
macrophages	ENSMUSG00000044768	0.472821	0.843228	1381	1398	0.091	0.172	0.83463	1.62e-10	4.95e-06	up	D1Ertd622e
macrophages	ENSMUSG00000025804	0.388809	0.690527	1381	1398	0.062	0.132	0.828638	2.73e-11	8.33e-07	up	Ccr1
macrophages	ENSMUSG00000029330	0.294221	0.522516	1381	1398	0.054	0.113	0.828574	1.15e-09	3.49e-05	up	Cds1
macrophages	ENSMUSG00000051506	1.31641	2.33049	1381	1398	0.21	0.353	0.824026	4.94e-16	1.5e-11	up	Wdfy4
macrophages	ENSMUSG00000018507	0.245431	0.433784	1381	1398	0.048	0.101	0.821659	1.66e-09	5.07e-05	up	Trpv2
macrophages	ENSMUSG00000027035	1.20005	2.12001	1381	1398	0.199	0.32	0.820976	1.32e-12	4.03e-08	up	Cers6
macrophages	ENSMUSG00000034116	0.509829	0.89249	1381	1398	0.091	0.175	0.807824	3.54e-12	1.08e-07	up	Vav1
macrophages	ENSMUSG00000022010	1.52976	2.67664	1381	1398	0.256	0.42	0.807111	6.88e-19	2.1e-14	up	Tsc22d1
macrophages	ENSMUSG00000055805	0.50213	0.871738	1381	1398	0.096	0.17	0.795835	1.51e-08	0.0004604	up	Fmnl1
macrophages	ENSMUSG00000013787	0.296172	0.509204	1381	1398	0.056	0.112	0.781808	9.25e-09	0.000281862	up	Ehmt2
macrophages	ENSMUSG00000052085	5.0007	8.58127	1381	1398	0.553	0.691	0.779062	1.95e-27	5.93e-23	up	Dock8
macrophages	ENSMUSG00000027959	0.519476	0.891173	1381	1398	0.096	0.17	0.778647	1.54e-08	0.000470655	up	Sass6
macrophages	ENSMUSG00000040710	1.90015	3.25884	1381	1398	0.274	0.411	0.778247	7.93e-14	2.42e-09	up	St8sia4
macrophages	ENSMUSG00000037731	0.48471	0.831159	1381	1398	0.087	0.159	0.778004	4.61e-09	0.000140484	up	Themis2
macrophages	ENSMUSG00000085684	0.54005	0.923838	1381	1398	0.091	0.183	0.774546	2.2e-15	6.71e-11	up	4930469K13Rik
macrophages	ENSMUSG00000016477	0.353391	0.603564	1381	1398	0.065	0.119	0.77224	1.35e-06	0.0411399	up	E2f3
macrophages	ENSMUSG00000029009	0.365112	0.622917	1381	1398	0.064	0.139	0.770703	1.03e-14	3.13e-10	up	Mthfr
macrophages	ENSMUSG00000030766	1.54282	2.63095	1381	1398	0.264	0.426	0.770016	3.22e-18	9.81e-14	up	Arhgap17
macrophages	ENSMUSG00000018654	2.06352	3.51576	1381	1398	0.303	0.457	0.768732	6.61e-17	2.02e-12	up	Ikzf1
macrophages	ENSMUSG00000025314	6.49121	11.0284	1381	1398	0.644	0.775	0.764666	9.98e-35	3.04e-30	up	Ptprj
macrophages	ENSMUSG00000017631	0.842873	1.43012	1381	1398	0.135	0.226	0.762752	1.22e-09	3.72e-05	up	Abr
macrophages	ENSMUSG00000066800	0.363748	0.615453	1381	1398	0.069	0.136	0.758711	3.1e-11	9.46e-07	up	Rnasel
macrophages	ENSMUSG00000036246	0.550161	0.92851	1381	1398	0.099	0.185	0.755063	3.26e-11	9.93e-07	up	Gmip
macrophages	ENSMUSG00000032046	2.02804	3.41519	1381	1398	0.308	0.474	0.751879	1.32e-18	4.02e-14	up	Abhd12
macrophages	ENSMUSG00000036155	1.32699	2.22652	1381	1398	0.23	0.354	0.746631	4.48e-12	1.37e-07	up	Mgat5
macrophages	ENSMUSG00000032322	0.268401	0.448207	1381	1398	0.052	0.102	0.739775	1.55e-07	0.00471287	up	Pstpip1
macrophages	ENSMUSG00000060131	1.38988	2.31884	1381	1398	0.203	0.304	0.738439	4.16e-09	0.000126911	up	Atp8b4
macrophages	ENSMUSG00000039193	0.467632	0.780107	1381	1398	0.091	0.162	0.7383	9.93e-09	0.000302742	up	Nlrc4
macrophages	ENSMUSG00000029434	0.301648	0.501726	1381	1398	0.056	0.108	0.734035	2.96e-08	0.000900892	up	Vps33a
macrophages	ENSMUSG00000112843	0.641625	1.0643	1381	1398	0.11	0.209	0.730106	2.89e-14	8.82e-10	up	Gm46224
macrophages	ENSMUSG00000040613	2.59294	4.29212	1381	1398	0.331	0.464	0.727101	1.37e-12	4.16e-08	up	Apobec1
macrophages	ENSMUSG00000041354	0.346206	0.573052	1381	1398	0.066	0.122	0.727034	1.82e-08	0.000553636	up	Rgl2
macrophages	ENSMUSG00000039531	1.38674	2.29303	1381	1398	0.232	0.379	0.725563	1.29e-16	3.95e-12	up	Zup1
macrophages	ENSMUSG00000022305	0.290391	0.477497	1381	1398	0.054	0.104	0.717496	4.21e-08	0.0012836	up	Lrp12
macrophages	ENSMUSG00000067879	0.566645	0.929104	1381	1398	0.101	0.187	0.713393	3.77e-12	1.15e-07	up	Vxn
macrophages	ENSMUSG00000024539	0.393761	0.643563	1381	1398	0.079	0.138	0.708762	2.52e-07	0.00768025	up	Ptpn2
macrophages	ENSMUSG00000020271	0.832706	1.35896	1381	1398	0.154	0.256	0.706621	5e-11	1.52e-06	up	Fbxw11
macrophages	ENSMUSG00000034453	0.312835	0.509753	1381	1398	0.06	0.111	0.704397	3e-07	0.00914833	up	Polr3b
macrophages	ENSMUSG00000099398	0.474467	0.77311	1381	1398	0.085	0.144	0.704366	1.02e-06	0.0311576	up	Ms4a14
macrophages	ENSMUSG00000045210	0.600683	0.978531	1381	1398	0.114	0.194	0.704013	5.8e-09	0.000176876	up	Vcpip1
macrophages	ENSMUSG00000028970	0.697564	1.13143	1381	1398	0.117	0.202	0.697747	3.41e-10	1.04e-05	up	Abcb1b
macrophages	ENSMUSG00000024235	0.51032	0.824841	1381	1398	0.093	0.162	0.692715	1.36e-08	0.000415597	up	Map3k8
macrophages	ENSMUSG00000044042	1.10872	1.78993	1381	1398	0.174	0.283	0.691015	2.05e-11	6.23e-07	up	Fmn1
macrophages	ENSMUSG00000028136	0.729778	1.17751	1381	1398	0.138	0.235	0.690212	2.65e-11	8.07e-07	up	Snx27
macrophages	ENSMUSG00000031613	2.38722	3.84586	1381	1398	0.306	0.416	0.687975	1.06e-09	3.23e-05	up	Hpgd
macrophages	ENSMUSG00000024691	0.634261	1.01628	1381	1398	0.114	0.192	0.680145	4.82e-09	0.000146822	up	Fam111a
macrophages	ENSMUSG00000111535	0.962688	1.5406	1381	1398	0.14	0.223	0.678356	3.31e-08	0.00100965	up	Gm35154
macrophages	ENSMUSG00000031367	0.665574	1.06319	1381	1398	0.122	0.202	0.675729	6.25e-09	0.000190491	up	Ap1s2
macrophages	ENSMUSG00000041362	1.54125	2.46075	1381	1398	0.248	0.384	0.674991	1.01e-13	3.09e-09	up	Shtn1
macrophages	ENSMUSG00000070390	1.19748	1.90045	1381	1398	0.189	0.29	0.666342	3.42e-09	0.000104298	up	Nlrp1b
macrophages	ENSMUSG00000025743	0.68084	1.08019	1381	1398	0.128	0.211	0.665891	4.4e-09	0.000133999	up	Sdc3
macrophages	ENSMUSG00000029919	1.74403	2.76663	1381	1398	0.266	0.398	0.665709	1.24e-12	3.77e-08	up	Hpgds
macrophages	ENSMUSG00000038013	0.316733	0.500546	1381	1398	0.059	0.109	0.660237	2.1e-07	0.00639942	up	Wipf2
macrophages	ENSMUSG00000010097	0.285448	0.451019	1381	1398	0.057	0.103	0.65996	7.07e-07	0.0215593	up	Nxf1
macrophages	ENSMUSG00000044350	1.62048	2.55399	1381	1398	0.245	0.36	0.656337	4.06e-10	1.24e-05	up	Lacc1
macrophages	ENSMUSG00000032698	0.672483	1.0579	1381	1398	0.124	0.217	0.653639	1.07e-12	3.27e-08	up	Lmo2
macrophages	ENSMUSG00000008496	1.10584	1.73704	1381	1398	0.172	0.258	0.651483	1.18e-07	0.0035974	up	Pou2f2
macrophages	ENSMUSG00000052821	0.761037	1.19152	1381	1398	0.133	0.207	0.646768	3.81e-07	0.0116077	up	Cysltr1
macrophages	ENSMUSG00000054520	0.561357	0.878886	1381	1398	0.104	0.167	0.646758	1.62e-06	0.0492826	up	Sh3bp2
macrophages	ENSMUSG00000027787	0.303504	0.472903	1381	1398	0.059	0.107	0.639829	4.44e-07	0.0135273	up	Nmd3
macrophages	ENSMUSG00000009555	0.303252	0.47201	1381	1398	0.059	0.109	0.6383	5.85e-08	0.00178217	up	Cdk9
macrophages	ENSMUSG00000053158	0.511439	0.791995	1381	1398	0.098	0.173	0.63093	1.76e-10	5.35e-06	up	Fes
macrophages	ENSMUSG00000006676	0.36006	0.557487	1381	1398	0.069	0.124	0.630702	3.55e-08	0.00108088	up	Usp19
macrophages	ENSMUSG00000034330	0.953137	1.47307	1381	1398	0.167	0.251	0.628073	1.4e-07	0.00426473	up	Plcg2
macrophages	ENSMUSG00000040560	0.678629	1.04806	1381	1398	0.127	0.207	0.627025	5.14e-09	0.000156746	up	Wdr7
macrophages	ENSMUSG00000027544	1.03879	1.60026	1381	1398	0.186	0.279	0.623396	3.04e-08	0.000927481	up	Nfatc2
macrophages	ENSMUSG00000086220	0.967783	1.48748	1381	1398	0.164	0.253	0.620113	1.4e-08	0.000426687	up	Gm16599
macrophages	ENSMUSG00000034041	0.348053	0.534479	1381	1398	0.065	0.119	0.618828	5.42e-09	0.000165116	up	Lyl1
macrophages	ENSMUSG00000039936	0.884694	1.35854	1381	1398	0.146	0.255	0.618809	4.59e-14	1.4e-09	up	Pik3cd
macrophages	ENSMUSG00000090942	0.338658	0.520006	1381	1398	0.057	0.113	0.618699	2.2e-10	6.72e-06	up	F830016B08Rik
macrophages	ENSMUSG00000039621	1.08928	1.6692	1381	1398	0.19	0.288	0.61579	3.6e-09	0.000109646	up	Prex1
macrophages	ENSMUSG00000045404	1.76788	2.70788	1381	1398	0.263	0.378	0.615143	5.06e-10	1.54e-05	up	Kcnk13
macrophages	ENSMUSG00000035673	0.443288	0.67788	1381	1398	0.08	0.14	0.612784	2.08e-08	0.000632493	up	Sbno2
macrophages	ENSMUSG00000022488	1.31886	2.01618	1381	1398	0.224	0.353	0.612334	1.54e-13	4.71e-09	up	Nckap1l
macrophages	ENSMUSG00000031402	0.670302	1.02181	1381	1398	0.121	0.2	0.608238	1.31e-09	4e-05	up	Mpp1
macrophages	ENSMUSG00000028830	0.544329	0.82868	1381	1398	0.102	0.17	0.606337	4.71e-09	0.000143627	up	AU040320
macrophages	ENSMUSG00000024013	1.25677	1.91313	1381	1398	0.208	0.313	0.606214	1.29e-09	3.92e-05	up	Fgd2
macrophages	ENSMUSG00000052609	0.632051	0.962121	1381	1398	0.121	0.195	0.606177	2.56e-08	0.00078155	up	Plekhg3
macrophages	ENSMUSG00000006127	0.375373	0.569082	1381	1398	0.074	0.128	0.60031	2.82e-07	0.00859563	up	Inpp5k
macrophages	ENSMUSG00000005621	0.510002	0.773017	1381	1398	0.097	0.16	0.599999	5.18e-08	0.00157889	up	Zfp592
macrophages	ENSMUSG00000021423	3.19571	4.84376	1381	1398	0.419	0.531	0.599992	3.1e-10	9.46e-06	up	Ly86
macrophages	ENSMUSG00000027522	1.72124	2.60733	1381	1398	0.287	0.426	0.599122	1.68e-13	5.13e-09	up	Stx16
macrophages	ENSMUSG00000021998	3.9838	6.03232	1381	1398	0.463	0.595	0.598568	2.9e-13	8.83e-09	up	Lcp1
macrophages	ENSMUSG00000044583	1.18818	1.79674	1381	1398	0.195	0.31	0.59663	1.26e-12	3.83e-08	up	Tlr7
macrophages	ENSMUSG00000042331	1.17159	1.77013	1381	1398	0.19	0.276	0.59539	4.54e-07	0.0138364	up	Specc1
macrophages	ENSMUSG00000055817	0.697652	1.05129	1381	1398	0.13	0.205	0.591583	1.28e-07	0.00389182	up	Mta3
macrophages	ENSMUSG00000023008	0.331248	0.498923	1381	1398	0.059	0.109	0.590909	1.5e-07	0.00458238	up	Fmnl3
macrophages	ENSMUSG00000038886	0.413406	0.62203	1381	1398	0.077	0.135	0.589426	3.78e-09	0.000115295	up	Man2a2
macrophages	ENSMUSG00000046805	1.27243	1.91346	1381	1398	0.188	0.287	0.588597	1.81e-09	5.5e-05	up	Mpeg1
macrophages	ENSMUSG00000016018	0.456378	0.685994	1381	1398	0.085	0.151	0.587968	2.63e-10	8e-06	up	Mtrex
macrophages	ENSMUSG00000043411	0.813314	1.22222	1381	1398	0.151	0.247	0.58762	7.23e-12	2.2e-07	up	Usp48
macrophages	ENSMUSG00000033033	0.431559	0.64839	1381	1398	0.083	0.141	0.587302	9.94e-08	0.0030282	up	Calhm2
macrophages	ENSMUSG00000070031	0.383302	0.574191	1381	1398	0.072	0.123	0.58305	4.42e-07	0.0134681	up	Sp140
macrophages	ENSMUSG00000020437	0.461259	0.690671	1381	1398	0.086	0.144	0.582422	3.7e-08	0.00112655	up	Myo1g
macrophages	ENSMUSG00000039318	0.774146	1.15642	1381	1398	0.146	0.221	0.57899	6.08e-07	0.0185242	up	Rab3gap2
macrophages	ENSMUSG00000008200	0.937098	1.39956	1381	1398	0.176	0.283	0.578705	1.42e-12	4.33e-08	up	Fnbp4
macrophages	ENSMUSG00000025184	0.971411	1.45073	1381	1398	0.174	0.259	0.578629	1.44e-07	0.00439266	up	R3hcc1l
macrophages	ENSMUSG00000040044	0.768522	1.14588	1381	1398	0.143	0.229	0.576301	8.45e-10	2.57e-05	up	Orc3
macrophages	ENSMUSG00000047126	3.81655	5.67715	1381	1398	0.485	0.634	0.572898	9.19e-16	2.8e-11	up	Cltc
macrophages	ENSMUSG00000078122	3.76202	5.59568	1381	1398	0.44	0.549	0.572807	2.9e-10	8.83e-06	up	F630028O10Rik
macrophages	ENSMUSG00000038855	1.66142	2.45804	1381	1398	0.231	0.346	0.565091	3.42e-11	1.04e-06	up	Itpkb
macrophages	ENSMUSG00000036840	0.393316	0.581378	1381	1398	0.074	0.127	0.563787	3.93e-08	0.00119823	up	Siah1a
macrophages	ENSMUSG00000022831	0.437739	0.646955	1381	1398	0.085	0.144	0.563594	1.73e-08	0.000527089	up	Hcls1
macrophages	ENSMUSG00000026341	2.8464	4.19723	1381	1398	0.405	0.542	0.560299	2e-12	6.1e-08	up	Actr3
macrophages	ENSMUSG00000053819	2.53203	3.73157	1381	1398	0.358	0.464	0.559489	5.99e-08	0.00182635	up	Camk2d
macrophages	ENSMUSG00000059436	0.442456	0.651627	1381	1398	0.085	0.147	0.558513	5.67e-09	0.00017267	up	Max
macrophages	ENSMUSG00000021820	0.449387	0.661127	1381	1398	0.088	0.141	0.556969	1.13e-06	0.034498	up	Camk2g
macrophages	ENSMUSG00000038250	0.389175	0.571861	1381	1398	0.071	0.128	0.555248	3.77e-10	1.15e-05	up	Usp38
macrophages	ENSMUSG00000040522	0.59716	0.876778	1381	1398	0.106	0.172	0.554095	6.01e-08	0.00183118	up	Tlr8
macrophages	ENSMUSG00000056124	1.26618	1.85717	1381	1398	0.205	0.315	0.552626	2.83e-11	8.64e-07	up	B4galt6
macrophages	ENSMUSG00000020573	0.571703	0.837701	1381	1398	0.106	0.175	0.55117	7.85e-10	2.39e-05	up	Pik3cg
macrophages	ENSMUSG00000048865	1.30552	1.91234	1381	1398	0.227	0.35	0.550715	6.92e-13	2.11e-08	up	Arhgap30
macrophages	ENSMUSG00000032750	1.29573	1.89382	1381	1398	0.208	0.293	0.547532	1.34e-06	0.0409882	up	Gab3
macrophages	ENSMUSG00000025437	0.723604	1.05701	1381	1398	0.129	0.2	0.54672	1.42e-07	0.00432499	up	Usp33
macrophages	ENSMUSG00000015733	1.6214	2.36657	1381	1398	0.277	0.393	0.545561	2.74e-10	8.36e-06	up	Capza2
macrophages	ENSMUSG00000005102	0.328314	0.478635	1381	1398	0.064	0.112	0.543848	1.38e-07	0.00421106	up	Eif2ak4
macrophages	ENSMUSG00000049744	9.68139	14.0981	1381	1398	0.706	0.762	0.542216	2.49e-20	7.6e-16	up	Arhgap15
macrophages	ENSMUSG00000024993	0.462752	0.672873	1381	1398	0.09	0.145	0.540096	6.53e-07	0.0198924	up	Fam45a
macrophages	ENSMUSG00000024672	3.01593	4.3776	1381	1398	0.388	0.491	0.537538	3.56e-08	0.00108482	up	Ms4a7
macrophages	ENSMUSG00000079227	1.91071	2.76684	1381	1398	0.247	0.352	0.534126	3.26e-09	9.95e-05	up	Ccr5
macrophages	ENSMUSG00000028552	4.11375	5.9436	1381	1398	0.519	0.626	0.530884	1.37e-11	4.16e-07	up	Eps15
macrophages	ENSMUSG00000027303	2.39649	3.45983	1381	1398	0.369	0.496	0.529778	1.03e-10	3.14e-06	up	Ptpra
macrophages	ENSMUSG00000038910	3.06984	4.42804	1381	1398	0.41	0.54	0.528505	1.97e-11	6e-07	up	Plcl2
macrophages	ENSMUSG00000038843	0.429754	0.61946	1381	1398	0.075	0.127	0.5275	5.61e-07	0.0170921	up	Gcnt1
macrophages	ENSMUSG00000001687	1.38315	1.99259	1381	1398	0.231	0.337	0.526681	2.18e-09	6.64e-05	up	Ubl3
macrophages	ENSMUSG00000031659	1.30286	1.87533	1381	1398	0.207	0.32	0.52547	1.75e-12	5.33e-08	up	Adcy7
macrophages	ENSMUSG00000031214	4.6501	6.6825	1381	1398	0.507	0.597	0.523125	1.09e-09	3.31e-05	up	Ophn1
macrophages	ENSMUSG00000040383	0.406533	0.584083	1381	1398	0.075	0.122	0.522801	1.26e-06	0.0382972	up	Aqr
macrophages	ENSMUSG00000046836	0.35105	0.504036	1381	1398	0.066	0.111	0.52185	9.28e-07	0.0282887	up	Brox
macrophages	ENSMUSG00000041112	6.72967	9.65666	1381	1398	0.645	0.754	0.520987	5.1e-18	1.55e-13	up	Elmo1
macrophages	ENSMUSG00000034663	1.95317	2.80202	1381	1398	0.302	0.429	0.520648	1.22e-11	3.71e-07	up	Bmp2k
macrophages	ENSMUSG00000048170	0.879256	1.26077	1381	1398	0.161	0.249	0.519953	1.03e-09	3.13e-05	up	Mcmbp
macrophages	ENSMUSG00000018076	1.49133	2.13442	1381	1398	0.254	0.355	0.517246	5.01e-08	0.00152732	up	Med13l
macrophages	ENSMUSG00000070780	2.5302	3.61926	1381	1398	0.356	0.484	0.516442	6.54e-11	1.99e-06	up	Rbm47
macrophages	ENSMUSG00000056069	2.06331	2.94711	1381	1398	0.296	0.425	0.514342	9.46e-12	2.88e-07	up	Otulinl
macrophages	ENSMUSG00000029501	0.600082	0.855036	1381	1398	0.114	0.185	0.510825	6.25e-10	1.91e-05	up	Ankle2
macrophages	ENSMUSG00000021458	2.08975	2.97726	1381	1398	0.301	0.395	0.510654	1.44e-06	0.0437667	up	Aopep
macrophages	ENSMUSG00000030180	0.889826	1.26738	1381	1398	0.159	0.237	0.51026	2.41e-07	0.00735642	up	Kdm5a
macrophages	ENSMUSG00000055239	1.02654	1.45733	1381	1398	0.185	0.268	0.505531	2.49e-07	0.00760384	up	Kcmf1
macrophages	ENSMUSG00000060216	1.19449	1.69568	1381	1398	0.207	0.308	0.505473	5.67e-10	1.73e-05	up	Arrb2
macrophages	ENSMUSG00000022307	1.59562	2.26507	1381	1398	0.245	0.343	0.505436	3.73e-08	0.00113576	up	Oxr1
macrophages	ENSMUSG00000035181	1.50425	2.1314	1381	1398	0.251	0.356	0.502749	1.18e-09	3.59e-05	up	Heatr5a
macrophages	ENSMUSG00000031015	1.1716	1.65937	1381	1398	0.203	0.305	0.502148	3.49e-10	1.06e-05	up	Swap70
macrophages	ENSMUSG00000074305	3.6491	5.16746	1381	1398	0.447	0.559	0.501914	4.93e-09	0.000150223	up	Peak1
macrophages	ENSMUSG00000020120	0.753952	1.06677	1381	1398	0.133	0.203	0.500706	5.85e-07	0.0178263	up	Plek
macrophages	ENSMUSG00000086016	0.648975	0.917447	1381	1398	0.109	0.17	0.499462	3.38e-07	0.010313	up	1700084C06Rik
macrophages	ENSMUSG00000027293	2.77768	3.92494	1381	1398	0.4	0.519	0.498787	2.44e-09	7.44e-05	up	Ehd4
macrophages	ENSMUSG00000026771	0.909162	1.28409	1381	1398	0.164	0.258	0.498143	2.3e-11	7e-07	up	Spopl
macrophages	ENSMUSG00000034154	1.0756	1.51673	1381	1398	0.189	0.277	0.495825	4.17e-08	0.00127193	up	Ino80
macrophages	ENSMUSG00000058835	2.83981	4.00013	1381	1398	0.418	0.532	0.494254	1.62e-09	4.94e-05	up	Abi1
macrophages	ENSMUSG00000052688	0.601001	0.8465	1381	1398	0.106	0.165	0.494142	3.99e-07	0.0121546	up	Rab7b
macrophages	ENSMUSG00000039934	0.975813	1.37138	1381	1398	0.161	0.234	0.490955	3.44e-07	0.0104743	up	Gsap
macrophages	ENSMUSG00000018171	1.49258	2.09679	1381	1398	0.243	0.342	0.490377	1.84e-08	0.00056093	up	Vmp1
macrophages	ENSMUSG00000037306	2.00934	2.81566	1381	1398	0.306	0.411	0.48675	6.91e-08	0.00210652	up	Man1c1
macrophages	ENSMUSG00000051853	0.336366	0.469853	1381	1398	0.063	0.104	0.482178	1.48e-06	0.0451457	up	Arf3
macrophages	ENSMUSG00000021133	2.54351	3.55006	1381	1398	0.37	0.493	0.481027	4.45e-10	1.36e-05	up	Susd6
macrophages	ENSMUSG00000055024	1.45317	2.0282	1381	1398	0.253	0.359	0.480999	2.72e-09	8.29e-05	up	Ep300
macrophages	ENSMUSG00000037533	2.04044	2.84649	1381	1398	0.316	0.425	0.480302	1.42e-08	0.000431518	up	Rapgef6
macrophages	ENSMUSG00000020152	2.14589	2.98913	1381	1398	0.344	0.466	0.478149	3.07e-10	9.35e-06	up	Actr2
macrophages	ENSMUSG00000038147	2.10306	2.92345	1381	1398	0.295	0.397	0.475182	9.09e-08	0.00276994	up	Cd84
macrophages	ENSMUSG00000006281	1.10289	1.53072	1381	1398	0.195	0.286	0.472925	2.56e-09	7.79e-05	up	Tep1
macrophages	ENSMUSG00000054509	0.659958	0.915876	1381	1398	0.124	0.188	0.472776	1.41e-07	0.00430229	up	Parp4
macrophages	ENSMUSG00000069662	1.6458	2.28179	1381	1398	0.26	0.365	0.471373	2.85e-09	8.69e-05	up	Marcks
macrophages	ENSMUSG00000004508	7.00788	9.70526	1381	1398	0.634	0.726	0.469789	1.36e-12	4.15e-08	up	Gab2
macrophages	ENSMUSG00000024054	1.5214	2.10439	1381	1398	0.251	0.354	0.468003	8.82e-09	0.00026883	up	Smchd1
macrophages	ENSMUSG00000022353	3.74178	5.17259	1381	1398	0.458	0.552	0.467162	2.12e-07	0.00645737	up	Mtss1
macrophages	ENSMUSG00000026395	7.35015	10.1542	1381	1398	0.686	0.733	0.466235	2.74e-12	8.36e-08	up	Ptprc
macrophages	ENSMUSG00000021322	4.91399	6.78615	1381	1398	0.502	0.581	0.465699	1.12e-07	0.00341539	up	Aoah
macrophages	ENSMUSG00000031453	1.02826	1.4199	1381	1398	0.182	0.265	0.465586	2.38e-08	0.00072423	up	Rasa3
macrophages	ENSMUSG00000037902	2.25762	3.1142	1381	1398	0.344	0.446	0.464058	2.82e-07	0.00858345	up	Sirpa
macrophages	ENSMUSG00000038301	0.857248	1.18014	1381	1398	0.148	0.217	0.461167	2.1e-07	0.00639651	up	Snx10
macrophages	ENSMUSG00000061313	0.866305	1.1903	1381	1398	0.159	0.232	0.458375	4.26e-07	0.0129943	up	Ddhd2
macrophages	ENSMUSG00000022148	6.55587	9.00319	1381	1398	0.61	0.7	0.457648	5.99e-10	1.83e-05	up	Fyb
macrophages	ENSMUSG00000021408	0.729907	0.999983	1381	1398	0.131	0.201	0.454191	8.16e-08	0.00248706	up	Ripk1
macrophages	ENSMUSG00000055435	6.72299	9.20482	1381	1398	0.618	0.692	0.453286	9.62e-13	2.93e-08	up	Maf
macrophages	ENSMUSG00000034342	2.05712	2.8164	1381	1398	0.319	0.44	0.453228	5.19e-11	1.58e-06	up	Cbl
macrophages	ENSMUSG00000029176	0.472041	0.64553	1381	1398	0.085	0.135	0.451573	2.72e-07	0.00828608	up	Anapc4
macrophages	ENSMUSG00000026425	6.62093	9.04078	1381	1398	0.659	0.727	0.449413	3.09e-11	9.43e-07	up	Srgap2
macrophages	ENSMUSG00000036894	0.337836	0.460917	1381	1398	0.06	0.102	0.448186	3.44e-07	0.0104842	up	Rap2b
macrophages	ENSMUSG00000026289	0.652478	0.88917	1381	1398	0.118	0.192	0.446531	2.74e-12	8.34e-08	up	Atg16l1
macrophages	ENSMUSG00000001750	0.555276	0.756135	1381	1398	0.099	0.158	0.445439	2.63e-08	0.000802289	up	Tcirg1
macrophages	ENSMUSG00000064145	0.780384	1.06128	1381	1398	0.145	0.219	0.443552	2.54e-08	0.000775357	up	Arih2
macrophages	ENSMUSG00000030263	0.908297	1.23262	1381	1398	0.155	0.236	0.440493	5.41e-10	1.65e-05	up	Lrmp
macrophages	ENSMUSG00000045817	1.83911	2.49535	1381	1398	0.298	0.396	0.440231	2.69e-07	0.00818935	up	Zfp36l2
macrophages	ENSMUSG00000023026	3.08615	4.18464	1381	1398	0.424	0.534	0.439295	3.89e-08	0.0011855	up	Dip2b
macrophages	ENSMUSG00000034290	0.543077	0.73622	1381	1398	0.104	0.158	0.43898	6.75e-07	0.0205701	up	Nek9
macrophages	ENSMUSG00000035762	0.577213	0.781127	1381	1398	0.107	0.162	0.436453	1.43e-06	0.0435543	up	Tmem161b
macrophages	ENSMUSG00000031278	0.808991	1.09432	1381	1398	0.14	0.206	0.435843	1.3e-06	0.0397338	up	Acsl4
macrophages	ENSMUSG00000026219	2.16562	2.9288	1381	1398	0.34	0.459	0.435527	1.47e-10	4.47e-06	up	Trip12
macrophages	ENSMUSG00000071669	3.3284	4.50008	1381	1398	0.436	0.536	0.435122	3.03e-07	0.00922279	up	Snx29
macrophages	ENSMUSG00000027615	1.41939	1.91769	1381	1398	0.239	0.335	0.434095	9.17e-09	0.000279572	up	Hps3
macrophages	ENSMUSG00000032582	2.06554	2.7884	1381	1398	0.327	0.448	0.432921	9.56e-11	2.91e-06	up	Rbm6
macrophages	ENSMUSG00000033790	0.825397	1.11384	1381	1398	0.146	0.212	0.432382	3.21e-07	0.00977496	up	Tubgcp5
macrophages	ENSMUSG00000046207	0.917002	1.23705	1381	1398	0.162	0.235	0.431907	6.55e-08	0.00199698	up	Pik3r6
macrophages	ENSMUSG00000028053	2.85526	3.85128	1381	1398	0.403	0.534	0.431716	1.79e-11	5.44e-07	up	Ash1l
macrophages	ENSMUSG00000034947	1.12658	1.51897	1381	1398	0.19	0.292	0.431145	1.13e-13	3.45e-09	up	Tmem106a
macrophages	ENSMUSG00000035798	0.576619	0.774856	1381	1398	0.109	0.162	0.426309	6.53e-07	0.0198966	up	Zdhhc17
macrophages	ENSMUSG00000036792	2.138	2.87297	1381	1398	0.314	0.426	0.426281	2.81e-09	8.56e-05	up	Mbd5
macrophages	ENSMUSG00000024300	3.70104	4.96543	1381	1398	0.461	0.573	0.423988	1.81e-08	0.000551452	up	Myo1f
macrophages	ENSMUSG00000038766	0.641426	0.860344	1381	1398	0.119	0.175	0.42363	5.16e-07	0.0157366	up	Gabpb2
macrophages	ENSMUSG00000028163	2.18322	2.92681	1381	1398	0.336	0.437	0.422867	1.57e-07	0.00478303	up	Nfkb1
macrophages	ENSMUSG00000034187	1.17934	1.57977	1381	1398	0.203	0.29	0.421733	1.93e-09	5.9e-05	up	Nsf
macrophages	ENSMUSG00000048234	0.883737	1.18343	1381	1398	0.159	0.232	0.421287	1.12e-07	0.00341036	up	Rnf149
macrophages	ENSMUSG00000075284	3.28559	4.39757	1381	1398	0.435	0.543	0.420555	9.49e-08	0.00289116	up	Wipf1
macrophages	ENSMUSG00000020166	1.28958	1.72531	1381	1398	0.232	0.322	0.419951	5.05e-08	0.0015404	up	Cnot2
macrophages	ENSMUSG00000059182	4.02255	5.37906	1381	1398	0.502	0.619	0.419243	8.74e-10	2.66e-05	up	Skap2
macrophages	ENSMUSG00000020903	1.12882	1.50877	1381	1398	0.188	0.263	0.418556	6.06e-07	0.0184657	up	Stx8
macrophages	ENSMUSG00000064090	2.27262	3.03342	1381	1398	0.324	0.428	0.416592	7.14e-08	0.00217473	up	Vrk2
macrophages	ENSMUSG00000017291	1.98397	2.64005	1381	1398	0.322	0.432	0.412172	2.47e-09	7.54e-05	up	Taok1
macrophages	ENSMUSG00000039753	0.94073	1.24933	1381	1398	0.172	0.244	0.409299	1.31e-07	0.00398293	up	Fbxl5
macrophages	ENSMUSG00000022973	2.31237	3.06791	1381	1398	0.35	0.449	0.407884	5.26e-07	0.0160285	up	Synj1
macrophages	ENSMUSG00000062127	1.4492	1.92119	1381	1398	0.229	0.323	0.406736	3.36e-09	0.000102466	up	Cttnbp2nl
macrophages	ENSMUSG00000026712	21.8785	28.9465	1381	1398	0.886	0.848	0.403877	1.07e-28	3.25e-24	up	Mrc1
macrophages	ENSMUSG00000054640	10.9773	14.4984	1381	1398	0.727	0.779	0.401366	1.47e-10	4.49e-06	up	Slc8a1
macrophages	ENSMUSG00000035392	7.76836	10.2559	1381	1398	0.705	0.762	0.400777	7.32e-13	2.23e-08	up	Dennd1a
macrophages	ENSMUSG00000032336	2.06724	2.7273	1381	1398	0.327	0.431	0.399768	6.96e-08	0.00212191	up	Nptn
macrophages	ENSMUSG00000025630	0.592554	0.7817	1381	1398	0.108	0.164	0.399668	1.44e-06	0.043765	up	Hprt
macrophages	ENSMUSG00000021108	1.42786	1.87972	1381	1398	0.223	0.322	0.396668	1.32e-11	4.01e-07	up	Prkch
macrophages	ENSMUSG00000032405	3.14152	4.13364	1381	1398	0.436	0.56	0.395951	2.79e-10	8.5e-06	up	Pias1
macrophages	ENSMUSG00000027194	1.18959	1.56496	1381	1398	0.198	0.273	0.395659	2.7e-07	0.00823688	up	Ttc17
macrophages	ENSMUSG00000041920	0.6511	0.855814	1381	1398	0.115	0.171	0.394418	1.19e-06	0.0362165	up	Slc16a6
macrophages	ENSMUSG00000037174	2.02734	2.66248	1381	1398	0.32	0.428	0.393182	2.12e-09	6.45e-05	up	Elf2
macrophages	ENSMUSG00000028760	2.32597	3.05262	1381	1398	0.351	0.459	0.392219	2.84e-08	0.00086595	up	Eif4g3
macrophages	ENSMUSG00000022781	2.28263	2.99418	1381	1398	0.35	0.475	0.391464	1.34e-11	4.08e-07	up	Pak2
macrophages	ENSMUSG00000050567	0.479421	0.62885	1381	1398	0.083	0.129	0.391423	6.86e-07	0.0209038	up	Maml1
macrophages	ENSMUSG00000031827	0.807234	1.0584	1381	1398	0.142	0.205	0.390832	3.07e-07	0.00934986	up	Cotl1
macrophages	ENSMUSG00000032504	1.03078	1.35147	1381	1398	0.181	0.262	0.390798	7.54e-10	2.3e-05	up	Pdcd6ip
macrophages	ENSMUSG00000040943	0.947467	1.24081	1381	1398	0.172	0.243	0.389141	1.38e-07	0.00420306	up	Tet2
macrophages	ENSMUSG00000018160	0.495002	0.648172	1381	1398	0.083	0.135	0.388942	6.84e-09	0.000208441	up	Med1
macrophages	ENSMUSG00000039697	1.47997	1.93435	1381	1398	0.236	0.324	0.386281	1.14e-07	0.00346974	up	Ncoa7
macrophages	ENSMUSG00000025810	6.10448	7.97834	1381	1398	0.601	0.665	0.38622	1.13e-06	0.034373	up	Nrp1
macrophages	ENSMUSG00000024308	0.865807	1.13135	1381	1398	0.161	0.236	0.385927	3.55e-08	0.0010822	up	Tapbp
macrophages	ENSMUSG00000039219	1.60912	2.09947	1381	1398	0.261	0.355	0.383753	1.87e-08	0.000569916	up	Arid4b
macrophages	ENSMUSG00000031309	2.47689	3.22852	1381	1398	0.343	0.448	0.382341	5.25e-08	0.00160098	up	Rps6ka3
macrophages	ENSMUSG00000031207	1.8407	2.39885	1381	1398	0.295	0.382	0.382086	1.5e-06	0.0458101	up	Msn
macrophages	ENSMUSG00000035597	0.996578	1.29738	1381	1398	0.175	0.251	0.380551	7.25e-09	0.000221077	up	Prpf39
macrophages	ENSMUSG00000030660	1.77856	2.315	1381	1398	0.282	0.381	0.380303	1.04e-08	0.000317766	up	Pik3c2a
macrophages	ENSMUSG00000043940	4.41146	5.74076	1381	1398	0.538	0.627	0.379986	9.51e-07	0.0289915	up	Wdfy3
macrophages	ENSMUSG00000005583	9.07189	11.8046	1381	1398	0.728	0.783	0.379874	8.58e-10	2.61e-05	up	Mef2c
macrophages	ENSMUSG00000055541	1.63652	2.12725	1381	1398	0.245	0.338	0.378363	2.53e-08	0.000770404	up	Lair1
macrophages	ENSMUSG00000039515	0.461795	0.600196	1381	1398	0.091	0.137	0.378181	1.29e-07	0.00392245	up	Ptpa
macrophages	ENSMUSG00000020422	1.47982	1.91753	1381	1398	0.232	0.328	0.37382	1.55e-09	4.71e-05	up	Tns3
macrophages	ENSMUSG00000040565	1.59157	2.06096	1381	1398	0.265	0.356	0.372868	2.61e-07	0.0079421	up	Btaf1
macrophages	ENSMUSG00000091896	1.10814	1.43489	1381	1398	0.201	0.28	0.372793	9.11e-09	0.000277595	up	Ube2d2a
macrophages	ENSMUSG00000000787	0.704953	0.9118	1381	1398	0.126	0.187	0.37119	8.4e-08	0.00256048	up	Ddx3x
macrophages	ENSMUSG00000029169	1.0526	1.36049	1381	1398	0.185	0.26	0.370173	5.36e-08	0.00163387	up	Dhx15
macrophages	ENSMUSG00000016087	6.5286	8.43582	1381	1398	0.641	0.721	0.369755	1.04e-09	3.18e-05	up	Fli1
macrophages	ENSMUSG00000028550	0.510933	0.659447	1381	1398	0.096	0.144	0.368123	7.2e-07	0.021941	up	Atg4c
macrophages	ENSMUSG00000057110	0.904633	1.1674	1381	1398	0.165	0.23	0.367892	8.68e-07	0.0264646	up	Cntrl
[truncated: 120 more rows]
