# Supplementary material for: Single-cell RNA-seq of heart reveals intercellular communication drivers of myocardial fibrosis in diabetic cardiomyopathy
Source: eLife. 2023 Apr 3;12:e80479. doi: 10.7554/eLife.80479 (PMC10110238; doi:10.7554/eLife.80479)
Supplement: Supplementary file 5. [file elife-80479-supp5.xls]

Supplementary file 5: Significantly differentially-expressed genes in specific cell populations relative to others in mice hearts
Target_Cluster	Gene ID	Gene Name	Target_Cluster_mean	Other_Cluster_mean	Log2FC	Pvalue	Qvalue
Adipocytes	ENSMUSG00000041737	Tmem45b	4.222869719	0.002159045	10.9336147	0	0
Adipocytes	ENSMUSG00000020963	Tshr	5.350413495	0.003341351	10.64500315	0	0
Adipocytes	ENSMUSG00000030546	Plin1	10.48314705	0.007990419	10.35751313	0	0
Adipocytes	ENSMUSG00000031489	Adrb3	2.550201217	0.002065635	10.26980988	0	0
Adipocytes	ENSMUSG00000110843	Gm35552	1.222573279	0.00106659	10.16269941	0	0
Adipocytes	ENSMUSG00000027513	Pck1	9.289172796	0.009273004	9.968297678	0	0
Adipocytes	ENSMUSG00000027559	Car3	41.36999698	0.042904583	9.913237368	0	0
Adipocytes	ENSMUSG00000024972	Lgals12	1.733041606	0.001868076	9.857537748	0	0
Adipocytes	ENSMUSG00000022878	Adipoq	4.611063699	0.00525517	9.777146473	0	0
Adipocytes	ENSMUSG00000030278	Cidec	6.888561506	0.008390473	9.68123482	0	0
Adipocytes	ENSMUSG00000074771	Ankef1	4.693343061	0.006025296	9.605368104	0	0
Adipocytes	ENSMUSG00000106871	Gm3289	1.592105661	0.002202049	9.497873583	0	0
Adipocytes	ENSMUSG00000110613	Lncbate1	1.946803297	0.00294831	9.367003239	0	0
Adipocytes	ENSMUSG00000026834	Acvr1c	6.115947544	0.009369736	9.350351909	0	0
Adipocytes	ENSMUSG00000061780	Cfd	32.03204137	0.04931849	9.343171411	0	0
Adipocytes	ENSMUSG00000087382	Ctcflos	3.213977145	0.00512911	9.291435356	0	0
Adipocytes	ENSMUSG00000041653	Pnpla3	7.304465952	0.013444985	9.085566875	0	0
Adipocytes	ENSMUSG00000012705	Retn	3.778218273	0.007977698	8.887517752	0	0
Adipocytes	ENSMUSG00000033576	Apol6	2.589003768	0.005656612	8.838243187	0	0
Adipocytes	ENSMUSG00000031722	Hp	14.86995277	0.052951965	8.133500136	0	0
Adipocytes	ENSMUSG00000025479	Cyp2e1	5.789021511	0.022479489	8.008566477	0	0
Adipocytes	ENSMUSG00000008153	Clstn3	1.067443041	0.004269054	7.966026912	0	0
Adipocytes	ENSMUSG00000040016	Ptger3	1.96374201	0.009063413	7.759335272	0	0
Adipocytes	ENSMUSG00000033022	Cdo1	6.63807277	0.045951169	7.174519058	0	0
Adipocytes	ENSMUSG00000048078	Tenm4	5.308012551	0.036895394	7.168587269	1.96E-305	5.97E-301
Adipocytes	ENSMUSG00000057715	A830018L16Rik	2.191260879	0.013134544	7.38225129	5.23E-246	1.59E-241
Adipocytes	ENSMUSG00000044405	Adig	1.21438732	0.012526962	6.599048233	1.96E-239	5.97E-235
Adipocytes	ENSMUSG00000031710	Ucp1	3.778780779	0.015508026	7.928761941	5.96E-227	1.82E-222
Adipocytes	ENSMUSG00000020264	Slc36a2	7.238189213	0.058398962	6.95354228	4.40E-195	1.34E-190
Adipocytes	ENSMUSG00000023019	Gpd1	5.340922794	0.073214847	6.188808977	1.30E-194	3.96E-190
Adipocytes	ENSMUSG00000055254	Ntrk2	2.665387025	0.038207131	6.124359293	1.24E-186	3.78E-182
Adipocytes	ENSMUSG00000089941	Gm16168	1.73456006	0.038852663	5.480412484	2.37E-147	7.22E-143
Adipocytes	ENSMUSG00000002997	Prkar2b	9.275441732	0.138565493	6.064776057	3.55E-146	1.08E-141
Adipocytes	ENSMUSG00000001348	Acp5	1.147070885	0.028211954	5.345504167	2.51E-141	7.64E-137
Adipocytes	ENSMUSG00000024892	Pcx	5.582311114	0.084465468	6.04635708	3.49E-133	1.07E-128
Adipocytes	ENSMUSG00000005373	Mlxipl	4.068200933	0.090530004	5.489851103	5.47E-133	1.67E-128
Adipocytes	ENSMUSG00000037071	Scd1	10.63373915	0.145232896	6.194136906	2.27E-129	6.93E-125
Adipocytes	ENSMUSG00000097124	A530020G20Rik	1.396827657	0.021068718	6.050907707	7.51E-126	2.29E-121
Adipocytes	ENSMUSG00000032311	Nrg4	4.214581102	0.067459338	5.965227279	2.80E-110	8.54E-106
Adipocytes	ENSMUSG00000028076	Cd1d1	1.840492651	0.033883081	5.763383123	3.63E-106	1.11E-101
Adipocytes	ENSMUSG00000025153	Fasn	5.290320271	0.056595113	6.546533777	1.52E-97	4.64E-93
Adipocytes	ENSMUSG00000059146	Ntrk3	7.508961795	0.114397595	6.036484825	1.28E-85	3.91E-81
Adipocytes	ENSMUSG00000046275	Trarg1	1.486941187	0.066689245	4.478749662	9.24E-83	2.82E-78
Adipocytes	ENSMUSG00000021069	Pygl	2.124650223	0.064609712	5.039330509	6.16E-81	1.88E-76
Adipocytes	ENSMUSG00000026527	Rgs7	8.339177595	0.185908144	5.48724324	1.93E-75	5.89E-71
Adipocytes	ENSMUSG00000108141	Gm44079	5.975103373	0.146813279	5.346909303	3.51E-71	1.07E-66
Adipocytes	ENSMUSG00000005057	Sh2b2	1.097068538	0.036543687	4.907887646	2.14E-64	6.53E-60
Adipocytes	ENSMUSG00000035686	Thrsp	10.1842385	0.263625701	5.271703272	2.44E-64	7.43E-60
Adipocytes	ENSMUSG00000026922	Agpat2	4.199628231	0.200355207	4.389629709	4.82E-59	1.47E-54
Adipocytes	ENSMUSG00000092323	BB365896	3.061699678	0.058997229	5.697541763	6.33E-55	1.93E-50
Adipocytes	ENSMUSG00000038267	Slc22a23	3.026589346	0.113100668	4.74201358	8.03E-52	2.45E-47
Adipocytes	ENSMUSG00000118099	Gm31356	6.087987857	0.164848119	5.206756148	1.09E-50	3.31E-46
Adipocytes	ENSMUSG00000037196	Pacrg	2.328662888	0.092530569	4.653427929	1.38E-50	4.21E-46
Adipocytes	ENSMUSG00000005360	Slc1a3	7.465168752	0.194287746	5.26390806	5.20E-50	1.58E-45
Adipocytes	ENSMUSG00000002831	Plin4	3.868560302	0.277908281	3.799116034	1.64E-47	4.99E-43
Adipocytes	ENSMUSG00000039956	Mrap	2.456488793	0.107734478	4.511045731	3.46E-47	1.06E-42
Adipocytes	ENSMUSG00000029482	Aacs	1.903800498	0.060379966	4.978668552	2.05E-46	6.24E-42
Adipocytes	ENSMUSG00000021792	Prxl2a	2.199159831	0.151852047	3.856214203	1.34E-45	4.09E-41
Adipocytes	ENSMUSG00000024526	Cidea	6.993445195	0.215079659	5.023060355	4.09E-44	1.25E-39
Adipocytes	ENSMUSG00000111757	Gm46124	1.481197373	0.09083482	4.027374655	2.03E-42	6.18E-38
Adipocytes	ENSMUSG00000003123	Lipe	7.366595333	0.517025346	3.832691082	2.38E-41	7.24E-37
Adipocytes	ENSMUSG00000035376	Hacd2	4.83070201	0.394843645	3.612879485	1.71E-40	5.20E-36
Adipocytes	ENSMUSG00000054434	Tmem120b	2.416318467	0.159498091	3.921199549	3.54E-40	1.08E-35
Adipocytes	ENSMUSG00000063873	Slc24a3	8.12181157	0.690230809	3.556650781	6.58E-39	2.00E-34
Adipocytes	ENSMUSG00000002020	Ltbp2	1.006095771	0.094015172	3.419730238	1.14E-38	3.47E-34
Adipocytes	ENSMUSG00000030747	Dgat2	7.572882767	0.597828924	3.66303799	3.38E-38	1.03E-33
Adipocytes	ENSMUSG00000026773	Pfkfb3	3.866144888	0.292511533	3.724330291	5.61E-38	1.71E-33
Adipocytes	ENSMUSG00000003865	Gys1	2.705816447	0.282342264	3.260546967	1.10E-37	3.35E-33
Adipocytes	ENSMUSG00000057265	Bbof1	1.856056454	0.110812288	4.066050813	3.48E-36	1.06E-31
Adipocytes	ENSMUSG00000020532	Acaca	21.96424345	0.545035438	5.332662962	1.88E-35	5.72E-31
Adipocytes	ENSMUSG00000054555	Adam12	3.77329148	0.220547678	4.096661077	3.27E-33	9.95E-29
Adipocytes	ENSMUSG00000061816	Myl1	1.982754319	0.178201007	3.475928529	3.47E-32	1.06E-27
Adipocytes	ENSMUSG00000030545	Pex11a	1.259317701	0.093434724	3.752539674	3.89E-31	1.19E-26
Adipocytes	ENSMUSG00000022555	Dgat1	1.919541837	0.178689253	3.425237233	8.59E-31	2.62E-26
Adipocytes	ENSMUSG00000030671	Pde3b	10.12921196	0.746640381	3.761964591	2.44E-30	7.44E-26
Adipocytes	ENSMUSG00000020089	Ppa1	2.493869821	0.226778633	3.459029537	2.52E-30	7.68E-26
Adipocytes	ENSMUSG00000020538	Srebf1	2.126766778	0.206265966	3.366084137	3.58E-30	1.09E-25
Adipocytes	ENSMUSG00000021215	Net1	1.866042077	0.132295818	3.81814216	7.67E-29	2.34E-24
Adipocytes	ENSMUSG00000021957	Tkt	4.035866301	0.359807464	3.48758136	9.01E-29	2.75E-24
Adipocytes	ENSMUSG00000026858	Miga2	2.943423668	0.317448334	3.212901502	1.85E-28	5.65E-24
Adipocytes	ENSMUSG00000087475	4933406I18Rik	6.913222444	0.429412664	4.008921703	5.96E-28	1.82E-23
Adipocytes	ENSMUSG00000062209	Erbb4	8.965941032	1.581654754	2.503020291	8.99E-28	2.74E-23
Adipocytes	ENSMUSG00000041220	Elovl6	1.771563539	0.113766035	3.960881405	2.78E-27	8.47E-23
Adipocytes	ENSMUSG00000037709	Fam13a	9.234678443	0.377887843	4.611031714	9.08E-27	2.77E-22
Adipocytes	ENSMUSG00000042249	Grk3	1.402949352	0.208340767	2.751445856	7.32E-26	2.23E-21
Adipocytes	ENSMUSG00000018796	Acsl1	25.68758862	1.723238755	3.89787696	9.01E-26	2.75E-21
Adipocytes	ENSMUSG00000038174	Fam126b	4.363388876	0.419928259	3.377234274	2.44E-25	7.43E-21
Adipocytes	ENSMUSG00000020744	Slc25a19	1.509891519	0.115177357	3.712515871	4.59E-25	1.40E-20
Adipocytes	ENSMUSG00000019326	Aoc3	1.317426603	0.173728073	2.922819779	5.34E-25	1.63E-20
Adipocytes	ENSMUSG00000001918	Slc1a5	13.29920338	0.933171986	3.833053023	8.01E-25	2.44E-20
Adipocytes	ENSMUSG00000020085	Aifm2	1.134786709	0.113004767	3.327965616	9.72E-25	2.96E-20
Adipocytes	ENSMUSG00000038150	Ormdl3	3.274549373	0.307081175	3.414604404	1.86E-24	5.67E-20
Adipocytes	ENSMUSG00000021033	Gstz1	2.107256006	0.286704058	2.877731367	2.94E-24	8.97E-20
Adipocytes	ENSMUSG00000053714	4732471J01Rik	4.430423342	0.49108234	3.173407713	7.36E-24	2.24E-19
Adipocytes	ENSMUSG00000030168	Adipor2	15.36143094	1.194139083	3.685269827	8.97E-24	2.73E-19
Adipocytes	ENSMUSG00000060002	Chpt1	10.68488493	2.035003238	2.392468376	1.38E-23	4.19E-19
Adipocytes	ENSMUSG00000039886	Tmem120a	1.123780881	0.146122194	2.943113535	1.42E-23	4.33E-19
Adipocytes	ENSMUSG00000000440	Pparg	14.96653424	1.518302413	3.301209101	3.59E-23	1.10E-18
Adipocytes	ENSMUSG00000068747	Sort1	1.498096707	0.249539315	2.585791721	1.71E-22	5.21E-18
Adipocytes	ENSMUSG00000035948	Acss3	3.651919825	0.418708918	3.124635541	3.01E-22	9.17E-18
Adipocytes	ENSMUSG00000042010	Acacb	6.592317189	0.94737053	2.79878496	3.34E-21	1.02E-16
Adipocytes	ENSMUSG00000046794	Ppp1r3b	1.346159458	0.112163357	3.58517598	6.50E-21	1.98E-16
Adipocytes	ENSMUSG00000028973	Abcb8	1.160254833	0.13468404	3.106790904	8.28E-21	2.52E-16
Adipocytes	ENSMUSG00000037095	Lrg1	2.022408978	0.208943411	3.274890602	1.30E-20	3.95E-16
Adipocytes	ENSMUSG00000055782	Abcd2	0.995869406	0.117306773	3.085670255	3.26E-20	9.94E-16
Adipocytes	ENSMUSG00000060429	Sntb1	2.989969419	0.371841012	3.007372923	4.80E-20	1.46E-15
Adipocytes	ENSMUSG00000037112	Sik2	12.40505199	1.099290268	3.496283497	7.94E-20	2.42E-15
Adipocytes	ENSMUSG00000027605	Acss2	6.683364659	0.334144114	4.322032229	9.47E-20	2.89E-15
Adipocytes	ENSMUSG00000032786	Alas1	3.210860228	0.535887156	2.582958721	1.07E-19	3.25E-15
Adipocytes	ENSMUSG00000009633	G0s2	13.88808047	2.135597004	2.701135877	2.53E-19	7.71E-15
Adipocytes	ENSMUSG00000031808	Slc27a1	2.784036269	0.452181385	2.6222045	4.73E-19	1.44E-14
Adipocytes	ENSMUSG00000070780	Rbm47	3.10217763	0.440661691	2.815537912	1.28E-18	3.89E-14
Adipocytes	ENSMUSG00000020917	Acly	3.109732664	0.312301374	3.315779738	6.23E-18	1.90E-13
Adipocytes	ENSMUSG00000056973	Ces1d	3.327769495	0.610288052	2.446993254	1.38E-17	4.21E-13
Adipocytes	ENSMUSG00000026626	Ppp2r5a	10.40578977	1.636483741	2.668715292	1.81E-17	5.51E-13
Adipocytes	ENSMUSG00000053617	Sh3pxd2a	5.207466527	0.930076643	2.48516015	2.31E-17	7.05E-13
Adipocytes	ENSMUSG00000032263	Bckdhb	2.259036305	0.465043188	2.280270846	3.30E-17	1.00E-12
Adipocytes	ENSMUSG00000021779	Thrb	6.243163669	1.513256255	2.044620973	3.32E-17	1.01E-12
Adipocytes	ENSMUSG00000002346	Slc25a42	2.922869244	0.240645258	3.602405391	4.08E-17	1.24E-12
Adipocytes	ENSMUSG00000021136	Smoc1	2.730116922	0.504161085	2.437006069	5.91E-17	1.80E-12
Adipocytes	ENSMUSG00000027195	Hsd17b12	4.019454012	0.492990631	3.027367411	1.20E-16	3.65E-12
Adipocytes	ENSMUSG00000026107	Nabp1	1.374140758	0.1448709	3.24569006	2.00E-16	6.10E-12
Adipocytes	ENSMUSG00000092356	Gm20532	2.735978122	0.31922405	3.09941544	4.28E-16	1.31E-11
Adipocytes	ENSMUSG00000020593	Lpin1	3.051904962	0.544240993	2.487392505	6.12E-16	1.87E-11
Adipocytes	ENSMUSG00000033096	Apmap	1.978735953	0.245666334	3.009807038	1.58E-15	4.82E-11
Adipocytes	ENSMUSG00000023044	Csad	3.227390339	0.411461118	2.971540065	3.15E-15	9.60E-11
Adipocytes	ENSMUSG00000032540	Abhd5	1.789941077	0.221943899	3.011645137	3.27E-15	9.97E-11
Adipocytes	ENSMUSG00000023951	Vegfa	4.118437469	1.021281096	2.011717078	3.57E-15	1.09E-10
Adipocytes	ENSMUSG00000025551	Fgf14	6.674838426	1.228384693	2.441970475	4.44E-15	1.35E-10
Adipocytes	ENSMUSG00000031984	2810004N23Rik	3.631466622	0.650432109	2.481081937	5.19E-15	1.58E-10
Adipocytes	ENSMUSG00000025059	Gk	3.406921816	0.291450943	3.547143866	7.78E-15	2.37E-10
Adipocytes	ENSMUSG00000041625	Ggact	3.568413278	0.575586099	2.632179057	1.03E-14	3.14E-10
Adipocytes	ENSMUSG00000019883	Echdc1	2.679965604	0.440565561	2.604785857	1.25E-14	3.80E-10
Adipocytes	ENSMUSG00000039410	Prdm16	2.193170354	0.441494764	2.312549646	1.48E-14	4.51E-10
Adipocytes	ENSMUSG00000022840	Adcy5	1.644087831	0.216795394	2.922881364	1.54E-14	4.69E-10
Adipocytes	ENSMUSG00000021646	Mccc2	1.125051027	0.225467667	2.318997971	3.58E-14	1.09E-09
Adipocytes	ENSMUSG00000037573	Tob1	1.642370268	0.275955605	2.573271324	5.76E-14	1.76E-09
Adipocytes	ENSMUSG00000092399	4930556N13Rik	2.497248631	0.165343736	3.91679917	8.48E-14	2.58E-09
Adipocytes	ENSMUSG00000114504	Gm48321	1.641640113	0.276361429	2.570509709	1.22E-13	3.72E-09
Adipocytes	ENSMUSG00000022383	Ppara	6.141978796	0.428567606	3.841108822	1.31E-13	4.01E-09
Adipocytes	ENSMUSG00000064105	Cnnm2	1.617274487	0.261796723	2.627045611	2.37E-13	7.21E-09
Adipocytes	ENSMUSG00000033720	Sfxn5	1.063977274	0.171234259	2.635424058	2.56E-13	7.81E-09
Adipocytes	ENSMUSG00000038301	Snx10	2.58950915	0.430762871	2.587712847	2.61E-13	7.95E-09
Adipocytes	ENSMUSG00000045875	Adra1a	2.736618457	0.283469351	3.271129643	2.81E-13	8.56E-09
Adipocytes	ENSMUSG00000003948	Mmd	1.889119843	0.321436187	2.555109967	8.82E-13	2.69E-08
Adipocytes	ENSMUSG00000038344	Txlng	2.970270802	0.543425751	2.450439632	9.12E-13	2.78E-08
Adipocytes	ENSMUSG00000008540	Mgst1	8.507366418	1.703552227	2.320166416	1.01E-12	3.07E-08
Adipocytes	ENSMUSG00000057614	Gnai1	1.507187917	0.261749615	2.525599983	1.16E-12	3.52E-08
Adipocytes	ENSMUSG00000020253	Ppm1m	0.906410408	0.170579743	2.409718097	1.24E-12	3.77E-08
Adipocytes	ENSMUSG00000025509	Pnpla2	3.03256641	0.730470472	2.053641378	1.51E-12	4.59E-08
Adipocytes	ENSMUSG00000056899	Immp2l	13.10394961	2.519531405	2.37877437	1.74E-12	5.29E-08
Adipocytes	ENSMUSG00000027217	Tspan18	3.74383052	0.724662809	2.369133367	2.36E-12	7.19E-08
Adipocytes	ENSMUSG00000020283	Pex13	2.589303358	0.488805212	2.405232425	3.06E-12	9.34E-08
Adipocytes	ENSMUSG00000055737	Ghr	62.66414045	5.718567006	3.453914519	3.16E-12	9.63E-08
Adipocytes	ENSMUSG00000000628	Hk2	3.809574105	0.755971998	2.333225018	6.85E-12	2.09E-07
Adipocytes	ENSMUSG00000064215	Ifi27	3.764394634	0.790669658	2.251270912	1.22E-11	3.72E-07
Adipocytes	ENSMUSG00000037110	Ralgapa2	10.92478515	2.591175684	2.075926167	1.43E-11	4.37E-07
Adipocytes	ENSMUSG00000033871	Ppargc1b	5.093374094	0.640031228	2.992407479	2.39E-11	7.27E-07
Adipocytes	ENSMUSG00000026827	Gpd2	1.227607372	0.294495163	2.059533371	3.53E-11	1.08E-06
Adipocytes	ENSMUSG00000026384	Ptpn4	4.148215658	0.926271604	2.162983707	4.29E-11	1.31E-06
Adipocytes	ENSMUSG00000041801	Phlda3	1.085479877	0.204798645	2.406054905	4.33E-11	1.32E-06
Adipocytes	ENSMUSG00000033526	Ppip5k1	2.096012633	0.401174609	2.385345207	5.90E-11	1.80E-06
Adipocytes	ENSMUSG00000041417	Pik3r1	10.53125338	1.82592589	2.527977034	6.83E-11	2.08E-06
Adipocytes	ENSMUSG00000048787	Dcun1d3	2.20130162	0.422462315	2.381462275	8.91E-11	2.72E-06
Adipocytes	ENSMUSG00000024978	Gpam	3.370667382	0.587833131	2.519555689	1.00E-10	3.06E-06
Adipocytes	ENSMUSG00000021238	Aldh6a1	1.798505455	0.423354169	2.086861535	1.38E-10	4.20E-06
Adipocytes	ENSMUSG00000023087	Noct	1.470295495	0.228808217	2.683895364	1.73E-10	5.27E-06
Adipocytes	ENSMUSG00000022707	Gbe1	3.003306307	0.686857252	2.128469419	1.85E-10	5.63E-06
Adipocytes	ENSMUSG00000078566	Bnip3	2.843160322	0.619400015	2.19855213	2.12E-10	6.47E-06
Adipocytes	ENSMUSG00000009112	Bcl2l13	1.645842353	0.358381397	2.199258496	2.17E-10	6.62E-06
Adipocytes	ENSMUSG00000028944	Prkag2	3.519082779	0.875779347	2.006560118	2.45E-10	7.47E-06
Adipocytes	ENSMUSG00000005514	Por	3.204599861	0.663956368	2.270983885	3.36E-10	1.02E-05
Adipocytes	ENSMUSG00000033849	B3galt2	3.118881718	0.421924084	2.885973495	4.54E-10	1.38E-05
Adipocytes	ENSMUSG00000028405	Aco1	1.315934546	0.316579929	2.055446035	5.31E-10	1.62E-05
Adipocytes	ENSMUSG00000031605	Klhl2	2.783583377	0.558098393	2.318351899	6.57E-10	2.00E-05
Adipocytes	ENSMUSG00000051391	Ywhag	4.029067781	0.827737722	2.283200466	1.63E-09	4.97E-05
Adipocytes	ENSMUSG00000034858	Fam214a	2.86061555	0.567790267	2.332895597	6.27E-09	0.000191065
Adipocytes	ENSMUSG00000023079	Gtf2ird1	2.158937088	0.243039325	3.151059533	6.41E-09	0.000195361
Adipocytes	ENSMUSG00000018846	Pank3	1.535557529	0.307221149	2.321413122	1.54E-08	0.000470642
Adipocytes	ENSMUSG00000025503	Taldo1	1.83434892	0.444745092	2.044217497	1.65E-08	0.00050229
Adipocytes	ENSMUSG00000032578	Cish	1.212884568	0.259637123	2.223873672	2.86E-08	0.000870528
Adipocytes	ENSMUSG00000023206	Il15ra	2.249250967	0.447331478	2.330028457	5.15E-08	0.001570164
B_cell	ENSMUSG00000014030	Pax5	10.22884981	0.001863002	12.42272701	0	0
B_cell	ENSMUSG00000105646	Gm30211	37.7606479	0.011694672	11.65681646	0	0
B_cell	ENSMUSG00000104927	Gm43388	4.794359986	0.001585232	11.56242849	0	0
B_cell	ENSMUSG00000024673	Ms4a1	6.780413116	0.002244558	11.56072596	0	0
B_cell	ENSMUSG00000034634	Ly6d	9.21077906	0.003065868	11.55281205	0	0
B_cell	ENSMUSG00000042474	Fcmr	4.453296372	0.001636162	11.41034229	0	0
B_cell	ENSMUSG00000003379	Cd79a	13.71211972	0.00511916	11.38725699	0	0
B_cell	ENSMUSG00000032053	Pou2af1	2.600000694	0.001654759	10.61767526	0	0
B_cell	ENSMUSG00000059994	Fcrl1	1.854915597	0.001492507	10.27939967	0	0
B_cell	ENSMUSG00000030577	Cd22	2.852167128	0.002488829	10.16237563	0	0
B_cell	ENSMUSG00000114794	Gm47782	3.493849014	0.003376896	10.01490368	0	0
B_cell	ENSMUSG00000005540	Fcer2a	6.029463439	0.007439998	9.662511715	0	0
B_cell	ENSMUSG00000040592	Cd79b	8.308367461	0.012712583	9.35216398	0	0
B_cell	ENSMUSG00000030468	Siglecg	2.97228933	0.004897403	9.245341883	0	0
B_cell	ENSMUSG00000026581	Sell	4.398819197	0.010113673	8.764665422	0	0
B_cell	ENSMUSG00000026866	Kynu	3.373871641	0.00800571	8.71916006	0	0
B_cell	ENSMUSG00000052013	Btla	11.7719889	0.029271752	8.651633249	0	0
B_cell	ENSMUSG00000037548	H2-DMb2	2.163381812	0.005680051	8.573168727	0	0
B_cell	ENSMUSG00000047880	Cxcr5	2.332954692	0.007698978	8.243275663	0	0
B_cell	ENSMUSG00000041538	H2-Ob	5.599702023	0.018893056	8.211350137	0	0
B_cell	ENSMUSG00000050600	Zfp831	2.10306185	0.00810477	8.019504323	0	0
B_cell	ENSMUSG00000074071	Fam169b	1.867070835	0.008752807	7.736815122	0	0
B_cell	ENSMUSG00000022686	B3gnt5	2.719106792	0.012913239	7.718138122	0	0
B_cell	ENSMUSG00000018168	Ikzf3	9.570909417	0.046255754	7.692879377	0	0
B_cell	ENSMUSG00000015314	Slamf6	4.080064119	0.021404916	7.574505871	0	0
B_cell	ENSMUSG00000002204	Napsa	4.464563386	0.025403888	7.457325943	0	0
B_cell	ENSMUSG00000024399	Ltb	4.313673894	0.026497937	7.346893242	0	0
B_cell	ENSMUSG00000000248	Clec2g	5.375752721	0.034418252	7.287149153	0	0
B_cell	ENSMUSG00000000673	Haao	2.015983629	0.013128098	7.262682176	0	0
B_cell	ENSMUSG00000026347	Tmem163	12.67545635	0.087827718	7.173145656	0	0
B_cell	ENSMUSG00000014453	Blk	3.836213924	0.026745294	7.164254285	0	0
B_cell	ENSMUSG00000085786	Gm15987	6.502833091	0.050429472	7.010657451	0	0
B_cell	ENSMUSG00000062939	Stat4	6.476203293	0.053259972	6.925952796	0	0
B_cell	ENSMUSG00000036526	Card11	3.81283925	0.03272298	6.864417746	0	0
B_cell	ENSMUSG00000000861	Bcl11a	6.27442886	0.058992081	6.73281904	0	0
B_cell	ENSMUSG00000038421	Fcrla	2.030656446	0.0206859	6.617154632	0	0
B_cell	ENSMUSG00000037318	Traf3ip3	3.580835348	0.037943134	6.560313543	0	0
B_cell	ENSMUSG00000024675	Ms4a4c	3.36789177	0.039147119	6.426795831	0	0
B_cell	ENSMUSG00000045826	Ptprcap	4.016516681	0.052301269	6.262955101	0	0
B_cell	ENSMUSG00000042351	Grap2	3.28591397	0.060490044	5.763453183	1.54E-293	4.69E-289
B_cell	ENSMUSG00000037341	Slc9a7	5.147643269	0.053234736	6.59540035	1.10E-272	3.34E-268
B_cell	ENSMUSG00000057337	Chst3	2.794922679	0.02147389	7.024080976	3.76E-269	1.15E-264
B_cell	ENSMUSG00000034833	Tespa1	1.985046575	0.024559788	6.336730942	2.78E-239	8.47E-235
B_cell	ENSMUSG00000104710	Gm31243	24.28310129	0.362542536	6.065658605	3.27E-238	9.97E-234
B_cell	ENSMUSG00000004110	Cacna1e	3.988534486	0.039101727	6.672482603	1.66E-233	5.05E-229
B_cell	ENSMUSG00000030798	Cd37	9.539585826	0.168606601	5.822193704	1.93E-225	5.87E-221
B_cell	ENSMUSG00000039264	Gimap3	1.746620101	0.02932024	5.896525144	1.40E-205	4.25E-201
B_cell	ENSMUSG00000037922	Bank1	39.10278024	0.667399677	5.872576389	7.10E-203	2.17E-198
B_cell	ENSMUSG00000028033	Kcnq5	8.502098419	0.186871868	5.507697652	4.42E-184	1.35E-179
B_cell	ENSMUSG00000001348	Acp5	2.078848338	0.023865708	6.444701586	7.11E-181	2.17E-176
B_cell	ENSMUSG00000027347	Rasgrp1	1.715581109	0.03713731	5.529684191	8.02E-173	2.44E-168
B_cell	ENSMUSG00000026832	Cytip	3.070487359	0.061362806	5.644959398	4.57E-162	1.39E-157
B_cell	ENSMUSG00000010142	Tnfrsf13b	1.939192372	0.028392836	6.093785135	2.28E-141	6.95E-137
B_cell	ENSMUSG00000036006	Ripor2	18.54629998	0.527094536	5.136925849	1.10E-137	3.36E-133
B_cell	ENSMUSG00000026594	Ralgps2	15.35409966	0.407764611	5.234743537	1.38E-137	4.21E-133
B_cell	ENSMUSG00000000682	Cd52	8.64944694	0.326651733	4.726782689	3.25E-134	9.90E-130
B_cell	ENSMUSG00000084796	Mir142hg	8.765315014	0.363590377	4.59142002	7.48E-133	2.28E-128
B_cell	ENSMUSG00000029204	Rhoh	3.203930787	0.080431211	5.315943735	5.91E-132	1.80E-127
B_cell	ENSMUSG00000037138	Aff3	19.24977308	0.530366083	5.18170911	1.10E-131	3.35E-127
B_cell	ENSMUSG00000049313	Sorl1	4.290395866	0.105120187	5.350999116	3.27E-124	9.98E-120
B_cell	ENSMUSG00000036469	Marchf1	13.46687485	0.514840423	4.709145952	1.01E-122	3.07E-118
B_cell	ENSMUSG00000052889	Prkcb	10.86785295	0.575864397	4.238194009	5.67E-119	1.73E-114
B_cell	ENSMUSG00000000244	Tspan32	2.23686527	0.04809739	5.539375953	3.65E-115	1.11E-110
B_cell	ENSMUSG00000073678	Pgap1	6.973749001	0.199721815	5.12587061	1.32E-114	4.02E-110
B_cell	ENSMUSG00000026395	Ptprc	16.95509956	1.293648152	3.712202066	4.17E-113	1.27E-108
B_cell	ENSMUSG00000020143	Dock2	13.52049701	0.78941023	4.098229161	1.30E-108	3.96E-104
B_cell	ENSMUSG00000057069	Ero1lb	4.806808352	0.181719271	4.725295959	1.26E-103	3.85E-99
B_cell	ENSMUSG00000049744	Arhgap15	33.42701414	1.841867662	4.181773179	5.24E-103	1.60E-98
B_cell	ENSMUSG00000097705	Gm26740	10.81003168	0.713377059	3.921562118	1.36E-101	4.15E-97
B_cell	ENSMUSG00000035697	Arhgap45	9.902636379	0.617982359	4.002175105	2.12E-94	6.47E-90
B_cell	ENSMUSG00000036594	H2-Aa	21.29854489	2.414949682	3.140689835	4.76E-92	1.45E-87
B_cell	ENSMUSG00000029254	Stap1	3.563877546	0.088907101	5.325005302	8.68E-92	2.64E-87
B_cell	ENSMUSG00000024610	Cd74	72.50559493	5.938774801	3.609855094	8.26E-88	2.52E-83
B_cell	ENSMUSG00000084788	Gm11342	2.910216794	0.094445285	4.945504041	1.15E-86	3.51E-82
B_cell	ENSMUSG00000021457	Syk	13.02949561	0.621875034	4.389012727	3.00E-84	9.13E-80
B_cell	ENSMUSG00000073421	H2-Ab1	16.16958579	2.500951491	2.692733742	2.79E-81	8.49E-77
B_cell	ENSMUSG00000060586	H2-Eb1	16.60950097	2.539302445	2.709504585	9.78E-81	2.98E-76
B_cell	ENSMUSG00000044770	Scml4	3.052176051	0.086242057	5.145302788	1.05E-77	3.19E-73
B_cell	ENSMUSG00000038578	Susd1	2.18054261	0.070655394	4.947743672	4.95E-77	1.51E-72
B_cell	ENSMUSG00000069911	Insyn2b	4.969673233	0.24239648	4.357710339	5.99E-75	1.83E-70
B_cell	ENSMUSG00000051506	Wdfy4	4.468265358	0.29555733	3.918204958	1.55E-70	4.73E-66
B_cell	ENSMUSG00000043263	Ifi209	2.789932659	0.096603205	4.85201543	6.27E-70	1.91E-65
B_cell	ENSMUSG00000040270	Bach2	27.01492983	1.141976398	4.564152195	2.00E-65	6.08E-61
B_cell	ENSMUSG00000026616	Cr2	4.249656645	0.149081894	4.833169325	2.78E-65	8.47E-61
B_cell	ENSMUSG00000040747	Cd53	3.318892784	0.215828599	3.94274407	1.21E-63	3.69E-59
B_cell	ENSMUSG00000026655	Fam107b	4.616648048	0.202969332	4.507512092	3.65E-63	1.11E-58
B_cell	ENSMUSG00000008496	Pou2f2	3.972999501	0.187437886	4.405744116	1.06E-62	3.24E-58
B_cell	ENSMUSG00000079419	Ms4a6c	6.853712481	0.65792082	3.380899799	5.14E-62	1.57E-57
B_cell	ENSMUSG00000032688	Malt1	5.62815237	0.445822915	3.65811871	6.54E-61	1.99E-56
B_cell	ENSMUSG00000059456	Ptk2b	4.059212688	0.257579281	3.978111476	1.05E-57	3.19E-53
B_cell	ENSMUSG00000023927	Satb1	4.668141296	0.205579882	4.505077234	1.59E-57	4.84E-53
B_cell	ENSMUSG00000016756	Cmah	5.274774591	0.519119301	3.344971411	2.94E-57	8.96E-53
B_cell	ENSMUSG00000031264	Btk	2.468853618	0.163764243	3.914149008	5.83E-56	1.78E-51
B_cell	ENSMUSG00000027009	Itga4	5.002386046	0.434819788	3.524126897	2.27E-55	6.93E-51
B_cell	ENSMUSG00000033767	Tmem131l	5.462169466	0.46099309	3.566657043	7.90E-54	2.41E-49
B_cell	ENSMUSG00000030707	Coro1a	2.021435412	0.108363873	4.221424334	3.36E-50	1.02E-45
B_cell	ENSMUSG00000026094	Stk17b	6.075433498	0.493833389	3.620891063	2.60E-49	7.93E-45
B_cell	ENSMUSG00000061132	Blnk	6.692833095	0.509227763	3.716234055	1.17E-48	3.56E-44
B_cell	ENSMUSG00000030657	Xylt1	4.827702782	0.502093599	3.26530862	2.28E-48	6.94E-44
B_cell	ENSMUSG00000022952	Runx1	7.788075083	1.223785474	2.669916113	7.91E-48	2.41E-43
B_cell	ENSMUSG00000021423	Ly86	4.938041235	0.516674788	3.256610492	1.76E-47	5.36E-43
B_cell	ENSMUSG00000053219	Raet1e	2.642667963	0.164503573	4.005804347	4.49E-47	1.37E-42
B_cell	ENSMUSG00000029270	Dipk1a	3.651965782	0.357414743	3.353002197	5.36E-46	1.63E-41
B_cell	ENSMUSG00000018654	Ikzf1	5.034571521	0.40531728	3.63474541	3.02E-44	9.21E-40
B_cell	ENSMUSG00000030067	Foxp1	31.21512746	4.141247912	2.914107881	1.26E-43	3.85E-39
B_cell	ENSMUSG00000026399	Cd55	8.976265268	0.920042092	3.286343539	6.49E-43	1.98E-38
B_cell	ENSMUSG00000058470	Gm8369	4.117879145	0.404463525	3.347819981	3.00E-41	9.14E-37
B_cell	ENSMUSG00000030047	Arhgap25	2.756820351	0.227928869	3.596349685	6.39E-40	1.95E-35
B_cell	ENSMUSG00000051212	Gpr183	3.127175452	0.201368267	3.956951905	5.89E-39	1.79E-34
B_cell	ENSMUSG00000024696	Lpxn	1.936933831	0.122058762	3.988126899	2.95E-37	8.98E-33
B_cell	ENSMUSG00000030691	Fchsd2	18.65716857	1.919080509	3.281242916	1.17E-36	3.56E-32
B_cell	ENSMUSG00000004568	Arhgef18	5.290355136	0.484074513	3.450063532	2.66E-36	8.10E-32
B_cell	ENSMUSG00000038147	Cd84	3.22066938	0.336710194	3.257781263	5.23E-36	1.59E-31
B_cell	ENSMUSG00000009585	Apobec3	5.554522061	0.588399807	3.238794102	5.38E-36	1.64E-31
B_cell	ENSMUSG00000022885	St6gal1	7.090797345	1.018074719	2.800104416	6.96E-36	2.12E-31
B_cell	ENSMUSG00000023169	Slc38a1	2.621440348	0.213470747	3.618249431	5.84E-35	1.78E-30
B_cell	ENSMUSG00000036273	Lrrk2	6.487408129	0.723826518	3.163926335	4.93E-34	1.50E-29
B_cell	ENSMUSG00000003746	Man1a	19.07692321	2.944683704	2.695643923	5.46E-33	1.67E-28
B_cell	ENSMUSG00000020788	Atp2a3	1.532787579	0.124117097	3.626384015	6.54E-33	1.99E-28
B_cell	ENSMUSG00000020275	Rel	3.481279266	0.362478214	3.263651357	8.09E-33	2.46E-28
B_cell	ENSMUSG00000053641	Dennd4a	9.601078898	1.112092738	3.109919434	6.02E-32	1.83E-27
B_cell	ENSMUSG00000032870	Smap2	5.128533002	0.61445122	3.06117582	1.25E-31	3.81E-27
B_cell	ENSMUSG00000037940	Inpp4b	11.34655519	1.542213917	2.879179565	3.33E-31	1.01E-26
B_cell	ENSMUSG00000034484	Snx2	7.698478024	1.132480753	2.765086724	5.27E-31	1.61E-26
B_cell	ENSMUSG00000021733	Slc4a7	3.49794402	0.494773916	2.821665852	7.60E-31	2.32E-26
B_cell	ENSMUSG00000047867	Gimap6	5.451590887	0.805127066	2.759388906	6.70E-30	2.04E-25
B_cell	ENSMUSG00000004661	Arid3b	1.705654782	0.143780549	3.568385254	3.91E-29	1.19E-24
B_cell	ENSMUSG00000086825	Gm15675	1.804887931	0.134946653	3.741448162	1.82E-27	5.54E-23
B_cell	ENSMUSG00000052085	Dock8	4.82291801	1.018899191	2.242894965	2.01E-27	6.11E-23
B_cell	ENSMUSG00000034165	Ccnd3	8.373487106	1.362376006	2.619703621	2.64E-27	8.04E-23
B_cell	ENSMUSG00000022488	Nckap1l	1.894245538	0.230981226	3.035775851	3.71E-27	1.13E-22
B_cell	ENSMUSG00000021277	Traf3	3.474260989	0.519994553	2.740137719	3.93E-27	1.20E-22
B_cell	ENSMUSG00000026288	Inpp5d	5.619150816	1.071681406	2.390476043	4.79E-27	1.46E-22
B_cell	ENSMUSG00000034330	Plcg2	2.824547556	0.24839023	3.507339457	6.62E-27	2.02E-22
B_cell	ENSMUSG00000017561	Crlf3	5.66477571	0.780327776	2.859866676	3.77E-26	1.15E-21
B_cell	ENSMUSG00000047767	Atg16l2	6.039634763	0.702885837	3.103099017	5.22E-26	1.59E-21
B_cell	ENSMUSG00000042228	Lyn	9.921607076	2.156531754	2.201860864	1.87E-25	5.69E-21
B_cell	ENSMUSG00000028159	Dapp1	2.603033345	0.357752239	2.863161091	5.20E-25	1.59E-20
B_cell	ENSMUSG00000035021	Baz1a	2.870898532	0.433427162	2.727640871	6.62E-24	2.02E-19
B_cell	ENSMUSG00000038608	Dock10	7.815974979	1.368264803	2.514078384	8.76E-24	2.67E-19
B_cell	ENSMUSG00000038175	Mylip	3.308856622	0.502661198	2.718674546	1.01E-23	3.08E-19
B_cell	ENSMUSG00000052397	Ezr	2.71183352	0.45525174	2.574532177	2.18E-22	6.64E-18
B_cell	ENSMUSG00000052760	A630001G21Rik	2.060115993	0.195543816	3.397161752	2.72E-22	8.29E-18
B_cell	ENSMUSG00000090019	Gimap1	2.709334856	0.335125094	3.01516709	4.29E-22	1.31E-17
B_cell	ENSMUSG00000073563	Csnk1g3	6.864199594	1.180558334	2.539622174	5.74E-22	1.75E-17
B_cell	ENSMUSG00000025017	Pik3ap1	2.258743963	0.330966143	2.770765201	6.74E-22	2.05E-17
B_cell	ENSMUSG00000052331	Ankrd44	8.490686825	2.085982413	2.025154266	1.30E-21	3.95E-17
B_cell	ENSMUSG00000025647	Shisa5	6.687180987	1.045615098	2.677046286	1.52E-21	4.63E-17
B_cell	ENSMUSG00000021365	Nedd9	7.63865779	1.865290244	2.033919026	2.14E-21	6.52E-17
B_cell	ENSMUSG00000028121	Bcar3	3.020598314	0.341218105	3.146068241	5.17E-21	1.58E-16
B_cell	ENSMUSG00000030727	Rabep2	1.619602809	0.171155019	3.242264542	5.76E-21	1.76E-16
B_cell	ENSMUSG00000015597	Zfp318	3.294717425	0.354162682	3.217670626	6.78E-21	2.07E-16
B_cell	ENSMUSG00000027639	Samhd1	5.068050041	0.830772118	2.608906067	1.23E-20	3.75E-16
B_cell	ENSMUSG00000031093	Dock11	5.286682964	0.992917019	2.412617756	2.57E-20	7.84E-16
B_cell	ENSMUSG00000026786	Apbb1ip	4.965542128	0.873380828	2.507268469	5.70E-20	1.74E-15
B_cell	ENSMUSG00000069094	Pde7a	4.970166241	0.781075863	2.669759523	2.44E-19	7.43E-15
B_cell	ENSMUSG00000015340	Cybb	2.525800179	0.431114144	2.550598708	2.49E-19	7.60E-15
B_cell	ENSMUSG00000091908	Gm17231	1.972227963	0.250036996	2.979612835	4.05E-19	1.23E-14
B_cell	ENSMUSG00000070738	Dgkd	5.585829736	0.848628524	2.718566523	5.01E-19	1.53E-14
B_cell	ENSMUSG00000043004	Gng2	2.293271399	0.433260191	2.404101512	4.84E-18	1.48E-13
B_cell	ENSMUSG00000002897	Il17ra	1.512618385	0.207042843	2.869046819	7.93E-18	2.42E-13
B_cell	ENSMUSG00000032312	Csk	1.768928906	0.224633781	2.977229263	1.14E-17	3.47E-13
B_cell	ENSMUSG00000032000	Birc3	2.983960218	0.524861341	2.507220058	1.26E-17	3.85E-13
B_cell	ENSMUSG00000037795	N4bp2	1.933104601	0.282515504	2.774517754	1.49E-17	4.53E-13
B_cell	ENSMUSG00000032624	Eml4	5.992876015	1.132043392	2.404319268	3.05E-17	9.28E-13
B_cell	ENSMUSG00000031015	Swap70	3.601475878	0.716876301	2.328792138	3.60E-16	1.10E-11
B_cell	ENSMUSG00000074886	Grk6	1.783241016	0.241433289	2.88480519	5.37E-16	1.64E-11
B_cell	ENSMUSG00000035171	1110059E24Rik	2.591811037	0.498294825	2.378889041	6.03E-16	1.84E-11
B_cell	ENSMUSG00000047180	Neurl3	2.207473632	0.296121472	2.898135192	6.16E-16	1.88E-11
B_cell	ENSMUSG00000029084	Cd38	3.505732536	0.637376202	2.459498873	9.89E-16	3.01E-11
B_cell	ENSMUSG00000071669	Snx29	4.850385505	1.201554813	2.013196952	1.99E-15	6.08E-11
B_cell	ENSMUSG00000101674	4930444A19Rik	3.483522961	0.72692198	2.260674639	2.45E-15	7.48E-11
B_cell	ENSMUSG00000040710	St8sia4	4.791226603	1.105233147	2.116044312	4.26E-15	1.30E-10
B_cell	ENSMUSG00000029560	Snx8	2.076158792	0.299629155	2.792666877	6.56E-15	2.00E-10
B_cell	ENSMUSG00000037754	Ppp1r16b	2.557350128	0.510285597	2.325272866	8.65E-15	2.64E-10
B_cell	ENSMUSG00000027508	Pag1	3.058865139	0.540313112	2.501128904	9.34E-15	2.85E-10
B_cell	ENSMUSG00000018209	Stk4	2.906749469	0.49165514	2.563688102	1.71E-14	5.21E-10
B_cell	ENSMUSG00000039987	Phtf2	3.62078176	0.620380411	2.545076183	4.47E-14	1.36E-09
B_cell	ENSMUSG00000031902	Nfatc3	4.512883469	0.867052994	2.379857447	1.08E-13	3.29E-09
B_cell	ENSMUSG00000026637	Traf5	2.542984929	0.42957354	2.565545873	2.08E-13	6.33E-09
B_cell	ENSMUSG00000090394	4930523C07Rik	4.529140726	1.123795276	2.010858125	2.14E-13	6.53E-09
B_cell	ENSMUSG00000032220	Myo1e	5.38770104	1.157734033	2.218365939	2.88E-13	8.76E-09
B_cell	ENSMUSG00000034663	Bmp2k	2.962748239	0.648047062	2.192765545	3.29E-13	1.00E-08
B_cell	ENSMUSG00000047735	Samd9l	4.720922545	1.034298567	2.19041611	4.00E-13	1.22E-08
B_cell	ENSMUSG00000033885	Pxk	3.179540314	0.694976792	2.193781495	4.47E-13	1.36E-08
B_cell	ENSMUSG00000051344	Plekhm3	3.149701941	0.744907939	2.080081268	7.83E-13	2.39E-08
B_cell	ENSMUSG00000036478	Btg1	2.164035254	0.457153933	2.242972065	1.47E-12	4.48E-08
B_cell	ENSMUSG00000097634	Gm26827	3.12945457	0.48600687	2.686862621	2.44E-12	7.43E-08
B_cell	ENSMUSG00000040940	Arhgef1	4.15680892	0.948279854	2.13209164	6.31E-12	1.92E-07
B_cell	ENSMUSG00000026341	Actr3	6.135688855	1.427925215	2.103304901	1.60E-11	4.87E-07
B_cell	ENSMUSG00000054435	Gimap4	2.077095377	0.343488127	2.596235329	6.66E-11	2.03E-06
B_cell	ENSMUSG00000057329	Bcl2	5.508456167	1.218810557	2.176174136	1.82E-10	5.54E-06
B_cell	ENSMUSG00000044167	Foxo1	4.232598554	1.021863909	2.050340589	2.20E-10	6.71E-06
B_cell	ENSMUSG00000056144	Trim34a	2.388987387	0.372116156	2.682574302	3.14E-10	9.57E-06
B_cell	ENSMUSG00000025357	Dgka	1.871977113	0.396699672	2.238443689	3.24E-10	9.89E-06
B_cell	ENSMUSG00000036986	Pml	2.246461842	0.446017188	2.332483343	3.68E-10	1.12E-05
B_cell	ENSMUSG00000047368	Abhd17b	3.305261755	0.75271201	2.134594632	3.80E-10	1.16E-05
B_cell	ENSMUSG00000031557	Plekha2	2.510214243	0.561822453	2.159624314	4.48E-10	1.37E-05
B_cell	ENSMUSG00000029217	Tec	2.955473831	0.483756923	2.611035234	3.30E-09	0.00010061
B_cell	ENSMUSG00000069892	9930111J21Rik2	2.315645137	0.568405076	2.02642284	3.68E-09	0.000112257
B_cell	ENSMUSG00000028385	Snx30	2.437984052	0.429304108	2.505616804	4.22E-09	0.000128605
B_cell	ENSMUSG00000021262	Evl	2.40329153	0.517395634	2.215671878	4.34E-09	0.000132213
B_cell	ENSMUSG00000021180	Rps6ka5	3.473768187	0.760673615	2.191152014	5.93E-09	0.00018064
B_cell	ENSMUSG00000035629	Rubcn	1.907698596	0.422131587	2.176068561	6.07E-09	0.000184959
B_cell	ENSMUSG00000072620	Slfn2	1.971956291	0.480390075	2.037349326	6.49E-09	0.000197819
B_cell	ENSMUSG00000057110	Cntrl	2.421068691	0.573461131	2.077876403	6.96E-09	0.000212039
B_cell	ENSMUSG00000021830	Txndc16	2.095093187	0.395232144	2.406242226	1.94E-08	0.000591325
B_cell	ENSMUSG00000027423	Snx5	2.91693226	0.679403006	2.102112375	3.95E-08	0.001204669
B_cell	ENSMUSG00000087259	2610035D17Rik	2.97896366	0.632818437	2.234946987	4.00E-08	0.001220582
B_cell	ENSMUSG00000041765	Ubac2	3.301839955	0.734580157	2.168278361	8.45E-08	0.002576647
B_cell	ENSMUSG00000042460	C1galt1	2.154451181	0.48428604	2.153389087	2.84E-07	0.008663217
Cardiomyocytes	ENSMUSG00000115610	Gm31251	3.346434584	0.048926382	6.095868399	0	0
Cardiomyocytes	ENSMUSG00000054477	Kcnn2	3.882597514	0.058978728	6.040683637	0	0
Cardiomyocytes	ENSMUSG00000093400	Gm20647	2.345510559	0.035802161	6.033711498	0	0
Cardiomyocytes	ENSMUSG00000044499	Hs3st5	3.626246601	0.063972901	5.824872323	0	0
Cardiomyocytes	ENSMUSG00000019828	Grm1	8.748749196	0.160454284	5.768842556	0	0
Cardiomyocytes	ENSMUSG00000086354	Gm13938	1.526640619	0.029327241	5.701975315	0	0
Cardiomyocytes	ENSMUSG00000100457	D830032E09Rik	2.076129473	0.040818465	5.668530679	0	0
Cardiomyocytes	ENSMUSG00000043639	Rbm20	14.90460845	0.312091369	5.577646205	0	0
Cardiomyocytes	ENSMUSG00000112707	D830005E20Rik	8.063425112	0.186542805	5.433814162	0	0
Cardiomyocytes	ENSMUSG00000114053	Gm35330	2.760631598	0.06944169	5.313052512	0	0
Cardiomyocytes	ENSMUSG00000086866	4930512H18Rik	1.714524204	0.043223919	5.309834572	0	0
Cardiomyocytes	ENSMUSG00000031137	Fgf13	17.5827249	0.460859595	5.253687572	0	0
Cardiomyocytes	ENSMUSG00000040086	Tnni3k	5.932311004	0.159804367	5.214215492	0	0
Cardiomyocytes	ENSMUSG00000033182	Kbtbd12	2.792665712	0.090818766	4.942508639	0	0
Cardiomyocytes	ENSMUSG00000097652	Mhrt	6.215053124	0.210051573	4.886951226	0	0
Cardiomyocytes	ENSMUSG00000026610	Esrrg	7.844079155	0.284959412	4.782775744	0	0
Cardiomyocytes	ENSMUSG00000026824	Kcnj3	5.053505509	0.191642381	4.720795951	0	0
Cardiomyocytes	ENSMUSG00000045613	Chrm2	7.968475346	0.303100767	4.716434302	0	0
Cardiomyocytes	ENSMUSG00000032355	Mlip	6.509027909	0.25311797	4.684560263	0	0
Cardiomyocytes	ENSMUSG00000005220	Corin	6.035850736	0.245493088	4.619802816	0	0
Cardiomyocytes	ENSMUSG00000060913	Trim55	2.401928087	0.104295157	4.525448884	0	0
Cardiomyocytes	ENSMUSG00000020542	Myocd	5.702269619	0.265760916	4.423335402	0	0
Cardiomyocytes	ENSMUSG00000060843	Ctnna3	21.94757336	1.040809378	4.398283665	0	0
Cardiomyocytes	ENSMUSG00000106515	Gm30382	2.070913278	0.100905024	4.359197221	0	0
Cardiomyocytes	ENSMUSG00000042846	Lrrtm3	6.579023476	0.345302713	4.251939886	0	0
Cardiomyocytes	ENSMUSG00000021313	Ryr2	50.59904856	2.688594247	4.234186307	0	0
Cardiomyocytes	ENSMUSG00000051331	Cacna1c	33.51852264	1.807192282	4.213136643	0	0
Cardiomyocytes	ENSMUSG00000022383	Ppara	2.104650896	0.116029525	4.181017078	0	0
Cardiomyocytes	ENSMUSG00000029167	Ppargc1a	4.914466174	0.273306928	4.168440779	0	0
Cardiomyocytes	ENSMUSG00000049537	Tecrl	1.647124296	0.094475988	4.123857916	0	0
Cardiomyocytes	ENSMUSG00000093482	Gm20619	2.53283675	0.145666334	4.120014707	0	0
Cardiomyocytes	ENSMUSG00000045103	Dmd	40.13421078	2.320690175	4.112206695	0	0
Cardiomyocytes	ENSMUSG00000034295	Fhod3	11.09817835	0.648611275	4.096824981	0	0
Cardiomyocytes	ENSMUSG00000021898	Asb14	1.82034315	0.111533468	4.028661847	0	0
Cardiomyocytes	ENSMUSG00000032511	Scn5a	2.899453379	0.189210943	3.937713509	0	0
Cardiomyocytes	ENSMUSG00000085440	Sorbs2os	6.272234528	0.412188981	3.927601662	0	0
Cardiomyocytes	ENSMUSG00000021699	Pde4d	31.87028306	2.115059194	3.913441887	0	0
Cardiomyocytes	ENSMUSG00000062209	Erbb4	7.318589789	0.492086	3.894583306	0	0
Cardiomyocytes	ENSMUSG00000058056	Palld	12.17544846	0.834806976	3.866388445	0	0
Cardiomyocytes	ENSMUSG00000020067	Mypn	2.202523833	0.151917737	3.857795405	0	0
Cardiomyocytes	ENSMUSG00000008136	Fhl2	38.21435619	2.679416819	3.834123791	0	0
Cardiomyocytes	ENSMUSG00000069601	Ank3	4.344913194	0.313562589	3.792502004	0	0
Cardiomyocytes	ENSMUSG00000038132	Rbm24	3.951762896	0.291141055	3.762706189	0	0
Cardiomyocytes	ENSMUSG00000024304	Cdh2	10.09693005	0.758060405	3.735460089	0	0
Cardiomyocytes	ENSMUSG00000040896	Kcnd3	1.724500757	0.13013461	3.728102151	0	0
Cardiomyocytes	ENSMUSG00000061603	Akap6	9.006029661	0.693141787	3.699668828	0	0
Cardiomyocytes	ENSMUSG00000019787	Trdn	25.14773285	1.951307214	3.687915503	0	0
Cardiomyocytes	ENSMUSG00000032845	Alpk2	2.000471044	0.159964231	3.644518493	0	0
Cardiomyocytes	ENSMUSG00000085779	Atcayos	2.298675717	0.184795701	3.636799852	0	0
Cardiomyocytes	ENSMUSG00000035296	Sgcg	2.20546572	0.208370232	3.403862246	0	0
Cardiomyocytes	ENSMUSG00000039126	Prune2	5.718276164	0.54582994	3.389056858	0	0
Cardiomyocytes	ENSMUSG00000026207	Speg	2.241962932	0.218158603	3.361313155	0	0
Cardiomyocytes	ENSMUSG00000038763	Alpk3	1.980134018	0.198484953	3.318496531	0	0
Cardiomyocytes	ENSMUSG00000031382	Asb11	1.979499881	0.200116285	3.306225502	0	0
Cardiomyocytes	ENSMUSG00000023951	Vegfa	4.151545479	0.425259265	3.287233929	0	0
Cardiomyocytes	ENSMUSG00000057914	Cacnb2	8.851128448	0.911015891	3.280313274	0	0
Cardiomyocytes	ENSMUSG00000072720	Myo18b	3.385231573	0.358556114	3.238983704	0	0
Cardiomyocytes	ENSMUSG00000060882	Kcnd2	11.51864195	1.2392082	3.216480131	0	0
Cardiomyocytes	ENSMUSG00000059852	Kcng2	2.820002292	0.30660017	3.201265934	0	0
Cardiomyocytes	ENSMUSG00000033871	Ppargc1b	2.559169049	0.278772269	3.198516489	0	0
Cardiomyocytes	ENSMUSG00000030996	Art1	2.195808698	0.241839601	3.182629961	0	0
Cardiomyocytes	ENSMUSG00000051747	Ttn	225.6200138	24.85870424	3.182072046	0	0
Cardiomyocytes	ENSMUSG00000039601	Rcan2	8.142889853	0.931799872	3.127448851	0	0
Cardiomyocytes	ENSMUSG00000024302	Dtna	2.088929693	0.244559526	3.094506373	0	0
Cardiomyocytes	ENSMUSG00000041957	Pkp2	2.282859773	0.271302056	3.072870357	0	0
Cardiomyocytes	ENSMUSG00000031626	Sorbs2	10.86917257	1.317973505	3.043848844	0	0
Cardiomyocytes	ENSMUSG00000044033	Ccdc141	5.216714719	0.644908658	3.015974796	0	0
Cardiomyocytes	ENSMUSG00000038170	Pde4dip	15.27115895	1.904677596	3.003190835	0	0
Cardiomyocytes	ENSMUSG00000036585	Fgf1	2.508998889	0.315803378	2.990013326	0	0
Cardiomyocytes	ENSMUSG00000031808	Slc27a1	1.688165238	0.218646898	2.948781335	0	0
Cardiomyocytes	ENSMUSG00000021798	Ldb3	7.945378064	1.044166783	2.9277637	0	0
Cardiomyocytes	ENSMUSG00000053093	Myh7	5.493512275	0.728835307	2.914064076	0	0
Cardiomyocytes	ENSMUSG00000039652	Cpeb3	5.426698523	0.720494766	2.913014907	0	0
Cardiomyocytes	ENSMUSG00000033610	Pank1	1.485259621	0.20224615	2.876530992	0	0
Cardiomyocytes	ENSMUSG00000006576	Slc4a3	2.85348328	0.395705759	2.850224142	0	0
Cardiomyocytes	ENSMUSG00000041477	Dcp1b	2.635027392	0.365697711	2.849094457	0	0
Cardiomyocytes	ENSMUSG00000024867	Pip5k1b	2.598603098	0.3616589	2.845034737	0	0
Cardiomyocytes	ENSMUSG00000026888	Grb14	3.393695411	0.473928391	2.840116092	0	0
Cardiomyocytes	ENSMUSG00000027861	Casq2	5.042373027	0.705337202	2.837717811	0	0
Cardiomyocytes	ENSMUSG00000020836	Coro6	1.643791753	0.234183746	2.81131469	0	0
Cardiomyocytes	ENSMUSG00000028834	Trim63	2.157157546	0.307526097	2.810350798	0	0
Cardiomyocytes	ENSMUSG00000054640	Slc8a1	33.25045016	4.784015069	2.797080034	0	0
Cardiomyocytes	ENSMUSG00000021373	Cap2	2.050825052	0.297968023	2.782975009	0	0
Cardiomyocytes	ENSMUSG00000061462	Obscn	6.464116588	0.959730843	2.751751456	0	0
Cardiomyocytes	ENSMUSG00000042717	Ppp1r3a	2.368420257	0.353577933	2.743824955	0	0
Cardiomyocytes	ENSMUSG00000075324	Fign	1.646311186	0.246535137	2.739371879	0	0
Cardiomyocytes	ENSMUSG00000029108	Pcdh7	24.35403736	3.648275678	2.738874305	0	0
Cardiomyocytes	ENSMUSG00000015112	Slc25a13	1.979371052	0.297667284	2.733269511	0	0
Cardiomyocytes	ENSMUSG00000032495	Lrrc2	3.460065347	0.521399124	2.73033922	0	0
Cardiomyocytes	ENSMUSG00000004347	Pde1c	2.608276003	0.393934283	2.727069661	0	0
Cardiomyocytes	ENSMUSG00000030852	Tacc2	8.450795604	1.278600989	2.724521056	0	0
Cardiomyocytes	ENSMUSG00000070867	Trabd2b	2.655533634	0.413214961	2.684037406	0	0
Cardiomyocytes	ENSMUSG00000040648	Ppip5k2	3.876452479	0.614076909	2.658245719	0	0
Cardiomyocytes	ENSMUSG00000042680	Garem1	1.894878163	0.304063786	2.639659183	0	0
Cardiomyocytes	ENSMUSG00000050315	Synpo2	4.128572646	0.664504558	2.635292092	0	0
Cardiomyocytes	ENSMUSG00000052512	Nav2	3.41693541	0.552710075	2.628108161	0	0
Cardiomyocytes	ENSMUSG00000017817	Jph2	3.174960209	0.515016212	2.62404876	0	0
Cardiomyocytes	ENSMUSG00000056900	Usp13	2.523066924	0.41192946	2.614709263	0	0
Cardiomyocytes	ENSMUSG00000024049	Myom1	12.46330034	2.048385048	2.605127313	0	0
Cardiomyocytes	ENSMUSG00000027698	Nceh1	3.899363138	0.651575267	2.581234768	0	0
Cardiomyocytes	ENSMUSG00000044393	Dsg2	1.574665701	0.263380558	2.579824818	0	0
Cardiomyocytes	ENSMUSG00000039103	Nexn	14.34864816	2.436367336	2.558111249	0	0
Cardiomyocytes	ENSMUSG00000022519	Srl	3.252354747	0.552485187	2.557476938	0	0
Cardiomyocytes	ENSMUSG00000050953	Gja1	6.050281681	1.033128984	2.549981928	0	0
Cardiomyocytes	ENSMUSG00000049265	Kcnk3	1.417802355	0.249446758	2.506852606	0	0
Cardiomyocytes	ENSMUSG00000034981	Parm1	1.578775495	0.281306908	2.488589144	0	0
Cardiomyocytes	ENSMUSG00000024924	Vldlr	3.297411002	0.589246822	2.484389743	0	0
Cardiomyocytes	ENSMUSG00000029019	Nppb	7.441846936	1.330500691	2.483691457	0	0
Cardiomyocytes	ENSMUSG00000052374	Actn2	10.89596353	1.949121035	2.482898194	0	0
Cardiomyocytes	ENSMUSG00000022270	Retreg1	3.834588958	0.687557864	2.479518899	0	0
Cardiomyocytes	ENSMUSG00000021200	Asb2	3.854542593	0.692641772	2.476378368	0	0
Cardiomyocytes	ENSMUSG00000051910	Sox6	5.332622575	0.961212076	2.471918543	0	0
Cardiomyocytes	ENSMUSG00000031698	Mylk3	4.279907093	0.771883567	2.471124331	0	0
Cardiomyocytes	ENSMUSG00000047746	Fbxo40	1.486701274	0.270188683	2.460075638	0	0
Cardiomyocytes	ENSMUSG00000042010	Acacb	3.042959013	0.554169217	2.457076423	0	0
Cardiomyocytes	ENSMUSG00000019810	Fuca2	1.485849396	0.274508393	2.436365728	0	0
Cardiomyocytes	ENSMUSG00000047419	Cmya5	6.629251127	1.224991451	2.436074225	0	0
Cardiomyocytes	ENSMUSG00000038663	Fsd2	2.217088429	0.411598289	2.429357424	0	0
Cardiomyocytes	ENSMUSG00000038239	Hrc	8.428561358	1.583743653	2.411947566	0	0
Cardiomyocytes	ENSMUSG00000040653	Ppp1r14c	3.722507468	0.705594517	2.399363488	0	0
Cardiomyocytes	ENSMUSG00000118383	Gm50321	3.769634464	0.735352507	2.357916726	0	0
Cardiomyocytes	ENSMUSG00000031791	Tmem38a	2.200622402	0.432860206	2.345938539	0	0
Cardiomyocytes	ENSMUSG00000025551	Fgf14	3.775731746	0.748115384	2.335423565	0	0
Cardiomyocytes	ENSMUSG00000039891	Txlnb	6.959410032	1.381692292	2.332528652	0	0
Cardiomyocytes	ENSMUSG00000028977	Casz1	2.000406798	0.400721615	2.319621177	0	0
Cardiomyocytes	ENSMUSG00000048486	Fitm2	1.352565095	0.272489087	2.311427671	0	0
Cardiomyocytes	ENSMUSG00000045776	Lrtm1	1.653108828	0.336267229	2.297501613	0	0
Cardiomyocytes	ENSMUSG00000053702	Nebl	5.692447268	1.169614747	2.283015616	0	0
Cardiomyocytes	ENSMUSG00000027022	Xirp2	7.394578152	1.526380968	2.276352758	0	0
Cardiomyocytes	ENSMUSG00000031312	Itgb1bp2	1.352930896	0.279932272	2.272938428	0	0
Cardiomyocytes	ENSMUSG00000028518	Prkaa2	1.72691004	0.360369128	2.260645601	0	0
Cardiomyocytes	ENSMUSG00000022358	Fbxo32	1.856079287	0.38833597	2.256881091	0	0
Cardiomyocytes	ENSMUSG00000003810	Mast2	4.37515582	0.924989994	2.241824734	0	0
Cardiomyocytes	ENSMUSG00000030409	Dmpk	1.557499913	0.339067749	2.199586611	0	0
Cardiomyocytes	ENSMUSG00000027452	Acss1	2.270637372	0.499891316	2.183410951	0	0
Cardiomyocytes	ENSMUSG00000022803	Popdc2	3.540465983	0.7800289	2.182339774	0	0
Cardiomyocytes	ENSMUSG00000032902	Slc16a1	1.551600987	0.346941861	2.160991771	0	0
Cardiomyocytes	ENSMUSG00000033060	Lmo7	7.519388745	1.706723722	2.13938585	0	0
Cardiomyocytes	ENSMUSG00000030747	Dgat2	1.72059633	0.393589514	2.128144976	0	0
Cardiomyocytes	ENSMUSG00000040752	Myh6	163.3522403	37.82291095	2.110653934	0	0
Cardiomyocytes	ENSMUSG00000026576	Atp1b1	2.866570079	0.664418966	2.109160388	0	0
Cardiomyocytes	ENSMUSG00000028348	Cavin4	1.344481358	0.313774505	2.099249712	0	0
Cardiomyocytes	ENSMUSG00000029467	Atp2a2	79.82060506	18.82717995	2.083944295	0	0
Cardiomyocytes	ENSMUSG00000029683	Lmod2	6.317022481	1.491272356	2.082700941	0	0
Cardiomyocytes	ENSMUSG00000025006	Sorbs1	12.43816049	2.950449856	2.075766293	0	0
Cardiomyocytes	ENSMUSG00000054889	Dsp	6.826853357	1.664218069	2.036376275	0	0
Cardiomyocytes	ENSMUSG00000064302	Clasp1	5.771699807	1.426963392	2.016047942	0	0
Cardiomyocytes	ENSMUSG00000000628	Hk2	2.060575214	0.510435945	2.013245293	0	0
Cardiomyocytes	ENSMUSG00000028525	Pde4b	7.347403157	1.441355574	2.349808155	2.40E-304	7.30E-300
Cardiomyocytes	ENSMUSG00000027784	Ppm1l	1.575381688	0.377946355	2.059448029	1.29E-302	3.92E-298
Cardiomyocytes	ENSMUSG00000019577	Pdk4	5.704455872	1.163596598	2.293498297	1.60E-291	4.86E-287
Cardiomyocytes	ENSMUSG00000020593	Lpin1	1.547474172	0.35568451	2.121245278	1.28E-275	3.89E-271
Cardiomyocytes	ENSMUSG00000021779	Thrb	4.105968171	1.02311015	2.004760967	1.50E-275	4.58E-271
Cardiomyocytes	ENSMUSG00000040003	Magi2	16.51421208	3.568697811	2.21023849	3.87E-272	1.18E-267
Cardiomyocytes	ENSMUSG00000025920	Stau2	1.606784587	0.366885747	2.130773765	9.32E-270	2.84E-265
Cardiomyocytes	ENSMUSG00000035357	Pdzrn3	3.096324709	0.70869621	2.127317535	1.01E-264	3.07E-260
Cardiomyocytes	ENSMUSG00000021219	Rgs6	2.759970295	0.636273115	2.11693467	6.24E-258	1.90E-253
Cardiomyocytes	ENSMUSG00000041616	Nppa	47.51112341	7.125233079	2.737256207	4.29E-46	1.31E-41
Endocardial_cells	ENSMUSG00000062991	Nrg1	10.0302316	0.088660934	6.821840641	0	0
Endocardial_cells	ENSMUSG00000042757	Tmem108	22.42582343	0.364214974	5.944226912	0	0
Endocardial_cells	ENSMUSG00000019817	Plagl1	2.568359281	0.05270735	5.606699058	0	0
Endocardial_cells	ENSMUSG00000034845	Plvap	6.620066751	0.150118487	5.462672207	0	0
Endocardial_cells	ENSMUSG00000021136	Smoc1	4.202748571	0.10126859	5.375074473	0	0
Endocardial_cells	ENSMUSG00000022206	Npr3	23.12141871	0.561090533	5.364852541	0	0
Endocardial_cells	ENSMUSG00000022868	Ahsg	4.107510306	0.10525163	5.286349717	0	0
Endocardial_cells	ENSMUSG00000038173	Enpp6	3.575031411	0.10937798	5.030561689	0	0
Endocardial_cells	ENSMUSG00000001930	Vwf	16.20401453	0.517681644	4.96814231	0	0
Endocardial_cells	ENSMUSG00000000031	H19	2.905772646	0.101840799	4.834534283	0	0
Endocardial_cells	ENSMUSG00000046159	Chrm3	14.81687051	0.520553575	4.831050303	0	0
Endocardial_cells	ENSMUSG00000031377	Bmx	4.349417323	0.156840458	4.793452479	0	0
Endocardial_cells	ENSMUSG00000089809	Rasgef1b	6.549323491	0.262389804	4.641562328	0	0
Endocardial_cells	ENSMUSG00000028289	Epha7	4.837709424	0.20928792	4.530763172	0	0
Endocardial_cells	ENSMUSG00000063564	Col23a1	2.526181776	0.11644379	4.439252841	0	0
Endocardial_cells	ENSMUSG00000062329	Cytl1	8.253218264	0.384137816	4.425260893	0	0
Endocardial_cells	ENSMUSG00000023809	Rps6ka2	9.307923574	0.437206982	4.41207102	0	0
Endocardial_cells	ENSMUSG00000024754	Cemip2	10.90589792	0.531026717	4.360180298	0	0
Endocardial_cells	ENSMUSG00000032232	Cgnl1	14.68505399	0.776588524	4.241054372	0	0
Endocardial_cells	ENSMUSG00000058396	Gpr182	2.078103431	0.140590479	3.885696658	0	0
Endocardial_cells	ENSMUSG00000066842	Hmcn1	28.80945456	1.949785144	3.885155286	0	0
Endocardial_cells	ENSMUSG00000027375	Mal	1.890395508	0.134322758	3.814912443	0	0
Endocardial_cells	ENSMUSG00000038007	Acer2	7.218651166	0.5202031	3.794582386	0	0
Endocardial_cells	ENSMUSG00000027800	Tm4sf1	40.88314091	3.089228115	3.726187726	0	0
Endocardial_cells	ENSMUSG00000031849	Comp	2.601756772	0.197929789	3.716425435	0	0
Endocardial_cells	ENSMUSG00000031673	Cdh11	7.799556285	0.598426791	3.704145382	0	0
Endocardial_cells	ENSMUSG00000047250	Ptgs1	3.982805394	0.308302707	3.691365527	0	0
Endocardial_cells	ENSMUSG00000040605	Bace2	4.796673572	0.380825671	3.654831627	0	0
Endocardial_cells	ENSMUSG00000093650	Gm20631	5.291116949	0.487112144	3.441246451	0	0
Endocardial_cells	ENSMUSG00000057751	Megf6	1.43057815	0.132357131	3.434090478	0	0
Endocardial_cells	ENSMUSG00000028456	Unc13b	7.385450539	0.727664985	3.343339638	0	0
Endocardial_cells	ENSMUSG00000026604	Ptpn14	5.634070352	0.597470322	3.237238622	0	0
Endocardial_cells	ENSMUSG00000024534	Sncaip	8.113655658	0.897974591	3.175605549	0	0
Endocardial_cells	ENSMUSG00000036867	Smad6	3.627682239	0.409152342	3.148338077	0	0
Endocardial_cells	ENSMUSG00000037852	Cpe	8.848708226	1.021834936	3.114304692	0	0
Endocardial_cells	ENSMUSG00000041731	Pgm5	4.598499206	0.550231184	3.063053282	0	0
Endocardial_cells	ENSMUSG00000031486	Adgra2	1.866220992	0.225407953	3.049509511	0	0
Endocardial_cells	ENSMUSG00000022122	Ednrb	5.091726867	0.621570548	3.03416498	0	0
Endocardial_cells	ENSMUSG00000031636	Pdlim3	4.479898106	0.592139006	2.919458122	0	0
Endocardial_cells	ENSMUSG00000031379	Pir	2.265934463	0.30152057	2.909777803	0	0
Endocardial_cells	ENSMUSG00000032702	Kank1	3.33465756	0.450114677	2.889174105	0	0
Endocardial_cells	ENSMUSG00000044258	Ctla2a	5.695402481	0.778337555	2.871329924	0	0
Endocardial_cells	ENSMUSG00000025551	Fgf14	5.544108495	0.76258323	2.861988781	0	0
Endocardial_cells	ENSMUSG00000026814	Eng	22.45336004	3.188934127	2.815785152	0	0
Endocardial_cells	ENSMUSG00000032289	Thsd4	3.665091815	0.523963353	2.806311525	0	0
Endocardial_cells	ENSMUSG00000042942	Greb1l	3.404139037	0.497005558	2.775956072	0	0
Endocardial_cells	ENSMUSG00000033502	Cdc14a	2.706213938	0.398731456	2.762786567	0	0
Endocardial_cells	ENSMUSG00000032359	Ctsh	5.905373209	0.947608826	2.639664698	0	0
Endocardial_cells	ENSMUSG00000041445	Mmrn2	3.142886808	0.509088499	2.626101936	0	0
Endocardial_cells	ENSMUSG00000028978	Nos3	3.107750968	0.508646516	2.611135593	0	0
Endocardial_cells	ENSMUSG00000059810	Rgs3	4.182795529	0.684627493	2.611076342	0	0
Endocardial_cells	ENSMUSG00000054690	Emcn	16.7369713	2.742695943	2.609371886	0	0
Endocardial_cells	ENSMUSG00000027962	Vcam1	5.832548981	0.971855663	2.585312547	0	0
Endocardial_cells	ENSMUSG00000017978	Cadps2	2.848218445	0.475212096	2.583416335	0	0
Endocardial_cells	ENSMUSG00000038372	Gmds	9.26789224	1.577174583	2.554898904	0	0
Endocardial_cells	ENSMUSG00000057530	Ece1	9.972803989	1.726791562	2.529905247	0	0
Endocardial_cells	ENSMUSG00000020717	Pecam1	16.05639148	2.818546699	2.510124321	0	0
Endocardial_cells	ENSMUSG00000047045	Tmem164	6.952816572	1.240903841	2.486206206	0	0
Endocardial_cells	ENSMUSG00000026463	Atp2b4	4.337943614	0.778065227	2.479048291	0	0
Endocardial_cells	ENSMUSG00000036356	Csgalnact1	6.358825379	1.165958805	2.447243474	0	0
Endocardial_cells	ENSMUSG00000032412	Atp1b3	5.496935335	1.00949456	2.444994372	0	0
Endocardial_cells	ENSMUSG00000031517	Gpm6a	5.827120713	1.075044187	2.438387238	0	0
Endocardial_cells	ENSMUSG00000048376	F2r	2.121048403	0.39359077	2.43000925	0	0
Endocardial_cells	ENSMUSG00000039375	Wdr17	21.98055247	4.13206755	2.411291904	0	0
Endocardial_cells	ENSMUSG00000025597	Klhl4	1.572880083	0.298387692	2.398148749	0	0
Endocardial_cells	ENSMUSG00000048120	Entpd1	5.802499607	1.101466101	2.397249424	0	0
Endocardial_cells	ENSMUSG00000027210	Meis2	11.0913805	2.215232493	2.323908918	0	0
Endocardial_cells	ENSMUSG00000027533	Fabp5	9.939149781	2.0185902	2.299774391	0	0
Endocardial_cells	ENSMUSG00000020844	Nxn	7.783309356	1.595130095	2.286709608	0	0
Endocardial_cells	ENSMUSG00000026365	Cfh	48.23346207	10.19600926	2.242029777	0	0
Endocardial_cells	ENSMUSG00000039004	Bmp6	9.831210877	2.081834194	2.239513948	0	0
Endocardial_cells	ENSMUSG00000026836	Acvr1	3.476933465	0.75260494	2.207850796	0	0
Endocardial_cells	ENSMUSG00000052920	Prkg1	38.34938874	8.309259573	2.206411751	0	0
Endocardial_cells	ENSMUSG00000032679	Cd59a	2.384615846	0.519481555	2.198612443	0	0
Endocardial_cells	ENSMUSG00000035873	Pawr	2.079092489	0.461509574	2.171521456	0	0
Endocardial_cells	ENSMUSG00000030313	Dennd5b	7.704224135	1.745440901	2.142058166	0	0
Endocardial_cells	ENSMUSG00000021756	Il6st	7.814821054	1.818966741	2.103093674	0	0
Endocardial_cells	ENSMUSG00000032198	Dock6	3.786881592	0.884435095	2.098182134	0	0
Endocardial_cells	ENSMUSG00000041741	Pde3a	12.40146118	2.998456639	2.048218098	0	0
Endocardial_cells	ENSMUSG00000027435	Cd93	3.807800605	0.921452067	2.046976908	0	0
Endocardial_cells	ENSMUSG00000003134	Tbc1d8	1.59409988	0.307961315	2.371920983	8.72E-291	2.66E-286
Endocardial_cells	ENSMUSG00000022885	St6gal1	3.24588178	0.792628956	2.033892879	4.97E-290	1.52E-285
Endocardial_cells	ENSMUSG00000047414	Flrt2	3.771068974	0.856743656	2.138038029	8.74E-275	2.66E-270
Endocardial_cells	ENSMUSG00000026594	Ralgps2	1.600189858	0.324197444	2.303298466	4.80E-274	1.46E-269
Endocardial_cells	ENSMUSG00000039304	Tnfsf10	1.695977427	0.419887302	2.014042902	1.05E-237	3.19E-233
Endocardial_cells	ENSMUSG00000051934	Spats2	2.433289994	0.431287612	2.496186087	4.43E-219	1.35E-214
Endocardial_cells	ENSMUSG00000030788	Rnf141	1.590263257	0.388889167	2.031834659	1.13E-209	3.44E-205
Endothelial_cells	ENSMUSG00000037358	Dipk2b	2.586701154	0.103508054	4.64329846	0	0
Endothelial_cells	ENSMUSG00000000805	Car4	2.271109487	0.098319401	4.529777322	0	0
Endothelial_cells	ENSMUSG00000040283	Btnl9	4.300423629	0.186764604	4.525185819	0	0
Endothelial_cells	ENSMUSG00000032878	Ccdc85a	8.856631125	0.390774917	4.50234826	0	0
Endothelial_cells	ENSMUSG00000028427	Aqp7	2.115454942	0.097219337	4.443580855	0	0
Endothelial_cells	ENSMUSG00000071347	C1qtnf9	2.264136966	0.110260022	4.359979539	0	0
Endothelial_cells	ENSMUSG00000030889	Vwa3a	2.834663946	0.140336231	4.336218281	0	0
Endothelial_cells	ENSMUSG00000055639	Dach1	14.6404972	0.729842934	4.326234717	0	0
Endothelial_cells	ENSMUSG00000050919	Zfp366	3.57485733	0.19105178	4.225850059	0	0
Endothelial_cells	ENSMUSG00000030317	Timp4	3.277990786	0.179192952	4.193226	0	0
Endothelial_cells	ENSMUSG00000040570	Rundc3b	3.147330764	0.175556487	4.164121597	0	0
Endothelial_cells	ENSMUSG00000039167	Adgrl4	16.77919158	0.965081573	4.119878508	0	0
Endothelial_cells	ENSMUSG00000086584	Gm12002	3.424515516	0.198990139	4.105131055	0	0
Endothelial_cells	ENSMUSG00000032735	Ablim3	6.459140547	0.385109712	4.0680008	0	0
Endothelial_cells	ENSMUSG00000020181	Nav3	6.266286963	0.379938189	4.043774203	0	0
Endothelial_cells	ENSMUSG00000041134	Cyyr1	17.88487967	1.10964119	4.01057526	0	0
Endothelial_cells	ENSMUSG00000031785	Adgrg1	1.627960749	0.101845832	3.998607074	0	0
Endothelial_cells	ENSMUSG00000031442	Mcf2l	4.317441774	0.271863379	3.989222986	0	0
Endothelial_cells	ENSMUSG00000056313	Tcim	4.632260631	0.298954112	3.953720469	0	0
Endothelial_cells	ENSMUSG00000021708	Rasgrf2	3.72610529	0.245786934	3.922188312	0	0
Endothelial_cells	ENSMUSG00000022579	Gpihbp1	8.056393608	0.534064291	3.915048841	0	0
Endothelial_cells	ENSMUSG00000027219	Slc28a2	4.326471612	0.290034013	3.898896932	0	0
Endothelial_cells	ENSMUSG00000052387	Trpm3	3.128946737	0.212935697	3.877187366	0	0
Endothelial_cells	ENSMUSG00000030022	Adamts9	6.960367219	0.474212024	3.875559273	0	0
Endothelial_cells	ENSMUSG00000030411	Nova2	1.569968931	0.108112	3.860137439	0	0
Endothelial_cells	ENSMUSG00000020658	Efr3b	1.959044115	0.137945268	3.827982008	0	0
Endothelial_cells	ENSMUSG00000034911	Ushbp1	3.568221787	0.251575187	3.826143751	0	0
Endothelial_cells	ENSMUSG00000040584	Abcb1a	1.876821218	0.132873096	3.820170306	0	0
Endothelial_cells	ENSMUSG00000058254	Tspan7	7.564758279	0.556576887	3.76464108	0	0
Endothelial_cells	ENSMUSG00000022018	Rgcc	4.129915173	0.315325337	3.711199146	0	0
Endothelial_cells	ENSMUSG00000024395	Lims2	8.646711523	0.663329958	3.704352969	0	0
Endothelial_cells	ENSMUSG00000022272	Myo10	7.126237507	0.561316175	3.666255028	0	0
Endothelial_cells	ENSMUSG00000036144	Meox2	8.949004537	0.707626092	3.660668059	0	0
Endothelial_cells	ENSMUSG00000079018	Ly6c1	15.89315353	1.269985012	3.645522037	0	0
Endothelial_cells	ENSMUSG00000033174	Mgll	12.68692984	1.023422946	3.631868599	0	0
Endothelial_cells	ENSMUSG00000050271	Prag1	1.644108395	0.13443018	3.612376454	0	0
Endothelial_cells	ENSMUSG00000000440	Pparg	5.322940972	0.435326618	3.612053426	0	0
Endothelial_cells	ENSMUSG00000020641	Rsad2	2.235500826	0.183482032	3.606887384	0	0
Endothelial_cells	ENSMUSG00000000489	Pdgfb	2.54926872	0.210559425	3.597784099	0	0
Endothelial_cells	ENSMUSG00000029228	Lnx1	2.640905063	0.21913196	3.591160619	0	0
Endothelial_cells	ENSMUSG00000032028	Nxpe2	3.158720999	0.263124646	3.585522224	0	0
Endothelial_cells	ENSMUSG00000017309	Cd300lg	4.797214534	0.410963231	3.545115731	0	0
Endothelial_cells	ENSMUSG00000052921	Arhgef15	2.61269772	0.23072463	3.501296296	0	0
Endothelial_cells	ENSMUSG00000019970	Sgk1	4.580355929	0.424480713	3.431688802	0	0
Endothelial_cells	ENSMUSG00000046916	Myct1	2.334573302	0.220621305	3.403514867	0	0
Endothelial_cells	ENSMUSG00000085264	Gm15581	4.039801685	0.391639443	3.366686496	0	0
Endothelial_cells	ENSMUSG00000068079	Tcf15	2.637419265	0.257523412	3.35635143	0	0
Endothelial_cells	ENSMUSG00000019966	Kitl	11.25276759	1.099932328	3.354793201	0	0
Endothelial_cells	ENSMUSG00000074793	Hspa12b	3.601818622	0.360817852	3.319382908	0	0
Endothelial_cells	ENSMUSG00000062960	Kdr	8.911769097	0.898843604	3.309569835	0	0
Endothelial_cells	ENSMUSG00000049044	Rapgef4	2.91685706	0.296328159	3.299147057	0	0
Endothelial_cells	ENSMUSG00000028713	Cyp4b1	1.774316971	0.180927669	3.293778806	0	0
Endothelial_cells	ENSMUSG00000032006	Pdgfd	12.64573778	1.290547501	3.292596061	0	0
Endothelial_cells	ENSMUSG00000020577	Tspan13	4.023348128	0.411755958	3.288535143	0	0
Endothelial_cells	ENSMUSG00000051177	Plcb1	15.16907469	1.570133031	3.272174381	0	0
Endothelial_cells	ENSMUSG00000044921	Rassf9	3.453183526	0.370884867	3.218883702	0	0
Endothelial_cells	ENSMUSG00000031871	Cdh5	8.518056689	0.923155858	3.205878185	0	0
Endothelial_cells	ENSMUSG00000061353	Cxcl12	6.453741755	0.703321174	3.197880293	0	0
Endothelial_cells	ENSMUSG00000020154	Ptprb	12.51808656	1.364825815	3.197225313	0	0
Endothelial_cells	ENSMUSG00000007655	Cav1	11.52241336	1.259148946	3.193922064	0	0
Endothelial_cells	ENSMUSG00000071042	Rasgrp3	3.850340751	0.420991009	3.193124801	0	0
Endothelial_cells	ENSMUSG00000062515	Fabp4	70.58090722	7.729121014	3.190901714	0	0
Endothelial_cells	ENSMUSG00000029648	Flt1	18.92997478	2.0899178	3.179154383	0	0
Endothelial_cells	ENSMUSG00000027111	Itga6	5.64664783	0.625746982	3.173743323	0	0
Endothelial_cells	ENSMUSG00000036617	Etl4	16.95404865	1.93324939	3.132530169	0	0
Endothelial_cells	ENSMUSG00000038855	Itpkb	10.5909722	1.214493618	3.124408214	0	0
Endothelial_cells	ENSMUSG00000037754	Ppp1r16b	1.642804831	0.188416922	3.124160646	0	0
Endothelial_cells	ENSMUSG00000042099	Kank3	3.865743364	0.447031272	3.1122982	0	0
Endothelial_cells	ENSMUSG00000036611	Eepd1	2.335629677	0.270101091	3.112240174	0	0
Endothelial_cells	ENSMUSG00000046470	Sox18	1.652002266	0.19104696	3.112216456	0	0
Endothelial_cells	ENSMUSG00000025608	Podxl	4.517998836	0.52597177	3.102626624	0	0
Endothelial_cells	ENSMUSG00000044229	Nxpe4	3.412283501	0.412755295	3.047378888	0	0
Endothelial_cells	ENSMUSG00000041378	Cldn5	2.880392155	0.349261947	3.04388387	0	0
Endothelial_cells	ENSMUSG00000022469	Rapgef3	2.022080439	0.255953543	2.981886509	0	0
Endothelial_cells	ENSMUSG00000039943	Plcb4	14.45405248	1.850737065	2.965302188	0	0
Endothelial_cells	ENSMUSG00000022623	Shank3	5.429134421	0.695404202	2.964798515	0	0
Endothelial_cells	ENSMUSG00000056492	Adgrf5	10.88172186	1.395941022	2.962596964	0	0
Endothelial_cells	ENSMUSG00000042745	Id1	5.809773902	0.747595859	2.958151537	0	0
Endothelial_cells	ENSMUSG00000040265	Dnm3	6.366224862	0.820764418	2.955398021	0	0
Endothelial_cells	ENSMUSG00000027583	Zbtb46	3.695407966	0.483788883	2.933284121	0	0
Endothelial_cells	ENSMUSG00000021745	Ptprg	22.3442044	2.940086027	2.925970402	0	0
Endothelial_cells	ENSMUSG00000085709	Gm14211	2.821388063	0.372236248	2.922114656	0	0
Endothelial_cells	ENSMUSG00000047867	Gimap6	2.445401838	0.345155796	2.824751936	0	0
Endothelial_cells	ENSMUSG00000039706	Ldb2	6.453527553	0.919031908	2.811901108	0	0
Endothelial_cells	ENSMUSG00000045092	S1pr1	3.995769271	0.569962713	2.809533832	0	0
Endothelial_cells	ENSMUSG00000004655	Aqp1	6.775575847	0.990812803	2.773659149	0	0
Endothelial_cells	ENSMUSG00000033082	Clec1a	2.262267916	0.332479009	2.766434629	0	0
Endothelial_cells	ENSMUSG00000026991	Pkp4	8.061806925	1.200458723	2.747517433	0	0
Endothelial_cells	ENSMUSG00000038296	Galnt18	6.058958575	0.903391328	2.745646872	0	0
Endothelial_cells	ENSMUSG00000002504	Slc9a3r2	3.0602627	0.458171815	2.739694884	0	0
Endothelial_cells	ENSMUSG00000033788	Dysf	5.312700446	0.805024981	2.722339911	0	0
Endothelial_cells	ENSMUSG00000002944	Cd36	48.38128861	7.393303253	2.7101582	0	0
Endothelial_cells	ENSMUSG00000000058	Cav2	2.615685888	0.402535872	2.70000004	0	0
Endothelial_cells	ENSMUSG00000071856	Mcc	9.313992846	1.446195901	2.687136782	0	0
Endothelial_cells	ENSMUSG00000034037	Fgd5	4.125748335	0.652592554	2.660401391	0	0
Endothelial_cells	ENSMUSG00000062995	Ica1	2.871170824	0.455530994	2.656018045	0	0
Endothelial_cells	ENSMUSG00000020077	Srgn	3.15935674	0.502747571	2.651724738	0	0
Endothelial_cells	ENSMUSG00000030096	Slc6a6	6.292620745	1.005875581	2.645209129	0	0
Endothelial_cells	ENSMUSG00000054720	Lrrc8c	5.063060539	0.81197988	2.64049385	0	0
Endothelial_cells	ENSMUSG00000044562	Rasip1	2.091156737	0.336586909	2.635250229	0	0
Endothelial_cells	ENSMUSG00000024451	Arap3	2.077731911	0.336335687	2.627035747	0	0
Endothelial_cells	ENSMUSG00000020173	Cobl	2.088003015	0.338760337	2.623786921	0	0
Endothelial_cells	ENSMUSG00000058656	Samd12	4.937066898	0.816729463	2.595724016	0	0
Endothelial_cells	ENSMUSG00000052544	St6galnac3	6.749672286	1.121162389	2.589822204	0	0
Endothelial_cells	ENSMUSG00000033191	Tie1	2.924348117	0.486676586	2.587079789	0	0
Endothelial_cells	ENSMUSG00000033278	Ptprm	22.44054173	3.735627509	2.586684992	0	0
Endothelial_cells	ENSMUSG00000002688	Prkd1	4.063850304	0.683774366	2.571255016	0	0
Endothelial_cells	ENSMUSG00000045095	Magi1	11.36384271	1.945799555	2.546015763	0	0
Endothelial_cells	ENSMUSG00000026921	Egfl7	7.132733953	1.221921124	2.545304002	0	0
Endothelial_cells	ENSMUSG00000023008	Fmnl3	2.286959097	0.394653734	2.534771259	0	0
Endothelial_cells	ENSMUSG00000022895	Ets2	2.910806456	0.503312056	2.531893856	0	0
Endothelial_cells	ENSMUSG00000039844	Rapgef1	4.728523082	0.827072414	2.515304084	0	0
Endothelial_cells	ENSMUSG00000040181	Fmo1	3.118814812	0.554140311	2.492674667	0	0
Endothelial_cells	ENSMUSG00000001946	Esam	3.306686913	0.599592936	2.463331162	0	0
Endothelial_cells	ENSMUSG00000050530	Fam171a1	2.11121381	0.38631133	2.450236798	0	0
Endothelial_cells	ENSMUSG00000029207	Apbb2	10.9066153	2.00073026	2.446604873	0	0
Endothelial_cells	ENSMUSG00000032035	Ets1	5.850745437	1.087104932	2.428129246	0	0
Endothelial_cells	ENSMUSG00000034731	Dgkh	4.036413432	0.751689015	2.424866126	0	0
Endothelial_cells	ENSMUSG00000038235	F11r	1.838808528	0.342634913	2.424027195	0	0
Endothelial_cells	ENSMUSG00000054072	Iigp1	3.273584764	0.612737728	2.417529746	0	0
Endothelial_cells	ENSMUSG00000053062	Jam2	5.468330456	1.044179907	2.388730127	0	0
Endothelial_cells	ENSMUSG00000020642	Rnf144a	1.928903255	0.368818435	2.38679811	0	0
Endothelial_cells	ENSMUSG00000038143	Stox2	7.753514554	1.491187531	2.37838871	0	0
Endothelial_cells	ENSMUSG00000075010	AW112010	2.096232432	0.403206063	2.378209454	0	0
Endothelial_cells	ENSMUSG00000039735	Fnbp1l	3.150055402	0.610862691	2.366457167	0	0
Endothelial_cells	ENSMUSG00000051335	Gfod1	2.11690453	0.410587324	2.366195214	0	0
Endothelial_cells	ENSMUSG00000019647	Sema6a	6.569031953	1.27814873	2.36162506	0	0
Endothelial_cells	ENSMUSG00000075602	Ly6a	11.33041525	2.206001859	2.360694824	0	0
Endothelial_cells	ENSMUSG00000021108	Prkch	6.254874912	1.235232627	2.340198267	0	0
Endothelial_cells	ENSMUSG00000033377	Palmd	4.491640117	0.891921378	2.332253891	0	0
Endothelial_cells	ENSMUSG00000040732	Erg	2.580995681	0.512755238	2.331585499	0	0
Endothelial_cells	ENSMUSG00000032220	Myo1e	3.083361195	0.613224155	2.33001747	0	0
Endothelial_cells	ENSMUSG00000028184	Adgrl2	6.118878121	1.234379581	2.309481061	0	0
Endothelial_cells	ENSMUSG00000023959	Clic5	3.753795115	0.770111759	2.285210179	0	0
Endothelial_cells	ENSMUSG00000025969	Nrp2	5.550484636	1.142932123	2.279874018	0	0
Endothelial_cells	ENSMUSG00000016087	Fli1	12.41948015	2.557514633	2.279790387	0	0
Endothelial_cells	ENSMUSG00000022661	Cd200	3.644223464	0.767902352	2.246616657	0	0
Endothelial_cells	ENSMUSG00000068270	Shroom4	2.13373778	0.45707842	2.222869279	0	0
Endothelial_cells	ENSMUSG00000041261	Car8	3.014521302	0.646232803	2.221803035	0	0
Endothelial_cells	ENSMUSG00000040710	St8sia4	2.842668158	0.613456608	2.212212489	0	0
Endothelial_cells	ENSMUSG00000044456	Rin3	1.843345785	0.39810154	2.211118367	0	0
Endothelial_cells	ENSMUSG00000001029	Icam2	2.411495052	0.523236797	2.204391941	0	0
Endothelial_cells	ENSMUSG00000036019	Tmtc2	7.858226854	1.73032168	2.183163546	0	0
Endothelial_cells	ENSMUSG00000031841	Cdh13	10.98595112	2.459693055	2.15910958	0	0
Endothelial_cells	ENSMUSG00000035778	Ggta1	1.994588789	0.44744104	2.156321852	0	0
Endothelial_cells	ENSMUSG00000035168	Tanc1	5.049827065	1.138338375	2.149304516	0	0
Endothelial_cells	ENSMUSG00000029802	Abcg2	2.736693528	0.62558537	2.129155203	0	0
Endothelial_cells	ENSMUSG00000008398	Elk3	5.604158723	1.282630851	2.127391803	0	0
Endothelial_cells	ENSMUSG00000042807	Hecw2	3.402961883	0.784432004	2.11707069	0	0
Endothelial_cells	ENSMUSG00000040624	Plekhg1	4.502402301	1.038627477	2.116016673	0	0
Endothelial_cells	ENSMUSG00000004698	Hdac9	8.858798823	2.077343017	2.092371637	0	0
Endothelial_cells	ENSMUSG00000101799	9330175M20Rik	3.004799659	0.706244662	2.08902884	0	0
Endothelial_cells	ENSMUSG00000040430	Pitpnc1	8.905601777	2.095160253	2.087652505	0	0
Endothelial_cells	ENSMUSG00000068036	Afdn	7.09258394	1.670725504	2.085836599	0	0
Endothelial_cells	ENSMUSG00000022799	Arhgap31	10.721636	2.555130041	2.069056439	0	0
Endothelial_cells	ENSMUSG00000045954	Cavin2	7.562843051	1.807407583	2.065006799	0	0
Endothelial_cells	ENSMUSG00000020262	Adarb1	2.500478344	0.599391808	2.060632838	0	0
Endothelial_cells	ENSMUSG00000022307	Oxr1	6.598700197	1.581863065	2.060557155	0	0
Endothelial_cells	ENSMUSG00000025558	Dock9	6.489727906	1.557703863	2.058737004	0	0
Endothelial_cells	ENSMUSG00000026640	Plxna2	4.211681842	1.013278094	2.055366281	0	0
Endothelial_cells	ENSMUSG00000096054	Syne1	9.576283224	2.318801117	2.046086736	0	0
Endothelial_cells	ENSMUSG00000010476	Ebf3	2.54059822	0.62078579	2.033000801	0	0
Endothelial_cells	ENSMUSG00000071379	Hpcal1	1.959260543	0.482759455	2.020932841	0	0
Endothelial_cells	ENSMUSG00000025085	Ablim1	17.60435682	4.345539964	2.018325161	0	0
Endothelial_cells	ENSMUSG00000026110	Mgat4a	2.027424823	0.503119788	2.010674581	0	0
Endothelial_cells	ENSMUSG00000041187	Prkd2	1.600610547	0.357267058	2.163547518	4.76E-305	1.45E-300
Endothelial_cells	ENSMUSG00000031520	Vegfc	3.220129839	0.53923182	2.578141324	5.78E-225	1.76E-220
Epicardial_cells	ENSMUSG00000101797	Gm29266	3.937705695	0.004805198	9.678543597	0	0
Epicardial_cells	ENSMUSG00000001225	Slc26a3	2.093954903	0.004712035	8.795664334	0	0
Epicardial_cells	ENSMUSG00000109564	Muc16	17.16267485	0.038677318	8.793570949	0	0
Epicardial_cells	ENSMUSG00000051076	Vtcn1	1.855384779	0.004634736	8.645015478	0	0
Epicardial_cells	ENSMUSG00000052613	Pcdh15	12.54654647	0.039324293	8.317653747	0	0
Epicardial_cells	ENSMUSG00000035930	Chst4	2.106241996	0.006874172	8.25926952	0	0
Epicardial_cells	ENSMUSG00000027070	Lrp2	3.691267935	0.013075784	8.141075243	0	0
Epicardial_cells	ENSMUSG00000049436	Upk1b	5.782050932	0.022027361	8.036140842	0	0
Epicardial_cells	ENSMUSG00000018849	Wwc1	2.576643093	0.012505511	7.686784905	0	0
Epicardial_cells	ENSMUSG00000025105	Bnc1	1.451506748	0.007464721	7.603247161	0	0
Epicardial_cells	ENSMUSG00000043110	Lrrn4	4.120171298	0.021630552	7.573490018	0	0
Epicardial_cells	ENSMUSG00000118601	AL663045.1	1.558231845	0.008780701	7.471358074	0	0
Epicardial_cells	ENSMUSG00000063011	Msln	5.956037503	0.035469533	7.39162868	0	0
Epicardial_cells	ENSMUSG00000017723	Wfdc2	1.77313905	0.010660262	7.377919026	0	0
Epicardial_cells	ENSMUSG00000027520	Zdbf2	2.315890643	0.014263702	7.343074805	0	0
Epicardial_cells	ENSMUSG00000018919	Tm4sf5	2.242990603	0.013968816	7.327070003	0	0
Epicardial_cells	ENSMUSG00000027574	Nkain4	8.324535103	0.052384699	7.312080413	0	0
Epicardial_cells	ENSMUSG00000042985	Upk3b	11.81039092	0.078377819	7.235395568	0	0
Epicardial_cells	ENSMUSG00000040703	Cyp2s1	2.228334982	0.016571148	7.071148752	0	0
Epicardial_cells	ENSMUSG00000027015	Cybrd1	1.932619431	0.015211367	6.989263989	0	0
Epicardial_cells	ENSMUSG00000036098	Myrf	1.273083305	0.012014987	6.727347919	0	0
Epicardial_cells	ENSMUSG00000061451	Tmem151a	1.690363145	0.016744203	6.657527659	0	0
Epicardial_cells	ENSMUSG00000052430	Bmpr1b	2.013930097	0.022654043	6.474101226	0	0
Epicardial_cells	ENSMUSG00000034687	Fras1	3.658346082	0.042994588	6.410892688	0	0
Epicardial_cells	ENSMUSG00000020911	Krt19	3.008442331	0.035788953	6.39335857	0	0
Epicardial_cells	ENSMUSG00000008658	Rbfox1	94.75561674	1.156805007	6.355993856	0	0
Epicardial_cells	ENSMUSG00000053897	Slc39a8	3.878549839	0.054120155	6.163207556	0	0
Epicardial_cells	ENSMUSG00000052372	Il1rapl1	16.82419546	0.250824303	6.067716562	0	0
Epicardial_cells	ENSMUSG00000034813	Grip1	9.501870378	0.141753815	6.066752057	0	0
Epicardial_cells	ENSMUSG00000031112	Stk26	2.661902447	0.044109819	5.91521404	0	0
Epicardial_cells	ENSMUSG00000074987	Wt1os	2.666984418	0.04548487	5.87367887	0	0
Epicardial_cells	ENSMUSG00000024371	C2	1.841503493	0.034822582	5.724717136	0	0
Epicardial_cells	ENSMUSG00000028871	Rspo1	3.120418422	0.059314079	5.717221105	0	0
Epicardial_cells	ENSMUSG00000031283	Chrdl1	1.517653647	0.030261265	5.648226481	0	0
Epicardial_cells	ENSMUSG00000028528	Dnajc6	1.686918826	0.034053795	5.630431178	0	0
Epicardial_cells	ENSMUSG00000026070	Il18r1	2.577120973	0.053178581	5.598771176	0	0
Epicardial_cells	ENSMUSG00000041559	Fmod	2.729883331	0.064106721	5.412219867	0	0
Epicardial_cells	ENSMUSG00000055653	Gpc3	10.93836143	0.276859111	5.30410083	0	0
Epicardial_cells	ENSMUSG00000028943	Espn	1.906500782	0.049120733	5.27845123	0	0
Epicardial_cells	ENSMUSG00000038725	Pkhd1l1	18.75991732	0.496265037	5.240398842	0	0
Epicardial_cells	ENSMUSG00000034573	Ptpn13	6.443969921	0.173017584	5.218959187	0	0
Epicardial_cells	ENSMUSG00000001739	Cldn15	2.943270057	0.083266143	5.143546121	0	0
Epicardial_cells	ENSMUSG00000064115	Cadm2	5.078473237	0.145253692	5.127748099	0	0
Epicardial_cells	ENSMUSG00000039375	Wdr17	94.06079657	2.823727481	5.057920785	0	0
Epicardial_cells	ENSMUSG00000040612	Ildr2	2.748570285	0.087673755	4.970392515	0	0
Epicardial_cells	ENSMUSG00000025885	Myo5b	3.955545353	0.126575109	4.965810987	0	0
Epicardial_cells	ENSMUSG00000040254	Sema3d	7.52119688	0.244038416	4.945782083	0	0
Epicardial_cells	ENSMUSG00000087518	Gm13561	3.274734955	0.106970895	4.936087918	0	0
Epicardial_cells	ENSMUSG00000041607	Mbp	3.334649782	0.117218372	4.830264639	0	0
Epicardial_cells	ENSMUSG00000031517	Gpm6a	22.82175699	0.803308477	4.828311954	0	0
Epicardial_cells	ENSMUSG00000086320	Gm12840	2.293175726	0.087843182	4.706272787	0	0
Epicardial_cells	ENSMUSG00000003452	Bicd1	11.76759957	0.455150066	4.692333961	0	0
Epicardial_cells	ENSMUSG00000066113	Adamtsl1	6.522221541	0.254030698	4.682288691	0	0
Epicardial_cells	ENSMUSG00000026343	Gpr39	2.791084621	0.1112304	4.649202814	0	0
Epicardial_cells	ENSMUSG00000016458	Wt1	5.055952365	0.206760031	4.611953646	0	0
Epicardial_cells	ENSMUSG00000035000	Dpp4	11.40756437	0.470768024	4.598830652	0	0
Epicardial_cells	ENSMUSG00000031906	Smpd3	3.368913054	0.154056901	4.450747985	0	0
Epicardial_cells	ENSMUSG00000028970	Abcb1b	7.804795783	0.362446855	4.428519508	0	0
Epicardial_cells	ENSMUSG00000027318	Adam33	3.686858631	0.174651542	4.39984081	0	0
Epicardial_cells	ENSMUSG00000055137	Sugct	4.539309054	0.227055544	4.321355545	0	0
Epicardial_cells	ENSMUSG00000036298	Slc2a13	5.140047394	0.264730868	4.27918333	0	0
Epicardial_cells	ENSMUSG00000054675	Tmem119	1.696577258	0.090141014	4.234299642	0	0
Epicardial_cells	ENSMUSG00000106874	Gm20186	1.541247342	0.083212293	4.211157928	0	0
Epicardial_cells	ENSMUSG00000023169	Slc38a1	2.545363535	0.139263809	4.191979425	0	0
Epicardial_cells	ENSMUSG00000028780	Sema3c	7.166659987	0.400957203	4.159780749	0	0
Epicardial_cells	ENSMUSG00000044447	Dock5	3.05539049	0.173405868	4.139132149	0	0
Epicardial_cells	ENSMUSG00000021010	Npas3	6.23692254	0.355531889	4.13278347	0	0
Epicardial_cells	ENSMUSG00000033295	Ptprf	1.77854696	0.102485193	4.117211675	0	0
Epicardial_cells	ENSMUSG00000020733	Slc9a3r1	1.373044193	0.084017903	4.030537467	0	0
Epicardial_cells	ENSMUSG00000052397	Ezr	4.891901872	0.307189287	3.993195655	0	0
Epicardial_cells	ENSMUSG00000038119	Cdon	7.41834351	0.468143013	3.986075843	0	0
Epicardial_cells	ENSMUSG00000013584	Aldh1a2	2.955382231	0.194340437	3.926686712	0	0
Epicardial_cells	ENSMUSG00000053626	Tll1	3.955722816	0.260189421	3.926307126	0	0
Epicardial_cells	ENSMUSG00000020467	Efemp1	12.69438559	0.853561463	3.894551718	0	0
Epicardial_cells	ENSMUSG00000047787	Flrt1	1.279086716	0.089106559	3.843438641	0	0
Epicardial_cells	ENSMUSG00000009281	Rarres2	22.05080478	1.57025614	3.811759495	0	0
Epicardial_cells	ENSMUSG00000029765	Plxna4	29.77777379	2.129215682	3.805841899	0	0
Epicardial_cells	ENSMUSG00000026185	Igfbp5	29.46234137	2.129223028	3.790473106	0	0
Epicardial_cells	ENSMUSG00000024044	Epb41l3	3.672882377	0.271861011	3.755971527	0	0
Epicardial_cells	ENSMUSG00000051951	Xkr4	3.993100454	0.297219818	3.747907145	0	0
Epicardial_cells	ENSMUSG00000048915	Efna5	15.6369837	1.217111383	3.683429144	0	0
Epicardial_cells	ENSMUSG00000052407	Ccdc171	6.202992629	0.486287994	3.673081533	0	0
Epicardial_cells	ENSMUSG00000047414	Flrt2	10.45040782	0.820641058	3.670664096	0	0
Epicardial_cells	ENSMUSG00000021556	Golm1	2.298399951	0.180885792	3.667478867	0	0
Epicardial_cells	ENSMUSG00000001986	Gria3	3.86904445	0.311067312	3.636678599	0	0
Epicardial_cells	ENSMUSG00000038388	Mpp6	8.883416093	0.714704386	3.635696021	0	0
Epicardial_cells	ENSMUSG00000028487	Bnc2	7.075866656	0.577101195	3.616010637	0	0
Epicardial_cells	ENSMUSG00000016918	Sulf1	26.38993117	2.154145828	3.614799764	0	0
Epicardial_cells	ENSMUSG00000023046	Igfbp6	15.43147184	1.259803437	3.614605114	0	0
Epicardial_cells	ENSMUSG00000060961	Slc4a4	8.805810275	0.723625311	3.605140984	0	0
Epicardial_cells	ENSMUSG00000035413	Tmem98	1.266938393	0.105487042	3.58620868	0	0
Epicardial_cells	ENSMUSG00000029821	Gsdme	4.881529432	0.41324142	3.562276457	0	0
Epicardial_cells	ENSMUSG00000051910	Sox6	14.39866732	1.221282554	3.559466364	0	0
Epicardial_cells	ENSMUSG00000022865	Cxadr	2.182399087	0.186110224	3.551685732	0	0
Epicardial_cells	ENSMUSG00000059456	Ptk2b	2.305156651	0.197410782	3.545592105	0	0
Epicardial_cells	ENSMUSG00000060275	Nrg2	1.899176096	0.162795614	3.544239943	0	0
Epicardial_cells	ENSMUSG00000060882	Kcnd2	24.79741378	2.131184689	3.540462136	0	0
Epicardial_cells	ENSMUSG00000086720	Plxna4os3	1.997987625	0.171739853	3.540250881	0	0
Epicardial_cells	ENSMUSG00000033389	Arhgap44	2.165149185	0.18647183	3.537436825	0	0
Epicardial_cells	ENSMUSG00000020473	Aebp1	11.1016984	0.970200884	3.5163531	0	0
Epicardial_cells	ENSMUSG00000039701	Usp53	3.710916783	0.324417389	3.515852593	0	0
Epicardial_cells	ENSMUSG00000058297	Spock2	2.395920987	0.214305544	3.482839256	0	0
Epicardial_cells	ENSMUSG00000029381	Shroom3	5.271276945	0.480982545	3.454096047	0	0
Epicardial_cells	ENSMUSG00000032419	Tbx18	1.86895001	0.173500709	3.429214515	0	0
Epicardial_cells	ENSMUSG00000031673	Cdh11	10.28738294	0.998071181	3.365589495	0	0
Epicardial_cells	ENSMUSG00000003534	Ddr1	1.802964312	0.176867778	3.349627692	0	0
Epicardial_cells	ENSMUSG00000028583	Pdpn	2.445732767	0.244605059	3.321740631	0	0
Epicardial_cells	ENSMUSG00000032289	Thsd4	6.222484679	0.646941861	3.265782802	0	0
Epicardial_cells	ENSMUSG00000035873	Pawr	4.571622029	0.48383987	3.240104569	0	0
Epicardial_cells	ENSMUSG00000032352	Lrrc1	2.225692331	0.238335955	3.223185657	0	0
Epicardial_cells	ENSMUSG00000031613	Hpgd	6.531762499	0.701449178	3.219061848	0	0
Epicardial_cells	ENSMUSG00000031075	Ano1	4.255064084	0.458993119	3.21263643	0	0
Epicardial_cells	ENSMUSG00000028399	Ptprd	11.81871104	1.290720114	3.194824604	0	0
Epicardial_cells	ENSMUSG00000045414	Dipk2a	2.882408448	0.341955801	3.075393018	0	0
Epicardial_cells	ENSMUSG00000056427	Slit3	23.58019425	2.89816818	3.024362381	0	0
Epicardial_cells	ENSMUSG00000044646	Zbtb7c	4.546329751	0.577787165	2.976092268	0	0
Epicardial_cells	ENSMUSG00000001741	Il16	2.951480116	0.376341001	2.971326245	0	0
Epicardial_cells	ENSMUSG00000020173	Cobl	4.655253597	0.596120725	2.965183325	0	0
Epicardial_cells	ENSMUSG00000024164	C3	36.39372849	4.832642801	2.912805592	0	0
Epicardial_cells	ENSMUSG00000020422	Tns3	3.88222727	0.529250461	2.874862052	0	0
Epicardial_cells	ENSMUSG00000024998	Plce1	9.72343198	1.495584923	2.700755784	0	0
Epicardial_cells	ENSMUSG00000063450	Syne2	13.70293692	2.569096677	2.41515205	0	0
Epicardial_cells	ENSMUSG00000032902	Slc16a1	3.154332308	0.449849212	2.809821254	1.26E-306	3.83E-302
Epicardial_cells	ENSMUSG00000032340	Neo1	5.0822428	0.798464882	2.670164439	5.04E-300	1.54E-295
Epicardial_cells	ENSMUSG00000029701	Rbm28	5.936761435	0.844088942	2.814209211	6.22E-297	1.90E-292
Epicardial_cells	ENSMUSG00000053886	Sh2d4a	1.350866464	0.111653384	3.596786184	2.65E-296	8.07E-292
Epicardial_cells	ENSMUSG00000038859	Baiap2l1	2.291215694	0.265452288	3.109588797	1.51E-289	4.60E-285
Epicardial_cells	ENSMUSG00000016756	Cmah	3.946793074	0.41363904	3.254236619	2.95E-287	9.00E-283
Epicardial_cells	ENSMUSG00000058835	Abi1	13.15497398	2.496884306	2.397407514	1.26E-284	3.83E-280
Epicardial_cells	ENSMUSG00000057751	Megf6	1.782925048	0.20775884	3.101264284	2.72E-284	8.28E-280
Epicardial_cells	ENSMUSG00000047409	Ctdspl	4.239723175	0.622463651	2.767908572	4.43E-283	1.35E-278
Epicardial_cells	ENSMUSG00000039116	Adgrg6	2.312849577	0.30933114	2.90244746	6.39E-276	1.95E-271
Epicardial_cells	ENSMUSG00000032537	Ephb1	1.742961166	0.205811607	3.082144177	1.67E-266	5.08E-262
Epicardial_cells	ENSMUSG00000032702	Kank1	3.816401532	0.628154184	2.603022344	4.74E-263	1.45E-258
Epicardial_cells	ENSMUSG00000041238	Rbbp8	5.027916188	0.637084077	2.980404916	9.62E-263	2.93E-258
Epicardial_cells	ENSMUSG00000032548	Slco2a1	1.940684424	0.244853412	2.986575333	2.21E-254	6.75E-250
Epicardial_cells	ENSMUSG00000028152	Tspan5	4.30185699	0.778510878	2.466170462	1.01E-252	3.07E-248
Epicardial_cells	ENSMUSG00000039233	Tbce	3.907323551	0.564113964	2.792122171	2.01E-252	6.13E-248
Epicardial_cells	ENSMUSG00000044017	Adgrd1	3.451219548	0.668075119	2.369024018	2.34E-252	7.15E-248
Epicardial_cells	ENSMUSG00000001998	Ap4e1	2.555546785	0.348402159	2.874806533	1.28E-249	3.89E-245
Epicardial_cells	ENSMUSG00000027357	Crls1	1.464814437	0.172362747	3.087198011	1.34E-246	4.09E-242
Epicardial_cells	ENSMUSG00000052512	Nav2	4.698432813	0.885595771	2.40745938	5.97E-242	1.82E-237
Epicardial_cells	ENSMUSG00000111846	Gm47271	2.390481279	0.346207985	2.787590202	3.65E-225	1.11E-220
Epicardial_cells	ENSMUSG00000023868	Pde10a	6.677946789	0.62714658	3.412530016	5.43E-223	1.66E-218
Epicardial_cells	ENSMUSG00000061665	Cd2ap	10.2606798	2.139508023	2.261775322	1.11E-217	3.38E-213
Epicardial_cells	ENSMUSG00000021947	Cryl1	1.83186658	0.245304605	2.90066821	3.21E-209	9.78E-205
Epicardial_cells	ENSMUSG00000036528	Ppfibp2	2.605680704	0.403750166	2.690125552	1.32E-207	4.03E-203
Epicardial_cells	ENSMUSG00000021990	Spata13	2.649002895	0.411872762	2.685178794	5.87E-200	1.79E-195
Epicardial_cells	ENSMUSG00000029561	Oasl2	3.723642916	0.716566271	2.377542687	1.81E-199	5.51E-195
Epicardial_cells	ENSMUSG00000017969	Ptgis	4.270914443	1.065901043	2.002471492	6.39E-198	1.95E-193
Epicardial_cells	ENSMUSG00000018845	Unc45b	3.288022095	0.655369611	2.326839312	1.23E-195	3.74E-191
Epicardial_cells	ENSMUSG00000026576	Atp1b1	3.862629709	0.919981021	2.069907376	3.97E-194	1.21E-189
Epicardial_cells	ENSMUSG00000045629	Sh3tc2	1.529365673	0.255041046	2.584132044	5.15E-193	1.57E-188
Epicardial_cells	ENSMUSG00000024043	Arhgap28	3.118254117	0.69432432	2.167056893	5.02E-190	1.53E-185
Epicardial_cells	ENSMUSG00000046027	Stard5	2.348546692	0.416904589	2.493979119	4.65E-187	1.42E-182
Epicardial_cells	ENSMUSG00000017009	Sdc4	1.729440382	0.270157865	2.678430691	1.20E-182	3.65E-178
Epicardial_cells	ENSMUSG00000038473	Nos1ap	2.068195738	0.411426118	2.329667445	2.16E-182	6.60E-178
Epicardial_cells	ENSMUSG00000039457	Ppl	2.06519374	0.391038019	2.400896342	2.78E-178	8.46E-174
Epicardial_cells	ENSMUSG00000039405	Prss23	2.280445126	0.459787308	2.310276906	4.31E-178	1.31E-173
Epicardial_cells	ENSMUSG00000071454	Dtnb	1.800637653	0.29317253	2.618686058	7.01E-178	2.14E-173
Epicardial_cells	ENSMUSG00000045180	Shroom2	1.49354533	0.259554376	2.524632307	5.74E-171	1.75E-166
Epicardial_cells	ENSMUSG00000056234	Ncoa4	2.018888729	0.300983921	2.745803078	1.45E-167	4.42E-163
Epicardial_cells	ENSMUSG00000028960	Ube4b	3.975863298	0.841247736	2.240665532	5.32E-167	1.62E-162
Epicardial_cells	ENSMUSG00000059060	Rad51b	2.002790464	0.335059681	2.579521496	7.30E-166	2.22E-161
Epicardial_cells	ENSMUSG00000024074	Crim1	9.651887862	2.205914132	2.12943452	1.03E-163	3.13E-159
Epicardial_cells	ENSMUSG00000024098	Twsg1	2.351844821	0.463565607	2.342947433	2.12E-162	6.45E-158
Epicardial_cells	ENSMUSG00000031732	Phlpp2	2.279022496	0.419394897	2.442033952	3.77E-162	1.15E-157
Epicardial_cells	ENSMUSG00000022091	Sorbs3	2.479985212	0.539095826	2.201717873	6.15E-161	1.87E-156
Epicardial_cells	ENSMUSG00000030306	Tmtc1	10.07513475	2.400092926	2.069636964	5.30E-158	1.62E-153
Epicardial_cells	ENSMUSG00000022438	Parvb	2.433655108	0.554441725	2.134016991	9.29E-158	2.83E-153
Epicardial_cells	ENSMUSG00000060579	Fhit	4.108987582	0.907486636	2.178834668	1.43E-152	4.36E-148
Epicardial_cells	ENSMUSG00000031788	Kifc3	1.877001886	0.387181951	2.277346494	1.80E-152	5.49E-148
Epicardial_cells	ENSMUSG00000004633	Chn2	2.31160105	0.522525745	2.145318404	1.42E-146	4.34E-142
Epicardial_cells	ENSMUSG00000074749	Kiz	3.790387983	0.76310948	2.312383576	2.76E-144	8.43E-140
Epicardial_cells	ENSMUSG00000028121	Bcar3	1.698028345	0.301821981	2.492090761	6.76E-140	2.06E-135
Epicardial_cells	ENSMUSG00000002980	Bcam	3.432369053	0.793232605	2.113388798	3.67E-134	1.12E-129
Epicardial_cells	ENSMUSG00000024376	Epb41l4a	1.614899202	0.344020566	2.230877398	1.15E-132	3.49E-128
Epicardial_cells	ENSMUSG00000027784	Ppm1l	2.22419675	0.513171202	2.115772296	1.04E-131	3.18E-127
Epicardial_cells	ENSMUSG00000035305	Ror1	6.722366101	1.635518092	2.039221396	7.62E-130	2.32E-125
Epicardial_cells	ENSMUSG00000041949	Tango6	2.810572533	0.510055599	2.462137624	1.41E-128	4.29E-124
Epicardial_cells	ENSMUSG00000039206	Daglb	1.512664164	0.33440349	2.177429911	5.57E-128	1.70E-123
Epicardial_cells	ENSMUSG00000022257	Laptm4b	1.981159297	0.427273335	2.213113695	3.31E-118	1.01E-113
Epicardial_cells	ENSMUSG00000073418	C4b	2.83029718	0.517807146	2.450466762	6.62E-108	2.02E-103
Epicardial_cells	ENSMUSG00000032549	Rab6b	1.38894484	0.320857094	2.11398652	2.43E-105	7.41E-101
Epicardial_cells	ENSMUSG00000001761	Smo	1.600909644	0.391812431	2.030656807	3.29E-96	1.00E-91
Fibroblasts	ENSMUSG00000055632	Hmcn2	2.125756966	0.068280764	4.960353656	0	0
Fibroblasts	ENSMUSG00000079105	C7	3.022934714	0.113756185	4.731932931	0	0
Fibroblasts	ENSMUSG00000028369	Svep1	3.390135043	0.133739772	4.663842277	0	0
Fibroblasts	ENSMUSG00000055421	Pcdh9	19.03835115	0.765442108	4.636471458	0	0
Fibroblasts	ENSMUSG00000031963	Bmper	3.404673253	0.137221425	4.632938692	0	0
Fibroblasts	ENSMUSG00000025089	Gfra1	2.054555952	0.093971015	4.450466979	0	0
Fibroblasts	ENSMUSG00000043719	Col6a6	3.115883258	0.147505489	4.400800638	0	0
Fibroblasts	ENSMUSG00000022032	Scara5	4.591213807	0.219928615	4.383768387	0	0
Fibroblasts	ENSMUSG00000045573	Penk	1.752881997	0.08635139	4.343365669	0	0
Fibroblasts	ENSMUSG00000102758	Naaladl2	6.176808174	0.306563964	4.332601503	0	0
Fibroblasts	ENSMUSG00000029231	Pdgfra	7.685931451	0.391364648	4.29563476	0	0
Fibroblasts	ENSMUSG00000025784	Clec3b	14.14847633	0.72207976	4.292344682	0	0
Fibroblasts	ENSMUSG00000026879	Gsn	154.0136776	7.909524651	4.283323675	0	0
Fibroblasts	ENSMUSG00000024011	Pi16	6.5970707	0.347248861	4.2477837	0	0
Fibroblasts	ENSMUSG00000027797	Dclk1	1.737485428	0.092488036	4.231590316	0	0
Fibroblasts	ENSMUSG00000033327	Tnxb	11.50420022	0.642232882	4.162920347	0	0
Fibroblasts	ENSMUSG00000029096	Htra3	8.493917948	0.483419317	4.135083143	0	0
Fibroblasts	ENSMUSG00000057315	Arhgap24	12.08565628	0.694426917	4.121329137	0	0
Fibroblasts	ENSMUSG00000021614	Vcan	3.181659981	0.18325846	4.117827958	0	0
Fibroblasts	ENSMUSG00000031342	Gpm6b	4.875678134	0.281890794	4.112394624	0	0
Fibroblasts	ENSMUSG00000019278	Dpep1	7.447426192	0.436192718	4.093704332	0	0
Fibroblasts	ENSMUSG00000023886	Smoc2	8.490841457	0.5037153	4.075227078	0	0
Fibroblasts	ENSMUSG00000024678	Ms4a4d	3.399774487	0.201760363	4.074724373	0	0
Fibroblasts	ENSMUSG00000031561	Tenm3	6.855067229	0.408088806	4.070215773	0	0
Fibroblasts	ENSMUSG00000028339	Col15a1	8.016338869	0.490468183	4.03071204	0	0
Fibroblasts	ENSMUSG00000030513	Pcsk6	9.005739088	0.564849674	3.994905809	0	0
Fibroblasts	ENSMUSG00000041828	Abca8a	21.91157116	1.388926203	3.979651083	0	0
Fibroblasts	ENSMUSG00000044749	Abca6	5.138022873	0.326733911	3.975025211	0	0
Fibroblasts	ENSMUSG00000048126	Col6a3	4.749193267	0.30304055	3.970099707	0	0
Fibroblasts	ENSMUSG00000000753	Serpinf1	2.698455454	0.173151042	3.962030895	0	0
Fibroblasts	ENSMUSG00000024481	Lvrn	2.720844082	0.174729206	3.960861606	0	0
Fibroblasts	ENSMUSG00000031825	Crispld2	6.267684078	0.409887142	3.934633824	0	0
Fibroblasts	ENSMUSG00000033420	Antxr1	2.670898916	0.176887535	3.916421084	0	0
Fibroblasts	ENSMUSG00000031740	Mmp2	5.278419698	0.35389428	3.898715719	0	0
Fibroblasts	ENSMUSG00000027408	Cpxm1	1.556386366	0.104933891	3.890647637	0	0
Fibroblasts	ENSMUSG00000015354	Pcolce2	2.986347459	0.204369379	3.869131073	0	0
Fibroblasts	ENSMUSG00000001506	Col1a1	6.575980631	0.450900589	3.866324751	0	0
Fibroblasts	ENSMUSG00000040037	Negr1	6.486308982	0.447293833	3.858102977	0	0
Fibroblasts	ENSMUSG00000071984	Fndc1	2.980968848	0.207944328	3.841512062	0	0
Fibroblasts	ENSMUSG00000030116	Mfap5	6.486676227	0.455293808	3.832609686	0	0
Fibroblasts	ENSMUSG00000038668	Lpar1	2.776256947	0.195575319	3.827344876	0	0
Fibroblasts	ENSMUSG00000023885	Thbs2	2.979776766	0.211236544	3.818272904	0	0
Fibroblasts	ENSMUSG00000031548	Sfrp1	2.480313494	0.179270005	3.790316455	0	0
Fibroblasts	ENSMUSG00000026574	Dpt	5.805798402	0.430986799	3.751778891	0	0
Fibroblasts	ENSMUSG00000037206	Islr	4.07589598	0.3059352	3.73581922	0	0
Fibroblasts	ENSMUSG00000031558	Slit2	3.042722509	0.232430393	3.710492131	0	0
Fibroblasts	ENSMUSG00000020620	Abca8b	5.757380106	0.441881669	3.703680474	0	0
Fibroblasts	ENSMUSG00000015085	Entpd2	3.068516596	0.236419573	3.69812	0	0
Fibroblasts	ENSMUSG00000061535	C1qtnf7	4.997820931	0.388168348	3.686544825	0	0
Fibroblasts	ENSMUSG00000026837	Col5a1	4.139680945	0.322275946	3.683151162	0	0
Fibroblasts	ENSMUSG00000016194	Hsd11b1	3.852888996	0.307079952	3.649254388	0	0
Fibroblasts	ENSMUSG00000020363	Gfpt2	3.387869774	0.275132337	3.622180801	0	0
Fibroblasts	ENSMUSG00000019929	Dcn	86.59972687	7.048683714	3.618936699	0	0
Fibroblasts	ENSMUSG00000021268	Meg3	3.506266748	0.28572841	3.617219362	0	0
Fibroblasts	ENSMUSG00000032024	Clmp	2.51204362	0.205755487	3.609858707	0	0
Fibroblasts	ENSMUSG00000054203	Ifi205	3.035717647	0.249591867	3.60439478	0	0
Fibroblasts	ENSMUSG00000029659	Medag	3.062399524	0.259697059	3.559760931	0	0
Fibroblasts	ENSMUSG00000068196	Col8a1	6.153164885	0.525064791	3.550761291	0	0
Fibroblasts	ENSMUSG00000029563	Foxp2	6.078394693	0.519082116	3.549655669	0	0
Fibroblasts	ENSMUSG00000022425	Enpp2	2.671060943	0.22854803	3.546843602	0	0
Fibroblasts	ENSMUSG00000022894	Adamts5	10.13488425	0.867931904	3.545603946	0	0
Fibroblasts	ENSMUSG00000020695	Mrc2	2.359815346	0.208472451	3.500745322	0	0
Fibroblasts	ENSMUSG00000023224	Serping1	13.76868925	1.243790879	3.468575377	0	0
Fibroblasts	ENSMUSG00000029661	Col1a2	10.18659578	0.927847793	3.456640032	0	0
Fibroblasts	ENSMUSG00000032334	Loxl1	3.952560865	0.362205931	3.447905602	0	0
Fibroblasts	ENSMUSG00000027848	Olfml3	1.725425653	0.160157607	3.429388083	0	0
Fibroblasts	ENSMUSG00000053279	Aldh1a1	5.020208874	0.470319562	3.416034146	0	0
Fibroblasts	ENSMUSG00000020681	Ace	1.98868761	0.186381829	3.415483551	0	0
Fibroblasts	ENSMUSG00000034810	Scn7a	6.643712538	0.624166444	3.411986949	0	0
Fibroblasts	ENSMUSG00000036446	Lum	10.65229311	1.020574932	3.383710016	0	0
Fibroblasts	ENSMUSG00000029718	Pcolce	3.812172324	0.372845524	3.35396341	0	0
Fibroblasts	ENSMUSG00000020122	Egfr	6.4821074	0.638086622	3.344638731	0	0
Fibroblasts	ENSMUSG00000006369	Fbln1	6.174688222	0.612105802	3.334513343	0	0
Fibroblasts	ENSMUSG00000021390	Ogn	9.207726041	0.916948095	3.327932934	0	0
Fibroblasts	ENSMUSG00000020241	Col6a2	4.534664246	0.458334409	3.306523233	0	0
Fibroblasts	ENSMUSG00000046532	Ar	4.166650717	0.427506298	3.284870589	0	0
Fibroblasts	ENSMUSG00000022324	Matn2	2.294084829	0.242085528	3.244329997	0	0
Fibroblasts	ENSMUSG00000047216	Cdh19	2.107713532	0.225652516	3.223504028	0	0
Fibroblasts	ENSMUSG00000002847	Pla1a	2.161132792	0.231532699	3.222499859	0	0
Fibroblasts	ENSMUSG00000044017	Adgrd1	2.14847345	0.239320254	3.166297546	0	0
Fibroblasts	ENSMUSG00000059327	Eda	8.25224031	0.926319622	3.155203855	0	0
Fibroblasts	ENSMUSG00000070469	Adamtsl3	2.773682744	0.311505685	3.154472381	0	0
Fibroblasts	ENSMUSG00000001119	Col6a1	5.351810632	0.604317278	3.146648974	0	0
Fibroblasts	ENSMUSG00000026043	Col3a1	19.55172057	2.213169272	3.143109868	0	0
Fibroblasts	ENSMUSG00000111462	Gm49317	7.782734986	0.882199324	3.141100672	0	0
Fibroblasts	ENSMUSG00000026389	Steap3	1.800404341	0.21102122	3.092860959	0	0
Fibroblasts	ENSMUSG00000026674	Ddr2	2.819712919	0.332193773	3.08545135	0	0
Fibroblasts	ENSMUSG00000022261	Sdc2	6.454478357	0.765694542	3.075459625	0	0
Fibroblasts	ENSMUSG00000064080	Fbln2	10.31051551	1.230321133	3.067009632	0	0
Fibroblasts	ENSMUSG00000046318	Ccbe1	2.558175617	0.30880559	3.050344535	0	0
Fibroblasts	ENSMUSG00000034780	B3galt1	4.234432384	0.512359876	3.046939187	0	0
Fibroblasts	ENSMUSG00000055172	C1ra	2.150612337	0.262949374	3.031890524	0	0
Fibroblasts	ENSMUSG00000002602	Axl	3.997530874	0.498796296	3.00258652	0	0
Fibroblasts	ENSMUSG00000001918	Slc1a5	2.606371325	0.325857216	2.999730786	0	0
Fibroblasts	ENSMUSG00000059173	Pde1a	4.516948566	0.581014175	2.958703219	0	0
Fibroblasts	ENSMUSG00000040249	Lrp1	10.21439019	1.315355331	2.957078588	0	0
Fibroblasts	ENSMUSG00000022053	Ebf2	7.250238885	0.942129099	2.944031861	0	0
Fibroblasts	ENSMUSG00000026478	Lamc1	14.40701759	1.873434913	2.943013951	0	0
Fibroblasts	ENSMUSG00000002900	Lamb1	6.804560225	0.903372915	2.913108359	0	0
Fibroblasts	ENSMUSG00000029070	Mxra8	2.381340319	0.321967919	2.88678496	0	0
Fibroblasts	ENSMUSG00000022665	Ccdc80	10.52395653	1.428587736	2.881015648	0	0
Fibroblasts	ENSMUSG00000030074	Gxylt2	1.607367828	0.220266517	2.867378003	0	0
Fibroblasts	ENSMUSG00000035258	Abi3bp	3.932505173	0.544782602	2.851696127	0	0
Fibroblasts	ENSMUSG00000026249	Serpine2	2.943346115	0.409078446	2.847007771	0	0
Fibroblasts	ENSMUSG00000014329	Bicc1	12.59109451	1.753782364	2.843862065	0	0
Fibroblasts	ENSMUSG00000031748	Gnao1	1.717982158	0.241267893	2.83200721	0	0
Fibroblasts	ENSMUSG00000019899	Lama2	22.71369417	3.191339128	2.831328536	0	0
Fibroblasts	ENSMUSG00000047497	Adamts12	2.696704475	0.379347281	2.829606326	0	0
Fibroblasts	ENSMUSG00000004098	Col5a3	3.494207949	0.502710667	2.797165261	0	0
Fibroblasts	ENSMUSG00000036545	Adamts2	2.815086186	0.411066481	2.775735451	0	0
Fibroblasts	ENSMUSG00000005397	Nid1	9.793369866	1.462520423	2.743348601	0	0
Fibroblasts	ENSMUSG00000000957	Mmp14	1.941765618	0.29231911	2.73175302	0	0
Fibroblasts	ENSMUSG00000032014	Oaf	1.72021857	0.260271725	2.724501388	0	0
Fibroblasts	ENSMUSG00000027859	Ngf	2.942240889	0.446113016	2.721434221	0	0
Fibroblasts	ENSMUSG00000041577	Prelp	3.578315333	0.54525473	2.714278243	0	0
Fibroblasts	ENSMUSG00000043943	Naalad2	2.853350009	0.434957008	2.713712012	0	0
Fibroblasts	ENSMUSG00000021318	Gli3	1.815142637	0.277031691	2.711959994	0	0
Fibroblasts	ENSMUSG00000026077	Npas2	2.06522563	0.321733533	2.68236119	0	0
Fibroblasts	ENSMUSG00000052957	Gas1	3.984833219	0.624698217	2.673288025	0	0
Fibroblasts	ENSMUSG00000022816	Fstl1	8.038493209	1.271403947	2.660502626	0	0
Fibroblasts	ENSMUSG00000047712	Ust	2.542441552	0.407468638	2.641453679	0	0
Fibroblasts	ENSMUSG00000038521	C1s1	2.827056543	0.464109712	2.606762945	0	0
Fibroblasts	ENSMUSG00000026399	Cd55	2.371305071	0.404827037	2.550303727	0	0
Fibroblasts	ENSMUSG00000032925	Itgbl1	4.833789226	0.827322233	2.546633309	0	0
Fibroblasts	ENSMUSG00000032625	Thsd7a	9.452829395	1.622521012	2.542509056	0	0
Fibroblasts	ENSMUSG00000021186	Fbln5	2.253139319	0.392405141	2.521520675	0	0
Fibroblasts	ENSMUSG00000027204	Fbn1	8.738237848	1.570332391	2.47627241	0	0
Fibroblasts	ENSMUSG00000020354	Sgcd	13.66075691	2.470682082	2.467056135	0	0
Fibroblasts	ENSMUSG00000022371	Col14a1	1.875956847	0.34081434	2.460568699	0	0
Fibroblasts	ENSMUSG00000024164	C3	14.49894761	2.654331263	2.44952785	0	0
Fibroblasts	ENSMUSG00000037138	Aff3	1.434723648	0.263220247	2.446430506	0	0
Fibroblasts	ENSMUSG00000019539	Rcn3	2.685700283	0.49295487	2.445770833	0	0
Fibroblasts	ENSMUSG00000018819	Lsp1	1.819244491	0.340595206	2.417209407	0	0
Fibroblasts	ENSMUSG00000035299	Mid1	4.573939989	0.88015872	2.377601823	0	0
Fibroblasts	ENSMUSG00000031375	Bgn	10.45160215	2.037473715	2.358870761	0	0
Fibroblasts	ENSMUSG00000041757	Plekha6	2.237795639	0.444430092	2.332049884	0	0
Fibroblasts	ENSMUSG00000040852	Plekhh2	1.939100902	0.38649694	2.326858981	0	0
Fibroblasts	ENSMUSG00000061080	Lsamp	7.632212547	1.521631568	2.326482267	0	0
Fibroblasts	ENSMUSG00000002107	Celf2	29.15026758	5.836409076	2.320356215	0	0
Fibroblasts	ENSMUSG00000058571	Gpc6	20.51397942	4.140946445	2.308574932	0	0
Fibroblasts	ENSMUSG00000038400	Pmepa1	3.029342908	0.622641433	2.282531406	0	0
Fibroblasts	ENSMUSG00000026170	Cyp27a1	2.846157037	0.589980999	2.270274869	0	0
Fibroblasts	ENSMUSG00000031565	Fgfr1	2.968651384	0.615913016	2.269009163	0	0
Fibroblasts	ENSMUSG00000026748	Plxdc2	9.611951608	2.022302529	2.24883055	0	0
Fibroblasts	ENSMUSG00000026042	Col5a2	6.389460599	1.359306127	2.232823744	0	0
Fibroblasts	ENSMUSG00000029163	Emilin1	1.904270908	0.408694423	2.220144274	0	0
Fibroblasts	ENSMUSG00000031965	Tbx20	4.232823262	0.91043718	2.216988872	0	0
Fibroblasts	ENSMUSG00000018217	Pmp22	3.893652297	0.840090959	2.212506611	0	0
Fibroblasts	ENSMUSG00000039607	Rbms3	12.00858171	2.612558841	2.200530334	0	0
Fibroblasts	ENSMUSG00000030208	Emp1	2.24477408	0.496803617	2.175822675	0	0
Fibroblasts	ENSMUSG00000021876	Rnase4	4.249374029	0.942086784	2.173318465	0	0
Fibroblasts	ENSMUSG00000017969	Ptgis	2.693480231	0.601255669	2.163420979	0	0
Fibroblasts	ENSMUSG00000016494	Cd34	7.164913292	1.614415638	2.149937191	0	0
Fibroblasts	ENSMUSG00000048332	Lhfp	9.257970681	2.124519606	2.123559336	0	0
Fibroblasts	ENSMUSG00000028108	Ecm1	3.098450088	0.724902588	2.095687684	0	0
Fibroblasts	ENSMUSG00000000392	Fap	1.740014685	0.41267671	2.076015556	0	0
Fibroblasts	ENSMUSG00000028082	Sh3d19	3.916921939	0.932285641	2.070876425	0	0
Fibroblasts	ENSMUSG00000018339	Gpx3	4.975499875	1.193470239	2.059678886	0	0
Fibroblasts	ENSMUSG00000027074	Slc43a3	7.48287924	1.7953785	2.059305469	0	0
Fibroblasts	ENSMUSG00000060703	Cd302	3.266251676	0.791657216	2.04468817	0	0
Fibroblasts	ENSMUSG00000032238	Rora	23.30730952	5.652611543	2.043793015	0	0
Fibroblasts	ENSMUSG00000052726	Kcnt2	10.79740046	2.629254223	2.037958468	0	0
Fibroblasts	ENSMUSG00000017493	Igfbp4	4.981649169	1.21996288	2.029786173	0	0
Fibroblasts	ENSMUSG00000020053	Igf1	3.109517062	0.775952437	2.002650405	0	0
Lymphatic_ECs	ENSMUSG00000054641	Mmrn1	30.86884944	0.046336956	9.379772725	0	0
Lymphatic_ECs	ENSMUSG00000009097	Tbx1	1.762572071	0.002835769	9.279726769	0	0
Lymphatic_ECs	ENSMUSG00000042453	Reln	21.1115107	0.036659868	9.169612528	0	0
Lymphatic_ECs	ENSMUSG00000094686	Ccl21a	140.4145458	0.327135356	8.745588989	0	0
Lymphatic_ECs	ENSMUSG00000021187	Tc2n	3.200575728	0.018169475	7.460670888	0	0
Lymphatic_ECs	ENSMUSG00000026822	Lcn2	5.35944378	0.031922586	7.391361959	0	0
Lymphatic_ECs	ENSMUSG00000060470	Adgrg3	3.684570649	0.038691553	6.573334076	0	0
Lymphatic_ECs	ENSMUSG00000056025	Clca3a1	2.257721318	0.032751584	6.107158917	0	0
Lymphatic_ECs	ENSMUSG00000020357	Flt4	10.44572568	0.218999473	5.575841514	0	0
Lymphatic_ECs	ENSMUSG00000056214	Pard6g	6.298229222	0.164694583	5.257081256	0	0
Lymphatic_ECs	ENSMUSG00000029092	D5Ertd615e	8.417162781	0.232986709	5.175014453	0	0
Lymphatic_ECs	ENSMUSG00000000794	Kcnn3	2.975493207	0.098604668	4.915329072	0	0
Lymphatic_ECs	ENSMUSG00000030519	Apba2	2.531209793	0.084310037	4.907978878	0	0
Lymphatic_ECs	ENSMUSG00000028883	Sema3a	4.601597666	0.160624967	4.840366784	0	0
Lymphatic_ECs	ENSMUSG00000032011	Thy1	3.140161806	0.122582853	4.679009809	0	0
Lymphatic_ECs	ENSMUSG00000040329	Il7	2.173367095	0.089679323	4.599012684	0	0
Lymphatic_ECs	ENSMUSG00000053626	Tll1	7.128802956	0.294942303	4.595155179	0	0
Lymphatic_ECs	ENSMUSG00000026778	Prkcq	2.873706176	0.124808157	4.525128431	0	0
Lymphatic_ECs	ENSMUSG00000041482	Piezo2	3.985605202	0.182611969	4.447945578	0	0
Lymphatic_ECs	ENSMUSG00000039899	Fgl2	9.870236758	0.454495047	4.440748215	0	0
Lymphatic_ECs	ENSMUSG00000066113	Adamtsl1	7.295468931	0.374339685	4.284580806	0	0
Lymphatic_ECs	ENSMUSG00000030787	Lyve1	13.88912388	0.741619515	4.227132579	0	0
Lymphatic_ECs	ENSMUSG00000026435	Slc45a3	2.315682089	0.127037901	4.188106316	0	0
Lymphatic_ECs	ENSMUSG00000010175	Prox1	6.780727195	0.415725622	4.02773643	0	0
Lymphatic_ECs	ENSMUSG00000040254	Sema3d	6.27572254	0.412248181	3.928196538	0	0
Lymphatic_ECs	ENSMUSG00000041378	Cldn5	10.51524436	0.791846445	3.731117877	0	0
Lymphatic_ECs	ENSMUSG00000025597	Klhl4	5.040327943	0.363070386	3.79519644	8.22E-275	2.51E-270
Lymphatic_ECs	ENSMUSG00000019890	Nts	2.036391065	0.094154148	4.434846182	1.31E-246	3.98E-242
Lymphatic_ECs	ENSMUSG00000032380	Dapk2	3.447674277	0.286282778	3.590110692	1.25E-243	3.82E-239
Lymphatic_ECs	ENSMUSG00000047793	Sned1	4.829157841	0.378667222	3.67276917	2.57E-240	7.83E-236
Lymphatic_ECs	ENSMUSG00000021719	Rgs7bp	2.408066171	0.151332535	3.992080945	1.38E-212	4.21E-208
Lymphatic_ECs	ENSMUSG00000057440	Mpp7	6.971825104	0.630605629	3.466726424	4.32E-209	1.32E-204
Lymphatic_ECs	ENSMUSG00000063564	Col23a1	4.00212813	0.306380303	3.7073719	3.16E-205	9.65E-201
Lymphatic_ECs	ENSMUSG00000020902	Ntn1	9.433692884	1.072286631	3.137132033	1.62E-204	4.95E-200
Lymphatic_ECs	ENSMUSG00000038296	Galnt18	14.83583035	1.89507053	2.968762227	2.04E-201	6.23E-197
Lymphatic_ECs	ENSMUSG00000066705	Fxyd6	3.737505755	0.33096927	3.497306625	1.65E-199	5.02E-195
Lymphatic_ECs	ENSMUSG00000055435	Maf	7.774486781	1.240979009	2.647268728	1.34E-197	4.08E-193
Lymphatic_ECs	ENSMUSG00000029053	Prkcz	1.518637693	0.097979385	3.954155674	1.43E-192	4.35E-188
Lymphatic_ECs	ENSMUSG00000031517	Gpm6a	6.030736569	1.485646543	2.0212433	1.78E-192	5.42E-188
Lymphatic_ECs	ENSMUSG00000016024	Lbp	3.477685016	0.326952663	3.410973588	1.63E-189	4.97E-185
Lymphatic_ECs	ENSMUSG00000039405	Prss23	4.90499704	0.462778493	3.405858541	7.35E-185	2.24E-180
Lymphatic_ECs	ENSMUSG00000038725	Pkhd1l1	5.556415254	1.052602695	2.400193429	1.28E-170	3.91E-166
Lymphatic_ECs	ENSMUSG00000073599	Ecscr	5.358905032	0.745144944	2.846345262	4.57E-165	1.39E-160
Lymphatic_ECs	ENSMUSG00000027217	Tspan18	5.360421663	0.667117296	3.00633414	1.83E-159	5.59E-155
Lymphatic_ECs	ENSMUSG00000030551	Nr2f2	5.426309903	0.847195189	2.679205143	5.86E-156	1.79E-151
Lymphatic_ECs	ENSMUSG00000038816	Ctnnal1	2.448925655	0.285447296	3.100852674	1.73E-154	5.27E-150
Lymphatic_ECs	ENSMUSG00000039706	Ldb2	10.88675874	2.05001994	2.408864644	6.04E-145	1.84E-140
Lymphatic_ECs	ENSMUSG00000034684	Sema3f	1.779870127	0.173189372	3.361349671	4.83E-144	1.47E-139
Lymphatic_ECs	ENSMUSG00000020844	Nxn	12.13189348	2.075450536	2.547308283	2.82E-143	8.59E-139
Lymphatic_ECs	ENSMUSG00000020044	Timp3	19.1774883	3.614136771	2.407690773	1.04E-142	3.18E-138
Lymphatic_ECs	ENSMUSG00000022246	Rai14	2.814512858	0.333037832	3.079127262	3.91E-142	1.19E-137
Lymphatic_ECs	ENSMUSG00000025969	Nrp2	12.47966943	1.998375744	2.642679944	2.61E-139	7.97E-135
Lymphatic_ECs	ENSMUSG00000061751	Kalrn	7.311741587	1.079716334	2.75956275	3.32E-138	1.01E-133
Lymphatic_ECs	ENSMUSG00000086040	Wipf3	2.875000726	0.294708132	3.286203545	4.01E-138	1.22E-133
Lymphatic_ECs	ENSMUSG00000042286	Stab1	6.545630756	1.449221191	2.175254414	8.46E-138	2.58E-133
Lymphatic_ECs	ENSMUSG00000035258	Abi3bp	8.39042704	1.379917238	2.604162498	1.48E-135	4.51E-131
Lymphatic_ECs	ENSMUSG00000039578	Ccser1	2.615388569	0.332926861	2.973748124	9.10E-135	2.77E-130
Lymphatic_ECs	ENSMUSG00000047446	Arl4a	3.685630856	0.589935446	2.643282579	1.59E-131	4.85E-127
Lymphatic_ECs	ENSMUSG00000037095	Lrg1	2.1473052	0.185644032	3.531916414	7.86E-131	2.39E-126
Lymphatic_ECs	ENSMUSG00000019647	Sema6a	11.2052244	2.354053536	2.250952505	1.21E-123	3.69E-119
Lymphatic_ECs	ENSMUSG00000038143	Stox2	13.67523457	2.758853845	2.309424646	2.07E-123	6.30E-119
Lymphatic_ECs	ENSMUSG00000036053	Fmnl2	9.153556348	1.640876839	2.479865412	2.42E-122	7.39E-118
Lymphatic_ECs	ENSMUSG00000053641	Dennd4a	6.933009811	1.059177838	2.710536962	7.40E-121	2.26E-116
Lymphatic_ECs	ENSMUSG00000001435	Col18a1	2.292438476	0.222507405	3.364957764	2.94E-116	8.95E-112
Lymphatic_ECs	ENSMUSG00000020961	Ston2	3.042542822	0.383893381	2.986499978	2.96E-116	9.02E-112
Lymphatic_ECs	ENSMUSG00000003617	Cp	15.02819841	3.225617828	2.220024646	1.76E-115	5.38E-111
Lymphatic_ECs	ENSMUSG00000016487	Ppfibp1	6.56312565	1.232374125	2.412942757	5.88E-115	1.79E-110
Lymphatic_ECs	ENSMUSG00000026185	Igfbp5	23.57800453	2.777082743	3.085799556	5.45E-114	1.66E-109
Lymphatic_ECs	ENSMUSG00000024998	Plce1	7.873411071	1.69165239	2.218555657	1.43E-112	4.36E-108
Lymphatic_ECs	ENSMUSG00000032289	Thsd4	3.769147425	0.795778566	2.243799278	1.89E-112	5.76E-108
Lymphatic_ECs	ENSMUSG00000047368	Abhd17b	4.780023936	0.706484057	2.758288933	8.17E-111	2.49E-106
Lymphatic_ECs	ENSMUSG00000032186	Tmod2	1.525760202	0.173559786	3.136023619	1.31E-110	3.98E-106
Lymphatic_ECs	ENSMUSG00000090698	Apold1	1.584620784	0.202493687	2.968188797	3.60E-109	1.10E-104
Lymphatic_ECs	ENSMUSG00000054555	Adam12	2.441830388	0.195887354	3.639866827	1.59E-108	4.84E-104
Lymphatic_ECs	ENSMUSG00000039115	Itga9	7.056793446	1.347508983	2.388717893	1.09E-106	3.33E-102
Lymphatic_ECs	ENSMUSG00000025558	Dock9	10.29692187	2.567485208	2.003785257	2.72E-103	8.30E-99
Lymphatic_ECs	ENSMUSG00000030257	Srgap3	1.541529797	0.19620512	2.973928184	1.71E-100	5.20E-96
Lymphatic_ECs	ENSMUSG00000018986	Slfn3	1.431133122	0.210604203	2.764551745	5.33E-100	1.62E-95
Lymphatic_ECs	ENSMUSG00000005125	Ndrg1	2.459656761	0.476280001	2.36857513	6.43E-100	1.96E-95
Lymphatic_ECs	ENSMUSG00000032440	Tgfbr2	8.287329512	2.050369862	2.015023108	1.19E-98	3.63E-94
Lymphatic_ECs	ENSMUSG00000029126	Nsg1	1.699629844	0.195253964	3.121796836	4.62E-98	1.41E-93
Lymphatic_ECs	ENSMUSG00000020021	Fgd6	2.28219368	0.39011327	2.548456252	7.38E-96	2.25E-91
Lymphatic_ECs	ENSMUSG00000031681	Smad1	4.109837375	0.814139702	2.335733028	7.89E-96	2.40E-91
Lymphatic_ECs	ENSMUSG00000019194	Scn1b	1.64846141	0.241304645	2.772192523	2.06E-94	6.27E-90
Lymphatic_ECs	ENSMUSG00000026594	Ralgps2	2.359183809	0.425071805	2.472509352	9.09E-93	2.77E-88
Lymphatic_ECs	ENSMUSG00000062300	Nectin2	1.47191748	0.193449769	2.927665884	1.77E-92	5.39E-88
Lymphatic_ECs	ENSMUSG00000022770	Dlg1	9.46659194	1.961297915	2.271036442	1.00E-88	3.06E-84
Lymphatic_ECs	ENSMUSG00000028944	Prkag2	4.935128008	0.825388404	2.57994243	4.43E-86	1.35E-81
Lymphatic_ECs	ENSMUSG00000029095	Ablim2	1.6960783	0.200290133	3.082039517	5.33E-86	1.63E-81
Lymphatic_ECs	ENSMUSG00000028713	Cyp4b1	2.679239356	0.511485845	2.389057253	3.96E-83	1.21E-78
Lymphatic_ECs	ENSMUSG00000059602	Syn3	3.967110881	0.904239113	2.133312494	2.13E-80	6.49E-76
Lymphatic_ECs	ENSMUSG00000074782	4833422C13Rik	1.707897385	0.352941151	2.274721742	2.19E-80	6.68E-76
Lymphatic_ECs	ENSMUSG00000028583	Pdpn	1.799185962	0.299076159	2.588759494	1.35E-75	4.12E-71
Lymphatic_ECs	ENSMUSG00000026321	Tnfrsf11a	1.6884455	0.325832931	2.373491286	2.65E-74	8.07E-70
Lymphatic_ECs	ENSMUSG00000032766	Gng11	6.984422322	1.745630543	2.000392546	1.04E-72	3.17E-68
Lymphatic_ECs	ENSMUSG00000045333	Zfp423	2.420274009	0.446219763	2.439344074	3.29E-72	1.00E-67
Lymphatic_ECs	ENSMUSG00000022305	Lrp12	1.329785142	0.194967359	2.769888646	7.29E-71	2.22E-66
Lymphatic_ECs	ENSMUSG00000009681	Bcr	2.174547376	0.457988739	2.247331109	9.18E-71	2.80E-66
Lymphatic_ECs	ENSMUSG00000032437	Stt3b	4.399118935	0.998761664	2.139002255	1.65E-70	5.03E-66
Lymphatic_ECs	ENSMUSG00000057751	Megf6	1.396757476	0.245720615	2.506990741	3.02E-68	9.19E-64
Lymphatic_ECs	ENSMUSG00000020092	Pald1	1.701079977	0.324320839	2.390957342	5.32E-67	1.62E-62
Lymphatic_ECs	ENSMUSG00000022297	Fzd6	2.054707875	0.477674253	2.104834275	5.89E-54	1.80E-49
Lymphatic_ECs	ENSMUSG00000079481	Nhsl2	2.019780334	0.478237858	2.078398153	5.40E-52	1.65E-47
Lymphatic_ECs	ENSMUSG00000039458	Mtmr12	1.821683194	0.428015285	2.08953786	1.09E-51	3.33E-47
Lymphatic_ECs	ENSMUSG00000071984	Fndc1	3.874139105	0.9282373	2.06131018	9.33E-48	2.84E-43
Lymphatic_ECs	ENSMUSG00000098557	Kctd12	1.597228641	0.345549839	2.208605137	4.50E-47	1.37E-42
Lymphatic_ECs	ENSMUSG00000052942	Glis3	3.479861916	0.674972895	2.366128586	4.63E-46	1.41E-41
Lymphatic_ECs	ENSMUSG00000031480	Thsd1	1.347527135	0.331055498	2.025169329	2.73E-45	8.33E-41
macrophages	ENSMUSG00000114483	Gm49144	2.251164255	0.008928036	7.978112805	0	0
macrophages	ENSMUSG00000101389	Ms4a4a	2.55007363	0.015100379	7.399810372	0	0
macrophages	ENSMUSG00000021322	Aoah	5.855792158	0.044429153	7.042213901	0	0
macrophages	ENSMUSG00000004730	Adgre1	7.305714111	0.063673477	6.842188944	0	0
macrophages	ENSMUSG00000039109	F13a1	31.84293227	0.282678454	6.815667457	0	0
macrophages	ENSMUSG00000045404	Kcnk13	2.240759155	0.019902889	6.814865909	0	0
macrophages	ENSMUSG00000078122	F630028O10Rik	4.684456099	0.04304066	6.766037529	0	0
macrophages	ENSMUSG00000044583	Tlr7	1.494321317	0.013750602	6.7638518	0	0
macrophages	ENSMUSG00000044206	Vsig4	2.139185678	0.019733736	6.760253815	0	0
macrophages	ENSMUSG00000008845	Cd163	8.625219445	0.080757817	6.738815445	0	0
macrophages	ENSMUSG00000055541	Lair1	1.883386218	0.018159016	6.696499058	0	0
macrophages	ENSMUSG00000049130	C5ar1	2.517957182	0.024749282	6.668723265	0	0
macrophages	ENSMUSG00000026712	Mrc1	25.43407861	0.262032887	6.600871127	0	0
macrophages	ENSMUSG00000015852	Fcrls	2.659724151	0.029350751	6.50173538	0	0
macrophages	ENSMUSG00000021720	Rnf180	2.046054187	0.022626515	6.498686149	0	0
macrophages	ENSMUSG00000024679	Ms4a6d	2.039903887	0.022798903	6.483392986	0	0
macrophages	ENSMUSG00000043832	Clec4a3	1.732168359	0.019518496	6.47159344	0	0
macrophages	ENSMUSG00000022901	Cd86	2.417144723	0.028168825	6.423060666	0	0
macrophages	ENSMUSG00000024672	Ms4a7	3.700932271	0.043809356	6.400505919	0	0
macrophages	ENSMUSG00000040950	Mgl2	4.33154413	0.057935582	6.224287944	0	0
macrophages	ENSMUSG00000079227	Ccr5	2.34139489	0.031995311	6.193363955	0	0
macrophages	ENSMUSG00000032089	Il10ra	2.236340472	0.030725384	6.185564995	0	0
macrophages	ENSMUSG00000030223	Ptpro	2.861753934	0.040241308	6.152078625	0	0
macrophages	ENSMUSG00000024013	Fgd2	1.586956498	0.022617062	6.132707236	0	0
macrophages	ENSMUSG00000038642	Ctss	6.562695899	0.094799502	6.113265292	0	0
macrophages	ENSMUSG00000021423	Ly86	4.02477821	0.059178521	6.087691823	0	0
macrophages	ENSMUSG00000036896	C1qc	19.71304954	0.290917032	6.082399398	0	0
macrophages	ENSMUSG00000058818	Pirb	2.622663294	0.040317412	6.023485772	0	0
macrophages	ENSMUSG00000036887	C1qa	27.41266262	0.42151692	6.023108113	0	0
macrophages	ENSMUSG00000026656	Fcgr2b	3.275441333	0.050569538	6.017276905	0	0
macrophages	ENSMUSG00000015340	Cybb	3.303536528	0.051571126	6.001303938	0	0
macrophages	ENSMUSG00000049037	Clec4a1	1.58759129	0.025077658	5.984293096	0	0
macrophages	ENSMUSG00000024300	Myo1f	4.337100264	0.070237898	5.948337307	0	0
macrophages	ENSMUSG00000036905	C1qb	23.33038542	0.390024241	5.902502536	0	0
macrophages	ENSMUSG00000024677	Ms4a6b	3.929062884	0.066679592	5.880796171	0	0
macrophages	ENSMUSG00000052160	Pld4	2.073874859	0.037045994	5.806867478	0	0
macrophages	ENSMUSG00000059498	Fcgr3	2.965476692	0.053322578	5.797373701	0	0
macrophages	ENSMUSG00000025017	Pik3ap1	2.500943904	0.045359373	5.784928201	0	0
macrophages	ENSMUSG00000018774	Cd68	2.081955034	0.037777773	5.784257444	0	0
macrophages	ENSMUSG00000024621	Csf1r	8.570693165	0.157238448	5.768385959	0	0
macrophages	ENSMUSG00000069516	Lyz2	48.03742643	0.884406271	5.763305796	0	0
macrophages	ENSMUSG00000032725	Folr2	3.767484538	0.069498962	5.760466352	0	0
macrophages	ENSMUSG00000089647	Gm2245	3.42502029	0.064450443	5.731778449	0	0
macrophages	ENSMUSG00000048779	P2ry6	3.798103139	0.072988097	5.70147406	0	0
macrophages	ENSMUSG00000022148	Fyb	7.787015555	0.150623685	5.692049952	0	0
macrophages	ENSMUSG00000018008	Cyth4	2.800091314	0.054464654	5.684009806	0	0
macrophages	ENSMUSG00000097705	Gm26740	5.456869868	0.108126326	5.657283914	0	0
macrophages	ENSMUSG00000002111	Spi1	1.97014745	0.04025934	5.612836289	0	0
macrophages	ENSMUSG00000040552	C3ar1	2.050879912	0.04198905	5.610086046	0	0
macrophages	ENSMUSG00000022952	Runx1	9.074165363	0.189210006	5.583704659	0	0
macrophages	ENSMUSG00000025044	Msr1	1.660846434	0.034893154	5.57283087	0	0
macrophages	ENSMUSG00000038147	Cd84	2.515768495	0.052982687	5.569334356	0	0
macrophages	ENSMUSG00000056069	Otulinl	2.507912672	0.054551139	5.522733977	0	0
macrophages	ENSMUSG00000060586	H2-Eb1	18.70620345	0.410509753	5.509956476	0	0
macrophages	ENSMUSG00000030560	Ctsc	11.88793494	0.267562341	5.473479241	0	0
macrophages	ENSMUSG00000052889	Prkcb	4.371568608	0.098722844	5.46862327	0	0
macrophages	ENSMUSG00000073421	H2-Ab1	18.33677134	0.41538645	5.464141672	0	0
macrophages	ENSMUSG00000031129	Slc9a9	18.5085372	0.423760788	5.448796973	0	0
macrophages	ENSMUSG00000036469	Marchf1	3.974429951	0.091531305	5.440338883	0	0
macrophages	ENSMUSG00000015355	Cd48	1.873903443	0.043447297	5.430636391	0	0
macrophages	ENSMUSG00000036594	H2-Aa	17.70626601	0.419529723	5.399343165	0	0
macrophages	ENSMUSG00000018927	Ccl6	4.483985856	0.10645551	5.396459205	0	0
macrophages	ENSMUSG00000024610	Cd74	43.86000383	1.05429515	5.378555226	0	0
macrophages	ENSMUSG00000029925	Tbxas1	4.129591645	0.102065092	5.338437699	0	0
macrophages	ENSMUSG00000022014	Epsti1	3.929607696	0.100487129	5.289302657	0	0
macrophages	ENSMUSG00000022488	Nckap1l	1.66965067	0.042876315	5.283221574	0	0
macrophages	ENSMUSG00000048865	Arhgap30	1.610784701	0.041534776	5.277300093	0	0
macrophages	ENSMUSG00000058715	Fcer1g	5.552138682	0.147946614	5.229895024	0	0
macrophages	ENSMUSG00000039191	Rbpj	34.29462238	0.942869305	5.184780752	0	0
macrophages	ENSMUSG00000060063	Alox5ap	2.599359104	0.072050442	5.173004858	0	0
macrophages	ENSMUSG00000019122	Ccl9	1.727427113	0.050490566	5.09646717	0	0
macrophages	ENSMUSG00000070780	Rbm47	3.07806474	0.090057946	5.095026188	0	0
macrophages	ENSMUSG00000021596	Mctp1	19.92952236	0.59903502	5.056122977	0	0
macrophages	ENSMUSG00000051439	Cd14	1.620379428	0.048864469	5.051402049	0	0
macrophages	ENSMUSG00000037922	Bank1	5.340205228	0.163549318	5.029097541	0	0
macrophages	ENSMUSG00000026480	Ncf2	1.465826712	0.048862763	4.906835313	0	0
macrophages	ENSMUSG00000034652	Cd300a	2.102140784	0.070119894	4.905891673	0	0
macrophages	ENSMUSG00000035697	Arhgap45	4.350901306	0.146018854	4.897087725	0	0
macrophages	ENSMUSG00000028581	Laptm5	4.381292162	0.150946436	4.859247825	0	0
macrophages	ENSMUSG00000104710	Gm31243	2.88944171	0.100245789	4.849177219	0	0
macrophages	ENSMUSG00000018654	Ikzf1	2.794078836	0.099044493	4.818152154	0	0
macrophages	ENSMUSG00000001128	Cfp	1.610213103	0.05719757	4.815153965	0	0
macrophages	ENSMUSG00000060131	Atp8b4	1.857203611	0.066150845	4.811228596	0	0
macrophages	ENSMUSG00000029373	Pf4	10.14960836	0.366777249	4.790376099	0	0
macrophages	ENSMUSG00000030579	Tyrobp	5.832980321	0.21549414	4.758512667	0	0
macrophages	ENSMUSG00000069911	Insyn2b	1.692058293	0.06274869	4.753050113	0	0
macrophages	ENSMUSG00000052085	Dock8	6.801938694	0.253426462	4.746306923	0	0
macrophages	ENSMUSG00000025150	Cbr2	1.768052211	0.065890998	4.74593568	0	0
macrophages	ENSMUSG00000044350	Lacc1	2.090089681	0.078652169	4.73193448	0	0
macrophages	ENSMUSG00000079419	Ms4a6c	4.450442835	0.16792466	4.728062879	0	0
macrophages	ENSMUSG00000020143	Dock2	5.422304754	0.207577345	4.707185301	0	0
macrophages	ENSMUSG00000029919	Hpgds	2.258455438	0.087304963	4.693128967	0	0
macrophages	ENSMUSG00000026395	Ptprc	8.760766867	0.340119661	4.686942849	0	0
macrophages	ENSMUSG00000026321	Tnfrsf11a	2.247143889	0.087732143	4.678843181	0	0
macrophages	ENSMUSG00000021998	Lcp1	5.014327363	0.196480167	4.673600588	0	0
macrophages	ENSMUSG00000059326	Csf2ra	1.776739956	0.069864672	4.668525611	0	0
macrophages	ENSMUSG00000026648	Dclre1c	4.333580202	0.173795021	4.640100749	0	0
macrophages	ENSMUSG00000023913	Pla2g7	3.430211129	0.142900007	4.585219484	0	0
macrophages	ENSMUSG00000063506	Arhgap22	2.813188708	0.126707943	4.472627456	0	0
macrophages	ENSMUSG00000021676	Iqgap2	3.468557876	0.157062642	4.464923983	0	0
macrophages	ENSMUSG00000052384	Nrros	5.565419757	0.255757386	4.443642696	0	0
macrophages	ENSMUSG00000069792	Wfdc17	2.799032435	0.135904704	4.364260908	0	0
macrophages	ENSMUSG00000049744	Arhgap15	11.90325424	0.591050292	4.331931344	0	0
macrophages	ENSMUSG00000084796	Mir142hg	2.359177325	0.1224317	4.268234807	0	0
macrophages	ENSMUSG00000027009	Itga4	2.710872849	0.143506047	4.239574013	0	0
macrophages	ENSMUSG00000055435	Maf	7.971493146	0.433129896	4.201978323	0	0
macrophages	ENSMUSG00000034593	Myo5a	7.028519048	0.393642294	4.158263594	0	0
macrophages	ENSMUSG00000043004	Gng2	2.609685576	0.146566483	4.154248865	0	0
macrophages	ENSMUSG00000051506	Wdfy4	1.826552195	0.103172116	4.14599796	0	0
macrophages	ENSMUSG00000036908	Unc93b1	5.845245237	0.357085144	4.032923534	0	0
macrophages	ENSMUSG00000060216	Arrb2	1.446616273	0.08875077	4.026778841	0	0
macrophages	ENSMUSG00000021457	Syk	3.739204754	0.242833861	3.944689964	0	0
macrophages	ENSMUSG00000026288	Inpp5d	6.063639992	0.415018331	3.868937136	0	0
macrophages	ENSMUSG00000025429	Pstpip2	2.035525401	0.139671688	3.865289708	0	0
macrophages	ENSMUSG00000021190	Lgmn	4.475242712	0.313740844	3.834320667	0	0
macrophages	ENSMUSG00000026094	Stk17b	2.806407401	0.200895824	3.804204976	0	0
macrophages	ENSMUSG00000042129	Rassf4	2.345937002	0.171041004	3.77775014	0	0
macrophages	ENSMUSG00000027339	Rassf2	2.248439947	0.175192205	3.681913865	0	0
macrophages	ENSMUSG00000029468	P2rx7	2.296992773	0.183953959	3.642329689	0	0
macrophages	ENSMUSG00000029560	Snx8	1.606653118	0.129597594	3.631947641	0	0
macrophages	ENSMUSG00000022150	Dab2	12.5248584	1.042784648	3.58628114	0	0
macrophages	ENSMUSG00000074622	Mafb	2.674607906	0.223171989	3.583099541	0	0
macrophages	ENSMUSG00000038178	Slc43a2	2.061134425	0.174001002	3.566271082	0	0
macrophages	ENSMUSG00000038623	Tm6sf1	4.10777732	0.365818171	3.489159332	0	0
macrophages	ENSMUSG00000030671	Pde3b	3.842754143	0.344750058	3.478517977	0	0
macrophages	ENSMUSG00000073910	Mob3b	2.098259586	0.191313412	3.455183253	0	0
macrophages	ENSMUSG00000020102	Slc16a7	2.219339086	0.20457288	3.4394433	0	0
macrophages	ENSMUSG00000087475	4933406I18Rik	2.189035459	0.202788434	3.432248045	0	0
macrophages	ENSMUSG00000040613	Apobec1	3.447727284	0.322529773	3.418141412	0	0
macrophages	ENSMUSG00000042286	Stab1	7.442532204	0.719102269	3.371524691	0	0
macrophages	ENSMUSG00000045658	Pid1	29.25658311	2.891066605	3.339087535	0	0
macrophages	ENSMUSG00000025314	Ptprj	8.773692993	0.882126948	3.314126028	0	0
macrophages	ENSMUSG00000061132	Blnk	2.476564203	0.264676103	3.226040176	0	0
macrophages	ENSMUSG00000005087	Cd44	1.852444069	0.198042472	3.225548215	0	0
macrophages	ENSMUSG00000030787	Lyve1	4.273062047	0.462631641	3.20733442	0	0
macrophages	ENSMUSG00000063931	Pepd	1.931751928	0.215337609	3.165237622	0	0
macrophages	ENSMUSG00000028159	Dapp1	1.66107249	0.189738826	3.130028204	0	0
macrophages	ENSMUSG00000027947	Il6ra	2.993956193	0.344680985	3.118719494	0	0
macrophages	ENSMUSG00000029192	Tbc1d14	1.86355532	0.219027519	3.088873598	0	0
macrophages	ENSMUSG00000016756	Cmah	2.390151788	0.282889973	3.078789296	0	0
macrophages	ENSMUSG00000035493	Tgfbi	3.642027329	0.431606399	3.076953589	0	0
macrophages	ENSMUSG00000033066	Gas7	4.098156853	0.491614813	3.059374913	0	0
macrophages	ENSMUSG00000021948	Prkcd	1.662051294	0.201067628	3.047212174	0	0
macrophages	ENSMUSG00000026737	Pip4k2a	6.748657996	0.82089192	3.039336451	0	0
macrophages	ENSMUSG00000017754	Pltp	6.56244539	0.802756347	3.03119944	0	0
macrophages	ENSMUSG00000039497	Dse	3.480775776	0.434555752	3.001795696	0	0
macrophages	ENSMUSG00000037902	Sirpa	2.68853022	0.336534581	2.997991024	0	0
macrophages	ENSMUSG00000005142	Man2b1	3.586668896	0.460862732	2.960235556	0	0
macrophages	ENSMUSG00000078772	Gm12353	9.868325644	1.268363339	2.95983724	0	0
macrophages	ENSMUSG00000041362	Shtn1	2.003812434	0.259996398	2.946183932	0	0
macrophages	ENSMUSG00000032554	Trf	6.652810993	0.869065952	2.936426477	0	0
macrophages	ENSMUSG00000053580	Tanc2	10.22331165	1.372839323	2.896627919	0	0
macrophages	ENSMUSG00000032046	Abhd12	2.725856871	0.368997324	2.885027551	0	0
macrophages	ENSMUSG00000040855	Reps2	2.848970649	0.386211069	2.88297934	0	0
macrophages	ENSMUSG00000028497	Hacd4	2.039991096	0.276646546	2.882447036	0	0
macrophages	ENSMUSG00000047747	Rnf150	6.063977351	0.835135459	2.860182238	0	0
macrophages	ENSMUSG00000034265	Zdhhc14	5.402452302	0.746825509	2.854771318	0	0
macrophages	ENSMUSG00000030760	Acer3	4.736190803	0.660880208	2.841266507	0	0
macrophages	ENSMUSG00000022378	Fam49b	5.717564955	0.807219786	2.824367409	0	0
macrophages	ENSMUSG00000030064	Frmd4b	11.61542886	1.64402508	2.820738208	0	0
macrophages	ENSMUSG00000056124	B4galt6	1.563481727	0.223056779	2.809279457	0	0
macrophages	ENSMUSG00000092625	Gm20404	1.901639221	0.273344323	2.798452245	0	0
macrophages	ENSMUSG00000028385	Snx30	1.76600561	0.256033761	2.786083961	0	0
macrophages	ENSMUSG00000027506	Tpd52	1.651034426	0.241010425	2.776202747	0	0
macrophages	ENSMUSG00000038910	Plcl2	3.753090564	0.556752884	2.752970072	0	0
macrophages	ENSMUSG00000028708	Mknk1	1.469860713	0.224092381	2.713513945	0	0
macrophages	ENSMUSG00000004317	Clcn5	1.970438446	0.301188021	2.709780386	0	0
macrophages	ENSMUSG00000031214	Ophn1	5.672519507	0.880537162	2.687533868	0	0
macrophages	ENSMUSG00000032265	Tent5a	1.983501846	0.308309537	2.685598316	0	0
macrophages	ENSMUSG00000038168	P3h2	2.549078394	0.397721809	2.680144164	0	0
macrophages	ENSMUSG00000059182	Skap2	4.704954082	0.753771642	2.641981218	0	0
macrophages	ENSMUSG00000038608	Dock10	5.30840108	0.859231692	2.627158267	0	0
macrophages	ENSMUSG00000002985	Apoe	88.24069639	14.33105871	2.622298983	0	0
macrophages	ENSMUSG00000026872	Zeb2	25.17253295	4.110652473	2.614411081	0	0
macrophages	ENSMUSG00000041058	Wwp1	10.37334924	1.705665795	2.604474871	0	0
macrophages	ENSMUSG00000032690	Oas2	1.679747122	0.277527265	2.597542639	0	0
macrophages	ENSMUSG00000014361	Mertk	4.071140738	0.673281966	2.596150368	0	0
macrophages	ENSMUSG00000020101	Vsir	2.170699159	0.360930912	2.588365182	0	0
macrophages	ENSMUSG00000086507	Adap2os	2.901326869	0.482470005	2.588201683	0	0
macrophages	ENSMUSG00000116933	Atp5o	5.868823673	0.982531158	2.5784963	0	0
macrophages	ENSMUSG00000027423	Snx5	2.572122857	0.432091323	2.57355139	0	0
macrophages	ENSMUSG00000029217	Tec	1.834857668	0.310051379	2.565088942	0	0
macrophages	ENSMUSG00000023367	Tmem176a	2.979420622	0.505032916	2.560582488	0	0
macrophages	ENSMUSG00000072889	Nfxl1	1.848659938	0.314879672	2.553607338	0	0
macrophages	ENSMUSG00000073555	Gm4951	2.673440895	0.461924289	2.532969468	0	0
macrophages	ENSMUSG00000021939	Ctsb	10.20954884	1.798540145	2.505020847	0	0
macrophages	ENSMUSG00000061119	Prcp	2.324615913	0.410034192	2.503176242	0	0
macrophages	ENSMUSG00000034663	Bmp2k	2.380190491	0.422582847	2.493770926	0	0
macrophages	ENSMUSG00000064090	Vrk2	2.655345754	0.471710002	2.49292763	0	0
macrophages	ENSMUSG00000020709	Adap2	4.622276788	0.830820995	2.475994074	0	0
macrophages	ENSMUSG00000029810	Tmem176b	4.492370512	0.813828865	2.464679563	0	0
macrophages	ENSMUSG00000041836	Ptpre	1.9548767	0.359720543	2.442129158	0	0
macrophages	ENSMUSG00000041797	Abca9	6.623108121	1.246594217	2.409516485	0	0
macrophages	ENSMUSG00000061288	Taok3	3.772176618	0.712050313	2.405346137	0	0
macrophages	ENSMUSG00000022957	Itsn1	5.529179985	1.046183578	2.401929506	0	0
macrophages	ENSMUSG00000031613	Hpgd	3.121003292	0.598942482	2.38152051	0	0
macrophages	ENSMUSG00000032846	Zswim6	7.001490445	1.349070655	2.375696161	0	0
macrophages	ENSMUSG00000017760	Ctsa	2.385380069	0.461881665	2.368623971	0	0
macrophages	ENSMUSG00000034708	Grn	4.72927195	0.922384509	2.358177915	0	0
macrophages	ENSMUSG00000025232	Hexa	3.17203123	0.619750537	2.355647453	0	0
macrophages	ENSMUSG00000032020	Ubash3b	1.775904444	0.352663039	2.332191671	0	0
macrophages	ENSMUSG00000002957	Ap2a2	3.723970477	0.744318324	2.322849976	0	0
macrophages	ENSMUSG00000039087	Rreb1	7.595058297	1.554575337	2.288540505	0	0
macrophages	ENSMUSG00000056515	Rab31	3.000124135	0.614496709	2.287545007	0	0
macrophages	ENSMUSG00000034484	Snx2	3.83677043	0.790050243	2.279876136	0	0
macrophages	ENSMUSG00000030126	Tmcc1	12.52250035	2.608528007	2.263214824	0	0
macrophages	ENSMUSG00000015243	Abca1	4.569631172	0.961835451	2.248215719	0	0
macrophages	ENSMUSG00000051344	Plekhm3	2.454060068	0.522828151	2.230761833	0	0
macrophages	ENSMUSG00000071669	Snx29	3.917827072	0.848053267	2.20782693	0	0
macrophages	ENSMUSG00000075415	Fnbp1	5.619516389	1.224197483	2.198609672	0	0
macrophages	ENSMUSG00000019943	Atp2b1	9.203742231	2.026220829	2.183429163	0	0
macrophages	ENSMUSG00000040990	Sh3kbp1	3.419465543	0.753218703	2.182630122	0	0
macrophages	ENSMUSG00000070738	Dgkd	2.731993185	0.610680701	2.161463725	0	0
macrophages	ENSMUSG00000014547	Wdfy2	2.890204332	0.648093583	2.156897437	0	0
macrophages	ENSMUSG00000038872	Zfhx3	5.868727369	1.337277718	2.133748583	0	0
macrophages	ENSMUSG00000017561	Crlf3	2.473360737	0.56845668	2.121350355	0	0
macrophages	ENSMUSG00000042228	Lyn	6.769041868	1.561337409	2.116169299	0	0
macrophages	ENSMUSG00000022973	Synj1	2.692454964	0.62865999	2.098570361	0	0
macrophages	ENSMUSG00000036943	Rab8b	3.621580319	0.847296834	2.095679989	0	0
macrophages	ENSMUSG00000022353	Mtss1	4.461559604	1.047080544	2.091175691	0	0
macrophages	ENSMUSG00000032359	Ctsh	4.38953312	1.04135124	2.075610739	0	0
macrophages	ENSMUSG00000073490	Ifi207	3.515222054	0.86460127	2.023508966	0	0
macrophages	ENSMUSG00000034709	Ppp1r21	1.755133677	0.372968683	2.234454513	1.17E-299	3.58E-295
macrophages	ENSMUSG00000031659	Adcy7	1.59084555	0.295811479	2.427043836	1.50E-298	4.56E-294
macrophages	ENSMUSG00000026786	Apbb1ip	2.623516888	0.651260351	2.010195774	1.05E-296	3.19E-292
macrophages	ENSMUSG00000001741	Il16	1.571407903	0.31406576	2.322919149	6.57E-291	2.00E-286
macrophages	ENSMUSG00000064289	Tank	2.501843082	0.535048744	2.22524907	2.67E-277	8.13E-273
macrophages	ENSMUSG00000029470	P2rx4	1.909135565	0.415733738	2.199187814	7.96E-276	2.43E-271
macrophages	ENSMUSG00000037306	Man1c1	2.414970512	0.59827031	2.0131362	8.52E-262	2.60E-257
macrophages	ENSMUSG00000073489	Ifi204	1.898699204	0.41756579	2.184935944	7.64E-256	2.33E-251
macrophages	ENSMUSG00000020097	Sgpl1	1.47781818	0.319923312	2.207670756	1.29E-249	3.94E-245
macrophages	ENSMUSG00000039713	Plekhg5	2.11111454	0.429050914	2.298784091	4.91E-233	1.50E-228
macrophages	ENSMUSG00000027035	Cers6	1.662841418	0.382812883	2.118939301	4.82E-222	1.47E-217
macrophages	ENSMUSG00000024052	Lpin2	1.59860304	0.387510782	2.044503379	6.63E-214	2.02E-209
Monocytes	ENSMUSG00000060509	Xcr1	3.235865343	0.001276976	11.30720442	0	0
Monocytes	ENSMUSG00000022456	Septin3	1.894908831	0.00101542	10.86583582	0	0
Monocytes	ENSMUSG00000022659	Gcsam	1.36738286	0.001145187	10.22161824	0	0
Monocytes	ENSMUSG00000042817	Flt3	6.043881896	0.008321936	9.50434062	0	0
Monocytes	ENSMUSG00000110017	Gm45237	2.458796666	0.006037188	8.669859913	0	0
Monocytes	ENSMUSG00000005947	Itgae	4.32779393	0.012397536	8.447434554	0	0
Monocytes	ENSMUSG00000110399	Gm45238	1.317875837	0.004955525	8.054960745	0	0
Monocytes	ENSMUSG00000113669	Gm36723	9.913806978	0.040996097	7.917808806	0	0
Monocytes	ENSMUSG00000067610	Klri1	1.728681	0.007525426	7.843682614	0	0
Monocytes	ENSMUSG00000044156	Hepacam2	5.177433425	0.02702366	7.581870187	0	0
Monocytes	ENSMUSG00000019876	Pkib	4.693363301	0.028259564	7.37573914	0	0
Monocytes	ENSMUSG00000041538	H2-Ob	4.452337053	0.028427687	7.291122268	0	0
Monocytes	ENSMUSG00000048534	Jaml	2.591679405	0.016927995	7.258332384	0	0
Monocytes	ENSMUSG00000052013	Btla	7.210143609	0.052453382	7.102848385	0	0
Monocytes	ENSMUSG00000030468	Siglecg	1.516633412	0.011195358	7.081827908	0	0
Monocytes	ENSMUSG00000024798	Htr7	5.155038057	0.041286117	6.964182524	0	0
Monocytes	ENSMUSG00000021880	Rnase6	3.201193362	0.0259806	6.945031284	0	0
Monocytes	ENSMUSG00000020399	Havcr2	4.926823459	0.051002033	6.593959215	0	0
Monocytes	ENSMUSG00000001281	Itgb7	4.560592207	0.047384163	6.5886724	0	0
Monocytes	ENSMUSG00000039315	Clnk	4.645835869	0.049023184	6.566330192	0	0
Monocytes	ENSMUSG00000036526	Card11	3.216100888	0.038919116	6.368689922	0	0
Monocytes	ENSMUSG00000038179	Slamf7	4.415094066	0.057547585	6.261544977	0	0
Monocytes	ENSMUSG00000004709	Cd244a	3.179221015	0.046870753	6.083841539	0	0
Monocytes	ENSMUSG00000050921	P2ry10	1.506960025	0.01459672	6.689853162	2.54E-293	7.73E-289
Monocytes	ENSMUSG00000026832	Cytip	3.694424441	0.06469887	5.835465298	5.28E-271	1.61E-266
Monocytes	ENSMUSG00000036875	Dna2	2.796837344	0.045665465	5.936549015	5.44E-262	1.66E-257
Monocytes	ENSMUSG00000041673	Lrrc18	2.632770639	0.026221177	6.64970556	4.18E-252	1.27E-247
Monocytes	ENSMUSG00000027068	Dhrs9	1.108881449	0.010524426	6.71921979	6.44E-228	1.96E-223
Monocytes	ENSMUSG00000030789	Itgax	1.534713719	0.0157934	6.602503953	7.04E-219	2.15E-214
Monocytes	ENSMUSG00000001763	Tspan33	1.297579033	0.017334941	6.22599565	1.82E-206	5.54E-202
Monocytes	ENSMUSG00000002204	Napsa	2.053103816	0.035165152	5.867516329	1.22E-201	3.73E-197
Monocytes	ENSMUSG00000051506	Wdfy4	35.94596718	0.255717005	7.13513801	5.60E-188	1.71E-183
Monocytes	ENSMUSG00000116114	Gm35853	1.99229262	0.018502435	6.750570617	2.59E-178	7.90E-174
Monocytes	ENSMUSG00000046080	Clec9a	11.84960661	0.220302747	5.749207868	1.68E-177	5.11E-173
Monocytes	ENSMUSG00000037341	Slc9a7	2.689834536	0.063987117	5.393592158	1.52E-168	4.63E-164
Monocytes	ENSMUSG00000049103	Ccr2	6.395068918	0.280793413	4.509378907	3.80E-166	1.16E-161
Monocytes	ENSMUSG00000046805	Mpeg1	7.434027502	0.216112776	5.10428776	2.11E-162	6.43E-158
Monocytes	ENSMUSG00000042351	Grap2	2.380112255	0.066353087	5.164722216	1.71E-155	5.20E-151
Monocytes	ENSMUSG00000022504	Ciita	6.317391465	0.182692266	5.111841508	3.76E-149	1.14E-144
Monocytes	ENSMUSG00000030774	Pak1	4.510562934	0.132473539	5.089531379	2.48E-146	7.55E-142
Monocytes	ENSMUSG00000029410	Ppef2	2.380571221	0.026650232	6.481015898	2.48E-146	7.56E-142
Monocytes	ENSMUSG00000041515	Irf8	10.12870742	0.170701811	5.890827904	1.27E-145	3.87E-141
Monocytes	ENSMUSG00000070691	Runx3	1.394891594	0.027463402	5.66649885	4.83E-144	1.47E-139
Monocytes	ENSMUSG00000032076	Cadm1	19.05470366	0.350756767	5.763532425	9.73E-134	2.97E-129
Monocytes	ENSMUSG00000000682	Cd52	12.22008122	0.333198949	5.196726216	3.99E-131	1.21E-126
Monocytes	ENSMUSG00000000673	Haao	1.203474912	0.017132009	6.134367956	6.62E-131	2.02E-126
Monocytes	ENSMUSG00000028337	Coro2a	2.516145412	0.07146809	5.137772265	7.80E-129	2.38E-124
Monocytes	ENSMUSG00000021298	Gpr132	2.374739111	0.04993091	5.571692025	6.84E-125	2.09E-120
Monocytes	ENSMUSG00000079547	H2-DMb1	7.338662188	0.251233973	4.868413619	3.71E-124	1.13E-119
Monocytes	ENSMUSG00000022636	Alcam	25.27917439	0.49153378	5.684514968	7.90E-124	2.41E-119
Monocytes	ENSMUSG00000024013	Fgd2	5.827031319	0.199912282	4.865322052	1.74E-123	5.31E-119
Monocytes	ENSMUSG00000030149	Klrk1	1.285970655	0.045946006	4.806774468	3.04E-122	9.26E-118
Monocytes	ENSMUSG00000054702	Ap1s3	2.61746486	0.034380587	6.250432173	3.18E-122	9.68E-118
Monocytes	ENSMUSG00000030214	Plbd1	18.56943657	0.325248393	5.835244302	6.62E-122	2.02E-117
Monocytes	ENSMUSG00000029413	Naaa	12.61221642	0.241256954	5.708107492	6.93E-121	2.11E-116
Monocytes	ENSMUSG00000026630	Batf3	2.196458492	0.059573382	5.204367571	5.50E-117	1.68E-112
Monocytes	ENSMUSG00000053469	Tg	3.340035036	0.084953237	5.297050503	2.43E-116	7.41E-112
Monocytes	ENSMUSG00000031709	Tbc1d9	10.2913423	0.245803155	5.387783924	1.06E-112	3.22E-108
Monocytes	ENSMUSG00000030830	Itgal	1.039000879	0.043031715	4.593652737	2.67E-111	8.15E-107
Monocytes	ENSMUSG00000051735	Rinl	2.307285627	0.081082152	4.830668419	5.34E-108	1.63E-103
Monocytes	ENSMUSG00000084796	Mir142hg	9.768768012	0.373977847	4.707151911	2.14E-107	6.53E-103
Monocytes	ENSMUSG00000032985	5730522E02Rik	3.053256262	0.077185529	5.305874474	1.80E-105	5.48E-101
Monocytes	ENSMUSG00000060131	Atp8b4	7.379309011	0.268171106	4.782260021	3.02E-105	9.20E-101
Monocytes	ENSMUSG00000070390	Nlrp1b	5.83986698	0.190922827	4.934874	2.89E-99	8.81E-95
Monocytes	ENSMUSG00000034028	Cd226	1.560244177	0.081483418	4.259121515	4.22E-98	1.29E-93
Monocytes	ENSMUSG00000026980	Ly75	1.942992875	0.023828837	6.349428235	3.09E-95	9.41E-91
Monocytes	ENSMUSG00000002489	Tiam1	4.298522226	0.193901359	4.470445948	3.66E-91	1.12E-86
Monocytes	ENSMUSG00000005672	Kit	2.659608238	0.092527069	4.845194449	3.64E-87	1.11E-82
Monocytes	ENSMUSG00000022372	Sla	2.641270782	0.095554944	4.788757884	5.00E-87	1.52E-82
Monocytes	ENSMUSG00000106737	Gm42962	2.555088367	0.135458289	4.237452599	3.71E-86	1.13E-81
Monocytes	ENSMUSG00000030257	Srgap3	5.273291534	0.206532759	4.674261219	3.21E-82	9.78E-78
Monocytes	ENSMUSG00000000766	Oprm1	2.603836893	0.092950432	4.808033698	6.61E-82	2.02E-77
Monocytes	ENSMUSG00000064065	Ipcef1	2.740521105	0.067982936	5.333133757	1.29E-79	3.94E-75
Monocytes	ENSMUSG00000047415	Gpr68	1.832532121	0.05059755	5.178627139	1.11E-77	3.38E-73
Monocytes	ENSMUSG00000025017	Pik3ap1	4.141359585	0.330949384	3.645421982	1.06E-76	3.24E-72
Monocytes	ENSMUSG00000022901	Cd86	4.251599043	0.305665616	3.797979366	1.50E-76	4.58E-72
Monocytes	ENSMUSG00000036469	Marchf1	8.910217884	0.539719454	4.045179116	3.40E-74	1.03E-69
Monocytes	ENSMUSG00000030091	Nup210	1.222382601	0.037237933	5.036779107	4.45E-74	1.36E-69
Monocytes	ENSMUSG00000056069	Otulinl	4.869565226	0.338832817	3.845147454	1.12E-73	3.41E-69
Monocytes	ENSMUSG00000021624	Cd180	2.910798816	0.135454394	4.425536028	1.34E-73	4.08E-69
Monocytes	ENSMUSG00000049625	Tifab	1.172212247	0.039730821	4.882831392	4.18E-73	1.27E-68
Monocytes	ENSMUSG00000030589	Rasgrp4	2.522131557	0.122243412	4.366814913	1.46E-72	4.46E-68
Monocytes	ENSMUSG00000073421	H2-Ab1	57.56869571	2.460087441	4.548503026	3.74E-71	1.14E-66
Monocytes	ENSMUSG00000037649	H2-DMa	3.975049226	0.225218553	4.141575143	7.29E-71	2.22E-66
Monocytes	ENSMUSG00000029771	Irf5	3.418958384	0.134316253	4.669851073	1.79E-70	5.47E-66
Monocytes	ENSMUSG00000039578	Ccser1	7.942910425	0.351906601	4.496403253	3.95E-70	1.21E-65
Monocytes	ENSMUSG00000036594	H2-Aa	42.57786788	2.410663001	4.142601819	2.59E-69	7.89E-65
Monocytes	ENSMUSG00000060586	H2-Eb1	42.87858434	2.520981759	4.088199691	1.36E-68	4.14E-64
Monocytes	ENSMUSG00000041362	Shtn1	9.423481385	0.453720766	4.376383549	1.42E-68	4.32E-64
Monocytes	ENSMUSG00000026395	Ptprc	16.50447922	1.31638276	3.648206674	1.45E-68	4.41E-64
Monocytes	ENSMUSG00000078122	F630028O10Rik	8.436015418	0.581902213	3.857713094	2.73E-68	8.31E-64
Monocytes	ENSMUSG00000020901	Pik3r5	2.161756692	0.105455822	4.3574935	2.09E-67	6.37E-63
Monocytes	ENSMUSG00000090164	BC035044	1.443951816	0.049678296	4.861263109	2.94E-67	8.95E-63
Monocytes	ENSMUSG00000027009	Itga4	8.205985915	0.43660589	4.23227318	1.92E-66	5.86E-62
Monocytes	ENSMUSG00000052688	Rab7b	3.001007725	0.173937686	4.108804584	3.19E-66	9.73E-62
Monocytes	ENSMUSG00000029254	Stap1	1.295079066	0.097101794	3.737398419	2.05E-62	6.25E-58
Monocytes	ENSMUSG00000049744	Arhgap15	29.96027712	1.891433129	3.985499291	2.13E-61	6.50E-57
Monocytes	ENSMUSG00000044447	Dock5	3.164406141	0.266329944	3.570648231	3.05E-61	9.29E-57
Monocytes	ENSMUSG00000020143	Dock2	8.030853882	0.815332976	3.30009212	1.15E-58	3.49E-54
Monocytes	ENSMUSG00000029650	Slc46a3	2.41999676	0.123178818	4.296179023	1.20E-58	3.67E-54
Monocytes	ENSMUSG00000031639	Tlr3	6.981176259	0.288683377	4.595910193	2.46E-58	7.50E-54
Monocytes	ENSMUSG00000058152	Chsy3	4.609490658	0.328883236	3.808959964	5.95E-57	1.81E-52
Monocytes	ENSMUSG00000050022	Amz1	1.520098648	0.042393308	5.164184581	2.31E-56	7.05E-52
Monocytes	ENSMUSG00000028657	Ppt1	12.20067043	0.590020382	4.370051824	1.12E-55	3.42E-51
Monocytes	ENSMUSG00000019832	Rab32	1.289377721	0.050322516	4.679327086	1.22E-55	3.72E-51
Monocytes	ENSMUSG00000035000	Dpp4	9.725322011	0.826448559	3.556749091	3.16E-55	9.62E-51
Monocytes	ENSMUSG00000097705	Gm26740	8.221770499	0.73137127	3.490773242	6.63E-55	2.02E-50
Monocytes	ENSMUSG00000053063	Clec12a	1.967167868	0.160937307	3.611549373	1.25E-54	3.82E-50
Monocytes	ENSMUSG00000020437	Myo1g	1.775534376	0.083022883	4.418600449	1.44E-51	4.37E-47
Monocytes	ENSMUSG00000070780	Rbm47	6.321506422	0.43575802	3.858669272	2.63E-50	8.03E-46
Monocytes	ENSMUSG00000024300	Myo1f	7.841481593	0.565533674	3.793441431	5.98E-50	1.82E-45
Monocytes	ENSMUSG00000037860	Aim2	2.752981145	0.187419312	3.876653202	3.62E-49	1.10E-44
Monocytes	ENSMUSG00000027843	Ptpn22	2.166621691	0.131618253	4.041015787	3.91E-49	1.19E-44
Monocytes	ENSMUSG00000035021	Baz1a	5.905032132	0.432456341	3.771318512	1.10E-48	3.35E-44
Monocytes	ENSMUSG00000069911	Insyn2b	2.071148502	0.253271431	3.031674743	2.58E-48	7.86E-44
Monocytes	ENSMUSG00000024610	Cd74	98.63910368	5.994662602	4.040409228	8.07E-48	2.46E-43
Monocytes	ENSMUSG00000087518	Gm13561	2.720551912	0.210088418	3.694830823	2.97E-47	9.06E-43
Monocytes	ENSMUSG00000034330	Plcg2	2.951481403	0.251837807	3.550872462	1.10E-46	3.34E-42
Monocytes	ENSMUSG00000030055	Rab43	1.171427965	0.046513477	4.654475645	1.99E-46	6.05E-42
Monocytes	ENSMUSG00000048163	Selplg	2.251578768	0.163591105	3.782770735	7.66E-46	2.33E-41
Monocytes	ENSMUSG00000035697	Arhgap45	5.285156049	0.637779339	3.050816803	1.30E-45	3.95E-41
Monocytes	ENSMUSG00000040751	Lat2	1.091712168	0.051739472	4.399183403	1.66E-45	5.05E-41
Monocytes	ENSMUSG00000000594	Gm2a	7.335668569	0.396060569	4.211135476	1.81E-45	5.52E-41
Monocytes	ENSMUSG00000050379	Septin6	2.236362579	0.157175307	3.830707621	7.11E-45	2.17E-40
Monocytes	ENSMUSG00000003283	Hck	2.100290752	0.178625847	3.555576301	1.73E-44	5.26E-40
Monocytes	ENSMUSG00000042082	Arsb	9.867306972	0.487254355	4.339909406	2.81E-44	8.58E-40
Monocytes	ENSMUSG00000052085	Dock8	10.41200791	1.016143757	3.357071889	5.33E-43	1.63E-38
Monocytes	ENSMUSG00000036273	Lrrk2	9.169824362	0.728055853	3.654773064	9.44E-43	2.88E-38
Monocytes	ENSMUSG00000026288	Inpp5d	10.20307607	1.071434174	3.251389046	1.49E-42	4.55E-38
Monocytes	ENSMUSG00000003134	Tbc1d8	6.40127767	0.426586885	3.907448372	1.52E-42	4.64E-38
Monocytes	ENSMUSG00000039934	Gsap	3.380080335	0.269063782	3.651037424	1.61E-42	4.90E-38
Monocytes	ENSMUSG00000024965	Fermt3	2.918298617	0.178978107	4.027272484	1.00E-40	3.06E-36
Monocytes	ENSMUSG00000060275	Nrg2	2.739103849	0.217657241	3.653574042	1.06E-40	3.24E-36
Monocytes	ENSMUSG00000032020	Ubash3b	7.452795368	0.511324267	3.865471246	2.98E-40	9.10E-36
Monocytes	ENSMUSG00000020253	Ppm1m	2.159982137	0.168695986	3.67852183	3.74E-40	1.14E-35
Monocytes	ENSMUSG00000056091	St3gal5	4.581903745	0.421449643	3.442514986	1.67E-39	5.08E-35
Monocytes	ENSMUSG00000021596	Mctp1	23.23840357	2.861165399	3.021836157	1.67E-39	5.08E-35
Monocytes	ENSMUSG00000038608	Dock10	25.07364112	1.352287265	4.212697955	2.37E-39	7.22E-35
Monocytes	ENSMUSG00000000290	Itgb2	2.287792078	0.162262426	3.817555075	3.09E-39	9.41E-35
Monocytes	ENSMUSG00000057069	Ero1lb	2.63306115	0.191397373	3.782098092	4.16E-39	1.27E-34
Monocytes	ENSMUSG00000028064	Sema4a	2.031104757	0.182645804	3.475144134	6.06E-39	1.85E-34
Monocytes	ENSMUSG00000038168	P3h2	7.521033985	0.642794964	3.548500485	6.98E-39	2.13E-34
Monocytes	ENSMUSG00000059326	Csf2ra	3.826944431	0.267056354	3.840976836	7.29E-39	2.22E-34
Monocytes	ENSMUSG00000015355	Cd48	3.15155077	0.256253812	3.620416531	1.01E-38	3.09E-34
Monocytes	ENSMUSG00000018654	Ikzf1	4.301687977	0.412908319	3.381009494	1.27E-38	3.87E-34
Monocytes	ENSMUSG00000028581	Laptm5	6.220884772	0.644378011	3.271140616	1.68E-38	5.12E-34
Monocytes	ENSMUSG00000033082	Clec1a	9.684833439	0.754368399	3.68238609	1.94E-38	5.92E-34
Monocytes	ENSMUSG00000009376	Met	1.017433904	0.070390454	3.853411474	2.03E-37	6.18E-33
Monocytes	ENSMUSG00000048865	Arhgap30	2.894963432	0.223699469	3.693911388	2.61E-37	7.95E-33
Monocytes	ENSMUSG00000002111	Spi1	2.246995014	0.26618022	3.077521651	8.54E-37	2.60E-32
Monocytes	ENSMUSG00000073010	Gm5127	1.303025485	0.115108216	3.500802582	2.39E-36	7.29E-32
Monocytes	ENSMUSG00000029925	Tbxas1	4.976936604	0.573152829	3.118266226	1.30E-35	3.96E-31
Monocytes	ENSMUSG00000025198	Erlin1	2.543448545	0.25288897	3.330209886	1.59E-35	4.84E-31
Monocytes	ENSMUSG00000022952	Runx1	5.544579445	1.236298842	2.165050518	2.41E-35	7.36E-31
Monocytes	ENSMUSG00000022453	Naga	2.860062082	0.168315407	4.086807315	1.03E-34	3.15E-30
Monocytes	ENSMUSG00000112843	Gm46224	2.000091258	0.110102246	4.183150028	1.37E-34	4.19E-30
Monocytes	ENSMUSG00000021676	Iqgap2	5.52085779	0.542429251	3.347385555	1.74E-34	5.31E-30
Monocytes	ENSMUSG00000021087	Rtn1	3.884881199	0.269847044	3.847656694	2.34E-34	7.13E-30
Monocytes	ENSMUSG00000017664	Slc35c2	1.733311228	0.148861272	3.541490348	2.56E-34	7.79E-30
Monocytes	ENSMUSG00000042249	Grk3	3.151591381	0.205698692	3.937475968	3.72E-34	1.13E-29
Monocytes	ENSMUSG00000002668	Dennd1c	1.221055905	0.123429077	3.306375045	7.15E-34	2.18E-29
Monocytes	ENSMUSG00000051344	Plekhm3	7.061804666	0.742615749	3.249349099	7.52E-34	2.29E-29
Monocytes	ENSMUSG00000027901	Dennd2d	1.314666095	0.087322002	3.912207401	7.70E-34	2.35E-29
Monocytes	ENSMUSG00000005142	Man2b1	7.470002213	0.821793419	3.184260988	2.79E-33	8.51E-29
Monocytes	ENSMUSG00000036053	Fmnl2	17.8840259	1.71613801	3.381434058	6.44E-33	1.96E-28
Monocytes	ENSMUSG00000052160	Pld4	2.90617722	0.274701266	3.403187216	8.75E-33	2.67E-28
Monocytes	ENSMUSG00000022488	Nckap1l	2.946303463	0.231797979	3.667966137	9.15E-33	2.79E-28
Monocytes	ENSMUSG00000034116	Vav1	1.752811864	0.096251447	4.186719112	9.57E-33	2.92E-28
Monocytes	ENSMUSG00000026737	Pip4k2a	13.01738641	1.506950839	3.11073556	2.38E-32	7.26E-28
Monocytes	ENSMUSG00000036381	P2ry14	3.905811481	0.379901778	3.36192395	1.52E-31	4.62E-27
Monocytes	ENSMUSG00000030798	Cd37	1.777966703	0.193092326	3.20286557	3.71E-31	1.13E-26
Monocytes	ENSMUSG00000028926	Cdk14	25.19974841	2.325060531	3.438069149	2.47E-30	7.53E-26
Monocytes	ENSMUSG00000032462	Pik3cb	4.760149372	0.471613828	3.335328921	1.40E-29	4.25E-25
Monocytes	ENSMUSG00000039621	Prex1	2.001209479	0.292296177	2.775369324	1.82E-29	5.54E-25
Monocytes	ENSMUSG00000019866	Crybg1	1.577632295	0.16873513	3.224928714	1.82E-29	5.55E-25
Monocytes	ENSMUSG00000039899	Fgl2	4.035465038	0.573190115	2.815649301	1.84E-29	5.60E-25
Monocytes	ENSMUSG00000021720	Rnf180	2.12066599	0.259810783	3.028984198	3.75E-28	1.14E-23
Monocytes	ENSMUSG00000037697	Ddhd1	4.041927679	0.418035924	3.273344679	9.51E-28	2.90E-23
Monocytes	ENSMUSG00000073910	Mob3b	3.037834907	0.413581181	2.87680102	1.70E-27	5.20E-23
Monocytes	ENSMUSG00000030707	Coro1a	1.250676079	0.11218056	3.478813592	2.00E-27	6.10E-23
Monocytes	ENSMUSG00000021998	Lcp1	5.364359171	0.760973245	2.8174882	3.51E-27	1.07E-22
Monocytes	ENSMUSG00000038642	Ctss	5.031028079	0.855531433	2.555960474	1.36E-26	4.14E-22
Monocytes	ENSMUSG00000032352	Lrrc1	2.450443363	0.302197189	3.019480658	1.50E-26	4.58E-22
Monocytes	ENSMUSG00000029270	Dipk1a	3.280787227	0.362598673	3.17759648	1.71E-26	5.20E-22
Monocytes	ENSMUSG00000064090	Vrk2	5.005290703	0.724377239	2.788640741	4.02E-26	1.22E-21
Monocytes	ENSMUSG00000075415	Fnbp1	13.27303061	1.728530841	2.940879566	4.57E-26	1.39E-21
Monocytes	ENSMUSG00000027878	Notch2	6.373895921	1.012913207	2.653664901	4.92E-26	1.50E-21
Monocytes	ENSMUSG00000057506	Bloc1s2	2.965868072	0.304532263	3.283787442	1.05E-25	3.21E-21
Monocytes	ENSMUSG00000034792	Gna15	1.566102653	0.093060859	4.072860458	1.57E-25	4.79E-21
Monocytes	ENSMUSG00000059182	Skap2	11.30084232	1.207556219	3.226268047	1.58E-25	4.83E-21
Monocytes	ENSMUSG00000005087	Cd44	4.154381715	0.388714771	3.417849944	2.30E-25	7.02E-21
Monocytes	ENSMUSG00000031129	Slc9a9	12.09976255	2.553918843	2.24419415	2.41E-25	7.35E-21
Monocytes	ENSMUSG00000038543	BC028528	4.014812868	0.389015581	3.367432901	2.73E-25	8.31E-21
Monocytes	ENSMUSG00000043067	Dpy19l1	2.832682884	0.354035248	3.000204193	9.08E-25	2.77E-20
Monocytes	ENSMUSG00000052821	Cysltr1	1.418613495	0.196387226	2.85270858	6.72E-24	2.05E-19
Monocytes	ENSMUSG00000038267	Slc22a23	0.99163313	0.115807617	3.098076332	1.18E-23	3.58E-19
Monocytes	ENSMUSG00000022014	Epsti1	3.023078654	0.55085488	2.456274312	1.24E-23	3.77E-19
Monocytes	ENSMUSG00000044768	D1Ertd622e	1.188782547	0.142329077	3.062182504	2.73E-23	8.31E-19
Monocytes	ENSMUSG00000024789	Jak2	4.94198546	0.785322714	2.653733236	4.36E-23	1.33E-18
Monocytes	ENSMUSG00000021423	Ly86	2.152007478	0.526955056	2.029931266	5.07E-23	1.55E-18
Monocytes	ENSMUSG00000036908	Unc93b1	5.955764979	1.00053547	2.573514511	2.09E-22	6.36E-18
Monocytes	ENSMUSG00000060063	Alox5ap	2.769614137	0.368187222	2.91117353	1.03E-21	3.15E-17
Monocytes	ENSMUSG00000017417	Plxdc1	1.519918124	0.247521537	2.618367644	1.15E-21	3.49E-17
Monocytes	ENSMUSG00000028159	Dapp1	2.80896128	0.360618592	2.961491054	1.45E-21	4.42E-17
Monocytes	ENSMUSG00000027583	Zbtb46	5.901244961	1.200650441	2.297203162	1.58E-21	4.81E-17
Monocytes	ENSMUSG00000044456	Rin3	4.193712922	0.718720556	2.544725252	2.33E-21	7.12E-17
Monocytes	ENSMUSG00000039629	Strip2	2.009601838	0.258017861	2.961366845	2.69E-21	8.19E-17
Monocytes	ENSMUSG00000031662	Snx20	1.47521473	0.120173444	3.617734935	2.70E-21	8.22E-17
Monocytes	ENSMUSG00000039637	Coro7	2.071201022	0.291736602	2.827729277	4.39E-21	1.34E-16
Monocytes	ENSMUSG00000039936	Pik3cd	1.810502912	0.21751908	3.057176639	8.69E-21	2.65E-16
Monocytes	ENSMUSG00000004698	Hdac9	20.52218722	3.580847305	2.518811594	8.93E-21	2.72E-16
Monocytes	ENSMUSG00000026483	Fam129a	7.31344832	1.018171502	2.844571212	1.05E-20	3.20E-16
Monocytes	ENSMUSG00000027447	Cst3	133.0465117	14.26963437	3.220910412	1.27E-20	3.86E-16
Monocytes	ENSMUSG00000040747	Cd53	1.360749504	0.223047721	2.608977194	1.83E-20	5.59E-16
Monocytes	ENSMUSG00000019726	Lyst	8.549569455	1.153602365	2.889705742	2.03E-20	6.19E-16
Monocytes	ENSMUSG00000058099	Nfam1	1.351026392	0.152571986	3.146493861	2.34E-20	7.13E-16
Monocytes	ENSMUSG00000040616	Tmem51	1.672325745	0.146852676	3.509414436	3.31E-20	1.01E-15
Monocytes	ENSMUSG00000030583	Sipa1l3	2.897369294	0.421476569	2.781219243	3.43E-20	1.05E-15
Monocytes	ENSMUSG00000030263	Lrmp	1.213313651	0.154459579	2.973651295	3.44E-20	1.05E-15
Monocytes	ENSMUSG00000003348	Mob3a	1.327355521	0.109623745	3.597922604	4.27E-20	1.30E-15
Monocytes	ENSMUSG00000022378	Fam49b	7.065880566	1.381110278	2.355040844	4.73E-20	1.44E-15
Monocytes	ENSMUSG00000040350	Trim7	1.43142133	0.159225605	3.168304122	6.55E-20	2.00E-15
Monocytes	ENSMUSG00000040710	St8sia4	5.574155827	1.109292539	2.329113455	1.96E-19	5.98E-15
Monocytes	ENSMUSG00000037138	Aff3	4.658015078	0.577952712	3.010691949	2.19E-19	6.67E-15
Monocytes	ENSMUSG00000050335	Lgals3	1.031694209	0.12922954	2.997007634	4.58E-19	1.39E-14
Monocytes	ENSMUSG00000063810	Alms1	2.882733077	0.348108759	3.049827237	7.89E-19	2.40E-14
Monocytes	ENSMUSG00000053219	Raet1e	1.241803896	0.17003221	2.868557392	8.31E-19	2.53E-14
Monocytes	ENSMUSG00000036553	Sh3tc1	1.69180482	0.207411153	3.02799776	1.56E-18	4.77E-14
Monocytes	ENSMUSG00000001062	Vps9d1	1.636392176	0.234920426	2.800274478	1.73E-18	5.29E-14
Monocytes	ENSMUSG00000037321	Tap1	2.248364691	0.278995742	3.010561054	1.89E-18	5.77E-14
Monocytes	ENSMUSG00000027763	Mbnl1	25.77345445	5.26459861	2.291490472	1.92E-18	5.85E-14
Monocytes	ENSMUSG00000021306	Gpr137b	1.543411893	0.205042752	2.912126476	2.27E-18	6.91E-14
Monocytes	ENSMUSG00000034342	Cbl	5.099958039	0.944771714	2.4324477	3.17E-18	9.67E-14
Monocytes	ENSMUSG00000004661	Arid3b	1.384541976	0.146448968	3.240938857	3.32E-18	1.01E-13
Monocytes	ENSMUSG00000036918	Ttc7	2.43974975	0.293702124	3.05430757	7.85E-18	2.39E-13
Monocytes	ENSMUSG00000021725	Parp8	9.940066142	1.58498987	2.648781832	8.00E-18	2.44E-13
Monocytes	ENSMUSG00000020520	Galnt10	2.904107449	0.512583833	2.502234952	8.55E-18	2.61E-13
Monocytes	ENSMUSG00000015396	Cd83	1.420261583	0.189212463	2.908077648	1.04E-17	3.18E-13
Monocytes	ENSMUSG00000009585	Apobec3	3.099588694	0.598967149	2.371528004	1.20E-17	3.64E-13
Monocytes	ENSMUSG00000041607	Mbp	1.26670497	0.224138878	2.498615728	1.39E-17	4.24E-13
Monocytes	ENSMUSG00000032175	Tyk2	2.673210258	0.287884562	3.215010987	1.40E-17	4.26E-13
Monocytes	ENSMUSG00000043004	Gng2	2.253199556	0.435940706	2.369771266	1.83E-17	5.59E-13
Monocytes	ENSMUSG00000004207	Psap	28.0746261	4.96044473	2.500725432	1.87E-17	5.69E-13
Monocytes	ENSMUSG00000020644	Id2	2.328040534	0.364857482	2.673711234	2.97E-17	9.06E-13
Monocytes	ENSMUSG00000038055	Dexi	2.261459504	0.335066893	2.754733111	3.34E-17	1.02E-12
Monocytes	ENSMUSG00000030772	Dkk3	1.709840341	0.286425823	2.577628145	3.49E-17	1.06E-12
Monocytes	ENSMUSG00000026341	Actr3	8.098520917	1.431711259	2.499917878	4.23E-17	1.29E-12
Monocytes	ENSMUSG00000029098	Acox3	1.274605382	0.151699382	3.07076354	5.01E-17	1.53E-12
Monocytes	ENSMUSG00000033502	Cdc14a	3.12867333	0.623473684	2.32715046	5.22E-17	1.59E-12
Monocytes	ENSMUSG00000061288	Taok3	4.954027417	1.069202608	2.212066591	6.26E-17	1.91E-12
Monocytes	ENSMUSG00000025821	Zfp282	1.456711907	0.286013129	2.348562305	8.36E-17	2.55E-12
Monocytes	ENSMUSG00000030691	Fchsd2	11.52068184	1.953044599	2.560429305	1.41E-16	4.30E-12
Monocytes	ENSMUSG00000040820	Hlcs	2.919271531	0.533693534	2.451524968	2.39E-16	7.30E-12
Monocytes	ENSMUSG00000050919	Zfp366	4.140245831	0.948901497	2.125386194	2.73E-16	8.31E-12
Monocytes	ENSMUSG00000039145	Camk1d	41.73595983	9.531456866	2.1305223	2.77E-16	8.44E-12
Monocytes	ENSMUSG00000058881	Zfp516	2.210168891	0.35879599	2.622920945	3.95E-16	1.21E-11
Monocytes	ENSMUSG00000015745	Plekho1	3.529024775	0.775147043	2.186727642	4.25E-16	1.30E-11
Monocytes	ENSMUSG00000030047	Arhgap25	1.537140146	0.233265843	2.72020173	4.83E-16	1.47E-11
Monocytes	ENSMUSG00000042228	Lyn	9.756929856	2.16771843	2.170249883	4.99E-16	1.52E-11
Monocytes	ENSMUSG00000051212	Gpr183	2.010595915	0.207115067	3.279118746	5.37E-16	1.64E-11
Monocytes	ENSMUSG00000086016	1700084C06Rik	2.933677714	0.383911595	2.933864351	5.63E-16	1.72E-11
Monocytes	ENSMUSG00000018819	Lsp1	3.741576468	0.740961782	2.336175223	7.90E-16	2.41E-11
Monocytes	ENSMUSG00000028080	Lrba	7.796842758	1.659732978	2.231938883	8.42E-16	2.57E-11
Monocytes	ENSMUSG00000074151	Nlrc5	3.024287793	0.332354265	3.185801661	8.61E-16	2.62E-11
Monocytes	ENSMUSG00000031264	Btk	1.688304987	0.168147829	3.327773487	9.91E-16	3.02E-11
Monocytes	ENSMUSG00000018008	Cyth4	2.083729525	0.377492017	2.464649984	1.01E-15	3.07E-11
Monocytes	ENSMUSG00000048118	Arid4a	4.349270355	1.016530519	2.097119862	1.11E-15	3.40E-11
Monocytes	ENSMUSG00000038023	Atp6v0a2	2.992583402	0.372556849	3.005858963	1.20E-15	3.66E-11
Monocytes	ENSMUSG00000096727	Psmb9	1.781177422	0.293430698	2.601739513	1.20E-15	3.67E-11
Monocytes	ENSMUSG00000030231	Plekha5	6.691813197	1.483522152	2.173370703	1.83E-15	5.57E-11
Monocytes	ENSMUSG00000036246	Gmip	1.024142086	0.178941733	2.516854082	2.38E-15	7.25E-11
Monocytes	ENSMUSG00000022844	Pdia5	1.545339038	0.177567799	3.121481504	3.34E-15	1.02E-10
Monocytes	ENSMUSG00000006362	Cbfa2t3	4.546515851	1.002555595	2.181079141	4.24E-15	1.29E-10
Monocytes	ENSMUSG00000027630	Tbl1xr1	3.988423067	0.948000935	2.072858063	4.36E-15	1.33E-10
Monocytes	ENSMUSG00000030760	Acer3	5.572470239	1.137587778	2.292339137	4.47E-15	1.36E-10
Monocytes	ENSMUSG00000026786	Apbb1ip	4.690357398	0.879549821	2.414860654	5.78E-15	1.76E-10
Monocytes	ENSMUSG00000017057	Il13ra1	1.810079282	0.340336957	2.411017164	6.80E-15	2.07E-10
Monocytes	ENSMUSG00000021948	Prkcd	2.320736831	0.371444219	2.643365454	6.87E-15	2.10E-10
Monocytes	ENSMUSG00000038623	Tm6sf1	4.283752545	0.804391876	2.412904728	7.49E-15	2.28E-10
Monocytes	ENSMUSG00000029822	Osbpl3	1.991887584	0.318025513	2.646921816	8.41E-15	2.56E-10
Monocytes	ENSMUSG00000056476	Med12l	1.809938615	0.322087637	2.490415579	9.02E-15	2.75E-10
Monocytes	ENSMUSG00000036046	5031439G07Rik	2.154440634	0.349686449	2.623179548	9.83E-15	3.00E-10
Monocytes	ENSMUSG00000057672	Pkn1	3.421710661	0.695767324	2.29804094	1.09E-14	3.33E-10
Monocytes	ENSMUSG00000027522	Stx16	4.1558201	0.986334591	2.074984168	1.89E-14	5.76E-10
Monocytes	ENSMUSG00000026321	Tnfrsf11a	1.582965402	0.341936754	2.210828317	2.04E-14	6.20E-10
Monocytes	ENSMUSG00000039062	Anpep	1.940701937	0.269185403	2.849906474	2.56E-14	7.81E-10
Monocytes	ENSMUSG00000029687	Ezh2	2.339456713	0.32141567	2.863661364	2.67E-14	8.14E-10
Monocytes	ENSMUSG00000058818	Pirb	1.682291426	0.344521799	2.287760473	2.87E-14	8.74E-10
Monocytes	ENSMUSG00000001270	Ckb	2.417503147	0.464944953	2.378385942	4.26E-14	1.30E-09
Monocytes	ENSMUSG00000057596	Trim30d	2.149295378	0.355436444	2.596200247	5.99E-14	1.83E-09
Monocytes	ENSMUSG00000025915	Sgk3	3.584453602	0.823814338	2.121362077	6.35E-14	1.94E-09
Monocytes	ENSMUSG00000015882	Lcorl	4.843651517	1.162849491	2.058430693	9.91E-14	3.02E-09
Monocytes	ENSMUSG00000018209	Stk4	2.791389357	0.495227591	2.494819774	1.21E-13	3.70E-09
Monocytes	ENSMUSG00000047735	Samd9l	4.873799579	1.039274035	2.229470812	1.45E-13	4.41E-09
Monocytes	ENSMUSG00000056268	Dennd1b	9.430661417	1.736329268	2.441318399	2.94E-13	8.96E-09
Monocytes	ENSMUSG00000033319	Fem1c	1.907748116	0.351183879	2.441572177	2.94E-13	8.98E-09
Monocytes	ENSMUSG00000112437	Gm35188	7.220588286	1.653516079	2.126579308	3.98E-13	1.21E-08
Monocytes	ENSMUSG00000029174	Tbc1d1	3.90785747	0.965113694	2.017607036	4.20E-13	1.28E-08
Monocytes	ENSMUSG00000033685	Ucp2	2.117188351	0.402971072	2.393401439	4.59E-13	1.40E-08
Monocytes	ENSMUSG00000021451	Sema4d	1.709424502	0.259065563	2.722121545	5.78E-13	1.76E-08
Monocytes	ENSMUSG00000021115	Vrk1	1.622762072	0.245669019	2.723663653	8.10E-13	2.47E-08
Monocytes	ENSMUSG00000021830	Txndc16	2.277710641	0.397363404	2.519053563	8.55E-13	2.61E-08
Monocytes	ENSMUSG00000041836	Ptpre	3.074201919	0.545162787	2.495452936	1.12E-12	3.40E-08
Monocytes	ENSMUSG00000020021	Fgd6	2.373702103	0.412128853	2.525971515	1.79E-12	5.45E-08
Monocytes	ENSMUSG00000052949	Rnf157	1.032624873	0.173357703	2.574492409	1.87E-12	5.70E-08
Monocytes	ENSMUSG00000031827	Cotl1	1.271035579	0.187891465	2.75803298	2.15E-12	6.56E-08
Monocytes	ENSMUSG00000073409	H2-Q6	1.962853305	0.398842388	2.299061708	2.34E-12	7.12E-08
Monocytes	ENSMUSG00000091908	Gm17231	1.824733533	0.252679245	2.85230673	2.55E-12	7.79E-08
Monocytes	ENSMUSG00000038068	Rnf144b	1.155404384	0.247339126	2.223835494	2.62E-12	8.00E-08
Monocytes	ENSMUSG00000042404	Dennd4b	1.157042517	0.169642819	2.769869613	2.74E-12	8.36E-08
Monocytes	ENSMUSG00000098557	Kctd12	1.700296271	0.360052154	2.239508351	2.96E-12	9.02E-08
Monocytes	ENSMUSG00000097039	Pvt1	3.625103278	0.63593968	2.511060263	3.70E-12	1.13E-07
Monocytes	ENSMUSG00000048779	P2ry6	2.297225529	0.512022174	2.165614305	5.19E-12	1.58E-07
Monocytes	ENSMUSG00000028245	Nsmaf	4.267875305	0.835796298	2.352294752	5.42E-12	1.65E-07
Monocytes	ENSMUSG00000031093	Dock11	5.033742916	0.999337928	2.332587021	8.38E-12	2.55E-07
Monocytes	ENSMUSG00000015937	Macroh2a1	2.398585147	0.52928473	2.180067717	1.19E-11	3.64E-07
Monocytes	ENSMUSG00000032740	Ccdc88a	6.41367383	1.338409573	2.260631318	1.40E-11	4.28E-07
Monocytes	ENSMUSG00000040659	Efhd2	1.608060865	0.283282437	2.505008948	2.06E-11	6.28E-07
Monocytes	ENSMUSG00000022463	Srebf2	2.256903047	0.548272854	2.041378495	2.83E-11	8.62E-07
Monocytes	ENSMUSG00000027615	Hps3	3.083883417	0.66766662	2.207548407	2.89E-11	8.81E-07
Monocytes	ENSMUSG00000041852	Tcf20	3.898211538	0.878847474	2.149127672	3.14E-11	9.58E-07
Monocytes	ENSMUSG00000029772	Ahcyl2	3.698718634	0.678055059	2.447551225	3.24E-11	9.87E-07
Monocytes	ENSMUSG00000079056	Kcnip3	1.140162472	0.191713356	2.572216666	3.25E-11	9.91E-07
Monocytes	ENSMUSG00000035673	Sbno2	1.31872081	0.265119824	2.314422706	3.34E-11	1.02E-06
Monocytes	ENSMUSG00000061533	Cep128	1.972149481	0.397230304	2.311721314	4.27E-11	1.30E-06
Monocytes	ENSMUSG00000042423	Fbrs	1.458421873	0.27039234	2.431281919	4.29E-11	1.31E-06
Monocytes	ENSMUSG00000029213	Commd8	1.383393478	0.231919248	2.576517094	5.49E-11	1.67E-06
Monocytes	ENSMUSG00000014418	Hps5	1.269310261	0.273642626	2.213679871	5.64E-11	1.72E-06
Monocytes	ENSMUSG00000026833	Olfm1	1.59146456	0.209587353	2.924731463	7.54E-11	2.30E-06
Monocytes	ENSMUSG00000001700	Gramd3	1.949198743	0.391189861	2.316940315	9.61E-11	2.93E-06
Monocytes	ENSMUSG00000026827	Gpd2	1.765184355	0.293634572	2.587725121	9.84E-11	3.00E-06
Monocytes	ENSMUSG00000026773	Pfkfb3	1.553260019	0.295565783	2.393748195	1.59E-10	4.84E-06
Monocytes	ENSMUSG00000061175	Fnip2	4.909625835	0.891671701	2.461028544	1.64E-10	4.98E-06
Monocytes	ENSMUSG00000026126	Ptpn18	1.572173054	0.275296829	2.51370013	2.15E-10	6.54E-06
Monocytes	ENSMUSG00000042129	Rassf4	1.80378275	0.426884246	2.079108763	2.31E-10	7.04E-06
Monocytes	ENSMUSG00000027959	Sass6	1.098955708	0.212478889	2.370741825	2.51E-10	7.66E-06
Monocytes	ENSMUSG00000029313	Aff1	6.311954682	1.576178886	2.001655567	3.43E-10	1.04E-05
Monocytes	ENSMUSG00000097997	Gm27017	1.636016213	0.250456748	2.707553661	3.79E-10	1.16E-05
Monocytes	ENSMUSG00000031885	Cbfb	3.136767974	0.744289503	2.075343023	3.83E-10	1.17E-05
Monocytes	ENSMUSG00000040268	Plekha1	2.5745423	0.601042963	2.098775949	6.31E-10	1.92E-05
Monocytes	ENSMUSG00000038205	Prkab2	1.318570057	0.303136388	2.120935278	1.19E-09	3.62E-05
Monocytes	ENSMUSG00000039117	Taf4	1.108296831	0.199255228	2.475654843	1.29E-09	3.93E-05
Monocytes	ENSMUSG00000048277	Syngr2	1.834543049	0.375642634	2.287988042	2.26E-09	6.88E-05
Monocytes	ENSMUSG00000025178	Pi4k2a	1.286492524	0.263308194	2.288618749	2.58E-09	7.87E-05
Monocytes	ENSMUSG00000032089	Il10ra	1.212392359	0.290870967	2.059405459	3.14E-09	9.57E-05
Monocytes	ENSMUSG00000074785	Plxnc1	1.758211343	0.402178602	2.128200267	3.60E-09	0.000109606
Monocytes	ENSMUSG00000024084	Qpct	1.420691162	0.282468588	2.330430622	3.63E-09	0.00011079
Monocytes	ENSMUSG00000030403	Vasp	1.562097219	0.33143361	2.236692428	3.80E-09	0.000115781
Monocytes	ENSMUSG00000029179	Zcchc4	0.973298641	0.219652946	2.14765669	4.22E-09	0.000128617
Monocytes	ENSMUSG00000026767	Mindy3	2.076359228	0.502504312	2.046848184	5.47E-09	0.000166755
Monocytes	ENSMUSG00000037674	Rfx7	4.128198335	0.971679315	2.086960123	5.93E-09	0.00018084
Monocytes	ENSMUSG00000050721	Plekho2	1.40395633	0.275137821	2.351271687	5.94E-09	0.000181069
Monocytes	ENSMUSG00000020941	Map3k14	2.876133523	0.589280573	2.287104043	1.16E-08	0.000353741
Monocytes	ENSMUSG00000021733	Slc4a7	2.099704826	0.501038911	2.067191977	1.28E-08	0.000390434
Monocytes	ENSMUSG00000032640	Chsy1	1.709734983	0.354116691	2.271475968	1.32E-08	0.000403683
Monocytes	ENSMUSG00000021054	Sgpp1	1.33687982	0.332661623	2.006742432	1.37E-08	0.000418962
Monocytes	ENSMUSG00000049553	Polr1a	1.216300464	0.236857799	2.360406579	1.48E-08	0.000451102
Monocytes	ENSMUSG00000066152	Slc31a2	1.21559689	0.278883527	2.123930264	1.48E-08	0.000451398
Monocytes	ENSMUSG00000060090	Rp2	1.444340703	0.328904166	2.134671908	2.84E-08	0.000864827
Monocytes	ENSMUSG00000040537	Adam22	1.921446161	0.382403877	2.329023496	4.19E-08	0.001277514
Monocytes	ENSMUSG00000004665	Cnn2	1.439467234	0.319717206	2.170666658	6.38E-08	0.001945724
Monocytes	ENSMUSG00000020272	Stk10	2.401169938	0.58017905	2.049167405	6.67E-08	0.00203445
Monocytes	ENSMUSG00000047767	Atg16l2	2.964470751	0.714876622	2.052008384	7.12E-08	0.002170993
Monocytes	ENSMUSG00000024472	Dcp2	1.259269355	0.307824727	2.032405874	8.83E-08	0.002690334
Monocytes	ENSMUSG00000089911	Mfsd14a	1.464487697	0.312602363	2.227995484	9.87E-08	0.003007059
Monocytes	ENSMUSG00000032754	Slc8b1	1.607542496	0.340195178	2.24042228	3.22E-07	0.009819144
pericytes	ENSMUSG00000019906	Lin7a	5.401769212	0.054762439	6.624101485	0	0
pericytes	ENSMUSG00000092094	Zfp804b	4.043262487	0.045188255	6.483428224	0	0
pericytes	ENSMUSG00000027716	Trpc3	15.80789544	0.179898538	6.457318034	0	0
pericytes	ENSMUSG00000034912	Mdga2	9.817603846	0.117993345	6.378593561	0	0
pericytes	ENSMUSG00000017344	Vtn	9.016676871	0.117006681	6.267933001	0	0
pericytes	ENSMUSG00000030247	Kcnj8	16.298245	0.237749973	6.099127635	0	0
pericytes	ENSMUSG00000021684	Pde8b	10.39580149	0.152634246	6.08977849	0	0
pericytes	ENSMUSG00000030222	Rerg	4.974830081	0.075091416	6.049855439	0	0
pericytes	ENSMUSG00000024109	Nrxn1	12.04890292	0.200039076	5.912476138	0	0
pericytes	ENSMUSG00000031750	Il34	2.504433409	0.042642396	5.876051945	0	0
pericytes	ENSMUSG00000032911	Cspg4	5.42359448	0.106884583	5.66512363	0	0
pericytes	ENSMUSG00000030249	Abcc9	42.21229563	1.005384479	5.391844062	0	0
pericytes	ENSMUSG00000027834	Serpini1	8.657946708	0.207806054	5.380715327	0	0
pericytes	ENSMUSG00000038146	Notch3	12.10122053	0.29270253	5.369573539	0	0
pericytes	ENSMUSG00000012428	Steap4	10.58226792	0.284916756	5.214964569	0	0
pericytes	ENSMUSG00000038530	Rgs4	2.45409869	0.066943849	5.196097963	0	0
pericytes	ENSMUSG00000050666	Vstm4	3.637938372	0.10235876	5.151414629	0	0
pericytes	ENSMUSG00000042961	Egflam	4.697132846	0.134908787	5.121724171	0	0
pericytes	ENSMUSG00000057182	Scn3a	1.922551727	0.056599884	5.086079505	0	0
pericytes	ENSMUSG00000036655	Colec11	12.30026463	0.388099141	4.986120304	0	0
pericytes	ENSMUSG00000056755	Grm7	4.995577302	0.161215147	4.953592206	0	0
pericytes	ENSMUSG00000041696	Rasl12	2.825875646	0.092132158	4.938849368	0	0
pericytes	ENSMUSG00000020183	Cpm	2.918968931	0.096654477	4.91647848	0	0
pericytes	ENSMUSG00000009378	Slc16a12	1.81219556	0.063294621	4.839511933	0	0
pericytes	ENSMUSG00000024620	Pdgfrb	19.5319137	0.713280301	4.775220368	0	0
pericytes	ENSMUSG00000019326	Aoc3	1.968621612	0.074869874	4.716656705	0	0
pericytes	ENSMUSG00000031075	Ano1	6.411840629	0.260754836	4.61997265	0	0
pericytes	ENSMUSG00000020928	Higd1b	1.77490029	0.077116467	4.524555206	0	0
pericytes	ENSMUSG00000009876	Cox4i2	2.463346939	0.107477801	4.518509222	0	0
pericytes	ENSMUSG00000041329	Atp1b2	1.669003695	0.07489791	4.477917868	0	0
pericytes	ENSMUSG00000017417	Plxdc1	2.596744223	0.117923271	4.460783566	0	0
pericytes	ENSMUSG00000074782	4833422C13Rik	3.838723973	0.176551317	4.442467337	0	0
pericytes	ENSMUSG00000097324	Carmn	5.644864492	0.265654415	4.409316352	0	0
pericytes	ENSMUSG00000050587	Lrrc4c	2.541806967	0.123725134	4.36064396	0	0
pericytes	ENSMUSG00000053825	Ppfia2	4.662948352	0.228025608	4.353974694	0	0
pericytes	ENSMUSG00000042155	Klhl23	3.007203349	0.15593565	4.269399729	0	0
pericytes	ENSMUSG00000040260	Daam2	2.861173764	0.150182121	4.251822144	0	0
pericytes	ENSMUSG00000036381	P2ry14	3.696492941	0.199586349	4.211072205	0	0
pericytes	ENSMUSG00000026678	Rgs5	22.24949426	1.209713577	4.201035136	0	0
pericytes	ENSMUSG00000017412	Cacnb4	3.152319607	0.176588278	4.157952329	0	0
pericytes	ENSMUSG00000062257	Opcml	2.846340726	0.164449384	4.113392863	0	0
pericytes	ENSMUSG00000087143	A830082K12Rik	2.169868122	0.127993387	4.083466188	0	0
pericytes	ENSMUSG00000028005	Gucy1b1	6.744873103	0.4078186	4.04779182	0	0
pericytes	ENSMUSG00000005611	Mrvi1	3.872478315	0.239896183	4.012775054	0	0
pericytes	ENSMUSG00000028024	Enpep	2.355173796	0.148338835	3.988865273	0	0
pericytes	ENSMUSG00000024597	Slc12a2	7.412846756	0.476384996	3.959827806	0	0
pericytes	ENSMUSG00000032875	Arhgef17	3.58823163	0.232362332	3.948824905	0	0
pericytes	ENSMUSG00000039519	Cyp7b1	2.158779826	0.140114028	3.945542798	0	0
pericytes	ENSMUSG00000067586	S1pr3	4.572441267	0.31290011	3.869190567	0	0
pericytes	ENSMUSG00000050234	Gja4	1.849307947	0.127786613	3.855176875	0	0
pericytes	ENSMUSG00000060429	Sntb1	3.154557532	0.219794137	3.843212852	0	0
pericytes	ENSMUSG00000040280	Ndufa4l2	4.395504925	0.307665532	3.83659417	0	0
pericytes	ENSMUSG00000063873	Slc24a3	5.853962588	0.411795453	3.829413719	0	0
pericytes	ENSMUSG00000038349	Plcl1	19.99427523	1.428760689	3.80675079	0	0
pericytes	ENSMUSG00000031616	Ednra	4.282909857	0.326381008	3.713962299	0	0
pericytes	ENSMUSG00000037605	Adgrl3	9.858407995	0.761313838	3.694791483	0	0
pericytes	ENSMUSG00000056486	Chn1	4.876209659	0.378754061	3.686426897	0	0
pericytes	ENSMUSG00000025348	Itga7	2.042578174	0.159743131	3.676565497	0	0
pericytes	ENSMUSG00000041624	Gucy1a2	12.99456569	1.028096069	3.659861429	0	0
pericytes	ENSMUSG00000097305	Gm17276	2.900211214	0.232009787	3.6439004	0	0
pericytes	ENSMUSG00000034520	Gjc1	4.572693905	0.36767823	3.636528687	0	0
pericytes	ENSMUSG00000027750	Postn	6.682871439	0.541709481	3.624876875	0	0
pericytes	ENSMUSG00000018417	Myo1b	11.17687633	0.922567655	3.598718523	0	0
pericytes	ENSMUSG00000033910	Gucy1a1	6.561095648	0.550774661	3.574402659	0	0
pericytes	ENSMUSG00000040415	Dtx3	3.918495336	0.363900195	3.42868505	0	0
pericytes	ENSMUSG00000023915	Tnfrsf21	2.774624067	0.257871712	3.427566886	0	0
pericytes	ENSMUSG00000015222	Map2	2.3459186	0.223895622	3.389254732	0	0
pericytes	ENSMUSG00000036095	Dgkb	2.614516394	0.259192776	3.334446703	0	0
pericytes	ENSMUSG00000032135	Mcam	2.797409974	0.309918857	3.17412926	0	0
pericytes	ENSMUSG00000074813	Morrbid	6.551575102	0.727307275	3.171204882	0	0
pericytes	ENSMUSG00000028524	Sgip1	3.899285914	0.443397221	3.136538311	0	0
pericytes	ENSMUSG00000000359	Rem1	2.732162416	0.316657795	3.109046748	0	0
pericytes	ENSMUSG00000022836	Mylk	2.962090424	0.349815288	3.081950435	0	0
pericytes	ENSMUSG00000031523	Dlc1	73.23167462	9.222715742	2.989204249	0	0
pericytes	ENSMUSG00000029174	Tbc1d1	5.506278675	0.715333769	2.944389173	0	0
pericytes	ENSMUSG00000021360	Gcnt2	4.021617677	0.554957322	2.857327203	0	0
pericytes	ENSMUSG00000028967	Errfi1	10.2122863	1.411784837	2.854713753	0	0
pericytes	ENSMUSG00000027669	Gnb4	3.456534463	0.481812923	2.842781316	0	0
pericytes	ENSMUSG00000037999	Arap2	4.558033481	0.645516472	2.819885706	0	0
pericytes	ENSMUSG00000034842	Art3	8.648627414	1.226755869	2.817623014	0	0
pericytes	ENSMUSG00000030551	Nr2f2	4.571831796	0.702166088	2.702888099	0	0
pericytes	ENSMUSG00000022231	Sema5a	3.485061539	0.562655179	2.630861183	0	0
pericytes	ENSMUSG00000021388	Aspn	7.180239733	1.159295003	2.630784281	0	0
pericytes	ENSMUSG00000030605	Mfge8	6.275579512	1.014528334	2.628939532	0	0
pericytes	ENSMUSG00000050730	Arhgap42	4.360051996	0.794621859	2.456004955	0	0
pericytes	ENSMUSG00000042284	Itga1	9.184875663	1.737064277	2.402609052	0	0
pericytes	ENSMUSG00000034903	Cobll1	6.132702793	1.195254279	2.359205466	0	0
pericytes	ENSMUSG00000020709	Adap2	5.339837752	1.052991813	2.342301687	0	0
pericytes	ENSMUSG00000087201	Gm15261	9.473633031	1.869501394	2.341264242	0	0
pericytes	ENSMUSG00000013663	Pten	11.36917111	2.303382194	2.303301358	0	0
pericytes	ENSMUSG00000024998	Plce1	7.054137076	1.477147174	2.255656036	0	0
pericytes	ENSMUSG00000052920	Prkg1	44.59626777	9.416942629	2.243592332	0	0
pericytes	ENSMUSG00000019889	Ptprk	10.63976524	2.304050523	2.207222061	0	0
pericytes	ENSMUSG00000034751	Mast4	31.5576349	7.12995991	2.146023216	0	0
pericytes	ENSMUSG00000031355	Arhgap6	11.9777241	2.786387383	2.103886056	0	0
pericytes	ENSMUSG00000025239	Limd1	4.314123891	0.718198383	2.586613297	1.91E-305	5.82E-301
pericytes	ENSMUSG00000034738	Nostrin	3.728817666	0.644401111	2.532687367	3.29E-300	1.00E-295
pericytes	ENSMUSG00000022994	Adcy6	3.560696692	0.595485054	2.580022345	2.68E-299	8.18E-295
pericytes	ENSMUSG00000034656	Cacna1a	2.779839513	0.387338148	2.843336092	6.58E-292	2.00E-287
pericytes	ENSMUSG00000054580	Pla2r1	2.510736348	0.356444018	2.816363124	4.92E-280	1.50E-275
pericytes	ENSMUSG00000051323	Pcdh19	4.316863342	0.828020857	2.382244409	1.96E-275	5.96E-271
pericytes	ENSMUSG00000086507	Adap2os	3.186857801	0.633855229	2.329909372	1.30E-263	3.96E-259
pericytes	ENSMUSG00000052188	Gm14964	2.188436399	0.302734086	2.853777428	5.65E-252	1.72E-247
pericytes	ENSMUSG00000000392	Fap	3.199946594	0.640247842	2.321345437	7.24E-252	2.21E-247
pericytes	ENSMUSG00000032946	Rasgrp2	2.499837799	0.417404355	2.58231693	3.05E-239	9.29E-235
pericytes	ENSMUSG00000020486	Septin4	2.764765761	0.545688639	2.341007344	3.13E-234	9.53E-230
pericytes	ENSMUSG00000053965	Pde5a	1.649759941	0.219392354	2.91067096	3.14E-226	9.56E-222
pericytes	ENSMUSG00000032744	Heyl	1.985971418	0.330012469	2.58925242	7.60E-226	2.32E-221
pericytes	ENSMUSG00000042331	Specc1	1.986043005	0.356477623	2.478013442	2.14E-210	6.52E-206
pericytes	ENSMUSG00000020810	Cygb	3.827143049	0.915397621	2.063797378	8.99E-206	2.74E-201
pericytes	ENSMUSG00000020601	Trib2	2.055235146	0.370421582	2.472063406	2.97E-188	9.05E-184
pericytes	ENSMUSG00000038831	Ralgps1	1.602834675	0.240624369	2.73577096	3.75E-186	1.14E-181
pericytes	ENSMUSG00000028073	Pear1	2.01767544	0.376310512	2.422698627	4.93E-182	1.50E-177
pericytes	ENSMUSG00000062098	Btbd3	2.450497813	0.491482837	2.317861918	1.63E-181	4.98E-177
pericytes	ENSMUSG00000004105	Angptl2	2.796102474	0.656696994	2.090117478	1.79E-168	5.46E-164
pericytes	ENSMUSG00000052609	Plekhg3	2.145940156	0.458195603	2.227574326	2.63E-158	8.02E-154
pericytes	ENSMUSG00000027276	Jag1	2.035739059	0.436754599	2.22065785	3.92E-150	1.20E-145
Schwann_cells	ENSMUSG00000024366	Gfra3	5.069314551	0.000722259	12.77698768	0	0
Schwann_cells	ENSMUSG00000047976	Kcna1	11.46193167	0.005180664	11.11142543	0	0
Schwann_cells	ENSMUSG00000038077	Kcna6	4.250803014	0.002929937	10.50264987	0	0
Schwann_cells	ENSMUSG00000045871	Slitrk6	4.00418434	0.002864627	10.4489453	0	0
Schwann_cells	ENSMUSG00000026424	Gpr37l1	2.12085989	0.001560634	10.40830118	0	0
Schwann_cells	ENSMUSG00000111994	A330049N07Rik	1.622262796	0.001563963	10.0185853	0	0
Schwann_cells	ENSMUSG00000056966	Gjc3	1.729442146	0.00189324	9.835233857	0	0
Schwann_cells	ENSMUSG00000033006	Sox10	1.967277014	0.00270043	9.508795249	0	0
Schwann_cells	ENSMUSG00000030077	Chl1	12.02572879	0.020177599	9.219154104	0	0
Schwann_cells	ENSMUSG00000039539	Sgcz	7.859702353	0.013938388	9.13926713	0	0
Schwann_cells	ENSMUSG00000060924	Csmd1	78.96232159	0.166813437	8.886785093	0	0
Schwann_cells	ENSMUSG00000038602	Slc35f1	25.31149935	0.053556957	8.884503254	0	0
Schwann_cells	ENSMUSG00000035580	Kcnh8	2.155989136	0.004671204	8.850339843	0	0
Schwann_cells	ENSMUSG00000039954	Stk32a	4.347978427	0.011351765	8.581284364	0	0
Schwann_cells	ENSMUSG00000097789	Gm2115	1.549985643	0.004152794	8.543956885	0	0
Schwann_cells	ENSMUSG00000068748	Ptprz1	8.900671885	0.024661831	8.495490513	0	0
Schwann_cells	ENSMUSG00000025658	Cnksr2	2.345693271	0.007309563	8.326013538	0	0
Schwann_cells	ENSMUSG00000059857	Ntng1	3.972200567	0.012662648	8.293215575	0	0
Schwann_cells	ENSMUSG00000040724	Kcna2	6.614822332	0.025071063	8.043535422	0	0
[truncated: 424 more rows]
