# Supplementary material for: Single-cell RNA-seq of heart reveals intercellular communication drivers of myocardial fibrosis in diabetic cardiomyopathy
Source: eLife. 2023 Apr 3;12:e80479. doi: 10.7554/eLife.80479 (PMC10110238; doi:10.7554/eLife.80479)
Supplement: Supplementary file 6. [file elife-80479-supp6.xls]

Supplementary file 6: Cell type-specific receptors in the cardiac populations
Target_Cluster	Gene ID	Gene Name	Target_Cluster_mean	Other_Cluster_mean	Log2FC	Pvalue	Qvalue	SYMBOL
Adipocytes	ENSMUSG00000020963	Tshr	5.350413495	0.003341351	10.64500315	0	0	TSHR
Adipocytes	ENSMUSG00000031489	Adrb3	2.550201217	0.002065635	10.26980988	0	0	ADRB3
Adipocytes	ENSMUSG00000026834	Acvr1c	6.115947544	0.009369736	9.350351909	0	0	ACVR1C
Adipocytes	ENSMUSG00000055254	Ntrk2	2.665387025	0.038207131	6.124359293	1.24E-186	3.78E-182	NTRK2
Adipocytes	ENSMUSG00000059146	Ntrk3	7.508961795	0.114397595	6.036484825	1.28E-85	3.91E-81	NTRK3
Adipocytes	ENSMUSG00000062209	Erbb4	8.965941032	1.581654754	2.503020291	8.99E-28	2.74E-23	ERBB4
Adipocytes	ENSMUSG00000030168	Adipor2	15.36143094	1.194139083	3.685269827	8.97E-24	2.73E-19	ADIPOR2
Adipocytes	ENSMUSG00000068747	Sort1	1.498096707	0.249539315	2.585791721	1.71E-22	5.21E-18	SORT1
Adipocytes	ENSMUSG00000055737	Ghr	62.66414045	5.718567006	3.453914519	3.16E-12	9.63E-08	GHR
Adipocytes	ENSMUSG00000023206	Il15ra	2.249250967	0.447331478	2.330028457	5.15E-08	0.001570164	IL15RA
B_cell	ENSMUSG00000003379	Cd79a	13.71211972	0.00511916	11.38725699	0	0	CD79A
B_cell	ENSMUSG00000026581	Sell	4.398819197	0.010113673	8.764665422	0	0	SELL
B_cell	ENSMUSG00000047880	Cxcr5	2.332954692	0.007698978	8.243275663	0	0	CXCR5
B_cell	ENSMUSG00000010142	Tnfrsf13b	1.939192372	0.028392836	6.093785135	2.28E-141	6.95E-137	TNFRSF13B
B_cell	ENSMUSG00000049313	Sorl1	4.290395866	0.105120187	5.350999116	3.27E-124	9.98E-120	SORL1
B_cell	ENSMUSG00000024610	Cd74	72.50559493	5.938774801	3.609855094	8.26E-88	2.52E-83	CD74
B_cell	ENSMUSG00000040747	Cd53	3.318892784	0.215828599	3.94274407	1.21E-63	3.69E-59	CD53
B_cell	ENSMUSG00000027009	Itga4	5.002386046	0.434819788	3.524126897	2.27E-55	6.93E-51	ITGA4
B_cell	ENSMUSG00000002897	Il17ra	1.512618385	0.207042843	2.869046819	7.93E-18	2.42E-13	IL17RA
Cardiomyocytes	ENSMUSG00000062209	Erbb4	7.318589789	0.492086	3.894583306	0	0	ERBB4
Cardiomyocytes	ENSMUSG00000019828	Grm1	8.748749196	0.160454284	5.768842556	0	0	GRM1
Cardiomyocytes	ENSMUSG00000051331	Cacna1c	33.51852264	1.807192282	4.213136643	0	0	CACNA1C
Cardiomyocytes	ENSMUSG00000032511	Scn5a	2.899453379	0.189210943	3.937713509	0	0	SCN5A
Cardiomyocytes	ENSMUSG00000060882	Kcnd2	11.51864195	1.2392082	3.216480131	0	0	KCND2
Cardiomyocytes	ENSMUSG00000030996	Art1	2.195808698	0.241839601	3.182629961	0	0	ART1
Cardiomyocytes	ENSMUSG00000024924	Vldlr	3.297411002	0.589246822	2.484389743	0	0	VLDLR
Endocardial_cells	ENSMUSG00000022206	Npr3	23.12141871	0.561090533	5.364852541	0	0	NPR3
Endocardial_cells	ENSMUSG00000046159	Chrm3	14.81687051	0.520553575	4.831050303	0	0	CHRM3
Endocardial_cells	ENSMUSG00000028289	Epha7	4.837709424	0.20928792	4.530763172	0	0	EPHA7
Endocardial_cells	ENSMUSG00000058396	Gpr182	2.078103431	0.140590479	3.885696658	0	0	GPR182
Endocardial_cells	ENSMUSG00000022122	Ednrb	5.091726867	0.621570548	3.03416498	0	0	EDNRB
Endocardial_cells	ENSMUSG00000026814	Eng	22.45336004	3.188934127	2.815785152	0	0	ENG
Endocardial_cells	ENSMUSG00000020717	Pecam1	16.05639148	2.818546699	2.510124321	0	0	PECAM1
Endocardial_cells	ENSMUSG00000048376	F2r	2.121048403	0.39359077	2.43000925	0	0	F2R
Endocardial_cells	ENSMUSG00000026836	Acvr1	3.476933465	0.75260494	2.207850796	0	0	ACVR1
Endocardial_cells	ENSMUSG00000021756	Il6st	7.814821054	1.818966741	2.103093674	0	0	IL6ST
Endocardial_cells	ENSMUSG00000027435	Cd93	3.807800605	0.921452067	2.046976908	0	0	CD93
Endothelial_cells	ENSMUSG00000022579	Gpihbp1	8.056393608	0.534064291	3.915048841	0	0	GPIHBP1
Endothelial_cells	ENSMUSG00000062960	Kdr	8.911769097	0.898843604	3.309569835	0	0	KDR
Endothelial_cells	ENSMUSG00000031871	Cdh5	8.518056689	0.923155858	3.205878185	0	0	CDH5
Endothelial_cells	ENSMUSG00000020154	Ptprb	12.51808656	1.364825815	3.197225313	0	0	PTPRB
Endothelial_cells	ENSMUSG00000007655	Cav1	11.52241336	1.259148946	3.193922064	0	0	CAV1
Endothelial_cells	ENSMUSG00000029648	Flt1	18.92997478	2.0899178	3.179154383	0	0	FLT1
Endothelial_cells	ENSMUSG00000027111	Itga6	5.64664783	0.625746982	3.173743323	0	0	ITGA6
Endothelial_cells	ENSMUSG00000021745	Ptprg	22.3442044	2.940086027	2.925970402	0	0	PTPRG
Endothelial_cells	ENSMUSG00000045092	S1pr1	3.995769271	0.569962713	2.809533832	0	0	S1PR1
Endothelial_cells	ENSMUSG00000004655	Aqp1	6.775575847	0.990812803	2.773659149	0	0	AQP1
Endothelial_cells	ENSMUSG00000033788	Dysf	5.312700446	0.805024981	2.722339911	0	0	DYSF
Endothelial_cells	ENSMUSG00000002944	Cd36	48.38128861	7.393303253	2.7101582	0	0	CD36
Endothelial_cells	ENSMUSG00000033191	Tie1	2.924348117	0.486676586	2.587079789	0	0	TIE1
Endothelial_cells	ENSMUSG00000033278	Ptprm	22.44054173	3.735627509	2.586684992	0	0	PTPRM
Endothelial_cells	ENSMUSG00000038235	F11r	1.838808528	0.342634913	2.424027195	0	0	F11R
Endothelial_cells	ENSMUSG00000025969	Nrp2	5.550484636	1.142932123	2.279874018	0	0	NRP2
Endothelial_cells	ENSMUSG00000026640	Plxna2	4.211681842	1.013278094	2.055366281	0	0	PLXNA2
Epicardial_cells	ENSMUSG00000060882	Kcnd2	24.79741378	2.131184689	3.540462136	0	0	KCND2
Epicardial_cells	ENSMUSG00000051076	Vtcn1	1.855384779	0.004634736	8.645015478	0	0	VTCN1
Epicardial_cells	ENSMUSG00000027070	Lrp2	3.691267935	0.013075784	8.141075243	0	0	LRP2
Epicardial_cells	ENSMUSG00000052430	Bmpr1b	2.013930097	0.022654043	6.474101226	0	0	BMPR1B
Epicardial_cells	ENSMUSG00000052372	Il1rapl1	16.82419546	0.250824303	6.067716562	0	0	IL1RAPL1
Epicardial_cells	ENSMUSG00000026070	Il18r1	2.577120973	0.053178581	5.598771176	0	0	IL18R1
Epicardial_cells	ENSMUSG00000026343	Gpr39	2.791084621	0.1112304	4.649202814	0	0	GPR39
Epicardial_cells	ENSMUSG00000035000	Dpp4	11.40756437	0.470768024	4.598830652	0	0	DPP4
Epicardial_cells	ENSMUSG00000033295	Ptprf	1.77854696	0.102485193	4.117211675	0	0	PTPRF
Epicardial_cells	ENSMUSG00000038119	Cdon	7.41834351	0.468143013	3.986075843	0	0	CDON
Epicardial_cells	ENSMUSG00000029765	Plxna4	29.77777379	2.129215682	3.805841899	0	0	PLXNA4
Epicardial_cells	ENSMUSG00000003534	Ddr1	1.802964312	0.176867778	3.349627692	0	0	DDR1
Epicardial_cells	ENSMUSG00000032340	Neo1	5.0822428	0.798464882	2.670164439	5.04E-300	1.54E-295	NEO1
Epicardial_cells	ENSMUSG00000032537	Ephb1	1.742961166	0.205811607	3.082144177	1.67E-266	5.08E-262	EPHB1
Epicardial_cells	ENSMUSG00000017009	Sdc4	1.729440382	0.270157865	2.678430691	1.20E-182	3.65E-178	SDC4
Epicardial_cells	ENSMUSG00000002980	Bcam	3.432369053	0.793232605	2.113388798	3.67E-134	1.12E-129	BCAM
Epicardial_cells	ENSMUSG00000035305	Ror1	6.722366101	1.635518092	2.039221396	7.62E-130	2.32E-125	ROR1
Epicardial_cells	ENSMUSG00000001761	Smo	1.600909644	0.391812431	2.030656807	3.29E-96	1.00E-91	SMO
Fibroblasts	ENSMUSG00000025089	Gfra1	2.054555952	0.093971015	4.450466979	0	0	GFRA1
Fibroblasts	ENSMUSG00000029231	Pdgfra	7.685931451	0.391364648	4.29563476	0	0	PDGFRA
Fibroblasts	ENSMUSG00000038668	Lpar1	2.776256947	0.195575319	3.827344876	0	0	LPAR1
Fibroblasts	ENSMUSG00000020122	Egfr	6.4821074	0.638086622	3.344638731	0	0	EGFR
Fibroblasts	ENSMUSG00000026674	Ddr2	2.819712919	0.332193773	3.08545135	0	0	DDR2
Fibroblasts	ENSMUSG00000022261	Sdc2	6.454478357	0.765694542	3.075459625	0	0	SDC2
Fibroblasts	ENSMUSG00000002602	Axl	3.997530874	0.498796296	3.00258652	0	0	AXL
Fibroblasts	ENSMUSG00000040249	Lrp1	10.21439019	1.315355331	2.957078588	0	0	LRP1
Fibroblasts	ENSMUSG00000031565	Fgfr1	2.968651384	0.615913016	2.269009163	0	0	FGFR1
Fibroblasts	ENSMUSG00000000392	Fap	1.740014685	0.41267671	2.076015556	0	0	FAP
Lymphatic_ECs	ENSMUSG00000025969	Nrp2	12.47966943	1.998375744	2.642679944	2.61E-139	7.97E-135	NRP2
Lymphatic_ECs	ENSMUSG00000020357	Flt4	10.44572568	0.218999473	5.575841514	0	0	FLT4
Lymphatic_ECs	ENSMUSG00000066705	Fxyd6	3.737505755	0.33096927	3.497306625	1.65E-199	5.02E-195	FXYD6
Lymphatic_ECs	ENSMUSG00000039115	Itga9	7.056793446	1.347508983	2.388717893	1.09E-106	3.33E-102	ITGA9
Lymphatic_ECs	ENSMUSG00000032440	Tgfbr2	8.287329512	2.050369862	2.015023108	1.19E-98	3.63E-94	TGFBR2
Lymphatic_ECs	ENSMUSG00000026321	Tnfrsf11a	1.6884455	0.325832931	2.373491286	2.65E-74	8.07E-70	TNFRSF11A
Lymphatic_ECs	ENSMUSG00000022297	Fzd6	2.054707875	0.477674253	2.104834275	5.89E-54	1.80E-49	FZD6
macrophages	ENSMUSG00000024610	Cd74	43.86000383	1.05429515	5.378555226	0	0	CD74
macrophages	ENSMUSG00000027009	Itga4	2.710872849	0.143506047	4.239574013	0	0	ITGA4
macrophages	ENSMUSG00000026321	Tnfrsf11a	2.247143889	0.087732143	4.678843181	0	0	TNFRSF11A
macrophages	ENSMUSG00000049130	C5ar1	2.517957182	0.024749282	6.668723265	0	0	C5AR1
macrophages	ENSMUSG00000079227	Ccr5	2.34139489	0.031995311	6.193363955	0	0	CCR5
macrophages	ENSMUSG00000032089	Il10ra	2.236340472	0.030725384	6.185564995	0	0	IL10RA
macrophages	ENSMUSG00000024621	Csf1r	8.570693165	0.157238448	5.768385959	0	0	CSF1R
macrophages	ENSMUSG00000040552	C3ar1	2.050879912	0.04198905	5.610086046	0	0	C3AR1
macrophages	ENSMUSG00000030579	Tyrobp	5.832980321	0.21549414	4.758512667	0	0	TYROBP
macrophages	ENSMUSG00000059326	Csf2ra	1.776739956	0.069864672	4.668525611	0	0	CSF2RA
macrophages	ENSMUSG00000005087	Cd44	1.852444069	0.198042472	3.225548215	0	0	CD44
macrophages	ENSMUSG00000014361	Mertk	4.071140738	0.673281966	2.596150368	0	0	MERTK
macrophages	ENSMUSG00000015243	Abca1	4.569631172	0.961835451	2.248215719	0	0	ABCA1
Monocytes	ENSMUSG00000024610	Cd74	98.63910368	5.994662602	4.040409228	8.07E-48	2.46E-43	CD74
Monocytes	ENSMUSG00000040747	Cd53	1.360749504	0.223047721	2.608977194	1.83E-20	5.59E-16	CD53
Monocytes	ENSMUSG00000027009	Itga4	8.205985915	0.43660589	4.23227318	1.92E-66	5.86E-62	ITGA4
Monocytes	ENSMUSG00000035000	Dpp4	9.725322011	0.826448559	3.556749091	3.16E-55	9.62E-51	DPP4
Monocytes	ENSMUSG00000026321	Tnfrsf11a	1.582965402	0.341936754	2.210828317	2.04E-14	6.20E-10	TNFRSF11A
Monocytes	ENSMUSG00000032089	Il10ra	1.212392359	0.290870967	2.059405459	3.14E-09	9.57E-05	IL10RA
Monocytes	ENSMUSG00000059326	Csf2ra	3.826944431	0.267056354	3.840976836	7.29E-39	2.22E-34	CSF2RA
Monocytes	ENSMUSG00000005087	Cd44	4.154381715	0.388714771	3.417849944	2.30E-25	7.02E-21	CD44
Monocytes	ENSMUSG00000060509	Xcr1	3.235865343	0.001276976	11.30720442	0	0	XCR1
Monocytes	ENSMUSG00000042817	Flt3	6.043881896	0.008321936	9.50434062	0	0	FLT3
Monocytes	ENSMUSG00000005947	Itgae	4.32779393	0.012397536	8.447434554	0	0	ITGAE
Monocytes	ENSMUSG00000001281	Itgb7	4.560592207	0.047384163	6.5886724	0	0	ITGB7
Monocytes	ENSMUSG00000030789	Itgax	1.534713719	0.0157934	6.602503953	7.04E-219	2.15E-214	ITGAX
Monocytes	ENSMUSG00000049103	Ccr2	6.395068918	0.280793413	4.509378907	3.80E-166	1.16E-161	CCR2
Monocytes	ENSMUSG00000030149	Klrk1	1.285970655	0.045946006	4.806774468	3.04E-122	9.26E-118	KLRK1
Monocytes	ENSMUSG00000030830	Itgal	1.039000879	0.043031715	4.593652737	2.67E-111	8.15E-107	ITGAL
Monocytes	ENSMUSG00000005672	Kit	2.659608238	0.092527069	4.845194449	3.64E-87	1.11E-82	KIT
Monocytes	ENSMUSG00000000766	Oprm1	2.603836893	0.092950432	4.808033698	6.61E-82	2.02E-77	OPRM1
Monocytes	ENSMUSG00000021624	Cd180	2.910798816	0.135454394	4.425536028	1.34E-73	4.08E-69	CD180
Monocytes	ENSMUSG00000000290	Itgb2	2.287792078	0.162262426	3.817555075	3.09E-39	9.41E-35	ITGB2
Monocytes	ENSMUSG00000009376	Met	1.017433904	0.070390454	3.853411474	2.03E-37	6.18E-33	MET
Monocytes	ENSMUSG00000036381	P2ry14	3.905811481	0.379901778	3.36192395	1.52E-31	4.62E-27	P2RY14
Monocytes	ENSMUSG00000027878	Notch2	6.373895921	1.012913207	2.653664901	4.92E-26	1.50E-21	NOTCH2
Monocytes	ENSMUSG00000017057	Il13ra1	1.810079282	0.340336957	2.411017164	6.80E-15	2.07E-10	IL13RA1
Monocytes	ENSMUSG00000074785	Plxnc1	1.758211343	0.402178602	2.128200267	3.60E-09	0.000109606	PLXNC1
pericytes	ENSMUSG00000000392	Fap	3.199946594	0.640247842	2.321345437	7.24E-252	2.21E-247	FAP
pericytes	ENSMUSG00000036381	P2ry14	3.696492941	0.199586349	4.211072205	0	0	P2RY14
pericytes	ENSMUSG00000024109	Nrxn1	12.04890292	0.200039076	5.912476138	0	0	NRXN1
pericytes	ENSMUSG00000032911	Cspg4	5.42359448	0.106884583	5.66512363	0	0	CSPG4
pericytes	ENSMUSG00000038146	Notch3	12.10122053	0.29270253	5.369573539	0	0	NOTCH3
pericytes	ENSMUSG00000024620	Pdgfrb	19.5319137	0.713280301	4.775220368	0	0	PDGFRB
pericytes	ENSMUSG00000050587	Lrrc4c	2.541806967	0.123725134	4.36064396	0	0	LRRC4C
pericytes	ENSMUSG00000031616	Ednra	4.282909857	0.326381008	3.713962299	0	0	EDNRA
pericytes	ENSMUSG00000025348	Itga7	2.042578174	0.159743131	3.676565497	0	0	ITGA7
pericytes	ENSMUSG00000023915	Tnfrsf21	2.774624067	0.257871712	3.427566886	0	0	TNFRSF21
pericytes	ENSMUSG00000032135	Mcam	2.797409974	0.309918857	3.17412926	0	0	MCAM
pericytes	ENSMUSG00000042284	Itga1	9.184875663	1.737064277	2.402609052	0	0	ITGA1
pericytes	ENSMUSG00000054580	Pla2r1	2.510736348	0.356444018	2.816363124	4.92E-280	1.50E-275	PLA2R1
Schwann_cells	ENSMUSG00000050587	Lrrc4c	5.058040824	0.238171809	4.408504119	4.76E-168	1.45E-163	LRRC4C
Schwann_cells	ENSMUSG00000032135	Mcam	3.107661311	0.434180974	2.839460868	1.93E-25	5.88E-21	MCAM
Schwann_cells	ENSMUSG00000024366	Gfra3	5.069314551	0.000722259	12.77698768	0	0	GFRA3
Schwann_cells	ENSMUSG00000026424	Gpr37l1	2.12085989	0.001560634	10.40830118	0	0	GPR37L1
Schwann_cells	ENSMUSG00000068748	Ptprz1	8.900671885	0.024661831	8.495490513	0	0	PTPRZ1
Schwann_cells	ENSMUSG00000022103	Gfra2	4.163895884	0.048693388	6.418064289	0	0	GFRA2
Schwann_cells	ENSMUSG00000028664	Ephb2	2.83097418	0.022345833	6.985148926	5.89E-277	1.80E-272	EPHB2
Schwann_cells	ENSMUSG00000018166	Erbb3	2.137123797	0.024109163	6.4699451	9.04E-243	2.76E-238	ERBB3
Schwann_cells	ENSMUSG00000020758	Itgb4	1.054186674	0.060126477	4.131986118	4.79E-68	1.46E-63	ITGB4
Schwann_cells	ENSMUSG00000022514	Il1rap	3.025496274	0.451090858	2.745681856	5.46E-27	1.66E-22	IL1RAP
Schwann_cells	ENSMUSG00000050199	Lgr4	2.194677508	0.350039665	2.648418646	2.04E-18	6.23E-14	LGR4
Schwann_cells	ENSMUSG00000025321	Itgb8	1.140876855	0.268925688	2.084863605	4.81E-13	1.47E-08	ITGB8
Schwann_cells	ENSMUSG00000027087	Itgav	4.160629324	0.938174201	2.148874029	1.25E-10	3.82E-06	ITGAV
Smooth_moscle_cells	ENSMUSG00000068747	Sort1	1.991130908	0.237553872	3.067261445	8.56E-73	2.61E-68	SORT1
Smooth_moscle_cells	ENSMUSG00000002980	Bcam	3.962142874	0.857941832	2.207329162	2.96E-44	9.02E-40	BCAM
Smooth_moscle_cells	ENSMUSG00000032911	Cspg4	2.555365733	0.371765414	2.781065326	2.38E-88	7.27E-84	CSPG4
Smooth_moscle_cells	ENSMUSG00000038146	Notch3	8.807508144	0.856799978	3.361703556	9.82E-140	2.99E-135	NOTCH3
Smooth_moscle_cells	ENSMUSG00000031616	Ednra	2.707825045	0.51909582	2.383061753	5.70E-42	1.74E-37	EDNRA
Smooth_moscle_cells	ENSMUSG00000025348	Itga7	1.840138376	0.247147535	2.896369839	9.83E-56	3.00E-51	ITGA7
Smooth_moscle_cells	ENSMUSG00000032135	Mcam	3.330584172	0.419092892	2.990433285	7.57E-81	2.31E-76	MCAM
Smooth_moscle_cells	ENSMUSG00000026768	Itga8	7.587477789	0.271949257	4.802210997	4.36E-164	1.33E-159	ITGA8
T_cell	ENSMUSG00000049313	Sorl1	2.662022788	0.101352298	4.715072213	1.25E-187	3.80E-183	SORL1
T_cell	ENSMUSG00000040747	Cd53	2.703356195	0.209377182	3.690575484	9.27E-132	2.83E-127	CD53
T_cell	ENSMUSG00000027009	Itga4	9.088283891	0.394468159	4.526027143	1.03E-155	3.13E-151	ITGA4
T_cell	ENSMUSG00000026070	Il18r1	4.860146885	0.109053202	5.477895879	5.70E-270	1.74E-265	IL18R1
T_cell	ENSMUSG00000005087	Cd44	3.55136595	0.374661928	3.244712743	8.37E-69	2.55E-64	CD44
T_cell	ENSMUSG00000001281	Itgb7	3.887436903	0.030235238	7.006444527	0	0	ITGB7
T_cell	ENSMUSG00000049103	Ccr2	4.794045872	0.261820027	4.194596354	5.89E-257	1.80E-252	CCR2
T_cell	ENSMUSG00000030149	Klrk1	6.145495453	0.010054076	9.255605008	0	0	KLRK1
T_cell	ENSMUSG00000030830	Itgal	3.272059291	0.024526456	7.059716318	0	0	ITGAL
T_cell	ENSMUSG00000000766	Oprm1	4.275075853	0.070764918	5.916771892	0	0	OPRM1
T_cell	ENSMUSG00000000290	Itgb2	2.51432966	0.150826203	4.05921482	1.28E-133	3.90E-129	ITGB2
T_cell	ENSMUSG00000068227	Il2rb	4.391313949	0.003209849	10.41793131	0	0	IL2RB
T_cell	ENSMUSG00000003882	Il7r	8.911310037	0.006915806	10.33152446	0	0	IL7R
T_cell	ENSMUSG00000030165	Klrd1	3.734406634	0.009994085	8.545588808	0	0	KLRD1
T_cell	ENSMUSG00000026068	Il18rap	2.333669763	0.007256079	8.329194564	0	0	IL18RAP
T_cell	ENSMUSG00000048521	Cxcr6	4.344190146	0.071987113	5.915204774	1.22E-220	3.73E-216	CXCR6
T_cell	ENSMUSG00000005465	Il27ra	2.47311137	0.140350919	4.13921679	2.64E-123	8.06E-119	IL27RA
T_cell	ENSMUSG00000031304	Il2rg	2.207469435	0.145888082	3.91945953	5.27E-117	1.61E-112	IL2RG
T_cell	ENSMUSG00000027215	Cd82	2.343992855	0.213658841	3.455587251	1.92E-78	5.85E-74	CD82
T_cell	ENSMUSG00000041961	Znrf3	2.7935964	0.438123689	2.672713476	1.41E-39	4.29E-35	ZNRF3
