# Supplementary material for: Single-cell RNA-seq of heart reveals intercellular communication drivers of myocardial fibrosis in diabetic cardiomyopathy
Source: eLife. 2023 Apr 3;12:e80479. doi: 10.7554/eLife.80479 (PMC10110238; doi:10.7554/eLife.80479)
Supplement: Supplementary file 7. [file elife-80479-supp7.xls]

Supplementary file 7: Cell type-specific ligands in the cardiac populations
Target_Cluster	Gene ID	Gene Name	Target_Cluster_mean	Other_Cluster_mean	Log2FC	Pvalue	Qvalue
Adipocytes	ENSMUSG00000022878	Adipoq	4.611063699	0.00525517	9.777146473	0	0
Adipocytes	ENSMUSG00000031722	Hp	14.86995277	0.052951965	8.133500136	0	0
Adipocytes	ENSMUSG00000032311	Nrg4	4.214581102	0.067459338	5.965227279	2.80E-110	8.54E-106
Adipocytes	ENSMUSG00000054555	Adam12	3.77329148	0.220547678	4.096661077	3.27E-33	9.95E-29
Adipocytes	ENSMUSG00000023951	Vegfa	4.118437469	1.021281096	2.011717078	3.57E-15	1.09E-10
B_cell	ENSMUSG00000052013	Btla	11.7719889	0.029271752	8.651633249	0	0
B_cell	ENSMUSG00000024399	Ltb	4.313673894	0.026497937	7.346893242	0	0
B_cell	ENSMUSG00000021423	Ly86	4.938041235	0.516674788	3.256610492	1.76E-47	5.36E-43
B_cell	ENSMUSG00000053219	Raet1e	2.642667963	0.164503573	4.005804347	4.49E-47	1.37E-42
B_cell	ENSMUSG00000026399	Cd55	8.976265268	0.920042092	3.286343539	6.49E-43	1.98E-38
Cardiomyocytes	ENSMUSG00000023951	Vegfa	4.151545479	0.425259265	3.287233929	0	0
Cardiomyocytes	ENSMUSG00000031137	Fgf13	17.5827249	0.460859595	5.253687572	0	0
Cardiomyocytes	ENSMUSG00000036585	Fgf1	2.508998889	0.315803378	2.990013326	0	0
Cardiomyocytes	ENSMUSG00000029019	Nppb	7.441846936	1.330500691	2.483691457	0	0
Cardiomyocytes	ENSMUSG00000025006	Sorbs1	12.43816049	2.950449856	2.075766293	0	0
Cardiomyocytes	ENSMUSG00000041616	Nppa	47.51112341	7.125233079	2.737256207	4.29E-46	1.31E-41
Endocardial_cells	ENSMUSG00000062991	Nrg1	10.0302316	0.088660934	6.821840641	0	0
Endocardial_cells	ENSMUSG00000022868	Ahsg	4.107510306	0.10525163	5.286349717	0	0
Endocardial_cells	ENSMUSG00000001930	Vwf	16.20401453	0.517681644	4.96814231	0	0
Endocardial_cells	ENSMUSG00000027962	Vcam1	5.832548981	0.971855663	2.585312547	0	0
Endocardial_cells	ENSMUSG00000026365	Cfh	48.23346207	10.19600926	2.242029777	0	0
Endocardial_cells	ENSMUSG00000039004	Bmp6	9.831210877	2.081834194	2.239513948	0	0
Endocardial_cells	ENSMUSG00000039304	Tnfsf10	1.695977427	0.419887302	2.014042902	1.05E-237	3.19E-233
Endothelial_cells	ENSMUSG00000000489	Pdgfb	2.54926872	0.210559425	3.597784099	0	0
Endothelial_cells	ENSMUSG00000032006	Pdgfd	12.64573778	1.290547501	3.292596061	0	0
Endothelial_cells	ENSMUSG00000061353	Cxcl12	6.453741755	0.703321174	3.197880293	0	0
Endothelial_cells	ENSMUSG00000025608	Podxl	4.517998836	0.52597177	3.102626624	0	0
Endothelial_cells	ENSMUSG00000019647	Sema6a	6.569031953	1.27814873	2.36162506	0	0
Endothelial_cells	ENSMUSG00000001029	Icam2	2.411495052	0.523236797	2.204391941	0	0
Endothelial_cells	ENSMUSG00000031520	Vegfc	3.220129839	0.53923182	2.578141324	5.78E-225	1.76E-220
Epicardial_cells	ENSMUSG00000028871	Rspo1	3.120418422	0.059314079	5.717221105	0	0
Epicardial_cells	ENSMUSG00000055653	Gpc3	10.93836143	0.276859111	5.30410083	0	0
Epicardial_cells	ENSMUSG00000040254	Sema3d	7.52119688	0.244038416	4.945782083	0	0
Epicardial_cells	ENSMUSG00000028780	Sema3c	7.166659987	0.400957203	4.159780749	0	0
Epicardial_cells	ENSMUSG00000020467	Efemp1	12.69438559	0.853561463	3.894551718	0	0
Epicardial_cells	ENSMUSG00000009281	Rarres2	22.05080478	1.57025614	3.811759495	0	0
Epicardial_cells	ENSMUSG00000048915	Efna5	15.6369837	1.217111383	3.683429144	0	0
Epicardial_cells	ENSMUSG00000060275	Nrg2	1.899176096	0.162795614	3.544239943	0	0
Epicardial_cells	ENSMUSG00000056427	Slit3	23.58019425	2.89816818	3.024362381	0	0
Epicardial_cells	ENSMUSG00000001741	Il16	2.951480116	0.376341001	2.971326245	0	0
Epicardial_cells	ENSMUSG00000024164	C3	36.39372849	4.832642801	2.912805592	0	0
Epicardial_cells	ENSMUSG00000039405	Prss23	2.280445126	0.459787308	2.310276906	4.31E-178	1.31E-173
Epicardial_cells	ENSMUSG00000073418	C4b	2.83029718	0.517807146	2.450466762	6.62E-108	2.02E-103
Fibroblasts	ENSMUSG00000026399	Cd55	2.371305071	0.404827037	2.550303727	0	0
Fibroblasts	ENSMUSG00000024164	C3	14.49894761	2.654331263	2.44952785	0	0
Fibroblasts	ENSMUSG00000045573	Penk	1.752881997	0.08635139	4.343365669	0	0
Fibroblasts	ENSMUSG00000021614	Vcan	3.181659981	0.18325846	4.117827958	0	0
Fibroblasts	ENSMUSG00000031740	Mmp2	5.278419698	0.35389428	3.898715719	0	0
Fibroblasts	ENSMUSG00000001506	Col1a1	6.575980631	0.450900589	3.866324751	0	0
Fibroblasts	ENSMUSG00000030116	Mfap5	6.486676227	0.455293808	3.832609686	0	0
Fibroblasts	ENSMUSG00000023885	Thbs2	2.979776766	0.211236544	3.818272904	0	0
Fibroblasts	ENSMUSG00000031548	Sfrp1	2.480313494	0.179270005	3.790316455	0	0
Fibroblasts	ENSMUSG00000031558	Slit2	3.042722509	0.232430393	3.710492131	0	0
Fibroblasts	ENSMUSG00000026837	Col5a1	4.139680945	0.322275946	3.683151162	0	0
Fibroblasts	ENSMUSG00000019929	Dcn	86.59972687	7.048683714	3.618936699	0	0
Fibroblasts	ENSMUSG00000068196	Col8a1	6.153164885	0.525064791	3.550761291	0	0
Fibroblasts	ENSMUSG00000023224	Serping1	13.76868925	1.243790879	3.468575377	0	0
Fibroblasts	ENSMUSG00000029661	Col1a2	10.18659578	0.927847793	3.456640032	0	0
Fibroblasts	ENSMUSG00000020681	Ace	1.98868761	0.186381829	3.415483551	0	0
Fibroblasts	ENSMUSG00000006369	Fbln1	6.174688222	0.612105802	3.334513343	0	0
Fibroblasts	ENSMUSG00000059327	Eda	8.25224031	0.926319622	3.155203855	0	0
Fibroblasts	ENSMUSG00000026043	Col3a1	19.55172057	2.213169272	3.143109868	0	0
Fibroblasts	ENSMUSG00000064080	Fbln2	10.31051551	1.230321133	3.067009632	0	0
Fibroblasts	ENSMUSG00000002900	Lamb1	6.804560225	0.903372915	2.913108359	0	0
Fibroblasts	ENSMUSG00000026249	Serpine2	2.943346115	0.409078446	2.847007771	0	0
Fibroblasts	ENSMUSG00000019899	Lama2	22.71369417	3.191339128	2.831328536	0	0
Fibroblasts	ENSMUSG00000004098	Col5a3	3.494207949	0.502710667	2.797165261	0	0
Fibroblasts	ENSMUSG00000005397	Nid1	9.793369866	1.462520423	2.743348601	0	0
Fibroblasts	ENSMUSG00000027859	Ngf	2.942240889	0.446113016	2.721434221	0	0
Fibroblasts	ENSMUSG00000027204	Fbn1	8.738237848	1.570332391	2.47627241	0	0
Fibroblasts	ENSMUSG00000022371	Col14a1	1.875956847	0.34081434	2.460568699	0	0
Fibroblasts	ENSMUSG00000031375	Bgn	10.45160215	2.037473715	2.358870761	0	0
Fibroblasts	ENSMUSG00000026042	Col5a2	6.389460599	1.359306127	2.232823744	0	0
Fibroblasts	ENSMUSG00000016494	Cd34	7.164913292	1.614415638	2.149937191	0	0
Fibroblasts	ENSMUSG00000017493	Igfbp4	4.981649169	1.21996288	2.029786173	0	0
Fibroblasts	ENSMUSG00000020053	Igf1	3.109517062	0.775952437	2.002650405	0	0
Lymphatic_ECs	ENSMUSG00000054555	Adam12	2.441830388	0.195887354	3.639866827	1.59E-108	4.84E-104
Lymphatic_ECs	ENSMUSG00000019647	Sema6a	11.2052244	2.354053536	2.250952505	1.21E-123	3.69E-119
Lymphatic_ECs	ENSMUSG00000040254	Sema3d	6.27572254	0.412248181	3.928196538	0	0
Lymphatic_ECs	ENSMUSG00000039405	Prss23	4.90499704	0.462778493	3.405858541	7.35E-185	2.24E-180
Lymphatic_ECs	ENSMUSG00000042453	Reln	21.1115107	0.036659868	9.169612528	0	0
Lymphatic_ECs	ENSMUSG00000026822	Lcn2	5.35944378	0.031922586	7.391361959	0	0
Lymphatic_ECs	ENSMUSG00000028883	Sema3a	4.601597666	0.160624967	4.840366784	0	0
Lymphatic_ECs	ENSMUSG00000040329	Il7	2.173367095	0.089679323	4.599012684	0	0
Lymphatic_ECs	ENSMUSG00000019890	Nts	2.036391065	0.094154148	4.434846182	1.31E-246	3.98E-242
Lymphatic_ECs	ENSMUSG00000020902	Ntn1	9.433692884	1.072286631	3.137132033	1.62E-204	4.95E-200
Lymphatic_ECs	ENSMUSG00000034684	Sema3f	1.779870127	0.173189372	3.361349671	4.83E-144	1.47E-139
Lymphatic_ECs	ENSMUSG00000020044	Timp3	19.1774883	3.614136771	2.407690773	1.04E-142	3.18E-138
Lymphatic_ECs	ENSMUSG00000001435	Col18a1	2.292438476	0.222507405	3.364957764	2.94E-116	8.95E-112
Lymphatic_ECs	ENSMUSG00000003617	Cp	15.02819841	3.225617828	2.220024646	1.76E-115	5.38E-111
macrophages	ENSMUSG00000021423	Ly86	4.02477821	0.059178521	6.087691823	0	0
macrophages	ENSMUSG00000001741	Il16	1.571407903	0.31406576	2.322919149	6.57E-291	2.00E-286
macrophages	ENSMUSG00000039109	F13a1	31.84293227	0.282678454	6.815667457	0	0
macrophages	ENSMUSG00000036887	C1qa	27.41266262	0.42151692	6.023108113	0	0
macrophages	ENSMUSG00000036905	C1qb	23.33038542	0.390024241	5.902502536	0	0
macrophages	ENSMUSG00000051439	Cd14	1.620379428	0.048864469	5.051402049	0	0
macrophages	ENSMUSG00000029373	Pf4	10.14960836	0.366777249	4.790376099	0	0
macrophages	ENSMUSG00000017754	Pltp	6.56244539	0.802756347	3.03119944	0	0
macrophages	ENSMUSG00000002985	Apoe	88.24069639	14.33105871	2.622298983	0	0
Monocytes	ENSMUSG00000052013	Btla	7.210143609	0.052453382	7.102848385	0	0
Monocytes	ENSMUSG00000021423	Ly86	2.152007478	0.526955056	2.029931266	5.07E-23	1.55E-18
Monocytes	ENSMUSG00000053219	Raet1e	1.241803896	0.17003221	2.868557392	8.31E-19	2.53E-14
Monocytes	ENSMUSG00000060275	Nrg2	2.739103849	0.217657241	3.653574042	1.06E-40	3.24E-36
Monocytes	ENSMUSG00000053469	Tg	3.340035036	0.084953237	5.297050503	2.43E-116	7.41E-112
Monocytes	ENSMUSG00000048163	Selplg	2.251578768	0.163591105	3.782770735	7.66E-46	2.33E-41
Monocytes	ENSMUSG00000028064	Sema4a	2.031104757	0.182645804	3.475144134	6.06E-39	1.85E-34
Monocytes	ENSMUSG00000004207	Psap	28.0746261	4.96044473	2.500725432	1.87E-17	5.69E-13
Monocytes	ENSMUSG00000021451	Sema4d	1.709424502	0.259065563	2.722121545	5.78E-13	1.76E-08
Monocytes	ENSMUSG00000030403	Vasp	1.562097219	0.33143361	2.236692428	3.80E-09	0.000115781
pericytes	ENSMUSG00000017344	Vtn	9.016676871	0.117006681	6.267933001	0	0
pericytes	ENSMUSG00000031750	Il34	2.504433409	0.042642396	5.876051945	0	0
pericytes	ENSMUSG00000022231	Sema5a	3.485061539	0.562655179	2.630861183	0	0
pericytes	ENSMUSG00000030605	Mfge8	6.275579512	1.014528334	2.628939532	0	0
pericytes	ENSMUSG00000027276	Jag1	2.035739059	0.436754599	2.22065785	3.92E-150	1.20E-145
Schwann_cells	ENSMUSG00000039405	Prss23	2.473144558	0.51555118	2.262159009	1.49E-18	4.53E-14
Schwann_cells	ENSMUSG00000073418	C4b	3.036345924	0.588746011	2.366618877	1.93E-21	5.87E-17
Schwann_cells	ENSMUSG00000042453	Reln	3.232253044	0.305203947	3.404694622	7.70E-126	2.35E-121
Schwann_cells	ENSMUSG00000001435	Col18a1	4.816866303	0.236613536	4.347490365	5.58E-85	1.70E-80
Schwann_cells	ENSMUSG00000059857	Ntng1	3.972200567	0.012662648	8.293215575	0	0
Schwann_cells	ENSMUSG00000031391	L1cam	3.133823545	0.029229672	6.744346505	0	0
Schwann_cells	ENSMUSG00000025964	Adam23	10.16577485	0.104970704	6.597589629	0	0
Schwann_cells	ENSMUSG00000034488	Edil3	3.42828425	0.11953562	4.841974238	9.25E-227	2.82E-222
Schwann_cells	ENSMUSG00000063531	Sema3e	2.15990246	0.039988428	5.755239797	3.56E-175	1.09E-170
Schwann_cells	ENSMUSG00000039542	Ncam1	8.416211575	0.26822939	4.971631746	1.84E-163	5.62E-159
Schwann_cells	ENSMUSG00000022548	Apod	19.89539992	0.342183991	5.861518825	6.66E-120	2.03E-115
Schwann_cells	ENSMUSG00000029838	Ptn	4.299312747	0.222715059	4.270835047	2.15E-87	6.55E-83
Schwann_cells	ENSMUSG00000057969	Sema3b	1.832163263	0.058427452	4.970757892	2.46E-86	7.50E-82
Schwann_cells	ENSMUSG00000025856	Pdgfa	1.676009306	0.2014457	3.056567245	2.52E-23	7.68E-19
Schwann_cells	ENSMUSG00000041936	Agrn	1.936223846	0.412621137	2.230356118	2.32E-09	7.06E-05
Smooth_moscle_cells	ENSMUSG00000001435	Col18a1	3.241203599	0.226167107	3.841068617	1.98E-55	6.03E-51
Smooth_moscle_cells	ENSMUSG00000020019	Ntn4	2.520199105	0.542192742	2.216660011	2.18E-24	6.65E-20
T_cell	ENSMUSG00000024399	Ltb	2.983645909	0.020549166	7.181852653	0	0
T_cell	ENSMUSG00000048163	Selplg	4.59794202	0.139229387	5.045452617	0	0
T_cell	ENSMUSG00000021451	Sema4d	2.679213482	0.246223176	3.443771072	1.80E-78	5.47E-74
T_cell	ENSMUSG00000035042	Ccl5	9.809465291	0.030204046	8.34328887	0	0
