# Supplementary material for: Single-cell RNA-seq of heart reveals intercellular communication drivers of myocardial fibrosis in diabetic cardiomyopathy
Source: eLife. 2023 Apr 3;12:e80479. doi: 10.7554/eLife.80479 (PMC10110238; doi:10.7554/eLife.80479)
Supplement: Supplementary file 8. [file elife-80479-supp8.xls]

Supplementary file 8: Relative expression of a selection of essential growth factors across the major cardiac cell types
GeneID	GeneName	Adipocytes	B_cell	Cardiomyocytes	Endocardial_cells	Endothelial_cells	Epicardial_cells	Fibroblasts	Lymphatic_ECs	Macrophages	Monocytes	Pericytes	Schwann_cells	Smooth_moscle_cells	T_cell
ENSMUSG00000014599	Csf1	0.349624988	0.239571647	0.422526206	0.849226474	0.857486488	2.419543744	1.300462941	0.473939985	0.229306744	0.189378008	0.371112831	0.37235649	0.722415319	0.321093086
ENSMUSG00000037225	Fgf2	0	0	0.180710531	0.22728798	0.288435292	0.377250369	0.559355338	0.035196281	0.095735096	0.106256375	0.180370759	0.705128195	0.406591014	0.147582557
ENSMUSG00000020053	Igf1	4.419499474	0.104542433	0.273625074	0.263141546	0.293475764	0.570159207	3.109517062	0.523653513	3.037606171	0	0.528108556	0.864169289	0.122080791	0.544643011
ENSMUSG00000031750	Il34	0.16732507	0.11210592	0.021603149	0.01194014	0.05480437	0.026658935	0.03098081	0.05674072	0.034458734	0	2.504433409	0.899102291	0.736711781	0.04743473
ENSMUSG00000027859	Ngf	0.363778864	0.267284769	0.132083824	0.414463202	0.163880778	0.101980196	2.942240889	0.132438727	0.155420969	0.087145969	3.31216639	0.492026163	2.875468595	0.049798827
ENSMUSG00000049107	Ntf3	0.16840653	0.114370675	0.132949829	0.166937175	1.341976562	0.101684252	0.501162016	0.106478545	0.115758789	0.090581351	1.129599324	0.150453028	2.063032206	0.242622936
ENSMUSG00000025856	Pdgfa	0.290594881	0.052767803	0.323524719	0.088485677	0.157830723	0.392186855	0.090595247	0.296339686	0.227834985	0	0.512719232	1.676009306	0.923263534	0.093050825
ENSMUSG00000000489	Pdgfb	0.098039216	0.079708268	0.198445854	0.239191474	2.54926872	0.156488586	0.074957683	0.473559515	0.504723314	1.19957892	0.09685351	0.831196909	0.426829762	0.436136019
ENSMUSG00000023951	Vegfa	4.118437469	0.172364322	4.151545479	0.352218132	0.391526804	0.388447395	0.538712209	0.322360525	0.301029925	0.286853353	0.377892664	0.387756964	0.573624903	0.171302461
