# Supplementary material for: Single-cell RNA-seq of heart reveals intercellular communication drivers of myocardial fibrosis in diabetic cardiomyopathy
Source: eLife. 2023 Apr 3;12:e80479. doi: 10.7554/eLife.80479 (PMC10110238; doi:10.7554/eLife.80479)
Supplement: Supplementary file 9. [file elife-80479-supp9.xls]

## Sheet: Sheet15
Supplemmentary file 9: The number of ligand–receptor pairs between cardiac cell populations in healthy mice.

## Sheet: Sheet1
Target_Cluster	Gene ID	Gene Name	Target_Cluster_mean	Other_Cluster_mean	Log2FC	Pvalue	Qvalue
Adipocytes	ENSMUSG00000022878	Adipoq	4.31597	0.00461047	9.87056	0	0
Adipocytes	ENSMUSG00000031722	Hp	16.2056	0.0711048	7.83233	0	0
Adipocytes	ENSMUSG00000032311	Nrg4	2.87299	0.0701364	5.35624	2.51e-74	7.64e-70
Adipocytes	ENSMUSG00000054555	Adam12	1.83174	0.147716	3.63231	2.26e-18	6.89e-14
Adipocytes	ENSMUSG00000048915	Efna5	4.61802	1.73255	1.41438	9.79e-10	2.98e-05
Adipocytes	ENSMUSG00000023951	Vegfa	3.60996	1.07398	1.74901	2.83e-09	8.62e-05
Source(ligand)	Pair.Name	Ligand.ApprovedSymbol	Receptor.ApprovedSymbol	Target(receptor)	Gene ID	Gene Name	Target_Cluster_mean	Other_Cluster_mean	Log2FC	Pvalue	Qvalue
Adipocytes	ADIPOQ_ADIPOR2	ADIPOQ	ADIPOR2	Adipocytes	ENSMUSG00000030168	Adipor2	14.7242	1.08537	3.76193	7.27e-22	2.22e-17
Adipocytes	ADIPOQ_ADIPOR2	ADIPOQ	ADIPOR2	Endothelial_cells	ENSMUSG00000030168	Adipor2	2.37927	0.794536	1.58233	3.17e-118	9.67e-114
Adipocytes	HP_ITGB2	HP	ITGB2	T_cell	ENSMUSG00000000290	Itgb2	2.0864	0.146436	3.83267	8.72e-69	2.66e-64
Adipocytes	NRG4_ERBB4	NRG4	ERBB4	Adipocytes	ENSMUSG00000062209	Erbb4	7.13456	1.35845	2.39286	6.65e-19	2.03e-14
Adipocytes	NRG4_ERBB4	NRG4	ERBB4	Cardiomyocytes	ENSMUSG00000062209	Erbb4	5.76585	0.465361	3.63111	0	0
Adipocytes	ADAM12_ITGA9	ADAM12	ITGA9	Lymphatic_ECs	ENSMUSG00000039115	Itga9	6.64459	1.39688	2.24997	6.7e-53	2.04e-48
Adipocytes	ADAM12_ITGA9	ADAM12	ITGA9	Mono_Macro	ENSMUSG00000039115	Itga9	3.329	1.23087	1.43541	1.72e-100	5.24e-96
Adipocytes	ADAM12_SDC4	ADAM12	SDC4	Epicardial_cells	ENSMUSG00000017009	Sdc4	1.75583	0.287117	2.61245	5.68e-108	1.73e-103
Adipocytes	EFNA5_EPHA4	EFNA5	EPHA4	Endocardial_cells	ENSMUSG00000026235	Epha4	1.90394	0.950858	1.00169	9.07e-47	2.76e-42
Adipocytes	EFNA5_EPHA7	EFNA5	EPHA7	Endocardial_cells	ENSMUSG00000028289	Epha7	4.32069	0.186178	4.53651	0	0
Adipocytes	EFNA5_EPHB2	EFNA5	EPHB2	Schwann_cells	ENSMUSG00000028664	Ephb2	2.11915	0.02294	6.52948	3.47e-109	1.06e-104
Adipocytes	VEGFA_KDR	VEGFA	KDR	Endothelial_cells	ENSMUSG00000062960	Kdr	8.10878	1.02078	2.98981	0	0
Adipocytes	VEGFA_KDR	VEGFA	KDR	Lymphatic_ECs	ENSMUSG00000062960	Kdr	7.355	2.37433	1.63121	5.12e-46	1.56e-41
Adipocytes	VEGFA_EPHB2	VEGFA	EPHB2	Schwann_cells	ENSMUSG00000028664	Ephb2	2.11915	0.02294	6.52948	3.47e-109	1.06e-104
Adipocytes	VEGFA_NRP1	VEGFA	NRP1	Endocardial_cells	ENSMUSG00000025810	Nrp1	13.3467	5.63315	1.24447	2.88e-117	8.78e-113
Adipocytes	VEGFA_NRP1	VEGFA	NRP1	Endothelial_cells	ENSMUSG00000025810	Nrp1	12.3705	4.99507	1.30833	3.65e-296	1.11e-291
Adipocytes	VEGFA_NRP2	VEGFA	NRP2	Endothelial_cells	ENSMUSG00000025969	Nrp2	5.14016	1.159	2.14893	3.23e-280	9.86e-276
Adipocytes	VEGFA_NRP2	VEGFA	NRP2	Lymphatic_ECs	ENSMUSG00000025969	Nrp2	12.2358	1.80393	2.76189	5.73e-91	1.75e-86
Adipocytes	VEGFA_FLT1	VEGFA	FLT1	Endothelial_cells	ENSMUSG00000029648	Flt1	19.857	2.33607	3.0875	0	0

## Sheet: Sheet2
Target_Cluster	Gene ID	Gene Name	Target_Cluster_mean	Other_Cluster_mean	Log2FC	Pvalue	Qvalue
B_cell	ENSMUSG00000052013	Btla	11.0249	0.0215948	8.99586	0	0
B_cell	ENSMUSG00000024399	Ltb	4.7124	0.0269858	7.44812	4.84e-242	1.47e-237
B_cell	ENSMUSG00000053469	Tg	2.49609	0.0849101	4.87759	4.07e-37	1.24e-32
B_cell	ENSMUSG00000053219	Raet1e	2.57563	0.151722	4.08542	6.78e-26	2.07e-21
B_cell	ENSMUSG00000021423	Ly86	4.37419	0.402838	3.44075	3e-20	9.15e-16
B_cell	ENSMUSG00000026399	Cd55	8.49904	0.940214	3.17624	4.12e-16	1.26e-11
Source(ligand)	Pair.Name	Ligand.ApprovedSymbol	Receptor.ApprovedSymbol	Target(receptor)	Gene ID	Gene Name	Target_Cluster_mean	Other_Cluster_mean	Log2FC	Pvalue	Qvalue
B_cell	BTLA_CD79A	BTLA	CD79A	B_cell	ENSMUSG00000003379	Cd79a	14.6689	0.00494537	11.5344	0	0
B_cell	LTBP1_ITGB5	LTBP1	ITGB5	Fibroblasts	ENSMUSG00000022817	Itgb5	2.25184	0.691712	1.70286	1.39e-207	4.24e-203
B_cell	TG_LRP2	TG	LRP2	Epicardial_cells	ENSMUSG00000027070	Lrp2	3.16644	0.0129629	7.93233	0	0
B_cell	RAET1E_KLRK1	RAET1E	KLRK1	T_cell	ENSMUSG00000030149	Klrk1	4.24294	0.00700594	9.24227	0	0

## Sheet: Sheet3
Target_Cluster	Gene ID	Gene Name	Target_Cluster_mean	Other_Cluster_mean	Log2FC	Pvalue	Qvalue
Cardiomyocytes	ENSMUSG00000031137	Fgf13	16.7319	0.510037	5.03585	0	0
Cardiomyocytes	ENSMUSG00000023951	Vegfa	3.81677	0.51552	2.88825	0	0
Cardiomyocytes	ENSMUSG00000015568	Lpl	28.6455	9.54582	1.58537	0	0
Cardiomyocytes	ENSMUSG00000029019	Nppb	9.69833	2.09189	2.21293	5.36e-220	1.63e-215
Cardiomyocytes	ENSMUSG00000036585	Fgf1	1.93494	0.312149	2.63198	1.17e-217	3.56e-213
Cardiomyocytes	ENSMUSG00000025006	Sorbs1	11.3401	2.50083	2.18095	3.43e-185	1.04e-180
Cardiomyocytes	ENSMUSG00000041616	Nppa	60.2178	11.4527	2.3945	9.67e-34	2.95e-29
Source(ligand)	Pair.Name	Ligand.ApprovedSymbol	Receptor.ApprovedSymbol	Target(receptor)	Gene ID	Gene Name	Target_Cluster_mean	Other_Cluster_mean	Log2FC	Pvalue	Qvalue
Cardiomyocytes	FGF13_SCN5A	FGF13	SCN5A	Cardiomyocytes	ENSMUSG00000032511	Scn5a	2.63787	0.221973	3.57091	0	0
Cardiomyocytes	VEGFA_KDR	VEGFA	KDR	Endothelial_cells	ENSMUSG00000062960	Kdr	8.10878	1.02078	2.98981	0	0
Cardiomyocytes	VEGFA_KDR	VEGFA	KDR	Lymphatic_ECs	ENSMUSG00000062960	Kdr	7.355	2.37433	1.63121	5.12e-46	1.56e-41
Cardiomyocytes	VEGFA_EPHB2	VEGFA	EPHB2	Schwann_cells	ENSMUSG00000028664	Ephb2	2.11915	0.02294	6.52948	3.47e-109	1.06e-104
Cardiomyocytes	VEGFA_NRP1	VEGFA	NRP1	Endocardial_cells	ENSMUSG00000025810	Nrp1	13.3467	5.63315	1.24447	2.88e-117	8.78e-113
Cardiomyocytes	VEGFA_NRP1	VEGFA	NRP1	Endothelial_cells	ENSMUSG00000025810	Nrp1	12.3705	4.99507	1.30833	3.65e-296	1.11e-291
Cardiomyocytes	VEGFA_NRP2	VEGFA	NRP2	Endothelial_cells	ENSMUSG00000025969	Nrp2	5.14016	1.159	2.14893	3.23e-280	9.86e-276
Cardiomyocytes	VEGFA_NRP2	VEGFA	NRP2	Lymphatic_ECs	ENSMUSG00000025969	Nrp2	12.2358	1.80393	2.76189	5.73e-91	1.75e-86
Cardiomyocytes	VEGFA_FLT1	VEGFA	FLT1	Endothelial_cells	ENSMUSG00000029648	Flt1	19.857	2.33607	3.0875	0	0
Cardiomyocytes	LPL_LRP1	LPL	LRP1	Fibroblasts	ENSMUSG00000040249	Lrp1	10.1141	1.22197	3.04909	0	0
Cardiomyocytes	LPL_LRP2	LPL	LRP2	Epicardial_cells	ENSMUSG00000027070	Lrp2	3.16644	0.0129629	7.93233	0	0
Cardiomyocytes	LPL_VLDLR	LPL	VLDLR	Cardiomyocytes	ENSMUSG00000024924	Vldlr	3.08654	0.682621	2.17683	4.37e-241	1.33e-236
Cardiomyocytes	LPL_GPIHBP1	LPL	GPIHBP1	Endothelial_cells	ENSMUSG00000022579	Gpihbp1	7.36406	0.649656	3.50275	0	0
Cardiomyocytes	NPPB_NPR3	NPPB	NPR3	Endocardial_cells	ENSMUSG00000022206	Npr3	21.7168	0.588073	5.20668	0	0
Cardiomyocytes	FGF1_FGFR1	FGF1	FGFR1	Fibroblasts	ENSMUSG00000031565	Fgfr1	2.806	0.640535	2.13117	0	0
Cardiomyocytes	FGF1_NRP1	FGF1	NRP1	Endocardial_cells	ENSMUSG00000025810	Nrp1	13.3467	5.63315	1.24447	2.88e-117	8.78e-113
Cardiomyocytes	SORBS1_INSR	SORBS1	INSR	Endothelial_cells	ENSMUSG00000025810	Nrp1	12.3705	4.99507	1.30833	3.65e-296	1.11e-291
Cardiomyocytes	NPPA_NPR3	NPPA	NPR3	Endocardial_cells	ENSMUSG00000022206	Npr3	21.7168	0.588073	5.20668	0	0

## Sheet: Sheet4
Target_Cluster	Gene ID	Gene Name	Target_Cluster_mean	Other_Cluster_mean	Log2FC	Pvalue	Qvalue
Endocardial_cells	ENSMUSG00000062991	Nrg1	11.7244	0.11683	6.64895	0	0
Endocardial_cells	ENSMUSG00000022868	Ahsg	4.53288	0.128714	5.13819	0	0
Endocardial_cells	ENSMUSG00000001930	Vwf	14.2326	0.543454	4.71089	0	0
Endocardial_cells	ENSMUSG00000026365	Cfh	42.82	10.4082	2.04056	0	0
Endocardial_cells	ENSMUSG00000039004	Bmp6	10.9039	1.93202	2.49666	1.97e-297	6.02e-293
Endocardial_cells	ENSMUSG00000027962	Vcam1	5.90679	0.970461	2.60563	1.43e-287	4.37e-283
Endocardial_cells	ENSMUSG00000001300	Efnb2	2.0383	0.513098	1.99006	8.63e-148	2.63e-143
Endocardial_cells	ENSMUSG00000020902	Ntn1	3.3697	0.966186	1.80225	1.04e-143	3.16e-139
Endocardial_cells	ENSMUSG00000001029	Icam2	2.66465	0.80694	1.72341	3.5e-142	1.07e-137
Endocardial_cells	ENSMUSG00000067158	Col4a4	4.07796	1.2341	1.72439	5.26e-123	1.6e-118
Endocardial_cells	ENSMUSG00000079465	Col4a3	2.32097	0.611139	1.92516	1.96e-97	5.97e-93
Endocardial_cells	ENSMUSG00000003617	Cp	6.28241	3.08881	1.02427	1.07e-77	3.25e-73
Endocardial_cells	ENSMUSG00000027082	Tfpi	1.66511	0.633138	1.39503	2.15e-68	6.57e-64
Endocardial_cells	ENSMUSG00000001870	Ltbp1	3.60496	1.7375	1.05297	7.83e-44	2.39e-39
Endocardial_cells	ENSMUSG00000027200	Sema6d	1.83342	0.879151	1.06036	5.56e-32	1.7e-27
Source(ligand)	Pair.Name	Ligand.ApprovedSymbol	Receptor.ApprovedSymbol	Target(receptor)	Gene ID	Gene Name	Target_Cluster_mean	Other_Cluster_mean	Log2FC	Pvalue	Qvalue
Endocardial_cells	NRG1_ERBB4	NRG1	ERBB4	Adipocytes	ENSMUSG00000062209	Erbb4	7.13456	1.35845	2.39286	6.65e-19	2.03e-14
Endocardial_cells	NRG1_ERBB4	NRG1	ERBB4	Cardiomyocytes	ENSMUSG00000062209	Erbb4	5.76585	0.465361	3.63111	0	0
Endocardial_cells	NRG1_ERBB3	NRG1	ERBB3	Schwann_cells	ENSMUSG00000018166	Erbb3	1.97328	0.0214902	6.52077	5.39e-200	1.64e-195
Endocardial_cells	AHSG_INSR	AHSG	INSR	Cardiomyocytes	ENSMUSG00000005534	Insr	2.98475	1.32257	1.17426	2.11e-47	6.42e-43
Endocardial_cells	CFH_SELL	CFH	SELL	B_cell	ENSMUSG00000026581	Sell	3.77969	0.00675152	9.12884	0	0
Endocardial_cells	BMP6_ACVR1	BMP6	ACVR1	Endocardial_cells	ENSMUSG00000026836	Acvr1	3.37377	0.662514	2.34834	8.68e-236	2.64e-231
Endocardial_cells	BMP6_BMPR1A	BMP6	BMPR1A	Epicardial_cells	ENSMUSG00000021796	Bmpr1a	3.97903	1.47658	1.43015	3.54e-56	1.08e-51
Endocardial_cells	BMP6_BMPR1B	BMP6	BMPR1B	Epicardial_cells	ENSMUSG00000052430	Bmpr1b	2.00496	0.0250515	6.32253	0	0
Endocardial_cells	BMP6_BMPR2	BMP6	BMPR2	Endocardial_cells	ENSMUSG00000067336	Bmpr2	5.53515	1.98194	1.48171	3.37e-134	1.03e-129
Endocardial_cells	VCAM1_ITGA4	VCAM1	ITGA4	B_cell	ENSMUSG00000027009	Itga4	2.75293	0.398801	2.78723	7.05e-15	2.15e-10
Endocardial_cells	VCAM1_ITGA4	VCAM1	ITGA4	Mono_Macro	ENSMUSG00000027009	Itga4	2.69783	0.101173	4.7369	0	0
Endocardial_cells	VCAM1_ITGA4	VCAM1	ITGA4	T_cell	ENSMUSG00000027009	Itga4	6.90307	0.362463	4.25133	9.22e-79	2.81e-74
Endocardial_cells	VCAM1_ITGB7	VCAM1	ITGB7	T_cell	ENSMUSG00000001281	Itgb7	3.64876	0.0275318	7.05017	0	0
Endocardial_cells	VCAM1_ITGB2	VCAM1	ITGB2	T_cell	ENSMUSG00000000290	Itgb2	2.0864	0.146436	3.83267	8.72e-69	2.66e-64
Endocardial_cells	EFNB2_EPHA4	EFNB2	EPHA4	Endocardial_cells	ENSMUSG00000026235	Epha4	1.90394	0.950858	1.00169	9.07e-47	2.76e-42
Endocardial_cells	EFNB2_EPHB2	EFNB2	EPHB2	Schwann_cells	ENSMUSG00000028664	Ephb2	2.11915	0.02294	6.52948	3.47e-109	1.06e-104
Endocardial_cells	EFNB2_EPHB4	EFNB2	EPHB4	Endocardial_cells	ENSMUSG00000029710	Ephb4	1.93456	0.521337	1.89171	9.28e-137	2.83e-132
Endocardial_cells	EFNB2_EPHB4	EFNB2	EPHB4	Lymphatic_ECs	ENSMUSG00000029710	Ephb4	1.46619	0.664713	1.14127	5.25e-11	1.6e-06
Endocardial_cells	EFNB2_GRM1	EFNB2	GRM1	Cardiomyocytes	ENSMUSG00000019828	Grm1	8.39989	0.19869	5.40178	0	0
Endocardial_cells	EFNB2_PECAM1	EFNB2	PECAM1	Endocardial_cells	ENSMUSG00000020717	Pecam1	14.8386	2.54784	2.54201	0	0
Endocardial_cells	EFNB2_PECAM1	EFNB2	PECAM1	Endothelial_cells	ENSMUSG00000020717	Pecam1	8.46541	2.74745	1.62349	0	0
Endocardial_cells	NTN1_NEO1	NTN1	NEO1	Cardiomyocytes	ENSMUSG00000032340	Neo1	1.69331	0.788357	1.10293	5.08e-54	1.55e-49
Endocardial_cells	NTN1_NEO1	NTN1	NEO1	Epicardial_cells	ENSMUSG00000032340	Neo1	4.77086	0.781885	2.60922	5.26e-167	1.6e-162
Endocardial_cells	ICAM2_ITGB2	ICAM2	ITGB2	T_cell	ENSMUSG00000000290	Itgb2	2.0864	0.146436	3.83267	8.72e-69	2.66e-64
Endocardial_cells	ICAM2_ITGAL	ICAM2	ITGAL	T_cell	ENSMUSG00000030830	Itgal	3.31786	0.0173072	7.58273	0	0
Endocardial_cells	COL4A4_CD93	COL4A4	CD93	Endocardial_cells	ENSMUSG00000027435	Cd93	3.64821	0.811003	2.16941	5.95e-233	1.81e-228
Endocardial_cells	COL4A4_CD93	COL4A4	CD93	Endothelial_cells	ENSMUSG00000027435	Cd93	2.51768	0.771076	1.70715	2.59e-194	7.91e-190
Endocardial_cells	COL4A3_CD93	COL4A3	CD93	Endocardial_cells	ENSMUSG00000027435	Cd93	3.64821	0.811003	2.16941	5.95e-233	1.81e-228
Endocardial_cells	COL4A3_CD93	COL4A3	CD93	Endothelial_cells	ENSMUSG00000027435	Cd93	2.51768	0.771076	1.70715	2.59e-194	7.91e-190
Endocardial_cells	COL4A3_CD47	COL4A3	CD47	Lymphatic_ECs	ENSMUSG00000055447	Cd47	5.90848	2.56471	1.20399	3.11e-25	9.46e-21
Endocardial_cells	COL4A3_CD47	COL4A3	CD47	T_cell	ENSMUSG00000055447	Cd47	5.57502	2.59597	1.1027	3.35e-09	0.000102157
Endocardial_cells	TFPI_LRP1	TFPI	LRP1	Fibroblasts	ENSMUSG00000040249	Lrp1	10.1141	1.22197	3.04909	0	0
Endocardial_cells	TFPI_VLDLR	TFPI	VLDLR	Cardiomyocytes	ENSMUSG00000024924	Vldlr	3.08654	0.682621	2.17683	4.37e-241	1.33e-236
Endocardial_cells	LTBP1_ITGB5	LTBP1	ITGB5	Fibroblasts	ENSMUSG00000022817	Itgb5	2.25184	0.691712	1.70286	1.39e-207	4.24e-203
Endocardial_cells	SEMA6D_KDR	SEMA6D	KDR	Endothelial_cells	ENSMUSG00000062960	Kdr	8.10878	1.02078	2.98981	0	0
Endocardial_cells	SEMA6D_KDR	SEMA6D	KDR	Lymphatic_ECs	ENSMUSG00000062960	Kdr	7.355	2.37433	1.63121	5.12e-46	1.56e-41
Endocardial_cells	SEMA6D_TYROBP	SEMA6D	TYROBP	Mono_Macro	ENSMUSG00000030579	Tyrobp	6.6322	0.220462	4.91089	0	0

## Sheet: Sheet5
Target_Cluster	Gene ID	Gene Name	Target_Cluster_mean	Other_Cluster_mean	Log2FC	Pvalue	Qvalue
Endothelial_cells	ENSMUSG00000000489	Pdgfb	2.13183	0.225458	3.24116	0	0
Endothelial_cells	ENSMUSG00000061353	Cxcl12	6.27557	0.699897	3.16453	0	0
Endothelial_cells	ENSMUSG00000025608	Podxl	4.40363	0.545983	3.01177	0	0
Endothelial_cells	ENSMUSG00000032006	Pdgfd	9.89426	1.25085	2.98368	0	0
Endothelial_cells	ENSMUSG00000019647	Sema6a	5.28802	1.28599	2.03985	0	0
Endothelial_cells	ENSMUSG00000001029	Icam2	2.69474	0.586313	2.2004	6.8e-268	2.07e-263
Endothelial_cells	ENSMUSG00000031520	Vegfc	3.47453	0.497194	2.80494	5.44e-171	1.66e-166
Endothelial_cells	ENSMUSG00000031503	Col4a2	6.08903	2.7422	1.15088	5.65e-147	1.72e-142
Endothelial_cells	ENSMUSG00000039004	Bmp6	5.08855	2.37139	1.10152	1.46e-125	4.45e-121
Endothelial_cells	ENSMUSG00000032562	Gnai2	2.38759	1.17381	1.02435	1.86e-57	5.67e-53
Source(ligand)	Pair.Name	Ligand.ApprovedSymbol	Receptor.ApprovedSymbol	Target(receptor)	Gene ID	Gene Name	Target_Cluster_mean	Other_Cluster_mean	Log2FC	Pvalue	Qvalue
Endothelial_cells	PDGFB_LRP1	PDGFB	LRP1	Fibroblasts	ENSMUSG00000040249	Lrp1	10.1141	1.22197	3.04909	0	0
Endothelial_cells	PDGFB_PDGFRB	PDGFB	PDGFRB	pericytes	ENSMUSG00000024620	Pdgfrb	16.4659	0.717894	4.51957	0	0
Endothelial_cells	PDGFB_PDGFRB	PDGFB	PDGFRB	Smooth_moscle_cells	ENSMUSG00000024620	Pdgfrb	3.4731	1.26817	1.45347	9.3e-18	2.83e-13
Endothelial_cells	PDGFB_PDGFRA	PDGFB	PDGFRA	Fibroblasts	ENSMUSG00000029231	Pdgfra	7.03117	0.450328	3.96472	0	0
Endothelial_cells	PDGFB_ART1	PDGFB	ART1	Cardiomyocytes	ENSMUSG00000030996	Art1	2.02433	0.311229	2.7014	1e-283	3.06e-279
Endothelial_cells	CXCL12_CXCR4	CXCL12	CXCR4	B_cell	ENSMUSG00000045382	Cxcr4	2.16147	0.0649563	5.0564	3.16e-56	9.64e-52
Endothelial_cells	CXCL12_ACKR3	CXCL12	ACKR3	Fibroblasts	ENSMUSG00000044337	Ackr3	3.53939	1.08552	1.70511	1.33e-154	4.05e-150
Endothelial_cells	PODXL_SELL	PODXL	SELL	B_cell	ENSMUSG00000026581	Sell	3.77969	0.00675152	9.12884	0	0
Endothelial_cells	PDGFD_PDGFRB	PDGFD	PDGFRB	pericytes	ENSMUSG00000024620	Pdgfrb	16.4659	0.717894	4.51957	0	0
Endothelial_cells	PDGFD_PDGFRB	PDGFD	PDGFRB	Smooth_moscle_cells	ENSMUSG00000024620	Pdgfrb	3.4731	1.26817	1.45347	9.3e-18	2.83e-13
Endothelial_cells	SEMA6A_PLXNA2	SEMA6A	PLXNA2	Endothelial_cells	ENSMUSG00000026640	Plxna2	3.74368	0.978996	1.93508	4.41e-215	1.34e-210
Endothelial_cells	SEMA6A_PLXNA4	SEMA6A	PLXNA4	Endocardial_cells	ENSMUSG00000029765	Plxna4	6.79753	2.53995	1.42021	6.49e-230	1.98e-225
Endothelial_cells	SEMA6A_PLXNA4	SEMA6A	PLXNA4	Epicardial_cells	ENSMUSG00000029765	Plxna4	26.3201	2.02779	3.69818	0	0
Endothelial_cells	ICAM2_ITGB2	ICAM2	ITGB2	T_cell	ENSMUSG00000000290	Itgb2	2.0864	0.146436	3.83267	8.72e-69	2.66e-64
Endothelial_cells	ICAM2_ITGAL	ICAM2	ITGAL	T_cell	ENSMUSG00000030830	Itgal	3.31786	0.0173072	7.58273	0	0
Endothelial_cells	VEGFC_KDR	VEGFC	KDR	Endothelial_cells	ENSMUSG00000062960	Kdr	8.10878	1.02078	2.98981	0	0
Endothelial_cells	VEGFC_KDR	VEGFC	KDR	Lymphatic_ECs	ENSMUSG00000062960	Kdr	7.355	2.37433	1.63121	5.12e-46	1.56e-41
Endothelial_cells	VEGFC_FLT4	VEGFC	FLT4	Lymphatic_ECs	ENSMUSG00000020357	Flt4	10.3106	0.198948	5.69558	0	0
Endothelial_cells	VEGFC_NRP2	VEGFC	NRP2	Endothelial_cells	ENSMUSG00000025969	Nrp2	5.14016	1.159	2.14893	3.23e-280	9.86e-276
Endothelial_cells	VEGFC_NRP2	VEGFC	NRP2	Lymphatic_ECs	ENSMUSG00000025969	Nrp2	12.2358	1.80393	2.76189	5.73e-91	1.75e-86
Endothelial_cells	COL4A2_CD93	COL4A2	CD93	Endocardial_cells	ENSMUSG00000027435	Cd93	3.64821	0.811003	2.16941	5.95e-233	1.81e-228
Endothelial_cells	COL4A2_CD93	COL4A2	CD93	Endothelial_cells	ENSMUSG00000027435	Cd93	2.51768	0.771076	1.70715	2.59e-194	7.91e-190
Endothelial_cells	BMP6_ACVR1	BMP6	ACVR1	Endocardial_cells	ENSMUSG00000026836	Acvr1	3.37377	0.662514	2.34834	8.68e-236	2.64e-231
Endothelial_cells	BMP6_BMPR1A	BMP6	BMPR1A	Epicardial_cells	ENSMUSG00000021796	Bmpr1a	3.97903	1.47658	1.43015	3.54e-56	1.08e-51
Endothelial_cells	BMP6_BMPR1B	BMP6	BMPR1B	Epicardial_cells	ENSMUSG00000052430	Bmpr1b	2.00496	0.0250515	6.32253	0	0
Endothelial_cells	BMP6_BMPR2	BMP6	BMPR2	Endocardial_cells	ENSMUSG00000067336	Bmpr2	5.53515	1.98194	1.48171	3.37e-134	1.03e-129
Endothelial_cells	GNAI2_EGFR	GNAI2	EGFR	Fibroblasts	ENSMUSG00000020122	Egfr	6.55326	0.722124	3.1819	0	0
Endothelial_cells	GNAI2_CAV1	GNAI2	CAV1	Endothelial_cells	ENSMUSG00000007655	Cav1	10.2739	1.34384	2.93455	0	0
Endothelial_cells	GNAI2_C5AR1	GNAI2	C5AR1	Mono_Macro	ENSMUSG00000049130	C5ar1	2.5554	0.0202484	6.9796	0	0
Endothelial_cells	GNAI2_TSHR	GNAI2	TSHR	Adipocytes	ENSMUSG00000020963	Tshr	5.06591	0.00240905	11.0381	0	0
Endothelial_cells	GNAI2_EDNRA	GNAI2	EDNRA	pericytes	ENSMUSG00000031616	Ednra	3.33442	0.306956	3.44133	1.83e-231	5.56e-227
Endothelial_cells	GNAI2_EDNRA	GNAI2	EDNRA	Smooth_moscle_cells	ENSMUSG00000031616	Ednra	2.39177	0.401836	2.5734	1.84e-29	5.61e-25
Endothelial_cells	GNAI2_F2R	GNAI2	F2R	Endocardial_cells	ENSMUSG00000048376	F2r	1.91776	0.396042	2.27569	9.79e-152	2.98e-147
Endothelial_cells	GNAI2_OPRM1	GNAI2	OPRM1	T_cell	ENSMUSG00000000766	Oprm1	4.38756	0.0572037	6.26117	4.23e-217	1.29e-212

## Sheet: Sheet6
Target_Cluster	Gene ID	Gene Name	Target_Cluster_mean	Other_Cluster_mean	Log2FC	Pvalue	Qvalue
Epicardial_cells	ENSMUSG00000020467	Efemp1	10.7085	0.966546	3.46978	0	0
Epicardial_cells	ENSMUSG00000028871	Rspo1	2.95515	0.0650572	5.50538	0	0
Epicardial_cells	ENSMUSG00000055653	Gpc3	10.0488	0.265056	5.24457	0	0
Epicardial_cells	ENSMUSG00000040254	Sema3d	6.04708	0.236431	4.67675	0	0
Epicardial_cells	ENSMUSG00000028780	Sema3c	5.82927	0.379128	3.94256	0	0
Epicardial_cells	ENSMUSG00000048915	Efna5	13.8526	1.22904	3.49456	0	0
Epicardial_cells	ENSMUSG00000009281	Rarres2	24.3923	1.73473	3.81365	1.18e-304	3.59e-300
Epicardial_cells	ENSMUSG00000056427	Slit3	19.8844	3.11627	2.67375	8.4e-243	2.56e-238
Epicardial_cells	ENSMUSG00000024164	C3	38.5276	5.75025	2.7442	7.6e-217	2.32e-212
Epicardial_cells	ENSMUSG00000060275	Nrg2	1.7419	0.130088	3.74311	4.47e-206	1.36e-201
Epicardial_cells	ENSMUSG00000001741	Il16	2.78356	0.365808	2.92777	1.28e-191	3.91e-187
Epicardial_cells	ENSMUSG00000039405	Prss23	2.32282	0.508394	2.19186	5.12e-94	1.56e-89
Epicardial_cells	ENSMUSG00000026043	Col3a1	15.536	6.43601	1.27138	3.91e-89	1.19e-84
Epicardial_cells	ENSMUSG00000017466	Timp2	10.545	4.07512	1.37164	3.67e-75	1.12e-70
Epicardial_cells	ENSMUSG00000022231	Sema5a	2.13644	0.612697	1.80196	1.21e-73	3.68e-69
Epicardial_cells	ENSMUSG00000022371	Col14a1	2.72267	0.696988	1.96581	5.54e-73	1.69e-68
Epicardial_cells	ENSMUSG00000006369	Fbln1	4.82928	2.34466	1.04243	8.88e-48	2.71e-43
Epicardial_cells	ENSMUSG00000014599	Csf1	2.06526	0.769277	1.42475	5.96e-39	1.82e-34
Epicardial_cells	ENSMUSG00000037820	Tgm2	2.04371	0.717035	1.51107	2.38e-37	7.25e-33
Epicardial_cells	ENSMUSG00000024659	Anxa1	1.79949	0.67117	1.42284	5.32e-34	1.62e-29
Epicardial_cells	ENSMUSG00000031274	Col4a5	1.78449	0.887746	1.00729	3.48e-27	1.06e-22
Source(ligand)	Pair.Name	Ligand.ApprovedSymbol	Receptor.ApprovedSymbol	Target(receptor)	Gene ID	Gene Name	Target_Cluster_mean	Other_Cluster_mean	Log2FC	Pvalue	Qvalue
Epicardial_cells	EFEMP1_EGFR	EFEMP1	EGFR	Fibroblasts	ENSMUSG00000020122	Egfr	6.55326	0.722124	3.1819	0	0
Epicardial_cells	RSPO1_LRP6	RSPO1	LRP6	Mono_Macro	ENSMUSG00000030201	Lrp6	3.39535	1.28955	1.39669	1.06e-81	3.23e-77
Epicardial_cells	RSPO1_LGR4	RSPO1	LGR4	Schwann_cells	ENSMUSG00000050199	Lgr4	2.01765	0.341566	2.56244	7.66e-11	2.33e-06
Epicardial_cells	RSPO1_ZNRF3	RSPO1	ZNRF3	T_cell	ENSMUSG00000041961	Znrf3	2.29406	0.400983	2.51629	3.55e-22	1.08e-17
Epicardial_cells	SEMA3D_NRP1	SEMA3D	NRP1	Endocardial_cells	ENSMUSG00000025810	Nrp1	13.3467	5.63315	1.24447	2.88e-117	8.78e-113
Epicardial_cells	SEMA3D_NRP1	SEMA3D	NRP1	Endothelial_cells	ENSMUSG00000025810	Nrp1	12.3705	4.99507	1.30833	3.65e-296	1.11e-291
Epicardial_cells	SEMA3C_NRP1	SEMA3C	NRP1	Endocardial_cells	ENSMUSG00000025810	Nrp1	13.3467	5.63315	1.24447	2.88e-117	8.78e-113
Epicardial_cells	SEMA3C_NRP1	SEMA3C	NRP1	Endothelial_cells	ENSMUSG00000025810	Nrp1	12.3705	4.99507	1.30833	3.65e-296	1.11e-291
Epicardial_cells	SEMA3C_NRP2	SEMA3C	NRP2	Endothelial_cells	ENSMUSG00000025969	Nrp2	5.14016	1.159	2.14893	3.23e-280	9.86e-276
Epicardial_cells	SEMA3C_NRP2	SEMA3C	NRP2	Lymphatic_ECs	ENSMUSG00000025969	Nrp2	12.2358	1.80393	2.76189	5.73e-91	1.75e-86
Epicardial_cells	SEMA3C_PLXND1	SEMA3C	PLXND1	Endothelial_cells	ENSMUSG00000030123	Plxnd1	2.04539	0.526266	1.95851	1.26e-165	3.85e-161
Epicardial_cells	EFNA5_EPHA4	EFNA5	EPHA4	Endocardial_cells	ENSMUSG00000026235	Epha4	1.90394	0.950858	1.00169	9.07e-47	2.76e-42
Epicardial_cells	EFNA5_EPHA7	EFNA5	EPHA7	Endocardial_cells	ENSMUSG00000028289	Epha7	4.32069	0.186178	4.53651	0	0
Epicardial_cells	EFNA5_EPHB2	EFNA5	EPHB2	Schwann_cells	ENSMUSG00000028664	Ephb2	2.11915	0.02294	6.52948	3.47e-109	1.06e-104
Epicardial_cells	C3_LRP1	C3	LRP1	Fibroblasts	ENSMUSG00000040249	Lrp1	10.1141	1.22197	3.04909	0	0
Epicardial_cells	C3_C3AR1	C3	C3AR1	Mono_Macro	ENSMUSG00000040552	C3ar1	1.89961	0.0371781	5.67511	0	0
Epicardial_cells	C3_ITGB2	C3	ITGB2	T_cell	ENSMUSG00000000290	Itgb2	2.0864	0.146436	3.83267	8.72e-69	2.66e-64
Epicardial_cells	NRG2_ERBB4	NRG2	ERBB4	Adipocytes	ENSMUSG00000062209	Erbb4	7.13456	1.35845	2.39286	6.65e-19	2.03e-14
Epicardial_cells	NRG2_ERBB4	NRG2	ERBB4	Cardiomyocytes	ENSMUSG00000062209	Erbb4	5.76585	0.465361	3.63111	0	0
Epicardial_cells	NRG2_ERBB3	NRG2	ERBB3	Schwann_cells	ENSMUSG00000018166	Erbb3	1.97328	0.0214902	6.52077	5.39e-200	1.64e-195
Epicardial_cells	IL16_KCND2	IL16	KCND2	Cardiomyocytes	ENSMUSG00000060882	Kcnd2	11.8308	1.41388	3.06482	0	0
Epicardial_cells	IL16_KCND2	IL16	KCND2	Epicardial_cells	ENSMUSG00000060882	Kcnd2	22.7225	2.37138	3.26032	0	0
Epicardial_cells	COL3A1_DDR1	COL3A1	DDR1	Epicardial_cells	ENSMUSG00000003534	Ddr1	1.6336	0.181038	3.1737	1.93e-160	5.88e-156
Epicardial_cells	COL3A1_DDR2	COL3A1	DDR2	Fibroblasts	ENSMUSG00000026674	Ddr2	2.46955	0.308376	3.00149	0	0
Epicardial_cells	COL14A1_CD44	COL14A1	CD44	T_cell	ENSMUSG00000005087	Cd44	2.74094	0.336969	3.02398	1.28e-39	3.9e-35
Epicardial_cells	CSF1_CSF1R	CSF1	CSF1R	Mono_Macro	ENSMUSG00000024621	Csf1r	8.50063	0.154267	5.78407	0	0
Epicardial_cells	TGM2_SDC4	TGM2	SDC4	Epicardial_cells	ENSMUSG00000017009	Sdc4	1.75583	0.287117	2.61245	5.68e-108	1.73e-103
Epicardial_cells	ANXA1_EGFR	ANXA1	EGFR	Fibroblasts	ENSMUSG00000020122	Egfr	6.55326	0.722124	3.1819	0	0
Epicardial_cells	ANXA1_DYSF	ANXA1	DYSF	Endothelial_cells	ENSMUSG00000033788	Dysf	3.64684	0.685583	2.41124	0	0
Epicardial_cells	ANXA1_DYSF	ANXA1	DYSF	Lymphatic_ECs	ENSMUSG00000033788	Dysf	4.05663	1.23996	1.70999	2.83e-29	8.64e-25
Epicardial_cells	COL4A5_CD93	COL4A5	CD93	Endocardial_cells	ENSMUSG00000027435	Cd93	3.64821	0.811003	2.16941	5.95e-233	1.81e-228
Epicardial_cells	COL4A5_CD93	COL4A5	CD93	Endothelial_cells	ENSMUSG00000027435	Cd93	2.51768	0.771076	1.70715	2.59e-194	7.91e-190

## Sheet: Sheet7
Target_Cluster	Gene ID	Gene Name	Target_Cluster_mean	Other_Cluster_mean	Log2FC	Pvalue	Qvalue
Fibroblasts	ENSMUSG00000021614	Vcan	3.29982	0.197481	4.0626	0	0
Fibroblasts	ENSMUSG00000045573	Penk	1.9975	0.127337	3.97147	0	0
Fibroblasts	ENSMUSG00000031558	Slit2	2.88741	0.20074	3.84637	0	0
Fibroblasts	ENSMUSG00000030116	Mfap5	6.77871	0.531333	3.67332	0	0
Fibroblasts	ENSMUSG00000023885	Thbs2	2.91668	0.229627	3.66696	0	0
Fibroblasts	ENSMUSG00000001506	Col1a1	6.14324	0.48649	3.65852	0	0
Fibroblasts	ENSMUSG00000031740	Mmp2	4.54232	0.360244	3.65639	0	0
Fibroblasts	ENSMUSG00000031548	Sfrp1	2.3226	0.186863	3.63568	0	0
Fibroblasts	ENSMUSG00000026837	Col5a1	4.00531	0.328807	3.6066	0	0
Fibroblasts	ENSMUSG00000019929	Dcn	87.8537	8.68402	3.33867	0	0
Fibroblasts	ENSMUSG00000020681	Ace	2.23174	0.221016	3.33594	0	0
Fibroblasts	ENSMUSG00000029661	Col1a2	9.85238	0.977102	3.33389	0	0
Fibroblasts	ENSMUSG00000068196	Col8a1	5.48434	0.546727	3.32643	0	0
Fibroblasts	ENSMUSG00000023224	Serping1	13.6816	1.41115	3.27729	0	0
Fibroblasts	ENSMUSG00000004098	Col5a3	3.8715	0.422256	3.1967	0	0
Fibroblasts	ENSMUSG00000006369	Fbln1	6.64324	0.749414	3.14805	0	0
Fibroblasts	ENSMUSG00000026043	Col3a1	18.2383	2.18516	3.06116	0	0
Fibroblasts	ENSMUSG00000059327	Eda	8.74587	1.05787	3.04744	0	0
Fibroblasts	ENSMUSG00000064080	Fbln2	10.7045	1.40828	2.92622	0	0
Fibroblasts	ENSMUSG00000002900	Lamb1	6.48321	0.901611	2.84613	0	0
Fibroblasts	ENSMUSG00000026249	Serpine2	3.08123	0.432666	2.83218	0	0
Fibroblasts	ENSMUSG00000005397	Nid1	9.68546	1.36073	2.83144	0	0
Fibroblasts	ENSMUSG00000019899	Lama2	19.7791	2.91629	2.76177	0	0
Fibroblasts	ENSMUSG00000027859	Ngf	2.60309	0.384712	2.75837	0	0
Fibroblasts	ENSMUSG00000027204	Fbn1	8.44101	1.41635	2.57524	0	0
Fibroblasts	ENSMUSG00000031375	Bgn	9.96272	2.03664	2.29035	0	0
Fibroblasts	ENSMUSG00000024164	C3	15.9859	3.47385	2.20219	0	0
Fibroblasts	ENSMUSG00000026042	Col5a2	5.68083	1.29825	2.12954	0	0
Fibroblasts	ENSMUSG00000016494	Cd34	7.11208	1.62968	2.12569	0	0
Fibroblasts	ENSMUSG00000017493	Igfbp4	5.30264	1.26778	2.0644	0	0
Fibroblasts	ENSMUSG00000056427	Slit3	7.65896	2.23186	1.7789	0	0
Fibroblasts	ENSMUSG00000017466	Timp2	8.10223	2.81534	1.52501	0	0
Fibroblasts	ENSMUSG00000009281	Rarres2	4.12493	2.05338	1.00637	0	0
Fibroblasts	ENSMUSG00000022309	Angpt1	3.81551	1.0944	1.80173	8.06e-280	2.46e-275
Fibroblasts	ENSMUSG00000020053	Igf1	3.45626	0.743019	2.21774	4.51e-274	1.37e-269
Fibroblasts	ENSMUSG00000026399	Cd55	2.23321	0.444736	2.3281	2.42e-249	7.38e-245
Fibroblasts	ENSMUSG00000020467	Efemp1	2.60973	0.854982	1.60994	6.99e-240	2.13e-235
Fibroblasts	ENSMUSG00000031502	Col4a1	10.4762	5.2175	1.00568	2.23e-237	6.8e-233
Fibroblasts	ENSMUSG00000067158	Col4a4	2.85615	1.01826	1.48797	1.98e-226	6.04e-222
Fibroblasts	ENSMUSG00000003617	Cp	5.61131	2.56332	1.13032	3.82e-215	1.17e-210
Fibroblasts	ENSMUSG00000001870	Ltbp1	3.3323	1.38186	1.26991	3.02e-179	9.2e-175
Fibroblasts	ENSMUSG00000031555	Adam9	1.40406	0.624631	1.16853	9.41e-85	2.87e-80
Source(ligand)	Pair.Name	Ligand.ApprovedSymbol	Receptor.ApprovedSymbol	Target(receptor)	Gene ID	Gene Name	Target_Cluster_mean	Other_Cluster_mean	Log2FC	Pvalue	Qvalue
Fibroblasts	VCAN_ITGA4	VCAN	ITGA4	B_cell	ENSMUSG00000027009	Itga4	2.75293	0.398801	2.78723	7.05e-15	2.15e-10
Fibroblasts	VCAN_ITGA4	VCAN	ITGA4	Mono_Macro	ENSMUSG00000027009	Itga4	2.69783	0.101173	4.7369	0	0
Fibroblasts	VCAN_ITGA4	VCAN	ITGA4	T_cell	ENSMUSG00000027009	Itga4	6.90307	0.362463	4.25133	9.22e-79	2.81e-74
Fibroblasts	VCAN_EGFR	VCAN	EGFR	Fibroblasts	ENSMUSG00000020122	Egfr	6.55326	0.722124	3.1819	0	0
Fibroblasts	VCAN_CD44	VCAN	CD44	T_cell	ENSMUSG00000005087	Cd44	2.74094	0.336969	3.02398	1.28e-39	3.9e-35
Fibroblasts	PENK_OPRM1	PENK	OPRM1	T_cell	ENSMUSG00000000766	Oprm1	4.38756	0.0572037	6.26117	4.23e-217	1.29e-212
Fibroblasts	MFAP5_NOTCH1	MFAP5	NOTCH1	Endocardial_cells	ENSMUSG00000026923	Notch1	2.73342	0.708018	1.94885	2.46e-178	7.5e-174
Fibroblasts	MFAP5_NOTCH1	MFAP5	NOTCH1	Lymphatic_ECs	ENSMUSG00000026923	Notch1	2.28192	0.910131	1.3261	7.46e-17	2.27e-12
Fibroblasts	THBS2_ITGA4	THBS2	ITGA4	B_cell	ENSMUSG00000027009	Itga4	2.75293	0.398801	2.78723	7.05e-15	2.15e-10
Fibroblasts	THBS2_ITGA4	THBS2	ITGA4	Mono_Macro	ENSMUSG00000027009	Itga4	2.69783	0.101173	4.7369	0	0
Fibroblasts	THBS2_ITGA4	THBS2	ITGA4	T_cell	ENSMUSG00000027009	Itga4	6.90307	0.362463	4.25133	9.22e-79	2.81e-74
Fibroblasts	THBS2_ITGA6	THBS2	ITGA6	Endothelial_cells	ENSMUSG00000027111	Itga6	4.70343	0.628851	2.90292	0	0
Fibroblasts	THBS2_CD47	THBS2	CD47	Lymphatic_ECs	ENSMUSG00000055447	Cd47	5.90848	2.56471	1.20399	3.11e-25	9.46e-21
Fibroblasts	THBS2_CD47	THBS2	CD47	T_cell	ENSMUSG00000055447	Cd47	5.57502	2.59597	1.1027	3.35e-09	0.000102157
Fibroblasts	THBS2_NOTCH3	THBS2	NOTCH3	pericytes	ENSMUSG00000038146	Notch3	10.5616	0.303587	5.12058	0	0
Fibroblasts	THBS2_NOTCH3	THBS2	NOTCH3	Smooth_moscle_cells	ENSMUSG00000038146	Notch3	8.74772	0.615391	3.82933	1.87e-96	5.7e-92
Fibroblasts	COL1A1_CD93	COL1A1	CD93	Endocardial_cells	ENSMUSG00000027435	Cd93	3.64821	0.811003	2.16941	5.95e-233	1.81e-228
Fibroblasts	COL1A1_CD93	COL1A1	CD93	Endothelial_cells	ENSMUSG00000027435	Cd93	2.51768	0.771076	1.70715	2.59e-194	7.91e-190
Fibroblasts	COL1A1_DDR1	COL1A1	DDR1	Epicardial_cells	ENSMUSG00000003534	Ddr1	1.6336	0.181038	3.1737	1.93e-160	5.88e-156
Fibroblasts	COL1A1_CD44	COL1A1	CD44	T_cell	ENSMUSG00000005087	Cd44	2.74094	0.336969	3.02398	1.28e-39	3.9e-35
Fibroblasts	COL1A1_CD36	COL1A1	CD36	Endothelial_cells	ENSMUSG00000002944	Cd36	34.3082	6.58549	2.38119	0	0
Fibroblasts	COL1A1_DDR2	COL1A1	DDR2	Fibroblasts	ENSMUSG00000026674	Ddr2	2.46955	0.308376	3.00149	0	0
Fibroblasts	MMP2_SDC2	MMP2	SDC2	Fibroblasts	ENSMUSG00000022261	Sdc2	6.27014	0.798932	2.97235	0	0
Fibroblasts	SFRP1_FZD6	SFRP1	FZD6	Lymphatic_ECs	ENSMUSG00000022297	Fzd6	1.72059	0.433666	1.98825	1.99e-21	6.06e-17
Fibroblasts	DCN_ERBB4	DCN	ERBB4	Adipocytes	ENSMUSG00000062209	Erbb4	7.13456	1.35845	2.39286	6.65e-19	2.03e-14
Fibroblasts	DCN_ERBB4	DCN	ERBB4	Cardiomyocytes	ENSMUSG00000062209	Erbb4	5.76585	0.465361	3.63111	0	0
Fibroblasts	DCN_EGFR	DCN	EGFR	Fibroblasts	ENSMUSG00000020122	Egfr	6.55326	0.722124	3.1819	0	0
Fibroblasts	COL1A2_CD93	COL1A2	CD93	Endocardial_cells	ENSMUSG00000027435	Cd93	3.64821	0.811003	2.16941	5.95e-233	1.81e-228
Fibroblasts	COL1A2_CD93	COL1A2	CD93	Endothelial_cells	ENSMUSG00000027435	Cd93	2.51768	0.771076	1.70715	2.59e-194	7.91e-190
Fibroblasts	COL1A2_CD44	COL1A2	CD44	T_cell	ENSMUSG00000005087	Cd44	2.74094	0.336969	3.02398	1.28e-39	3.9e-35
Fibroblasts	COL1A2_CD36	COL1A2	CD36	Endothelial_cells	ENSMUSG00000002944	Cd36	34.3082	6.58549	2.38119	0	0
Fibroblasts	COL8A1_ITGA1	COL8A1	ITGA1	Endothelial_cells	ENSMUSG00000042284	Itga1	4.75659	1.13273	2.07013	0	0
Fibroblasts	COL8A1_ITGA1	COL8A1	ITGA1	pericytes	ENSMUSG00000042284	Itga1	7.8449	1.64036	2.25774	2.54e-125	7.75e-121
Fibroblasts	COL8A1_ITGA1	COL8A1	ITGA1	Smooth_moscle_cells	ENSMUSG00000042284	Itga1	4.43977	1.84514	1.26675	2.03e-09	6.19e-05
Fibroblasts	SERPING1_LRP1	SERPING1	LRP1	Fibroblasts	ENSMUSG00000040249	Lrp1	10.1141	1.22197	3.04909	0	0
Fibroblasts	COL3A1_DDR1	COL3A1	DDR1	Epicardial_cells	ENSMUSG00000003534	Ddr1	1.6336	0.181038	3.1737	1.93e-160	5.88e-156
Fibroblasts	COL3A1_DDR2	COL3A1	DDR2	Fibroblasts	ENSMUSG00000026674	Ddr2	2.46955	0.308376	3.00149	0	0
Fibroblasts	LAMB1_ITGA6	LAMB1	ITGA6	Endothelial_cells	ENSMUSG00000027111	Itga6	4.70343	0.628851	2.90292	0	0
Fibroblasts	SERPINE2_LRP1	SERPINE2	LRP1	Fibroblasts	ENSMUSG00000040249	Lrp1	10.1141	1.22197	3.04909	0	0
Fibroblasts	NID1_PTPRF	NID1	PTPRF	Epicardial_cells	ENSMUSG00000033295	Ptprf	1.62756	0.0909011	4.16227	1.44e-245	4.39e-241
Fibroblasts	LAMA2_ITGA7	LAMA2	ITGA7	pericytes	ENSMUSG00000025348	Itga7	1.62143	0.151914	3.41594	1.44e-125	4.4e-121
Fibroblasts	NGF_SORT1	NGF	SORT1	Adipocytes	ENSMUSG00000068747	Sort1	1.5984	0.245483	2.70294	1.7e-19	5.2e-15
Fibroblasts	NGF_SORT1	NGF	SORT1	Smooth_moscle_cells	ENSMUSG00000068747	Sort1	1.79163	0.237496	2.9153	9.51e-26	2.9e-21
Fibroblasts	C3_LRP1	C3	LRP1	Fibroblasts	ENSMUSG00000040249	Lrp1	10.1141	1.22197	3.04909	0	0
Fibroblasts	C3_C3AR1	C3	C3AR1	Mono_Macro	ENSMUSG00000040552	C3ar1	1.89961	0.0371781	5.67511	0	0
Fibroblasts	C3_ITGB2	C3	ITGB2	T_cell	ENSMUSG00000000290	Itgb2	2.0864	0.146436	3.83267	8.72e-69	2.66e-64
Fibroblasts	COL5A2_DDR1	COL5A2	DDR1	Epicardial_cells	ENSMUSG00000003534	Ddr1	1.6336	0.181038	3.1737	1.93e-160	5.88e-156
Fibroblasts	CD34_SELL	CD34	SELL	B_cell	ENSMUSG00000026581	Sell	3.77969	0.00675152	9.12884	0	0
Fibroblasts	IGFBP4_LRP6	IGFBP4	LRP6	Mono_Macro	ENSMUSG00000030201	Lrp6	3.39535	1.28955	1.39669	1.06e-81	3.23e-77
Fibroblasts	ANGPT1_TEK	ANGPT1	TEK	Endocardial_cells	ENSMUSG00000006386	Tek	4.7634	1.61583	1.55971	1.62e-154	4.94e-150
Fibroblasts	ANGPT1_TEK	ANGPT1	TEK	Endothelial_cells	ENSMUSG00000006386	Tek	3.73634	1.5142	1.30307	9.86e-139	3.01e-134
Fibroblasts	ANGPT1_TIE1	ANGPT1	TIE1	Endocardial_cells	ENSMUSG00000033191	Tie1	2.16696	0.821187	1.39989	1.86e-106	5.68e-102
Fibroblasts	ANGPT1_TIE1	ANGPT1	TIE1	Endothelial_cells	ENSMUSG00000033191	Tie1	2.84466	0.495765	2.52053	0	0
Fibroblasts	ANGPT1_TIE1	ANGPT1	TIE1	Lymphatic_ECs	ENSMUSG00000033191	Tie1	2.43483	0.946771	1.36273	1.42e-21	4.32e-17
Fibroblasts	EFEMP1_EGFR	EFEMP1	EGFR	Fibroblasts	ENSMUSG00000020122	Egfr	6.55326	0.722124	3.1819	0	0
Fibroblasts	COL4A1_CD93	COL4A1	CD93	Endocardial_cells	ENSMUSG00000027435	Cd93	3.64821	0.811003	2.16941	5.95e-233	1.81e-228
Fibroblasts	COL4A1_CD93	COL4A1	CD93	Endothelial_cells	ENSMUSG00000027435	Cd93	2.51768	0.771076	1.70715	2.59e-194	7.91e-190
Fibroblasts	COL4A1_ITGA1	COL4A1	ITGA1	Endothelial_cells	ENSMUSG00000042284	Itga1	4.75659	1.13273	2.07013	0	0
Fibroblasts	COL4A1_ITGA1	COL4A1	ITGA1	pericytes	ENSMUSG00000042284	Itga1	7.8449	1.64036	2.25774	2.54e-125	7.75e-121
Fibroblasts	COL4A1_ITGA1	COL4A1	ITGA1	Smooth_moscle_cells	ENSMUSG00000042284	Itga1	4.43977	1.84514	1.26675	2.03e-09	6.19e-05
Fibroblasts	COL4A4_CD93	COL4A4	CD93	Endocardial_cells	ENSMUSG00000027435	Cd93	3.64821	0.811003	2.16941	5.95e-233	1.81e-228
Fibroblasts	COL4A4_CD93	COL4A4	CD93	Endothelial_cells	ENSMUSG00000027435	Cd93	2.51768	0.771076	1.70715	2.59e-194	7.91e-190
Fibroblasts	LTBP1_ITGB5	LTBP1	ITGB5	Fibroblasts	ENSMUSG00000022817	Itgb5	2.25184	0.691712	1.70286	1.39e-207	4.24e-203
Fibroblasts	ADAM9_ITGA6	ADAM9	ITGA6	Endothelial_cells	ENSMUSG00000027111	Itga6	4.70343	0.628851	2.90292	0	0
Fibroblasts	ADAM9_ITGB5	ADAM9	ITGB5	Fibroblasts	ENSMUSG00000022817	Itgb5	2.25184	0.691712	1.70286	1.39e-207	4.24e-203

## Sheet: Sheet8
Target_Cluster	Gene ID	Gene Name	Target_Cluster_mean	Other_Cluster_mean	Log2FC	Pvalue	Qvalue
Lymphatic_ECs	ENSMUSG00000042453	Reln	19.3011	0.0381928	8.98117	0	0
Lymphatic_ECs	ENSMUSG00000026822	Lcn2	5.92034	0.0278377	7.7325	0	0
Lymphatic_ECs	ENSMUSG00000040254	Sema3d	6.05879	0.385281	3.97505	3.29e-233	1e-228
Lymphatic_ECs	ENSMUSG00000040329	Il7	2.22205	0.0963678	4.5272	2.87e-209	8.74e-205
Lymphatic_ECs	ENSMUSG00000028883	Sema3a	3.46843	0.140357	4.62711	3.5e-206	1.07e-201
Lymphatic_ECs	ENSMUSG00000019890	Nts	2.06565	0.10088	4.35588	1.82e-144	5.55e-140
Lymphatic_ECs	ENSMUSG00000054555	Adam12	2.68668	0.112363	4.57959	4.92e-122	1.5e-117
Lymphatic_ECs	ENSMUSG00000020902	Ntn1	8.83876	1.11393	2.98818	2.94e-115	8.95e-111
Lymphatic_ECs	ENSMUSG00000039405	Prss23	4.67678	0.518826	3.17219	3.84e-89	1.17e-84
Lymphatic_ECs	ENSMUSG00000034684	Sema3f	1.7029	0.140129	3.60316	1.38e-85	4.22e-81
Lymphatic_ECs	ENSMUSG00000020044	Timp3	20.2616	3.71379	2.44778	4.49e-81	1.37e-76
Lymphatic_ECs	ENSMUSG00000019647	Sema6a	10.7362	1.96014	2.45345	1.1e-78	3.35e-74
Lymphatic_ECs	ENSMUSG00000001435	Col18a1	2.29159	0.216973	3.40076	1.87e-64	5.71e-60
Lymphatic_ECs	ENSMUSG00000003617	Cp	14.1413	3.27604	2.10989	3.67e-60	1.12e-55
Lymphatic_ECs	ENSMUSG00000022912	Pros1	2.86204	0.889651	1.68573	3.12e-30	9.52e-26
Lymphatic_ECs	ENSMUSG00000025608	Podxl	3.14963	1.29559	1.28157	2.31e-28	7.03e-24
Lymphatic_ECs	ENSMUSG00000001300	Efnb2	2.41491	0.654306	1.88393	4.26e-24	1.3e-19
Lymphatic_ECs	ENSMUSG00000037820	Tgm2	2.24402	0.747988	1.585	2.21e-23	6.73e-19
Lymphatic_ECs	ENSMUSG00000001029	Icam2	2.58362	0.98721	1.38796	4.39e-22	1.34e-17
Lymphatic_ECs	ENSMUSG00000054693	Adam10	3.90168	1.51115	1.36845	3.02e-20	9.21e-16
Lymphatic_ECs	ENSMUSG00000026728	Vim	7.77992	3.79427	1.03593	2.6e-14	7.93e-10
Source(ligand)	Pair.Name	Ligand.ApprovedSymbol	Receptor.ApprovedSymbol	Target(receptor)	Gene ID	Gene Name	Target_Cluster_mean	Other_Cluster_mean	Log2FC	Pvalue	Qvalue
Lymphatic_ECs	RELN_VLDLR	RELN	VLDLR	Cardiomyocytes	ENSMUSG00000024924	Vldlr	3.08654	0.682621	2.17683	4.37e-241	1.33e-236
Lymphatic_ECs	LCN2_LRP2	LCN2	LRP2	Epicardial_cells	ENSMUSG00000027070	Lrp2	3.16644	0.0129629	7.93233	0	0
Lymphatic_ECs	SEMA3D_NRP1	SEMA3D	NRP1	Endocardial_cells	ENSMUSG00000025810	Nrp1	13.3467	5.63315	1.24447	2.88e-117	8.78e-113
Lymphatic_ECs	SEMA3D_NRP1	SEMA3D	NRP1	Endothelial_cells	ENSMUSG00000025810	Nrp1	12.3705	4.99507	1.30833	3.65e-296	1.11e-291
Lymphatic_ECs	IL7_IL2RG	IL7	IL2RG	T_cell	ENSMUSG00000031304	Il2rg	1.58561	0.132464	3.58137	2.24e-46	6.82e-42
Lymphatic_ECs	IL7_IL7R	IL7	IL7R	T_cell	ENSMUSG00000003882	Il7r	9.8503	0.00637997	10.5924	0	0
Lymphatic_ECs	SEMA3A_NRP1	SEMA3A	NRP1	Endocardial_cells	ENSMUSG00000025810	Nrp1	13.3467	5.63315	1.24447	2.88e-117	8.78e-113
Lymphatic_ECs	SEMA3A_NRP1	SEMA3A	NRP1	Endothelial_cells	ENSMUSG00000025810	Nrp1	12.3705	4.99507	1.30833	3.65e-296	1.11e-291
Lymphatic_ECs	SEMA3A_NRP2	SEMA3A	NRP2	Endothelial_cells	ENSMUSG00000025969	Nrp2	5.14016	1.159	2.14893	3.23e-280	9.86e-276
Lymphatic_ECs	SEMA3A_NRP2	SEMA3A	NRP2	Lymphatic_ECs	ENSMUSG00000025969	Nrp2	12.2358	1.80393	2.76189	5.73e-91	1.75e-86
Lymphatic_ECs	SEMA3A_PLXNA2	SEMA3A	PLXNA2	Endothelial_cells	ENSMUSG00000026640	Plxna2	3.74368	0.978996	1.93508	4.41e-215	1.34e-210
Lymphatic_ECs	SEMA3A_PLXNA4	SEMA3A	PLXNA4	Endocardial_cells	ENSMUSG00000029765	Plxna4	6.79753	2.53995	1.42021	6.49e-230	1.98e-225
Lymphatic_ECs	SEMA3A_PLXNA4	SEMA3A	PLXNA4	Epicardial_cells	ENSMUSG00000029765	Plxna4	26.3201	2.02779	3.69818	0	0
Lymphatic_ECs	NTS_SORT1	NTS	SORT1	Adipocytes	ENSMUSG00000068747	Sort1	1.5984	0.245483	2.70294	1.7e-19	5.2e-15
Lymphatic_ECs	NTS_SORT1	NTS	SORT1	Smooth_moscle_cells	ENSMUSG00000068747	Sort1	1.79163	0.237496	2.9153	9.51e-26	2.9e-21
Lymphatic_ECs	ADAM12_ITGA9	ADAM12	ITGA9	Lymphatic_ECs	ENSMUSG00000039115	Itga9	6.64459	1.39688	2.24997	6.7e-53	2.04e-48
Lymphatic_ECs	ADAM12_ITGA9	ADAM12	ITGA9	Mono_Macro	ENSMUSG00000039115	Itga9	3.329	1.23087	1.43541	1.72e-100	5.24e-96
Lymphatic_ECs	ADAM12_SDC4	ADAM12	SDC4	Epicardial_cells	ENSMUSG00000017009	Sdc4	1.75583	0.287117	2.61245	5.68e-108	1.73e-103
Lymphatic_ECs	NTN1_NEO1	NTN1	NEO1	Cardiomyocytes	ENSMUSG00000032340	Neo1	1.69331	0.788357	1.10293	5.08e-54	1.55e-49
Lymphatic_ECs	NTN1_NEO1	NTN1	NEO1	Epicardial_cells	ENSMUSG00000032340	Neo1	4.77086	0.781885	2.60922	5.26e-167	1.6e-162
Lymphatic_ECs	SEMA3F_NRP1	SEMA3F	NRP1	Endocardial_cells	ENSMUSG00000025810	Nrp1	13.3467	5.63315	1.24447	2.88e-117	8.78e-113
Lymphatic_ECs	SEMA3F_NRP1	SEMA3F	NRP1	Endothelial_cells	ENSMUSG00000025810	Nrp1	12.3705	4.99507	1.30833	3.65e-296	1.11e-291
Lymphatic_ECs	SEMA3F_NRP2	SEMA3F	NRP2	Endothelial_cells	ENSMUSG00000025969	Nrp2	5.14016	1.159	2.14893	3.23e-280	9.86e-276
Lymphatic_ECs	SEMA3F_NRP2	SEMA3F	NRP2	Lymphatic_ECs	ENSMUSG00000025969	Nrp2	12.2358	1.80393	2.76189	5.73e-91	1.75e-86
Lymphatic_ECs	TIMP3_KDR	TIMP3	KDR	Endothelial_cells	ENSMUSG00000062960	Kdr	8.10878	1.02078	2.98981	0	0
Lymphatic_ECs	TIMP3_KDR	TIMP3	KDR	Lymphatic_ECs	ENSMUSG00000062960	Kdr	7.355	2.37433	1.63121	5.12e-46	1.56e-41
Lymphatic_ECs	SEMA6A_PLXNA2	SEMA6A	PLXNA2	Endothelial_cells	ENSMUSG00000026640	Plxna2	3.74368	0.978996	1.93508	4.41e-215	1.34e-210
Lymphatic_ECs	SEMA6A_PLXNA4	SEMA6A	PLXNA4	Endocardial_cells	ENSMUSG00000029765	Plxna4	6.79753	2.53995	1.42021	6.49e-230	1.98e-225
Lymphatic_ECs	SEMA6A_PLXNA4	SEMA6A	PLXNA4	Epicardial_cells	ENSMUSG00000029765	Plxna4	26.3201	2.02779	3.69818	0	0
Lymphatic_ECs	COL18A1_KDR	COL18A1	KDR	Endothelial_cells	ENSMUSG00000062960	Kdr	8.10878	1.02078	2.98981	0	0
Lymphatic_ECs	COL18A1_KDR	COL18A1	KDR	Lymphatic_ECs	ENSMUSG00000062960	Kdr	7.355	2.37433	1.63121	5.12e-46	1.56e-41
Lymphatic_ECs	PROS1_AXL	PROS1	AXL	Fibroblasts	ENSMUSG00000002602	Axl	3.91959	0.43826	3.16084	0	0
Lymphatic_ECs	PODXL_SELL	PODXL	SELL	B_cell	ENSMUSG00000026581	Sell	3.77969	0.00675152	9.12884	0	0
Lymphatic_ECs	EFNB2_EPHA4	EFNB2	EPHA4	Endocardial_cells	ENSMUSG00000026235	Epha4	1.90394	0.950858	1.00169	9.07e-47	2.76e-42
Lymphatic_ECs	EFNB2_EPHB2	EFNB2	EPHB2	Schwann_cells	ENSMUSG00000028664	Ephb2	2.11915	0.02294	6.52948	3.47e-109	1.06e-104
Lymphatic_ECs	EFNB2_EPHB4	EFNB2	EPHB4	Endocardial_cells	ENSMUSG00000029710	Ephb4	1.93456	0.521337	1.89171	9.28e-137	2.83e-132
Lymphatic_ECs	EFNB2_EPHB4	EFNB2	EPHB4	Lymphatic_ECs	ENSMUSG00000029710	Ephb4	1.46619	0.664713	1.14127	5.25e-11	1.6e-06
Lymphatic_ECs	EFNB2_GRM1	EFNB2	GRM1	Cardiomyocytes	ENSMUSG00000019828	Grm1	8.39989	0.19869	5.40178	0	0
Lymphatic_ECs	EFNB2_PECAM1	EFNB2	PECAM1	Endocardial_cells	ENSMUSG00000020717	Pecam1	14.8386	2.54784	2.54201	0	0
Lymphatic_ECs	EFNB2_PECAM1	EFNB2	PECAM1	Endothelial_cells	ENSMUSG00000020717	Pecam1	8.46541	2.74745	1.62349	0	0
Lymphatic_ECs	TGM2_SDC4	TGM2	SDC4	Epicardial_cells	ENSMUSG00000017009	Sdc4	1.75583	0.287117	2.61245	5.68e-108	1.73e-103
Lymphatic_ECs	ICAM2_ITGB2	ICAM2	ITGB2	T_cell	ENSMUSG00000000290	Itgb2	2.0864	0.146436	3.83267	8.72e-69	2.66e-64
Lymphatic_ECs	ICAM2_ITGAL	ICAM2	ITGAL	T_cell	ENSMUSG00000030830	Itgal	3.31786	0.0173072	7.58273	0	0
Lymphatic_ECs	ADAM10_AXL	ADAM10	AXL	Fibroblasts	ENSMUSG00000002602	Axl	3.91959	0.43826	3.16084	0	0
Lymphatic_ECs	VIM_CD44	VIM	CD44	T_cell	ENSMUSG00000005087	Cd44	2.74094	0.336969	3.02398	1.28e-39	3.9e-35

## Sheet: Sheet9
Target_Cluster	Gene ID	Gene Name	Target_Cluster_mean	Other_Cluster_mean	Log2FC	Pvalue	Qvalue
Mono_Macro	ENSMUSG00000039109	F13a1	27.8769	0.31106	6.48573	0	0
Mono_Macro	ENSMUSG00000036887	C1qa	31.7826	0.461342	6.10626	0	0
Mono_Macro	ENSMUSG00000021423	Ly86	3.17755	0.0468527	6.08364	0	0
Mono_Macro	ENSMUSG00000036905	C1qb	27.3416	0.430177	5.99002	0	0
Mono_Macro	ENSMUSG00000029373	Pf4	12.4647	0.398453	4.96729	0	0
Mono_Macro	ENSMUSG00000017754	Pltp	6.78755	0.722248	3.23233	0	0
Mono_Macro	ENSMUSG00000002985	Apoe	97.4887	18.6323	2.38743	0	0
Mono_Macro	ENSMUSG00000004207	Psap	9.09313	4.21368	1.1097	4.14e-113	1.26e-108
Mono_Macro	ENSMUSG00000020458	Rtn4	4.89624	2.112	1.21307	9.32e-97	2.84e-92
Source(ligand)	Pair.Name	Ligand.ApprovedSymbol	Receptor.ApprovedSymbol	Target(receptor)	Gene ID	Gene Name	Target_Cluster_mean	Other_Cluster_mean	Log2FC	Pvalue	Qvalue
Mono_Macro	F13A1_ITGA9	F13A1	ITGA9	Lymphatic_ECs	ENSMUSG00000039115	Itga9	6.64459	1.39688	2.24997	6.7e-53	2.04e-48
Mono_Macro	F13A1_ITGA9	F13A1	ITGA9	Mono_Macro	ENSMUSG00000039115	Itga9	3.329	1.23087	1.43541	1.72e-100	5.24e-96
Mono_Macro	F13A1_ITGA4	F13A1	ITGA4	B_cell	ENSMUSG00000027009	Itga4	2.75293	0.398801	2.78723	7.05e-15	2.15e-10
Mono_Macro	F13A1_ITGA4	F13A1	ITGA4	Mono_Macro	ENSMUSG00000027009	Itga4	2.69783	0.101173	4.7369	0	0
Mono_Macro	F13A1_ITGA4	F13A1	ITGA4	T_cell	ENSMUSG00000027009	Itga4	6.90307	0.362463	4.25133	9.22e-79	2.81e-74
Mono_Macro	C1QA_CD93	C1QA	CD93	Endocardial_cells	ENSMUSG00000027435	Cd93	3.64821	0.811003	2.16941	5.95e-233	1.81e-228
Mono_Macro	C1QA_CD93	C1QA	CD93	Endothelial_cells	ENSMUSG00000027435	Cd93	2.51768	0.771076	1.70715	2.59e-194	7.91e-190
Mono_Macro	C1QA_CSPG4	C1QA	CSPG4	pericytes	ENSMUSG00000032911	Cspg4	4.59431	0.108426	5.40507	0	0
Mono_Macro	C1QA_CSPG4	C1QA	CSPG4	Smooth_moscle_cells	ENSMUSG00000032911	Cspg4	1.7171	0.259397	2.72674	4.17e-37	1.27e-32
Mono_Macro	C1QB_LRP1	C1QB	LRP1	Fibroblasts	ENSMUSG00000040249	Lrp1	10.1141	1.22197	3.04909	0	0
Mono_Macro	PF4_SDC2	PF4	SDC2	Fibroblasts	ENSMUSG00000022261	Sdc2	6.27014	0.798932	2.97235	0	0
Mono_Macro	PF4_THBD	PF4	THBD	Lymphatic_ECs	ENSMUSG00000074743	Thbd	1.52788	0.616869	1.3085	1.37e-13	4.16e-09
Mono_Macro	PLTP_ABCA1	PLTP	ABCA1	Lymphatic_ECs	ENSMUSG00000015243	Abca1	3.77484	1.35867	1.47422	4.01e-22	1.22e-17
Mono_Macro	PLTP_ABCA1	PLTP	ABCA1	Mono_Macro	ENSMUSG00000015243	Abca1	4.82173	0.941575	2.3564	1.37e-257	4.17e-253
Mono_Macro	APOE_LRP1	APOE	LRP1	Fibroblasts	ENSMUSG00000040249	Lrp1	10.1141	1.22197	3.04909	0	0
Mono_Macro	APOE_LRP2	APOE	LRP2	Epicardial_cells	ENSMUSG00000027070	Lrp2	3.16644	0.0129629	7.93233	0	0
Mono_Macro	APOE_SORL1	APOE	SORL1	B_cell	ENSMUSG00000049313	Sorl1	2.61253	0.0898356	4.86202	4.08e-38	1.24e-33
Mono_Macro	APOE_SORL1	APOE	SORL1	T_cell	ENSMUSG00000049313	Sorl1	1.87407	0.0846236	4.46897	1.85e-68	5.64e-64
Mono_Macro	APOE_VLDLR	APOE	VLDLR	Cardiomyocytes	ENSMUSG00000024924	Vldlr	3.08654	0.682621	2.17683	4.37e-241	1.33e-236
Mono_Macro	PSAP_LRP1	PSAP	LRP1	Fibroblasts	ENSMUSG00000040249	Lrp1	10.1141	1.22197	3.04909	0	0
Mono_Macro	PSAP_GPR37L1	PSAP	GPR37L1	Schwann_cells	ENSMUSG00000026424	Gpr37l1	1.75876	0.00119621	10.5219	0	0

[truncated: 5 more sheets: Sheet10, Sheet11, Sheet12, Sheet13, Sheet14]
