# Supplementary material for: Single-cell RNA-seq of heart reveals intercellular communication drivers of myocardial fibrosis in diabetic cardiomyopathy
Source: eLife. 2023 Apr 3;12:e80479. doi: 10.7554/eLife.80479 (PMC10110238; doi:10.7554/eLife.80479)
Supplement: Supplementary file 10. [file elife-80479-supp10.xls]

## Sheet: Sheet16
Supplementary file 10: Ligand-receptor pairs among the cardiac cell populations in the healthy mice

## Sheet: Sheet1
Supplemmentary file 10: ligand–receptor pairs between cardiac cell populations in healthy mice.
Target_Cluster	Gene ID	Gene Name	Target_Cluster_mean	Other_Cluster_mean	Log2FC	Pvalue	Qvalue
Adipocytes	ENSMUSG00000022878	Adipoq	5.66497	0.00592075	9.90207	0	0
Adipocytes	ENSMUSG00000031722	Hp	10.0999	0.0342113	8.20566	3.99e-275	1.22e-270
Adipocytes	ENSMUSG00000032311	Nrg4	9.00599	0.0646956	7.12107	1.39e-46	4.24e-42
Adipocytes	ENSMUSG00000054555	Adam12	10.7074	0.295737	5.17815	3.65e-27	1.11e-22
Adipocytes	ENSMUSG00000021732	Fgf10	2.66399	0.195711	3.76679	2.43e-10	7.4e-06
Adipocytes	ENSMUSG00000023951	Vegfa	5.93442	0.966873	2.61771	1.02e-07	0.00309501
Source(ligand)	Pair.Name	Ligand.ApprovedSymbol	Receptor.ApprovedSymbol	Target(receptor)	Gene ID	Gene Name	Target_Cluster_mean	Other_Cluster_mean	Log2FC	Pvalue	Qvalue
Adipocytes	ADIPOQ_ADIPOR2	ADIPOQ	ADIPOR2	Endothelial_cells	ENSMUSG00000030168	Adipor2	2.88604	0.793425	1.86292	3.75e-177	1.14e-172
Adipocytes	HP_ITGB2	HP	ITGB2	T_cell	ENSMUSG00000000290	Itgb2	3.00613	0.155362	4.2742	1.44e-67	4.4e-63
Adipocytes	NRG4_ERBB4	NRG4	ERBB4	Adipocytes	ENSMUSG00000062209	Erbb4	15.5066	1.81208	3.09716	2.18e-12	6.65e-08
Adipocytes	NRG4_ERBB4	NRG4	ERBB4	Cardiomyocytes	ENSMUSG00000062209	Erbb4	9.13353	0.519076	4.13716	0	0
Adipocytes	ADAM12_ITGA9	ADAM12	ITGA9	Endocardial_cells	ENSMUSG00000039115	Itga9	3.12875	1.19805	1.38489	8.39e-76	2.56e-71
Adipocytes	ADAM12_ITGA9	ADAM12	ITGA9	Lymphatic_ECs	ENSMUSG00000039115	Itga9	7.63646	1.29667	2.55809	2.1e-56	6.41e-52
Adipocytes	ADAM12_ITGA9	ADAM12	ITGA9	Mono_Macro	ENSMUSG00000039115	Itga9	2.58351	1.19615	1.11094	4.81e-46	1.47e-41
Adipocytes	ADAM12_SDC4	ADAM12	SDC4	Epicardial_cells	ENSMUSG00000017009	Sdc4	1.68836	0.252868	2.73916	1.2e-75	3.67e-71
Adipocytes	ADAM12_SDC4	ADAM12	SDC4	Schwann_cells	ENSMUSG00000017009	Sdc4	2.0625	0.287659	2.84196	6.25e-08	0.00190526
Adipocytes	FGF10_FGFR2	FGF10	FGFR2	Cardiomyocytes	ENSMUSG00000030849	Fgfr2	12.145	3.59492	1.75632	3.41e-73	1.04e-68
Adipocytes	VEGFA_KDR	VEGFA	KDR	Endothelial_cells	ENSMUSG00000062960	Kdr	9.58148	0.764645	3.64739	0	0
Adipocytes	VEGFA_KDR	VEGFA	KDR	Lymphatic_ECs	ENSMUSG00000062960	Kdr	5.99933	2.93385	1.03201	1.23e-27	3.74e-23
Adipocytes	VEGFA_EPHB2	VEGFA	EPHB2	Schwann_cells	ENSMUSG00000028664	Ephb2	4.10633	0.0217325	7.56185	8.27e-194	2.52e-189
Adipocytes	VEGFA_NRP1	VEGFA	NRP1	Endothelial_cells	ENSMUSG00000025810	Nrp1	14.1382	5.24135	1.43159	0	0
Adipocytes	VEGFA_NRP2	VEGFA	NRP2	Endothelial_cells	ENSMUSG00000025969	Nrp2	5.89271	1.12525	2.38869	0	0
Adipocytes	VEGFA_NRP2	VEGFA	NRP2	Lymphatic_ECs	ENSMUSG00000025969	Nrp2	12.8226	2.1986	2.54403	2.28e-53	6.96e-49
Adipocytes	VEGFA_FLT1	VEGFA	FLT1	Endocardial_cells	ENSMUSG00000029648	Flt1	11.4222	5.37201	1.0883	1.12e-221	3.43e-217
Adipocytes	VEGFA_FLT1	VEGFA	FLT1	Endothelial_cells	ENSMUSG00000029648	Flt1	18.1568	1.81902	3.31927	0	0

## Sheet: Sheet2
Target_Cluster	Gene ID	Gene Name	Target_Cluster_mean	Other_Cluster_mean	Log2FC	Pvalue	Qvalue
B_cell	ENSMUSG00000024399	Ltb	3.99038	0.0259932	7.26225	0	0
B_cell	ENSMUSG00000052013	Btla	12.3777	0.0372146	8.37766	0	0
B_cell	ENSMUSG00000026399	Cd55	9.36321	0.899171	3.38034	8.19e-29	2.5e-24
B_cell	ENSMUSG00000021423	Ly86	5.39521	0.634456	3.08809	4.62e-28	1.41e-23
B_cell	ENSMUSG00000053219	Raet1e	2.69703	0.177728	3.92362	4.54e-23	1.38e-18
B_cell	ENSMUSG00000033544	Angptl1	2.42959	0.159267	3.9312	4.01e-19	1.22e-14
Source(ligand)	Pair.Name	Ligand.ApprovedSymbol	Receptor.ApprovedSymbol	Target(receptor)	Gene ID	Gene Name	Target_Cluster_mean	Other_Cluster_mean	Log2FC	Pvalue	Qvalue
B_cell	BTLA_CD79A	BTLA	CD79A	B_cell	ENSMUSG00000003379	Cd79a	12.9364	0.00529897	11.2534	0	0
B_cell	BTLA_VTCN1	BTLA	VTCN1	Epicardial_cells	ENSMUSG00000051076	Vtcn1	2.30549	0.00520651	8.79054	0	0
B_cell	LY86_CD180	LY86	CD180	B_cell	ENSMUSG00000021624	Cd180	1.91867	0.156815	3.61298	9.78e-17	2.98e-12
B_cell	RAET1E_KLRK1	RAET1E	KLRK1	T_cell	ENSMUSG00000030149	Klrk1	8.33201	0.0132036	9.30159	0	0
B_cell	ANGPTL1_TEK	ANGPTL1	TEK	Endocardial_cells	ENSMUSG00000006386	Tek	6.47664	1.99293	1.70035	5.49e-199	1.67e-194
B_cell	ANGPTL1_TEK	ANGPTL1	TEK	Endothelial_cells	ENSMUSG00000006386	Tek	4.41416	1.70964	1.36845	7.48e-202	2.28e-197

## Sheet: Sheet3
Target_Cluster	Gene ID	Gene Name	Target_Cluster_mean	Other_Cluster_mean	Log2FC	Pvalue	Qvalue
Cardiomyocytes	ENSMUSG00000031137	Fgf13	18.5773	0.411195	5.49757	0	0
Cardiomyocytes	ENSMUSG00000023951	Vegfa	4.54285	0.334104	3.76523	0	0
Cardiomyocytes	ENSMUSG00000036585	Fgf1	3.18	0.319494	3.31517	0	0
Cardiomyocytes	ENSMUSG00000015568	Lpl	23.3527	6.33174	1.88292	0	0
Cardiomyocytes	ENSMUSG00000029019	Nppb	4.80432	0.561566	3.09681	6.26e-227	1.91e-222
Cardiomyocytes	ENSMUSG00000025006	Sorbs1	13.7216	3.40452	2.01093	6.29e-225	1.92e-220
Cardiomyocytes	ENSMUSG00000024962	Vegfb	1.72416	0.722271	1.25528	4.97e-74	1.52e-69
Cardiomyocytes	ENSMUSG00000022309	Angpt1	3.93989	1.31976	1.57788	2.59e-72	7.89e-68
Cardiomyocytes	ENSMUSG00000041616	Nppa	32.6587	2.75486	3.56741	1.27e-11	3.86e-07
Source(ligand)	Pair.Name	Ligand.ApprovedSymbol	Receptor.ApprovedSymbol	Target(receptor)	Gene ID	Gene Name	Target_Cluster_mean	Other_Cluster_mean	Log2FC	Pvalue	Qvalue
Cardiomyocytes	FGF13_SCN5A	FGF13	SCN5A	Cardiomyocytes	ENSMUSG00000032511	Scn5a	3.20521	0.156124	4.35966	0	0
Cardiomyocytes	VEGFA_KDR	VEGFA	KDR	Endothelial_cells	ENSMUSG00000062960	Kdr	9.58148	0.764645	3.64739	0	0
Cardiomyocytes	VEGFA_KDR	VEGFA	KDR	Lymphatic_ECs	ENSMUSG00000062960	Kdr	5.99933	2.93385	1.03201	1.23e-27	3.74e-23
Cardiomyocytes	VEGFA_EPHB2	VEGFA	EPHB2	Schwann_cells	ENSMUSG00000028664	Ephb2	4.10633	0.0217325	7.56185	8.27e-194	2.52e-189
Cardiomyocytes	VEGFA_NRP1	VEGFA	NRP1	Endothelial_cells	ENSMUSG00000025810	Nrp1	14.1382	5.24135	1.43159	0	0
Cardiomyocytes	VEGFA_NRP2	VEGFA	NRP2	Endothelial_cells	ENSMUSG00000025969	Nrp2	5.89271	1.12525	2.38869	0	0
Cardiomyocytes	VEGFA_NRP2	VEGFA	NRP2	Lymphatic_ECs	ENSMUSG00000025969	Nrp2	12.8226	2.1986	2.54403	2.28e-53	6.96e-49
Cardiomyocytes	VEGFA_FLT1	VEGFA	FLT1	Endocardial_cells	ENSMUSG00000029648	Flt1	11.4222	5.37201	1.0883	1.12e-221	3.43e-217
Cardiomyocytes	VEGFA_FLT1	VEGFA	FLT1	Endothelial_cells	ENSMUSG00000029648	Flt1	18.1568	1.81902	3.31927	0	0
Cardiomyocytes	FGF1_FGFR2	FGF1	FGFR2	Cardiomyocytes	ENSMUSG00000030849	Fgfr2	12.145	3.59492	1.75632	3.41e-73	1.04e-68
Cardiomyocytes	FGF1_FGFR1	FGF1	FGFR1	Fibroblasts	ENSMUSG00000031565	Fgfr1	3.15525	0.591433	2.41547	0	0
Cardiomyocytes	FGF1_NRP1	FGF1	NRP1	Endothelial_cells	ENSMUSG00000025810	Nrp1	14.1382	5.24135	1.43159	0	0
Cardiomyocytes	LPL_LRP1	LPL	LRP1	Fibroblasts	ENSMUSG00000040249	Lrp1	10.3294	1.4082	2.87483	0	0
Cardiomyocytes	LPL_LRP2	LPL	LRP2	Epicardial_cells	ENSMUSG00000027070	Lrp2	4.50823	0.0131909	8.41688	0	0
Cardiomyocytes	LPL_VLDLR	LPL	VLDLR	Cardiomyocytes	ENSMUSG00000024924	Vldlr	3.54389	0.494947	2.83999	0	0
Cardiomyocytes	LPL_GPIHBP1	LPL	GPIHBP1	Endothelial_cells	ENSMUSG00000022579	Gpihbp1	8.63382	0.406854	4.40742	0	0
Cardiomyocytes	NPPB_NPR3	NPPB	NPR3	Endocardial_cells	ENSMUSG00000022206	Npr3	24.9464	0.53388	5.54617	0	0
Cardiomyocytes	SORBS1_INSR	SORBS1	INSR	Cardiomyocytes	ENSMUSG00000005534	Insr	3.69935	1.5095	1.2932	2.25e-89	6.87e-85
Cardiomyocytes	VEGFB_NRP1	VEGFB	NRP1	Endothelial_cells	ENSMUSG00000025810	Nrp1	14.1382	5.24135	1.43159	0	0
Cardiomyocytes	VEGFB_FLT1	VEGFB	FLT1	Endocardial_cells	ENSMUSG00000029648	Flt1	11.4222	5.37201	1.0883	1.12e-221	3.43e-217
Cardiomyocytes	VEGFB_FLT1	VEGFB	FLT1	Endothelial_cells	ENSMUSG00000029648	Flt1	18.1568	1.81902	3.31927	0	0
Cardiomyocytes	ANGPT1_TEK	ANGPT1	TEK	Endocardial_cells	ENSMUSG00000006386	Tek	6.47664	1.99293	1.70035	5.49e-199	1.67e-194
Cardiomyocytes	ANGPT1_TEK	ANGPT1	TEK	Endothelial_cells	ENSMUSG00000006386	Tek	4.41416	1.70964	1.36845	7.48e-202	2.28e-197
Cardiomyocytes	ANGPT1_TIE1	ANGPT1	TIE1	Endocardial_cells	ENSMUSG00000033191	Tie1	2.77406	0.944785	1.55394	4.66e-159	1.42e-154
Cardiomyocytes	ANGPT1_TIE1	ANGPT1	TIE1	Endothelial_cells	ENSMUSG00000033191	Tie1	2.99081	0.476675	2.64946	0	0
Cardiomyocytes	ANGPT1_TIE1	ANGPT1	TIE1	Lymphatic_ECs	ENSMUSG00000033191	Tie1	2.65419	1.08754	1.28721	2.5e-22	7.63e-18
Cardiomyocytes	NPPA_NPR3	NPPA	NPR3	Endocardial_cells	ENSMUSG00000022206	Npr3	24.9464	0.53388	5.54617	0	0

## Sheet: Sheet4
Target_Cluster	Gene ID	Gene Name	Target_Cluster_mean	Other_Cluster_mean	Log2FC	Pvalue	Qvalue
Endocardial_cells	ENSMUSG00000062991	Nrg1	7.82899	0.060253	7.02165	0	0
Endocardial_cells	ENSMUSG00000022868	Ahsg	3.55482	0.0815908	5.44523	0	0
Endocardial_cells	ENSMUSG00000001930	Vwf	18.7655	0.491691	5.25419	0	0
Endocardial_cells	ENSMUSG00000026365	Cfh	55.2673	9.98201	2.46902	0	0
Endocardial_cells	ENSMUSG00000027962	Vcam1	5.73609	0.973262	2.55917	5.81e-237	1.77e-232
Endocardial_cells	ENSMUSG00000001029	Icam2	2.70182	0.709575	1.92891	1.5e-173	4.57e-169
Endocardial_cells	ENSMUSG00000020902	Ntn1	3.54191	0.900811	1.97523	1.15e-163	3.51e-159
Endocardial_cells	ENSMUSG00000039004	Bmp6	8.43749	2.23291	1.91789	3.03e-149	9.25e-145
Endocardial_cells	ENSMUSG00000039304	Tnfsf10	1.97404	0.518512	1.9287	2.77e-134	8.43e-130
Endocardial_cells	ENSMUSG00000001300	Efnb2	2.0219	0.65769	1.62023	1.49e-103	4.54e-99
Endocardial_cells	ENSMUSG00000067158	Col4a4	3.57306	1.09273	1.70923	5.32e-97	1.62e-92
Endocardial_cells	ENSMUSG00000026042	Col5a2	5.62271	2.65978	1.07996	5.21e-87	1.59e-82
Endocardial_cells	ENSMUSG00000027082	Tfpi	2.00732	0.623563	1.68666	1.03e-73	3.15e-69
Endocardial_cells	ENSMUSG00000079465	Col4a3	2.20292	0.565649	1.96144	2.59e-73	7.9e-69
Endocardial_cells	ENSMUSG00000031451	Gas6	4.00942	1.93959	1.04764	6.98e-69	2.13e-64
Endocardial_cells	ENSMUSG00000026728	Vim	7.71453	3.67123	1.07132	9.45e-68	2.88e-63
Endocardial_cells	ENSMUSG00000001870	Ltbp1	3.92312	1.60804	1.2867	1.1e-46	3.34e-42
Endocardial_cells	ENSMUSG00000037820	Tgm2	1.45745	0.69709	1.06403	1.44e-33	4.38e-29
Source(ligand)	Pair.Name	Ligand.ApprovedSymbol	Receptor.ApprovedSymbol	Target(receptor)	Gene ID	Gene Name	Target_Cluster_mean	Other_Cluster_mean	Log2FC	Pvalue	Qvalue
Endocardial_cells	NRG1_ERBB4	NRG1	ERBB4	Adipocytes	ENSMUSG00000062209	Erbb4	15.5066	1.81208	3.09716	2.18e-12	6.65e-08
Endocardial_cells	NRG1_ERBB4	NRG1	ERBB4	Cardiomyocytes	ENSMUSG00000062209	Erbb4	9.13353	0.519076	4.13716	0	0
Endocardial_cells	NRG1_ERBB3	NRG1	ERBB3	Schwann_cells	ENSMUSG00000018166	Erbb3	2.43069	0.0268128	6.5023	2.98e-62	9.08e-58
Endocardial_cells	AHSG_INSR	AHSG	INSR	Cardiomyocytes	ENSMUSG00000005534	Insr	3.69935	1.5095	1.2932	2.25e-89	6.87e-85
Endocardial_cells	CFH_SELL	CFH	SELL	B_cell	ENSMUSG00000026581	Sell	4.90081	0.0135923	8.49409	0	0
Endocardial_cells	VCAM1_ITGA4	VCAM1	ITGA4	B_cell	ENSMUSG00000027009	Itga4	6.82627	0.472087	3.85397	2.15e-43	6.55e-39
Endocardial_cells	VCAM1_ITGA4	VCAM1	ITGA4	Mono_Macro	ENSMUSG00000027009	Itga4	2.85524	0.160462	4.1533	0	0
Endocardial_cells	VCAM1_ITGA4	VCAM1	ITGA4	Schwann_cells	ENSMUSG00000027009	Itga4	2.19177	0.48894	2.16437	5.1e-10	1.56e-05
Endocardial_cells	VCAM1_ITGA4	VCAM1	ITGA4	T_cell	ENSMUSG00000027009	Itga4	11.5997	0.427538	4.76189	1.01e-79	3.08e-75
Endocardial_cells	VCAM1_ITGB7	VCAM1	ITGB7	T_cell	ENSMUSG00000001281	Itgb7	4.16174	0.0330286	6.97733	0	0
Endocardial_cells	VCAM1_ITGB2	VCAM1	ITGB2	T_cell	ENSMUSG00000000290	Itgb2	3.00613	0.155362	4.2742	1.44e-67	4.4e-63
Endocardial_cells	ICAM2_ITGB2	ICAM2	ITGB2	T_cell	ENSMUSG00000000290	Itgb2	3.00613	0.155362	4.2742	1.44e-67	4.4e-63
Endocardial_cells	ICAM2_ITGAL	ICAM2	ITGAL	T_cell	ENSMUSG00000030830	Itgal	3.21942	0.0319857	6.65323	4.34e-283	1.32e-278
Endocardial_cells	NTN1_NEO1	NTN1	NEO1	Cardiomyocytes	ENSMUSG00000032340	Neo1	2.04225	0.747117	1.45076	2.41e-121	7.35e-117
Endocardial_cells	NTN1_NEO1	NTN1	NEO1	Epicardial_cells	ENSMUSG00000032340	Neo1	5.56694	0.815368	2.77136	1.67e-139	5.08e-135
Endocardial_cells	BMP6_ACVR1	BMP6	ACVR1	Endocardial_cells	ENSMUSG00000026836	Acvr1	3.61098	0.843458	2.098	7.33e-168	2.23e-163
Endocardial_cells	BMP6_ACVR2A	BMP6	ACVR2A	Endothelial_cells	ENSMUSG00000052155	Acvr2a	2.09235	0.716143	1.5468	9.91e-89	3.02e-84
Endocardial_cells	BMP6_BMPR1A	BMP6	BMPR1A	Cardiomyocytes	ENSMUSG00000021796	Bmpr1a	3.1527	1.48337	1.08771	3.49e-61	1.06e-56
Endocardial_cells	BMP6_BMPR1A	BMP6	BMPR1A	Epicardial_cells	ENSMUSG00000021796	Bmpr1a	4.85073	1.64972	1.55598	5.09e-57	1.55e-52
Endocardial_cells	BMP6_BMPR1B	BMP6	BMPR1B	Epicardial_cells	ENSMUSG00000052430	Bmpr1b	2.02789	0.0202098	6.64878	0	0
Endocardial_cells	BMP6_BMPR2	BMP6	BMPR2	Endocardial_cells	ENSMUSG00000067336	Bmpr2	7.15342	2.44875	1.54659	1.45e-150	4.42e-146
Endocardial_cells	EFNB2_EPHA4	EFNB2	EPHA4	Endocardial_cells	ENSMUSG00000026235	Epha4	2.17131	0.882898	1.29825	5.98e-73	1.82e-68
Endocardial_cells	EFNB2_EPHB1	EFNB2	EPHB1	Epicardial_cells	ENSMUSG00000032537	Ephb1	2.15223	0.223084	3.27017	8.13e-160	2.48e-155
Endocardial_cells	EFNB2_EPHB2	EFNB2	EPHB2	Schwann_cells	ENSMUSG00000028664	Ephb2	4.10633	0.0217325	7.56185	8.27e-194	2.52e-189
Endocardial_cells	EFNB2_EPHB4	EFNB2	EPHB4	Endocardial_cells	ENSMUSG00000029710	Ephb4	2.35122	0.724522	1.69831	2.8e-124	8.52e-120
Endocardial_cells	EFNB2_EPHB4	EFNB2	EPHB4	Endothelial_cells	ENSMUSG00000029710	Ephb4	1.91389	0.518156	1.88505	4.18e-183	1.28e-178
Endocardial_cells	EFNB2_EPHB4	EFNB2	EPHB4	Lymphatic_ECs	ENSMUSG00000029710	Ephb4	2.13835	0.852658	1.32646	9.68e-14	2.95e-09
Endocardial_cells	EFNB2_GRM1	EFNB2	GRM1	Cardiomyocytes	ENSMUSG00000019828	Grm1	9.15652	0.12184	6.23175	0	0
Endocardial_cells	EFNB2_PECAM1	EFNB2	PECAM1	Endocardial_cells	ENSMUSG00000020717	Pecam1	17.6387	3.09155	2.51234	0	0
Endocardial_cells	EFNB2_PECAM1	EFNB2	PECAM1	Endothelial_cells	ENSMUSG00000020717	Pecam1	9.43941	2.67469	1.81933	0	0
Endocardial_cells	COL4A4_CD93	COL4A4	CD93	Endocardial_cells	ENSMUSG00000027435	Cd93	4.01516	1.03284	1.95885	1.07e-191	3.27e-187
Endocardial_cells	COL4A4_CD93	COL4A4	CD93	Endothelial_cells	ENSMUSG00000027435	Cd93	2.93463	0.747351	1.97332	5.03e-305	1.53e-300
Endocardial_cells	COL5A2_DDR1	COL5A2	DDR1	Epicardial_cells	ENSMUSG00000003534	Ddr1	2.0666	0.172616	3.58162	6.79e-175	2.07e-170
Endocardial_cells	TFPI_LRP1	TFPI	LRP1	Fibroblasts	ENSMUSG00000040249	Lrp1	10.3294	1.4082	2.87483	0	0
Endocardial_cells	TFPI_VLDLR	TFPI	VLDLR	Cardiomyocytes	ENSMUSG00000024924	Vldlr	3.54389	0.494947	2.83999	0	0
Endocardial_cells	COL4A3_ITGAV	COL4A3	ITGAV	Schwann_cells	ENSMUSG00000027087	Itgav	7.86558	1.03024	2.93258	6.06e-08	0.00184664
Endocardial_cells	COL4A3_CD93	COL4A3	CD93	Endocardial_cells	ENSMUSG00000027435	Cd93	4.01516	1.03284	1.95885	1.07e-191	3.27e-187
Endocardial_cells	COL4A3_CD93	COL4A3	CD93	Endothelial_cells	ENSMUSG00000027435	Cd93	2.93463	0.747351	1.97332	5.03e-305	1.53e-300
Endocardial_cells	COL4A3_CD47	COL4A3	CD47	T_cell	ENSMUSG00000055447	Cd47	6.09378	2.88264	1.07995	1.81e-08	0.00055318
Endocardial_cells	GAS6_AXL	GAS6	AXL	Fibroblasts	ENSMUSG00000002602	Axl	4.08695	0.558985	2.87014	0	0
Endocardial_cells	GAS6_MERTK	GAS6	MERTK	Mono_Macro	ENSMUSG00000014361	Mertk	4.03327	0.788746	2.35432	5.77e-257	1.76e-252
Endocardial_cells	GAS6_MERTK	GAS6	MERTK	Smooth_moscle_cells	ENSMUSG00000014361	Mertk	2.86649	1.17382	1.28808	3.59e-09	0.000109436
Endocardial_cells	VIM_CD44	VIM	CD44	Mono_Macro	ENSMUSG00000005087	Cd44	2.08922	0.205124	3.34839	2.39e-250	7.27e-246
Endocardial_cells	VIM_CD44	VIM	CD44	T_cell	ENSMUSG00000005087	Cd44	4.48275	0.413608	3.43805	5.41e-32	1.65e-27
Endocardial_cells	LTBP1_ITGB5	LTBP1	ITGB5	Fibroblasts	ENSMUSG00000022817	Itgb5	2.45619	0.930096	1.40097	4.4e-189	1.34e-184
Endocardial_cells	TGM2_SDC4	TGM2	SDC4	Epicardial_cells	ENSMUSG00000017009	Sdc4	1.68836	0.252868	2.73916	1.2e-75	3.67e-71
Endocardial_cells	TGM2_SDC4	TGM2	SDC4	Schwann_cells	ENSMUSG00000017009	Sdc4	2.0625	0.287659	2.84196	6.25e-08	0.00190526

## Sheet: Sheet5
Target_Cluster	Gene ID	Gene Name	Target_Cluster_mean	Other_Cluster_mean	Log2FC	Pvalue	Qvalue
Endothelial_cells	ENSMUSG00000000489	Pdgfb	2.89743	0.194163	3.89943	0	0
Endothelial_cells	ENSMUSG00000032006	Pdgfd	14.9405	1.33424	3.48515	0	0
Endothelial_cells	ENSMUSG00000061353	Cxcl12	6.60234	0.707089	3.22301	0	0
Endothelial_cells	ENSMUSG00000025608	Podxl	4.61338	0.503949	3.19448	0	0
Endothelial_cells	ENSMUSG00000019647	Sema6a	7.63743	1.26952	2.58881	0	0
Endothelial_cells	ENSMUSG00000001029	Icam2	2.17526	0.45382	2.26099	2.18e-262	6.63e-258
Endothelial_cells	ENSMUSG00000060802	B2m	10.9927	5.19431	1.08155	3.24e-229	9.88e-225
Endothelial_cells	ENSMUSG00000039004	Bmp6	5.83298	1.75775	1.7305	4.44e-214	1.35e-209
Endothelial_cells	ENSMUSG00000031503	Col4a2	7.44167	3.06122	1.28152	4.13e-193	1.26e-188
Endothelial_cells	ENSMUSG00000001300	Efnb2	1.98489	0.374769	2.40499	1.37e-189	4.18e-185
Endothelial_cells	ENSMUSG00000039304	Tnfsf10	1.5342	0.350025	2.13196	9.16e-185	2.79e-180
Endothelial_cells	ENSMUSG00000020044	Timp3	6.12465	2.85036	1.10348	7.09e-177	2.16e-172
Endothelial_cells	ENSMUSG00000028763	Hspg2	5.99064	2.76651	1.11464	1.58e-175	4.83e-171
Endothelial_cells	ENSMUSG00000028041	Adam15	1.52366	0.504119	1.59571	2.13e-107	6.51e-103
Endothelial_cells	ENSMUSG00000032562	Gnai2	2.69614	1.3187	1.03178	7.5e-85	2.29e-80
Source(ligand)	Pair.Name	Ligand.ApprovedSymbol	Receptor.ApprovedSymbol	Target(receptor)	Gene ID	Gene Name	Target_Cluster_mean	Other_Cluster_mean	Log2FC	Pvalue	Qvalue
Endothelial_cells	PDGFB_LRP1	PDGFB	LRP1	Fibroblasts	ENSMUSG00000040249	Lrp1	10.3294	1.4082	2.87483	0	0
Endothelial_cells	PDGFB_PDGFRB	PDGFB	PDGFRB	pericytes	ENSMUSG00000024620	Pdgfrb	21.142	0.708332	4.89954	0	0
Endothelial_cells	PDGFB_PDGFRB	PDGFB	PDGFRB	Smooth_moscle_cells	ENSMUSG00000024620	Pdgfrb	5.97544	2.11986	1.49507	1.86e-22	5.68e-18
Endothelial_cells	PDGFB_PDGFRA	PDGFB	PDGFRA	Fibroblasts	ENSMUSG00000029231	Pdgfra	8.43711	0.33274	4.66428	0	0
Endothelial_cells	PDGFB_ART1	PDGFB	ART1	Cardiomyocytes	ENSMUSG00000030996	Art1	2.39625	0.171763	3.80229	0	0
Endothelial_cells	PDGFD_PDGFRB	PDGFD	PDGFRB	pericytes	ENSMUSG00000024620	Pdgfrb	21.142	0.708332	4.89954	0	0
Endothelial_cells	PDGFD_PDGFRB	PDGFD	PDGFRB	Smooth_moscle_cells	ENSMUSG00000024620	Pdgfrb	5.97544	2.11986	1.49507	1.86e-22	5.68e-18
Endothelial_cells	CXCL12_ACKR3	CXCL12	ACKR3	Fibroblasts	ENSMUSG00000044337	Ackr3	2.8496	0.892658	1.67458	1.69e-140	5.15e-136
Endothelial_cells	PODXL_SELL	PODXL	SELL	B_cell	ENSMUSG00000026581	Sell	4.90081	0.0135923	8.49409	0	0
Endothelial_cells	SEMA6A_PLXNA2	SEMA6A	PLXNA2	Endothelial_cells	ENSMUSG00000026640	Plxna2	4.60201	1.05101	2.13049	6.17e-304	1.88e-299
Endothelial_cells	SEMA6A_PLXNA4	SEMA6A	PLXNA4	Endocardial_cells	ENSMUSG00000029765	Plxna4	6.07497	2.83148	1.10132	2.59e-137	7.9e-133
Endothelial_cells	SEMA6A_PLXNA4	SEMA6A	PLXNA4	Epicardial_cells	ENSMUSG00000029765	Plxna4	35.1602	2.23262	3.97713	1.67e-212	5.1e-208
Endothelial_cells	ICAM2_ITGB2	ICAM2	ITGB2	T_cell	ENSMUSG00000000290	Itgb2	3.00613	0.155362	4.2742	1.44e-67	4.4e-63
Endothelial_cells	ICAM2_ITGAL	ICAM2	ITGAL	T_cell	ENSMUSG00000030830	Itgal	3.21942	0.0319857	6.65323	4.34e-283	1.32e-278
Endothelial_cells	BMP6_ACVR1	BMP6	ACVR1	Endocardial_cells	ENSMUSG00000026836	Acvr1	3.61098	0.843458	2.098	7.33e-168	2.23e-163
Endothelial_cells	BMP6_ACVR2A	BMP6	ACVR2A	Endothelial_cells	ENSMUSG00000052155	Acvr2a	2.09235	0.716143	1.5468	9.91e-89	3.02e-84
Endothelial_cells	BMP6_BMPR1A	BMP6	BMPR1A	Cardiomyocytes	ENSMUSG00000021796	Bmpr1a	3.1527	1.48337	1.08771	3.49e-61	1.06e-56
Endothelial_cells	BMP6_BMPR1A	BMP6	BMPR1A	Epicardial_cells	ENSMUSG00000021796	Bmpr1a	4.85073	1.64972	1.55598	5.09e-57	1.55e-52
Endothelial_cells	BMP6_BMPR1B	BMP6	BMPR1B	Epicardial_cells	ENSMUSG00000052430	Bmpr1b	2.02789	0.0202098	6.64878	0	0
Endothelial_cells	BMP6_BMPR2	BMP6	BMPR2	Endocardial_cells	ENSMUSG00000067336	Bmpr2	7.15342	2.44875	1.54659	1.45e-150	4.42e-146
Endothelial_cells	COL4A2_CD93	COL4A2	CD93	Endocardial_cells	ENSMUSG00000027435	Cd93	4.01516	1.03284	1.95885	1.07e-191	3.27e-187
Endothelial_cells	COL4A2_CD93	COL4A2	CD93	Endothelial_cells	ENSMUSG00000027435	Cd93	2.93463	0.747351	1.97332	5.03e-305	1.53e-300
Endothelial_cells	EFNB2_EPHA4	EFNB2	EPHA4	Endocardial_cells	ENSMUSG00000026235	Epha4	2.17131	0.882898	1.29825	5.98e-73	1.82e-68
Endothelial_cells	EFNB2_EPHB1	EFNB2	EPHB1	Epicardial_cells	ENSMUSG00000032537	Ephb1	2.15223	0.223084	3.27017	8.13e-160	2.48e-155
Endothelial_cells	EFNB2_EPHB2	EFNB2	EPHB2	Schwann_cells	ENSMUSG00000028664	Ephb2	4.10633	0.0217325	7.56185	8.27e-194	2.52e-189
Endothelial_cells	EFNB2_EPHB4	EFNB2	EPHB4	Endocardial_cells	ENSMUSG00000029710	Ephb4	2.35122	0.724522	1.69831	2.8e-124	8.52e-120
Endothelial_cells	EFNB2_EPHB4	EFNB2	EPHB4	Endothelial_cells	ENSMUSG00000029710	Ephb4	1.91389	0.518156	1.88505	4.18e-183	1.28e-178
Endothelial_cells	EFNB2_EPHB4	EFNB2	EPHB4	Lymphatic_ECs	ENSMUSG00000029710	Ephb4	2.13835	0.852658	1.32646	9.68e-14	2.95e-09
Endothelial_cells	EFNB2_GRM1	EFNB2	GRM1	Cardiomyocytes	ENSMUSG00000019828	Grm1	9.15652	0.12184	6.23175	0	0
Endothelial_cells	EFNB2_PECAM1	EFNB2	PECAM1	Endocardial_cells	ENSMUSG00000020717	Pecam1	17.6387	3.09155	2.51234	0	0
Endothelial_cells	EFNB2_PECAM1	EFNB2	PECAM1	Endothelial_cells	ENSMUSG00000020717	Pecam1	9.43941	2.67469	1.81933	0	0
Endothelial_cells	TIMP3_KDR	TIMP3	KDR	Endothelial_cells	ENSMUSG00000062960	Kdr	9.58148	0.764645	3.64739	0	0
Endothelial_cells	TIMP3_KDR	TIMP3	KDR	Lymphatic_ECs	ENSMUSG00000062960	Kdr	5.99933	2.93385	1.03201	1.23e-27	3.74e-23
Endothelial_cells	HSPG2_ITGA2	HSPG2	ITGA2	T_cell	ENSMUSG00000015533	Itga2	2.28297	0.0584312	5.28803	2.52e-60	7.68e-56
Endothelial_cells	ADAM15_ITGA9	ADAM15	ITGA9	Endocardial_cells	ENSMUSG00000039115	Itga9	3.12875	1.19805	1.38489	8.39e-76	2.56e-71
Endothelial_cells	ADAM15_ITGA9	ADAM15	ITGA9	Lymphatic_ECs	ENSMUSG00000039115	Itga9	7.63646	1.29667	2.55809	2.1e-56	6.41e-52
Endothelial_cells	ADAM15_ITGA9	ADAM15	ITGA9	Mono_Macro	ENSMUSG00000039115	Itga9	2.58351	1.19615	1.11094	4.81e-46	1.47e-41
Endothelial_cells	ADAM15_ITGAV	ADAM15	ITGAV	Schwann_cells	ENSMUSG00000027087	Itgav	7.86558	1.03024	2.93258	6.06e-08	0.00184664
Endothelial_cells	GNAI2_EGFR	GNAI2	EGFR	Fibroblasts	ENSMUSG00000020122	Egfr	6.40047	0.554532	3.52884	0	0
Endothelial_cells	GNAI2_CAV1	GNAI2	CAV1	Endothelial_cells	ENSMUSG00000007655	Cav1	12.5637	1.16595	3.42969	0	0
Endothelial_cells	GNAI2_C5AR1	GNAI2	C5AR1	Mono_Macro	ENSMUSG00000049130	C5ar1	2.42309	0.0292162	6.37394	0	0
Endothelial_cells	GNAI2_TSHR	GNAI2	TSHR	Adipocytes	ENSMUSG00000020963	Tshr	6.36651	0.00430384	10.5307	1.23e-231	3.74e-227
Endothelial_cells	GNAI2_CCR5	GNAI2	CCR5	Mono_Macro	ENSMUSG00000079227	Ccr5	2.72888	0.0305257	6.48214	0	0
Endothelial_cells	GNAI2_EDNRA	GNAI2	EDNRA	Cardiomyocytes	ENSMUSG00000031616	Ednra	1.3502	0.538075	1.32729	1.86e-117	5.66e-113
Endothelial_cells	GNAI2_EDNRA	GNAI2	EDNRA	pericytes	ENSMUSG00000031616	Ednra	4.78101	0.347217	3.78341	0	0
Endothelial_cells	GNAI2_EDNRA	GNAI2	EDNRA	Smooth_moscle_cells	ENSMUSG00000031616	Ednra	2.97015	0.640543	2.21317	1.08e-16	3.3e-12
Endothelial_cells	GNAI2_F2R	GNAI2	F2R	Endocardial_cells	ENSMUSG00000048376	F2r	2.38519	0.391118	2.60842	1.71e-207	5.21e-203
Endothelial_cells	GNAI2_F2R	GNAI2	F2R	T_cell	ENSMUSG00000048376	F2r	1.6267	0.559492	1.53976	2.64e-07	0.00805534
Endothelial_cells	GNAI2_OPRM1	GNAI2	OPRM1	T_cell	ENSMUSG00000000766	Oprm1	4.1458	0.0847771	5.61183	1.6e-141	4.86e-137
Endothelial_cells	GNAI2_P2RY12	GNAI2	P2RY12	Mono_Macro	ENSMUSG00000036353	P2ry12	1.70167	0.0863876	4.29998	0	0

## Sheet: Sheet6
Target_Cluster	Gene ID	Gene Name	Target_Cluster_mean	Other_Cluster_mean	Log2FC	Pvalue	Qvalue
Epicardial_cells	ENSMUSG00000020467	Efemp1	15.7856	0.738371	4.41812	0	0
Epicardial_cells	ENSMUSG00000028871	Rspo1	3.37767	0.0534589	5.98146	0	0
Epicardial_cells	ENSMUSG00000055653	Gpc3	12.3231	0.288892	5.41469	0	0
Epicardial_cells	ENSMUSG00000040254	Sema3d	9.81585	0.251794	5.2848	0	0
Epicardial_cells	ENSMUSG00000028780	Sema3c	9.24848	0.423213	4.44976	0	0
Epicardial_cells	ENSMUSG00000048915	Efna5	18.4146	1.20495	3.9338	2.34e-254	7.14e-250
Epicardial_cells	ENSMUSG00000056427	Slit3	29.3331	2.67581	3.45448	1.11e-189	3.38e-185
Epicardial_cells	ENSMUSG00000009281	Rarres2	18.4059	1.40257	3.71402	3.57e-189	1.09e-184
Epicardial_cells	ENSMUSG00000024164	C3	33.072	3.89712	3.08513	1.44e-164	4.39e-160
Epicardial_cells	ENSMUSG00000001741	Il16	3.21288	0.38708	3.05316	1.31e-148	4e-144
Epicardial_cells	ENSMUSG00000060275	Nrg2	2.14399	0.196142	3.45033	4.65e-120	1.42e-115
Epicardial_cells	ENSMUSG00000031273	Col4a6	1.9613	0.25109	2.96554	6.53e-114	1.99e-109
Epicardial_cells	ENSMUSG00000026043	Col3a1	21.0324	6.7364	1.64257	4.85e-88	1.48e-83
Epicardial_cells	ENSMUSG00000039405	Prss23	2.21448	0.410232	2.43246	2.39e-83	7.28e-79
Epicardial_cells	ENSMUSG00000073418	C4b	4.30918	0.594785	2.85697	1.31e-75	3.99e-71
Epicardial_cells	ENSMUSG00000006369	Fbln1	4.71939	1.73373	1.44472	3.64e-62	1.11e-57
Epicardial_cells	ENSMUSG00000017466	Timp2	9.90121	3.31013	1.58072	5.06e-56	1.54e-51
Epicardial_cells	ENSMUSG00000014599	Csf1	2.97104	0.813443	1.86886	2.45e-47	7.46e-43
Epicardial_cells	ENSMUSG00000022231	Sema5a	2.75747	0.70755	1.96244	7.97e-46	2.43e-41
Epicardial_cells	ENSMUSG00000031274	Col4a5	2.87008	1.04191	1.46186	2.27e-45	6.91e-41
Epicardial_cells	ENSMUSG00000022371	Col14a1	2.40232	0.696908	1.78539	1.27e-37	3.87e-33
Epicardial_cells	ENSMUSG00000037820	Tgm2	2.41191	0.718249	1.74762	3.13e-37	9.54e-33
Epicardial_cells	ENSMUSG00000079465	Col4a3	2.06606	0.671603	1.6212	7.9e-37	2.41e-32
Epicardial_cells	ENSMUSG00000067158	Col4a4	3.01511	1.2629	1.25547	1.9e-36	5.81e-32
Epicardial_cells	ENSMUSG00000024659	Anxa1	1.88618	0.653785	1.52858	3.14e-27	9.56e-23
Epicardial_cells	ENSMUSG00000031451	Gas6	4.55545	2.05373	1.14935	8.07e-24	2.46e-19
Source(ligand)	Pair.Name	Ligand.ApprovedSymbol	Receptor.ApprovedSymbol	Target(receptor)	Gene ID	Gene Name	Target_Cluster_mean	Other_Cluster_mean	Log2FC	Pvalue	Qvalue
Epicardial_cells	EFEMP1_EGFR	EFEMP1	EGFR	Fibroblasts	ENSMUSG00000020122	Egfr	6.40047	0.554532	3.52884	0	0
Epicardial_cells	RSPO1_LRP6	RSPO1	LRP6	Mono_Macro	ENSMUSG00000030201	Lrp6	3.33748	1.39851	1.25487	1.29e-69	3.94e-65
Epicardial_cells	RSPO1_LGR4	RSPO1	LGR4	Schwann_cells	ENSMUSG00000050199	Lgr4	2.51185	0.358787	2.80755	7.3e-10	2.23e-05
Epicardial_cells	RSPO1_ZNRF3	RSPO1	ZNRF3	T_cell	ENSMUSG00000041961	Znrf3	3.36769	0.4765	2.82121	8.99e-20	2.74e-15
Epicardial_cells	SEMA3D_NRP1	SEMA3D	NRP1	Endothelial_cells	ENSMUSG00000025810	Nrp1	14.1382	5.24135	1.43159	0	0
Epicardial_cells	SEMA3C_NRP1	SEMA3C	NRP1	Endothelial_cells	ENSMUSG00000025810	Nrp1	14.1382	5.24135	1.43159	0	0
Epicardial_cells	SEMA3C_NRP2	SEMA3C	NRP2	Endothelial_cells	ENSMUSG00000025969	Nrp2	5.89271	1.12525	2.38869	0	0
Epicardial_cells	SEMA3C_NRP2	SEMA3C	NRP2	Lymphatic_ECs	ENSMUSG00000025969	Nrp2	12.8226	2.1986	2.54403	2.28e-53	6.96e-49
Epicardial_cells	SEMA3C_PLXND1	SEMA3C	PLXND1	Endocardial_cells	ENSMUSG00000030123	Plxnd1	1.66586	0.79898	1.06004	2.81e-50	8.56e-46
Epicardial_cells	SEMA3C_PLXND1	SEMA3C	PLXND1	Endothelial_cells	ENSMUSG00000030123	Plxnd1	1.97196	0.50939	1.95279	2.54e-176	7.75e-172
Epicardial_cells	EFNA5_EPHA4	EFNA5	EPHA4	Endocardial_cells	ENSMUSG00000026235	Epha4	2.17131	0.882898	1.29825	5.98e-73	1.82e-68
Epicardial_cells	EFNA5_EPHA7	EFNA5	EPHA7	Endocardial_cells	ENSMUSG00000028289	Epha7	5.50948	0.232594	4.56603	5.66e-268	1.72e-263
Epicardial_cells	EFNA5_EPHB1	EFNA5	EPHB1	Epicardial_cells	ENSMUSG00000032537	Ephb1	2.15223	0.223084	3.27017	8.13e-160	2.48e-155
Epicardial_cells	EFNA5_EPHB2	EFNA5	EPHB2	Schwann_cells	ENSMUSG00000028664	Ephb2	4.10633	0.0217325	7.56185	8.27e-194	2.52e-189
Epicardial_cells	C3_LRP1	C3	LRP1	Fibroblasts	ENSMUSG00000040249	Lrp1	10.3294	1.4082	2.87483	0	0
Epicardial_cells	C3_C3AR1	C3	C3AR1	Mono_Macro	ENSMUSG00000040552	C3ar1	2.15954	0.0458236	5.55849	0	0
Epicardial_cells	C3_ITGB2	C3	ITGB2	T_cell	ENSMUSG00000000290	Itgb2	3.00613	0.155362	4.2742	1.44e-67	4.4e-63
Epicardial_cells	IL16_KCND2	IL16	KCND2	Cardiomyocytes	ENSMUSG00000060882	Kcnd2	11.1537	1.06281	3.39157	0	0
Epicardial_cells	IL16_KCND2	IL16	KCND2	Epicardial_cells	ENSMUSG00000060882	Kcnd2	28.0273	1.8863	3.8932	0	0
Epicardial_cells	NRG2_ERBB4	NRG2	ERBB4	Adipocytes	ENSMUSG00000062209	Erbb4	15.5066	1.81208	3.09716	2.18e-12	6.65e-08
Epicardial_cells	NRG2_ERBB4	NRG2	ERBB4	Cardiomyocytes	ENSMUSG00000062209	Erbb4	9.13353	0.519076	4.13716	0	0
Epicardial_cells	COL4A6_CD93	COL4A6	CD93	Schwann_cells	ENSMUSG00000018166	Erbb3	2.43069	0.0268128	6.5023	2.98e-62	9.08e-58
Epicardial_cells	COL4A6_CD93	COL4A6	CD93	Endocardial_cells	ENSMUSG00000027435	Cd93	4.01516	1.03284	1.95885	1.07e-191	3.27e-187
Epicardial_cells	COL4A6_CD93	COL4A6	CD93	Endothelial_cells	ENSMUSG00000027435	Cd93	2.93463	0.747351	1.97332	5.03e-305	1.53e-300
Epicardial_cells	COL3A1_DDR1	COL3A1	DDR1	Epicardial_cells	ENSMUSG00000003534	Ddr1	2.0666	0.172616	3.58162	6.79e-175	2.07e-170
Epicardial_cells	COL3A1_DDR2	COL3A1	DDR2	Fibroblasts	ENSMUSG00000026674	Ddr2	3.22144	0.355875	3.17826	0	0
Epicardial_cells	CSF1_CSF1R	CSF1	CSF1R	Mono_Macro	ENSMUSG00000024621	Csf1r	8.44453	0.159412	5.72719	0	0
Epicardial_cells	SEMA5A_MET	SEMA5A	MET	Adipocytes	ENSMUSG00000009376	Met	0.752675	0.08647	3.12175	1.01e-08	0.00030712
Epicardial_cells	SEMA5A_MET	SEMA5A	MET	Epicardial_cells	ENSMUSG00000009376	Met	1.51766	0.0474566	4.9991	0	0
Epicardial_cells	COL4A5_CD93	COL4A5	CD93	Endocardial_cells	ENSMUSG00000027435	Cd93	4.01516	1.03284	1.95885	1.07e-191	3.27e-187
Epicardial_cells	COL14A1_CD44	COL14A1	CD44	Mono_Macro	ENSMUSG00000005087	Cd44	2.08922	0.205124	3.34839	2.39e-250	7.27e-246
Epicardial_cells	COL14A1_CD44	COL14A1	CD44	T_cell	ENSMUSG00000005087	Cd44	4.48275	0.413608	3.43805	5.41e-32	1.65e-27
Epicardial_cells	TGM2_SDC4	TGM2	SDC4	Epicardial_cells	ENSMUSG00000017009	Sdc4	1.68836	0.252868	2.73916	1.2e-75	3.67e-71
Epicardial_cells	TGM2_SDC4	TGM2	SDC4	Schwann_cells	ENSMUSG00000017009	Sdc4	2.0625	0.287659	2.84196	6.25e-08	0.00190526
Epicardial_cells	COL4A3_ITGAV	COL4A3	ITGAV	Schwann_cells	ENSMUSG00000027087	Itgav	7.86558	1.03024	2.93258	6.06e-08	0.00184664
Epicardial_cells	COL4A3_CD93	COL4A3	CD93	Endocardial_cells	ENSMUSG00000027435	Cd93	4.01516	1.03284	1.95885	1.07e-191	3.27e-187
Epicardial_cells	COL4A3_CD47	COL4A3	CD47	T_cell	ENSMUSG00000055447	Cd47	6.09378	2.88264	1.07995	1.81e-08	0.00055318
Epicardial_cells	COL4A4_CD93	COL4A4	CD93	Endocardial_cells	ENSMUSG00000027435	Cd93	4.01516	1.03284	1.95885	1.07e-191	3.27e-187
Epicardial_cells	COL4A4_CD93	COL4A4	CD93	Endothelial_cells	ENSMUSG00000027435	Cd93	2.93463	0.747351	1.97332	5.03e-305	1.53e-300
Epicardial_cells	ANXA1_EGFR	ANXA1	EGFR	Fibroblasts	ENSMUSG00000020122	Egfr	6.40047	0.554532	3.52884	0	0
Epicardial_cells	ANXA1_DYSF	ANXA1	DYSF	Endothelial_cells	ENSMUSG00000033788	Dysf	6.70207	0.936473	2.8393	0	0
Epicardial_cells	GAS6_AXL	GAS6	AXL	Fibroblasts	ENSMUSG00000002602	Axl	4.08695	0.558985	2.87014	0	0
Epicardial_cells	GAS6_MERTK	GAS6	MERTK	Mono_Macro	ENSMUSG00000014361	Mertk	4.03327	0.788746	2.35432	5.77e-257	1.76e-252
Epicardial_cells	GAS6_MERTK	GAS6	MERTK	Smooth_moscle_cells	ENSMUSG00000014361	Mertk	2.86649	1.17382	1.28808	3.59e-09	0.000109436

## Sheet: Sheet7
Target_Cluster	Gene ID	Gene Name	Target_Cluster_mean	Other_Cluster_mean	Log2FC	Pvalue	Qvalue
Fibroblasts	ENSMUSG00000021614	Vcan	3.0461	0.169118	4.17086	0	0
Fibroblasts	ENSMUSG00000031740	Mmp2	6.12291	0.347581	4.1388	0	0
Fibroblasts	ENSMUSG00000001506	Col1a1	7.07245	0.415515	4.08924	0	0
Fibroblasts	ENSMUSG00000030116	Mfap5	6.15164	0.379691	4.01807	0	0
Fibroblasts	ENSMUSG00000023885	Thbs2	3.05217	0.192951	3.98352	0	0
Fibroblasts	ENSMUSG00000019929	Dcn	85.1611	5.42273	3.9731	0	0
Fibroblasts	ENSMUSG00000031548	Sfrp1	2.66125	0.17172	3.95397	0	0
Fibroblasts	ENSMUSG00000068196	Col8a1	6.92047	0.503527	3.78073	0	0
Fibroblasts	ENSMUSG00000026837	Col5a1	4.29384	0.315782	3.76527	0	0
Fibroblasts	ENSMUSG00000023224	Serping1	13.8686	1.07739	3.68621	0	0
Fibroblasts	ENSMUSG00000031558	Slit2	3.22091	0.263939	3.60919	0	0
Fibroblasts	ENSMUSG00000029661	Col1a2	10.57	0.878876	3.58818	0	0
Fibroblasts	ENSMUSG00000006369	Fbln1	5.63714	0.475586	3.56719	0	0
Fibroblasts	ENSMUSG00000020681	Ace	1.70985	0.151946	3.49224	0	0
Fibroblasts	ENSMUSG00000059327	Eda	7.68592	0.795528	3.27223	0	0
Fibroblasts	ENSMUSG00000026043	Col3a1	21.0586	2.24101	3.23218	0	0
Fibroblasts	ENSMUSG00000064080	Fbln2	9.85848	1.05339	3.22633	0	0
Fibroblasts	ENSMUSG00000002900	Lamb1	7.17323	0.905124	2.98644	0	0
Fibroblasts	ENSMUSG00000019899	Lama2	26.0804	3.46481	2.91212	0	0
Fibroblasts	ENSMUSG00000026249	Serpine2	2.78516	0.385627	2.85249	0	0
Fibroblasts	ENSMUSG00000024164	C3	12.793	1.83951	2.79796	0	0
Fibroblasts	ENSMUSG00000026399	Cd55	2.52974	0.365147	2.79244	0	0
Fibroblasts	ENSMUSG00000027859	Ngf	3.33134	0.507161	2.71558	0	0
Fibroblasts	ENSMUSG00000005397	Nid1	9.91717	1.56373	2.66494	0	0
Fibroblasts	ENSMUSG00000031375	Bgn	11.0125	2.0383	2.4337	0	0
Fibroblasts	ENSMUSG00000027204	Fbn1	9.07923	1.72343	2.39729	0	0
Fibroblasts	ENSMUSG00000004098	Col5a3	3.06136	0.582703	2.39334	0	0
Fibroblasts	ENSMUSG00000026042	Col5a2	7.20244	1.42001	2.34258	0	0
Fibroblasts	ENSMUSG00000016494	Cd34	7.22552	1.59924	2.17571	0	0
Fibroblasts	ENSMUSG00000067158	Col4a4	2.93254	0.741936	1.98278	0	0
Fibroblasts	ENSMUSG00000017493	Igfbp4	4.61339	1.17242	1.97634	0	0
Fibroblasts	ENSMUSG00000017466	Timp2	7.45367	2.09843	1.82864	0	0
Fibroblasts	ENSMUSG00000056427	Slit3	6.78622	2.20201	1.62379	0	0
Fibroblasts	ENSMUSG00000003617	Cp	6.4649	2.21819	1.54324	0	0
Fibroblasts	ENSMUSG00000009281	Rarres2	3.37447	1.32784	1.34558	0	0
Fibroblasts	ENSMUSG00000022309	Angpt1	3.54169	1.07641	1.71821	3.18e-298	9.68e-294
Fibroblasts	ENSMUSG00000022371	Col14a1	2.0139	0.297682	2.75815	1.3e-285	3.96e-281
Fibroblasts	ENSMUSG00000020467	Efemp1	2.26901	0.74728	1.60234	7.47e-268	2.28e-263
Fibroblasts	ENSMUSG00000001870	Ltbp1	3.44487	1.23876	1.47556	4.68e-242	1.43e-237
Fibroblasts	ENSMUSG00000070509	Rgma	1.26131	0.222476	2.5032	5.65e-241	1.72e-236
Fibroblasts	ENSMUSG00000031274	Col4a5	2.41348	0.628028	1.94221	2.85e-227	8.68e-223
Fibroblasts	ENSMUSG00000020053	Igf1	2.71171	0.808696	1.74554	1.81e-215	5.53e-211
Fibroblasts	ENSMUSG00000024659	Anxa1	1.41373	0.432407	1.70904	1.2e-158	3.67e-154
Fibroblasts	ENSMUSG00000003814	Calr	3.87987	1.73758	1.15893	1.42e-137	4.33e-133
Fibroblasts	ENSMUSG00000031555	Adam9	1.601	0.718671	1.15557	2.99e-111	9.11e-107
Fibroblasts	ENSMUSG00000014599	Csf1	1.40643	0.68399	1.03999	4.08e-90	1.24e-85
Source(ligand)	Pair.Name	Ligand.ApprovedSymbol	Receptor.ApprovedSymbol	Target(receptor)	Gene ID	Gene Name	Target_Cluster_mean	Other_Cluster_mean	Log2FC	Pvalue	Qvalue
Fibroblasts	VCAN_ITGA4	VCAN	ITGA4	B_cell	ENSMUSG00000027009	Itga4	6.82627	0.472087	3.85397	2.15e-43	6.55e-39
Fibroblasts	VCAN_ITGA4	VCAN	ITGA4	Mono_Macro	ENSMUSG00000027009	Itga4	2.85524	0.160462	4.1533	0	0
Fibroblasts	VCAN_ITGA4	VCAN	ITGA4	Schwann_cells	ENSMUSG00000027009	Itga4	2.19177	0.48894	2.16437	5.1e-10	1.56e-05
Fibroblasts	VCAN_ITGA4	VCAN	ITGA4	T_cell	ENSMUSG00000027009	Itga4	11.5997	0.427538	4.76189	1.01e-79	3.08e-75
Fibroblasts	VCAN_EGFR	VCAN	EGFR	Fibroblasts	ENSMUSG00000020122	Egfr	6.40047	0.554532	3.52884	0	0
Fibroblasts	VCAN_CD44	VCAN	CD44	Mono_Macro	ENSMUSG00000005087	Cd44	2.08922	0.205124	3.34839	2.39e-250	7.27e-246
Fibroblasts	VCAN_CD44	VCAN	CD44	T_cell	ENSMUSG00000005087	Cd44	4.48275	0.413608	3.43805	5.41e-32	1.65e-27
Fibroblasts	MMP2_SDC2	MMP2	SDC2	Fibroblasts	ENSMUSG00000022261	Sdc2	6.66596	0.732648	3.18562	0	0
Fibroblasts	COL1A1_CD93	COL1A1	CD93	Endocardial_cells	ENSMUSG00000027435	Cd93	4.01516	1.03284	1.95885	1.07e-191	3.27e-187
Fibroblasts	COL1A1_CD93	COL1A1	CD93	Endothelial_cells	ENSMUSG00000027435	Cd93	2.93463	0.747351	1.97332	5.03e-305	1.53e-300
Fibroblasts	COL1A1_ITGA2	COL1A1	ITGA2	T_cell	ENSMUSG00000015533	Itga2	2.28297	0.0584312	5.28803	2.52e-60	7.68e-56
Fibroblasts	COL1A1_DDR1	COL1A1	DDR1	Epicardial_cells	ENSMUSG00000003534	Ddr1	2.0666	0.172616	3.58162	6.79e-175	2.07e-170
Fibroblasts	COL1A1_CD44	COL1A1	CD44	Mono_Macro	ENSMUSG00000005087	Cd44	2.08922	0.205124	3.34839	2.39e-250	7.27e-246
Fibroblasts	COL1A1_CD44	COL1A1	CD44	T_cell	ENSMUSG00000005087	Cd44	4.48275	0.413608	3.43805	5.41e-32	1.65e-27
Fibroblasts	COL1A1_CD36	COL1A1	CD36	Endothelial_cells	ENSMUSG00000002944	Cd36	60.1187	8.28232	2.85971	0	0
Fibroblasts	COL1A1_DDR2	COL1A1	DDR2	Fibroblasts	ENSMUSG00000026674	Ddr2	3.22144	0.355875	3.17826	0	0
Fibroblasts	MFAP5_NOTCH1	MFAP5	NOTCH1	Endocardial_cells	ENSMUSG00000026923	Notch1	3.41393	0.845475	2.0136	5.77e-193	1.76e-188
Fibroblasts	MFAP5_NOTCH1	MFAP5	NOTCH1	Lymphatic_ECs	ENSMUSG00000026923	Notch1	2.77945	1.05114	1.40284	7.77e-20	2.37e-15
Fibroblasts	THBS2_ITGA4	THBS2	ITGA4	B_cell	ENSMUSG00000027009	Itga4	6.82627	0.472087	3.85397	2.15e-43	6.55e-39
Fibroblasts	THBS2_ITGA4	THBS2	ITGA4	Mono_Macro	ENSMUSG00000027009	Itga4	2.85524	0.160462	4.1533	0	0
Fibroblasts	THBS2_ITGA4	THBS2	ITGA4	Schwann_cells	ENSMUSG00000027009	Itga4	2.19177	0.48894	2.16437	5.1e-10	1.56e-05
Fibroblasts	THBS2_ITGA4	THBS2	ITGA4	T_cell	ENSMUSG00000027009	Itga4	11.5997	0.427538	4.76189	1.01e-79	3.08e-75
Fibroblasts	THBS2_ITGA6	THBS2	ITGA6	Endothelial_cells	ENSMUSG00000027111	Itga6	6.43332	0.622331	3.36981	0	0
Fibroblasts	THBS2_CD47	THBS2	CD47	T_cell	ENSMUSG00000055447	Cd47	6.09378	2.88264	1.07995	1.81e-08	0.00055318
Fibroblasts	THBS2_NOTCH3	THBS2	NOTCH3	pericytes	ENSMUSG00000038146	Notch3	12.9097	0.281028	5.5216	0	0
Fibroblasts	THBS2_NOTCH3	THBS2	NOTCH3	Smooth_moscle_cells	ENSMUSG00000038146	Notch3	8.85713	1.10683	3.00041	2.24e-53	6.84e-49
Fibroblasts	DCN_ERBB4	DCN	ERBB4	Adipocytes	ENSMUSG00000062209	Erbb4	15.5066	1.81208	3.09716	2.18e-12	6.65e-08
Fibroblasts	DCN_ERBB4	DCN	ERBB4	Cardiomyocytes	ENSMUSG00000062209	Erbb4	9.13353	0.519076	4.13716	0	0
Fibroblasts	DCN_EGFR	DCN	EGFR	Fibroblasts	ENSMUSG00000020122	Egfr	6.40047	0.554532	3.52884	0	0
Fibroblasts	DCN_MET	DCN	MET	Adipocytes	ENSMUSG00000009376	Met	0.752675	0.08647	3.12175	1.01e-08	0.00030712
Fibroblasts	DCN_MET	DCN	MET	Epicardial_cells	ENSMUSG00000009376	Met	1.51766	0.0474566	4.9991	0	0
Fibroblasts	SFRP1_FZD6	SFRP1	FZD6	Lymphatic_ECs	ENSMUSG00000022297	Fzd6	2.52456	0.522992	2.27117	5.54e-38	1.69e-33
Fibroblasts	COL8A1_ITGA2	COL8A1	ITGA2	T_cell	ENSMUSG00000015533	Itga2	2.28297	0.0584312	5.28803	2.52e-60	7.68e-56
Fibroblasts	COL8A1_ITGA1	COL8A1	ITGA1	Endothelial_cells	ENSMUSG00000042284	Itga1	4.7932	1.61592	1.56863	1.84e-279	5.59e-275
Fibroblasts	COL8A1_ITGA1	COL8A1	ITGA1	pericytes	ENSMUSG00000042284	Itga1	9.88857	1.84079	2.42544	1.17e-285	3.55e-281
Fibroblasts	SERPING1_LRP1	SERPING1	LRP1	Fibroblasts	ENSMUSG00000040249	Lrp1	10.3294	1.4082	2.87483	0	0
Fibroblasts	SLIT2_ROBO1	SLIT2	ROBO1	Fibroblasts	ENSMUSG00000022883	Robo1	1.89425	0.211441	3.1633	0	0
Fibroblasts	SLIT2_ROBO4	SLIT2	ROBO4	Endothelial_cells	ENSMUSG00000032125	Robo4	1.50593	0.122258	3.62265	0	0
Fibroblasts	SLIT2_ROBO4	SLIT2	ROBO4	Lymphatic_ECs	ENSMUSG00000032125	Robo4	1.55329	0.455839	1.76873	4.12e-21	1.26e-16
Fibroblasts	COL1A2_CD93	COL1A2	CD93	Endocardial_cells	ENSMUSG00000027435	Cd93	4.01516	1.03284	1.95885	1.07e-191	3.27e-187
Fibroblasts	COL1A2_CD93	COL1A2	CD93	Endothelial_cells	ENSMUSG00000027435	Cd93	2.93463	0.747351	1.97332	5.03e-305	1.53e-300
Fibroblasts	COL1A2_ITGA2	COL1A2	ITGA2	T_cell	ENSMUSG00000015533	Itga2	2.28297	0.0584312	5.28803	2.52e-60	7.68e-56
Fibroblasts	COL1A2_CD44	COL1A2	CD44	Mono_Macro	ENSMUSG00000005087	Cd44	2.08922	0.205124	3.34839	2.39e-250	7.27e-246
Fibroblasts	COL1A2_CD44	COL1A2	CD44	T_cell	ENSMUSG00000005087	Cd44	4.48275	0.413608	3.43805	5.41e-32	1.65e-27
Fibroblasts	COL1A2_CD36	COL1A2	CD36	Endothelial_cells	ENSMUSG00000002944	Cd36	60.1187	8.28232	2.85971	0	0
Fibroblasts	COL3A1_DDR1	COL3A1	DDR1	Epicardial_cells	ENSMUSG00000003534	Ddr1	2.0666	0.172616	3.58162	6.79e-175	2.07e-170
Fibroblasts	COL3A1_DDR2	COL3A1	DDR2	Fibroblasts	ENSMUSG00000026674	Ddr2	3.22144	0.355875	3.17826	0	0
Fibroblasts	LAMB1_ITGA6	LAMB1	ITGA6	Endothelial_cells	ENSMUSG00000027111	Itga6	6.43332	0.622331	3.36981	0	0
Fibroblasts	LAMA2_ITGA7	LAMA2	ITGA7	pericytes	ENSMUSG00000025348	Itga7	2.26375	0.168141	3.75097	1.54e-304	4.69e-300
Fibroblasts	LAMA2_ITGA7	LAMA2	ITGA7	Smooth_moscle_cells	ENSMUSG00000025348	Itga7	2.08421	0.300859	2.79234	1.62e-33	4.94e-29
Fibroblasts	SERPINE2_LRP1	SERPINE2	LRP1	Fibroblasts	ENSMUSG00000040249	Lrp1	10.3294	1.4082	2.87483	0	0
Fibroblasts	C3_LRP1	C3	LRP1	Fibroblasts	ENSMUSG00000040249	Lrp1	10.3294	1.4082	2.87483	0	0
Fibroblasts	C3_C3AR1	C3	C3AR1	Mono_Macro	ENSMUSG00000040552	C3ar1	2.15954	0.0458236	5.55849	0	0
Fibroblasts	C3_ITGB2	C3	ITGB2	T_cell	ENSMUSG00000000290	Itgb2	3.00613	0.155362	4.2742	1.44e-67	4.4e-63
Fibroblasts	NGF_SORT1	NGF	SORT1	Schwann_cells	ENSMUSG00000068747	Sort1	1.53645	0.25159	2.61045	2.38e-07	0.00726027
Fibroblasts	NGF_SORT1	NGF	SORT1	Smooth_moscle_cells	ENSMUSG00000068747	Sort1	2.15672	0.237614	3.18215	7.63e-49	2.33e-44
Fibroblasts	NID1_ITGAV	NID1	ITGAV	Schwann_cells	ENSMUSG00000027087	Itgav	7.86558	1.03024	2.93258	6.06e-08	0.00184664
Fibroblasts	NID1_PTPRF	NID1	PTPRF	Epicardial_cells	ENSMUSG00000033295	Ptprf	2.01357	0.114296	4.13892	2.96e-261	9.03e-257
Fibroblasts	FBN1_ITGAV	FBN1	ITGAV	Schwann_cells	ENSMUSG00000027087	Itgav	7.86558	1.03024	2.93258	6.06e-08	0.00184664
Fibroblasts	COL5A2_DDR1	COL5A2	DDR1	Epicardial_cells	ENSMUSG00000003534	Ddr1	2.0666	0.172616	3.58162	6.79e-175	2.07e-170
Fibroblasts	CD34_SELL	CD34	SELL	B_cell	ENSMUSG00000026581	Sell	4.90081	0.0135923	8.49409	0	0
Fibroblasts	COL4A4_CD93	COL4A4	CD93	Endocardial_cells	ENSMUSG00000027435	Cd93	4.01516	1.03284	1.95885	1.07e-191	3.27e-187
Fibroblasts	COL4A4_CD93	COL4A4	CD93	Endothelial_cells	ENSMUSG00000027435	Cd93	2.93463	0.747351	1.97332	5.03e-305	1.53e-300
Fibroblasts	IGFBP4_LRP6	IGFBP4	LRP6	Mono_Macro	ENSMUSG00000030201	Lrp6	3.33748	1.39851	1.25487	1.29e-69	3.94e-65
Fibroblasts	ANGPT1_TEK	ANGPT1	TEK	Endocardial_cells	ENSMUSG00000006386	Tek	6.47664	1.99293	1.70035	5.49e-199	1.67e-194
Fibroblasts	ANGPT1_TEK	ANGPT1	TEK	Endothelial_cells	ENSMUSG00000006386	Tek	4.41416	1.70964	1.36845	7.48e-202	2.28e-197
Fibroblasts	ANGPT1_TIE1	ANGPT1	TIE1	Endocardial_cells	ENSMUSG00000033191	Tie1	2.77406	0.944785	1.55394	4.66e-159	1.42e-154
Fibroblasts	ANGPT1_TIE1	ANGPT1	TIE1	Endothelial_cells	ENSMUSG00000033191	Tie1	2.99081	0.476675	2.64946	0	0
Fibroblasts	ANGPT1_TIE1	ANGPT1	TIE1	Lymphatic_ECs	ENSMUSG00000033191	Tie1	2.65419	1.08754	1.28721	2.5e-22	7.63e-18
Fibroblasts	COL14A1_CD44	COL14A1	CD44	Mono_Macro	ENSMUSG00000005087	Cd44	2.08922	0.205124	3.34839	2.39e-250	7.27e-246
Fibroblasts	COL14A1_CD44	COL14A1	CD44	T_cell	ENSMUSG00000005087	Cd44	4.48275	0.413608	3.43805	5.41e-32	1.65e-27
Fibroblasts	EFEMP1_EGFR	EFEMP1	EGFR	Fibroblasts	ENSMUSG00000020122	Egfr	6.40047	0.554532	3.52884	0	0
Fibroblasts	LTBP1_ITGB5	LTBP1	ITGB5	Fibroblasts	ENSMUSG00000022817	Itgb5	2.45619	0.930096	1.40097	4.4e-189	1.34e-184
Fibroblasts	RGMA_NEO1	RGMA	NEO1	Cardiomyocytes	ENSMUSG00000032340	Neo1	2.04225	0.747117	1.45076	2.41e-121	7.35e-117
Fibroblasts	RGMA_NEO1	RGMA	NEO1	Epicardial_cells	ENSMUSG00000032340	Neo1	5.56694	0.815368	2.77136	1.67e-139	5.08e-135
Fibroblasts	COL4A5_CD93	COL4A5	CD93	Endocardial_cells	ENSMUSG00000027435	Cd93	4.01516	1.03284	1.95885	1.07e-191	3.27e-187
Fibroblasts	COL4A5_CD93	COL4A5	CD93	Endothelial_cells	ENSMUSG00000027435	Cd93	2.93463	0.747351	1.97332	5.03e-305	1.53e-300
Fibroblasts	ANXA1_EGFR	ANXA1	EGFR	Fibroblasts	ENSMUSG00000020122	Egfr	6.40047	0.554532	3.52884	0	0
Fibroblasts	ANXA1_DYSF	ANXA1	DYSF	Endothelial_cells	ENSMUSG00000033788	Dysf	6.70207	0.936473	2.8393	0	0
Fibroblasts	CALR_LRP1	CALR	LRP1	Fibroblasts	ENSMUSG00000040249	Lrp1	10.3294	1.4082	2.87483	0	0
Fibroblasts	CALR_ITGAV	CALR	ITGAV	Schwann_cells	ENSMUSG00000027087	Itgav	7.86558	1.03024	2.93258	6.06e-08	0.00184664
Fibroblasts	CALR_TSHR	CALR	TSHR	Adipocytes	ENSMUSG00000020963	Tshr	6.36651	0.00430384	10.5307	1.23e-231	3.74e-227
Fibroblasts	ADAM9_ITGAV	ADAM9	ITGAV	Schwann_cells	ENSMUSG00000027087	Itgav	7.86558	1.03024	2.93258	6.06e-08	0.00184664
Fibroblasts	ADAM9_ITGA6	ADAM9	ITGA6	Endothelial_cells	ENSMUSG00000027111	Itga6	6.43332	0.622331	3.36981	0	0
Fibroblasts	ADAM9_ITGB5	ADAM9	ITGB5	Fibroblasts	ENSMUSG00000022817	Itgb5	2.45619	0.930096	1.40097	4.4e-189	1.34e-184
Fibroblasts	CSF1_CSF1R	CSF1	CSF1R	Mono_Macro	ENSMUSG00000024621	Csf1r	8.44453	0.159412	5.72719	0	0

## Sheet: Sheet8
Target_Cluster	Gene ID	Gene Name	Target_Cluster_mean	Other_Cluster_mean	Log2FC	Pvalue	Qvalue
Lymphatic_ECs	ENSMUSG00000042453	Reln	23.6574	0.0350813	9.39737	0	0
Lymphatic_ECs	ENSMUSG00000026822	Lcn2	4.57068	0.036129	6.98311	0	0
Lymphatic_ECs	ENSMUSG00000028883	Sema3a	6.19511	0.181496	5.09312	5.9e-268	1.8e-263
Lymphatic_ECs	ENSMUSG00000040254	Sema3d	6.58079	0.440018	3.90263	7.41e-233	2.26e-228
Lymphatic_ECs	ENSMUSG00000040329	Il7	2.10491	0.0827919	4.66812	9.18e-135	2.8e-130
Lymphatic_ECs	ENSMUSG00000031196	F8	1.79041	0.0835935	4.42076	1.93e-113	5.9e-109
Lymphatic_ECs	ENSMUSG00000019890	Nts	1.99525	0.0872282	4.51563	1.35e-103	4.13e-99
Lymphatic_ECs	ENSMUSG00000039405	Prss23	5.22592	0.405064	3.68946	8.28e-99	2.52e-94
Lymphatic_ECs	ENSMUSG00000020902	Ntn1	10.2703	1.0294	3.3186	9.8e-92	2.99e-87
Lymphatic_ECs	ENSMUSG00000034684	Sema3f	1.88811	0.207233	3.18762	3.37e-66	1.03e-61
Lymphatic_ECs	ENSMUSG00000020044	Timp3	17.653	3.51152	2.32975	2.43e-63	7.41e-59
Lymphatic_ECs	ENSMUSG00000003617	Cp	16.2754	3.17369	2.35846	2.2e-57	6.71e-53
Lymphatic_ECs	ENSMUSG00000001435	Col18a1	2.29363	0.228207	3.32922	4.37e-54	1.33e-49
Lymphatic_ECs	ENSMUSG00000019647	Sema6a	11.8648	2.75968	2.10412	3.87e-50	1.18e-45
Lymphatic_ECs	ENSMUSG00000037820	Tgm2	3.70803	0.73059	2.34352	4.61e-41	1.41e-36
Lymphatic_ECs	ENSMUSG00000001300	Efnb2	2.8393	0.753965	1.91297	1.2e-36	3.67e-32
Lymphatic_ECs	ENSMUSG00000054693	Adam10	5.09425	1.72346	1.56356	1.26e-20	3.84e-16
Lymphatic_ECs	ENSMUSG00000025608	Podxl	3.77154	1.5057	1.32472	9.95e-20	3.03e-15
Lymphatic_ECs	ENSMUSG00000001029	Icam2	2.18275	0.869407	1.32805	1.31e-19	4.01e-15
Lymphatic_ECs	ENSMUSG00000017466	Timp2	7.38662	3.44304	1.10123	5.79e-19	1.77e-14
Lymphatic_ECs	ENSMUSG00000022912	Pros1	3.02154	1.04878	1.52657	1.03e-14	3.13e-10
Lymphatic_ECs	ENSMUSG00000026728	Vim	8.18825	3.97846	1.04135	2.89e-09	8.8e-05
Lymphatic_ECs	ENSMUSG00000002603	Tgfb1	1.47948	0.657585	1.16984	1.86e-07	0.00566664
Source(ligand)	Pair.Name	Ligand.ApprovedSymbol	Receptor.ApprovedSymbol	Target(receptor)	Gene ID	Gene Name	Target_Cluster_mean	Other_Cluster_mean	Log2FC	Pvalue	Qvalue
Lymphatic_ECs	RELN_VLDLR	RELN	VLDLR	Cardiomyocytes	ENSMUSG00000024924	Vldlr	3.54389	0.494947	2.83999	0	0
Lymphatic_ECs	LCN2_LRP2	LCN2	LRP2	Epicardial_cells	ENSMUSG00000027070	Lrp2	4.50823	0.0131909	8.41688	0	0
Lymphatic_ECs	SEMA3A_NRP1	SEMA3A	NRP1	Endothelial_cells	ENSMUSG00000025810	Nrp1	14.1382	5.24135	1.43159	0	0
Lymphatic_ECs	SEMA3A_NRP2	SEMA3A	NRP2	Endothelial_cells	ENSMUSG00000025969	Nrp2	5.89271	1.12525	2.38869	0	0
Lymphatic_ECs	SEMA3A_NRP2	SEMA3A	NRP2	Lymphatic_ECs	ENSMUSG00000025969	Nrp2	12.8226	2.1986	2.54403	2.28e-53	6.96e-49
Lymphatic_ECs	SEMA3A_PLXNA1	SEMA3A	PLXNA1	Adipocytes	ENSMUSG00000030084	Plxna1	1.3623	0.166029	3.03654	2.84e-07	0.00864332
Lymphatic_ECs	SEMA3A_PLXNA2	SEMA3A	PLXNA2	Endothelial_cells	ENSMUSG00000026640	Plxna2	4.60201	1.05101	2.13049	6.17e-304	1.88e-299
Lymphatic_ECs	SEMA3A_PLXNA4	SEMA3A	PLXNA4	Endocardial_cells	ENSMUSG00000029765	Plxna4	6.07497	2.83148	1.10132	2.59e-137	7.9e-133
Lymphatic_ECs	SEMA3A_PLXNA4	SEMA3A	PLXNA4	Epicardial_cells	ENSMUSG00000029765	Plxna4	35.1602	2.23262	3.97713	1.67e-212	5.1e-208
Lymphatic_ECs	SEMA3D_NRP1	SEMA3D	NRP1	Endothelial_cells	ENSMUSG00000025810	Nrp1	14.1382	5.24135	1.43159	0	0
Lymphatic_ECs	IL7_IL2RG	IL7	IL2RG	T_cell	ENSMUSG00000031304	Il2rg	2.92214	0.159759	4.19306	1.24e-74	3.78e-70
Lymphatic_ECs	IL7_IL7R	IL7	IL7R	T_cell	ENSMUSG00000003882	Il7r	7.83217	0.00746945	10.0342	0	0
Lymphatic_ECs	F8_LRP1	F8	LRP1	Fibroblasts	ENSMUSG00000040249	Lrp1	10.3294	1.4082	2.87483	0	0
Lymphatic_ECs	NTS_SORT1	NTS	SORT1	Schwann_cells	ENSMUSG00000068747	Sort1	1.53645	0.25159	2.61045	2.38e-07	0.00726027
Lymphatic_ECs	NTS_SORT1	NTS	SORT1	Smooth_moscle_cells	ENSMUSG00000068747	Sort1	2.15672	0.237614	3.18215	7.63e-49	2.33e-44
Lymphatic_ECs	NTN1_NEO1	NTN1	NEO1	Cardiomyocytes	ENSMUSG00000032340	Neo1	2.04225	0.747117	1.45076	2.41e-121	7.35e-117
Lymphatic_ECs	NTN1_NEO1	NTN1	NEO1	Epicardial_cells	ENSMUSG00000032340	Neo1	5.56694	0.815368	2.77136	1.67e-139	5.08e-135
Lymphatic_ECs	SEMA3F_NRP1	SEMA3F	NRP1	Endothelial_cells	ENSMUSG00000025810	Nrp1	14.1382	5.24135	1.43159	0	0
Lymphatic_ECs	SEMA3F_NRP2	SEMA3F	NRP2	Endothelial_cells	ENSMUSG00000025969	Nrp2	5.89271	1.12525	2.38869	0	0
Lymphatic_ECs	SEMA3F_NRP2	SEMA3F	NRP2	Lymphatic_ECs	ENSMUSG00000025969	Nrp2	12.8226	2.1986	2.54403	2.28e-53	6.96e-49
Lymphatic_ECs	TIMP3_KDR	TIMP3	KDR	Endothelial_cells	ENSMUSG00000062960	Kdr	9.58148	0.764645	3.64739	0	0
Lymphatic_ECs	TIMP3_KDR	TIMP3	KDR	Lymphatic_ECs	ENSMUSG00000062960	Kdr	5.99933	2.93385	1.03201	1.23e-27	3.74e-23
Lymphatic_ECs	COL18A1_KDR	COL18A1	KDR	Endothelial_cells	ENSMUSG00000062960	Kdr	9.58148	0.764645	3.64739	0	0
Lymphatic_ECs	COL18A1_KDR	COL18A1	KDR	Lymphatic_ECs	ENSMUSG00000062960	Kdr	5.99933	2.93385	1.03201	1.23e-27	3.74e-23
Lymphatic_ECs	SEMA6A_PLXNA2	SEMA6A	PLXNA2	Endothelial_cells	ENSMUSG00000026640	Plxna2	4.60201	1.05101	2.13049	6.17e-304	1.88e-299
Lymphatic_ECs	SEMA6A_PLXNA4	SEMA6A	PLXNA4	Endocardial_cells	ENSMUSG00000029765	Plxna4	6.07497	2.83148	1.10132	2.59e-137	7.9e-133
Lymphatic_ECs	SEMA6A_PLXNA4	SEMA6A	PLXNA4	Epicardial_cells	ENSMUSG00000029765	Plxna4	35.1602	2.23262	3.97713	1.67e-212	5.1e-208
Lymphatic_ECs	TGM2_SDC4	TGM2	SDC4	Epicardial_cells	ENSMUSG00000017009	Sdc4	1.68836	0.252868	2.73916	1.2e-75	3.67e-71
Lymphatic_ECs	TGM2_SDC4	TGM2	SDC4	Schwann_cells	ENSMUSG00000017009	Sdc4	2.0625	0.287659	2.84196	6.25e-08	0.00190526
Lymphatic_ECs	EFNB2_EPHA4	EFNB2	EPHA4	Endocardial_cells	ENSMUSG00000026235	Epha4	2.17131	0.882898	1.29825	5.98e-73	1.82e-68
Lymphatic_ECs	EFNB2_EPHB1	EFNB2	EPHB1	Epicardial_cells	ENSMUSG00000032537	Ephb1	2.15223	0.223084	3.27017	8.13e-160	2.48e-155
Lymphatic_ECs	EFNB2_EPHB2	EFNB2	EPHB2	Schwann_cells	ENSMUSG00000028664	Ephb2	4.10633	0.0217325	7.56185	8.27e-194	2.52e-189
Lymphatic_ECs	EFNB2_EPHB4	EFNB2	EPHB4	Endocardial_cells	ENSMUSG00000029710	Ephb4	2.35122	0.724522	1.69831	2.8e-124	8.52e-120
Lymphatic_ECs	EFNB2_EPHB4	EFNB2	EPHB4	Endothelial_cells	ENSMUSG00000029710	Ephb4	1.91389	0.518156	1.88505	4.18e-183	1.28e-178
Lymphatic_ECs	EFNB2_EPHB4	EFNB2	EPHB4	Lymphatic_ECs	ENSMUSG00000029710	Ephb4	2.13835	0.852658	1.32646	9.68e-14	2.95e-09
Lymphatic_ECs	EFNB2_GRM1	EFNB2	GRM1	Cardiomyocytes	ENSMUSG00000019828	Grm1	9.15652	0.12184	6.23175	0	0
Lymphatic_ECs	EFNB2_PECAM1	EFNB2	PECAM1	Endocardial_cells	ENSMUSG00000020717	Pecam1	17.6387	3.09155	2.51234	0	0
Lymphatic_ECs	EFNB2_PECAM1	EFNB2	PECAM1	Endothelial_cells	ENSMUSG00000020717	Pecam1	9.43941	2.67469	1.81933	0	0
Lymphatic_ECs	ADAM10_AXL	ADAM10	AXL	Fibroblasts	ENSMUSG00000002602	Axl	4.08695	0.558985	2.87014	0	0
Lymphatic_ECs	PODXL_SELL	PODXL	SELL	B_cell	ENSMUSG00000026581	Sell	4.90081	0.0135923	8.49409	0	0
Lymphatic_ECs	ICAM2_ITGB2	ICAM2	ITGB2	T_cell	ENSMUSG00000000290	Itgb2	3.00613	0.155362	4.2742	1.44e-67	4.4e-63
Lymphatic_ECs	ICAM2_ITGAL	ICAM2	ITGAL	T_cell	ENSMUSG00000030830	Itgal	3.21942	0.0319857	6.65323	4.34e-283	1.32e-278
Lymphatic_ECs	PROS1_AXL	PROS1	AXL	Fibroblasts	ENSMUSG00000002602	Axl	4.08695	0.558985	2.87014	0	0
Lymphatic_ECs	VIM_CD44	VIM	CD44	Mono_Macro	ENSMUSG00000005087	Cd44	2.08922	0.205124	3.34839	2.39e-250	7.27e-246
Lymphatic_ECs	VIM_CD44	VIM	CD44	T_cell	ENSMUSG00000005087	Cd44	4.48275	0.413608	3.43805	5.41e-32	1.65e-27
Lymphatic_ECs	TGFB1_ENG	TGFB1	ENG	Schwann_cells	ENSMUSG00000027087	Itgav	7.86558	1.03024	2.93258	6.06e-08	0.00184664
Lymphatic_ECs	TGFB1_ENG	TGFB1	ENG	Endocardial_cells	ENSMUSG00000026814	Eng	26.1105	3.68437	2.82514	0	0
Lymphatic_ECs	TGFB1_ENG	TGFB1	ENG	Endothelial_cells	ENSMUSG00000026814	Eng	9.5453	4.34932	1.134	0	0
Lymphatic_ECs	TGFB1_ITGB8	TGFB1	ITGB8	Epicardial_cells	ENSMUSG00000025321	Itgb8	1.62289	0.264771	2.61574	9.38e-67	2.86e-62
Lymphatic_ECs	TGFB1_ITGB8	TGFB1	ITGB8	Schwann_cells	ENSMUSG00000025321	Itgb8	1.61151	0.29845	2.43285	1.91e-10	5.83e-06
Lymphatic_ECs	TGFB1_SDC2	TGFB1	SDC2	Fibroblasts	ENSMUSG00000022261	Sdc2	6.66596	0.732648	3.18562	0	0
Lymphatic_ECs	TGFB1_ITGB6	TGFB1	ITGB6	Cardiomyocytes	ENSMUSG00000026971	Itgb6	1.61157	0.0381578	5.40035	0	0
Lymphatic_ECs	TGFB1_TGFBR1	TGFB1	TGFBR1	Mono_Macro	ENSMUSG00000007613	Tgfbr1	3.4027	1.07496	1.66239	4.25e-42	1.3e-37
Lymphatic_ECs	TGFB1_TGFBR3	TGFB1	TGFBR3	Fibroblasts	ENSMUSG00000029287	Tgfbr3	5.16083	1.78296	1.53333	0	0
Lymphatic_ECs	TGFB1_TGFBR2	TGFB1	TGFBR2	B_cell	ENSMUSG00000032440	Tgfbr2	6.94219	2.21202	1.65003	2.39e-08	0.000728435
Lymphatic_ECs	TGFB1_TGFBR2	TGFB1	TGFBR2	Lymphatic_ECs	ENSMUSG00000032440	Tgfbr2	8.79576	2.15343	2.03017	1.22e-47	3.71e-43
Lymphatic_ECs	TGFB1_TGFBR2	TGFB1	TGFBR2	Mono_Macro	ENSMUSG00000032440	Tgfbr2	4.45294	1.91443	1.21784	1.51e-98	4.6e-94

## Sheet: Sheet9
Target_Cluster	Gene ID	Gene Name	Target_Cluster_mean	Other_Cluster_mean	Log2FC	Pvalue	Qvalue
Mono_Macro	ENSMUSG00000039109	F13a1	35.02	0.247208	7.14631	0	0
Mono_Macro	ENSMUSG00000021423	Ly86	4.81106	0.0649725	6.21038	0	0
Mono_Macro	ENSMUSG00000036887	C1qa	22.4789	0.380145	5.88588	0	0
Mono_Macro	ENSMUSG00000036905	C1qb	18.846	0.348236	5.75805	0	0
Mono_Macro	ENSMUSG00000051439	Cd14	1.59778	0.0545652	4.87194	0	0
Mono_Macro	ENSMUSG00000029373	Pf4	7.64866	0.333182	4.52083	0	0
Mono_Macro	ENSMUSG00000028019	Pdgfc	2.38565	0.126908	4.23253	0	0
Mono_Macro	ENSMUSG00000002985	Apoe	77.1626	9.8851	2.96457	0	0
Mono_Macro	ENSMUSG00000017754	Pltp	6.19302	0.888098	2.80185	1.28e-304	3.89e-300
Mono_Macro	ENSMUSG00000001741	Il16	1.52044	0.314226	2.27461	2.04e-146	6.22e-142
Mono_Macro	ENSMUSG00000020053	Igf1	3.35062	1.01421	1.72408	4.03e-145	1.23e-140
Mono_Macro	ENSMUSG00000020458	Rtn4	6.07369	2.45491	1.3069	9.69e-128	2.95e-123
Mono_Macro	ENSMUSG00000004207	Psap	9.54577	4.60182	1.05266	1.2e-90	3.66e-86
Mono_Macro	ENSMUSG00000031712	Il15	2.34043	0.942087	1.31284	6.65e-63	2.03e-58
Source(ligand)	Pair.Name	Ligand.ApprovedSymbol	Receptor.ApprovedSymbol	Target(receptor)	Gene ID	Gene Name	Target_Cluster_mean	Other_Cluster_mean	Log2FC	Pvalue	Qvalue
Mono_Macro	F13A1_ITGA9	F13A1	ITGA9	Endocardial_cells	ENSMUSG00000039115	Itga9	3.12875	1.19805	1.38489	8.39e-76	2.56e-71
Mono_Macro	F13A1_ITGA9	F13A1	ITGA9	Lymphatic_ECs	ENSMUSG00000039115	Itga9	7.63646	1.29667	2.55809	2.1e-56	6.41e-52
Mono_Macro	F13A1_ITGA9	F13A1	ITGA9	Mono_Macro	ENSMUSG00000039115	Itga9	2.58351	1.19615	1.11094	4.81e-46	1.47e-41
Mono_Macro	F13A1_ITGA4	F13A1	ITGA4	B_cell	ENSMUSG00000027009	Itga4	6.82627	0.472087	3.85397	2.15e-43	6.55e-39
Mono_Macro	F13A1_ITGA4	F13A1	ITGA4	Mono_Macro	ENSMUSG00000027009	Itga4	2.85524	0.160462	4.1533	0	0
Mono_Macro	F13A1_ITGA4	F13A1	ITGA4	Schwann_cells	ENSMUSG00000027009	Itga4	2.19177	0.48894	2.16437	5.1e-10	1.56e-05
Mono_Macro	F13A1_ITGA4	F13A1	ITGA4	T_cell	ENSMUSG00000027009	Itga4	11.5997	0.427538	4.76189	1.01e-79	3.08e-75
Mono_Macro	LY86_CD180	LY86	CD180	B_cell	ENSMUSG00000021624	Cd180	1.91867	0.156815	3.61298	9.78e-17	2.98e-12
Mono_Macro	C1QA_CD93	C1QA	CD93	Endocardial_cells	ENSMUSG00000027435	Cd93	4.01516	1.03284	1.95885	1.07e-191	3.27e-187
Mono_Macro	C1QA_CD93	C1QA	CD93	Endothelial_cells	ENSMUSG00000027435	Cd93	2.93463	0.747351	1.97332	5.03e-305	1.53e-300
Mono_Macro	C1QA_CSPG4	C1QA	CSPG4	pericytes	ENSMUSG00000032911	Cspg4	5.8591	0.105232	5.79904	0	0
Mono_Macro	C1QA_CSPG4	C1QA	CSPG4	Smooth_moscle_cells	ENSMUSG00000032911	Cspg4	3.25113	0.488147	2.73555	5.11e-51	1.56e-46
Mono_Macro	C1QB_LRP1	C1QB	LRP1	Fibroblasts	ENSMUSG00000040249	Lrp1	10.3294	1.4082	2.87483	0	0
Mono_Macro	CD14_ITGA4	CD14	ITGA4	B_cell	ENSMUSG00000027009	Itga4	6.82627	0.472087	3.85397	2.15e-43	6.55e-39
Mono_Macro	CD14_ITGA4	CD14	ITGA4	Mono_Macro	ENSMUSG00000027009	Itga4	2.85524	0.160462	4.1533	0	0
Mono_Macro	CD14_ITGA4	CD14	ITGA4	Schwann_cells	ENSMUSG00000027009	Itga4	2.19177	0.48894	2.16437	5.1e-10	1.56e-05
Mono_Macro	CD14_ITGA4	CD14	ITGA4	T_cell	ENSMUSG00000027009	Itga4	11.5997	0.427538	4.76189	1.01e-79	3.08e-75
Mono_Macro	PF4_SDC2	PF4	SDC2	Fibroblasts	ENSMUSG00000022261	Sdc2	6.66596	0.732648	3.18562	0	0
Mono_Macro	PF4_THBD	PF4	THBD	Lymphatic_ECs	ENSMUSG00000074743	Thbd	1.98516	0.608975	1.7048	1.04e-12	3.16e-08
Mono_Macro	PF4_FGFR2	PF4	FGFR2	Cardiomyocytes	ENSMUSG00000030849	Fgfr2	12.145	3.59492	1.75632	3.41e-73	1.04e-68
Mono_Macro	PDGFC_KDR	PDGFC	KDR	Endothelial_cells	ENSMUSG00000062960	Kdr	9.58148	0.764645	3.64739	0	0
Mono_Macro	PDGFC_KDR	PDGFC	KDR	Lymphatic_ECs	ENSMUSG00000062960	Kdr	5.99933	2.93385	1.03201	1.23e-27	3.74e-23
Mono_Macro	PDGFC_FLT4	PDGFC	FLT4	Lymphatic_ECs	ENSMUSG00000020357	Flt4	10.6358	0.239647	5.47188	0	0
Mono_Macro	PDGFC_PDGFRA	PDGFC	PDGFRA	Fibroblasts	ENSMUSG00000029231	Pdgfra	8.43711	0.33274	4.66428	0	0
Mono_Macro	APOE_LRP1	APOE	LRP1	Fibroblasts	ENSMUSG00000040249	Lrp1	10.3294	1.4082	2.87483	0	0
Mono_Macro	APOE_LRP2	APOE	LRP2	Epicardial_cells	ENSMUSG00000027070	Lrp2	4.50823	0.0131909	8.41688	0	0
Mono_Macro	APOE_SORL1	APOE	SORL1	B_cell	ENSMUSG00000049313	Sorl1	5.65083	0.120934	5.54617	2.81e-87	8.56e-83
Mono_Macro	APOE_SORL1	APOE	SORL1	T_cell	ENSMUSG00000049313	Sorl1	3.56758	0.118637	4.91032	1.19e-125	3.64e-121
Mono_Macro	APOE_VLDLR	APOE	VLDLR	Cardiomyocytes	ENSMUSG00000024924	Vldlr	3.54389	0.494947	2.83999	0	0
Mono_Macro	PLTP_ABCA1	PLTP	ABCA1	Lymphatic_ECs	ENSMUSG00000015243	Abca1	4.68947	1.34661	1.80009	1.95e-22	5.93e-18
Mono_Macro	PLTP_ABCA1	PLTP	ABCA1	Mono_Macro	ENSMUSG00000015243	Abca1	4.21619	0.98571	2.09671	1.93e-162	5.89e-158
Mono_Macro	IL16_KCND2	IL16	KCND2	Cardiomyocytes	ENSMUSG00000060882	Kcnd2	11.1537	1.06281	3.39157	0	0
Mono_Macro	IL16_KCND2	IL16	KCND2	Epicardial_cells	ENSMUSG00000060882	Kcnd2	28.0273	1.8863	3.8932	0	0
Mono_Macro	PSAP_LRP1	PSAP	LRP1	Fibroblasts	ENSMUSG00000040249	Lrp1	10.3294	1.4082	2.87483	0	0
Mono_Macro	PSAP_GPR37L1	PSAP	GPR37L1	Schwann_cells	ENSMUSG00000026424	Gpr37l1	2.76962	0.00193684	10.4818	0	0
Mono_Macro	IL15_IL2RG	IL15	IL2RG	T_cell	ENSMUSG00000031304	Il2rg	2.92214	0.159759	4.19306	1.24e-74	3.78e-70
Mono_Macro	IL15_IL15RA	IL15	IL15RA	Adipocytes	ENSMUSG00000023206	Il15ra	6.84897	0.478624	3.83892	4.45e-08	0.00135587
Mono_Macro	IL15_IL2RB	IL15	IL2RB	T_cell	ENSMUSG00000068227	Il2rb	6.15209	0.00439969	10.4495	0	0

[truncated: 5 more sheets: Sheet10, Sheet11, Sheet12, Sheet13, Sheet14]
