# Supplementary material for: Single-cell RNA-seq of heart reveals intercellular communication drivers of myocardial fibrosis in diabetic cardiomyopathy
Source: eLife. 2023 Apr 3;12:e80479. doi: 10.7554/eLife.80479 (PMC10110238; doi:10.7554/eLife.80479)
Supplement: Supplementary file 11. [file elife-80479-supp11.xls]

Supplementary file 11: Significantly differentially-expressed ligands in each cell population
Cluster	GeneID	GeneName	Control	T2DM	cells_1	cells_2	pct_1	pct_2	log2FC	p_value	p_val_adjust	significance	Name
Adipocytes	ENSMUSG00000029019	Nppb	2.572575603	0	25	7	0.36	0	-14.65098193	0.032301672	1	down	NPPB
Adipocytes	ENSMUSG00000002985	Apoe	22.5996836	6.192417194	25	7	1	0.714	-1.867711084	0.004559204	1	down	APOE
Adipocytes	ENSMUSG00000020053	Igf1	4.009844268	5.882553782	25	7	0.52	0.286	0.552884945	0.036950321	1	up	IGF1
Adipocytes	ENSMUSG00000027523	Gnas	5.928200976	16.56026723	25	7	0.72	0.714	1.482044066	0.001091056	1	up	GNAS
Adipocytes	ENSMUSG00000054555	Adam12	1.831738918	10.70740778	25	7	0.28	0.857	2.547258174	0.007520889	1	up	ADAM12
Adipocytes	ENSMUSG00000038593	Tctn1	0	1.077500904	25	7	0	0.286	13.39553535	0.018912682	1	up	TCTN1
B_cell	ENSMUSG00000029019	Nppb	4.660113535	0	30	37	0.467	0	-15.50810844	3.57E-07	0.010886082	down	NPPB
B_cell	ENSMUSG00000041616	Nppa	11.48440722	3.188119077	30	37	0.733	0.378	-1.848866283	0.00297258	1	down	NPPA
B_cell	ENSMUSG00000001506	Col1a1	0	0.597534984	30	37	0	0.108	12.54504889	0.040687412	1	up	COL1A1
Cardiomyocytes	ENSMUSG00000029019	Nppb	9.698325009	4.804320871	2035	1741	0.555	0.367	-1.01338794	4.48E-44	1.36E-39	down	NPPB
Cardiomyocytes	ENSMUSG00000002985	Apoe	5.30870988	3.095123327	2035	1741	0.431	0.325	-0.77834497	5.55E-25	1.69E-20	down	APOE
Cardiomyocytes	ENSMUSG00000041616	Nppa	60.21782393	32.65866187	2035	1741	0.764	0.386	-0.882722873	6.46E-128	1.97E-123	down	NPPA
Cardiomyocytes	ENSMUSG00000024164	C3	1.514565823	0.727710317	2035	1741	0.175	0.088	-1.057365122	2.10E-17	6.39E-13	down	C3
Cardiomyocytes	ENSMUSG00000019929	Dcn	6.840369719	4.055242686	2035	1741	0.436	0.352	-0.754271564	6.14E-20	1.87E-15	down	DCN
Cardiomyocytes	ENSMUSG00000026365	Cfh	2.318278958	1.492278342	2035	1741	0.238	0.186	-0.635503078	1.59E-10	4.84E-06	down	CFH
Cardiomyocytes	ENSMUSG00000023224	Serping1	0.903534806	0.588348618	2035	1741	0.117	0.09	-0.618823393	3.93E-06	0.11968207	down	SERPING1
Cardiomyocytes	ENSMUSG00000005397	Nid1	0.739974652	0.482451401	2035	1741	0.114	0.082	-0.616988177	1.67E-05	0.508853648	down	NID1
Cardiomyocytes	ENSMUSG00000064080	Fbln2	0.784745094	0.557181203	2035	1741	0.109	0.072	-0.494002441	0.000276687	1	down	FBLN2
Cardiomyocytes	ENSMUSG00000003814	Calr	1.6220655	1.216966135	2035	1741	0.253	0.213	-0.414513451	3.12E-11	9.52E-07	down	CALR
Cardiomyocytes	ENSMUSG00000048915	Efna5	1.696697179	2.182354698	2035	1741	0.207	0.314	0.36313758	1.25E-19	3.82E-15	up	EFNA5
Cardiomyocytes	ENSMUSG00000020902	Ntn1	0.816385588	1.052120457	2035	1741	0.134	0.21	0.365937678	9.73E-17	2.96E-12	up	NTN1
Cardiomyocytes	ENSMUSG00000015647	Lama5	0.574143035	0.752250192	2035	1741	0.112	0.202	0.38974289	7.71E-26	2.35E-21	up	LAMA5
Cardiomyocytes	ENSMUSG00000030605	Mfge8	0.599014181	0.821438638	2035	1741	0.114	0.168	0.455497446	1.49E-09	4.55E-05	up	MFGE8
Cardiomyocytes	ENSMUSG00000031274	Col4a5	1.256815296	1.740436202	2035	1741	0.173	0.297	0.469644392	2.58E-26	7.85E-22	up	COL4A5
Cardiomyocytes	ENSMUSG00000048482	Bdnf	0.289870264	0.424914521	2035	1741	0.053	0.105	0.551607174	5.20E-14	1.58E-09	up	BDNF
Cardiomyocytes	ENSMUSG00000022309	Angpt1	2.663844193	3.939889024	2035	1741	0.233	0.362	0.564627751	8.12E-21	2.48E-16	up	ANGPT1
Cardiomyocytes	ENSMUSG00000056427	Slit3	1.095334648	1.626288125	2035	1741	0.097	0.148	0.570168169	2.33E-07	0.007096296	up	SLIT3
Cardiomyocytes	ENSMUSG00000027200	Sema6d	0.336665463	0.515659319	2035	1741	0.065	0.101	0.614953795	8.02E-06	0.244386346	up	SEMA6D
Cardiomyocytes	ENSMUSG00000039239	Tgfb2	0.424820076	0.692714033	2035	1741	0.075	0.157	0.705276643	1.15E-21	3.49E-17	up	TGFB2
Cardiomyocytes	ENSMUSG00000036585	Fgf1	1.934935143	3.1800039	2035	1741	0.274	0.465	0.716714133	2.52E-35	7.69E-31	up	FGF1
Cardiomyocytes	ENSMUSG00000041936	Agrn	0.206905956	0.401658973	2035	1741	0.045	0.115	0.956657969	1.39E-20	4.24E-16	up	AGRN
Cardiomyocytes	ENSMUSG00000037411	Serpine1	0.22416672	0.461271345	2035	1741	0.049	0.118	1.040712858	1.78E-17	5.43E-13	up	SERPINE1
Endocardial_cells	ENSMUSG00000029019	Nppb	1.940594317	0.557456135	1311	1009	0.236	0.1	-1.799383925	3.22E-23	9.81E-19	down	NPPB
Endocardial_cells	ENSMUSG00000041616	Nppa	12.83326931	3.625390573	1311	1009	0.724	0.376	-1.823651862	2.11E-76	6.43E-72	down	NPPA
Endocardial_cells	ENSMUSG00000024164	C3	1.098528948	0.718473772	1311	1009	0.13	0.098	-0.612496027	0.001501233	1	down	C3
Endocardial_cells	ENSMUSG00000026365	Cfh	42.81995536	55.26726513	1311	1009	0.971	0.973	0.368141173	9.08E-17	2.77E-12	up	CFH
Endocardial_cells	ENSMUSG00000048915	Efna5	1.194809941	0.787688444	1311	1009	0.134	0.094	-0.601021728	0.005295327	1	down	EFNA5
Endocardial_cells	ENSMUSG00000031274	Col4a5	0.811499384	0.567560196	1311	1009	0.135	0.115	-0.515740185	0.000421659	1	down	COL4A5
Endocardial_cells	ENSMUSG00000022309	Angpt1	1.463390916	1.121198302	1311	1009	0.191	0.172	-0.384243658	0.020740176	1	down	ANGPT1
Endocardial_cells	ENSMUSG00000041936	Agrn	0.510037365	1.177016906	1311	1009	0.1	0.237	1.20629993	1.80E-18	5.49E-14	up	AGRN
Endocardial_cells	ENSMUSG00000015568	Lpl	6.326041258	3.554560309	1311	1009	0.587	0.475	-0.831614071	2.07E-23	6.32E-19	down	LPL
Endocardial_cells	ENSMUSG00000021270	Hsp90aa1	1.151808953	0.746154129	1311	1009	0.199	0.167	-0.626287777	4.81E-10	1.47E-05	down	HSP90AA1
Endocardial_cells	ENSMUSG00000062991	Nrg1	11.72440184	7.828985629	1311	1009	0.401	0.286	-0.582610898	1.74E-08	0.000529732	down	NRG1
Endocardial_cells	ENSMUSG00000001494	Sost	0.694448592	0.496460533	1311	1009	0.117	0.092	-0.484106032	0.013516266	1	down	SOST
Endocardial_cells	ENSMUSG00000024962	Vegfb	1.025496691	0.754127357	1311	1009	0.17	0.157	-0.443392126	2.15E-06	0.065403965	down	VEGFB
Endocardial_cells	ENSMUSG00000039004	Bmp6	10.90387754	8.437488384	1311	1009	0.646	0.584	-0.369951881	1.18E-05	0.360405859	down	BMP6
Endocardial_cells	ENSMUSG00000028763	Hspg2	2.528781323	3.253758107	1311	1009	0.38	0.514	0.363652005	3.39E-11	1.03E-06	up	HSPG2
Endocardial_cells	ENSMUSG00000052593	Adam17	0.55073456	0.714661655	1311	1009	0.115	0.157	0.375843161	0.003333212	1	up	ADAM17
Endocardial_cells	ENSMUSG00000026042	Col5a2	4.301343556	5.622707479	1311	1009	0.49	0.598	0.386469744	6.74E-07	0.020547363	up	COL5A2
Endocardial_cells	ENSMUSG00000026238	Ptma	3.590839759	4.694276276	1311	1009	0.47	0.557	0.386572034	0.00012442	1	up	PTMA
Endocardial_cells	ENSMUSG00000001930	Vwf	14.23256225	18.76553479	1311	1009	0.773	0.848	0.398887546	1.08E-09	3.29E-05	up	VWF
Endocardial_cells	ENSMUSG00000037820	Tgm2	1.099509356	1.457450453	1311	1009	0.181	0.274	0.406554736	1.42E-10	4.32E-06	up	TGM2
Endocardial_cells	ENSMUSG00000026043	Col3a1	1.029743435	1.36755401	1311	1009	0.15	0.191	0.409278279	0.022088667	1	up	COL3A1
Endocardial_cells	ENSMUSG00000039304	Tnfsf10	1.481971239	1.974037003	1311	1009	0.23	0.349	0.413607319	4.41E-12	1.35E-07	up	TNFSF10
Endocardial_cells	ENSMUSG00000025608	Podxl	1.817355732	2.510828781	1311	1009	0.281	0.411	0.466300884	6.66E-12	2.03E-07	up	PODXL
Endocardial_cells	ENSMUSG00000028041	Adam15	0.56325143	0.788392036	1311	1009	0.111	0.167	0.485060999	4.82E-05	1	up	ADAM15
Endocardial_cells	ENSMUSG00000017493	Igfbp4	2.537672372	3.689124275	1311	1009	0.358	0.491	0.539754825	9.93E-10	3.03E-05	up	IGFBP4
Endocardial_cells	ENSMUSG00000037405	Icam1	0.795877133	1.168708909	1311	1009	0.149	0.211	0.554240189	0.00050219	1	up	ICAM1
Endocardial_cells	ENSMUSG00000002603	Tgfb1	0.579635473	0.890553282	1311	1009	0.114	0.189	0.619469157	2.28E-07	0.006963115	up	TGFB1
Endocardial_cells	ENSMUSG00000027954	Efna1	0.421305571	0.671468278	1311	1009	0.084	0.145	0.672324697	2.16E-06	0.065900497	up	EFNA1
Endocardial_cells	ENSMUSG00000005705	Agrp	0.404211661	0.670736047	1311	1009	0.079	0.138	0.730492399	9.40E-06	0.286559413	up	AGRP
Endocardial_cells	ENSMUSG00000060802	B2m	4.717571842	7.848986262	1311	1009	0.574	0.728	0.734449646	1.00E-23	3.05E-19	up	B2M
Endocardial_cells	ENSMUSG00000034684	Sema3f	0.299863889	0.568436358	1311	1009	0.062	0.123	0.922463779	5.46E-07	0.016628175	up	SEMA3F
Endocardial_cells	ENSMUSG00000033880	Lgals3bp	0.127361612	0.474483737	1311	1009	0.027	0.106	1.896599848	1.25E-14	3.81E-10	up	LGALS3BP
Endothelial_cells	ENSMUSG00000029019	Nppb	2.463586427	0.672907071	2402	2880	0.274	0.096	-1.872125077	7.93E-70	2.42E-65	down	NPPB
Endothelial_cells	ENSMUSG00000002985	Apoe	5.55721969	2.831004908	2402	2880	0.478	0.367	-0.973024025	2.08E-42	6.33E-38	down	APOE
Endothelial_cells	ENSMUSG00000041616	Nppa	11.32538869	2.845479671	2402	2880	0.697	0.319	-1.992778825	3.88E-207	1.18E-202	down	NPPA
Endothelial_cells	ENSMUSG00000024164	C3	1.277328057	0.610664227	2402	2880	0.128	0.086	-1.064554574	1.22E-12	3.71E-08	down	C3
Endothelial_cells	ENSMUSG00000019929	Dcn	6.258145724	3.787305232	2402	2880	0.365	0.355	-0.724548516	1.46E-18	4.46E-14	down	DCN
Endothelial_cells	ENSMUSG00000026365	Cfh	2.151987007	1.383255605	2402	2880	0.219	0.184	-0.637564343	7.25E-12	2.21E-07	down	CFH
Endothelial_cells	ENSMUSG00000023224	Serping1	1.017824892	0.602050378	2402	2880	0.124	0.092	-0.757435387	2.90E-08	0.000884413	down	SERPING1
Endothelial_cells	ENSMUSG00000064080	Fbln2	2.291707595	1.572122702	2402	2880	0.264	0.201	-0.543680343	9.55E-11	2.91E-06	down	FBLN2
Endothelial_cells	ENSMUSG00000041936	Agrn	0.343505915	0.841742874	2402	2880	0.062	0.153	1.292796115	4.54E-26	1.38E-21	up	AGRN
Endothelial_cells	ENSMUSG00000015568	Lpl	11.54033311	8.265145861	2402	2880	0.761	0.684	-0.481567728	4.23E-30	1.29E-25	down	LPL
Endothelial_cells	ENSMUSG00000021270	Hsp90aa1	1.508864821	0.858338495	2402	2880	0.236	0.154	-0.813772494	2.12E-20	6.45E-16	down	HSP90AA1
Endothelial_cells	ENSMUSG00000024962	Vegfb	1.105667088	0.724688035	2402	2880	0.174	0.127	-0.609416492	3.45E-10	1.05E-05	down	VEGFB
Endothelial_cells	ENSMUSG00000028763	Hspg2	4.311899317	5.990636413	2402	2880	0.516	0.644	0.474376408	2.84E-22	8.66E-18	up	HSPG2
Endothelial_cells	ENSMUSG00000026043	Col3a1	1.456736339	0.79312111	2402	2880	0.142	0.119	-0.877043837	1.10E-12	3.36E-08	down	COL3A1
Endothelial_cells	ENSMUSG00000039304	Tnfsf10	1.047013888	1.534203703	2402	2880	0.167	0.26	0.551165717	4.48E-18	1.37E-13	up	TNFSF10
Endothelial_cells	ENSMUSG00000017493	Igfbp4	0.731008211	0.534048843	2402	2880	0.112	0.094	-0.452843142	0.000920057	1	down	IGFBP4
Endothelial_cells	ENSMUSG00000005705	Agrp	0.720209363	0.976927743	2402	2880	0.121	0.176	0.439782871	5.49E-10	1.67E-05	up	AGRP
Endothelial_cells	ENSMUSG00000060802	B2m	7.122492839	10.9927418	2402	2880	0.659	0.785	0.626089964	2.89E-53	8.82E-49	up	B2M
Endothelial_cells	ENSMUSG00000033880	Lgals3bp	0.301129773	0.897880802	2402	2880	0.053	0.167	1.575820233	5.02E-40	1.53E-35	up	LGALS3BP
Endothelial_cells	ENSMUSG00000019899	Lama2	1.750929611	0.760837633	2402	2880	0.149	0.093	-1.20235336	2.42E-18	7.38E-14	down	LAMA2
Endothelial_cells	ENSMUSG00000059327	Eda	1.425250553	0.70868448	2402	2880	0.148	0.082	-1.007897862	5.95E-15	1.81E-10	down	EDA
Endothelial_cells	ENSMUSG00000003617	Cp	1.068168907	0.584166996	2402	2880	0.149	0.099	-0.870575151	7.38E-11	2.25E-06	down	CP
Endothelial_cells	ENSMUSG00000017466	Timp2	1.271104395	0.780894837	2402	2880	0.183	0.142	-0.702811101	1.23E-14	3.76E-10	down	TIMP2
Endothelial_cells	ENSMUSG00000052911	Lamb2	1.230727484	0.897697502	2402	2880	0.206	0.172	-0.455166576	6.77E-11	2.06E-06	down	LAMB2
Endothelial_cells	ENSMUSG00000025499	Hras	0.608846571	0.457378052	2402	2880	0.111	0.097	-0.412613122	9.56E-07	0.029124631	down	HRAS
Endothelial_cells	ENSMUSG00000031375	Bgn	1.359261454	1.05564543	2402	2880	0.172	0.164	-0.364667118	2.38E-07	0.007247856	down	BGN
Endothelial_cells	ENSMUSG00000046743	Fat4	1.147079031	1.502170123	2402	2880	0.181	0.248	0.389053688	2.67E-10	8.15E-06	up	FAT4
Endothelial_cells	ENSMUSG00000030403	Vasp	0.432726747	0.569978418	2402	2880	0.078	0.122	0.397370732	1.13E-11	3.44E-07	up	VASP
Endothelial_cells	ENSMUSG00000022912	Pros1	0.997925852	1.320322182	2402	2880	0.164	0.226	0.403850188	1.48E-09	4.50E-05	up	PROS1
Endothelial_cells	ENSMUSG00000000489	Pdgfb	2.131828273	2.897425649	2402	2880	0.296	0.424	0.442662531	4.42E-23	1.35E-18	up	PDGFB
Endothelial_cells	ENSMUSG00000019647	Sema6a	5.288017952	7.637433214	2402	2880	0.54	0.644	0.530352392	3.62E-20	1.10E-15	up	SEMA6A
Endothelial_cells	ENSMUSG00000031712	Il15	0.812514406	1.186798075	2402	2880	0.135	0.205	0.546553203	2.23E-12	6.80E-08	up	IL15
Endothelial_cells	ENSMUSG00000031538	Plat	0.401155596	0.605516309	2402	2880	0.066	0.111	0.593882542	7.99E-10	2.43E-05	up	PLAT
Endothelial_cells	ENSMUSG00000032006	Pdgfd	9.894260402	14.94054634	2402	2880	0.659	0.724	0.594564205	6.62E-27	2.02E-22	up	PDGFD
Endothelial_cells	ENSMUSG00000025006	Sorbs1	4.881109173	7.636530177	2402	2880	0.539	0.668	0.645697583	7.45E-32	2.27E-27	up	SORBS1
Endothelial_cells	ENSMUSG00000031217	Efnb1	0.690387674	1.157399201	2402	2880	0.114	0.207	0.745323632	3.38E-20	1.03E-15	up	EFNB1
Endothelial_cells	ENSMUSG00000029417	Cxcl9	0.320862057	0.707260093	2402	2880	0.051	0.114	1.140042072	1.94E-16	5.92E-12	up	CXCL9
Epicardial_cells	ENSMUSG00000029019	Nppb	2.2238731	0.596435565	481	309	0.264	0.1	-1.898459279	7.66E-09	0.000233598	down	NPPB
Epicardial_cells	ENSMUSG00000002985	Apoe	8.9974414	5.404407493	481	309	0.609	0.495	-0.735367683	1.34E-05	0.409428009	down	APOE
Epicardial_cells	ENSMUSG00000041616	Nppa	14.79129205	2.333379747	481	309	0.73	0.32	-2.664202983	1.14E-35	3.47E-31	down	NPPA
Epicardial_cells	ENSMUSG00000048915	Efna5	13.85263598	18.41456057	481	309	0.805	0.835	0.410683862	0.000842628	1	up	EFNA5
Epicardial_cells	ENSMUSG00000031274	Col4a5	1.784488358	2.870083778	481	309	0.316	0.476	0.685551782	3.94E-05	1	up	COL4A5
Epicardial_cells	ENSMUSG00000048482	Bdnf	0.413310095	0.745837377	481	309	0.081	0.142	0.851480899	0.024855491	1	up	BDNF
Epicardial_cells	ENSMUSG00000056427	Slit3	19.88443824	29.33313483	481	309	0.861	0.848	0.560889118	2.10E-07	0.006406192	up	SLIT3
Epicardial_cells	ENSMUSG00000015568	Lpl	6.187120536	2.916582878	481	309	0.572	0.434	-1.084962923	1.31E-10	4.00E-06	down	LPL
Epicardial_cells	ENSMUSG00000021270	Hsp90aa1	1.571722071	1.12863633	481	309	0.272	0.223	-0.477729399	0.007928499	1	down	HSP90AA1
Epicardial_cells	ENSMUSG00000024962	Vegfb	0.970479906	0.513953735	481	309	0.191	0.107	-0.916927818	0.002602327	1	down	VEGFB
Epicardial_cells	ENSMUSG00000026043	Col3a1	15.53598832	21.03244151	481	309	0.815	0.874	0.436999884	0.000977715	1	up	COL3A1
Epicardial_cells	ENSMUSG00000033880	Lgals3bp	0.449067243	0.918001054	481	309	0.087	0.178	1.031400238	0.000851868	1	up	LGALS3BP
Epicardial_cells	ENSMUSG00000032006	Pdgfd	5.375597026	7.049607956	481	309	0.561	0.641	0.391111663	0.005808251	1	up	PDGFD
Epicardial_cells	ENSMUSG00000025006	Sorbs1	3.33883048	4.344709167	481	309	0.472	0.586	0.379906757	0.006801735	1	up	SORBS1
Epicardial_cells	ENSMUSG00000023885	Thbs2	0.724828371	0.389243482	481	309	0.125	0.1	-0.896794976	0.004095278	1	down	THBS2
Epicardial_cells	ENSMUSG00000002900	Lamb1	0.80465182	0.454975521	481	309	0.146	0.097	-0.822437951	0.042273688	1	down	LAMB1
Epicardial_cells	ENSMUSG00000018920	Cxcl16	0.537966553	0.344397747	481	309	0.11	0.091	-0.64329008	0.03124726	1	down	CXCL16
Epicardial_cells	ENSMUSG00000029103	Lrpap1	1.470858825	0.947178109	481	309	0.258	0.201	-0.634896913	0.003301689	1	down	LRPAP1
Epicardial_cells	ENSMUSG00000020572	Nampt	0.730985117	0.514811017	481	309	0.125	0.136	-0.505716244	0.000723357	1	down	NAMPT
Epicardial_cells	ENSMUSG00000009281	Rarres2	24.39233658	18.40589606	481	309	0.865	0.825	-0.406258052	0.000108274	1	down	RARRES2
Epicardial_cells	ENSMUSG00000027204	Fbn1	1.488174252	1.915089725	481	309	0.26	0.343	0.363846913	0.015803611	1	up	FBN1
Epicardial_cells	ENSMUSG00000001435	Col18a1	0.494367641	0.655280572	481	309	0.096	0.146	0.406456796	0.02442056	1	up	COL18A1
Epicardial_cells	ENSMUSG00000017754	Pltp	0.72590624	1.005549954	481	309	0.135	0.204	0.470074367	0.017283446	1	up	PLTP
Epicardial_cells	ENSMUSG00000014599	Csf1	2.065255846	2.971040438	481	309	0.341	0.453	0.52462643	0.006901693	1	up	CSF1
Epicardial_cells	ENSMUSG00000026399	Cd55	0.446984116	0.643272475	481	309	0.085	0.152	0.525107924	0.001033209	1	up	CD55
Epicardial_cells	ENSMUSG00000020467	Efemp1	10.7085263	15.78564229	481	309	0.786	0.906	0.559848679	8.29E-10	2.53E-05	up	EFEMP1
Epicardial_cells	ENSMUSG00000079465	Col4a3	1.330614285	2.066057235	481	309	0.227	0.34	0.634749201	0.002023997	1	up	COL4A3
Epicardial_cells	ENSMUSG00000035513	Ntng2	0.476501812	0.755702159	481	309	0.094	0.168	0.665224204	0.006424852	1	up	NTNG2
Epicardial_cells	ENSMUSG00000028780	Sema3c	5.829274298	9.248480428	481	309	0.588	0.722	0.665890904	3.38E-06	0.103104233	up	SEMA3C
Epicardial_cells	ENSMUSG00000040254	Sema3d	6.047083212	9.815852782	481	309	0.626	0.754	0.69886502	7.55E-08	0.002300273	up	SEMA3D
Epicardial_cells	ENSMUSG00000028883	Sema3a	0.296016038	0.499295526	481	309	0.062	0.113	0.754020264	0.034258564	1	up	SEMA3A
Epicardial_cells	ENSMUSG00000020019	Ntn4	0.310717541	0.524598235	481	309	0.067	0.117	0.755420013	0.04489546	1	up	NTN4
Epicardial_cells	ENSMUSG00000029999	Tgfa	0.593874662	1.013053274	481	309	0.123	0.223	0.770379154	0.000569535	1	up	TGFA
Epicardial_cells	ENSMUSG00000068876	Cgn	0.464120747	0.82408413	481	309	0.1	0.162	0.828155682	0.034429362	1	up	CGN
Epicardial_cells	ENSMUSG00000021835	Bmp4	0.318336028	0.580096955	481	309	0.071	0.133	0.86553915	0.014826244	1	up	BMP4
Epicardial_cells	ENSMUSG00000070509	Rgma	0.476973207	0.950674868	481	309	0.104	0.217	0.994893104	4.64E-05	1	up	RGMA
Epicardial_cells	ENSMUSG00000031273	Col4a6	0.968218218	1.961303168	481	309	0.17	0.317	1.018332971	1.24E-05	0.377935741	up	COL4A6
Epicardial_cells	ENSMUSG00000073418	C4b	1.880246682	4.309178375	481	309	0.218	0.382	1.196447621	1.09E-06	0.033122427	up	C4B
Fibroblasts	ENSMUSG00000029019	Nppb	1.694334738	0.487997539	3428	2988	0.225	0.091	-1.795562689	8.25E-61	2.51E-56	down	NPPB
Fibroblasts	ENSMUSG00000002985	Apoe	31.96973552	16.22313259	3428	2988	0.788	0.685	-0.978650006	2.50E-84	7.63E-80	down	APOE
Fibroblasts	ENSMUSG00000041616	Nppa	10.58167327	2.103441956	3428	2988	0.687	0.308	-2.330688913	2.73E-265	8.33E-261	down	NPPA
Fibroblasts	ENSMUSG00000031274	Col4a5	1.586208209	2.413478311	3428	2988	0.243	0.363	0.605500534	1.35E-25	4.11E-21	up	COL4A5
Fibroblasts	ENSMUSG00000015568	Lpl	11.26909278	8.009967581	3428	2988	0.784	0.726	-0.492497858	2.11E-46	6.43E-42	down	LPL
Fibroblasts	ENSMUSG00000021270	Hsp90aa1	1.34532076	0.858274609	3428	2988	0.23	0.184	-0.648378118	9.15E-26	2.79E-21	down	HSP90AA1
Fibroblasts	ENSMUSG00000024962	Vegfb	1.100105224	0.682875268	3428	2988	0.194	0.147	-0.687867418	9.15E-24	2.79E-19	down	VEGFB
Fibroblasts	ENSMUSG00000037405	Icam1	0.296252585	0.472229592	3428	2988	0.059	0.107	0.672479286	8.93E-15	2.72E-10	up	ICAM1
Fibroblasts	ENSMUSG00000033880	Lgals3bp	0.496956687	1.337385507	3428	2988	0.097	0.265	1.42804096	4.26E-71	1.30E-66	up	LGALS3BP
Fibroblasts	ENSMUSG00000019899	Lama2	19.77913942	26.0803788	3428	2988	0.917	0.935	0.398983405	6.53E-56	1.99E-51	up	LAMA2
Fibroblasts	ENSMUSG00000052911	Lamb2	2.471761923	1.882919505	3428	2988	0.362	0.33	-0.392550213	2.00E-19	6.09E-15	down	LAMB2
Fibroblasts	ENSMUSG00000019647	Sema6a	0.96372919	1.297071944	3428	2988	0.158	0.244	0.428520327	1.89E-25	5.77E-21	up	SEMA6A
Fibroblasts	ENSMUSG00000031712	Il15	0.50837076	0.729279827	3428	2988	0.096	0.154	0.520505484	2.19E-15	6.67E-11	up	IL15
Fibroblasts	ENSMUSG00000017754	Pltp	0.75338608	1.136449375	3428	2988	0.14	0.231	0.593007596	2.27E-25	6.93E-21	up	PLTP
Fibroblasts	ENSMUSG00000028780	Sema3c	0.977973259	1.308689766	3428	2988	0.124	0.165	0.420218938	5.50E-06	0.167571672	up	SEMA3C
Fibroblasts	ENSMUSG00000021835	Bmp4	0.570890167	0.912108848	3428	2988	0.103	0.186	0.675898261	4.00E-26	1.22E-21	up	BMP4
Fibroblasts	ENSMUSG00000070509	Rgma	0.910515515	1.261312155	3428	2988	0.168	0.259	0.470125795	1.90E-25	5.78E-21	up	RGMA
Fibroblasts	ENSMUSG00000031273	Col4a6	0.573638583	0.74645119	3428	2988	0.089	0.125	0.379847647	7.10E-08	0.002163628	up	COL4A6
Fibroblasts	ENSMUSG00000073418	C4b	0.711342149	1.028891847	3428	2988	0.095	0.145	0.532413197	1.40E-10	4.26E-06	up	C4B
Fibroblasts	ENSMUSG00000025723	Nmb	1.161135154	0.611170724	3428	2988	0.17	0.116	-0.925776775	3.00E-23	9.15E-19	down	NMB
Fibroblasts	ENSMUSG00000020044	Timp3	5.286820164	3.724070891	3428	2988	0.536	0.459	-0.505508266	5.88E-27	1.79E-22	down	TIMP3
Fibroblasts	ENSMUSG00000045573	Penk	1.997504921	1.472236955	3428	2988	0.268	0.24	-0.440163399	5.42E-14	1.65E-09	down	PENK
Fibroblasts	ENSMUSG00000020676	Ccl11	1.185819131	0.89768712	3428	2988	0.122	0.114	-0.401560331	1.90E-06	0.057872906	down	CCL11
Fibroblasts	ENSMUSG00000020681	Ace	2.231736807	1.709848036	3428	2988	0.342	0.31	-0.384279057	1.01E-20	3.09E-16	down	ACE
Fibroblasts	ENSMUSG00000049107	Ntf3	0.442339585	0.568646384	3428	2988	0.081	0.117	0.362305001	4.29E-11	1.31E-06	up	NTF3
Fibroblasts	ENSMUSG00000028549	Itgb3bp	0.637711507	0.829144788	3428	2988	0.106	0.163	0.378667914	1.86E-18	5.68E-14	up	ITGB3BP
Fibroblasts	ENSMUSG00000001741	Il16	0.367787069	0.485561815	3428	2988	0.066	0.105	0.400689092	8.65E-15	2.64E-10	up	IL16
Fibroblasts	ENSMUSG00000031740	Mmp2	4.542322431	6.122911476	3428	2988	0.549	0.658	0.430779509	9.46E-20	2.88E-15	up	MMP2
Fibroblasts	ENSMUSG00000031520	Vegfc	0.776688535	1.122933459	3428	2988	0.134	0.213	0.531807098	1.40E-20	4.26E-16	up	VEGFC
Fibroblasts	ENSMUSG00000026193	Fn1	0.695308106	1.373857704	3428	2988	0.099	0.163	0.982405804	3.56E-13	1.09E-08	up	FN1
Lymphatic_ECs	ENSMUSG00000029019	Nppb	1.341313805	0.858710695	180	128	0.233	0.086	-0.643342292	0.002189631	1	down	NPPB
Lymphatic_ECs	ENSMUSG00000041616	Nppa	10.76732224	4.876216157	180	128	0.706	0.414	-1.142809333	1.07E-07	0.003271911	down	NPPA
Lymphatic_ECs	ENSMUSG00000015568	Lpl	5.717210289	3.05868314	180	128	0.55	0.359	-0.902378763	0.00025231	1	down	LPL
Lymphatic_ECs	ENSMUSG00000037820	Tgm2	2.244018679	3.70803125	180	128	0.389	0.547	0.724543335	0.014837332	1	up	TGM2
Lymphatic_ECs	ENSMUSG00000060802	B2m	5.046069689	7.154607946	180	128	0.583	0.734	0.503704157	0.01291865	1	up	B2M
Lymphatic_ECs	ENSMUSG00000033880	Lgals3bp	0.243086393	0.724095891	180	128	0.044	0.141	1.574317486	0.01013744	1	up	LGALS3BP
Lymphatic_ECs	ENSMUSG00000028883	Sema3a	3.468432275	6.195111497	180	128	0.406	0.609	0.836828226	0.000960701	1	up	SEMA3A
Lymphatic_ECs	ENSMUSG00000029623	Pdap1	0.627690715	0.270890372	180	128	0.111	0.086	-1.212042099	0.042237806	1	down	PDAP1
Lymphatic_ECs	ENSMUSG00000066551	Hmgb1	3.575891472	2.445686095	180	128	0.544	0.391	-0.548045063	0.004742313	1	down	HMGB1
Lymphatic_ECs	ENSMUSG00000032562	Gnai2	2.144069444	3.0180462	180	128	0.333	0.531	0.493243772	0.000466835	1	up	GNAI2
Lymphatic_ECs	ENSMUSG00000031196	F8	0.80420397	1.790414932	180	128	0.15	0.297	1.154561803	0.007620761	1	up	F8
Lymphatic_ECs	ENSMUSG00000048027	Rgmb	0.133603869	0.347503915	180	128	0.033	0.102	1.378403121	0.04414473	1	up	RGMB
Mono_Macro	ENSMUSG00000029019	Nppb	2.379198071	0.483573129	1393	1420	0.272	0.082	-2.298431726	8.06E-45	2.46E-40	down	NPPB
Mono_Macro	ENSMUSG00000041616	Nppa	12.72069167	3.220900007	1393	1420	0.695	0.306	-1.98160789	4.31E-113	1.31E-108	down	NPPA
Mono_Macro	ENSMUSG00000024164	C3	1.632842646	0.729883786	1393	1420	0.166	0.112	-1.161537795	1.92E-09	5.84E-05	down	C3
Mono_Macro	ENSMUSG00000019929	Dcn	6.176142458	3.69642217	1393	1420	0.376	0.36	-0.740560823	4.47E-10	1.36E-05	down	DCN
Mono_Macro	ENSMUSG00000023224	Serping1	0.951372928	0.498025921	1393	1420	0.118	0.083	-0.933652122	1.35E-05	0.410663002	down	SERPING1
Mono_Macro	ENSMUSG00000005397	Nid1	0.755731272	0.516720642	1393	1420	0.113	0.089	-0.548400516	0.006933766	1	down	NID1
Mono_Macro	ENSMUSG00000064080	Fbln2	0.774567592	0.455551995	1393	1420	0.101	0.081	-0.765645001	0.001137586	1	down	FBLN2
Mono_Macro	ENSMUSG00000015568	Lpl	6.98893317	3.924735603	1393	1420	0.596	0.459	-0.832460668	2.61E-27	7.96E-23	down	LPL
Mono_Macro	ENSMUSG00000021270	Hsp90aa1	1.065879544	0.74562314	1393	1420	0.183	0.143	-0.515467739	3.07E-05	0.934896497	down	HSP90AA1
Mono_Macro	ENSMUSG00000024962	Vegfb	1.146002272	0.734872891	1393	1420	0.19	0.14	-0.640972845	8.51E-07	0.025945433	down	VEGFB
Mono_Macro	ENSMUSG00000002603	Tgfb1	1.104364411	1.437654197	1393	1420	0.197	0.248	0.380470117	0.002929385	1	up	TGFB1
Mono_Macro	ENSMUSG00000033880	Lgals3bp	0.530568364	1.190897214	1393	1420	0.098	0.222	1.166287588	7.24E-19	2.21E-14	up	LGALS3BP
Mono_Macro	ENSMUSG00000017466	Timp2	6.476178916	4.729403469	1393	1420	0.617	0.536	-0.453476391	2.53E-12	7.72E-08	down	TIMP2
Mono_Macro	ENSMUSG00000052911	Lamb2	0.551327019	0.311755295	1393	1420	0.101	0.057	-0.822293203	5.57E-05	1	down	LAMB2
Mono_Macro	ENSMUSG00000019647	Sema6a	0.923734284	0.552351563	1393	1420	0.14	0.092	-0.741786106	5.68E-05	1	down	SEMA6A
Mono_Macro	ENSMUSG00000031712	Il15	1.271985713	2.340430076	1393	1420	0.211	0.363	0.879639422	3.47E-18	1.06E-13	up	IL15
Mono_Macro	ENSMUSG00000025006	Sorbs1	1.112450337	0.769023143	1393	1420	0.166	0.126	-0.532584103	0.000708509	1	down	SORBS1
Mono_Macro	ENSMUSG00000020572	Nampt	0.639822739	0.919126165	1393	1420	0.119	0.17	0.522522131	0.000184419	1	up	NAMPT
Mono_Macro	ENSMUSG00000073418	C4b	1.420093861	1.906281298	1393	1420	0.176	0.245	0.424748829	2.20E-05	0.671227294	up	C4B
Mono_Macro	ENSMUSG00000020044	Timp3	0.941678188	0.570580134	1393	1420	0.148	0.109	-0.722704969	6.18E-06	0.188333292	down	TIMP3
Mono_Macro	ENSMUSG00000017737	Mmp9	0.83779142	0.102688782	1393	1420	0.104	0.021	-3.027080484	4.82E-23	1.47E-18	down	MMP9
Mono_Macro	ENSMUSG00000004814	Ccl24	2.235228993	1.074802662	1393	1420	0.247	0.162	-1.056281158	8.09E-13	2.47E-08	down	CCL24
Mono_Macro	ENSMUSG00000061353	Cxcl12	0.719472248	0.430548553	1393	1420	0.111	0.068	-0.740628563	0.000240231	1	down	CXCL12
Mono_Macro	ENSMUSG00000029373	Pf4	12.46467596	7.648657182	1393	1420	0.71	0.572	-0.704559699	1.04E-22	3.17E-18	down	PF4
Mono_Macro	ENSMUSG00000034488	Edil3	0.750926478	0.508671299	1393	1420	0.108	0.073	-0.561846484	0.00390934	1	down	EDIL3
Mono_Macro	ENSMUSG00000036905	C1qb	27.34155888	18.84602463	1393	1420	0.883	0.787	-0.536832888	8.53E-22	2.60E-17	down	C1QB
Mono_Macro	ENSMUSG00000036887	C1qa	31.78257927	22.47885507	1393	1420	0.906	0.8	-0.499665775	7.38E-27	2.25E-22	down	C1QA
Mono_Macro	ENSMUSG00000027962	Vcam1	0.754998847	0.553657947	1393	1420	0.108	0.076	-0.447410017	0.002072355	1	down	VCAM1
Mono_Macro	ENSMUSG00000039217	Il18	0.374548028	0.535573782	1393	1420	0.07	0.115	0.515818831	2.27E-06	0.069114352	up	IL18
Mono_Macro	ENSMUSG00000021423	Ly86	3.177546939	4.811059165	1393	1420	0.418	0.532	0.598425689	2.13E-10	6.49E-06	up	LY86
Mono_Macro	ENSMUSG00000060275	Nrg2	0.493125139	1.001732324	1393	1420	0.075	0.154	1.022322826	6.69E-11	2.04E-06	up	NRG2
Mono_Macro	ENSMUSG00000028019	Pdgfc	1.167643761	2.385645735	1393	1420	0.169	0.276	1.030716556	1.62E-12	4.93E-08	up	PDGFC
pericytes	ENSMUSG00000029019	Nppb	2.610833898	0.54202663	428	815	0.273	0.083	-2.267864153	1.21E-19	3.69E-15	down	NPPB
pericytes	ENSMUSG00000002985	Apoe	2.876637572	2.229669823	428	815	0.301	0.242	-0.367538829	0.027972817	1	down	APOE
pericytes	ENSMUSG00000020053	Igf1	0.443165345	0.572716769	428	815	0.068	0.101	0.369903151	0.035670047	1	up	IGF1
pericytes	ENSMUSG00000041616	Nppa	9.212481047	2.767342691	428	815	0.643	0.313	-1.735051965	1.81E-39	5.51E-35	down	NPPA
pericytes	ENSMUSG00000005397	Nid1	2.942368448	3.843028836	428	815	0.395	0.525	0.385254396	3.37E-05	1	up	NID1
pericytes	ENSMUSG00000041936	Agrn	0.434467716	0.666702448	428	815	0.072	0.119	0.617678401	0.015807629	1	up	AGRN
pericytes	ENSMUSG00000015568	Lpl	8.088229023	3.49619063	428	815	0.575	0.416	-1.210016571	8.83E-23	2.69E-18	down	LPL
pericytes	ENSMUSG00000021270	Hsp90aa1	1.521592621	1.061671291	428	815	0.234	0.175	-0.519203928	0.002691289	1	down	HSP90AA1
pericytes	ENSMUSG00000024962	Vegfb	1.419578817	0.799476199	428	815	0.206	0.128	-0.828257143	0.000267572	1	down	VEGFB
pericytes	ENSMUSG00000026043	Col3a1	3.513310305	5.504508465	428	815	0.397	0.572	0.647767883	2.91E-08	0.000887035	up	COL3A1
pericytes	ENSMUSG00000005705	Agrp	0.452412985	0.819714331	428	815	0.075	0.139	0.857338019	0.002065306	1	up	AGRP
pericytes	ENSMUSG00000060802	B2m	1.984916489	2.610512045	428	815	0.262	0.364	0.395237088	0.000167074	1	up	B2M
pericytes	ENSMUSG00000033880	Lgals3bp	0.237954657	0.765394826	428	815	0.035	0.131	1.685099775	1.17E-08	0.000357657	up	LGALS3BP
pericytes	ENSMUSG00000025499	Hras	0.762410295	0.266215992	428	815	0.124	0.052	-1.517617755	2.34E-06	0.07131155	down	HRAS
pericytes	ENSMUSG00000031375	Bgn	2.639103022	3.544624907	428	815	0.325	0.448	0.425571335	6.50E-05	1	up	BGN
pericytes	ENSMUSG00000031538	Plat	0.913826334	1.352389687	428	815	0.14	0.226	0.565467805	0.000213296	1	up	PLAT
pericytes	ENSMUSG00000002900	Lamb1	1.252866148	1.676110527	428	815	0.178	0.272	0.419855921	3.18E-05	0.969081712	up	LAMB1
pericytes	ENSMUSG00000029103	Lrpap1	0.959139438	0.703751848	428	815	0.152	0.129	-0.446619183	0.042312537	1	down	LRPAP1
pericytes	ENSMUSG00000020572	Nampt	1.003375396	0.647446373	428	815	0.154	0.12	-0.631949825	0.00059658	1	down	NAMPT
pericytes	ENSMUSG00000009281	Rarres2	2.372673985	3.446486301	428	815	0.315	0.442	0.538593455	6.16E-05	1	up	RARRES2
pericytes	ENSMUSG00000017754	Pltp	0.316657334	0.964134871	428	815	0.056	0.175	1.60600658	2.41E-09	7.34E-05	up	PLTP
pericytes	ENSMUSG00000028549	Itgb3bp	0.655719302	0.890722581	428	815	0.086	0.137	0.441839766	0.00374193	1	up	ITGB3BP
pericytes	ENSMUSG00000026193	Fn1	1.430046958	2.691946963	428	815	0.201	0.347	0.912540176	2.75E-07	0.008376613	up	FN1
pericytes	ENSMUSG00000068196	Col8a1	0.979773655	0.357266376	428	815	0.119	0.055	-1.455191839	0.000103765	1	down	COL8A1
pericytes	ENSMUSG00000040952	Rps19	2.894889845	2.180783413	428	815	0.381	0.313	-0.40864564	0.001579246	1	down	RPS19
pericytes	ENSMUSG00000026728	Vim	1.848683312	2.409254719	428	815	0.255	0.345	0.382070669	0.001917449	1	up	VIM
pericytes	ENSMUSG00000027082	Tfpi	0.723971961	0.94440419	428	815	0.114	0.169	0.383424111	0.002664051	1	up	TFPI
pericytes	ENSMUSG00000027276	Jag1	1.680494336	2.222297024	428	815	0.224	0.337	0.403145046	3.20E-06	0.097450549	up	JAG1
pericytes	ENSMUSG00000004098	Col5a3	3.463531463	4.745816277	428	815	0.395	0.514	0.454401217	0.000315162	1	up	COL5A3
pericytes	ENSMUSG00000026249	Serpine2	0.697286309	0.991708092	428	815	0.112	0.167	0.508102955	0.018631311	1	up	SERPINE2
pericytes	ENSMUSG00000026837	Col5a1	0.478791203	0.93257786	428	815	0.079	0.169	0.961680937	7.16E-06	0.218170833	up	COL5A1
pericytes	ENSMUSG00000017446	C1qtnf1	0.429690939	0.982170293	428	815	0.072	0.171	1.192485001	2.41E-06	0.073338722	up	C1QTNF1
Schwann_cells	ENSMUSG00000029019	Nppb	3.520330544	0.920197225	43	24	0.442	0.167	-1.935580096	0.045559016	1	down	NPPB
Schwann_cells	ENSMUSG00000041616	Nppa	7.112571536	2.792497305	43	24	0.767	0.375	-1.348783991	0.004464678	1	down	NPPA
Schwann_cells	ENSMUSG00000022309	Angpt1	0.940153436	0	43	24	0.14	0	-13.19883396	0.027270863	1	down	ANGPT1
Schwann_cells	ENSMUSG00000015568	Lpl	10.50499524	3.498325662	43	24	0.744	0.417	-1.5863115	0.013386911	1	down	LPL
Schwann_cells	ENSMUSG00000024962	Vegfb	1.311125187	0.552952632	43	24	0.326	0.083	-1.245426784	0.043124715	1	down	VEGFB
Schwann_cells	ENSMUSG00000001930	Vwf	0.519538884	0	43	24	0.116	0	-12.34329367	0.047396337	1	down	VWF
Schwann_cells	ENSMUSG00000026043	Col3a1	8.530147343	20.55818715	43	24	0.581	0.792	1.269060589	0.036181662	1	up	COL3A1
Schwann_cells	ENSMUSG00000060802	B2m	5.019513394	12.24966894	43	24	0.628	0.792	1.287106378	0.005235506	1	up	B2M
Schwann_cells	ENSMUSG00000019647	Sema6a	1.209079119	0	43	24	0.14	0	-13.56174035	0.027270863	1	down	SEMA6A
Schwann_cells	ENSMUSG00000029999	Tgfa	0	0.436371383	43	24	0	0.125	12.09167135	0.019016199	1	up	TGFA
Schwann_cells	ENSMUSG00000029623	Pdap1	1.213681049	0	43	24	0.209	0	-13.56722058	0.005054603	1	down	PDAP1
Schwann_cells	ENSMUSG00000039109	F13a1	3.188862377	0	43	24	0.186	0	-14.96079946	0.008923377	1	down	F13A1
Schwann_cells	ENSMUSG00000001870	Ltbp1	1.061358104	0	43	24	0.186	0	-13.37375981	0.008923377	1	down	LTBP1
Schwann_cells	ENSMUSG00000029661	Col1a2	2.292333928	6.492255499	43	24	0.302	0.667	1.501861846	0.010119393	1	up	COL1A2
Schwann_cells	ENSMUSG00000022371	Col14a1	0.185292125	2.097791808	43	24	0.047	0.375	3.500288412	0.002613532	1	up	COL14A1
Schwann_cells	ENSMUSG00000001131	Timp1	0	0.458454139	43	24	0	0.125	12.16287636	0.019016199	1	up	TIMP1
Schwann_cells	ENSMUSG00000041670	Rims1	0	0.477469996	43	24	0	0.125	12.22149649	0.019016199	1	up	RIMS1
Schwann_cells	ENSMUSG00000024145	Pigf	0	1.233227427	43	24	0	0.167	13.59026824	0.005580438	1	up	PIGF
Smooth_moscle_cells	ENSMUSG00000029019	Nppb	1.420659118	0.491073142	83	100	0.217	0.1	-1.532358396	0.039035508	1	down	NPPB
Smooth_moscle_cells	ENSMUSG00000041616	Nppa	9.470141409	2.689507248	83	100	0.747	0.33	-1.816005685	4.15E-09	0.000126515	down	NPPA
Smooth_moscle_cells	ENSMUSG00000019929	Dcn	10.49935245	3.274209564	83	100	0.446	0.36	-1.681051462	0.016735319	1	down	DCN
Smooth_moscle_cells	ENSMUSG00000022309	Angpt1	0.163979492	0.807834927	83	100	0.036	0.14	2.299844174	0.040384198	1	up	ANGPT1
Smooth_moscle_cells	ENSMUSG00000036585	Fgf1	1.133275624	2.694531996	83	100	0.217	0.36	1.24946218	0.035957446	1	up	FGF1
Smooth_moscle_cells	ENSMUSG00000015568	Lpl	7.935400607	3.688908352	83	100	0.578	0.46	-1.105088182	0.003770685	1	down	LPL
Smooth_moscle_cells	ENSMUSG00000001494	Sost	0.155542393	1.99751178	83	100	0.036	0.17	3.681969264	0.003782361	1	up	SOST
Smooth_moscle_cells	ENSMUSG00000031375	Bgn	2.627078449	9.885890075	83	100	0.398	0.59	1.91187126	0.000599859	1	up	BGN
Smooth_moscle_cells	ENSMUSG00000032006	Pdgfd	4.451645445	7.742945686	83	100	0.494	0.52	0.798530054	0.011825518	1	up	PDGFD
Smooth_moscle_cells	ENSMUSG00000020019	Ntn4	3.172823016	1.978521259	83	100	0.422	0.23	-0.681317035	0.021025681	1	down	NTN4
Smooth_moscle_cells	ENSMUSG00000026728	Vim	4.413157216	12.31610842	83	100	0.518	0.56	1.480642447	0.010206195	1	up	VIM
Smooth_moscle_cells	ENSMUSG00000001029	Icam2	1.127675519	0.274227499	83	100	0.169	0.07	-2.039508778	0.025644552	1	down	ICAM2
Smooth_moscle_cells	ENSMUSG00000031503	Col4a2	3.301359922	2.15862922	83	100	0.434	0.36	-0.612921842	0.049532848	1	down	COL4A2
Smooth_moscle_cells	ENSMUSG00000040998	Npnt	1.084981579	2.52430711	83	100	0.133	0.23	1.21814108	0.049898701	1	up	NPNT
Smooth_moscle_cells	ENSMUSG00000031750	Il34	0.310029351	1.090858198	83	100	0.036	0.19	1.814653846	0.002484856	1	up	IL34
T_cell	ENSMUSG00000002985	Apoe	6.958030779	1.878668735	77	67	0.416	0.254	-1.888912304	0.014860732	1	down	APOE
T_cell	ENSMUSG00000041616	Nppa	6.981345352	2.658170575	77	67	0.675	0.358	-1.393037787	0.000141655	1	down	NPPA
T_cell	ENSMUSG00000019929	Dcn	11.6243558	4.334425559	77	67	0.442	0.448	-1.423217182	0.012869299	1	down	DCN
T_cell	ENSMUSG00000022309	Angpt1	0.60042161	0.342477341	77	67	0.13	0.03	-0.809786431	0.009741874	1	down	ANGPT1
T_cell	ENSMUSG00000015568	Lpl	7.742338764	2.977459062	77	67	0.623	0.388	-1.378657942	0.001796806	1	down	LPL
T_cell	ENSMUSG00000039004	Bmp6	0.868298824	0.072426393	77	67	0.13	0.03	-3.581779757	0.023220052	1	down	BMP6
T_cell	ENSMUSG00000028763	Hspg2	0.844439004	0.39411654	77	67	0.182	0.06	-1.099175745	0.031041256	1	down	HSPG2
T_cell	ENSMUSG00000039304	Tnfsf10	0.242601199	1.001462951	77	67	0.052	0.179	2.044999962	0.048802955	1	up	TNFSF10
T_cell	ENSMUSG00000019899	Lama2	1.987925329	0.337943109	77	67	0.208	0.045	-2.556056996	0.008834364	1	down	LAMA2
T_cell	ENSMUSG00000061353	Cxcl12	0.756250809	0.161472247	77	67	0.156	0.03	-2.226876127	0.027365223	1	down	CXCL12
T_cell	ENSMUSG00000028064	Sema4a	0.784236205	1.862462867	77	67	0.156	0.328	1.24774502	0.041396555	1	up	SEMA4A
T_cell	ENSMUSG00000031391	L1cam	0.107347168	0.751049271	77	67	0.026	0.164	2.80547218	0.011728168	1	up	L1CAM
