# Supplementary material for: Single-cell RNA-seq of heart reveals intercellular communication drivers of myocardial fibrosis in diabetic cardiomyopathy
Source: eLife. 2023 Apr 3;12:e80479. doi: 10.7554/eLife.80479 (PMC10110238; doi:10.7554/eLife.80479)
Supplement: Supplementary file 12. [file elife-80479-supp12.xls]

Supplementary file 12: Significantly differentially-expressed receptors in each cell population
Cluster	GeneID	GeneName	Control	T2DM	cells_1	cells_2	pct_1	pct_2	log2FC	p_value	p_val_adjust	significance	Name
Adipocytes	ENSMUSG00000055254	Ntrk2	2.417982464	3.548974741	25	7	0.36	0.857	0.553579511	0.025211251	1	up	NTRK2
Adipocytes	ENSMUSG00000030201	Lrp6	1.136616684	3.055187353	25	7	0.2	0.714	1.426435353	0.029204817	1	up	LRP6
Adipocytes	ENSMUSG00000054263	Lifr	0.571272504	2.058157833	25	7	0.16	0.714	1.848920201	0.016016019	1	up	LIFR
Adipocytes	ENSMUSG00000038188	Scarf1	0.341687528	1.933383927	25	7	0.08	0.571	2.500031112	0.022583347	1	up	SCARF1
Adipocytes	ENSMUSG00000023206	Il15ra	0.961330468	6.848967038	25	7	0.28	0.714	2.832653053	0.011710765	1	up	IL15RA
Adipocytes	ENSMUSG00000048521	Cxcr6	0.117924528	1.109735918	25	7	0.04	0.429	3.233187778	0.04989482	1	up	CXCR6
Adipocytes	ENSMUSG00000049401	Ogfr	0	0.767305821	25	7	0	0.286	12.90577399	0.018912682	1	up	OGFR
Adipocytes	ENSMUSG00000056962	Jmjd6	0	0.859776436	25	7	0	0.286	13.06991365	0.018912682	1	up	JMJD6
Adipocytes	ENSMUSG00000017009	Sdc4	0	1.10610277	25	7	0	0.286	13.43332824	0.018912682	1	up	SDC4
Adipocytes	ENSMUSG00000030084	Plxna1	0	1.362299631	25	7	0	0.429	13.73386233	0.002551003	1	up	PLXNA1
B_cell	ENSMUSG00000029648	Flt1	2.273574045	0	30	37	0.133	0	-14.47273782	0.015485241	1	down	FLT1
B_cell	ENSMUSG00000033278	Ptprm	1.573728663	0	30	37	0.133	0	-13.94199087	0.015485241	1	down	PTPRM
B_cell	ENSMUSG00000000766	Oprm1	1.380800012	0	30	37	0.167	0	-13.75332124	0.005864602	1	down	OPRM1
B_cell	ENSMUSG00000001240	Ramp2	0.995322833	0	30	37	0.133	0	-13.28109376	0.015485241	1	down	RAMP2
B_cell	ENSMUSG00000038235	F11r	0.951707877	0	30	37	0.167	0	-13.21645468	0.005864602	1	down	F11R
B_cell	ENSMUSG00000005534	Insr	2.241161845	0.398906076	30	37	0.333	0.054	-2.489828586	0.009616019	1	down	INSR
B_cell	ENSMUSG00000031996	Aplp2	4.252764314	0.827321363	30	37	0.467	0.108	-2.361740715	0.003266176	1	down	APLP2
B_cell	ENSMUSG00000045382	Cxcr4	2.161467978	0.587325601	30	37	0.333	0.081	-1.879600161	0.031594681	1	down	CXCR4
B_cell	ENSMUSG00000046223	Plaur	0.27457441	1.395755937	30	37	0.033	0.243	2.34535564	0.03183673	1	up	PLAUR
B_cell	ENSMUSG00000045092	S1pr1	0.453580349	2.67927572	30	37	0.067	0.351	2.562148823	0.013898668	1	up	S1PR1
B_cell	ENSMUSG00000017652	Cd40	0.177257822	1.625542185	30	37	0.033	0.243	3.196274886	0.037790691	1	up	CD40
B_cell	ENSMUSG00000000532	Acvr1b	0	0.500413142	30	37	0	0.108	12.28919224	0.040687412	1	up	ACVR1B
Cardiomyocytes	ENSMUSG00000030201	Lrp6	0.945514772	1.223598422	2035	1741	0.167	0.262	0.371923575	3.10E-22	9.44E-18	up	LRP6
Cardiomyocytes	ENSMUSG00000038188	Scarf1	0.339725675	0.514612061	2035	1741	0.071	0.144	0.598970732	5.42E-21	1.65E-16	up	SCARF1
Cardiomyocytes	ENSMUSG00000029648	Flt1	1.774829785	0.906217071	2035	1741	0.187	0.088	-0.96967419	9.03E-18	2.75E-13	down	FLT1
Cardiomyocytes	ENSMUSG00000001240	Ramp2	0.893359951	0.389124659	2035	1741	0.128	0.065	-1.198799949	1.05E-12	3.21E-08	down	RAMP2
Cardiomyocytes	ENSMUSG00000004655	Aqp1	1.209757809	0.379233837	2035	1741	0.151	0.057	-1.67329753	7.22E-25	2.20E-20	down	AQP1
Cardiomyocytes	ENSMUSG00000022579	Gpihbp1	0.923914991	0.510262868	2035	1741	0.128	0.069	-0.856392891	1.13E-09	3.44E-05	down	GPIHBP1
Cardiomyocytes	ENSMUSG00000062960	Kdr	0.956417567	0.59425238	2035	1741	0.134	0.076	-0.686472936	4.47E-08	0.001361863	down	KDR
Cardiomyocytes	ENSMUSG00000037706	Cd81	4.70008447	2.941090095	2035	1741	0.533	0.42	-0.676317349	8.73E-36	2.66E-31	down	CD81
Cardiomyocytes	ENSMUSG00000020009	Ifngr1	0.674039408	0.450002119	2035	1741	0.125	0.092	-0.582794606	1.98E-06	0.060471788	down	IFNGR1
Cardiomyocytes	ENSMUSG00000020154	Ptprb	1.194860441	0.810664318	2035	1741	0.149	0.088	-0.559608357	5.47E-08	0.001667759	down	PTPRB
Cardiomyocytes	ENSMUSG00000025351	Cd63	1.97900879	1.348352122	2035	1741	0.297	0.229	-0.55354662	2.98E-15	9.08E-11	down	CD63
Cardiomyocytes	ENSMUSG00000031447	Lamp1	3.259773361	2.288849984	2035	1741	0.436	0.354	-0.510129981	2.08E-21	6.33E-17	down	LAMP1
Cardiomyocytes	ENSMUSG00000035305	Ror1	1.178886031	0.834586568	2035	1741	0.163	0.173	-0.498240164	1.63E-17	4.98E-13	down	ROR1
Cardiomyocytes	ENSMUSG00000022965	Ifngr2	1.162991863	0.825950902	2035	1741	0.186	0.174	-0.493662458	1.10E-15	3.36E-11	down	IFNGR2
Cardiomyocytes	ENSMUSG00000026235	Epha4	1.674805237	1.21916159	2035	1741	0.216	0.221	-0.458071786	3.70E-15	1.13E-10	down	EPHA4
Cardiomyocytes	ENSMUSG00000032518	Rpsa	5.545072289	4.062533987	2035	1741	0.603	0.487	-0.448816891	3.19E-21	9.72E-17	down	RPSA
Cardiomyocytes	ENSMUSG00000040249	Lrp1	0.77407079	0.567498373	2035	1741	0.114	0.087	-0.447781422	0.000920229	1	down	LRP1
Cardiomyocytes	ENSMUSG00000042284	Itga1	0.628546108	0.485786114	2035	1741	0.107	0.089	-0.371629887	0.000102216	1	down	ITGA1
Cardiomyocytes	ENSMUSG00000023830	Igf2r	2.928580498	3.830555345	2035	1741	0.388	0.504	0.387340416	4.12E-13	1.26E-08	up	IGF2R
Cardiomyocytes	ENSMUSG00000029287	Tgfbr3	1.316637902	1.750384986	2035	1741	0.211	0.341	0.410786484	1.38E-27	4.21E-23	up	TGFBR3
Cardiomyocytes	ENSMUSG00000022817	Itgb5	0.699021322	0.945853639	2035	1741	0.127	0.203	0.436226643	3.90E-17	1.19E-12	up	ITGB5
Cardiomyocytes	ENSMUSG00000050199	Lgr4	0.539406691	0.749163786	2035	1741	0.088	0.175	0.473832873	6.24E-23	1.90E-18	up	LGR4
Cardiomyocytes	ENSMUSG00000031616	Ednra	0.951907447	1.350197637	2035	1741	0.143	0.257	0.504232683	1.17E-24	3.56E-20	up	EDNRA
Cardiomyocytes	ENSMUSG00000021796	Bmpr1a	2.155695079	3.152701239	2035	1741	0.29	0.444	0.548414174	4.64E-23	1.41E-18	up	BMPR1A
Cardiomyocytes	ENSMUSG00000002944	Cd36	14.83218883	22.2416768	2035	1741	0.833	0.874	0.5845308	2.06E-39	6.27E-35	up	CD36
Cardiomyocytes	ENSMUSG00000025348	Itga7	0.342313608	0.516211307	2035	1741	0.067	0.131	0.592501156	8.74E-18	2.66E-13	up	ITGA7
Cardiomyocytes	ENSMUSG00000022297	Fzd6	0.317665962	0.492360776	2035	1741	0.067	0.133	0.632044222	3.40E-17	1.04E-12	up	FZD6
Cardiomyocytes	ENSMUSG00000062209	Erbb4	5.765853515	9.133534256	2035	1741	0.362	0.492	0.663629814	3.69E-17	1.13E-12	up	ERBB4
Cardiomyocytes	ENSMUSG00000079355	Ackr4	0.286238107	0.470797158	2035	1741	0.063	0.117	0.717692332	9.20E-12	2.80E-07	up	ACKR4
Cardiomyocytes	ENSMUSG00000033788	Dysf	1.410073879	2.406592599	2035	1741	0.23	0.382	0.771178819	1.66E-23	5.05E-19	up	DYSF
Cardiomyocytes	ENSMUSG00000042793	Lgr6	0.574787989	1.071372528	2035	1741	0.108	0.236	0.898242066	1.89E-30	5.77E-26	up	LGR6
Cardiomyocytes	ENSMUSG00000039005	Tlr4	0.636863278	1.210523406	2035	1741	0.102	0.205	0.926468042	1.47E-19	4.48E-15	up	TLR4
Cardiomyocytes	ENSMUSG00000030849	Fgfr2	5.735142898	12.14495167	2035	1741	0.434	0.568	1.082442134	1.36E-44	4.14E-40	up	FGFR2
Endocardial_cells	ENSMUSG00000038188	Scarf1	0.513595559	0.710532029	1311	1009	0.101	0.155	0.468189112	5.22E-05	1	up	SCARF1
Endocardial_cells	ENSMUSG00000033788	Dysf	0.67054267	0.907189012	1311	1009	0.12	0.171	0.43601791	0.000982299	1	up	DYSF
Endocardial_cells	ENSMUSG00000022261	Sdc2	0.920496357	0.592646379	1311	1009	0.143	0.119	-0.635153789	0.000170784	1	down	SDC2
Endocardial_cells	ENSMUSG00000051331	Cacna1c	0.91364827	0.640307434	1311	1009	0.111	0.115	-0.512806714	0.000969272	1	down	CACNA1C
Endocardial_cells	ENSMUSG00000021466	Ptch1	0.74555559	0.567833322	1311	1009	0.134	0.13	-0.392787859	3.74E-06	0.114063571	down	PTCH1
Endocardial_cells	ENSMUSG00000067336	Bmpr2	5.53514592	7.153421676	1311	1009	0.602	0.728	0.37000624	7.05E-10	2.15E-05	up	BMPR2
Endocardial_cells	ENSMUSG00000026814	Eng	19.63868751	26.11048163	1311	1009	0.923	0.956	0.410928734	4.58E-22	1.40E-17	up	ENG
Endocardial_cells	ENSMUSG00000022969	Il10rb	0.454674302	0.604819663	1311	1009	0.092	0.13	0.411592822	0.001720878	1	up	IL10RB
Endocardial_cells	ENSMUSG00000005465	Il27ra	0.332692473	0.446108257	1311	1009	0.071	0.103	0.423094407	0.004038669	1	up	IL27RA
Endocardial_cells	ENSMUSG00000001247	Lsr	0.469657679	0.630044838	1311	1009	0.087	0.13	0.423766723	0.000130735	1	up	LSR
Endocardial_cells	ENSMUSG00000000555	Itga5	0.719531807	0.968664565	1311	1009	0.138	0.202	0.428887143	2.23E-05	0.680082364	up	ITGA5
Endocardial_cells	ENSMUSG00000030123	Plxnd1	1.235974584	1.665860349	1311	1009	0.216	0.329	0.430588267	5.40E-12	1.65E-07	up	PLXND1
Endocardial_cells	ENSMUSG00000021756	Il6st	6.773992197	9.167176488	1311	1009	0.655	0.757	0.436465564	2.22E-09	6.76E-05	up	IL6ST
Endocardial_cells	ENSMUSG00000032440	Tgfbr2	2.399053071	3.256063766	1311	1009	0.356	0.479	0.440648053	1.31E-08	0.000399612	up	TGFBR2
Endocardial_cells	ENSMUSG00000006386	Tek	4.763397991	6.47663681	1311	1009	0.566	0.719	0.443245739	1.52E-13	4.62E-09	up	TEK
Endocardial_cells	ENSMUSG00000003458	Ncstn	0.524445073	0.721883055	1311	1009	0.106	0.176	0.460898231	1.62E-10	4.93E-06	up	NCSTN
Endocardial_cells	ENSMUSG00000015468	Notch4	0.412223875	0.570368872	1311	1009	0.082	0.132	0.468370165	4.40E-06	0.134072402	up	NOTCH4
Endocardial_cells	ENSMUSG00000016493	Cd46	0.42942635	0.608878444	1311	1009	0.083	0.115	0.503644524	0.03161498	1	up	CD46
Endocardial_cells	ENSMUSG00000000530	Acvrl1	0.428848964	0.638146895	1311	1009	0.088	0.131	0.573308605	0.002631407	1	up	ACVRL1
Endocardial_cells	ENSMUSG00000024913	Lrp5	1.053852059	1.569599722	1311	1009	0.197	0.311	0.574679358	6.09E-11	1.86E-06	up	LRP5
Endocardial_cells	ENSMUSG00000022146	Osmr	1.794960306	2.704763759	1311	1009	0.277	0.428	0.591523616	1.76E-13	5.35E-09	up	OSMR
Endocardial_cells	ENSMUSG00000058396	Gpr182	1.695756762	2.574888846	1311	1009	0.291	0.432	0.602551863	1.29E-11	3.94E-07	up	GPR182
Endocardial_cells	ENSMUSG00000030341	Tnfrsf1a	0.795665912	1.214575035	1311	1009	0.159	0.248	0.610154392	1.55E-07	0.004730355	up	TNFRSF1A
Endocardial_cells	ENSMUSG00000020357	Flt4	0.392329564	0.604115363	1311	1009	0.082	0.131	0.622629134	0.000191504	1	up	FLT4
Endocardial_cells	ENSMUSG00000066705	Fxyd6	0.32408078	0.500220087	1311	1009	0.061	0.109	0.626052817	3.48E-06	0.105998861	up	FXYD6
Endocardial_cells	ENSMUSG00000074785	Plxnc1	1.109805398	1.746765377	1311	1009	0.194	0.319	0.654331716	2.46E-12	7.50E-08	up	PLXNC1
Endothelial_cells	ENSMUSG00000038188	Scarf1	0.518978582	0.67922278	2402	2880	0.09	0.135	0.388144273	1.39E-11	4.23E-07	up	SCARF1
Endothelial_cells	ENSMUSG00000038235	F11r	1.466349073	2.14945006	2402	2880	0.231	0.344	0.551707739	2.75E-20	8.38E-16	up	F11R
Endothelial_cells	ENSMUSG00000004655	Aqp1	9.352308309	4.626509397	2402	2880	0.587	0.377	-1.015382612	2.00E-69	6.10E-65	down	AQP1
Endothelial_cells	ENSMUSG00000025351	Cd63	1.345294896	0.611848946	2402	2880	0.21	0.112	-1.136546489	2.84E-27	8.64E-23	down	CD63
Endothelial_cells	ENSMUSG00000022965	Ifngr2	0.744151862	0.520276175	2402	2880	0.122	0.101	-0.516236016	2.80E-09	8.53E-05	down	IFNGR2
Endothelial_cells	ENSMUSG00000032518	Rpsa	5.424312533	3.859105714	2402	2880	0.593	0.488	-0.491162953	1.32E-27	4.03E-23	down	RPSA
Endothelial_cells	ENSMUSG00000040249	Lrp1	0.71194906	0.418757217	2402	2880	0.104	0.076	-0.765518112	6.75E-08	0.002057373	down	LRP1
Endothelial_cells	ENSMUSG00000029287	Tgfbr3	1.101734096	1.636521254	2402	2880	0.172	0.246	0.57081348	1.44E-10	4.40E-06	up	TGFBR3
Endothelial_cells	ENSMUSG00000002944	Cd36	34.30815865	60.11866991	2402	2880	0.96	0.974	0.809259588	5.42E-152	1.65E-147	up	CD36
Endothelial_cells	ENSMUSG00000022297	Fzd6	0.906438235	1.222707488	2402	2880	0.144	0.216	0.431757517	4.41E-15	1.34E-10	up	FZD6
Endothelial_cells	ENSMUSG00000033788	Dysf	3.646843701	6.702071246	2402	2880	0.44	0.63	0.877940621	1.11E-51	3.39E-47	up	DYSF
Endothelial_cells	ENSMUSG00000026814	Eng	7.216889189	9.54530122	2402	2880	0.668	0.767	0.403408746	2.20E-20	6.71E-16	up	ENG
Endothelial_cells	ENSMUSG00000024913	Lrp5	0.861020459	1.255822395	2402	2880	0.147	0.23	0.54446035	1.29E-16	3.93E-12	up	LRP5
Endothelial_cells	ENSMUSG00000052516	Robo2	1.793403882	0.970161757	2402	2880	0.177	0.1	-0.886334954	1.10E-16	3.34E-12	down	ROBO2
Endothelial_cells	ENSMUSG00000024924	Vldlr	0.726575735	0.417112928	2402	2880	0.117	0.073	-0.800527871	2.84E-09	8.66E-05	down	VLDLR
Endothelial_cells	ENSMUSG00000026072	Il1r1	1.352015381	0.945262852	2402	2880	0.201	0.158	-0.516278187	9.66E-10	2.94E-05	down	IL1R1
Endothelial_cells	ENSMUSG00000025510	Cd151	1.361549025	0.993277562	2402	2880	0.219	0.192	-0.454940821	7.98E-14	2.43E-09	down	CD151
Endothelial_cells	ENSMUSG00000044338	Aplnr	0.975274554	1.284099724	2402	2880	0.154	0.208	0.396841354	2.60E-07	0.007928818	up	APLNR
Endothelial_cells	ENSMUSG00000027312	Atrn	1.288109077	1.724573277	2402	2880	0.198	0.285	0.420956321	8.21E-16	2.50E-11	up	ATRN
Endothelial_cells	ENSMUSG00000014361	Mertk	1.150833341	1.569990773	2402	2880	0.169	0.245	0.448043691	1.76E-13	5.37E-09	up	MERTK
Endothelial_cells	ENSMUSG00000022122	Ednrb	0.796952264	1.088121116	2402	2880	0.117	0.165	0.449225496	5.62E-07	0.017131514	up	EDNRB
Endothelial_cells	ENSMUSG00000027111	Itga6	4.703426203	6.433320867	2402	2880	0.516	0.609	0.45184333	9.94E-14	3.03E-09	up	ITGA6
Endothelial_cells	ENSMUSG00000027931	Npr1	0.590320242	0.808365626	2402	2880	0.105	0.161	0.453444251	1.29E-12	3.92E-08	up	NPR1
Endothelial_cells	ENSMUSG00000052155	Acvr2a	1.456379174	2.09234965	2402	2880	0.211	0.309	0.522707835	7.97E-16	2.43E-11	up	ACVR2A
Endothelial_cells	ENSMUSG00000026836	Acvr1	0.784502545	1.144649478	2402	2880	0.136	0.206	0.544997988	6.43E-12	1.96E-07	up	ACVR1
Endothelial_cells	ENSMUSG00000037936	Scarb1	0.808176424	1.394031494	2402	2880	0.136	0.223	0.78644597	1.83E-15	5.59E-11	up	SCARB1
Endothelial_cells	ENSMUSG00000029765	Plxna4	2.168041269	3.852614253	2402	2880	0.278	0.442	0.829416428	7.67E-35	2.34E-30	up	PLXNA4
Epicardial_cells	ENSMUSG00000033278	Ptprm	1.321145578	0.435132949	481	309	0.135	0.081	-1.602038958	0.001221381	1	down	PTPRM
Epicardial_cells	ENSMUSG00000038235	F11r	0.789750902	1.158497903	481	309	0.16	0.259	0.552727708	0.00032409	1	up	F11R
Epicardial_cells	ENSMUSG00000037706	Cd81	6.164020722	4.339684137	481	309	0.678	0.576	-0.506271833	6.52E-06	0.198733583	down	CD81
Epicardial_cells	ENSMUSG00000025351	Cd63	2.3143777	1.486399795	481	309	0.37	0.304	-0.638767398	2.82E-05	0.859574897	down	CD63
Epicardial_cells	ENSMUSG00000031447	Lamp1	2.60633373	2.018153334	481	309	0.43	0.333	-0.368969905	0.00544953	1	down	LAMP1
Epicardial_cells	ENSMUSG00000040249	Lrp1	1.948179777	2.744760058	481	309	0.337	0.44	0.494531731	0.014024086	1	up	LRP1
Epicardial_cells	ENSMUSG00000067336	Bmpr2	1.631845401	2.189818142	481	309	0.277	0.385	0.424284153	0.00056838	1	up	BMPR2
Epicardial_cells	ENSMUSG00000027931	Npr1	0.680583243	1.025047717	481	309	0.139	0.23	0.590776309	0.00201074	1	up	NPR1
Epicardial_cells	ENSMUSG00000029765	Plxna4	26.3200645	35.16016269	481	309	0.917	0.893	0.417777343	3.08E-09	9.38E-05	up	PLXNA4
Epicardial_cells	ENSMUSG00000031871	Cdh5	0.674112929	0.122143618	481	309	0.112	0.029	-2.46344514	7.87E-06	0.239779411	down	CDH5
Epicardial_cells	ENSMUSG00000030342	Cd9	1.26399229	0.901797284	481	309	0.216	0.204	-0.487066756	0.001527877	1	down	CD9
Epicardial_cells	ENSMUSG00000023992	Trem2	0.833822526	0.595156769	481	309	0.139	0.133	-0.486401238	0.033266832	1	down	TREM2
Epicardial_cells	ENSMUSG00000020368	Canx	3.162069847	2.269362528	481	309	0.484	0.398	-0.478564192	0.000777657	1	down	CANX
Epicardial_cells	ENSMUSG00000025809	Itgb1	3.40362164	2.506829746	481	309	0.489	0.427	-0.44119149	0.004275523	1	down	ITGB1
Epicardial_cells	ENSMUSG00000055447	Cd47	1.909999406	2.553625363	481	309	0.341	0.453	0.418955659	0.004592981	1	up	CD47
Epicardial_cells	ENSMUSG00000001761	Smo	1.399966829	1.913704122	481	309	0.247	0.356	0.450947485	0.001430986	1	up	SMO
Epicardial_cells	ENSMUSG00000022514	Il1rap	0.746885895	1.033958851	481	309	0.141	0.239	0.469165389	0.000101373	1	up	IL1RAP
Epicardial_cells	ENSMUSG00000001507	Itga3	0.708465265	0.993355284	481	309	0.143	0.227	0.487554288	0.000976266	1	up	ITGA3
Epicardial_cells	ENSMUSG00000026674	Ddr2	0.548625406	0.79322419	481	309	0.112	0.184	0.531826165	0.006755708	1	up	DDR2
Epicardial_cells	ENSMUSG00000026343	Gpr39	2.376650389	3.436207163	481	309	0.368	0.46	0.531868604	0.030339751	1	up	GPR39
Epicardial_cells	ENSMUSG00000032537	Ephb1	1.480044817	2.152225774	481	309	0.237	0.356	0.540158124	0.000795194	1	up	EPHB1
Epicardial_cells	ENSMUSG00000035000	Dpp4	9.64110415	14.15729694	481	309	0.775	0.819	0.554270777	1.74E-06	0.053028222	up	DPP4
Epicardial_cells	ENSMUSG00000051076	Vtcn1	1.566229325	2.305494078	481	309	0.247	0.382	0.55775096	0.000108261	1	up	VTCN1
Epicardial_cells	ENSMUSG00000024621	Csf1r	0.582337066	0.859966691	481	309	0.125	0.188	0.562346362	0.040536393	1	up	CSF1R
Epicardial_cells	ENSMUSG00000053646	Plxnb1	0.284344221	0.43725827	481	309	0.058	0.12	0.620669802	0.000218249	1	up	PLXNB1
Epicardial_cells	ENSMUSG00000026070	Il18r1	2.109881442	3.304442054	481	309	0.349	0.472	0.647220045	0.000444858	1	up	IL18R1
Epicardial_cells	ENSMUSG00000002602	Axl	0.336917438	0.553218152	481	309	0.069	0.136	0.715286012	0.000856563	1	up	AXL
Epicardial_cells	ENSMUSG00000026457	Adipor1	0.281449785	0.466014419	481	309	0.062	0.113	0.72729409	0.027101678	1	up	ADIPOR1
Epicardial_cells	ENSMUSG00000025321	Itgb8	0.872782327	1.622885465	481	309	0.158	0.294	0.894790997	3.01E-05	0.917426911	up	ITGB8
Epicardial_cells	ENSMUSG00000009376	Met	0.811950963	1.517663546	481	309	0.158	0.304	0.902304872	5.89E-06	0.179638854	up	MET
Fibroblasts	ENSMUSG00000054263	Lifr	0.970400275	1.47876498	3428	2988	0.168	0.285	0.607689814	1.41E-36	4.31E-32	up	LIFR
Fibroblasts	ENSMUSG00000005534	Insr	1.025371315	1.337478325	3428	2988	0.185	0.274	0.383336238	9.10E-28	2.77E-23	up	INSR
Fibroblasts	ENSMUSG00000037706	Cd81	6.861805456	5.075364506	3428	2988	0.695	0.623	-0.435069385	1.43E-37	4.34E-33	down	CD81
Fibroblasts	ENSMUSG00000022965	Ifngr2	0.629719013	0.470948544	3428	2988	0.123	0.111	-0.419061567	5.90E-13	1.80E-08	down	IFNGR2
Fibroblasts	ENSMUSG00000032518	Rpsa	5.013877673	3.525331517	3428	2988	0.606	0.518	-0.508155716	1.78E-44	5.42E-40	down	RPSA
Fibroblasts	ENSMUSG00000079355	Ackr4	0.499388239	0.642138183	3428	2988	0.093	0.137	0.362657733	6.53E-14	1.99E-09	up	ACKR4
Fibroblasts	ENSMUSG00000006386	Tek	1.582326692	2.078642281	3428	2988	0.273	0.372	0.39357224	1.10E-19	3.35E-15	up	TEK
Fibroblasts	ENSMUSG00000016493	Cd46	0.474092081	0.674959456	3428	2988	0.086	0.139	0.509543003	1.12E-13	3.42E-09	up	CD46
Fibroblasts	ENSMUSG00000024913	Lrp5	0.619040862	0.90430292	3428	2988	0.116	0.2	0.546697973	7.60E-30	2.32E-25	up	LRP5
Fibroblasts	ENSMUSG00000022146	Osmr	1.28032525	1.965071163	3428	2988	0.209	0.34	0.618031942	2.57E-33	7.84E-29	up	OSMR
Fibroblasts	ENSMUSG00000074785	Plxnc1	0.378695829	0.538435232	3428	2988	0.072	0.122	0.507620288	8.17E-19	2.49E-14	up	PLXNC1
Fibroblasts	ENSMUSG00000026072	Il1r1	1.746121341	2.246422966	3428	2988	0.276	0.385	0.363457372	1.62E-25	4.94E-21	up	IL1R1
Fibroblasts	ENSMUSG00000025510	Cd151	0.805319424	0.604841719	3428	2988	0.155	0.148	-0.412944109	5.38E-20	1.64E-15	down	CD151
Fibroblasts	ENSMUSG00000026836	Acvr1	0.701567521	0.90563246	3428	2988	0.132	0.196	0.368297378	3.15E-18	9.60E-14	up	ACVR1
Fibroblasts	ENSMUSG00000001761	Smo	0.561855454	0.722388474	3428	2988	0.105	0.152	0.362518798	3.22E-12	9.80E-08	up	SMO
Fibroblasts	ENSMUSG00000026674	Ddr2	2.469553343	3.221435486	3428	2988	0.374	0.498	0.383439937	4.39E-25	1.34E-20	up	DDR2
Fibroblasts	ENSMUSG00000035000	Dpp4	0.430531045	0.657699464	3428	2988	0.069	0.108	0.611195504	2.17E-07	0.006618256	up	DPP4
Fibroblasts	ENSMUSG00000025321	Itgb8	0.592199127	0.869478222	3428	2988	0.109	0.182	0.553989848	5.77E-23	1.76E-18	up	ITGB8
Fibroblasts	ENSMUSG00000074743	Thbd	0.610444021	0.435666929	3428	2988	0.116	0.095	-0.486538608	2.46E-07	0.007498687	down	THBD
Fibroblasts	ENSMUSG00000028128	F3	0.900045577	0.655570883	3428	2988	0.158	0.139	-0.457186513	3.55E-14	1.08E-09	down	F3
Fibroblasts	ENSMUSG00000032193	Ldlr	0.594711293	0.440758311	3428	2988	0.106	0.096	-0.432116981	1.05E-09	3.19E-05	down	LDLR
Fibroblasts	ENSMUSG00000033768	Nrxn2	0.383200319	0.492514545	3428	2988	0.073	0.112	0.361984028	5.57E-13	1.70E-08	up	NRXN2
Fibroblasts	ENSMUSG00000015243	Abca1	1.061074745	1.365489646	3428	2988	0.185	0.259	0.363861779	1.00E-16	3.05E-12	up	ABCA1
Fibroblasts	ENSMUSG00000021464	Ror2	0.843913175	1.090865103	3428	2988	0.146	0.216	0.37026753	8.72E-21	2.66E-16	up	ROR2
Fibroblasts	ENSMUSG00000000392	Fap	1.501166726	2.014034365	3428	2988	0.225	0.301	0.423979611	1.29E-12	3.92E-08	up	FAP
Fibroblasts	ENSMUSG00000028469	Npr2	0.394967207	0.531274387	3428	2988	0.079	0.128	0.427630591	5.92E-19	1.81E-14	up	NPR2
Fibroblasts	ENSMUSG00000026768	Itga8	0.535834721	0.724132283	3428	2988	0.092	0.135	0.434395202	2.81E-10	8.56E-06	up	ITGA8
Fibroblasts	ENSMUSG00000026640	Plxna2	0.889294892	1.204636703	3428	2988	0.157	0.237	0.437821853	7.35E-22	2.24E-17	up	PLXNA2
Fibroblasts	ENSMUSG00000022883	Robo1	1.394769142	1.894245021	3428	2988	0.2	0.301	0.441569331	1.27E-24	3.88E-20	up	ROBO1
Fibroblasts	ENSMUSG00000043017	Ptgir	0.333144858	0.460258137	3428	2988	0.066	0.11	0.466174034	1.78E-17	5.42E-13	up	PTGIR
Fibroblasts	ENSMUSG00000057722	Lepr	0.573497356	0.792860604	3428	2988	0.099	0.144	0.467210818	3.32E-09	0.000101152	up	LEPR
Fibroblasts	ENSMUSG00000005533	Igf1r	2.195764565	3.149868948	3428	2988	0.339	0.484	0.520548531	5.20E-32	1.59E-27	up	IGF1R
Fibroblasts	ENSMUSG00000041961	Znrf3	0.45140143	0.660354642	3428	2988	0.085	0.138	0.548728929	7.49E-15	2.28E-10	up	ZNRF3
Fibroblasts	ENSMUSG00000032377	Plscr4	1.726682562	2.545881616	3428	2988	0.275	0.428	0.560135572	3.27E-40	9.96E-36	up	PLSCR4
Fibroblasts	ENSMUSG00000025089	Gfra1	1.670089627	2.49563713	3428	2988	0.24	0.356	0.579454076	1.02E-23	3.10E-19	up	GFRA1
Fibroblasts	ENSMUSG00000024778	Fas	0.350215567	0.526114159	3428	2988	0.069	0.122	0.586994969	4.04E-19	1.23E-14	up	FAS
Fibroblasts	ENSMUSG00000046159	Chrm3	0.764275991	1.162849735	3428	2988	0.082	0.119	0.605434373	2.70E-06	0.082156625	up	CHRM3
Fibroblasts	ENSMUSG00000027253	Lrp4	0.461838149	0.779710326	3428	2988	0.088	0.155	0.755423564	4.40E-18	1.34E-13	up	LRP4
Fibroblasts	ENSMUSG00000011171	Vipr2	0.260398212	0.784765019	3428	2988	0.052	0.173	1.591171088	7.34E-58	2.24E-53	up	VIPR2
Lymphatic_ECs	ENSMUSG00000038188	Scarf1	0.266658914	0.836571666	180	128	0.061	0.18	1.649125099	0.004865865	1	up	SCARF1
Lymphatic_ECs	ENSMUSG00000005534	Insr	0.60131149	1.080615874	180	128	0.111	0.219	0.845562945	0.022579158	1	up	INSR
Lymphatic_ECs	ENSMUSG00000004655	Aqp1	4.850998791	2.61228341	180	128	0.5	0.398	-0.892944908	0.000241186	1	down	AQP1
Lymphatic_ECs	ENSMUSG00000022297	Fzd6	1.72059221	2.524558028	180	128	0.267	0.453	0.553098926	0.001188927	1	up	FZD6
Lymphatic_ECs	ENSMUSG00000016493	Cd46	0.427442623	0.593470373	180	128	0.067	0.148	0.473350829	0.007499605	1	up	CD46
Lymphatic_ECs	ENSMUSG00000027312	Atrn	0.876305627	1.423794484	180	128	0.161	0.305	0.700171589	0.005232695	1	up	ATRN
Lymphatic_ECs	ENSMUSG00000032377	Plscr4	1.31986724	1.817695187	180	128	0.233	0.352	0.461687534	0.041715823	1	up	PLSCR4
Lymphatic_ECs	ENSMUSG00000031565	Fgfr1	1.309085029	0.923913323	180	128	0.217	0.227	-0.502683451	0.020498509	1	down	FGFR1
Lymphatic_ECs	ENSMUSG00000020598	Nrcam	1.360374311	1.009395636	180	128	0.2	0.211	-0.430475041	0.028614223	1	down	NRCAM
Lymphatic_ECs	ENSMUSG00000016028	Celsr1	0.390809517	0.595707802	180	128	0.056	0.133	0.608012307	0.01361839	1	up	CELSR1
Lymphatic_ECs	ENSMUSG00000038119	Cdon	0.156875912	0.415934076	180	128	0.033	0.109	1.406158507	0.020368638	1	up	CDON
Lymphatic_ECs	ENSMUSG00000002897	Il17ra	0.170123671	0.527876075	180	128	0.044	0.125	1.633040883	0.035565252	1	up	IL17RA
Mono_Macro	ENSMUSG00000054263	Lifr	3.78556836	5.101044531	1393	1420	0.471	0.575	0.430272947	1.10E-08	0.000336032	up	LIFR
Mono_Macro	ENSMUSG00000029648	Flt1	1.561954255	0.726412011	1393	1420	0.154	0.075	-1.104386009	2.27E-10	6.92E-06	down	FLT1
Mono_Macro	ENSMUSG00000033278	Ptprm	2.607416457	1.874816397	1393	1420	0.236	0.173	-0.475850091	3.98E-05	1	down	PTPRM
Mono_Macro	ENSMUSG00000001240	Ramp2	0.628125939	0.377150726	1393	1420	0.105	0.071	-0.735759834	5.41E-05	1	down	RAMP2
Mono_Macro	ENSMUSG00000045092	S1pr1	0.858720702	0.6130618	1393	1420	0.149	0.128	-0.486089149	8.13E-05	1	down	S1PR1
Mono_Macro	ENSMUSG00000004655	Aqp1	0.890682055	0.334977904	1393	1420	0.113	0.053	-1.410575941	6.13E-10	1.87E-05	down	AQP1
Mono_Macro	ENSMUSG00000022579	Gpihbp1	0.676216168	0.482818442	1393	1420	0.102	0.075	-0.485918285	0.023973502	1	down	GPIHBP1
Mono_Macro	ENSMUSG00000062960	Kdr	0.704754389	0.486832598	1393	1420	0.106	0.082	-0.533603165	0.0057361	1	down	KDR
Mono_Macro	ENSMUSG00000037706	Cd81	8.133641801	5.104567338	1393	1420	0.724	0.589	-0.672102248	2.69E-31	8.21E-27	down	CD81
Mono_Macro	ENSMUSG00000020154	Ptprb	0.860000639	0.55305529	1393	1420	0.11	0.08	-0.636820926	0.001062682	1	down	PTPRB
Mono_Macro	ENSMUSG00000032518	Rpsa	4.365590493	3.105714778	1393	1420	0.553	0.448	-0.49123806	4.83E-15	1.47E-10	down	RPSA
Mono_Macro	ENSMUSG00000023830	Igf2r	0.949737785	0.576696221	1393	1420	0.151	0.103	-0.719619436	3.86E-06	0.117668608	down	IGF2R
Mono_Macro	ENSMUSG00000022817	Itgb5	1.263575955	1.843298395	1393	1420	0.2	0.308	0.54474134	8.23E-12	2.51E-07	up	ITGB5
Mono_Macro	ENSMUSG00000051331	Cacna1c	1.198242615	0.899777662	1393	1420	0.128	0.108	-0.413239659	0.012418932	1	down	CACNA1C
Mono_Macro	ENSMUSG00000024913	Lrp5	0.401821386	0.551575086	1393	1420	0.08	0.117	0.456905484	0.00076658	1	up	LRP5
Mono_Macro	ENSMUSG00000074785	Plxnc1	0.77176476	1.04841347	1393	1420	0.137	0.206	0.441925399	2.39E-07	0.007297419	up	PLXNC1
Mono_Macro	ENSMUSG00000024924	Vldlr	0.604957145	0.336672106	1393	1420	0.103	0.057	-0.845298756	3.05E-05	0.929654645	down	VLDLR
Mono_Macro	ENSMUSG00000025510	Cd151	0.555258937	0.399909576	1393	1420	0.107	0.087	-0.473385969	0.005494668	1	down	CD151
Mono_Macro	ENSMUSG00000027111	Itga6	0.616724565	0.904264033	1393	1420	0.1	0.139	0.552043395	0.006076969	1	up	ITGA6
Mono_Macro	ENSMUSG00000002602	Axl	0.725248199	1.023334568	1393	1420	0.133	0.174	0.496673247	0.009064732	1	up	AXL
Mono_Macro	ENSMUSG00000055737	Ghr	1.08100518	0.533836307	1393	1420	0.149	0.08	-1.017767331	1.01E-08	0.000307162	down	GHR
Mono_Macro	ENSMUSG00000021745	Ptprg	1.697462079	0.977855029	1393	1420	0.139	0.099	-0.795624304	0.000266295	1	down	PTPRG
Mono_Macro	ENSMUSG00000024610	Cd74	55.54308811	33.71067496	1393	1420	0.785	0.627	-0.720400195	5.19E-29	1.58E-24	down	CD74
Mono_Macro	ENSMUSG00000020122	Egfr	1.695823096	1.262377718	1393	1420	0.228	0.204	-0.425812824	2.87E-06	0.087468219	down	EGFR
Mono_Macro	ENSMUSG00000030579	Tyrobp	6.632204542	4.96595326	1393	1420	0.619	0.58	-0.41741052	3.02E-16	9.20E-12	down	TYROBP
Mono_Macro	ENSMUSG00000039115	Itga9	3.329000537	2.583511647	1393	1420	0.428	0.361	-0.365743211	1.63E-06	0.049709761	down	ITGA9
Mono_Macro	ENSMUSG00000025810	Nrp1	6.086894279	7.89239242	1393	1420	0.602	0.661	0.37475096	2.85E-06	0.086919161	up	NRP1
Mono_Macro	ENSMUSG00000025993	Slc40a1	0.64822571	0.885327612	1393	1420	0.089	0.125	0.449655579	0.005202468	1	up	SLC40A1
Mono_Macro	ENSMUSG00000079227	Ccr5	1.894254727	2.72888244	1393	1420	0.245	0.347	0.526656604	5.84E-09	0.000177982	up	CCR5
Mono_Macro	ENSMUSG00000021624	Cd180	0.575820461	0.869641148	1393	1420	0.108	0.168	0.594716513	9.18E-06	0.279845958	up	CD180
Mono_Macro	ENSMUSG00000007613	Tgfbr1	2.154424519	3.402702532	1393	1420	0.263	0.338	0.659353916	5.49E-05	1	up	TGFBR1
Mono_Macro	ENSMUSG00000025743	Sdc3	0.674974684	1.084183391	1393	1420	0.127	0.212	0.683622851	1.46E-09	4.46E-05	up	SDC3
Mono_Macro	ENSMUSG00000025804	Ccr1	0.385459194	0.679828966	1393	1420	0.061	0.13	0.818431662	4.07E-11	1.24E-06	up	CCR1
Mono_Macro	ENSMUSG00000027087	Itgav	0.834426041	1.607215097	1393	1420	0.153	0.261	0.945623807	8.38E-12	2.56E-07	up	ITGAV
Mono_Macro	ENSMUSG00000026321	Tnfrsf11a	1.502096436	2.962122082	1393	1420	0.236	0.422	0.979606325	7.45E-25	2.27E-20	up	TNFRSF11A
Mono_Macro	ENSMUSG00000049103	Ccr2	1.26000175	2.610088518	1393	1420	0.093	0.173	1.050613776	1.36E-09	4.15E-05	up	CCR2
Mono_Macro	ENSMUSG00000028459	Cd72	0.441544108	0.945548271	1393	1420	0.072	0.149	1.098419415	2.65E-10	8.09E-06	up	CD72
pericytes	ENSMUSG00000054263	Lifr	0.813130275	1.177187577	428	815	0.124	0.191	0.533730942	0.003470824	1	up	LIFR
pericytes	ENSMUSG00000038188	Scarf1	0.343402065	0.807567092	428	815	0.068	0.144	1.233441985	0.000202843	1	up	SCARF1
pericytes	ENSMUSG00000031996	Aplp2	3.491826766	2.664633836	428	815	0.418	0.375	-0.390031864	0.000234031	1	down	APLP2
pericytes	ENSMUSG00000022965	Ifngr2	0.963397642	0.709300623	428	815	0.157	0.134	-0.441680538	0.006456085	1	down	IFNGR2
pericytes	ENSMUSG00000032518	Rpsa	4.559483404	3.216670926	428	815	0.507	0.42	-0.503288813	5.44E-06	0.165721983	down	RPSA
pericytes	ENSMUSG00000040249	Lrp1	3.224659827	4.394967477	428	815	0.4	0.552	0.446693599	1.17E-06	0.035567301	up	LRP1
pericytes	ENSMUSG00000029287	Tgfbr3	1.748971642	3.079378621	428	815	0.252	0.438	0.816096729	4.54E-10	1.38E-05	up	TGFBR3
pericytes	ENSMUSG00000022817	Itgb5	1.695592147	2.199598836	428	815	0.243	0.345	0.375431743	0.000111939	1	up	ITGB5
pericytes	ENSMUSG00000031616	Ednra	3.334420757	4.781012109	428	815	0.43	0.542	0.519866805	0.000410433	1	up	EDNRA
pericytes	ENSMUSG00000021796	Bmpr1a	1.678528446	2.40207607	428	815	0.257	0.361	0.517058964	0.000782864	1	up	BMPR1A
pericytes	ENSMUSG00000002944	Cd36	5.454930911	7.652170508	428	815	0.507	0.656	0.488300502	1.18E-06	0.035827436	up	CD36
pericytes	ENSMUSG00000025348	Itga7	1.621429633	2.263745751	428	815	0.252	0.361	0.481420273	0.000171069	1	up	ITGA7
pericytes	ENSMUSG00000032440	Tgfbr2	0.869981292	1.139011724	428	815	0.126	0.204	0.38868715	1.63E-05	0.495298877	up	TGFBR2
pericytes	ENSMUSG00000024924	Vldlr	0.752478869	0.43385454	428	815	0.112	0.079	-0.794298865	0.005848796	1	down	VLDLR
pericytes	ENSMUSG00000052155	Acvr2a	0.49420256	0.660140674	428	815	0.077	0.118	0.41759764	0.016660089	1	up	ACVR2A
pericytes	ENSMUSG00000022514	Il1rap	0.802321776	1.180733024	428	815	0.131	0.198	0.557372311	0.0067964	1	up	IL1RAP
pericytes	ENSMUSG00000026674	Ddr2	1.540235777	1.977849197	428	815	0.229	0.302	0.360760494	0.010378026	1	up	DDR2
pericytes	ENSMUSG00000021464	Ror2	0.473534744	0.781486235	428	815	0.075	0.131	0.722630143	0.003243685	1	up	ROR2
pericytes	ENSMUSG00000055737	Ghr	2.370606694	3.424992989	428	815	0.278	0.374	0.530825975	0.002121758	1	up	GHR
pericytes	ENSMUSG00000025743	Sdc3	0.425579144	0.73657917	428	815	0.07	0.126	0.791270044	0.004223129	1	up	SDC3
pericytes	ENSMUSG00000027087	Itgav	1.060976442	1.48748984	428	815	0.171	0.244	0.487448206	0.005396531	1	up	ITGAV
pericytes	ENSMUSG00000007655	Cav1	0.730274862	0.419310388	428	815	0.112	0.064	-0.800274516	0.01367008	1	down	CAV1
pericytes	ENSMUSG00000024620	Pdgfrb	16.46591077	21.14203549	428	815	0.895	0.929	0.36063003	7.88E-10	2.40E-05	up	PDGFRB
pericytes	ENSMUSG00000027878	Notch2	0.55241941	0.716296948	428	815	0.089	0.129	0.374734044	0.020099721	1	up	NOTCH2
pericytes	ENSMUSG00000031751	Amfr	0.574740943	0.754789228	428	815	0.093	0.131	0.393102139	0.045945712	1	up	AMFR
pericytes	ENSMUSG00000032547	Ryk	1.369260189	1.844839568	428	815	0.208	0.294	0.430071586	0.000899944	1	up	RYK
pericytes	ENSMUSG00000017057	Il13ra1	0.516851499	0.729544833	428	815	0.086	0.134	0.497165446	0.012917341	1	up	IL13RA1
pericytes	ENSMUSG00000032135	Mcam	2.188199075	3.117339133	428	815	0.29	0.433	0.510551467	1.39E-06	0.042225219	up	MCAM
pericytes	ENSMUSG00000050587	Lrrc4c	1.6384639	3.016200627	428	815	0.185	0.342	0.88034829	1.26E-08	0.000383818	up	LRRC4C
pericytes	ENSMUSG00000032492	Pth1r	0.239015887	0.677760676	428	815	0.04	0.12	1.503278794	2.78E-06	0.084790853	up	PTH1R
Schwann_cells	ENSMUSG00000026235	Epha4	0.570774017	0	43	24	0.116	0	-12.47895669	0.047396337	1	down	EPHA4
Schwann_cells	ENSMUSG00000031616	Ednra	0	0.851586942	43	24	0	0.125	13.05610752	0.019016199	1	up	EDNRA
Schwann_cells	ENSMUSG00000022969	Il10rb	0.663558679	0	43	24	0.14	0	-12.69622574	0.027270863	1	down	IL10RB
Schwann_cells	ENSMUSG00000022146	Osmr	0.842438633	0	43	24	0.209	0	-13.04052712	0.005054603	1	down	OSMR
Schwann_cells	ENSMUSG00000024621	Csf1r	0.613704268	0	43	24	0.116	0	-12.58356296	0.047396337	1	down	CSF1R
Schwann_cells	ENSMUSG00000027087	Itgav	2.092747188	7.865584818	43	24	0.395	0.583	1.910105403	0.021825548	1	up	ITGAV
Schwann_cells	ENSMUSG00000017057	Il13ra1	0	0.769381691	43	24	0	0.125	12.90967128	0.019016199	1	up	IL13RA1
Schwann_cells	ENSMUSG00000020393	Kremen1	0.66168175	0	43	24	0.116	0	-12.69213979	0.047396337	1	down	KREMEN1
Schwann_cells	ENSMUSG00000062312	Erbb2	0.627832394	0	43	24	0.14	0	-12.61639353	0.027270863	1	down	ERBB2
Schwann_cells	ENSMUSG00000032511	Scn5a	0.588649912	0	43	24	0.163	0	-12.52343922	0.015641758	1	down	SCN5A
Schwann_cells	ENSMUSG00000044337	Ackr3	0.53454322	0	43	24	0.116	0	-12.38436075	0.047396337	1	down	ACKR3
Schwann_cells	ENSMUSG00000022967	Ifnar1	0.480877014	1.448200075	43	24	0.07	0.292	1.590320694	0.043304555	1	up	IFNAR1
Schwann_cells	ENSMUSG00000068748	Ptprz1	5.116177052	15.68122513	43	24	0.605	0.75	1.615881183	0.004272063	1	up	PTPRZ1
Schwann_cells	ENSMUSG00000031119	Gpc4	0.136198032	0.832878085	43	24	0.023	0.25	2.61151381	0.013361964	1	up	GPC4
Schwann_cells	ENSMUSG00000003534	Ddr1	0.094019866	1.320680503	43	24	0.023	0.208	3.810747646	0.042765078	1	up	DDR1
Schwann_cells	ENSMUSG00000033295	Ptprf	0	1.346781422	43	24	0	0.25	13.71733522	0.000455816	1	up	PTPRF
Smooth_moscle_cells	ENSMUSG00000002602	Axl	0.832033398	1.960908294	83	100	0.145	0.33	1.23670891	0.01225188	1	up	AXL
Smooth_moscle_cells	ENSMUSG00000026768	Itga8	4.050554636	10.52312401	83	100	0.373	0.58	1.377349782	0.007701482	1	up	ITGA8
Smooth_moscle_cells	ENSMUSG00000034353	Ramp1	0.546758625	1.758790069	83	100	0.108	0.25	1.685425499	0.035985071	1	up	RAMP1
Smooth_moscle_cells	ENSMUSG00000020689	Itgb3	0.098796169	0.703716764	83	100	0.012	0.12	2.831213343	0.007079643	1	up	ITGB3
Smooth_moscle_cells	ENSMUSG00000030281	Il17rc	0.055791585	0.655565774	83	100	0.012	0.11	3.552257595	0.015255361	1	up	IL17RC
T_cell	ENSMUSG00000056962	Jmjd6	0.563377127	0.051752334	77	67	0.117	0.015	-3.441876212	0.032019855	1	down	JMJD6
T_cell	ENSMUSG00000033278	Ptprm	2.641435766	1.225790182	77	67	0.234	0.06	-1.107547199	0.006214207	1	down	PTPRM
T_cell	ENSMUSG00000037706	Cd81	2.774046647	0.431145808	77	67	0.377	0.09	-2.685461715	3.43E-05	1	down	CD81
T_cell	ENSMUSG00000025351	Cd63	1.670034856	0.357484646	77	67	0.208	0.075	-2.223607904	0.02435434	1	down	CD63
T_cell	ENSMUSG00000040249	Lrp1	1.331406212	0.263515907	77	67	0.169	0.03	-2.336549825	0.013854223	1	down	LRP1
T_cell	ENSMUSG00000026814	Eng	2.377620848	0.585803214	77	67	0.286	0.09	-2.02084508	0.009281395	1	down	ENG
T_cell	ENSMUSG00000021756	Il6st	1.503591643	0.578106726	77	67	0.26	0.104	-1.378851452	0.048844893	1	down	IL6ST
T_cell	ENSMUSG00000029765	Plxna4	0.649392342	0.084215731	77	67	0.143	0.03	-2.945438789	0.028743039	1	down	PLXNA4
T_cell	ENSMUSG00000026070	Il18r1	3.347363049	6.598719352	77	67	0.325	0.537	0.979139793	0.024444238	1	up	IL18R1
T_cell	ENSMUSG00000025089	Gfra1	0.622620142	0	77	67	0.117	0	-12.60436823	0.001008331	1	down	GFRA1
T_cell	ENSMUSG00000055737	Ghr	1.927402718	0.51245774	77	67	0.273	0.09	-1.910946455	0.013391016	1	down	GHR
T_cell	ENSMUSG00000021745	Ptprg	2.783295502	0.67905768	77	67	0.26	0.09	-2.035027453	0.016496061	1	down	PTPRG
T_cell	ENSMUSG00000030579	Tyrobp	2.148409593	3.583603829	77	67	0.13	0.299	0.738115194	0.024550705	1	up	TYROBP
T_cell	ENSMUSG00000039115	Itga9	0.643265681	0	77	67	0.104	0	-12.65142327	0.002078112	1	down	ITGA9
T_cell	ENSMUSG00000027087	Itgav	1.187897475	3.265738054	77	67	0.221	0.358	1.458921482	0.039103912	1	up	ITGAV
T_cell	ENSMUSG00000044337	Ackr3	0.769655725	0.037304107	77	67	0.104	0.015	-4.363132107	0.030944153	1	down	ACKR3
T_cell	ENSMUSG00000049939	Lrrc4	2.907341358	2.224182935	77	67	0.468	0.284	-0.386409779	0.030156894	1	down	LRRC4
T_cell	ENSMUSG00000068227	Il2rb	2.859207919	6.15209252	77	67	0.364	0.522	1.105434658	0.017922945	1	up	IL2RB
T_cell	ENSMUSG00000030165	Klrd1	2.230949903	5.462259892	77	67	0.221	0.373	1.291801587	0.040594941	1	up	KLRD1
T_cell	ENSMUSG00000024669	Cd5	0.485156391	2.487495684	77	67	0.052	0.194	2.357932901	0.027667195	1	up	CD5
T_cell	ENSMUSG00000015533	Itga2	0.4388268	2.282965078	77	67	0.065	0.254	2.378919716	0.005809274	1	up	ITGA2
T_cell	ENSMUSG00000030789	Itgax	0.161422053	1.368977679	77	67	0.039	0.194	3.083401243	0.003483019	1	up	ITGAX
T_cell	ENSMUSG00000034220	Gpc1	0	0.672532772	77	67	0	0.104	12.71560336	0.001454942	1	up	GPC1
		UR receptor	UR ligand
		10	4
		4	1
		17	13
		23	20
		18	17
		21	26
		32	18
		9	7
		17	9
		25	21
		8	8
		5	8
		9	3
		DR receptor	DR ligand
		0	2
		8	2
		16	10
		3	12
		9	20
		9	12
		7	12
		3	5
		20	23
		5	11
		8	10
		0	7
		14	9
