# Supplementary material for: Single-cell RNA-seq of heart reveals intercellular communication drivers of myocardial fibrosis in diabetic cardiomyopathy
Source: eLife. 2023 Apr 3;12:e80479. doi: 10.7554/eLife.80479 (PMC10110238; doi:10.7554/eLife.80479)
Supplement: Supplementary file 13. [file elife-80479-supp13.xls]

## Sheet: Sheet1
Supplementary file 13: The cognate ligands of Egfr
Pair.Name	Ligand.ApprovedSymbol	Ligand.Name	Receptor.ApprovedSymbol	Receptor.Name	DLRP	HPMR	IUPHAR	HPRD	STRING.binding	STRING.experiment	HPMR.Ligand	HPMR.Receptor	PMID.Manual	Pair.Source	Pair.Evidence
AMH_EGFR	AMH	anti-Mullerian hormone	EGFR	epidermal growth factor receptor				HPRD			AMH	EGFR		novel	literature supported
ANXA1_EGFR	ANXA1	annexin A1	EGFR	epidermal growth factor receptor				HPRD	STRING.binding		ANXA1	EGFR		novel	literature supported
AREGB_EGFR	AREGB	amphiregulin B	EGFR	epidermal growth factor receptor			IUPHAR					EGFR		known	literature supported
AREG_EGFR	AREG	amphiregulin	EGFR	epidermal growth factor receptor	DLRP	HPMR	IUPHAR	HPRD			AREG	EGFR		known	literature supported
BTC_EGFR	BTC	betacellulin	EGFR	epidermal growth factor receptor	DLRP	HPMR	IUPHAR	HPRD			BTC	EGFR		known	literature supported
CDH1_EGFR	CDH1	cadherin 1, type 1, E-cadherin (epithelial)	EGFR	epidermal growth factor receptor				HPRD	STRING.binding		CDH1	EGFR		novel	literature supported
DCN_EGFR	DCN	decorin	EGFR	epidermal growth factor receptor				HPRD	STRING.binding	STRING.experiment		EGFR		novel	literature supported
EFEMP1_EGFR	EFEMP1	EGF containing fibulin-like extracellular matrix protein 1	EGFR	epidermal growth factor receptor					STRING.binding			EGFR	19804359	novel	literature supported
EGF_EGFR	EGF	epidermal growth factor	EGFR	epidermal growth factor receptor	DLRP	HPMR	IUPHAR	HPRD	STRING.binding	STRING.experiment	EGF	EGFR		known	literature supported
EPGN_EGFR	EPGN	epithelial mitogen	EGFR	epidermal growth factor receptor			IUPHAR					EGFR		known	literature supported
EREG_EGFR	EREG	epiregulin	EGFR	epidermal growth factor receptor	DLRP	HPMR	IUPHAR	HPRD	STRING.binding		EREG	EGFR		known	literature supported
FGL1_EGFR	FGL1	fibrinogen-like 1	EGFR	epidermal growth factor receptor									24768768	novel	literature supported
GNAI2_EGFR	GNAI2	guanine nucleotide binding protein (G protein), alpha inhibiting activity polypeptide 2	EGFR	epidermal growth factor receptor				HPRD			GNAI2	EGFR		novel	literature supported
HBEGF_EGFR	HBEGF	heparin-binding EGF-like growth factor	EGFR	epidermal growth factor receptor	DLRP	HPMR	IUPHAR	HPRD	STRING.binding		HBEGF	EGFR		known	literature supported
HSP90AA1_EGFR	HSP90AA1	heat shock protein 90kDa alpha (cytosolic), class A member 1	EGFR	epidermal growth factor receptor									18199556	novel	literature supported
ICAM1_EGFR	ICAM1	intercellular adhesion molecule 1	EGFR	epidermal growth factor receptor				HPRD			ICAM1	EGFR		novel	literature supported
L1CAM_EGFR	L1CAM	L1 cell adhesion molecule	EGFR	epidermal growth factor receptor					STRING.binding		L1CAM	EGFR	14718570	novel	literature supported
SPINK1_EGFR	SPINK1	serine peptidase inhibitor, Kazal type 1	EGFR	epidermal growth factor receptor					STRING.binding			EGFR	21368222	novel	literature supported
TGFA_EGFR	TGFA	transforming growth factor, alpha	EGFR	epidermal growth factor receptor	DLRP	HPMR	IUPHAR	HPRD	STRING.binding	STRING.experiment	TGFA	EGFR		known	literature supported
TNC_EGFR	TNC	tenascin C	EGFR	epidermal growth factor receptor				HPRD	STRING.binding			EGFR		novel	literature supported
VCAN_EGFR	VCAN	versican	EGFR	epidermal growth factor receptor					STRING.binding			EGFR	16045811	novel	literature supported
