# Supplementary material for: Single-cell RNA-seq of heart reveals intercellular communication drivers of myocardial fibrosis in diabetic cardiomyopathy
Source: eLife. 2023 Apr 3;12:e80479. doi: 10.7554/eLife.80479 (PMC10110238; doi:10.7554/eLife.80479)
Supplement: Supplementary file 14. [file elife-80479-supp14.xls]

## Sheet: Sheet1
Supplementary file 14: The cognate ligands of Pdgfra
Pair.Name	Ligand.ApprovedSymbol	Ligand.Name	Receptor.ApprovedSymbol	Receptor.Name	DLRP	HPMR	IUPHAR	HPRD	STRING.binding	STRING.experiment	HPMR.Ligand	HPMR.Receptor	PMID.Manual	Pair.Source	Pair.Evidence
PDGFA_PDGFRA	PDGFA	platelet-derived growth factor alpha polypeptide	PDGFRA	platelet-derived growth factor receptor, alpha polypeptide	DLRP	HPMR		HPRD	STRING.binding	STRING.experiment	PDGFA	PDGFRA		known	literature supported
PDGFB_PDGFRA	PDGFB	platelet-derived growth factor beta polypeptide	PDGFRA	platelet-derived growth factor receptor, alpha polypeptide	DLRP	HPMR		HPRD	STRING.binding	STRING.experiment	PDGFB	PDGFRA		known	literature supported
PDGFC_PDGFRA	PDGFC	platelet derived growth factor C	PDGFRA	platelet-derived growth factor receptor, alpha polypeptide		HPMR		HPRD	STRING.binding	STRING.experiment	PDGFC	PDGFRA		known	literature supported
