# Supplementary material for: Single-cell RNA-seq of heart reveals intercellular communication drivers of myocardial fibrosis in diabetic cardiomyopathy
Source: eLife. 2023 Apr 3;12:e80479. doi: 10.7554/eLife.80479 (PMC10110238; doi:10.7554/eLife.80479)
Supplement: Supplementary file 15. [file elife-80479-supp15.xls]

Supplementary file 15: 10 transcriptionally distinct fibroblast subpopulations
GeneID	GeneName	Cluster 0	Cluster 1	Cluster 2	Cluster 3	Cluster 4	Cluster 5	Cluster 6	Cluster 7	Cluster 8	Cluster 9
ENSMUSG00000051951	Xkr4	0.776150339	0.76530349	0.908294701	0.602046492	1.969639525	0.64000143	0.714632338	0.421172628	1.115397523	0.546008303
ENSMUSG00000089699	Gm1992	0.061302224	0.089683217	0.09187157	0.068363811	0.117616806	0	0.00930986	0.131262868	0.041499157	0
ENSMUSG00000102343	Gm37381	0	0	0	0	0	0	0	0	0	0
ENSMUSG00000025900	Rp1	0.033191144	0.017317363	0.00711131	0.012716371	0	0.008711864	0.013092878	0	0.073194057	0
ENSMUSG00000025902	Sox17	0.011434692	0.014026316	0.010325831	0.066143455	0	0	0.052580042	0.211729044	0	0
ENSMUSG00000104328	Gm37323	0	0.001457203	0	0	0	0	0	0	0	0
ENSMUSG00000033845	Mrpl15	0.375666628	0.474976495	0.394238638	0.458430388	0.185552914	0.359226202	0.193609195	0.594484259	0.24011834	0.346775585
ENSMUSG00000025903	Lypla1	0.226773875	0.253935771	0.255444364	0.374248798	0.123660858	0.219689536	0.207720661	0.445075615	0.304456711	0.190387116
ENSMUSG00000104217	Gm37988	0.030091172	0.019341907	0.034437097	0.020006042	0.034463286	0.036378812	0.043160747	0.016443258	0.107800019	0
ENSMUSG00000033813	Tcea1	0.772777493	0.719641408	0.766093004	0.722184743	0.656435069	0.802774619	0.692739328	0.705781406	0.556204889	0.68440461
ENSMUSG00000002459	Rgs20	0.153071043	0.180607687	0.170864431	0.119614854	0.200070293	0.060863486	0.011342086	0.00928443	0.02994012	0.096521117
ENSMUSG00000085623	Gm16041	0	0.002594761	0.002278307	0	0	0	0	0	0	0
ENSMUSG00000033793	Atp6v1h	0.605721479	0.744834176	0.61637758	0.499905763	0.621206411	0.576214674	0.507689869	0.576564993	0.792837381	0.826070753
ENSMUSG00000025905	Oprk1	0	0	0.008645284	0	0	0	0	0	0	0
ENSMUSG00000033774	Npbwr1	0	0	0	0	0	0	0	0	0	0
ENSMUSG00000025907	Rb1cc1	2.134566274	2.387691183	1.996009899	1.725582749	2.283763359	1.856557772	2.065058579	2.046901699	2.177497991	1.846794224
ENSMUSG00000090031	4732440D04Rik	0.475776196	0.517759049	0.385238804	0.361970163	0.711061198	0.250773426	0.398729298	0.293249171	0.329946817	0.422242042
ENSMUSG00000087247	Alkal1	0	0.005629223	0	0	0	0	0	0	0	0
ENSMUSG00000033740	St18	0.01775013	0.010336636	0.005858987	0.012022699	0.02552479	0	0.037158835	0	0	0
ENSMUSG00000051285	Pcmtd1	1.792686033	1.839887426	1.605329586	1.426571988	1.797943615	1.901996296	2.034870124	1.946001877	1.767622914	1.642187921
ENSMUSG00000097797	Gm26901	0.023191859	0.0178455	0.01596598	0.032846853	0	0.024051907	0	0	0.020749579	0.034866045
ENSMUSG00000103067	Gm30414	0.001518473	0	0	0	0	0	0	0	0	0
ENSMUSG00000025909	Sntg1	0.806738749	0.816183417	1.184563423	0.884178069	13.76351228	0.567391856	6.840501676	1.216281	0.378259507	0.715391893
ENSMUSG00000061024	Rrs1	0.307745873	0.280789314	0.34267134	0.413276392	0.201489096	0.292824425	0.379992912	0.21997796	0.30447937	0.237594625
ENSMUSG00000025911	Adhfe1	0.586077799	0.457017401	0.292335172	0.418501024	1.097174289	0.141164539	0.526889874	0.529497366	0.336869334	0.448529228
ENSMUSG00000067879	Vxn	0.032993848	0.037501208	0.005767491	0.018915338	0.030086408	0	0.011490885	0.050087152	0	0.024639524
ENSMUSG00000099827	Gm29520	0	0	0	0	0	0	0	0	0	0
ENSMUSG00000025912	Mybl1	0.070892843	0.044454755	0.067794318	0.007067362	0.094025676	0.129817366	0.045713032	0.023755	0.041950708	0.022204064
ENSMUSG00000045210	Vcpip1	0.516526688	0.514071672	0.539543033	0.403919035	0.667244932	0.533705977	0.390420628	0.475262349	0.479107428	0.239531016
ENSMUSG00000097893	1700034P13Rik	0.008591737	0.006437638	0.006670277	0.046232615	0	0.038253559	0.034360956	0	0	0
ENSMUSG00000025915	Sgk3	0.399099523	0.543796535	0.406172446	0.258308726	0.428582673	0.445384966	0.449743021	0.619699178	0.530730538	0.420878692
ENSMUSG00000046101	Mcmdc2	0.064724039	0.068239864	0.050542704	0.020809019	0.136652684	0.064656501	0.038026524	0.071681152	0.053315561	0.041358403
ENSMUSG00000098234	Snhg6	0.132580404	0.14103376	0.110683164	0.208385255	0.156028836	0.187687665	0.08043793	0.229752401	0.138170329	0.060900157
ENSMUSG00000099032	Tcf24	0.029342846	0.044163143	0.009897228	0.031978675	0.009594424	0.094999816	0.023850211	0	0	0
ENSMUSG00000025916	Ppp1r42	0.002288657	0.004430079	0.002182108	0	0	0	0	0	0	0
ENSMUSG00000087199	Gm15818	0	0	0	0	0	0	0	0	0	0
ENSMUSG00000025917	Cops5	0.491776036	0.589016356	0.469380103	0.459126775	0.480372623	0.366319422	0.538846111	0.411097959	0.602923487	0.388352127
ENSMUSG00000056763	Cspp1	1.203767286	1.28021405	1.127384573	0.782782572	0.955567991	1.195612831	1.027970139	1.695544144	0.989178044	1.475077317
ENSMUSG00000067851	Arfgef1	1.615604708	1.903341134	1.563355134	1.595046452	1.673533733	1.591923034	1.425465109	1.544252655	2.401885977	2.069215088
ENSMUSG00000042501	Cpa6	0.003796456	0.002829463	0	0	0.010190688	0	0	0.022207417	0	0
ENSMUSG00000048960	Prex2	5.519950688	5.855821754	3.37262959	2.964646309	4.304094449	3.029712839	2.34508019	5.569133222	1.41710275	4.007556673
ENSMUSG00000057715	A830018L16Rik	0.032222492	0.0241724	0.025672329	0.023256076	0.060172816	0	0	0	0.03994009	0.016614166
ENSMUSG00000097171	Gm17644	0	0	0	0	0	0	0	0	0	0
ENSMUSG00000101314	Gm29663	0	0	0	0	0	0	0	0	0	0
ENSMUSG00000016918	Sulf1	4.353913254	4.619009833	6.797371048	3.834606036	3.66976849	7.444465545	6.114354635	4.014609208	2.620902728	6.273980048
ENSMUSG00000025938	Slco5a1	0.03671768	0.038114628	0.03864227	0.028058069	0.012070997	0.036868319	0.091543279	0.061953499	0.102702858	0.023484322
ENSMUSG00000099498	Gm29283	0	0	0	0	0	0	0	0	0	0
ENSMUSG00000042414	Prdm14	0.001821348	0	0	0	0	0	0	0	0	0
ENSMUSG00000005886	Ncoa2	1.972552807	2.24867097	1.675977238	1.303152014	2.541940154	1.520732026	1.684496101	2.067449267	2.683496773	1.792231304
ENSMUSG00000101476	Gm29570	0	0.003586481	0	0	0	0.010830387	0	0	0	0
ENSMUSG00000025935	Tram1	1.389282231	1.265664388	1.752596426	1.050801902	1.085127699	1.706124344	1.230251054	1.353326131	0.858525398	1.296741464
ENSMUSG00000025937	Lactb2	0.401039573	0.461034557	0.389122605	0.384758519	0.290233478	0.49351187	0.463020943	0.486340679	0.194631878	0.395042951
ENSMUSG00000067813	Xkr9	0	0	0	0	0	0	0	0	0	0
ENSMUSG00000025932	Eya1	0.061923642	0.049415997	0.023424685	0.072882766	0.014625015	0.061203507	0	0.145417907	0.240870229	0.095168584
ENSMUSG00000054493	Gm9947	0.463283961	0.51819792	0.320677469	0.212377202	0.357583232	0.059507023	0.610634065	0.200444056	0.089701189	0.302133258
ENSMUSG00000025930	Msc	0.550567445	0.709865308	0.204345578	0.309047903	0.256609022	0.208928879	0.584653483	0.392197982	0.053015242	0.593233451
ENSMUSG00000032769	Trpa1	0.006571945	0.01014528	0.008961778	0	0	0	0.022636316	0	0	0
ENSMUSG00000092083	Kcnb2	0.003414523	0.020787765	0	0.014742	0.184634107	0	0.291380316	0.034238602	0.718908399	0
ENSMUSG00000025925	Terf1	0.65131095	0.795852108	0.602883001	0.296141985	0.518645615	0.528703893	0.850218335	0.6225531	0.470353797	0.821653616
ENSMUSG00000032719	Sbspon	0.001353902	0.006297462	0.016303704	0.009311143	0.019188849	0	0	0	0.020920502	0.024932806
ENSMUSG00000067795	4930444P10Rik	0.002454467	0.006545613	0.002001792	0	0.030086408	0	0	0	0.041710115	0
ENSMUSG00000043716	Rpl7	2.710419496	2.484080339	2.988138374	4.294811315	2.649529938	3.347102971	2.782497073	2.478365732	2.617643699	2.792113538
ENSMUSG00000025921	Rdh10	0.194489209	0.230972715	0.359234292	0.258931411	0.22455967	0.27554536	0.090596527	0.239038181	0.140962736	0.171191209
ENSMUSG00000100868	Gm28095	0	0.005908584	0	0	0	0	0	0	0	0
ENSMUSG00000025920	Stau2	0.394134128	0.44927039	0.487025992	0.433373225	0.447535939	0.383013935	0.435111032	0.296580256	0.685183418	0.46925152
ENSMUSG00000089982	Gm7568	0	0.010240699	0.004288762	0	0.065383408	0	0	0	0	0
ENSMUSG00000025939	Ube2w	0.733407164	0.919444407	0.768137134	0.70761001	0.88966706	0.9006592	0.804614146	0.775079673	0.704884932	0.901599552
ENSMUSG00000079658	Eloc	0.496299774	0.496064626	0.476696329	0.572450725	0.521097398	0.663535861	0.42003687	0.457423861	0.542957488	0.436104211
ENSMUSG00000097744	D030040B21Rik	0	0	0	0	0	0	0	0	0	0
ENSMUSG00000025940	Tmem70	0.450440256	0.389202187	0.342886489	0.466219001	0.495240891	0.305902596	0.273460974	0.660751369	0.347815211	0.257983208
ENSMUSG00000025779	Ly96	0.14184181	0.126623457	0.174575003	0.123632925	0.094955341	0.133271129	0.101547152	0.162104881	0.142697138	0.277125549
ENSMUSG00000101640	Gm28376	0.093613661	0.060787093	0.032691754	0.121749532	0.325176771	0.048755548	0.135640442	0.169575108	0.359181095	0.106389739
ENSMUSG00000042686	Jph1	0.075824977	0.076748848	0.042912375	0.147576303	0.151539123	0.032191699	0.120522765	0.061296604	0.435845052	0.041171158
ENSMUSG00000100110	Gm28783	0	0	0	0	0	0	0	0	0	0
ENSMUSG00000025777	Gdap1	0	0	0	0	0	0	0	0	0	0
ENSMUSG00000099899	Gm28784	0	0	0	0	0	0	0	0	0	0
ENSMUSG00000067780	Pi15	0.835892403	0.854437802	0.945885522	0.795210419	1.067565755	0.668883253	1.232109154	0.566619032	1.26831128	0.642398732
ENSMUSG00000100053	Gm28154	0.402571288	0.469846237	0.364973454	0.270181589	0.501814176	0.202218454	0.783398207	0.295162863	0.774939437	0.22973316
ENSMUSG00000085125	Gm16070	0.033893405	0.045329064	0.031037183	0.022852116	0.128639178	0.130670391	0.072754098	0.105260643	1.00370626	0.107562736
ENSMUSG00000025776	Crispld1	0.03341248	0.039743455	0.033891463	0.081641541	0.030086408	0.333245836	0.055307287	0.237584627	2.414971459	0.085122206
ENSMUSG00000099895	Gm28153	0.026763868	0.036878145	0.030266724	0	0.080521346	0.123388596	0.027618053	0.119603603	0.97589197	0
ENSMUSG00000025774	Crisp4	0	0	0	0	0	0	0	0	0	0
ENSMUSG00000073735	Defb18	0	0	0	0	0	0	0	0	0	0
ENSMUSG00000067773	Defb41	0	0	0	0	0	0	0	0	0	0
ENSMUSG00000089787	Gm15825	0	0	0	0	0	0	0	0	0	0
ENSMUSG00000042596	Tfap2d	0.00381476	0.007625979	0	0	0	0	0	0	0	0
ENSMUSG00000025927	Tfap2b	0.001955309	0	0	0	0	0	0	0	0	0
ENSMUSG00000100538	Gm28340	0	0	0	0	0	0	0	0	0	0
ENSMUSG00000043760	Pkhd1	0.007105819	0.00879159	0.003587476	0.005506296	0	0	0	0	0	0
ENSMUSG00000089914	4930486I03Rik	0	0	0	0	0	0	0	0	0	0
ENSMUSG00000099906	Gm28653	0	0	0	0	0	0	0	0	0	0.029368231
ENSMUSG00000025929	Il17a	0	0	0	0	0	0	0	0	0	0
ENSMUSG00000041872	Il17f	0	0	0	0	0	0	0	0	0	0
ENSMUSG00000041859	Mcm3	0.048470909	0.031090884	0.033119223	0.024282554	0.016760526	0.011822595	0.084744268	0.034699089	0	0.071458838
ENSMUSG00000102121	Gm28065	0	0	0	0	0	0	0	0	0	0
ENSMUSG00000097934	6720483E21Rik	0.002647365	0.003781485	0	0	0	0	0.013496369	0	0.053015242	0
ENSMUSG00000025931	Paqr8	0.094260033	0.090272086	0.036023761	0.030316531	0.080220405	0.032675144	0.085904176	0.085424123	0.058480023	0.129885934
ENSMUSG00000041809	Efhc1	0.103986394	0.135850718	0.120377294	0.033212837	0.120924633	0.113630233	0.116757143	0.029668308	0.238529598	0.110704936
ENSMUSG00000041779	Tram2	0.626303316	0.703974963	0.739046438	0.494810583	0.523227843	0.585905431	0.281627909	0.472532076	0.571926675	0.597844695
ENSMUSG00000099971	Gm28287	0	0	0	0	0	0	0	0	0	0
ENSMUSG00000025933	Tmem14a	0.161561397	0.139374068	0.155225661	0.112951478	0.082048183	0.171955231	0.119013158	0.024393576	0.182932541	0.103263001
ENSMUSG00000025934	Gsta3	1.346177571	1.50353929	0.97820178	0.956024261	0.542068032	0.577206267	0.54239311	0.768218691	0.326978605	1.235944595
ENSMUSG00000099343	Gm28836	0.182820604	0.30427982	0.093148291	0.078870587	0.039532808	0.163686627	0.065838635	0.130927366	0.046376812	0.21628048
ENSMUSG00000067750	Khdc1a	0	0	0	0	0	0	0	0	0	0
ENSMUSG00000041722	Khdc1c	0	0	0	0	0	0	0	0	0	0
ENSMUSG00000085079	Khdc1b	0	0.001748643	0	0	0	0	0	0	0	0
ENSMUSG00000028033	Kcnq5	0.011927802	0.014143653	0.002166859	0	0	0	0.05862583	0.141192262	7.940410646	0
ENSMUSG00000041670	Rims1	0.042188028	0.052743036	0.010348985	0.01820341	0.284380624	0.022051981	0.276251979	0	0.375870319	0.211531406
ENSMUSG00000073730	Ppp1r14bl	0	0	0	0	0	0	0	0	0	0
ENSMUSG00000097970	Gm27028	0	0	0	0	0	0	0	0	0	0
ENSMUSG00000100775	Gm29107	0.014797608	0.051135871	0.014540723	0.022108908	0.06255723	0.018706554	0	0.034699089	0.05826657	0.062549027
ENSMUSG00000026158	Ogfrl1	0.231956707	0.158632098	0.149347962	0.19622036	0.343710832	0.189399605	0.145131161	0.230948216	0.170831292	0.069240507
ENSMUSG00000099503	Gm28822	0	0	0	0	0	0	0	0	0	0
ENSMUSG00000026156	B3gat2	0.174913384	0.218365145	0.162409335	0.157697735	0.163996918	0.168454108	0.207640147	0.078186092	0.299183109	0.304541317
ENSMUSG00000026155	Smap1	0.888767283	0.994386969	0.956260295	0.538229081	1.225595592	1.421959038	1.217165782	0.592639404	0.786021316	0.917768257
ENSMUSG00000026154	Sdhaf4	0.360070608	0.367561844	0.264696439	0.485144464	0.235139896	0.277444765	0.409653595	0.269993124	0.235455419	0.249975286
ENSMUSG00000026153	Fam135a	0.754338652	0.861876203	0.60004686	0.431976188	0.663349909	0.719582079	0.920714083	0.682149532	1.208484483	0.797806192
ENSMUSG00000026147	Col9a1	0	0	0	0	0	0	0	0.022099252	0.158956544	0
ENSMUSG00000026141	Col19a1	0	0.003618657	0	0	0	0	0.015837068	0	0	0
ENSMUSG00000073725	Lmbrd1	1.063943059	1.079890345	1.229559726	0.820865799	1.026239791	1.296020274	1.453504485	1.04281879	1.383533645	1.147709225
ENSMUSG00000100483	Gm28237	0	0	0	0	0	0	0	0	0	0
ENSMUSG00000099392	Gm29414	0	0	0	0	0	0	0	0	0	0
ENSMUSG00000033569	Adgrb3	0.002383681	0.01646764	0.004714664	0	0.074553525	0	0.036665577	0.026003745	0	0.045293547
ENSMUSG00000073722	4931408C20Rik	0	0	0	0	0	0	0	0	0	0
ENSMUSG00000101514	Gm5524	0	0	0	0	0	0	0	0	0	0
ENSMUSG00000048411	Gm597	0	0	0	0	0	0	0	0	0	0
ENSMUSG00000053185	Gm9898	0	0	0	0	0	0	0	0	0	0
ENSMUSG00000048874	Phf3	1.992621185	2.066858714	1.973152259	1.31345079	2.017029146	2.065833267	1.765459929	2.050069278	1.443661373	2.269108081
ENSMUSG00000117310	Ptp4a1	0.004521659	0.011984361	0	0.003843939	0	0	0.020393659	0	0.021953897	0.015031717
ENSMUSG00000026064	Ptp4a1	0.007509356	0.015673962	0.03069494	0.022696388	0	0.071619852	0.023186632	0.019253577	0	0.025528699
ENSMUSG00000117091	Gm5698	0	0	0	0	0	0	0	0	0	0
ENSMUSG00000086727	4931428L18Rik	0	0.001457203	0	0.005459833	0	0.010358272	0.025800093	0	0	0
ENSMUSG00000100237	Gm28644	0	0	0	0	0	0	0	0	0	0
ENSMUSG00000100910	Gm29128	0.00136073	0.002750003	0	0	0	0	0	0	0	0
ENSMUSG00000050217	Lgsn	0	0	0	0	0	0	0	0	0	0
ENSMUSG00000026063	Pih1d3	0	0	0	0	0	0	0	0	0	0
ENSMUSG00000026058	Khdrbs2	0.001959569	0.004231245	0.013553149	0.006809642	0.030086408	0.0307072	0.013157098	0	0.055363322	0
ENSMUSG00000091318	Gm5415	0	0	0	0	0	0	0	0	0	0
ENSMUSG00000102917	Gm37724	0	0	0	0	0	0	0	0	0	0
ENSMUSG00000104230	Gm37591	0	0	0	0	0	0	0	0	0	0
ENSMUSG00000026134	Prim2	0.322600664	0.311355063	0.27917112	0.095477992	0.502827901	0.254304272	0.269416765	0.1961449	0.188321951	0.227977743
ENSMUSG00000004768	Rab23	0.33107755	0.353709242	0.476114312	0.289908901	0.241838215	0.63583718	0.363818571	0.207438595	0.492004523	0.238552936
ENSMUSG00000042215	Bag2	0.114039951	0.107689161	0.126285813	0.155966045	0.198558411	0.136135721	0.1280969	0.161766761	0.281689457	0.116546926
ENSMUSG00000042197	Zfp451	0.825507003	0.876257948	0.848193407	0.599430869	0.683808459	0.980089778	0.528240411	0.537385914	0.599169846	0.788368373
ENSMUSG00000042182	Bend6	0.156779493	0.168567562	0.214306291	0.102234323	0.197322433	0.248640669	0.165415941	0.069492745	0.225446317	0.145671026
ENSMUSG00000026131	Dst	5.784060245	5.997480873	6.069066909	6.195601949	6.442949371	6.609292612	6.614360164	7.071671043	9.303973821	7.132274812
ENSMUSG00000104397	Gm37958	0	0	0	0	0	0	0	0	0	0
ENSMUSG00000102336	Gm37233	0.019662885	0.024394583	0	0.024623026	0	0.01201409	0	0	0	0
ENSMUSG00000042111	Ccdc115	0.095049539	0.086850896	0.129028889	0.138940536	0.106431764	0.086272598	0.094391941	0.012196788	0.173110235	0.163486507
ENSMUSG00000101711	Gm28306	0.002823995	0.005563864	0.001998351	0	0	0	0	0	0	0
ENSMUSG00000026127	Imp4	0.12322814	0.111113558	0.114071642	0.092566413	0.107517093	0.094364439	0.068139316	0.134452927	0.078018103	0.239431306
ENSMUSG00000026126	Ptpn18	0.054279148	0.078027046	0.056609649	0.063069722	0.045794668	0.0272368	0.058122289	0.199647043	0	0.158462123
ENSMUSG00000101223	4930568A12Rik	0.002393195	0.002949518	0	0	0.017001251	0	0	0	0	0
ENSMUSG00000026125	Prss39	0.00383149	0	0	0	0	0	0	0	0	0
ENSMUSG00000026124	Cfc1	0	0	0	0	0	0	0	0	0	0
ENSMUSG00000037529	Prss40	0	0	0	0	0	0	0	0	0	0
ENSMUSG00000045815	1700101I19Rik	0	0	0	0	0	0	0	0	0	0
ENSMUSG00000045174	Amer3	0	0	0	0	0	0	0	0	0	0
ENSMUSG00000037509	Arhgef4	0.013815126	0.027621829	0.00932726	0.00954592	0	0.037946576	0	0.046858599	0	0.154765664
ENSMUSG00000118272	Arhgef4	0	0	0	0	0	0	0	0	0	0
ENSMUSG00000104002	Gm38336	0.00152147	0.010172755	0.002358004	0	0	0	0.048138912	0	0	0
ENSMUSG00000037503	Fam168b	0.609491292	0.628318059	0.529185738	0.436876653	0.567179427	0.845962785	0.617226209	0.868202282	0.586645905	0.564706249
ENSMUSG00000026123	Plekhb2	0.121898647	0.114914082	0.14335694	0.250307768	0.215362837	0.199793263	0.179541291	0.217336479	0.023021583	0.109235238
ENSMUSG00000104417	Gm37068	0	0	0	0	0	0	0	0	0	0
ENSMUSG00000101714	Gm28415	0	0	0	0	0	0	0	0	0	0
ENSMUSG00000102531	1110002O04Rik	0.002772491	0	0	0.008620927	0	0.031682666	0	0.046412522	0	0
ENSMUSG00000102279	Gm37146	0	0	0	0	0	0	0	0	0	0
ENSMUSG00000103708	Gm33222	0	0.001791483	0	0	0	0	0	0	0	0
ENSMUSG00000104201	4930535G08Rik	0	0	0	0	0	0	0	0	0	0
ENSMUSG00000045216	Hs6st1	0.192731081	0.184004965	0.187451604	0.218511002	0.320732757	0.17344722	0.143829209	0.196013665	0.088349882	0.207591937
ENSMUSG00000104523	Gm37335	0	0.001637287	0	0	0	0	0	0	0	0
ENSMUSG00000102202	Gm33280	0.010070738	0.008102717	0.011412786	0	0.017005068	0	0.020864587	0	0	0.02233938
ENSMUSG00000037470	Uggt1	0.831531432	0.821032285	0.941820131	0.759915185	0.677155512	0.744889067	0.729166725	0.824612876	0.771272049	1.142241985
ENSMUSG00000047180	Neurl3	0.010594561	0.019278535	0.03805065	0.030654622	0.045528535	0	0.027978132	0.149991294	0.037011335	0.020494323
ENSMUSG00000037447	Arid5a	0.029898466	0.053769006	0.057538634	0.0163794	0	0.040794794	0.104313507	0.067666626	0.122358768	0.078549465
ENSMUSG00000102762	4930403P22Rik	0.067641256	0.030212864	0.037203593	0.019262392	0.00792775	0.095531524	0.052981175	0.044740364	0.031891569	0.018611854
ENSMUSG00000010453	Kansl3	0.583262369	0.553090971	0.670692319	0.384636878	0.680072695	0.484965692	0.480295787	0.520871397	0.46947269	0.39738484
ENSMUSG00000037432	Fer1l5	0	0.008123993	0.014055729	0	0	0.010548256	0	0.04405791	0	0.0283762
ENSMUSG00000001143	Lman2l	0.186290545	0.147140722	0.208634107	0.179272578	0.119549838	0.114376078	0.120878123	0.202944162	0.160456483	0.144284555
ENSMUSG00000037408	Cnnm4	0.048257118	0.053138149	0.100032929	0.042129205	0.039954866	0.080305192	0.047643123	0.091814621	0.162672494	0
ENSMUSG00000001138	Cnnm3	0.309254053	0.283333623	0.35297554	0.303530767	0.396017939	0.279332735	0.307935589	0.165150236	0.478343917	0.12721686
ENSMUSG00000102845	Gm38033	0.011491123	0.01551301	0.009676168	0.007209722	0	0	0.025730489	0	0	0
ENSMUSG00000067653	Ankrd23	0.117567162	0.142395231	0.140066292	0.352848265	0.143391467	0.055216735	0.270471293	0.106573552	0.187699846	0.067290435
ENSMUSG00000109510	Gm42417	0.0024693	0	0	0	0	0	0	0	0	0
ENSMUSG00000079610	Ankrd39	0.094312128	0.075369588	0.056368509	0.074490085	0.105790476	0.154787268	0.209226244	0.050773324	0.021953897	0.184572212
ENSMUSG00000026121	Sema4c	0.354770941	0.364032911	0.632119734	0.357456868	0.316880705	0.384540972	0.22113842	0.475274303	0.247840538	0.696285074
ENSMUSG00000046337	Fam178b	0.012618006	0.01481069	0.016246364	0.026342752	0.025877027	0.031776403	0.02121001	0.023967021	0	0
ENSMUSG00000061518	Cox5b	4.62448621	5.190311573	3.873868021	8.068879598	5.062603787	3.842730518	4.309196679	5.213462352	5.507425933	3.891748859
ENSMUSG00000037351	Actr1b	0.243746442	0.308385117	0.260825716	0.272526561	0.291140943	0.223567551	0.364479693	0.332241709	0.285443555	0.154928215
ENSMUSG00000102416	4933424G06Rik	0.002070063	0.001988217	0	0	0	0.011822595	0	0	0	0
ENSMUSG00000104237	Gm33533	0	0	0	0	0	0	0	0	0	0
ENSMUSG00000026117	Zap70	0	0	0	0	0	0	0	0	0	0
ENSMUSG00000026116	Tmem131	1.067319142	1.026589545	1.001709924	0.861868731	0.932490368	0.985290343	0.905965833	1.036930468	1.37971377	1.51670387
ENSMUSG00000050122	Vwa3b	0.025649777	0.041623396	0.01994156	0.020702977	0.02355646	0.037613188	0.038297067	0.016443258	0.0456621	0.0686658
ENSMUSG00000103603	Gm37020	0	0.004007566	0	0	0	0.008202261	0	0	0	0
ENSMUSG00000026114	Cnga3	0	0.007759254	0	0	0	0	0	0	0	0
ENSMUSG00000026113	Inpp4a	0.36806813	0.420015541	0.329762423	0.173042607	0.336473109	0.337753358	0.200201628	0.335609077	0.430574098	0.339458169
ENSMUSG00000086064	4930439A04Rik	0.005598994	0.00215733	0.008177285	0.006435296	0	0	0	0	0	0
ENSMUSG00000026112	Coa5	0.180742339	0.170695221	0.21725734	0.295967426	0.161969366	0.133188588	0.119016246	0.259800803	0.230228651	0.132570425
ENSMUSG00000026111	Unc50	0.59365738	0.394526514	0.666493509	0.590122115	0.344649414	0.51644206	0.546007019	0.703736559	0.361898645	0.489787207
ENSMUSG00000026110	Mgat4a	0.237419998	0.29217548	0.237111096	0.103085885	0.291529213	0.344453553	0.225372627	0.615637338	0.277987699	0.201878145
ENSMUSG00000026090	2010300C02Rik	0.004843789	0.001866301	0.006759706	0.017713555	0	0	0	0	0.033458804	0
ENSMUSG00000089767	4930556I23Rik	0	0	0	0	0	0	0	0	0	0
ENSMUSG00000060771	Tsga10	0.471732781	0.476554023	0.410143829	0.241612566	0.488875409	0.325324965	0.702532895	0.297625408	0.667346728	0.465208416
ENSMUSG00000097268	Gm26805	0	0.001225115	0	0	0	0	0	0	0	0
ENSMUSG00000037216	Lipt1	0.025379397	0.022729358	0.025181646	0.033302671	0.00982079	0.038038427	0	0.037973722	0.047746941	0.09688465
ENSMUSG00000026088	Mitd1	0.228400261	0.229452403	0.187847758	0.213835713	0.136080924	0.16400706	0.348357678	0.325095069	0.287383058	0.406311084
ENSMUSG00000026087	Mrpl30	0.879654769	0.931624407	0.77375916	1.632405481	1.020375427	0.709588061	1.068058974	0.878727789	0.923297992	0.538071782
ENSMUSG00000061584	Lyg2	0	0.003204684	0	0	0	0	0	0	0	0
ENSMUSG00000087374	Gm15457	0	0	0	0	0	0	0	0	0	0
ENSMUSG00000026085	Lyg1	0	0	0	0	0	0	0	0	0	0
ENSMUSG00000058407	Txndc9	0.508007431	0.545326163	0.463220585	0.53491394	0.538341005	0.380350744	0.409383448	0.43881081	0.593682477	0.722716919
ENSMUSG00000026083	Eif5b	1.221634383	1.292668614	1.271071162	1.666205705	1.357972375	1.56154179	1.460677876	1.144459468	1.335203405	1.039246974
ENSMUSG00000026082	Rev1	0.994856677	1.036182187	0.892426286	0.493167342	0.905931302	1.229538489	0.723357067	0.855677708	0.704910652	0.947426776
ENSMUSG00000102716	Gm5099	0	0	0	0	0	0	0	0	0	0
ENSMUSG00000037138	Aff3	1.449613813	1.406504353	1.571212941	0.822142258	2.0399434	1.783281511	1.190098579	0.81283509	2.507072493	1.353572417
ENSMUSG00000085391	Gm16150	0.054128697	0.037418011	0.049132191	0.034068965	0.085600996	0.043223406	0.107714991	0.073094073	0.083677219	0.024639524
ENSMUSG00000085280	Gm16151	0.00205118	0.009563605	0	0	0	0	0	0	0	0
ENSMUSG00000087131	Gm16152	0.02193768	0.035482773	0.020682463	0.024217152	0.038833037	0.034604133	0.011703969	0.051802735	0	0.030306336
ENSMUSG00000048814	Lonrf2	0.073366736	0.115131114	0.064255753	0.070697536	0.147229644	0.045086598	0.146262278	0.09098721	0.239726891	0.022426352
ENSMUSG00000026080	Chst10	0.048401943	0.054758956	0.049893501	0.067041896	0.058008917	0.019625321	0.030777831	0.056606257	0.078288387	0.096268642
ENSMUSG00000103647	Gm37707	0	0	0	0	0	0	0	0	0	0
ENSMUSG00000067604	Nms	0	0	0	0	0	0	0	0	0	0
ENSMUSG00000026078	Pdcl3	0.317689355	0.270410661	0.345158617	0.543359863	0.265804098	0.266966114	0.311953567	0.275622649	0.224908301	0.366288696
ENSMUSG00000104188	Gm37821	0.029668382	0.013851281	0.030297933	0.01131908	0.08022613	0.007750496	0	0	0	0.020736735
ENSMUSG00000026077	Npas2	2.144722411	2.704442318	1.773160427	1.042590147	2.495392516	1.626489797	1.283497158	1.274333072	0.7630361	2.615744384
ENSMUSG00000073702	Rpl31	1.193923728	1.135452362	1.26680055	1.952528462	1.110975066	1.23743781	1.450243786	1.320007177	1.31172321	1.2811685
ENSMUSG00000003134	Tbc1d8	0.223855741	0.264081078	0.202522819	0.161012821	0.213067401	0.185735207	0.167001165	0.339962966	0.146703528	0.281558745
ENSMUSG00000003135	Cnot11	0.123824759	0.135559574	0.15325748	0.118297601	0.137952936	0.109727913	0.134632906	0.052562907	0.019384541	0.173262232
ENSMUSG00000048234	Rnf149	0.239076594	0.314340401	0.193893114	0.306173093	0.151083483	0.287442612	0.158341808	0.347801213	0.348213758	0.499122715
ENSMUSG00000050967	Creg2	0	0	0	0	0	0	0	0	0	0
ENSMUSG00000097083	D930019O06Rik	0	0	0	0	0	0	0	0	0.053015242	0
ENSMUSG00000057173	Rfx8	0	0.00373013	0	0.004492198	0	0	0	0	0	0
ENSMUSG00000091937	Gm3646	0.017176405	0.049785886	0.034943978	0.042892782	0	0.040239888	0	0.019318595	0	0.034171679
ENSMUSG00000101634	1700066B17Rik	0	0	0.004666328	0	0	0	0	0	0	0.016724422
ENSMUSG00000026074	Map4k4	2.586988564	2.641180921	1.693538092	1.602338035	3.302744045	1.600611008	3.30888568	2.911587862	2.68501749	2.391386449
ENSMUSG00000026073	Il1r2	0.022104948	0.021051312	0.014780021	0.019538156	0.083099554	0	0.085819087	0	0	0
ENSMUSG00000097899	Gm16894	0.07956211	0.051692628	0.079764374	0.034119942	0.104523734	0	0.007562723	0.024205104	0.027826087	0
ENSMUSG00000026072	Il1r1	2.425005613	2.143626469	1.672761718	1.07802461	1.628843802	1.039601618	2.469478331	1.603441452	1.898488146	1.975114119
ENSMUSG00000070942	Il1rl2	0.304028903	0.334656024	0.273565751	0.116664573	0.380355995	0.342201878	0.214615665	0.125529289	0	0.126426623
ENSMUSG00000026069	Il1rl1	0	0.014702974	0	0.014240572	0	0	0	0	0	0
ENSMUSG00000026070	Il18r1	0.007719778	0.003319264	0.002166859	0	0.036761935	0	0	0.0149828	0.017574692	0.024412036
ENSMUSG00000026068	Il18rap	0	0.003398087	0	0.006252141	0	0	0	0	0	0
ENSMUSG00000104441	Gm35801	0	0	0	0	0	0	0	0	0	0
ENSMUSG00000026065	Slc9a4	0	0.008144353	0	0	0	0	0	0	0	0
ENSMUSG00000026062	Slc9a2	0	0.005525643	0.007229315	0.008369518	0	0	0	0.03628763	0	0
ENSMUSG00000103679	Gm37623	0	0	0	0	0.018011787	0	0	0	0	0
ENSMUSG00000103270	Gm37915	0.002810026	0	0.006185301	0.029390186	0.015935544	0	0.023452708	0	0	0
ENSMUSG00000041945	Mfsd9	0.016090987	0.012052983	0.017004274	0.048599311	0.052762484	0	0	0.01304053	0	0
ENSMUSG00000079588	Tmem182	0.092343869	0.110035093	0.107270961	0.194589778	0.074452409	0.074702651	0.0673469	0.124212259	0.352187072	0.097107117
ENSMUSG00000104072	4930448I06Rik	0	0	0	0	0	0	0	0	0	0
ENSMUSG00000100185	Gm28634	0	0	0	0	0	0	0	0	0	0
ENSMUSG00000100832	Gm29260	0.001647833	0	0.003266266	0	0	0	0	0	0	0
ENSMUSG00000053640	Gm9915	0	0	0	0	0	0	0	0	0	0
ENSMUSG00000101919	Gm29664	0	0	0	0	0	0	0	0	0	0
ENSMUSG00000101299	Gm28175	0	0	0	0	0	0	0	0	0	0
ENSMUSG00000100180	Gm28140	0	0	0	0	0	0	0	0	0	0
ENSMUSG00000060424	Pantr1	0	0	0	0	0.024628601	0	0	0.020688514	0	0
ENSMUSG00000045515	Pou3f3	0.001815222	0.003135095	0	0	0	0.011822595	0	0	0	0
ENSMUSG00000099784	Dalir	0	0	0	0	0	0	0	0	0	0
ENSMUSG00000060679	Mrps9	0.43071766	0.523456448	0.365131683	0.57299102	0.674480736	0.433882636	0.299205081	0.597608957	0.554719714	0.438341806
ENSMUSG00000041907	Gpr45	0.018231582	0.019097916	0.01195191	0.004964731	0.020116191	0.016607047	0	0	0.076825464	0
ENSMUSG00000070939	Tgfbrap1	0.27103856	0.263074493	0.203114443	0.155543171	0.319130387	0.373222428	0.281860268	0.231190955	0.420246429	0.211909278
ENSMUSG00000100269	Gm28782	0	0	0.002752982	0	0	0	0	0	0	0
ENSMUSG00000041878	8430432A02Rik	0.022349314	0.022331704	0.028575124	0	0.033206206	0	0	0	0.055363322	0
ENSMUSG00000010290	AI597479	0.11973941	0.135806445	0.111263182	0.078754945	0.157858442	0.154531207	0.065174607	0.263456116	0.071214234	0.076042334
ENSMUSG00000008136	Fhl2	2.050509972	2.3888079	1.892452922	4.712214642	2.071727048	1.963151012	2.311356767	2.533369288	2.615233364	1.4526461
ENSMUSG00000099576	Gm29040	0	0	0	0	0	0	0	0	0	0
ENSMUSG00000066877	Nck2	0.283244591	0.346136101	0.211749738	0.271330309	0.260774512	0.347175068	0.33392515	0.50945084	0.645046014	0.251551837
ENSMUSG00000026051	Ecrg4	0.079194385	0.022934353	0.031720197	0.153348174	0.299056635	0.4245353	0.523999522	0.32844783	4.42160434	0.026890684
ENSMUSG00000100764	Gm29155	0	0.001494329	0.009371658	0	0	0	0	0	0	0
ENSMUSG00000100635	Gm29157	0.003971048	0	0	0	0	0	0	0	0	0
ENSMUSG00000100480	Gm29156	0	0	0	0	0	0	0	0	0	0
ENSMUSG00000057363	Uxs1	0.312250056	0.232701109	0.316498801	0.279122902	0.44999949	0.355480335	0.269275266	0.220278409	0.565964493	0.431643542
ENSMUSG00000041763	Tpp2	1.03656388	1.184831769	0.921600592	0.663675259	0.927440381	0.888809452	1.138562264	1.062613146	1.093737254	1.210474687
ENSMUSG00000047343	Mettl21c	0.033483524	0.037064885	0.016906844	0.00749204	0.060760155	0.055753478	0.090196403	0.040411225	0.048105833	0
ENSMUSG00000091844	Gm8251	0.025494852	0.007125378	0.001977956	0	0	0.015419677	0	0	0	0
ENSMUSG00000026049	Tex30	0.081368948	0.056821054	0.073960602	0.056586919	0.029073237	0.060539991	0.014011902	0	0.124187085	0.159521099
ENSMUSG00000026047	Poglut2	0.231365067	0.154681212	0.263346288	0.169700919	0.208594036	0.245450474	0.136012785	0.190027647	0.299808787	0.382354759
ENSMUSG00000041684	Bivm	0.171359322	0.165607239	0.148461855	0.163597466	0.047635518	0.179240892	0.203476162	0.207588361	0.127759342	0.098609875
ENSMUSG00000026048	Ercc5	0.521978926	0.490200883	0.520438747	0.249880232	0.558067405	0.289139887	0.496484058	0.30245449	0.410578164	0.374128935
ENSMUSG00000046828	Mettl21e	0.001266226	0.001506523	0.003170527	0	0	0	0	0	0	0
ENSMUSG00000056870	Gulp1	4.941636927	5.433713704	3.411243552	2.731431029	5.938852925	4.145501656	6.669279105	4.589664733	5.876560879	3.880040974
ENSMUSG00000101701	4930521E06Rik	0.039001998	0.083254104	0.023087943	0.026509465	0.039230335	0.035476416	0.0837723	0.048313739	0	0.110627514
ENSMUSG00000026043	Col3a1	21.80165719	14.86938776	21.84061044	19.51704722	24.24263436	31.89220968	16.3805921	15.20681861	10.67414504	18.47438812
ENSMUSG00000026042	Col5a2	6.741843044	6.206840311	6.196194442	4.512165757	6.798253252	9.065159564	6.019668024	5.326075573	9.368191741	6.610647543
ENSMUSG00000025995	Wdr75	0.339362975	0.305157315	0.239635479	0.244571317	0.251663071	0.321732232	0.260480362	0.373852947	0.469730324	0.432654387
ENSMUSG00000098549	Gm5269	0	0	0	0	0	0	0	0	0	0
ENSMUSG00000025993	Slc40a1	0.254601024	0.167988065	0.123614992	0.224952985	0.15077728	0.158760159	0.150614032	0.137905638	0.367647693	0.2184214
ENSMUSG00000041144	Dnah7b	0.383776651	0.39276793	0.314298242	0.194436486	0.620477655	0.338865108	0.434433644	0.220918922	0.201871523	0.233377413
ENSMUSG00000101337	Dnah7c	0.034706584	0.029040056	0.026385657	0	0.032934115	0	0.04924745	0	0	0.053677247
ENSMUSG00000025986	Slc39a10	0.759223353	0.66471727	0.660355077	0.494460787	0.467853583	0.649574605	0.632756938	0.679536521	0.693479655	0.470345072
ENSMUSG00000100213	Gm28151	0.0151266	0.008958244	0.015907574	0	0.020671202	0.050899739	0.030087455	0.037713971	0	0
ENSMUSG00000101447	Gm28826	0	0	0	0	0	0	0	0	0	0
ENSMUSG00000051616	C230029F24Rik	0	0	0	0	0	0	0	0	0	0
ENSMUSG00000099608	4933411E06Rik	0	0	0	0	0	0	0	0	0	0
ENSMUSG00000100451	Gm29665	0	0	0	0	0	0	0	0	0	0
ENSMUSG00000100816	Gm28321	0	0	0	0	0	0	0	0	0	0
ENSMUSG00000026109	Tmeff2	0.063373268	0.052171202	0.454740424	0.113665004	2.710540932	0.3331409	0.527971498	0.387090551	0.028424232	0.073548294
ENSMUSG00000100671	Gm28322	0	0	0	0	0	0	0	0	0	0
ENSMUSG00000101242	Gm28319	0	0	0.002337855	0	0	0	0	0	0	0
ENSMUSG00000099625	Gm29325	0	0	0	0	0.013769098	0	0	0	0	0
ENSMUSG00000101799	9330175M20Rik	0.116225383	0.104586584	0.129400496	0.115913511	0.632249448	0.050512478	0.242489795	0.927960634	0.402811404	0.084167908
ENSMUSG00000045954	Cavin2	0.664406654	0.601140546	0.70230148	1.098746925	0.74425933	0.440168102	0.975441341	2.218359468	0.742738539	0.738362303
ENSMUSG00000101702	1700072G22Rik	0	0	0	0	0	0	0	0	0	0
ENSMUSG00000026107	Nabp1	0.056909934	0.079214369	0.076827305	0.07014153	0.029836635	0.043519199	0.049600114	0.048162133	0.270814548	0.081227868
ENSMUSG00000099413	Gm17767	0	0	0	0	0.024628601	0	0	0.024429808	0	0
ENSMUSG00000101741	Gm28055	0.016607857	0.015888303	0.0034594	0	0.030086408	0.01185261	0	0.05527197	0.127652259	0.070178519
ENSMUSG00000018417	Myo1b	0.422270685	0.638469783	0.220675594	0.262889716	0.131759814	0.445366334	0.189754185	1.125504534	0.07838148	2.495401062
ENSMUSG00000062939	Stat4	0.001380572	0.001741073	0	0.013349706	0	0	0	0	0.044125758	0
ENSMUSG00000109599	Gm31812	0.001342785	0.017236591	0.005877065	0.005879265	0	0.01185261	0.012514493	0	0	0
ENSMUSG00000026104	Stat1	0.632946534	0.721761217	0.55737857	0.616041787	0.758935047	0.596868646	0.462389054	0.688758328	0.536767073	2.072641652
ENSMUSG00000026103	Gls	2.32684985	2.717103172	2.217718006	1.52830315	2.754715291	2.405188021	3.058294834	2.115310417	2.784224872	3.168588078
ENSMUSG00000002881	Nab1	0.926941223	1.027368321	0.860831507	0.598457776	1.128131207	0.887553748	1.162091312	0.767288633	0.664006646	1.1227809
ENSMUSG00000100120	Gm553	0.056039272	0.036357999	0.027745674	0.019879512	0.133919367	0.090510133	0.109461006	0	0.035296713	0.092707966
ENSMUSG00000099878	Gm28178	0.004680667	0	0	0	0	0	0.013725122	0	0	0.024309016
ENSMUSG00000043015	Nemp2	0.100289324	0.090876423	0.091068075	0.080113123	0.170716419	0.027755712	0.071551793	0.131608269	0.121747146	0
ENSMUSG00000041439	Mfsd6	0.33280464	0.249895074	0.291410751	0.221007221	0.523525881	0.46483168	0.518299494	0.553823215	0.332807916	0.232766375
ENSMUSG00000026102	Inpp1	0.275116191	0.299880295	0.350531811	0.247905518	0.520831169	0.300731411	0.190131354	0.402083835	0.508264525	0.502483351
ENSMUSG00000041426	Hibch	0.427203011	0.490173945	0.420292051	0.55873493	0.471961553	0.365719826	0.65226378	0.505433657	0.396927057	0.305939749
ENSMUSG00000043629	1700019D03Rik	0.179744267	0.156495348	0.521943129	0.191118649	0.376011726	0.289142604	0.170609874	0.164736511	0.150238906	0.118063486
ENSMUSG00000026100	Mstn	0	0.004672306	0	0	0	0	0	0	0	0
ENSMUSG00000060715	1700019A02Rik	0.002919208	0.006858745	0.006188143	0.008274166	0	0	0.017284919	0	0.021150033	0.04991988
ENSMUSG00000026098	Pms1	0.166077414	0.221699839	0.19676968	0.111308908	0.253150183	0.105970542	0.15683373	0.059977636	0.236729679	0.01850084
ENSMUSG00000100763	Gm28777	0.005800102	0.006260529	0	0	0	0.012045087	0	0	0.055536272	0
ENSMUSG00000026097	Ormdl1	0.047981398	0.059258352	0.085711229	0.102197222	0.013540228	0.068535766	0.035883735	0.043658129	0	0.02830648
ENSMUSG00000100679	Gm28778	0	0.002040453	0.003173772	0	0.018193462	0	0	0	0	0
ENSMUSG00000026096	Osgepl1	0.203926547	0.253130558	0.164287349	0.220055158	0.160902909	0.190972083	0.23747517	0.077496104	0.189578557	0.097804311
ENSMUSG00000099913	Gm28551	0.061552598	0.059671073	0.048702952	0.014011875	0	0.014238443	0.08442549	0	0.145246932	0.053317566
ENSMUSG00000026095	Asnsd1	0.16080278	0.183894801	0.133811597	0.211064173	0.064944337	0.220486407	0.146976497	0.087314342	0.247476354	0.264659743
ENSMUSG00000117809	Gm50478	0	0	0	0	0	0	0	0	0	0
ENSMUSG00000096141	Dnah7a	0.005119481	0.013400734	0	0	0.066939682	0	0	0	0	0
ENSMUSG00000026094	Stk17b	0.132357264	0.135959967	0.089822505	0.195813034	0.265175098	0.148758274	0.432111433	0.193347824	1.5266513	0.087631935
ENSMUSG00000042807	Hecw2	0.183153945	0.167354779	0.404430732	0.266042643	1.042772439	0.686222209	1.238459425	0.988136482	3.235565531	1.162219242
ENSMUSG00000025983	Ccdc150	0.006558089	0.013300415	0.017919925	0	0.014848604	0.015803481	0.017319796	0.025411152	0.031891569	0
ENSMUSG00000041303	Gtf3c3	0.325222754	0.269006715	0.300714385	0.257759084	0.241784676	0.289156174	0.401782625	0.237627797	0.114657563	0.345753902
ENSMUSG00000109809	Gm34066	0	0	0	0	0	0	0	0	0	0
ENSMUSG00000073678	Pgap1	0.160396995	0.133608776	0.153840055	0.103736167	0.201438737	0.066248793	0.377408005	0.304267984	0.114519616	0.074489431
ENSMUSG00000052331	Ankrd44	1.225591934	1.434995634	0.858260192	0.84009404	1.996872669	0.762992357	0.973875188	1.385045021	1.494275259	1.354602848
ENSMUSG00000101674	4930444A19Rik	0.478745626	0.585832972	0.356354692	0.26440395	0.739376342	0.396086921	0.371875263	0.399221362	0.629105035	0.457177773
ENSMUSG00000025982	Sf3b1	2.040099832	2.096253464	1.674424649	1.495504195	1.387512797	1.84768975	1.65032904	1.896164263	1.463184063	1.900764189
ENSMUSG00000025981	Coq10b	0.415381959	0.488432332	0.660486844	0.357058854	0.433805786	0.7511686	0.481291296	0.592559049	0.443184986	0.585868351
ENSMUSG00000025980	Hspd1	1.60632388	1.591319662	1.646933848	2.523565116	1.088401967	1.715459719	1.546257996	1.639864102	1.371189525	1.745235483
ENSMUSG00000073676	Hspe1	1.311533734	1.151922616	1.186540851	1.650640554	1.069183032	1.304674489	1.005028026	1.203109318	1.264290319	1.338982009
ENSMUSG00000025979	Mob4	0.716295937	0.684526496	0.724902765	0.625320547	0.831360323	0.651023742	0.838451885	1.101545365	0.5080818	0.683181441
ENSMUSG00000025978	Rftn2	0.351972709	0.485972666	0.282573909	0.154187713	0.410647929	0.306240919	0.564474096	0.252468868	0.937769708	0.232851846
ENSMUSG00000097649	Gm10561	0.061782642	0.091432091	0.0360584	0.029065513	0.144077072	0.097181603	0.090266118	0.016345211	0.122136227	0.086688508
ENSMUSG00000046994	Mars2	0.078151443	0.068848808	0.054710857	0.056719239	0.061901734	0.052206088	0.011662624	0.037540356	0	0.064492093
ENSMUSG00000025977	Boll	0.006505775	0.020030261	0.012305638	0	0	0.036096433	0	0.029482175	0	0.075201513
ENSMUSG00000038349	Plcl1	2.50710187	2.842113564	1.776198751	1.563062036	2.312365797	2.201602232	2.447384046	2.291750947	1.559899173	5.579357504
ENSMUSG00000099950	9130227L01Rik	0	0	0	0	0	0	0	0	0	0
ENSMUSG00000100372	1700003I22Rik	0	0	0	0	0	0	0	0	0	0
ENSMUSG00000101332	Gm28240	0	0	0	0	0	0	0	0	0	0
ENSMUSG00000045336	Hsfy2	0	0	0	0	0	0	0	0	0	0
ENSMUSG00000038331	Satb2	0.107127255	0.142569673	0.109824503	0.039129832	0.130778385	0.116713032	0.120408691	0.070422491	0.057224607	0.121236052
ENSMUSG00000099945	1700126A01Rik	0	0	0	0	0	0	0	0	0	0
ENSMUSG00000101429	BC055402	0	0	0	0	0	0	0	0	0	0
ENSMUSG00000097519	4930558J18Rik	0	0	0	0	0.007415581	0	0	0	0	0
ENSMUSG00000038323	1700066M21Rik	0.053552294	0.041766498	0.059375154	0.020992411	0	0.033310712	0.010870936	0	0.041710115	0.048866008
ENSMUSG00000048495	Tyw5	0.12208045	0.22316957	0.185729006	0.062359914	0.180959725	0.142897416	0.091508667	0.073483391	0.140455782	0.06041767
ENSMUSG00000025971	Maip1	0.179229901	0.212714713	0.182351082	0.338386457	0.109912158	0.194879352	0.236995472	0.203014303	0.280783304	0.261930876
ENSMUSG00000038305	Spats2l	0.488576816	0.672767893	0.516023838	0.47546184	0.671258237	0.514846408	0.71595261	0.615081915	1.836249377	0.633648862
ENSMUSG00000091283	Gm17234	0.011529585	0.007020506	0.002502643	0	0	0	0	0.078101692	0.10026721	0
ENSMUSG00000054770	Kctd18	0.322017863	0.363001305	0.328489822	0.225229368	0.319674468	0.326349623	0.210962367	0.35958927	0.221536175	0.452181411
ENSMUSG00000026039	Sgo2a	0.023575444	0.03696262	0.009971192	0.067758103	0.025636393	0.035358468	0.04469764	0	0	0
ENSMUSG00000063558	Aox1	1.063287156	1.042852484	0.864046806	0.6347262	1.463727304	0.542535405	1.557322312	0.922081607	0.903218208	0.658830409
ENSMUSG00000064294	Aox3	0.473546571	0.238551279	0.140575553	0.227770089	2.419842128	0.085344947	2.160679005	0.350309361	0.396282932	0.236648513
ENSMUSG00000038242	Aox4	0	0	0	0	0.012298308	0	0	0	0	0
ENSMUSG00000089822	Gm15759	0	0	0.003408694	0	0	0	0	0	0	0
ENSMUSG00000079554	Aox2	0.008037844	0.034282039	0.01920465	0.022883062	0	0	0	0	0	0
ENSMUSG00000051223	Bzw1	0.622507533	0.636130488	0.709087188	0.663601254	0.652885582	0.816989496	0.594201182	0.637065804	0.639080208	0.748033246
ENSMUSG00000026034	Clk1	1.490863601	1.702614824	1.311805309	0.702348955	1.286309604	1.097913539	1.809806368	1.476371605	1.335721944	1.207245217
ENSMUSG00000026035	Ppil3	0.241568801	0.261953239	0.221105318	0.149946328	0.145114954	0.185912476	0.127984468	0.202422234	0.401780388	0.181139181
ENSMUSG00000026036	Nif3l1	0.169663836	0.191256348	0.212714238	0.141348564	0.125454759	0.28125367	0.10216455	0.093136082	0.195213345	0.353003067
ENSMUSG00000026037	Orc2	0.308259038	0.402028315	0.319995082	0.255137356	0.310627874	0.287952211	0.349900223	0.422905572	0.568579909	0.405987679
ENSMUSG00000085054	Gm15834	0.056205795	0.047838535	0.045583932	0.042041126	0.032990826	0.026617107	0.040928172	0.016204304	0.131474427	0.068187326
ENSMUSG00000038174	Fam126b	0.478210722	0.453016771	0.358363136	0.390258559	0.355845726	0.504684371	0.574652354	0.505880581	0.284604767	0.496903178
ENSMUSG00000026032	Ndufb3	1.519619087	1.740165347	1.447330005	3.129543728	1.802090666	1.469837693	1.530044084	1.961872847	2.633239377	1.272447923
ENSMUSG00000047528	Flacc1	0.072218285	0.049051607	0.051333314	0.034681165	0.059129254	0.055509312	0.133579055	0	0.101020196	0
ENSMUSG00000026031	Cflar	1.07148876	1.176172837	0.895104323	0.770829375	1.025738274	0.873514546	0.878693849	1.338386392	0.81627879	1.11608807
ENSMUSG00000026029	Casp8	0.145117942	0.125040069	0.145951851	0.191247456	0.115651372	0.163702681	0.116915467	0.268782217	0.221203315	0.265072675
ENSMUSG00000026028	Trak2	0.455351665	0.562071125	0.524463349	0.608149646	0.593167008	0.571680306	0.379190991	0.422686167	0.813346791	0.528880616
ENSMUSG00000026027	Stradb	0.148461138	0.245111453	0.171358445	0.297540797	0.205948757	0.113580606	0.173001756	0.15673748	0.248927828	0.09052372
ENSMUSG00000072295	C2cd6	0	0	0	0	0	0	0	0	0	0
ENSMUSG00000047383	AC169382.1	0	0	0	0	0	0	0	0	0	0
ENSMUSG00000099752	Gm29018	0	0.004007566	0	0	0	0	0.052596146	0	0	0
ENSMUSG00000038079	Tmem237	0.302835696	0.284696185	0.482804731	0.261704804	0.233782803	0.386681068	0.404559937	0.333508125	0.659405628	0.253037326
ENSMUSG00000097573	G730003C15Rik	0.003940765	0.019017925	0.003564792	0	0	0	0	0	0.100502513	0
ENSMUSG00000079550	Mpp4	0.01842456	0.012957553	0.019986344	0	0	0.010548256	0	0	0	0.023409336
ENSMUSG00000101586	Gm29017	0.004339891	0.022053612	0.002118498	0.019670622	0	0	0.02121001	0	0.023269343	0
ENSMUSG00000026024	Als2	0.215516873	0.327751831	0.256569908	0.155929165	0.379025901	0.127129213	0.325567073	0.188262937	0.489125308	0.252339011
ENSMUSG00000026023	Cdk15	0	0.002190907	0.004358082	0	0.009594424	0	0	0	0	0
ENSMUSG00000099922	Gm29016	0	0	0	0	0	0	0	0	0	0
ENSMUSG00000041075	Fzd7	0.354831004	0.187083383	0.263355635	0.181061753	0.343907794	0.479509125	0.369273862	0.263432381	0.166012111	0.142763258
ENSMUSG00000097819	Gm26813	0.001521684	0	0.004328676	0	0	0	0	0	0	0
ENSMUSG00000047361	Gm973	0.009154274	0.014980535	0.002144876	0.010912968	0.053942741	0	0.076223468	0.024429808	0.064353328	0
ENSMUSG00000099811	Gm28411	0	0.003003003	0	0	0	0	0.011167956	0	0	0
ENSMUSG00000101409	1700122D07Rik	0	0	0	0	0	0	0	0	0	0
ENSMUSG00000026021	Sumo1	1.150257668	1.078548701	0.921853834	0.965927742	1.020838689	1.106382335	1.373580083	1.413427046	0.989986932	1.464737477
ENSMUSG00000026020	Nop58	0.333247425	0.391721506	0.372816691	0.311092644	0.268396596	0.443721999	0.335014054	0.347933539	0.1852609	0.40024967
ENSMUSG00000067336	Bmpr2	2.024493067	2.037879588	2.446083024	1.988140959	2.383577448	2.390135704	1.845282836	2.43473162	1.99521584	2.28629988
ENSMUSG00000041040	Fam117b	0.359201461	0.458629954	0.383075759	0.342276672	0.233069285	0.469695912	0.507856454	0.938132542	0.437405545	0.329344584
ENSMUSG00000026018	Ica1l	0.026459666	0.012402601	0.021944477	0.021450294	0.049261409	0.016223442	0	0	0.070171164	0.025528699
ENSMUSG00000026019	Wdr12	0.275117451	0.315741981	0.300216714	0.142876387	0.326593292	0.414012869	0.367093963	0.242694611	0.234593734	0.245536182
ENSMUSG00000026017	Carf	0.206344107	0.206237689	0.254691397	0.134459402	0.267781687	0.244820499	0.268809085	0.18904049	0.245249859	0.091940219
ENSMUSG00000073664	Nbeal1	2.993365193	3.745775555	2.837480468	2.350722391	3.21556014	2.946272131	3.444523264	3.221531969	3.596844147	4.362831443
ENSMUSG00000049439	Cyp20a1	1.020314489	0.964305802	0.918268673	0.964369258	0.842134791	0.95827582	1.363044054	0.882261775	0.705014169	0.586189865
ENSMUSG00000026782	Abi2	0.901076696	1.106263734	0.976782313	0.714125657	1.039521246	0.893457341	1.272449947	0.709288482	0.842141462	1.10191063
ENSMUSG00000026014	Raph1	2.306777791	2.777555975	2.456434005	1.813301515	2.541312529	3.030552342	4.677324302	2.506445396	4.540889245	3.160733189
ENSMUSG00000026012	Cd28	0.012337067	0.01857904	0.010238808	0.037089812	0.00792775	0.010320556	0	0	0	0.071273709
ENSMUSG00000086795	Gm11579	0	0	0	0	0	0	0	0	0	0
ENSMUSG00000085965	2310016D23Rik	0.004454523	0	0	0.004279364	0	0	0.02941635	0	0	0
ENSMUSG00000026011	Ctla4	0.007701529	0.011968628	0	0.005270614	0	0.01282979	0	0.072660035	0.021557532	0.077637601
ENSMUSG00000026009	Icos	0.008234969	0.003202862	0.010452263	0	0	0.010542651	0	0	0	0
ENSMUSG00000100893	Gm28083	0	0	0	0	0	0	0	0	0	0
ENSMUSG00000085248	Gm11587	0.002488084	0	0	0	0	0	0	0	0	0
ENSMUSG00000085447	9530026F06Rik	0	0	0	0	0	0	0	0	0	0
ENSMUSG00000086408	Gm11588	0	0	0	0	0	0	0	0	0	0
ENSMUSG00000100965	Gm28449	0	0	0	0	0	0	0	0	0	0
ENSMUSG00000086009	4930587A21Rik	0	0	0	0	0	0	0	0	0	0
ENSMUSG00000052062	Pard3b	5.79423437	7.183218104	5.976584154	3.606685077	8.67652052	5.676756864	5.15715112	6.561076732	6.147978092	5.580816453
ENSMUSG00000085842	Pard3bos1	1.893129304	2.302152992	2.221475502	1.335356026	2.170458734	2.059950251	1.55972621	1.977159105	1.468656793	2.054802866
ENSMUSG00000085019	Pard3bos2	0.002411374	0.003426	0.002698673	0	0	0	0	0	0	0
ENSMUSG00000085400	Pard3bos3	0.179437814	0.232845336	0.175421246	0.125780353	0.159200109	0.148414077	0.082366038	0.106306229	0.141833612	0.135789468
ENSMUSG00000100750	Gm29084	0	0	0	0	0	0	0	0	0	0
ENSMUSG00000025969	Nrp2	0.594943581	0.621781795	0.370599489	0.432543403	0.09375053	0.242546906	0.136280197	1.617651655	0.205875186	0.640002449
ENSMUSG00000100811	Gm29083	0.003025006	0.002399076	0	0.014021745	0	0	0	0	0	0
ENSMUSG00000100426	Gm4208	0	0	0	0	0	0	0	0	0	0
ENSMUSG00000040865	Ino80d	0.903615027	1.120283178	1.022517918	0.673067025	0.943089292	0.921607227	0.76171253	1.015065795	1.011965278	1.363672819
ENSMUSG00000084799	Ino80dos	0.376180964	0.497084462	0.372546588	0.197967303	0.544047873	0.224758566	0.414299084	0.430790131	0.532546454	0.357506257
ENSMUSG00000101599	Gm20342	0.210503281	0.233795273	0.215273063	0.103216192	0.172060862	0.157377634	0.15881846	0.259553924	0.348061684	0.239855914
ENSMUSG00000025968	Ndufs1	1.394716954	1.54635692	1.185296816	2.893150424	1.355110481	1.383311509	1.284236626	1.521834922	1.605799373	1.217740901
ENSMUSG00000025967	Eef1b2	1.440445871	1.396306752	1.544094462	2.273094746	1.539371889	1.651967457	1.248515026	1.146072992	1.149557203	1.63214696
ENSMUSG00000046856	Gpr1	0.022906458	0.02660976	0.11130201	0.005269054	0.020614306	0	0	0.0736714	0	0
ENSMUSG00000087561	Gm11608	0	0	0	0	0	0	0	0	0	0
ENSMUSG00000027520	Zdbf2	0.014636964	0.005484913	0.002166859	0.02454061	0.100516047	0	0	0.032886515	0	0
ENSMUSG00000025964	Adam23	0.081323066	0.016164994	0.02255193	0.03817263	0.507249883	0.008002125	0.033347673	0.034515026	0.091843865	0.025699542
ENSMUSG00000115378	Gm39653	0	0	0	0	0	0	0	0	0	0
ENSMUSG00000069085	Dytn	0	0.008463597	0	0	0	0	0	0	0	0
ENSMUSG00000025963	Mdh1b	0	0	0	0	0	0	0	0.031721058	0	0
ENSMUSG00000025962	Fastkd2	0.168652185	0.213053429	0.133079007	0.15278809	0.116313998	0.11321248	0.175743562	0.161187214	0.081166732	0.204342118
ENSMUSG00000025961	4933402D24Rik	0.029600782	0.0104986	0.012562037	0.010586679	0	0.051507865	0.01576725	0	0	0
ENSMUSG00000044689	Gm13749	0	0	0	0	0	0	0	0	0	0
ENSMUSG00000025959	Klf7	1.418030627	1.626882674	1.64477121	1.507984763	1.994463235	1.776375942	1.821748013	2.046793133	1.611508594	1.615211093
ENSMUSG00000086836	Gm13748	0.118959479	0.146272308	0.095622242	0.059269663	0.091183091	0.045951441	0.19036258	0.150416807	0.323808129	0.124330533
ENSMUSG00000101895	Gm28981	0.005398042	0.015793482	0.002821451	0.010387387	0.010360719	0	0.038457397	0	0	0
ENSMUSG00000025958	Creb1	0.928224193	0.961900407	0.90956665	0.624887978	1.026050837	0.931671135	0.889671673	1.089777289	0.676577844	0.961725527
ENSMUSG00000025956	Mettl21a	0.187906907	0.148215412	0.170129895	0.141405913	0.140982302	0.193895891	0.134719955	0.233946301	0.219607367	0.11751495
ENSMUSG00000101832	Gm28982	0.028259742	0.028201853	0.009669397	0.013007013	0	0	0.020393659	0	0	0
ENSMUSG00000100437	Gm29152	0.004375411	0	0.008294156	0	0.012398949	0	0.028707997	0	0	0
ENSMUSG00000070871	Ccnyl1	0.218057101	0.219834261	0.231611929	0.220018428	0.24575217	0.288699532	0.312670896	0.289844343	0.112626573	0.249470677
ENSMUSG00000045005	Fzd5	0.051524968	0.034320077	0.063933181	0.032793474	0.103942698	0.04672054	0.05522029	0.069922985	0.107232286	0.03614754
ENSMUSG00000051344	Plekhm3	0.575433223	0.671410851	0.527891969	0.38543841	0.665779862	0.548013123	0.771281348	0.500188285	0.67394238	0.570145521
ENSMUSG00000025955	Akr1cl	0.004240469	0.021956887	0.003831271	0.010783997	0.031245126	0	0.06762821	0	0	0
ENSMUSG00000070870	Cryge	0	0	0	0	0	0	0	0	0	0
ENSMUSG00000067299	Crygd	0	0	0	0	0	0	0	0	0	0
ENSMUSG00000025952	Crygc	0	0	0	0	0	0	0	0	0	0
ENSMUSG00000073658	Crygb	0	0	0	0	0	0	0	0	0	0
ENSMUSG00000044429	Cryga	0	0	0	0	0	0	0	0	0	0
ENSMUSG00000100846	Gm28845	0	0	0.002861374	0	0	0	0	0	0	0
ENSMUSG00000044816	D630023F18Rik	0	0	0	0	0	0	0	0	0	0
ENSMUSG00000025950	Idh1	0.481343967	0.368570197	0.453428294	0.365803935	0.486268893	0.359969557	0.40523965	0.520138771	0.259500503	0.182924339
ENSMUSG00000025949	Pikfyve	0.654986306	0.661678414	0.505128227	0.434684133	0.547636695	0.712167232	0.852428421	0.547483599	0.607412774	0.687960143
ENSMUSG00000025946	Pth2r	0.001653893	0.008841763	0	0	0	0	0	0	0	0
ENSMUSG00000025945	Crygf	0	0	0	0	0	0	0	0	0	0
ENSMUSG00000015222	Map2	0.554080965	0.846923388	0.257623289	0.379769536	0.352041472	0.446371093	0.19254346	0.238423611	0.383152337	0.642997357
ENSMUSG00000073656	Gm10558	0.010373117	0.027462645	0.006401218	0.007997121	0.020698791	0	0.01168485	0	0.051654415	0
ENSMUSG00000055567	Unc80	0.00398663	0.003255641	0.00390854	0	0.030086408	0	0	0	0	0
ENSMUSG00000026005	Rpe	0.154859545	0.19056643	0.176397819	0.147126471	0.206065895	0.206442127	0.245936174	0.197972825	0.156362074	0.325359671
ENSMUSG00000026004	Kansl1l	2.070666527	2.464734603	1.810943128	1.371026188	2.459523455	1.871281173	2.691056972	2.237150781	2.737070456	1.920870202
ENSMUSG00000026003	Acadl	2.974450221	3.479826867	2.708436364	6.607813567	2.700163098	2.667908265	2.774868835	3.749453323	3.950862823	2.715462491
ENSMUSG00000061816	Myl1	0.13233026	0.127135909	0.136357977	0.126013318	0.251244523	0.075447436	0.0709594	0.119154421	0.093030811	0.124245462
ENSMUSG00000026000	Lancl1	0.375380387	0.35020955	0.297474184	0.339062403	0.459497073	0.258009121	0.414095397	0.125875251	0.351813467	0.281469332
ENSMUSG00000025991	Cps1	0	0	0	0	0	0	0	0	0.054719562	0
ENSMUSG00000086204	Gm15668	0	0.001275919	0	0	0	0	0	0	0	0
ENSMUSG00000085075	Gm15669	0	0	0	0	0	0	0	0	0	0
ENSMUSG00000087329	Gm15671	0	0	0	0	0	0	0	0	0	0
ENSMUSG00000062209	Erbb4	0.065778085	0.150297702	0.06653501	0.861508847	0.17732781	0.077592324	1.321170329	0.765892429	39.00379361	0.01807377
ENSMUSG00000099804	Gm28497	0.002552816	0	0	0	0	0	0	0	0	0
ENSMUSG00000100354	Gm29113	0.00257106	0	0	0	0	0	0.019651307	0	0	0
ENSMUSG00000101156	Gm29114	0.038346742	0.044399462	0.052136433	0.016757642	0.029332356	0.031281748	0	0.040791281	0.14089876	0.023409336
ENSMUSG00000025997	Ikzf2	0.451932258	0.49950986	0.431905574	0.330856033	0.580003126	0.314936713	0.645629936	0.425690558	0.967462737	0.370719649
ENSMUSG00000053153	Spag16	0.002645419	0.005190637	0	0	0.020185872	0.007697874	0.030999245	0	0	0
ENSMUSG00000045648	Vwc2l	0	0.001514017	0	0	0	0	0	0	0	0
ENSMUSG00000026196	Bard1	0.053554333	0.045487707	0.053052698	0.033558671	0.058469863	0.054506535	0	0.0483335	0.060468632	0.032232279
ENSMUSG00000050296	Abca12	0.004237836	0.007611654	0.003711281	0	0	0	0	0	0	0
ENSMUSG00000026192	Atic	0.166815952	0.202507927	0.244425582	0.177345255	0.175085196	0.206276373	0.209554996	0.200862632	0.049230769	0.336192745
ENSMUSG00000026193	Fn1	0.404963072	0.227175983	2.885051514	1.064913802	1.772527947	2.13901145	0.638528239	0.759774122	1.882710695	1.034275036
ENSMUSG00000073652	Apol7d	0.006411993	0	0.005917134	0	0.040616994	0	0	0	0	0.02233938
ENSMUSG00000099707	Gm8883	0	0	0	0	0	0	0	0	0	0
ENSMUSG00000101211	Gm28818	0	0.002572239	0	0	0	0	0	0	0	0
ENSMUSG00000101848	4933417E11Rik	0	0	0	0	0	0	0	0	0	0
ENSMUSG00000101764	4930556G22Rik	0	0.001457203	0	0	0	0	0	0	0	0
ENSMUSG00000102123	Gm4319	0	0	0	0	0	0	0	0	0	0
ENSMUSG00000039395	Mreg	0.040463952	0.028107025	0.01521838	0.089203821	0.048875607	0	0.02941635	0.050694419	0	0.066993524
ENSMUSG00000026189	Pecr	0.111940858	0.121331961	0.105201587	0.046673613	0.171969498	0.122905754	0.293462433	0.066944262	0.229916584	0.088389377
ENSMUSG00000026188	Tmem169	0.023933722	0.023476302	0.017781595	0.005433988	0	0.017060421	0	0.02127732	0.054719562	0
ENSMUSG00000026187	Xrcc5	0.25283241	0.346979001	0.235486091	0.134445097	0.241438604	0.346899261	0.365717856	0.436316316	0.396420263	0.146994069
ENSMUSG00000039372	Marchf4	0	0	0	0	0	0	0.041069778	0	0	0.018611854
ENSMUSG00000039354	Smarcal1	0.139260585	0.094772131	0.118245697	0.088877066	0.111485024	0.069462951	0.159721614	0.116667892	0.123729256	0.140853662
ENSMUSG00000110712	Gm39662	0	0	0	0	0	0	0.027146398	0	0	0
ENSMUSG00000039342	Ankar	0.002388957	0	0	0	0	0	0	0	0	0
ENSMUSG00000046330	Rpl37a	2.870086241	2.584984573	3.016169676	4.93631378	2.322966653	3.356913936	2.656122559	2.896092839	3.251368262	2.801324819
ENSMUSG00000039323	Igfbp2	0	0.003122923	0	0	0	0	0	0	0	0
ENSMUSG00000026185	Igfbp5	0.477834145	0.774076316	0.513556476	1.597272898	3.375578457	1.881163621	1.765801254	0.915997344	3.086971312	0.844350416
ENSMUSG00000101968	1700027A15Rik	0	0	0	0	0	0	0	0	0.031891569	0
ENSMUSG00000026182	Tnp1	0	0	0	0	0	0	0	0	0	0
ENSMUSG00000101112	Gm29185	0	0	0	0.00749204	0	0	0	0	0	0
ENSMUSG00000099877	Pinc	0	0	0	0	0	0	0	0	0	0
ENSMUSG00000101812	D530049I02Rik	0	0	0	0	0	0	0	0	0	0
ENSMUSG00000100444	C530043A13Rik	0	0	0	0	0	0	0	0	0	0
ENSMUSG00000100429	Gm29186	0	0	0	0	0	0	0	0	0	0
ENSMUSG00000100301	6030407O03Rik	0.002931371	0.03078301	0.006237938	0.008874611	0.060172816	0	0	0	0	0.01864197
ENSMUSG00000101344	Gm29183	0	0	0	0	0	0	0	0	0	0
ENSMUSG00000055322	Tns1	1.63970219	1.65262884	1.736376229	2.355688358	2.408230549	1.707619005	2.343419554	2.157867997	2.233036174	2.141793346
ENSMUSG00000061815	Rufy4	0.00365627	0.003657441	0.004316624	0.00465192	0	0	0	0	0	0
ENSMUSG00000026180	Cxcr2	0	0	0	0.012504283	0	0	0	0	0	0
ENSMUSG00000048480	Cxcr1	0	0	0	0.006252141	0	0	0	0	0	0
ENSMUSG00000006304	Arpc2	0.982669536	1.107056309	1.208374304	0.984002287	1.018058254	1.215873039	0.993537323	1.645032207	0.932861504	0.789592459
ENSMUSG00000064272	Gpbar1	0	0	0	0	0	0	0	0	0	0
ENSMUSG00000006299	Aamp	0.449635718	0.365075145	0.280731398	0.629119389	0.362596088	0.585659076	0.395991597	0.149484656	0.314415045	0.262356559
ENSMUSG00000101503	Gm28364	0	0	0	0	0	0	0	0	0	0
ENSMUSG00000026179	Pnkd	0.540665725	0.574579851	0.54770441	0.636153673	0.338535673	0.433143393	0.384911189	0.67102439	0.795017394	0.742931908
ENSMUSG00000006301	Tmbim1	0.825211978	0.619370748	1.017102075	0.662928732	0.448089079	0.992050889	0.817630655	0.838394446	1.054862445	0.680427762
ENSMUSG00000073650	Catip	0.043532327	0.040720754	0.033319465	0.012335247	0.058320761	0.024518097	0.081038671	0.029870363	0.050793651	0.01850084
ENSMUSG00000026177	Slc11a1	0.006509183	0.012419954	0.01009586	0.041225731	0	0	0.013496369	0	0.037011335	0.045382758
ENSMUSG00000026176	Ctdsp1	0.271592934	0.258142231	0.30702537	0.258288675	0.151191186	0.225483518	0.251817478	0.272617745	0.259806334	0.195632972
ENSMUSG00000026175	Vil1	0.011832371	0.021966111	0.009915789	0	0	0	0	0.017290269	0	0
ENSMUSG00000033364	Usp37	0.755307855	0.916811221	0.81463153	0.551052826	0.764556514	0.66483408	0.848054058	0.711399802	0.820092505	1.129744538
ENSMUSG00000026174	Cnot9	0.215626194	0.268906546	0.157596142	0.120140648	0.284577317	0.204736797	0.180123318	0.241664743	0.135581434	0.333791218
ENSMUSG00000026173	Plcd4	0.053785157	0.081155182	0.046588497	0.038313545	0.12442165	0.025181496	0.032433954	0.094092875	0.034707158	0
ENSMUSG00000026135	Zfp142	0.221620007	0.249133997	0.167652829	0.237308745	0.260192017	0.195790929	0.304456321	0.242450978	0.134160294	0.250498423
ENSMUSG00000026172	Bcs1l	0.153166315	0.189741635	0.184233855	0.140782069	0.169256055	0.047115921	0.162362186	0.177015545	0.251920903	0.128141428
ENSMUSG00000026171	Rnf25	0.33203896	0.35764931	0.301903423	0.140537506	0.402064733	0.300713868	0.394711972	0.124211466	0.273996216	0.42508037
ENSMUSG00000033276	Stk36	0.031440548	0.014913197	0.028982875	0.01334051	0.009941939	0.021266098	0.015954816	0	0.050682805	0
ENSMUSG00000033257	Ttll4	0.435567246	0.511215905	0.381766547	0.27788535	0.466001659	0.276386106	0.353638809	0.432669901	0.24479099	0.372484144
ENSMUSG00000026170	Cyp27a1	3.749595818	3.175504549	2.082382287	1.900245838	3.252287707	1.362865995	2.184924893	1.62736076	1.02436668	2.259749564
ENSMUSG00000006542	Prkag3	0.038769078	0.011904921	0.016117995	0.039248478	0.016573523	0	0.019070631	0.02608106	0.065544528	0
ENSMUSG00000033227	Wnt6	0.122740762	0.049197158	0.033868539	0.078031617	0.073672113	0.010647314	0.061265391	0.094922804	0	0.045293547
ENSMUSG00000099472	Gm29539	0	0	0	0	0	0	0	0	0	0
ENSMUSG00000026167	Wnt10a	0	0	0	0	0	0	0	0	0	0
ENSMUSG00000090071	Cdk5r2	0.002005818	0	0	0	0	0	0	0	0	0
ENSMUSG00000055197	Fev	0	0	0	0	0	0	0	0	0	0
ENSMUSG00000006546	Cryba2	0	0	0	0	0	0	0	0	0	0
ENSMUSG00000047021	Cfap65	0	0	0	0	0	0	0	0	0	0
ENSMUSG00000089653	Gm15841	0	0	0	0	0	0	0	0	0	0
ENSMUSG00000006538	Ihh	0	0	0	0	0	0	0	0	0	0
ENSMUSG00000026162	Nhej1	0.093119842	0.095295365	0.074990648	0.080234723	0.126173362	0.085413255	0.031726524	0.111519109	0.075388097	0.046264132
ENSMUSG00000026205	Slc23a3	0.007679454	0.013279427	0	0.005459833	0	0	0	0	0	0
ENSMUSG00000033159	Cnppd1	0.228580955	0.235259973	0.266488474	0.29160284	0.291417794	0.337507956	0.284896522	0.234388455	0.094590255	0.398580364
ENSMUSG00000049339	Retreg2	0.317411247	0.301180467	0.408622908	0.271929273	0.233365981	0.318310662	0.324362596	0.325097553	0.212465895	0.266092063
ENSMUSG00000026197	Zfand2b	0.150992306	0.12799854	0.144523025	0.118788826	0.12243941	0.101635256	0.02184844	0.111108226	0.265667607	0.174876931
ENSMUSG00000026198	Abcb6	0.083610247	0.067873787	0.088650463	0.092258285	0.039837624	0.065082607	0.090773665	0.023329601	0.059392437	0.095543921
ENSMUSG00000033124	Atg9a	0.24783451	0.239555732	0.237677806	0.26262388	0.243095634	0.159005845	0.200307855	0.221660271	0.16416952	0.085401799
ENSMUSG00000026199	Ankzf1	0.145784982	0.145909296	0.089770143	0.160736854	0.133856765	0.043243855	0.188171436	0.023222546	0.189764597	0
ENSMUSG00000026200	Glb1l	0.14540599	0.143103504	0.141457315	0.100789497	0.275275199	0.184338706	0.132157449	0.183963769	0.199212039	0.152624568
ENSMUSG00000026201	Stk16	0.209796751	0.230194096	0.193533654	0.194641908	0.200336893	0.29634593	0.114413053	0.188974068	0.249302094	0.186800773
ENSMUSG00000026202	Tuba4a	0.679833854	0.78161362	0.676359846	1.378949049	0.777441132	0.499343921	0.613069788	0.987543317	0.713208446	0.527766352
ENSMUSG00000096094	A630095N17Rik	0	0.001538424	0	0	0.020185872	0	0	0	0	0
ENSMUSG00000026203	Dnajb2	0.364229801	0.40546991	0.377665799	0.306618862	0.399088163	0.39214263	0.279111837	0.332955168	0.278369859	0.577961816
ENSMUSG00000026204	Ptprn	0.048658868	0.041912468	0.04507467	0.06216052	0.03282696	0.0674314	0.081507628	0.024205104	0.128097912	0.024460164
ENSMUSG00000101840	Gm28294	0	0	0	0	0	0	0	0	0	0
ENSMUSG00000033061	Resp18	0	0	0	0	0	0	0	0	0	0
ENSMUSG00000100556	Gm28902	0	0	0	0	0	0	0	0	0	0
ENSMUSG00000026209	Dnpep	0.213681515	0.354446532	0.367547182	0.228961154	0.285231351	0.371674438	0.270609861	0.215187336	0.137685553	0.411979453
ENSMUSG00000026208	Des	2.287903502	2.706860631	1.936463437	6.582303793	2.374207831	2.173048789	2.308575032	3.100198235	3.09353201	2.240988218
ENSMUSG00000085653	Gm15179	0	0.003817377	0	0	0	0	0	0	0	0
ENSMUSG00000026207	Speg	0.184166193	0.250653977	0.162100401	0.431138866	0.232130419	0.137146166	0.194818345	0.316241115	0.250847432	0.248088333
ENSMUSG00000086053	Gm15178	0.00334208	0.008944602	0.012919203	0.008373456	0.020721438	0	0	0	0	0
ENSMUSG00000033021	Gmppa	0.274649584	0.35258759	0.196983237	0.141590639	0.269585367	0.145226058	0.173243714	0.399968027	0.215923071	0.084851084
ENSMUSG00000033007	Asic4	0.00373753	0	0.002252379	0	0	0	0	0	0	0
ENSMUSG00000032997	Chpf	0.531907244	0.309586517	0.589048737	0.642110478	0.311227435	0.891293261	0.498021646	0.386995325	0.547787937	0.549689908
ENSMUSG00000026211	Obsl1	0.264943772	0.290136262	0.19009325	0.203975006	0.397673139	0.254496788	0.303960967	0.222810288	0.09557945	0.144628411
ENSMUSG00000051703	Tmem198	0.013483612	0.027003287	0.001883062	0	0.03369795	0.017558646	0.008415383	0	0.02994012	0.017198797
ENSMUSG00000032968	Inha	0.052494434	0.049110307	0.045594135	0.005449799	0.131870729	0.024697798	0.047890622	0.016204304	0.072508234	0.14662863
ENSMUSG00000026213	Stk11ip	0.064039928	0.065504272	0.049203061	0.045620732	0.082510232	0.008748355	0.035084057	0.066701253	0	0
ENSMUSG00000006576	Slc4a3	0.522543185	0.474327374	0.550430014	0.946314905	0.346315898	0.474466488	0.272836859	0.471534099	0.332337692	0.428300654
ENSMUSG00000099996	Gm29065	0	0	0	0	0	0	0	0	0	0
ENSMUSG00000100827	Gm29069	0	0.003813337	0	0	0	0	0	0	0	0
ENSMUSG00000100553	Gm17751	0	0	0	0	0	0	0	0	0	0
ENSMUSG00000100534	Gm816	0	0	0	0	0	0	0	0	0	0
ENSMUSG00000026235	Epha4	0.810636875	0.837253525	0.316584839	0.523622237	0.821852361	0.457025475	0.508244769	0.76300724	0.710346397	0.727268477
ENSMUSG00000101849	Gm28386	0	0	0	0	0	0	0	0	0	0
ENSMUSG00000102052	Gm28387	0	0	0	0	0	0	0	0	0	0
ENSMUSG00000004872	Pax3	0.010318594	0.004707885	0.006806407	0	0	0	0	0	0.300281514	0
ENSMUSG00000032908	Sgpp2	0	0.012137332	0.001962516	0	0	0	0	0.031508369	0	0
ENSMUSG00000099561	Gm28410	0	0	0	0	0	0	0	0	0	0
ENSMUSG00000026245	Farsb	0.331602805	0.475798495	0.317584793	0.267069996	0.315049636	0.327203442	0.426025511	0.357532591	0.431956518	0.470488241
ENSMUSG00000090486	BC035947	0	0	0	0	0	0	0	0	0	0
ENSMUSG00000012187	Mogat1	0.004612067	0	0	0	0	0	0	0	0	0
ENSMUSG00000099364	5730419F03Rik	0	0	0	0	0	0	0	0	0	0
ENSMUSG00000100562	Gm29611	0	0	0	0	0	0	0	0	0	0
ENSMUSG00000032883	Acsl3	0.339313196	0.358944774	0.394477324	0.311650237	0.257431705	0.233740104	0.168909784	0.213274825	0.062196597	0.570136008
ENSMUSG00000079470	Utp14b	0.048439301	0.065279527	0.041884322	0.028355325	0.071397546	0.085960798	0.081388224	0.048162133	0.025023459	0.074311169
ENSMUSG00000099706	Gm29536	0.013322005	0.027024801	0.016449999	0	0.017139723	0.048009339	0.01473595	0.047088839	0.053249145	0.073380493
ENSMUSG00000047330	Kcne4	0.045173123	0.043956539	0.019098695	0.04835333	0.026721972	0.06380121	0.119453134	0.015523708	0.03873242	0.186917226
ENSMUSG00000101324	Gm29187	0	0	0	0	0	0	0	0	0	0
ENSMUSG00000050711	Scg2	0	0	0	0	0	0	0	0	0	0
ENSMUSG00000054702	Ap1s3	0	0.004248914	0	0.013562191	0	0	0	0	0	0
ENSMUSG00000073643	Wdfy1	0.267965653	0.279067959	0.326763905	0.233299827	0.286465563	0.240218968	0.281203406	0.071216067	0.302933719	0.129581943
ENSMUSG00000026248	Mrpl44	0.117554887	0.148612918	0.129483006	0.161287876	0.191523322	0.085696173	0.109172567	0.08456602	0.1516597	0.338741408
ENSMUSG00000026249	Serpine2	3.246277673	1.868120451	4.760262826	2.980510538	1.789137573	3.85869279	1.993884368	2.737089464	0.824734999	2.666268797
ENSMUSG00000099552	9830004L10Rik	0	0	0	0	0	0	0	0	0	0
ENSMUSG00000043230	Fam124b	0.001745643	0	0	0	0.016584408	0	0	0.043489319	0	0
ENSMUSG00000101257	2310015K22Rik	0.002607709	0	0	0	0	0	0	0	0	0
ENSMUSG00000004364	Cul3	1.441024598	1.673496063	1.377713307	1.605597763	1.593437466	1.464548231	1.581847885	1.29356991	1.463636649	1.821430519
ENSMUSG00000101722	Gm29125	0	0	0	0	0	0	0	0	0	0
ENSMUSG00000101483	1700016L21Rik	0	0	0	0	0	0	0	0	0	0
ENSMUSG00000110100	Gm45261	0	0	0	0	0	0	0	0	0	0
ENSMUSG00000038608	Dock10	1.278479006	2.071587777	0.522339572	0.771154771	0.732906523	1.133791834	1.346056302	0.639256336	1.298289543	1.541551263
ENSMUSG00000054976	Nyap2	0	0	0	0	0	0	0	0	0	0.023484322
ENSMUSG00000055980	Irs1	0.827675473	1.080344593	0.765211954	0.680411503	1.450314716	0.791056614	0.792096642	0.477987781	1.999982639	0.49056615
ENSMUSG00000022591	Gm9747	0.023378895	0.016018091	0.014016579	0.008369518	0.050992077	0.014527747	0.019142933	0.067012672	0	0
ENSMUSG00000026142	Rhbdd1	0.36770032	0.457404733	0.363237989	0.220807755	0.441577473	0.514017152	0.50331491	0.336057241	0.343883915	0.370724522
ENSMUSG00000100786	Gm28940	0.068570211	0.078176814	0.049132474	0.016831656	0.030297154	0.031376671	0.112232699	0.023504635	0.07071506	0.076496482
ENSMUSG00000067158	Col4a4	3.126313341	2.859209668	2.78705723	2.140808141	3.435753091	4.769159133	2.596164649	2.119501405	0.962843633	2.635477122
ENSMUSG00000079465	Col4a3	1.318624256	1.586453696	1.116645269	0.876214533	1.549513364	3.074067424	1.472865482	1.148016541	0.378775308	1.41983846
ENSMUSG00000026150	Mff	0.659108719	0.776838253	0.613730017	0.757232301	0.68285442	0.647339266	0.593770205	0.924551076	0.800512475	0.585761869
ENSMUSG00000026149	Tm4sf20	0.004729253	0.012962957	0.009960875	0.006435296	0	0	0.013017426	0.065559465	0.047100383	0
ENSMUSG00000114299	Gm47791	0	0	0	0	0	0	0	0	0	0
ENSMUSG00000100170	Gm28942	0	0	0	0	0	0	0	0	0	0
ENSMUSG00000026159	Agfg1	0.733499048	0.843556596	0.984578741	0.566210707	0.885396863	0.982944217	0.997474054	0.693359257	0.764474933	0.835236274
ENSMUSG00000113880	A030005L19Rik	0.004281952	0.001209588	0.005812653	0	0	0	0	0	0	0
ENSMUSG00000113973	A030014E15Rik	0	0	0	0	0	0	0	0	0	0
ENSMUSG00000113846	Gm6217	0	0	0	0	0	0	0	0	0	0
ENSMUSG00000113084	A030003K21Rik	0	0	0	0	0	0	0	0	0	0
ENSMUSG00000113925	Gm7544	0	0	0	0	0	0	0	0	0	0
ENSMUSG00000114011	Gm47955	0	0	0	0	0	0	0	0	0	0
ENSMUSG00000113097	Gm47959	0	0	0	0	0	0	0	0	0	0
ENSMUSG00000038496	Slc19a3	0.001981151	0.001754091	0.002483269	0	0	0	0.050583274	0	0	0.022351763
ENSMUSG00000100190	Krtap28-10	0	0	0	0	0	0	0	0	0	0
ENSMUSG00000113267	Gm47969	0	0	0	0	0	0	0	0	0	0
ENSMUSG00000104423	A030005K14Rik	0	0	0	0	0	0	0	0	0	0
ENSMUSG00000101315	Krtap28-13	0	0	0	0	0	0	0	0	0	0
ENSMUSG00000026166	Ccl20	0	0	0	0	0	0	0	0	0	0
ENSMUSG00000053161	Daw1	0	0	0	0	0	0	0	0	0	0
ENSMUSG00000026163	Sphkap	0.155366388	0.120941476	0.038871561	0.100615925	0.271498051	0.021203026	0.025216484	0	0.424032453	0.032524768
ENSMUSG00000100580	4933436I20Rik	0.004794238	0.020507552	0.022773286	0	0.107084897	0	0	0	0	0
ENSMUSG00000045658	Pid1	6.706237305	6.209891037	3.723037079	3.551720314	15.32725881	4.301988656	7.091378564	4.097283841	5.611277969	5.940662157
ENSMUSG00000036766	Dner	0.003897698	0.009927528	0.004778412	0.015641195	0.129185802	0	0	0.023371039	0	0.024309016
ENSMUSG00000026219	Trip12	2.079122947	2.270227212	2.043747156	1.847464608	2.540649382	1.765032253	1.925300031	2.180191407	2.929563366	2.378862305
ENSMUSG00000073633	Fbxo36	0.127577172	0.143767273	0.122077458	0.046667966	0.11392282	0.13145258	0.111528416	0.024447965	0.272066958	0.235715989
ENSMUSG00000026220	Slc16a14	0.003652558	0.008666139	0.008124947	0	0	0	0	0.020872295	0	0
ENSMUSG00000118590	AC167036.1	0	0.001921061	0	0	0	0	0	0	0	0
ENSMUSG00000052477	C130026I21Rik	0.032210909	0.0487016	0.029536425	0.034269291	0.056545812	0.034544755	0.030646601	0.088873412	0	0.118474712
ENSMUSG00000118640	AC167036.2	0	0	0	0	0	0	0	0	0	0
ENSMUSG00000089844	A530032D15Rik	0.00468826	0.00611737	0.023243695	0.004937864	0	0	0	0.017485574	0	0
ENSMUSG00000073631	Gm10553	0	0.003317991	0	0	0	0	0.028746453	0	0	0
ENSMUSG00000072109	A530040E14Rik	0	0	0	0	0	0	0	0	0	0
ENSMUSG00000079457	Gm7609	0	0.011263731	0.003281244	0.013141502	0	0.008161773	0	0	0	0
ENSMUSG00000090252	Gm16028	0.002835419	0.001662424	0.003235029	0	0.012976632	0	0.016128694	0.020872295	0	0
ENSMUSG00000089652	Gm16025	0.002156074	0.004479357	0	0	0	0	0	0	0	0
ENSMUSG00000118591	AC147806.1	0	0.002057227	0	0	0	0	0	0	0	0
ENSMUSG00000089714	Gm16092	0	0.002727358	0	0	0.030086408	0	0	0	0	0
ENSMUSG00000118607	AC147806.2	0.019710081	0.040628397	0.050783729	0.085308797	0.060172816	0.010759908	0.040032575	0	0	0.098986195
ENSMUSG00000094127	G530012D18Rik	0.004926946	0	0	0	0	0	0	0	0	0
ENSMUSG00000070034	Sp110	0.287039531	0.353502866	0.27758416	0.2758125	0.228949358	0.192648477	0.436723028	0.248758789	0.31425747	0.82749591
ENSMUSG00000090103	Gm16094	0	0.002042303	0	0	0	0	0	0	0	0
ENSMUSG00000070031	Sp140	0.192288326	0.221434783	0.21666564	0.244861784	0.45758096	0.164731241	0.272600156	0.176749117	0.365323	0.67091927
ENSMUSG00000073628	Gm10552	0.042654073	0.025544645	0.03211561	0.026098044	0.02167312	0.02336287	0.020584391	0	0	0.088788077
ENSMUSG00000090246	Gm17017	0.010387495	0.008561204	0.009996184	0	0.017593492	0.012163231	0	0.033101622	0	0.035386205
ENSMUSG00000026222	Sp100	1.360882349	1.781907765	1.269766482	0.814781292	1.024805084	1.044390919	1.585826192	2.166484993	0.706553023	4.184998581
ENSMUSG00000052760	A630001G21Rik	0.071885652	0.085469359	0.023236572	0.065177593	0.022268541	0.0706523	0.113234549	0.069964424	0.093022729	0.182048258
ENSMUSG00000100217	9930111H07Rik	0	0	0	0	0	0	0	0	0	0
ENSMUSG00000036707	Cab39	0.834988762	0.867448631	0.846500192	0.764958593	0.809065714	0.638465396	0.752929028	0.715041094	0.684751079	0.843685496
ENSMUSG00000026223	Itm2c	1.630130517	0.938716192	1.44586202	1.592878936	0.9131586	1.930610116	1.210148097	1.336049586	0.938741047	1.146691627
ENSMUSG00000026224	4933407L21Rik	0	0.001842484	0	0	0	0	0	0	0	0
ENSMUSG00000099767	Gm28884	0	0.00457961	0	0	0	0	0	0	0	0
ENSMUSG00000049608	Gpr55	0	0.004572173	0	0	0	0	0	0	0	0
ENSMUSG00000100108	Gm28100	0	0	0	0	0	0	0	0	0	0
ENSMUSG00000026226	Spata3	0	0	0	0	0	0	0	0	0	0
ENSMUSG00000026227	2810459M11Rik	0.003584626	0	0	0	0	0	0	0	0	0
ENSMUSG00000026229	Psmd1	0.956131813	0.999675798	0.960487306	1.208065727	0.735314773	0.902361892	1.042815719	0.868938195	0.736053172	1.028025218
ENSMUSG00000026228	Htr2b	0.134093405	0.170522963	0.121820953	0.174891697	0.304442386	0.172514798	0.157190573	0.246047652	0.06576177	0.158992413
ENSMUSG00000094638	Gm21972	0.03910101	0.046580175	0.068667995	0.096180511	0.090198278	0.072269428	0.053945757	0.076289966	0	0.121396396
ENSMUSG00000062590	Armc9	0.210387686	0.264562479	0.206092632	0.120286634	0.234647341	0.258266169	0.261701853	0.09854007	0.345084363	0.204325827
ENSMUSG00000087538	Gm16341	0.004324826	0.00817148	0.003642257	0.006867462	0	0	0.01336191	0	0	0
ENSMUSG00000079445	B3gnt7	0	0	0	0	0	0	0	0	0	0
ENSMUSG00000099644	Gm28626	0	0	0	0	0	0	0	0	0	0
ENSMUSG00000026234	Ncl	1.482185724	1.569055074	1.455073725	1.973661949	1.423971202	1.852518292	1.674412762	1.880610571	1.608911663	1.885384707
ENSMUSG00000026237	Nmur1	0.003189512	0	0.010383701	0	0	0	0	0	0	0
ENSMUSG00000036574	Tex44	0	0	0	0	0	0	0	0	0	0
ENSMUSG00000026238	Ptma	3.734860516	3.177385791	4.11603646	4.97785257	2.605475195	5.598816042	3.922770128	3.989368776	5.616203447	4.706419506
ENSMUSG00000026239	Pde6d	0.338126771	0.354236343	0.379862602	0.232520629	0.413672966	0.268018179	0.346000485	0.391582308	0.458945262	0.211877027
ENSMUSG00000026240	Cops7b	0.112639093	0.155573207	0.133776671	0.108536294	0.068025598	0.108063247	0.30322674	0.104183259	0.027826087	0.079065012
ENSMUSG00000026241	Nppc	0.004479152	0.005800554	0.031570556	0	0.010665575	0.04165992	0	0	0	0.037061195
ENSMUSG00000053333	Dis3l2	1.32192797	1.370551002	1.148102498	0.795351134	1.748844557	1.080562702	1.373596251	1.202696553	2.098285987	1.035119407
ENSMUSG00000099401	Gm28375	0.408581661	0.600069931	0.530050907	0.382415392	0.594000979	0.364641572	0.330045203	0.347742162	0.576666066	0.495058266
ENSMUSG00000101625	Gm29371	0	0.003191967	0	0	0	0	0	0	0	0
ENSMUSG00000026246	Alppl2	0	0	0	0	0	0	0	0	0	0
ENSMUSG00000079440	Alpi	0	0	0	0	0	0	0	0	0	0
ENSMUSG00000036500	Akp3	0	0	0	0	0	0	0	0	0	0
ENSMUSG00000099839	Gm29374	0	0	0	0	0	0	0	0	0	0
ENSMUSG00000026247	Ecel1	0.003448341	0	0	0	0	0	0	0	0	0
ENSMUSG00000036480	Prss56	0	0	0	0	0	0	0	0	0	0
ENSMUSG00000026251	Chrnd	0	0	0	0	0	0	0	0	0	0
ENSMUSG00000026253	Chrng	0.009081498	0.011596826	0.003095616	0.008839341	0	0.010438653	0	0	0	0
ENSMUSG00000026254	Eif4e2	0.35921593	0.398654745	0.426802534	0.374861535	0.435915851	0.379197482	0.349317241	0.492975113	0.188313717	0.332629582
ENSMUSG00000026255	Efhd1	0.082217929	0.173797792	1.041572405	0.111585288	0.288169639	0.262931382	0.129134805	0.126070005	0	0.106275448
ENSMUSG00000089821	Efhd1os	0	0	0	0	0	0	0	0	0	0
ENSMUSG00000048000	Gigyf2	1.183390328	1.300826655	1.037687775	0.671923423	1.534318305	0.831779653	1.245218837	1.275613951	1.603151435	1.413982673
ENSMUSG00000079436	Kcnj13	0.15845709	0.182725332	0.162836028	0.139377024	0.264371785	0.187493403	0.116627924	0.097484168	0.278130536	0.19701306
ENSMUSG00000026258	Snorc	0	0	0	0	0	0	0	0	0	0
ENSMUSG00000026259	Ngef	0.007745448	0.013872122	0.014049554	0	0.020721438	0.080229453	0.041174317	0.033101622	0.047100383	0.01583762
ENSMUSG00000079434	Neu2	0	0	0.002865781	0	0.020116191	0	0	0	0	0
ENSMUSG00000026288	Inpp5d	0.016381167	0.028237443	0.014477566	0.125890147	0.07946357	0.059361889	0	0.223516569	0.070902459	0
ENSMUSG00000026289	Atg16l1	0.487769981	0.649341344	0.562702738	0.27440302	0.434755927	0.272257999	0.579102044	0.339192712	0.490258505	0.569472227
ENSMUSG00000056055	Sag	0.05874243	0.034767944	0.018781729	0.004594267	0.011811284	0.025432382	0.079238002	0.058514245	0.099296676	0
ENSMUSG00000070738	Dgkd	0.292504632	0.373063738	0.15796393	0.277879429	0.325751616	0.325295507	0.226178382	0.315793994	0.375018881	0.348219703
ENSMUSG00000101942	Gm19582	0	0	0	0	0	0	0	0	0	0
ENSMUSG00000005501	Usp40	0.750680447	0.9224772	0.645579612	0.575959387	0.938212165	0.600763513	0.806797579	0.548296331	0.663104069	0.602161319
ENSMUSG00000090165	Ugt1a10	0	0	0	0	0	0	0	0	0	0
ENSMUSG00000090175	Ugt1a9	0	0	0	0	0	0	0	0	0	0
ENSMUSG00000089675	Ugt1a8	0	0	0	0	0	0	0	0	0	0
ENSMUSG00000090124	Ugt1a7c	0.003892183	0.004078369	0	0.00798277	0.040588435	0	0	0	0	0
ENSMUSG00000090145	Ugt1a6b	0	0	0	0	0	0.021785638	0	0	0	0
ENSMUSG00000054545	Ugt1a6a	0.008586601	0.003400139	0.005240747	0.00798277	0.026670645	0	0.028357089	0	0	0
ENSMUSG00000089943	Ugt1a5	0	0	0	0	0	0	0	0	0	0
ENSMUSG00000090171	Ugt1a2	0	0	0	0	0	0	0	0	0	0
ENSMUSG00000081984	Dnajb3	0.006192482	0.01371513	0	0	0.016775371	0	0	0	0	0
ENSMUSG00000089960	Ugt1a1	0	0	0	0	0	0	0	0	0	0
ENSMUSG00000079429	Mroh2a	0.018835315	0.031849169	0.007718489	0	0.012831568	0.029232459	0.033199	0.04403814	0	0.05364332
ENSMUSG00000044783	Hjurp	0.84807595	0.989858087	0.769353374	0.537572413	0.822970564	0.63208003	0.960516713	0.546226115	0.803901052	0.69330771
ENSMUSG00000036251	Trpm8	0.002003956	0	0.009105287	0	0	0	0	0	0	0
ENSMUSG00000085420	4930453O03Rik	0	0	0	0	0.009415558	0	0	0	0	0
ENSMUSG00000026295	Spp2	0	0	0	0	0	0	0	0	0	0
ENSMUSG00000099553	Gm29538	0	0	0	0	0	0	0	0	0	0
ENSMUSG00000100908	Gm28888	0	0	0	0	0	0	0	0	0	0
ENSMUSG00000062310	Glrp1	0	0	0	0.011565547	0	0	0	0	0	0
ENSMUSG00000100798	Gm19589	0	0	0	0	0	0	0	0	0	0
ENSMUSG00000100367	Gm29336	0	0	0	0	0	0	0	0	0	0
ENSMUSG00000049866	Arl4c	0.025627141	0.066391238	0.034065779	0.039305036	0.103592578	0.098690677	0.042748257	0.020633362	0.053067993	0.066453268
ENSMUSG00000097398	Platr5	0	0	0	0	0	0	0	0	0	0
ENSMUSG00000099848	Gm29337	0	0	0	0	0	0	0	0	0	0
ENSMUSG00000099378	1700067G17Rik	0	0	0	0	0	0	0	0	0	0
ENSMUSG00000036206	Sh3bp4	0.174593427	0.208647263	0.179090036	0.093035111	0.232712516	0.226536897	0.185792473	0.325604553	0.24085839	0.272966401
ENSMUSG00000101288	Gm28342	0	0	0	0	0	0	0	0	0	0
ENSMUSG00000099938	C030007H22Rik	0	0	0.00319174	0	0	0	0	0	0	0
ENSMUSG00000055013	Agap1	1.70824524	2.231030611	2.589448484	1.465701794	1.395652623	1.912632244	0.854740264	1.980409709	0.992587941	2.026488197
ENSMUSG00000034486	Gbx2	0	0	0	0	0	0	0	0	0	0
ENSMUSG00000067081	Asb18	0.009457308	0.03095041	0.033667777	0.046923721	0	0.036227168	0	0	0	0
ENSMUSG00000026301	Iqca	0	0	0.00246877	0	0	0	0	0	0	0
ENSMUSG00000100850	4930434B07Rik	0	0	0	0	0	0	0	0	0	0
ENSMUSG00000044337	Ackr3	2.087988082	1.868535288	9.066071411	1.910901687	2.935701055	3.486280776	0.79448698	3.226932242	0.372272548	2.13229043
ENSMUSG00000101951	Gm28721	0.001114551	0.003226339	0.007328741	0	0	0	0	0	0	0
ENSMUSG00000101028	Gm28723	0.007948615	0.001046391	0.01983838	0	0	0.010381305	0.013725122	0.05137234	0	0
ENSMUSG00000101997	Gm28722	0	0.003471412	0.006281111	0	0	0	0	0	0	0
ENSMUSG00000034432	Cops8	0.401498247	0.34537938	0.348198596	0.385099013	0.47585996	0.301990861	0.333661009	0.327754511	0.316323629	0.510737644
ENSMUSG00000056128	Gm9991	0	0.004206672	0	0	0	0	0	0	0	0
ENSMUSG00000048126	Col6a3	5.854088195	5.299019919	3.374637026	4.444076997	1.841132674	5.74158337	2.681700835	2.893848047	2.858150629	5.902621491
ENSMUSG00000026303	Mlph	0.00857524	0.011827462	0.002282219	0	0.060172816	0.030091748	0.090558984	0.038953164	0.107120955	0.045293547
ENSMUSG00000090550	Prlh	0	0	0	0	0	0	0	0	0	0
ENSMUSG00000026304	Rab17	0.001608541	0	0	0.005851231	0	0	0	0	0	0
ENSMUSG00000100791	Gm28199	0	0	0	0	0	0	0	0	0	0
ENSMUSG00000026305	Lrrfip1	0.450434501	0.613916643	0.372266376	0.59122151	0.492149423	0.537736058	0.474808396	0.871756862	0.912746116	0.748695445
ENSMUSG00000070732	Rbm44	0	0	0	0	0	0	0	0	0.056002846	0
ENSMUSG00000034353	Ramp1	0.240701216	0.169719586	0.273742977	0.286504297	0.247902573	0.199391476	0.029692986	0.141233038	0.138047412	0.053152766
ENSMUSG00000034343	Ube2f	0.344011498	0.379936449	0.39079463	0.495033645	0.388733019	0.357956224	0.3797756	0.264564158	0.541110888	0.522422855
ENSMUSG00000026307	Scly	0.197365989	0.331509779	0.231125978	0.156072891	0.255100253	0.196179507	0.148915685	0.257929569	0.243602612	0.442253836
ENSMUSG00000090322	Gm17090	0.123342161	0.153423382	0.079635428	0.033527484	0.051261754	0.078254838	0.056109671	0.104751284	0.081850416	0.208875116
ENSMUSG00000049515	Espnl	0	0	0	0	0	0	0	0	0	0
ENSMUSG00000026308	Klhl30	0.028055908	0.05425342	0.035422071	0.111346426	0.012070997	0.039769452	0.034789394	0.073394097	0.088713921	0
ENSMUSG00000047443	Erfe	0	0	0	0	0	0	0	0	0	0
ENSMUSG00000026309	Ilkap	0.639049417	0.616896994	0.614996793	0.542774496	0.745675583	0.525318258	0.685443574	0.625850914	0.422679513	0.697966919
ENSMUSG00000100253	1700020N18Rik	0	0	0	0	0	0	0	0	0	0
ENSMUSG00000067071	Hes6	0.107986824	0.07959131	0.084300767	0.057026635	0.043140545	0.012127916	0.083580158	0.076377051	0.091166904	0.044437013
ENSMUSG00000055866	Per2	0.47761845	0.558806586	0.343876838	0.256265311	0.497524904	0.355122273	0.36907039	0.497248598	0.321570121	0.306927069
ENSMUSG00000100151	Gm28382	0	0	0	0	0	0	0	0	0	0
ENSMUSG00000034292	Traf3ip1	0.098344179	0.133697386	0.119962092	0.084377529	0.098116077	0.146058511	0.095378505	0.122600579	0.114552359	0.124597895
ENSMUSG00000026311	Asb1	0.115401954	0.097613126	0.093992945	0.105342362	0.07770986	0.072747298	0.091693049	0.109294456	0.021557532	0.172141356
ENSMUSG00000101705	Gm28380	0	0	0	0	0	0	0	0	0	0
ENSMUSG00000100980	Gm29100	0.004963535	0.00192599	0.015254928	0	0	0	0.052449462	0	0	0.019256247
ENSMUSG00000007805	Twist2	0.179044486	0.278657033	0.257828609	0.171309963	0.659571143	0.25728276	0.407965735	0.176048389	0.187363657	0.074585954
ENSMUSG00000026313	Hdac4	0.551247934	0.653598975	0.724805577	0.605998849	0.825136285	0.608416843	0.607463579	0.692119778	1.632721627	0.532374047
ENSMUSG00000101265	Gm29099	0	0	0	0	0	0	0	0	0	0
ENSMUSG00000026260	Ndufa10	1.148597407	1.514562836	1.19301233	2.783285142	1.00620184	0.938291604	1.227854536	1.973911492	1.334580345	1.055126579
ENSMUSG00000067064	Olfr1416	0	0	0	0	0	0	0	0	0	0
ENSMUSG00000057464	Olfr1415	0	0	0	0	0	0	0	0	0	0
ENSMUSG00000042849	Olfr1414	0	0	0	0	0	0	0	0.023755	0	0
ENSMUSG00000058904	Olfr1413	0	0	0	0	0	0	0	0	0	0
ENSMUSG00000097001	1700054K02Rik	0	0	0	0	0	0	0	0	0	0
ENSMUSG00000046300	Olfr1412	0	0	0	0	0	0	0	0	0	0
ENSMUSG00000062497	Olfr1411	0	0	0	0	0	0	0	0	0	0
ENSMUSG00000063583	Olfr1410	0	0	0	0	0	0	0	0	0	0
ENSMUSG00000061616	Olfr12	0	0	0	0	0	0	0	0	0	0
ENSMUSG00000073616	Cops9	0.428918327	0.422523384	0.487022304	0.703608975	0.42452622	0.565376553	0.635409795	0.429147689	0.408134389	0.312920075
ENSMUSG00000044055	Otos	0	0	0	0	0	0	0	0	0	0
ENSMUSG00000100546	Gm29483	0	0	0	0	0	0	0	0	0	0
ENSMUSG00000099665	Gm29482	0	0	0	0	0	0	0	0	0	0
ENSMUSG00000100781	Gm29481	0	0.002432238	0.002487253	0	0	0	0	0	0	0
ENSMUSG00000034220	Gpc1	0.182473074	0.240213302	0.169294064	0.657150889	0.264117984	0.334444838	0.148708462	0.149791038	0.493059881	0.091714593
ENSMUSG00000101995	Gm29480	0	0.002374791	0	0	0	0	0.023542762	0	0	0
ENSMUSG00000034212	Ankmy1	0.039406556	0.056019789	0.041965638	0.106693942	0.040811508	0.044661897	0.037352876	0	0.207323649	0.059326209
ENSMUSG00000047067	Dusp28	0.047307428	0.04562565	0.064542913	0.129133241	0.05303914	0.01940941	0.061702918	0.058792336	0.063864898	0.07696012
ENSMUSG00000097251	5033417F24Rik	0.019628597	0.015023335	0.010333554	0	0.019159731	0	0.023803913	0.031721058	0	0.073877392
ENSMUSG00000026269	Rnpepl1	0.343056006	0.384829991	0.333249799	0.272452173	0.305179424	0.264249134	0.283505749	0.447065354	0.27728916	0.225154695
ENSMUSG00000100632	9430060I03Rik	0.056406575	0.045751088	0.057608558	0.053069719	0.047281821	0.074948932	0.089201437	0.023157154	0.055729711	0.111894745
ENSMUSG00000026270	Capn10	0.099778215	0.229751547	0.127254947	0.135777153	0.197044845	0.102742179	0.094049259	0.031500825	0.130894986	0.141981946
ENSMUSG00000026271	Gpr35	0.003887969	0.01124906	0.013132644	0	0.034393412	0	0.033674739	0	0	0.020341824
ENSMUSG00000045091	Aqp12	0	0.003670555	0	0	0	0	0	0	0	0
ENSMUSG00000014602	Kif1a	0.018542034	0.010359809	0.061268909	0.061367882	0.073823062	0.116058902	0.058721879	0.025391538	0.094149737	0.044777991
ENSMUSG00000101378	Gm28086	0	0	0	0	0	0	0	0	0	0
ENSMUSG00000026272	Agxt	0	0	0	0	0	0	0	0	0	0
ENSMUSG00000034159	Mab21l4	0	0	0	0	0	0	0	0	0	0
ENSMUSG00000084989	Crocc2	0.002070063	0.001678781	0	0	0	0	0	0	0.021150033	0
ENSMUSG00000047793	Sned1	0.681718209	0.438999326	0.541331806	0.50253144	0.862692601	0.161725208	1.780045297	0.8276468	1.445450919	0.156345289
ENSMUSG00000026273	Mterf4	0.13953254	0.164979322	0.144969761	0.105730778	0.178005798	0.214474295	0.257242656	0.23172435	0.203319934	0.082582118
ENSMUSG00000101172	Gm28535	0.00581295	0	0.009123147	0	0.010670081	0	0.026362687	0	0	0
ENSMUSG00000026274	Pask	0.005048906	0.009289866	0.008468176	0	0.016646358	0.031937658	0.025283331	0	0	0
ENSMUSG00000026275	Ppp1r7	0.264759487	0.277985449	0.247956782	0.362946816	0.191818311	0.203449206	0.237133543	0.356694117	0.327152071	0.446473915
ENSMUSG00000034107	Ano7	0.001088694	0	0	0	0	0	0	0	0	0
ENSMUSG00000034088	Hdlbp	2.129600236	2.266592505	2.323529034	2.750648514	2.000300565	2.236308788	2.144305384	2.597215704	1.818856332	2.243148462
ENSMUSG00000026276	Septin2	0.162952952	0.166434239	0.15994588	0.167998677	0.088509969	0.285028097	0.065419067	0.260893698	0	0.115691744
ENSMUSG00000116048	Septin2	0	0	0	0	0	0	0	0	0	0
ENSMUSG00000034066	Farp2	0.387803571	0.599233272	0.438672473	0.334494774	0.371828055	0.532735784	0.322746697	0.488558909	0.470544831	0.300649412
ENSMUSG00000026277	Stk25	0.397258167	0.523421026	0.411482686	0.403166528	0.523176666	0.297641875	0.486037922	0.412880054	0.516832195	0.607655368
ENSMUSG00000100927	Gm28536	0	0	0	0	0	0	0.016673836	0	0	0
ENSMUSG00000026278	Bok	0.129559137	0.094251497	0.22376155	0.186640242	0.214588097	0.167357772	0.26262626	0.209588406	0.045135507	0.150561121
ENSMUSG00000026279	Thap4	0.140640287	0.167170759	0.139114986	0.120256461	0.252809072	0.154315114	0.167480977	0.020872295	0.155503445	0.196167619
ENSMUSG00000101952	Gm10550	0.076201671	0.116704461	0.107786862	0.038920223	0.145586197	0.122998344	0.062893653	0.20903067	0.080802436	0.208884882
ENSMUSG00000026280	Atg4b	0.218021612	0.328912916	0.3055391	0.347082725	0.384376474	0.312206269	0.195090235	0.309494652	0.442030415	0.23017504
ENSMUSG00000026281	Dtymk	0.374745732	0.322164259	0.307329982	0.31612784	0.12855559	0.248398062	0.426846592	0.138038709	0.356225012	0.374103495
ENSMUSG00000026283	Ing5	0.183348634	0.17016123	0.17722321	0.164988051	0.132173089	0.137485575	0.186956725	0.215942714	0.126151922	0.271670538
ENSMUSG00000073609	D2hgdh	0.164923997	0.148277664	0.155130198	0.084383603	0.232768087	0.079769327	0.155799405	0.164781632	0.258880625	0.118238124
ENSMUSG00000094651	Gal3st2	0	0.009625072	0.006369034	0	0.011111407	0.013401736	0.101350856	0	0.077564099	0
ENSMUSG00000093805	Gal3st2b	0	0.006409369	0.00311427	0.046918832	0.011111407	0.038485495	0.064404672	0.022099252	0.431241388	0
ENSMUSG00000073608	Gal3st2c	0.012038086	0.014088384	0.008032708	0.051833948	0.033973003	0	0.037415339	0.02899492	0.140859456	0
ENSMUSG00000034000	Neu4	0	0.003204684	0	0	0	0	0	0	0	0
ENSMUSG00000026285	Pdcd1	0	0	0	0	0	0	0	0	0	0
ENSMUSG00000100518	4930440C22Rik	0	0	0	0	0	0	0	0	0	0
ENSMUSG00000051185	Fam174a	0.513923263	0.457031478	0.63114883	0.790261227	0.43166479	0.634860932	0.509720505	0.372402868	0.59127436	0.315683285
ENSMUSG00000040710	St8sia4	0.02524272	0.016891294	0.0226026	0.112884052	0.034045112	0.015131569	0	0.742040199	0.082209643	0.093675335
ENSMUSG00000100777	4930598F16Rik	0	0	0	0	0	0	0	0	0	0
ENSMUSG00000100062	1700063A18Rik	0	0	0	0	0	0	0	0	0	0
ENSMUSG00000100336	Gm29601	0	0	0	0	0.009882282	0	0	0	0	0
ENSMUSG00000100589	4930533P14Rik	0.001797088	0	0	0	0	0	0	0	0	0
ENSMUSG00000040693	Slco4c1	0	0.00221156	0	0	0	0	0	0	0	0
ENSMUSG00000097814	Panct2	0	0	0	0	0	0	0	0	0	0
ENSMUSG00000100454	Gm28901	0	0.001973582	0	0	0	0	0	0	0	0
ENSMUSG00000026331	Slco6c1	0	0	0	0	0	0	0	0	0	0
ENSMUSG00000044768	D1Ertd622e	0.04374697	0.071088109	0.06999092	0.021324417	0.086203283	0.08593984	0.031833646	0.120156018	0.042300066	0.031373336
ENSMUSG00000040648	Ppip5k2	0.482676471	0.57337653	0.458250068	0.4526171	0.373295603	0.320605625	0.461202608	0.531267366	0.600117348	0.369100249
ENSMUSG00000026333	Gin1	0.249623646	0.268220677	0.248482072	0.203223308	0.252572004	0.173954333	0.249997749	0.319788459	0.185301438	0.083626346
ENSMUSG00000026335	Pam	7.464750789	7.215900521	8.268964654	9.309782181	7.293938013	14.81012915	7.039728378	7.987219	14.65395981	8.803949056
ENSMUSG00000100182	1810006J02Rik	0	0	0	0	0.02477357	0	0	0.015523708	0	0
ENSMUSG00000100711	Gm29461	0	0	0	0	0	0	0	0	0	0
ENSMUSG00000026336	Slco6d1	0	0.001507128	0	0	0	0	0	0	0	0
ENSMUSG00000100009	Gm7967	0.004160874	0.003764297	0.004841179	0	0	0	0.013725122	0	0	0
ENSMUSG00000067028	Cntnap5b	0.008637371	0.006780179	0.005824187	0.006628271	0.026731678	0.023034845	0	0	0	0
ENSMUSG00000100684	Gm20268	0	0	0	0	0	0	0	0	0	0
ENSMUSG00000099375	Gm28187	0.002394256	0.004148092	0	0	0.038693437	0	0	0	0	0
ENSMUSG00000050840	Cdh20	0.001515914	0	0.003071595	0.006446954	0	0.022898176	0	0.019732896	0	0
ENSMUSG00000089866	Gm15699	0	0	0	0	0	0	0	0	0	0
ENSMUSG00000099669	Gm29012	0	0	0	0	0	0	0	0	0	0
ENSMUSG00000047496	Rnf152	0.022863983	0.029643998	0.009972107	0.057313595	0.135571536	0.025354365	0.041768942	0.03494216	0.187265509	0.059221065
ENSMUSG00000097482	Gm17634	0.005849707	0.00237981	0.004101554	0.017968733	0	0	0	0	0.033119437	0
ENSMUSG00000056536	Pign	0.979522597	1.140638683	0.787173586	0.566176049	1.10298336	0.831560464	1.267646794	0.957767096	0.944207667	0.870784902
ENSMUSG00000026319	Relch	1.090640369	1.362910942	0.986612111	0.69691766	1.318066923	0.843469407	1.117356742	1.057020236	1.231931305	1.019138453
ENSMUSG00000026321	Tnfrsf11a	0.007539168	0.014429772	0.007427868	0.030417856	0.120345633	0	0.058392456	0.10746564	0.037011335	0.032232279
ENSMUSG00000099843	Gm7160	0.12922199	0.1346687	0.125365541	0.050340323	0.117620451	0.157311643	0.115701059	0.108041234	0.098548277	0.129976981
ENSMUSG00000038866	Zcchc2	0.298429408	0.304789345	0.234578554	0.192564444	0.209186753	0.318397557	0.429499928	0.394118844	0.361585631	0.351770333
ENSMUSG00000101583	Gm20753	0.001986255	0.011772766	0.008752027	0.009659932	0	0.023890752	0.00930986	0.02139843	0	0
ENSMUSG00000044340	Phlpp1	1.49901935	1.554783595	1.724933063	0.820824308	2.020528547	1.011691576	1.522726935	2.340496214	1.152996652	1.425964385
ENSMUSG00000100247	A530053M12Rik	0	0	0	0	0	0	0	0	0	0
ENSMUSG00000057329	Bcl2	1.8528408	1.781611122	0.860624317	1.125761283	1.932634267	1.477127765	1.714503582	1.984367917	1.813202285	1.546878837
ENSMUSG00000054006	D630008O14Rik	0.057027038	0.060058074	0.048448934	0.025904855	0.071637849	0.089018362	0.060130119	0.069949728	0.103012364	0
ENSMUSG00000009905	Kdsr	0.343624458	0.272214503	0.316684261	0.256718628	0.388245688	0.397224562	0.395367784	0.171970218	0.539228968	0.168749167
ENSMUSG00000009907	Vps4b	0.630602079	0.644479099	0.648905496	0.594260922	0.620456706	0.529014702	0.555881507	0.603986835	0.753497024	0.73208824
ENSMUSG00000067006	Serpinb5	0	0	0	0	0	0	0	0	0	0
ENSMUSG00000059956	Serpinb12	0	0	0	0	0	0	0	0	0	0
ENSMUSG00000048775	Serpinb13	0	0	0	0	0	0	0	0	0	0
ENSMUSG00000044594	Serpinb3a	0	0	0	0	0	0	0	0	0	0
ENSMUSG00000058017	Serpinb3d	0	0	0	0	0	0	0	0	0	0
ENSMUSG00000073602	Serpinb3b	0	0.002435394	0.004903704	0	0	0	0	0	0	0
ENSMUSG00000073601	Serpinb3c	0	0	0	0	0	0	0	0	0	0
ENSMUSG00000026327	Serpinb11	0	0	0	0	0	0	0	0	0	0
ENSMUSG00000087210	Gm15391	0	0	0	0	0	0	0	0	0	0
ENSMUSG00000067001	Serpinb7	0	0.003014256	0.002516182	0	0	0	0	0	0	0
ENSMUSG00000062345	Serpinb2	0	0	0	0	0	0	0	0	0	0
ENSMUSG00000026315	Serpinb8	0.014641882	0.029060782	0.057285241	0.016038838	0.043805636	0.046746152	0.023452708	0.050160411	0.055567342	0
ENSMUSG00000086161	Gm15389	0	0	0	0	0	0	0	0	0	0
ENSMUSG00000100457	D830032E09Rik	0.025436181	0.04451477	0.0304475	0.052790902	0.021725492	0.025613475	0.014985494	0.023371039	0.136566489	0.01864197
ENSMUSG00000026312	Cdh7	0	0	0	0	0	0	0.01168485	0	0	0
ENSMUSG00000047216	Cdh19	2.733065937	2.550976896	1.700595564	1.036250436	1.029551711	1.462318141	1.771523849	1.289763044	0.659586165	1.500869082
ENSMUSG00000101253	Gm29088	0.006053183	0	0	0	0	0	0	0	0	0
ENSMUSG00000038702	Dsel	0.749753213	0.723004045	1.03874791	0.357424734	0.666617017	0.95113214	0.529910642	0.415310332	0.549470779	0.89781028
ENSMUSG00000101453	Gm28189	0	0	0	0	0	0	0	0	0	0
ENSMUSG00000097648	9330185C12Rik	0.002998141	0.002559959	0	0	0	0	0	0	0	0
ENSMUSG00000070695	Cntnap5a	0.003753304	0.004003292	0.007790766	0	0.018599945	0.013451708	0	0	0	0.052836364
ENSMUSG00000094429	Gm19965	0	0.00296505	0	0	0	0	0	0	0.031891569	0
ENSMUSG00000107979	Zfp813-ps	0	0	0	0	0	0	0	0	0	0
ENSMUSG00000100265	Gm28363	0	0	0	0	0	0	0	0	0	0
ENSMUSG00000101303	B020011L13Rik	0	0	0	0	0	0	0	0	0	0
ENSMUSG00000100305	Gm28360	0	0	0	0	0	0	0	0	0	0
ENSMUSG00000101415	Gm28168	0	0	0	0	0	0	0	0	0	0
ENSMUSG00000100617	Gm7145	0	0	0	0	0	0	0	0	0	0
ENSMUSG00000102030	Gm29106	0	0	0	0	0	0	0	0	0	0
ENSMUSG00000026374	Tsn	0.727284885	0.619001758	0.735533566	0.748219805	0.516202028	0.794934092	0.635314668	0.501359572	0.490843115	0.610152641
ENSMUSG00000026377	Nifk	0.144925707	0.11168887	0.155037429	0.179536313	0.169168689	0.204549854	0.091700059	0.050421089	0.06302521	0
ENSMUSG00000099936	Gm28867	0.00232264	0	0	0	0	0	0	0	0	0.021810727
ENSMUSG00000064302	Clasp1	1.067260531	1.414884144	1.36295395	1.621301852	1.331082144	1.16689115	0.943714749	1.027204871	1.876841444	0.911925015
ENSMUSG00000107722	2900060B14Rik	0.016555665	0.022856167	0.032211283	0.028191453	0.020864951	0	0.008415383	0.040152257	0	0
ENSMUSG00000026380	Tfcp2l1	0.001858352	0.002109641	0.001914847	0	0	0	0	0	0.023467292	0
ENSMUSG00000048402	Gli2	0.752743544	0.866094562	0.68670056	0.479905655	1.200272782	0.997987599	0.88041782	0.384222803	1.178829591	0.627760225
ENSMUSG00000097408	Gm26831	0	0	0.003352794	0	0	0	0	0	0	0
ENSMUSG00000099860	Gm29456	0	0	0.005570255	0	0	0	0	0	0	0
ENSMUSG00000101179	Gm29455	0	0.006006006	0	0	0	0	0	0	0	0
ENSMUSG00000037035	Inhbb	0.31559864	0.251545736	0.357670836	0.253812888	0.153147718	0.357114968	0.05545414	0.244810607	0.266941403	0.314431174
ENSMUSG00000004451	Ralb	0.200964048	0.244241061	0.249206968	0.205315238	0.336625796	0.301887823	0.189468098	0.325171711	0.168382148	0.433587052
ENSMUSG00000098447	Gm27184	0	0.003399113	0.002021366	0	0	0	0	0	0	0
ENSMUSG00000098923	Tmem185b	0.118410523	0.065686365	0.101064518	0.088745185	0.091953181	0.15308751	0.078611877	0.036292028	0.167221658	0.23617824
ENSMUSG00000101731	3830432H09Rik	0.004051542	0	0	0.007692864	0.011877952	0	0	0	0	0
ENSMUSG00000026383	Epb41l5	0.265587395	0.325382904	0.205870658	0.240847442	0.507073041	0.23336696	0.290350214	0.243783505	0.205448201	0.243441228
ENSMUSG00000026384	Ptpn4	0.584808888	0.58271415	0.421872163	0.615962881	0.690550214	0.383270288	0.960459764	0.888851037	1.068404262	0.341966508
ENSMUSG00000101224	Gm28209	0.001345463	0.00622125	0	0	0	0	0	0.022207417	0	0
ENSMUSG00000036975	Tmem177	0.034124986	0.006132884	0.038087271	0.009167466	0.013528139	0	0.075728561	0	0.110912521	0.084449166
ENSMUSG00000036962	Cfap221	0	0	0	0	0	0	0	0	0	0
ENSMUSG00000026387	Sctr	0	0	0	0	0	0	0	0	0	0
ENSMUSG00000050777	Tmem37	0.02381432	0.005380772	0.029423178	0.044498284	0	0	0.063271614	0.041028671	0.052390308	0
ENSMUSG00000026385	Dbi	1.455849408	1.548618537	1.719671604	2.759095665	1.677814603	1.388272572	1.94576335	2.01432362	2.28677762	1.357054254
ENSMUSG00000026388	3110009E18Rik	0.248910144	0.3436112	0.372481926	0.196507638	0.110867146	0.111580566	0.389948118	0.153028246	0.287479296	0.410731708
ENSMUSG00000026389	Steap3	1.759780776	1.594915804	2.692780092	1.355374562	2.515214966	1.26621104	1.479681287	1.356181799	0.871536575	1.278560693
ENSMUSG00000036907	C1ql2	0.013128314	0.002312374	0.005491337	0	0.037313214	0	0	0	0	0
ENSMUSG00000101275	1700012E03Rik	0	0	0	0	0	0	0	0	0	0
ENSMUSG00000026390	Marco	0	0	0	0	0	0	0	0	0	0
ENSMUSG00000058665	En1	0	0	0	0	0	0	0	0	0	0
ENSMUSG00000099957	2610027F03Rik	0.0024693	0	0	0	0	0	0	0	0	0
ENSMUSG00000101386	Gm29346	0	0.011658604	0.008428197	0.013825637	0	0.026260077	0	0	0	0
ENSMUSG00000101922	Gm29345	0	0	0	0	0	0	0	0	0	0
ENSMUSG00000099336	Gm29348	0	0	0	0	0	0	0	0	0	0
ENSMUSG00000100979	Gm29347	0	0	0	0	0	0	0	0	0	0
ENSMUSG00000097881	Celrr	0.005589096	0.014861647	0.017954342	0	0	0	0	0.024571232	0	0.019297717
ENSMUSG00000101700	Gm29359	0	0	0	0	0	0	0	0	0	0
ENSMUSG00000003721	Insig2	0.637170282	0.665751372	0.747686164	0.557735808	0.701083306	0.813867863	0.517438579	0.486731764	0.428886765	0.602266142
ENSMUSG00000101791	2210011K15Rik	0.002200022	0.001130876	0.011558555	0	0	0	0	0.027625225	0	0
ENSMUSG00000026339	Ccdc93	0.313497679	0.243277915	0.248978988	0.305920019	0.422758322	0.296986773	0.269850314	0.294769613	0.324767108	0.575072299
ENSMUSG00000085857	Gm15392	0	0.003926521	0	0	0	0	0	0.023329601	0	0
ENSMUSG00000050534	Htr5b	0	0.002142554	0.004410776	0	0	0	0	0	0.035938904	0
ENSMUSG00000001674	Ddx18	0.402091805	0.414376802	0.405455545	0.348340005	0.431642687	0.322940421	0.489048478	0.462378234	0.328528624	0.629617792
ENSMUSG00000099960	Gm28590	0	0	0	0	0	0	0	0	0	0
ENSMUSG00000036815	Dpp10	0.007639638	0.013185609	0.001933955	0	0.023974093	0.022446283	0	0.019253577	0	0.035874182
ENSMUSG00000099574	1700121L03Rik	0	0	0	0	0	0	0	0	0	0
ENSMUSG00000026341	Actr3	0.827928442	0.920261315	1.045958167	0.837467523	0.853963032	1.048840632	0.830239545	1.228761895	0.572101658	0.881207465
ENSMUSG00000102063	Gm28706	0	0	0	0	0	0	0	0	0	0
ENSMUSG00000026342	Slc35f5	0.512736468	0.522362699	0.516976127	0.470355015	0.42486132	0.656292344	0.384135065	0.740589678	0.336173752	0.395237167
ENSMUSG00000026343	Gpr39	0.25604327	0.150882202	0.076061218	0.402120658	2.163165905	0.674758615	0.679068539	0.441360227	0.532081862	0.257985537
ENSMUSG00000026344	Lypd1	0.0220835	0.015507956	0.013239508	0.034207755	0.374571851	0.033878979	0.056098524	0.063016737	0.020749579	0
ENSMUSG00000049690	Nckap5	1.187984224	1.209213192	0.666316007	0.473620727	0.786772135	0.47135466	0.736367207	1.008490665	1.568407835	1.525696552
ENSMUSG00000101600	4930599A14Rik	0	0	0	0	0	0	0	0	0	0
ENSMUSG00000036155	Mgat5	0.443515408	0.658398981	0.422358138	0.52011954	0.540428478	0.485974562	0.388586212	0.681466659	0.872653052	0.381051708
ENSMUSG00000026347	Tmem163	0.005026552	0.010713794	0.017242528	0.050582234	0	0.022898176	0.010975183	0	0	0
ENSMUSG00000026348	Acmsd	0.001704565	0.011562515	0.004486642	0.010770941	0	0	0	0.019415515	0	0
ENSMUSG00000102014	2900009J06Rik	0.051800671	0.068309442	0.070458077	0.042510611	0.01680887	0.018211178	0.052858917	0.017446161	0.205537688	0
ENSMUSG00000026349	Ccnt2	1.061580083	1.160277993	1.083048917	0.717946607	0.922062601	0.940184087	1.201267534	1.2008853	0.687024552	1.173241537
ENSMUSG00000051590	Map3k19	0.012914226	0.014826109	0.053740962	0.010243865	0.02879931	0.057891413	0.075863413	0.021315235	0.041950708	0
ENSMUSG00000036104	Rab3gap1	0.799795062	0.904769462	0.891142275	0.651669262	1.003497337	0.836356725	0.747300501	0.676367792	1.252884253	1.27858827
ENSMUSG00000036086	Zranb3	0.134975395	0.142804545	0.101764086	0.145592828	0.160660703	0.09638367	0.223849205	0.296060353	0.501389992	0.088959247
ENSMUSG00000099760	Gm28800	0	0.013572245	0.003547798	0.023802094	0.049109946	0.047769715	0.018349062	0	0	0
ENSMUSG00000056211	R3hdm1	1.646596806	1.800196758	1.504509163	0.932224227	1.638367998	1.264957117	1.1857368	1.444788085	2.363538883	1.342572547
ENSMUSG00000026353	Ubxn4	1.31845775	1.454859726	1.338934961	1.116144091	1.040066935	1.640846764	1.340561436	1.158546104	1.216520646	1.619837923
ENSMUSG00000026354	Lct	0.002351552	0.00696519	0	0	0	0	0	0	0	0
ENSMUSG00000026355	Mcm6	0.066886264	0.086745597	0.099295176	0.097252253	0.101359439	0.110544256	0.053355137	0.154176682	0.055336695	0.024639524
ENSMUSG00000026356	Dars	0.559010533	0.677590236	0.525499886	0.623181492	0.771185748	0.683738603	0.659429597	0.829477989	0.542734322	0.662623015
ENSMUSG00000045382	Cxcr4	0.002336214	0.009063628	0.003361881	0.026804186	0.017213719	0	0.022003822	0.08799754	0.019762846	0
ENSMUSG00000097283	Gm26686	0	0	0	0	0	0	0	0	0	0
ENSMUSG00000042581	Thsd7b	0.273237201	0.048036899	0.049563967	0.171056588	2.148141251	0.326540504	0.279058013	0.266083429	0.197055247	0.233104705
ENSMUSG00000086633	Gm16081	0	0	0	0	0	0	0	0	0	0
ENSMUSG00000026401	Cd55b	0.011744465	0.013271515	0.013837033	0.006204182	0	0.013479124	0	0	0	0.030158998
ENSMUSG00000087691	Cd55os	0.122024719	0.120640283	0.336754008	0.033911921	0.168848987	0.089900901	0.085613806	0.156934913	0	0.08121024
ENSMUSG00000086825	Gm15675	0.253913481	0.274146219	0.864824648	0.205083156	0.32987907	0.313674209	0.132727071	0.251301856	0	0.217575392
ENSMUSG00000026399	Cd55	1.681159739	1.520064401	5.925990561	1.625121683	2.285242916	3.043670865	0.778544674	2.171593615	0.168384266	1.716704539
ENSMUSG00000085526	Gm16083	0.922382356	0.98733225	0.549293141	0.392944494	1.104946172	0.635689115	0.542659636	0.537281763	0.25552926	0.522112368
ENSMUSG00000042554	Zp3r	0.012468147	0	0.016252023	0.006135722	0.010605848	0	0	0	0	0.073885282
ENSMUSG00000026405	C4bp	0	0.004443171	0	0.006135722	0	0	0	0	0	0
ENSMUSG00000101904	Gm29427	0.010667618	0.009285073	0.006117855	0.04447388	0.019667076	0.022846944	0	0	0	0
ENSMUSG00000026409	Pfkfb2	0.064191492	0.068673769	0.036896735	0.047343292	0.024470731	0.042936794	0.039629229	0.020985478	0.033119437	0.130157525
ENSMUSG00000046404	Yod1	0.081399257	0.106925494	0.121212811	0.031672661	0.159664761	0.118059113	0.077343629	0.066637088	0.138807822	0.078386128
ENSMUSG00000042510	AA986860	0.029033545	0.003725194	0.026877943	0.025039658	0	0.02122962	0	0.015278559	0.086576001	0.032702823
ENSMUSG00000099556	Gm28857	0	0	0	0	0	0	0	0	0	0
ENSMUSG00000100106	Gm28856	0	0	0	0	0	0	0	0	0	0
ENSMUSG00000026415	Fcamr	0	0	0	0	0	0	0	0	0	0
ENSMUSG00000086706	Gm15848	0	0	0	0	0	0	0	0	0	0
ENSMUSG00000026417	Pigr	0	0	0	0	0	0	0	0	0	0
ENSMUSG00000042474	Fcmr	0.001846904	0	0	0.006252141	0	0	0	0	0	0
ENSMUSG00000026420	Il24	0	0	0	0	0	0	0	0	0	0
ENSMUSG00000026416	Il20	0	0	0	0	0	0	0	0	0	0
ENSMUSG00000016524	Il19	0	0	0	0	0	0	0	0	0	0
ENSMUSG00000016529	Il10	0	0	0	0	0	0	0	0	0	0
ENSMUSG00000016528	Mapkapk2	0.568628528	0.66296613	0.621696732	0.565821442	0.556735261	0.608986264	0.486805932	0.542718975	0.803890026	0.921034886
ENSMUSG00000016526	Dyrk3	0	0	0.007424043	0.00798277	0	0	0	0	0.053067993	0
ENSMUSG00000026427	Eif2d	0.163280036	0.202717251	0.185176855	0.137292159	0.259527364	0.153498649	0.219878724	0.27951768	0.18842997	0.120881527
ENSMUSG00000026430	Rassf5	0.046531141	0.057482225	0.060241927	0.088589311	0.039805502	0.090120926	0.071008482	0.019318595	0	0.056306143
ENSMUSG00000042349	Ikbke	0.220168062	0.254586906	0.196349844	0.073646661	0.346314547	0.161049411	0.255563135	0.130214281	0.351388434	0.153395122
ENSMUSG00000102027	Gm28914	0	0	0	0	0	0	0	0	0	0
ENSMUSG00000102055	Gm28913	0.003459394	0	0.006132054	0	0	0	0	0	0	0
ENSMUSG00000026425	Srgap2	2.708091464	3.110924784	2.16938447	1.621937657	3.153854785	1.827638649	3.068649424	3.036836288	1.705347152	2.046624232
ENSMUSG00000055184	Fam72a	0.018990939	0.01183368	0.012478503	0.010206918	0	0.010759908	0	0.024393576	0	0.049112725
ENSMUSG00000026432	Avpr1b	0	0	0	0	0	0	0	0	0	0
ENSMUSG00000004552	Ctse	0	0	0	0.006252141	0	0	0	0	0	0
ENSMUSG00000052688	Rab7b	0.171209733	0.237186347	0.250527688	0.095262855	0.176639298	0.371035178	0.321558646	0.047302437	0.165644359	0.087853159
ENSMUSG00000042268	Slc26a9	0	0	0	0	0	0	0	0	0	0
ENSMUSG00000042251	Pm20d1	0.002537214	0.002152382	0.003988135	0.020851607	0	0.011383402	0	0.074678598	0.135186943	0
ENSMUSG00000013275	Slc41a1	0.2980618	0.222833457	0.261095036	0.24343003	0.169530623	0.33522307	0.239076238	0.372312994	0.599736678	0.345295788
ENSMUSG00000026433	Rab29	0.155374294	0.192922953	0.126584578	0.137231175	0.12803287	0.133591859	0.077581739	0.091614928	0.214469416	0.135074413
ENSMUSG00000026434	Nucks1	0.982344657	0.812610029	1.070892136	0.956908226	0.722155515	1.194263142	0.977269994	0.666507276	1.046313876	1.070583961
ENSMUSG00000026435	Slc45a3	0.142664823	0.140378332	0.083030744	0.047506824	0.114156184	0.029905304	0.112918525	0.173168996	0.083501131	0.16117911
ENSMUSG00000026436	Elk4	0.677513561	0.63662073	0.578303122	0.561638174	0.414377234	0.841233583	0.645952545	0.598348376	0.55549503	0.842734469
ENSMUSG00000059149	Mfsd4a	0.605030524	0.631128912	0.596546448	0.579217903	0.457093848	0.594841103	0.649668871	0.598455042	0.573822797	0.970078017
ENSMUSG00000026437	Cdk18	0.039783535	0.054361578	0.021298786	0.028052199	0.038601996	0.032209854	0	0	0	0.028658551
ENSMUSG00000099874	Gm29629	0	0.003204684	0	0	0	0	0	0	0	0
ENSMUSG00000079330	Lemd1	0	0	0	0	0	0	0	0	0	0
ENSMUSG00000118219	Gm29695	0	0	0	0	0	0	0	0	0	0
ENSMUSG00000066936	Gm10188	0	0	0	0	0	0	0	0	0	0
ENSMUSG00000101549	Gm29630	0	0	0	0	0	0	0	0	0	0
ENSMUSG00000042115	Klhdc8a	0.015316019	0.024905913	0.018977853	0.037706916	0.029558165	0.011038259	0.035168267	0.041028671	0.071245053	0
ENSMUSG00000009772	Nuak2	0.073275293	0.041236709	0.199632984	0.037604944	0.088348994	0.075282336	0.012045595	0.18026557	0	0.072751039
ENSMUSG00000100658	F730311O21Rik	0.009693052	0.060066195	0.294050154	0.019045809	0.07373416	0.099696565	0.038626546	0.124600257	0	0.104400533
ENSMUSG00000042066	Tmcc2	0.206102435	0.27479553	0.361862249	0.187233964	0.243518444	0.241618059	0.279514952	0.251005152	0.335630248	0.256127811
ENSMUSG00000090079	Gm15849	0.001075459	0	0	0	0	0	0	0	0	0
ENSMUSG00000042046	Dstyk	0.660354013	0.827640321	0.610916096	0.62575391	0.78753176	0.732390027	0.500500297	0.518348455	0.717503093	0.658042829
ENSMUSG00000026439	Rbbp5	0.229067498	0.254144827	0.187381935	0.165947189	0.237647744	0.239896628	0.336371394	0.129128663	0.15238892	0.161728383
ENSMUSG00000048174	Tmem81	0.002422197	0.01045718	0.023898478	0.009108571	0.020185872	0.0088066	0	0.018872482	0	0
ENSMUSG00000053024	Cntn2	0.003971048	0	0	0.031452581	0.030086408	0.007941273	0	0.037508252	0	0
ENSMUSG00000026442	Nfasc	0.004172133	0.009403147	0	0	0.042664513	0	0.05316419	0	0	0
ENSMUSG00000101126	Gm10538	0	0	0	0	0	0	0	0	0	0
ENSMUSG00000026443	Lrrn2	0.296619179	0.280815333	0.403188841	0.276716427	0.420169835	0.661039666	0.317196752	0.184747045	0.229629472	0.44296954
ENSMUSG00000054387	Mdm4	1.192280582	1.372361917	1.066274472	0.781177107	1.102126248	0.874531928	1.620527398	1.440274785	0.937535299	1.109019739
ENSMUSG00000026447	Pik3c2b	0.160486513	0.254113935	0.234154632	0.175149583	0.159077779	0.131429371	0.01576725	0.35640639	0.099366598	0.162407646
ENSMUSG00000101102	Gm28609	0.043442493	0.040025532	0.027232942	0.027580657	0.019276737	0.025661452	0.018733503	0.120325969	0	0
ENSMUSG00000046062	Ppp1r15b	0.343361268	0.251605427	0.384041135	0.26810851	0.224450457	0.336761234	0.327641283	0.371524976	0.218940761	0.398544506
ENSMUSG00000041757	Plekha6	2.390759581	2.841698007	1.910618984	1.501801479	1.44147172	2.320215583	1.714000655	1.589535802	0.997389587	2.031835991
ENSMUSG00000101693	Gm19461	0.229452484	0.34032802	0.209822815	0.16832893	0.113217569	0.240813475	0.173833165	0.162208985	0.068532234	0.302622422
ENSMUSG00000103421	Golt1a	0	0	0	0	0	0	0	0	0	0
ENSMUSG00000115958	Gm28040	0	0	0	0	0	0	0	0	0	0
ENSMUSG00000098306	Gm28040	0	0	0	0	0	0	0	0	0	0
ENSMUSG00000116158	Kiss1	0	0	0	0	0	0	0	0	0	0
ENSMUSG00000070645	Ren1	0	0	0	0	0	0	0	0	0	0
ENSMUSG00000070644	Etnk2	0.02290198	0.043712184	0.155153581	0.005278432	0.017005068	0.140889429	0.096994051	0.019415515	0.200745219	0
ENSMUSG00000070643	Sox13	0.207524827	0.344385468	0.504263816	0.153226384	0.239342671	0.26974158	0.139350138	0.31914162	0.066323651	0.518029023
ENSMUSG00000090553	Snrpe	0.531545197	0.518833462	0.573063691	0.749935436	0.313961399	0.59729124	0.514484797	0.561788787	0.499077346	0.456655072
ENSMUSG00000102976	Zc3h11a	0.07745704	0.092227306	0.108342774	0.035451374	0.009692627	0.078462098	0.074291518	0.133149859	0.033388982	0.122875936
ENSMUSG00000116275	Zc3h11a	0	0	0	0	0	0	0	0	0	0
ENSMUSG00000094410	Gm38394	0.766898219	0.833475016	0.744346885	0.487149712	0.675540025	0.61965939	0.624862313	0.559211164	0.393053006	0.555397894
ENSMUSG00000051998	Lax1	0.001858352	0.003109128	0	0	0.027638663	0.029547684	0	0	0	0
ENSMUSG00000026463	Atp2b4	1.104825368	0.793383758	0.933962872	0.857779371	0.813531122	1.534340493	0.787551664	1.080282121	0.717879474	0.987835475
ENSMUSG00000100830	Gm28441	0	0	0	0	0	0	0	0	0	0
ENSMUSG00000010311	Optc	0.007263441	0.002145002	0	0	0	0	0	0	0	0
ENSMUSG00000090208	Gm15851	0.033356891	0.034405631	0.051955205	0.046402765	0.016390648	0.08261557	0.042822849	0	0.123294064	0.113053789
ENSMUSG00000041577	Prelp	3.920779483	2.629848688	4.399177722	3.658773014	1.182952643	5.38299637	2.268207296	2.858961273	9.488260153	3.382318756
ENSMUSG00000100987	Gm1627	0.002954902	0	0	0	0	0	0	0	0	0
ENSMUSG00000041559	Fmod	0.041619588	0.039312975	0.01640343	0.062582186	0	0.503237531	0.08497763	0.184374638	4.359230391	0.017949068
ENSMUSG00000020423	Btg2	0.300787432	0.348266348	0.268642222	0.301719485	0.223843249	0.403915973	0.514774953	0.681568283	0.117612447	1.014232319
ENSMUSG00000026450	Chit1	0	0	0	0	0	0	0	0	0	0
ENSMUSG00000064246	Chil1	0.003263579	0.011127729	0.004288762	0	0	0	0	0	0.023453533	0
ENSMUSG00000042451	Mybph	0	0	0	0	0	0	0	0	0	0
ENSMUSG00000042429	Adora1	0.015117947	0.018374938	0.008869272	0.042985347	0	0.02907725	0	0.024429808	0	0.042435776
ENSMUSG00000026459	Myog	0	0	0	0	0	0	0	0	0	0
ENSMUSG00000026458	Ppfia4	0.008178328	0.031277645	0.015734741	0.005481699	0.009594424	0.009873735	0.017764261	0	0	0.0283762
ENSMUSG00000042305	Tmem183a	0.209280576	0.201416125	0.211375554	0.216555573	0.235181467	0.232143559	0.099830739	0.260023789	0.168873665	0.228022746
ENSMUSG00000050526	Mgat4f	0	0	0	0	0	0	0	0	0	0
ENSMUSG00000026456	Cyb5r1	0.156616651	0.187872937	0.148743315	0.213404886	0.119581873	0.139206404	0.053219395	0.303571309	0.29995922	0.162077377
ENSMUSG00000026457	Adipor1	0.583711644	0.482630997	0.555714154	0.775093939	0.431790199	0.630398676	0.57794174	0.634722653	0.382391284	0.420976829
ENSMUSG00000101061	Platr1	0.001586551	0	0	0	0	0	0	0	0	0
ENSMUSG00000026455	Klhl12	0.389894462	0.455638141	0.291251784	0.263330938	0.458019764	0.253714987	0.352336017	0.52221814	0.454393629	0.443955877
ENSMUSG00000042229	Rabif	0.200459666	0.219602787	0.228759578	0.189500278	0.206298311	0.173372247	0.258990025	0.171351241	0.29598852	0.17457184
ENSMUSG00000046367	Mgat4e	0	0	0	0	0	0	0	0	0	0
ENSMUSG00000042207	Kdm5b	0.82775511	1.180489848	0.900542354	0.82563476	0.900002781	1.023296804	0.899435515	0.605239097	0.879406491	0.936985782
ENSMUSG00000097435	Gm26783	0	0	0	0.004550791	0	0	0	0	0	0
ENSMUSG00000026452	Syt2	0.016176252	0.011040664	0.006093068	0	0.055725972	0	0.025784864	0	0.020749579	0
ENSMUSG00000073557	Ppp1r12b	1.851848002	2.043319347	1.619448267	1.38171967	3.203634437	1.495955741	2.73733281	1.818586018	3.66255942	1.223387886
ENSMUSG00000101168	Gm28892	0.016456225	0.00767926	0.014476538	0	0.016091244	0.011115557	0.018086159	0	0	0
ENSMUSG00000026429	Ube2t	0.012536834	0.007111449	0.015203483	0	0	0	0	0	0.036823936	0.037061195
ENSMUSG00000042793	Lgr6	0.013036874	0.037511444	0.022004851	0.046634706	0.061946778	0.064577412	0.014011902	0.025411152	0.044125758	0.075920143
ENSMUSG00000097988	Gm10535	0	0	0	0	0	0	0	0	0	0
ENSMUSG00000031506	Ptpn7	0	0	0	0.009214704	0.032701848	0.015803481	0	0	0	0
ENSMUSG00000026426	Arl8a	0.494646764	0.358086417	0.466663926	0.374556024	0.488156546	0.614952711	0.527306956	0.351694351	0.225733764	0.460969386
ENSMUSG00000085311	Gm15445	0.015005551	0.001499103	0.013149211	0	0	0	0.017291884	0.027631026	0	0.03002426
ENSMUSG00000026424	Gpr37l1	0.002239276	0	0	0	0	0	0	0	0	0
ENSMUSG00000097680	Gm26642	0.001583293	0.011136165	0.006457594	0	0	0	0	0	0	0
ENSMUSG00000003051	Elf3	0	0	0	0	0	0	0	0	0	0
ENSMUSG00000041926	Rnpep	0.371518851	0.423630363	0.265304981	0.375652923	0.563858093	0.205097355	0.714855112	0.287267587	0.624531732	0.309247188
ENSMUSG00000062580	Timm17a	0.707802002	0.774230866	0.660121585	1.006409819	0.805360921	0.685691082	0.948147889	1.010109948	0.763273559	0.677471347
ENSMUSG00000048096	Lmod1	0.027101322	0.020414103	0.019090019	0.12496547	0.22259428	0.030878855	0.299770278	0.044218446	0.091085067	0.1333095
ENSMUSG00000041889	Shisa4	0.198034686	0.140174677	0.172731457	0.108944045	0.112468121	0.209326318	0.324464765	0.024598794	1.169568678	0.041545955
ENSMUSG00000041879	Ipo9	0.485498802	0.557919041	0.503993163	0.35223386	0.518484434	0.442851799	0.572409908	0.304664325	0.371331885	0.327130418
ENSMUSG00000009418	Nav1	5.947547494	6.837444226	7.28282471	4.422830781	5.771047634	6.8948344	3.589632369	5.016765558	2.284820674	4.942845124
ENSMUSG00000054412	Gm4793	0.116859646	0.172211955	0.129932287	0.07872549	0.045011834	0.13270709	0.063955334	0.136315388	0.121079674	0.111344642
ENSMUSG00000026421	Csrp1	0.407738536	0.388848727	0.343448018	0.305944907	0.184450379	0.528298717	0.895167897	0.379036049	0.530209265	0.452743812
ENSMUSG00000041801	Phlda3	0.31123529	0.277237498	0.42040361	0.410518842	0.097508972	0.864074106	0.518311969	0.332614262	0.150728697	0.296820345
ENSMUSG00000026418	Tnni1	0	0.003204684	0	0	0.015779541	0	0	0	0	0
ENSMUSG00000041782	Lad1	0.006255478	0.003865864	0	0.015608416	0.028310006	0	0	0	0	0
ENSMUSG00000026414	Tnnt2	19.22017308	21.86345138	16.4930803	43.93250384	20.51524684	15.96139353	18.97368308	28.08368645	22.89750784	15.67020667
ENSMUSG00000026413	Pkp1	0	0	0	0	0	0.039231379	0	0	0	0
ENSMUSG00000051985	Igfn1	0	0	0	0	0	0	0	0	0	0
ENSMUSG00000026411	Tmem9	0.275522678	0.229597238	0.366916179	0.25747488	0.241840184	0.249514331	0.1051761	0.303348654	0.07560222	0.43962772
ENSMUSG00000097918	Ascl5	0	0	0	0	0	0	0	0	0	0
ENSMUSG00000026407	Cacna1s	0.013598738	0.004811943	0.005105557	0.03231941	0	0.030101798	0	0	0	0
ENSMUSG00000102717	Gm37759	0	0	0	0	0	0	0	0	0	0
ENSMUSG00000041642	Kif21b	0.039660077	0.055883533	0.028670744	0.028213733	0.018162929	0	0	0.034985096	0	0.024460164
ENSMUSG00000087230	Mroh3	0	0	0	0	0	0	0	0	0	0
ENSMUSG00000041605	Inava	0	0.003030479	0	0	0	0	0	0	0	0
ENSMUSG00000097315	Gm26568	0	0	0	0	0	0	0	0	0	0
ENSMUSG00000103594	A430034D21Rik	0	0	0	0	0	0	0	0	0	0
ENSMUSG00000102941	Gm37552	0	0	0	0	0	0	0	0	0	0
ENSMUSG00000097433	Gm26781	0.017153641	0.023361155	0.016505862	0.011404685	0.011111407	0.043298733	0.018523287	0.031320863	0	0
ENSMUSG00000052759	Gpr25	0	0	0	0	0	0	0	0	0	0
ENSMUSG00000041570	Camsap2	0.536191886	0.500882373	0.565224541	0.304905497	0.519662839	0.411112375	0.458266201	0.585376603	0.690914247	0.422959107
ENSMUSG00000026404	Ddx59	0.053455038	0.031649918	0.050745685	0.089239849	0.025706036	0.09368023	0.020393659	0.051066739	0.074172435	0.020341824
ENSMUSG00000041498	Kif14	0	0.008371511	0	0	0	0	0	0.04136402	0	0
ENSMUSG00000104414	Gm37799	0	0	0	0	0	0	0	0	0	0
ENSMUSG00000104509	Gm33994	0	0	0	0	0	0	0	0	0	0
ENSMUSG00000104366	4933409D19Rik	0	0	0	0	0	0	0	0	0	0
ENSMUSG00000097229	Platr23	0	0	0	0	0	0	0	0	0	0
ENSMUSG00000041483	Zfp281	0.267355665	0.185386681	0.209232544	0.144067916	0.179694044	0.137617463	0.120449112	0.115878831	0.201172711	0.483325842
ENSMUSG00000097113	Gm19705	0.041506211	0.073209337	0.045091876	0.015663375	0.033000756	0.026351737	0.082737828	0.052484622	0.032232071	0.028592505
ENSMUSG00000097448	Platr22	0.001670791	0.008252153	0.003642257	0.009311143	0.015341753	0	0	0	0	0
ENSMUSG00000026398	Nr5a2	0	0.004236742	0	0.010712579	0	0	0	0.023550912	0	0
ENSMUSG00000098045	Gm26979	0.03117522	0.049742784	0.025030261	0	0.041679248	0.008480987	0.069405603	0.051553912	0.072479536	0.0283762
ENSMUSG00000098145	Gm26936	0.192639008	0.419907134	0.24974161	0.127545179	0.403288902	0.413913878	0.248434596	0.215655271	0.635147087	0.083502158
ENSMUSG00000098206	Mir181a-1hg	0.039228205	0.038933598	0.039194442	0.030456115	0.014173541	0.011870338	0.066001053	0.02190427	0.055512155	0.061907713
ENSMUSG00000026395	Ptprc	0.057985899	0.061048497	0.042256091	0.247219542	0.060941129	0	0.160171883	0.016204304	0.099584663	0.104510714
ENSMUSG00000099459	Gm28556	0	0	0	0	0	0	0	0	0	0
ENSMUSG00000026394	Atp6v1g3	0	0	0	0	0	0	0	0	0	0
ENSMUSG00000026393	Nek7	1.259607374	1.562552935	1.219988298	1.176107877	1.437907735	1.26276488	1.119236132	1.628415396	1.33236246	1.504867751
ENSMUSG00000099510	Gm28501	0.322335759	0.395188488	0.216444403	0.210490905	0.299588693	0.346875265	0.287469173	0.435071541	0.26489262	0.36528205
ENSMUSG00000100459	Gm5833	0	0	0	0	0	0	0.022168623	0	0	0
ENSMUSG00000019230	Lhx9	0.00359807	0.00401471	0	0	0	0.026982458	0	0	0	0
ENSMUSG00000079283	2310009B15Rik	0.181077503	0.151637782	0.126240892	0.185365043	0.109161437	0.131465303	0.109462314	0.221942614	0.171836727	0.132416049
ENSMUSG00000099808	1700019P21Rik	0	0.002445973	0	0	0	0	0	0	0	0
ENSMUSG00000056268	Dennd1b	1.573114779	1.896333072	1.349813465	1.058294598	1.728457097	1.411842606	1.704627148	1.408234764	1.891828932	1.958571934
ENSMUSG00000063681	Crb1	0.020173359	0.01528099	0.023258453	0	0.04737004	0.027538195	0.013998191	0.042957541	0.039292731	0.038290892
ENSMUSG00000103844	4933436E23Rik	0	0	0	0	0	0	0	0	0	0
ENSMUSG00000102661	Gm34816	0	0	0	0	0	0	0	0	0	0
ENSMUSG00000033964	Zbtb41	0.249037887	0.321640185	0.309129577	0.343133442	0.235087981	0.27245019	0.122564929	0.341145161	0.209594527	0.383440882
ENSMUSG00000033952	Aspm	0.004402091	0.007869741	0	0.025328824	0.044694735	0.009702332	0	0	0	0
ENSMUSG00000026368	F13b	0	0	0	0	0	0	0	0	0	0
ENSMUSG00000057037	Cfhr1	0	0	0	0	0	0	0	0	0	0
ENSMUSG00000070594	Gm4788	0.010110125	0.014678673	0.014970602	0.00842101	0.017569011	0.010167189	0.057670951	0	0	0.046912954
ENSMUSG00000033898	Cfhr2	0.046206638	0.047777015	0.033656008	0.02600361	0.076452335	0.030554651	0.066130003	0.062796969	0.083908708	0.189388587
ENSMUSG00000026365	Cfh	21.44927264	12.04207456	20.56264547	20.90773165	27.14998366	39.95719365	43.5622648	17.92896414	32.80415058	17.10799143
ENSMUSG00000052726	Kcnt2	10.17098101	11.31662222	11.01021069	5.876648658	17.10270646	13.07738419	16.53991038	8.673689079	9.576710347	8.164640853
ENSMUSG00000102368	4930590L20Rik	1.57492375	1.549693065	1.426859962	0.658933102	2.056503328	2.13669973	2.512184484	1.550325872	1.298979632	1.584151203
ENSMUSG00000026361	Cdc73	1.051913375	1.112714484	1.03567418	0.773889485	1.057999301	0.985751179	1.289556376	0.939656321	1.086590919	0.857699113
ENSMUSG00000033849	B3galt2	0.402626111	0.501377162	0.318235408	0.218247174	0.375648478	0.362860555	0.584244299	0.459153706	0.258943342	0.691285093
ENSMUSG00000018196	Glrx2	0.333236282	0.395294331	0.432073866	0.481451869	0.356863874	0.465192303	0.386515484	0.375698481	0.287567662	0.483261603
ENSMUSG00000018199	Ro60	0.456175874	0.576118758	0.464623392	0.490449319	0.616158962	0.458348523	0.558010817	0.575421502	0.555414111	0.452424616
ENSMUSG00000018189	Uchl5	0.296541808	0.32318812	0.270561444	0.182057182	0.390106868	0.181145096	0.308918664	0.26002914	0.236093168	0.257089308
ENSMUSG00000026360	Rgs2	0.070193257	0.080214331	0.046828896	0.163306022	0.030059653	0.021294628	0.081213293	0.097348772	0.294206674	0.046267942
ENSMUSG00000051079	Rgs13	0.002281883	0.002550104	0	0.013469791	0	0	0	0	0	0
ENSMUSG00000026358	Rgs1	0	0	0	0	0	0	0	0	0.023021583	0
ENSMUSG00000098509	Rgs21	0	0	0.002358004	0	0	0	0	0	0	0
ENSMUSG00000026357	Rgs18	0.001395927	0.003761276	0	0.018511031	0	0	0	0	0	0.039903593
ENSMUSG00000099964	Gm29514	0	0	0	0	0	0	0	0	0	0
ENSMUSG00000035131	Brinp3	0.050967152	0.026450915	0.055154793	0	0.154280474	0	0.045767481	0	0	0
ENSMUSG00000085822	Gm15584	0	0	0	0	0	0	0.034089321	0.020985478	0	0
ENSMUSG00000099629	Gm29515	0	0	0	0	0	0	0	0	0	0
ENSMUSG00000102074	Gm29020	0	0	0	0	0	0	0	0	0	0
ENSMUSG00000101011	Gm29398	0	0	0	0	0	0	0	0	0	0
ENSMUSG00000056220	Pla2g4a	0.962263308	1.051467505	1.314895078	0.683935036	2.234234965	2.319146092	1.41633269	0.596193643	0.892925606	1.254442978
ENSMUSG00000032487	Ptgs2	0.032992432	0.035021821	0.069548198	0.01313275	0.138437534	0.438650814	0.121592679	0.095083588	0.027215513	0.136124904
ENSMUSG00000097754	Ptgs2os2	0	0	0	0	0	0.0186303	0	0.024598794	0	0
ENSMUSG00000006007	Pdc	0	0	0	0	0	0	0	0	0	0
ENSMUSG00000099447	2310030A07Rik	0	0	0	0.004525905	0	0	0	0	0	0
ENSMUSG00000006010	Odr4	0.508883751	0.457307557	0.443027428	0.44409343	0.64606547	0.543583611	0.397076381	0.472373719	0.610502652	0.396616278
ENSMUSG00000006005	Tpr	2.661901529	2.726647954	2.533429896	2.871834683	2.468967647	2.44077848	2.513793563	2.813576546	2.888451145	2.97953068
ENSMUSG00000006014	Prg4	0.139633917	0.076602127	0.349497829	0.309684141	0.298025435	3.152270315	0.446160006	1.29354111	16.77261032	0.535419727
ENSMUSG00000066842	Hmcn1	0.397050609	0.258443696	0.389595579	0.752418096	0.766219492	0.650343499	3.917974061	2.392301666	1.858980938	0.369176014
ENSMUSG00000093650	Gm20631	0.086448494	0.080738589	0.081827474	0.122350804	0.09818996	0.131236746	0.846539609	0.414098386	0.692367827	0.062425245
ENSMUSG00000099622	Gm29188	0	0	0	0.006529759	0	0	0	0.024142926	0	0
ENSMUSG00000102095	C730036E19Rik	0	0.001544331	0	0	0	0	0	0	0	0
ENSMUSG00000114212	Gm47985	0	0	0	0.013814902	0	0	0	0	0	0
ENSMUSG00000114943	Gm8947	0	0	0	0	0	0	0	0	0	0
ENSMUSG00000114694	Gm47995	0	0	0	0	0	0	0	0	0	0
ENSMUSG00000114582	3110040M04Rik	0	0	0	0	0	0	0	0	0	0
ENSMUSG00000114591	Gm47996	0	0	0	0	0	0	0	0	0	0
ENSMUSG00000100954	Gm10138	0.04430701	0.064097569	0.033934452	0.067284039	0.011877952	0.059845255	0.080485348	0.058510805	0.078830614	0
ENSMUSG00000023150	Ivns1abp	1.33782132	1.655561049	1.146065824	2.387421448	1.268170594	1.167956605	1.562336492	1.887713968	2.22560675	1.450699234
ENSMUSG00000052748	Swt1	1.018331655	1.154350082	0.989094871	0.731255959	1.156164523	0.992225039	1.271481282	0.901821478	1.588483466	1.249218252
ENSMUSG00000053286	Trmt1l	0.596969776	0.652226897	0.517513349	0.443942574	0.604902166	0.665509139	0.710861385	0.541684616	0.609126138	0.664338047
ENSMUSG00000026484	Rnf2	0.45861691	0.49692477	0.347873493	0.330441402	0.598961286	0.534568423	0.434819214	0.51355834	0.296518474	0.417490167
ENSMUSG00000100357	Gm28181	0	0	0	0	0	0	0	0	0	0
ENSMUSG00000026483	Fam129a	1.386185635	1.485582076	1.524980173	1.035953015	2.004197009	1.213718229	1.677647911	1.28790222	0.961466831	1.218857294
ENSMUSG00000100594	2810414N06Rik	0.01056732	0.00163824	0.005318937	0.007857626	0	0	0	0.016328983	0	0
ENSMUSG00000043019	Edem3	0.770595912	0.703662833	0.665210112	0.547657045	0.778218345	0.78100372	0.440915581	0.461369483	0.64240844	0.635874579
ENSMUSG00000032666	1700025G04Rik	0.871184611	1.103794402	1.094505548	0.841001453	1.075065951	1.418602913	1.031022647	1.080587302	0.505463922	0.72554976
ENSMUSG00000100685	Gm28610	0.001522114	0.010407131	0.021165202	0	0	0.012163231	0.031372838	0.024205104	0	0
ENSMUSG00000014980	Tsen15	0.289488701	0.241277258	0.228745665	0.266074071	0.470866725	0.22478591	0.280162562	0.117366769	0.190093169	0.249518759
ENSMUSG00000032649	Colgalt2	1.459943037	1.665736579	1.514235977	0.739234368	1.13116099	0.920215054	0.818897021	1.367588515	0.704939321	1.298442276
ENSMUSG00000026482	Rgl1	0.944493039	1.108924354	0.888489891	0.825946935	1.232090628	1.02018207	0.714071951	1.81370112	0.264095634	1.103772548
ENSMUSG00000055547	Apobec4	0.025621371	0.01588202	0.011854195	0.008620927	0.054091973	0.03568334	0.017319796	0	0.019384541	0
ENSMUSG00000008475	Arpc5	0.540286193	0.525294964	0.594623338	0.699917869	0.473977597	0.569184031	0.586171839	0.434788178	0.549950405	0.483968338
ENSMUSG00000026480	Ncf2	0.024684232	0.018621414	0.010337491	0.052455028	0	0	0.068191396	0.042753789	0.023208587	0
ENSMUSG00000042772	Smg7	0.811295879	0.997484862	0.78810634	0.463368657	0.832906689	0.561203929	0.869554279	0.797057206	0.824670682	1.08950721
ENSMUSG00000042751	Nmnat2	0.028714728	0.05313427	0.095427205	0.027935446	0.107631521	0.024627739	0.092139689	0.065319176	0.065433844	0.023409336
ENSMUSG00000099969	Gm28960	0	0	0.011382204	0.019651932	0.01280554	0	0	0.05710443	0	0
ENSMUSG00000026479	Lamc2	0.170124205	0.152458824	0.1842439	0.086876713	0.102031614	0.096995614	0	0.048536754	0	0.03209119
ENSMUSG00000026478	Lamc1	15.01696013	12.60612683	22.35397227	12.76490367	11.28828384	12.22552539	5.560982702	10.6671043	1.593152101	14.83006678
ENSMUSG00000042708	Shcbp1l	0.004619089	0.004733983	0.00794606	0	0	0	0	0	0	0.023463823
ENSMUSG00000042699	Dhx9	0.553901717	0.564991615	0.548729099	0.491294443	0.51410159	0.665203963	0.648815019	0.514417023	0.304307579	0.733870028
ENSMUSG00000042684	Npl	0.005741995	0.005616274	0	0.03105786	0	0	0.027978132	0	0.036182723	0.024568214
ENSMUSG00000042671	Rgs8	0.001528797	0	0	0	0	0	0	0	0	0
ENSMUSG00000100945	Gm29529	0	0	0	0	0	0	0	0	0	0
ENSMUSG00000100334	C230024C17Rik	0.004016862	0	0	0	0	0	0	0	0	0
ENSMUSG00000026475	Rgs16	0.002986527	0.002538607	0	0	0	0	0	0.038450891	0	0.016724422
ENSMUSG00000099568	Gm28513	0.006584943	0.004968746	0	0.006854235	0	0	0	0.023329601	0	0
ENSMUSG00000066800	Rnasel	0.078741228	0.069998063	0.048496226	0.090582483	0.142777529	0.030697058	0.068000375	0	0.052175713	0.090027044
ENSMUSG00000042641	Rgsl1	0.012270922	0.006060151	0.003452979	0	0	0.041357519	0.018595518	0	0.040899796	0.020736735
ENSMUSG00000045968	Teddm2	0.065436877	0.0769564	0.048701923	0.081189508	0.02895283	0.064648772	0.037191035	0.023755	0.235671136	0.048845888
ENSMUSG00000043282	Teddm1b	0.001733586	0.006475658	0	0	0	0	0	0	0.044101433	0
ENSMUSG00000047053	Teddm1a	0.002401715	0	0	0	0	0	0	0	0	0
ENSMUSG00000026473	Glul	1.382574223	1.072004199	1.126591368	1.462370621	1.174792728	0.894034038	1.181161752	0.728699138	1.217058945	0.68480532
ENSMUSG00000100014	Gm29290	0	0	0	0	0	0	0	0	0	0
ENSMUSG00000101903	Gm29291	0	0	0	0	0	0	0	0	0	0
ENSMUSG00000100502	Gm28286	0.003366596	0.002478271	0.013537992	0	0	0	0	0	0	0
ENSMUSG00000100627	A830008E24Rik	0.096772735	0.091701701	0.019128107	0.046042738	0.009760059	0.010998487	0.035925509	0.022903211	0.028424232	0.059363387
ENSMUSG00000066797	Zfp648	0	0	0	0	0	0	0	0	0	0
ENSMUSG00000099933	4930452N14Rik	0	0	0	0	0	0	0	0	0	0
ENSMUSG00000100221	4930532M18Rik	0	0	0	0	0	0	0	0	0	0
ENSMUSG00000004110	Cacna1e	0.003352862	0.013248847	0.019441219	0	0.024071564	0	0.016128694	0.042957541	0	0
ENSMUSG00000101880	Gm29282	0.003432986	0	0	0.006252141	0	0	0	0	0	0
ENSMUSG00000096950	Gm9530	0	0	0	0	0	0	0	0	0	0
ENSMUSG00000056708	Ier5	0.13233767	0.206019219	0.178495769	0.175111642	0.129914892	0.129991605	0.137356676	0.337918993	0.137029038	0.318278119
ENSMUSG00000026471	Mr1	0.140104282	0.114602346	0.174455851	0.181151273	0.066021177	0.312448948	0.156796621	0.082905315	0.048394244	0.077622215
ENSMUSG00000026470	Stx6	0.280114726	0.32637823	0.256168131	0.259236409	0.200730013	0.27176052	0.219121922	0.628732193	0.588621054	0.318281755
ENSMUSG00000033722	BC034090	0.275149279	0.302051806	0.389248115	0.1917146	0.332634624	0.16787161	0.28824055	0.182972264	0.323759956	0.273337403
ENSMUSG00000103670	Gm37622	0	0	0	0	0	0	0	0	0	0
ENSMUSG00000026469	Xpr1	0.703566916	0.794855729	0.610505988	0.577971142	0.732001423	0.782769166	0.724887262	0.899787784	1.647061952	0.575314925
ENSMUSG00000073535	Gm5532	0.086552363	0.085466665	0.072318477	0.322660872	0.085119145	0.091411688	0.090640876	0.048011264	0.068183754	0
ENSMUSG00000033701	Acbd6	0.655339119	0.800693103	0.633381158	0.594885487	0.708337194	0.762145441	0.545776041	0.892399505	0.465633488	1.030984216
ENSMUSG00000026468	Lhx4	0.003576312	0.001906749	0	0	0	0	0	0	0	0
ENSMUSG00000033684	Qsox1	0.680344695	0.463409818	0.82077618	0.569085796	0.46264404	0.941514718	0.448692945	0.749613104	0.582336076	0.442210811
ENSMUSG00000102558	Gm37571	0.044947524	0.144459161	0.11747897	0.02458747	0.070887623	0.090194683	0.073296558	0.126773899	0	0.070160154
ENSMUSG00000033671	Cep350	1.715875346	2.078680071	1.482690685	0.944308032	1.776641893	1.490985308	1.559998951	1.371725681	1.345450842	1.56503412
ENSMUSG00000026466	Tor1aip1	1.849245063	1.601806551	1.531751932	1.457044829	1.636295867	1.719311297	1.562335006	1.366659351	1.446006198	2.399876334
ENSMUSG00000050565	Tor1aip2	0.505143838	0.496979064	0.522156498	0.548127895	0.30491182	0.479058887	0.535094499	0.392124943	0.131388161	0.894821865
ENSMUSG00000015484	Fam163a	0	0.003204684	0	0	0	0	0	0	0	0
ENSMUSG00000060985	Tdrd5	0.003048096	0.006536419	0	0	0	0	0	0	0	0
ENSMUSG00000103705	4930518J20Rik	0	0	0	0	0	0	0	0	0	0
ENSMUSG00000026602	Nphs2	0	0	0	0	0	0	0	0	0	0
ENSMUSG00000026601	Axdnd1	0.007796266	0.005521756	0.008892976	0	0.00881107	0	0.031867355	0	0.055536272	0
ENSMUSG00000078193	Gm2000	0.120371339	0.09633627	0.118760752	0.218562653	0.072696937	0.0743967	0.090894924	0.1888066	0.066722269	0.080997677
ENSMUSG00000026600	Soat1	0.426713891	0.425964135	0.431151912	0.400205786	0.383183891	0.530222206	0.785889967	0.335359462	0.412421143	0.87014627
ENSMUSG00000026596	Abl2	0.67759367	0.783735368	0.782150646	0.488332897	0.830805491	0.811234173	0.796775374	0.933093249	0.851795645	0.503135307
ENSMUSG00000060519	Tor3a	0.319173257	0.27981443	0.286532434	0.24516257	0.285202131	0.385538494	0.258830934	0.353831973	0.180909703	0.739380919
ENSMUSG00000033557	Fam20b	0.284920445	0.327134789	0.370934455	0.305859532	0.253116002	0.319180632	0.426246117	0.193389844	0.275950669	0.463732788
ENSMUSG00000026594	Ralgps2	0.141351446	0.170667438	0.100108039	0.135267259	0.312678482	0.078393339	0.10274753	0.170837469	0.093818753	0.108794066
ENSMUSG00000033544	Angptl1	0.519755856	0.433790192	0.311068415	0.3621534	0.384627704	0.838933946	0.213359803	0.344839067	0.236717906	0.36211854
ENSMUSG00000101905	4930439D14Rik	0	0	0	0	0	0	0	0	0	0
ENSMUSG00000101768	Gm28694	0	0	0	0	0	0	0	0	0	0
ENSMUSG00000026592	Tex35	0	0.002213298	0	0	0	0	0	0	0	0
ENSMUSG00000070565	Rasal2	1.368923302	1.820669756	1.140698597	1.165511478	1.375282814	1.795661536	1.390356196	2.8792714	1.379802723	2.239583214
ENSMUSG00000033488	Cryzl2	0.065553714	0.079181196	0.051809141	0.123093599	0.051249236	0.072342337	0.059352529	0.068580556	0.021557532	0.109124764
ENSMUSG00000087093	Gm15486	0.108226888	0.134784163	0.101178023	0.00857316	0.046048385	0.048859571	0.045616137	0.099418059	0.079410397	0.039668058
ENSMUSG00000026589	Sec16b	0.951049759	1.219229804	0.734688184	0.493885527	1.014513187	0.870172509	0.685280699	0.641023407	0.338958495	0.770210927
ENSMUSG00000004031	Brinp2	0.003233466	0.006141162	0	0	0.039529129	0.023890752	0	0	0	0
ENSMUSG00000026587	Astn1	0	0.00414017	0	0.036272891	0	0	0	0.031320863	0.352183871	0
ENSMUSG00000103971	Gm37679	0.002484647	0	0	0.021784655	0	0	0.010096084	0	0.198396634	0
ENSMUSG00000073530	Pappa2	0.002162988	0	0	0.009937464	0	0	0.035884996	0.042713665	0.563634935	0
ENSMUSG00000047661	1600012P17Rik	0	0	0	0	0	0	0	0	0	0
ENSMUSG00000104014	4930562F17Rik	0	0.006307417	0	0	0	0	0	0	0.071361705	0
ENSMUSG00000040782	Cop1	1.238286078	1.626979575	1.331021218	1.013271451	1.592003737	1.648370082	1.608463968	1.234574199	1.444946163	1.593100982
ENSMUSG00000015829	Tnr	0.010901134	0.031563861	0	0	0.015779541	0.016942653	0.218948339	0	0.352112676	0
ENSMUSG00000103719	Gm38039	0	0	0	0	0	0	0	0	0	0
ENSMUSG00000104111	Gm37294	0	0	0	0	0	0	0	0	0	0
ENSMUSG00000090394	4930523C07Rik	0.995308969	0.954614325	1.142852474	0.769641241	1.137569594	1.236056883	1.280225457	1.152378816	1.615786358	1.121670456
ENSMUSG00000026729	4930562F07Rik	0	0.013290456	0	0	0	0	0	0	0	0
ENSMUSG00000026725	Tnn	0.007596567	0.00794823	0	0	0	0	0.018595518	0	0.053944707	0.022426352
ENSMUSG00000058267	Mrps14	0.749934534	0.687614119	0.577768639	0.786925816	0.698398338	0.58737972	0.444060565	0.870906185	0.872532036	0.763868483
ENSMUSG00000014226	Cacybp	0.492538235	0.556980545	0.519301098	0.629971336	0.388347013	0.482290419	0.388210634	0.758754533	0.391272277	0.209514104
ENSMUSG00000026721	Rabgap1l	2.351617292	2.805216945	2.400185603	1.850520804	3.72192863	3.574633853	2.772029951	2.254085959	5.321061534	2.079547419
ENSMUSG00000104302	Gm36975	0.727551875	0.917543802	0.768798558	0.411940566	0.919477664	0.837040072	0.803503042	0.879452181	1.183020366	0.685075968
ENSMUSG00000118401	Gpr52	0	0	0	0.008332285	0	0	0	0	0	0
ENSMUSG00000102852	Gm37083	0	0	0.005139406	0	0.009594424	0	0	0	0	0
ENSMUSG00000103631	Gm38060	0	0	0	0.024661946	0	0	0	0	0	0
ENSMUSG00000040423	Rc3h1	1.229616402	1.336886924	1.107573978	1.235402918	0.849890395	1.443319706	1.332517556	1.196562046	1.402442625	1.438795917
ENSMUSG00000026715	Serpinc1	0.047655831	0.088459031	0.050074436	0.059090083	0.052099064	0.091821077	0.069653168	0.037806522	0.084703042	0.067791242
ENSMUSG00000043467	Zbtb37	0.32628643	0.400203312	0.235555061	0.241491261	0.215998431	0.289579024	0.393073688	0.284697514	0.421809021	0.276275744
ENSMUSG00000104016	Gm37362	0.004336986	0.001619393	0	0	0.014253542	0	0.028263717	0	0	0
ENSMUSG00000026709	Dars2	0.099856317	0.084273007	0.084702495	0.081383785	0.09310975	0.138177131	0.205245806	0.057365894	0	0.07855506
ENSMUSG00000102864	Gm37634	0	0	0	0	0	0	0	0	0	0
ENSMUSG00000026708	Cenpl	0.037144296	0.035141808	0.036994159	0.041117211	0.103306568	0.041572983	0	0.087895005	0	0
ENSMUSG00000026705	Klhl20	0.306087846	0.306212539	0.237157316	0.225963656	0.383412469	0.144858519	0.130390499	0.201712801	0.199024197	0.348574055
ENSMUSG00000044835	Ankrd45	0.007214168	0.006251707	0.003553897	0.004909932	0	0.018198826	0	0	0	0.036050586
ENSMUSG00000049160	Tex50	0	0	0	0.005506296	0	0	0	0	0.053315561	0
ENSMUSG00000026701	Prdx6	0.641257802	0.685491846	0.569072568	0.878225829	0.577923647	0.610707132	0.611251679	0.582065869	0.664395913	0.64606326
ENSMUSG00000026700	Tnfsf4	0	0	0	0	0	0	0	0	0	0
ENSMUSG00000066755	Tnfsf18	0	0	0.002803594	0	0.012976632	0	0	0	0	0
ENSMUSG00000000817	Fasl	0	0	0	0	0	0	0	0	0	0
ENSMUSG00000040297	Suco	0.829773921	0.980301263	0.894686558	0.654269581	0.834666601	0.697212057	0.695393086	0.552663045	1.191097154	0.651366189
ENSMUSG00000103158	Gm31925	0	0	0	0	0	0	0	0	0	0
ENSMUSG00000086277	4930558K02Rik	0.015230275	0.001724542	0.006428935	0.010325401	0.02964208	0	0	0	0	0
ENSMUSG00000026698	Pigc	0.249014513	0.18885782	0.167177613	0.229952726	0.107990868	0.12414471	0.085357841	0.128488568	0.21575436	0.184394369
ENSMUSG00000103393	Gm38304	0.157957842	0.152487605	0.07800467	0.065792117	0.081799913	0.128552574	0.11323886	0.136690838	0.032044863	0.161225061
ENSMUSG00000040265	Dnm3	1.82508546	2.265977007	1.235609344	0.926526219	1.148070498	1.622619792	1.05852772	2.275604533	1.076664396	1.25076623
ENSMUSG00000090260	2810442N19Rik	0.002476665	0	0.003309258	0	0	0.020307303	0	0	0	0
ENSMUSG00000078190	Dnm3os	1.256544922	1.596641806	0.591158331	0.583870704	0.837146533	0.833406531	1.259180584	0.785717228	0.493366445	1.389917988
ENSMUSG00000026694	Eef1aknmt	0.108069284	0.09404677	0.069376619	0.083219403	0.06675265	0.135738859	0.105679272	0.024294488	0	0.01864197
ENSMUSG00000026696	Vamp4	0.808671561	0.853586634	0.859993436	0.624694135	0.773023285	0.926186259	0.722323948	0.692610444	0.732060046	0.55260553
ENSMUSG00000026697	Myoc	0.737401249	0.559997637	4.652105477	1.851735728	0.28547321	3.846613425	5.029372131	1.337266557	2.972241157	0.80386511
ENSMUSG00000091060	Myocos	0.00655873	0.006125411	0.008899165	0.017627946	0	0.028083892	0	0	0.033458804	0.020736735
ENSMUSG00000040225	Prrc2c	3.27398164	3.389689195	3.197348369	2.458265851	3.047942094	3.286743051	3.598261913	4.037194539	2.962508344	2.98382962
ENSMUSG00000026692	Fmo4	0.008268767	0.008014972	0.005800109	0	0	0.030773969	0	0	0	0
ENSMUSG00000040181	Fmo1	0.809639136	0.738252457	0.55431511	0.73036576	0.856723196	0.958734295	1.140378535	0.976162667	0.751971576	0.745091468
ENSMUSG00000040170	Fmo2	2.629528993	2.019546698	0.722413959	2.001718078	4.258975153	1.479724565	4.860011232	1.754331964	1.254104317	1.710142413
ENSMUSG00000095576	Fmo6	0.00508409	0	0	0.014742	0.023659455	0	0	0	0.03994009	0
ENSMUSG00000026691	Fmo3	0.00205118	0.014570038	0.010042893	0	0.231563915	0.013562044	0.052627509	0	0	0
ENSMUSG00000103288	Gm37273	0.001173186	0.004328934	0.002701808	0	0	0	0	0	0	0
ENSMUSG00000071890	Mroh9	0.003906361	0.007062447	0.005403616	0	0	0	0	0	0	0
ENSMUSG00000026586	Prrx1	1.422932986	1.629756307	1.785239736	1.238622277	2.479130099	1.15831014	1.915105332	1.118624159	1.535009433	1.335391414
ENSMUSG00000092188	Gm20471	0.02845322	0.016372636	0.040614383	0.010352203	0.054081847	0.031822821	0.041395733	0	0.047789725	0.105057251
ENSMUSG00000040124	Gorab	0.143948532	0.130949037	0.145955475	0.144991098	0.163306408	0.064189499	0.113842136	0.115696361	0.076373577	0.195555419
ENSMUSG00000101869	Gm29500	0	0	0	0	0	0	0	0	0	0
ENSMUSG00000040113	Mettl11b	0	0.004228788	0	0	0	0	0	0	0	0
ENSMUSG00000026585	Kifap3	0.813843153	1.039962109	0.978403937	0.487179445	0.976230964	0.885841116	1.156749527	0.844311005	1.108964243	0.552528708
ENSMUSG00000026584	Scyl3	0.220725865	0.213593812	0.248700138	0.175065294	0.208228604	0.169774253	0.120259341	0.236435036	0.277257677	0.433008291
ENSMUSG00000041406	BC055324	0.044839029	0.047100693	0.025874745	0.052951833	0.073538824	0.008748355	0.097318118	0	0.121499175	0.074898239
ENSMUSG00000041396	Mettl18	0.047102973	0.039771861	0.021411347	0.020610141	0.030772285	0.016866985	0	0.017188628	0	0.016724422
ENSMUSG00000026582	Sele	0.002089297	0.003385827	0	0	0	0	0	0.031721058	0	0.049125206
ENSMUSG00000026581	Sell	0	0.004282231	0	0	0	0	0	0	0	0
ENSMUSG00000026580	Selp	0.005618761	0.004211392	0.007008974	0	0	0	0	0.028548264	0.061491161	0
ENSMUSG00000090081	Gm16587	0	0	0	0	0	0	0	0	0	0
ENSMUSG00000086593	Gm16548	0	0	0	0	0	0	0	0	0	0
ENSMUSG00000026579	F5	0	0	0.00627879	0	0	0	0	0	0	0
ENSMUSG00000040918	Slc19a2	0.078855108	0.067373562	0.078927917	0.032755165	0.037291544	0.101577301	0.116092498	0.060294331	0.061921282	0.155324342
ENSMUSG00000026578	Ccdc181	0.038863913	0.049594549	0.047418119	0.07058783	0.09049198	0.135438355	0.011297303	0.051720244	0.041950708	0.035874182
ENSMUSG00000026577	Blzf1	0.273681107	0.329215055	0.264149824	0.193582685	0.278226676	0.307483044	0.48052863	0.171947415	0.365394226	0.231575309
ENSMUSG00000026575	Nme7	0.35334391	0.394035357	0.336942674	0.518555072	0.317089474	0.347006979	0.335399831	0.286123238	0.569594895	0.166674993
ENSMUSG00000026576	Atp1b1	0.27835302	0.33934714	0.256885599	1.237299182	0.377553044	0.300508933	0.613146657	0.547043061	0.785195789	0.41617823
ENSMUSG00000104011	Gm32391	0	0	0	0	0	0	0	0	0	0
ENSMUSG00000097281	Gm26685	0	0	0	0	0	0	0	0	0	0
ENSMUSG00000103383	Gm37754	0	0.004447576	0	0.010226204	0	0.016163967	0	0	0.069414317	0
ENSMUSG00000102897	Gm37853	0.009097997	0.004447576	0	0.039520006	0	0.014238443	0.032480492	0	0.123104948	0
ENSMUSG00000102761	Gm37184	0.003152251	0	0	0.007746948	0.013365839	0	0	0	0.077147182	0.01850084
ENSMUSG00000102163	Gm36945	0	0	0	0.003998561	0	0	0	0	0	0
ENSMUSG00000026574	Dpt	5.986173404	3.896944309	8.978704583	5.937970568	5.72699014	5.32769089	5.659444663	4.109273868	6.476235739	5.162177781
ENSMUSG00000103659	Gm32569	0.449872813	0.515601053	0.554805378	0.370752102	0.541173065	0.483428514	0.598461721	0.44150918	0.716116018	0.320857768
ENSMUSG00000026573	Xcl1	0	0.010759797	0.014014821	0	0.007694249	0	0	0	0	0
ENSMUSG00000101189	1700029M03Rik	0	0	0	0	0	0	0	0	0	0
ENSMUSG00000102408	4930568G15Rik	0	0	0	0	0	0	0	0	0	0
ENSMUSG00000026572	Tbx19	0	0	0	0	0	0	0	0	0	0
ENSMUSG00000040848	Sft2d2	0.126131023	0.144590383	0.134987169	0.189100513	0.144696759	0.195836973	0.234136053	0.181871936	0.312992165	0.216247261
ENSMUSG00000040843	Tiprl	0.499707055	0.542729853	0.530515961	0.40294424	0.369845643	0.477603371	0.407170488	0.381315499	0.379402212	0.574706529
ENSMUSG00000040836	Gpr161	0.094682926	0.118992224	0.151626332	0.114309951	0.1383151	0.13346782	0.081872835	0.120516424	0.104753288	0.116266244
ENSMUSG00000026571	Dcaf6	1.150073818	1.449387283	1.114998635	0.842717868	1.173861223	0.651913467	1.139166395	1.277457024	1.395692768	1.38812824
ENSMUSG00000026568	Mpc2	3.20224555	3.482907601	3.132773313	5.390409844	3.274642157	2.921833685	3.064898262	3.552882329	2.989065225	2.801375665
ENSMUSG00000026567	Adcy10	0.040934655	0.025163583	0.003839177	0	0.00881107	0.016082083	0.052953708	0	0	0.049309178
ENSMUSG00000103583	Gm38325	0	0	0	0	0	0	0	0	0	0
ENSMUSG00000026566	Mpzl1	0.297282214	0.254329295	0.264291886	0.286396991	0.440384972	0.341133177	0.490760003	0.506358874	0.788482184	0.434104578
ENSMUSG00000040723	Rcsd1	0.470217433	0.610899141	0.217479478	0.426973539	0.242236051	0.5625425	0.722985131	1.198760902	0.386442543	1.091301522
ENSMUSG00000103686	Gm37073	0	0	0	0	0	0	0	0	0	0
ENSMUSG00000040713	Creg1	1.355661056	0.827164608	1.200173993	1.985524287	0.963459911	1.446779411	0.8313542	0.782026738	0.867620211	0.874802093
ENSMUSG00000104306	Gm36972	0	0	0	0	0	0	0	0	0	0
ENSMUSG00000005763	Cd247	0.02413143	0.03710085	0.027486804	0.005792186	0.066337632	0.076170868	0.01168485	0.180800951	0	0.036050586
ENSMUSG00000102154	Gm37469	0	0	0	0	0	0	0	0	0	0
ENSMUSG00000026565	Pou2f1	0.953218355	1.046525495	0.93329427	0.698349441	1.064645452	0.897522209	0.860263374	0.686110044	1.253548942	0.798852265
ENSMUSG00000097196	Gm26665	0	0	0	0	0	0	0	0	0	0
ENSMUSG00000102484	Gm37923	0	0	0	0	0	0	0	0	0	0
ENSMUSG00000026564	Dusp27	0.051098328	0.072168752	0.022929875	0.134699805	0.121684229	0.053790374	0.02399261	0.055045744	0.155170338	0.081277722
ENSMUSG00000000544	Gpa33	0	0	0	0	0	0	0	0	0	0
ENSMUSG00000040629	Mael	0	0	0	0	0	0	0	0	0	0
ENSMUSG00000040612	Ildr2	0.112693325	0.073135413	0.247529812	0.223660068	0.262046801	0.072128022	0.280431378	0.130655594	0.241107743	0.057334026
ENSMUSG00000091393	5330438I03Rik	0	0	0	0	0	0	0	0	0	0
ENSMUSG00000103400	Gm15853	0.005672103	0.007869455	0.002894314	0.006691837	0	0	0	0.031508369	0	0.027304947
ENSMUSG00000026563	Tada1	0.124837647	0.086523379	0.092657059	0.113048868	0.121123922	0.144106154	0.087924583	0	0.103604101	0.192492326
ENSMUSG00000040596	Pogk	0.218990306	0.294482333	0.289316543	0.156199962	0.137144395	0.256121008	0.133167874	0.230623841	0.149727908	0.148004134
ENSMUSG00000086056	Gm4846	0	0	0	0	0	0	0	0	0	0
ENSMUSG00000051081	Gm4847	0	0	0	0	0	0	0	0	0	0
ENSMUSG00000026560	Fmo9	0	0.004680491	0	0	0	0	0	0	0	0
ENSMUSG00000102548	Gm16701	0.005516774	0	0.009818341	0	0.014457553	0	0.018435762	0	0.085482082	0
ENSMUSG00000097823	Gm16701	0.00567087	0.013448439	0.012771827	0	0.028215112	0	0.019041018	0	0.050681026	0
ENSMUSG00000060568	Fam78b	0.24001958	0.311429352	0.218778518	0.071131859	1.087565816	0.168275466	0.624988259	0.430378098	1.697442162	0.237280648
ENSMUSG00000026558	Uck2	0.047283476	0.083456882	0.029370311	0.084080539	0.011111407	0.157914981	0.061790896	0	0.027215513	0.025336212
ENSMUSG00000103139	Gm37982	0.008864042	0.015913598	0.02396125	0.011487149	0	0.045240332	0	0	0	0
ENSMUSG00000102909	Gm2453	0	0.00296349	0	0	0	0	0	0	0	0
ENSMUSG00000052428	Tmco1	1.233086379	0.917180161	1.085023053	1.304767196	1.013248889	0.956497486	1.11673088	1.011337324	0.617527524	1.282364472
ENSMUSG00000026687	Aldh9a1	0.163216454	0.197790937	0.097629342	0.159607612	0.110228521	0.026385491	0.118772068	0.231915765	0.201094521	0.32521276
ENSMUSG00000026688	Mgst3	1.06388386	1.501751994	1.140717885	2.371097122	1.275831373	1.085353728	1.101518026	1.501468615	1.355313357	1.424510012
ENSMUSG00000040485	Lrrc52	0.002101501	0.001457203	0	0	0	0	0.034001549	0	0	0
ENSMUSG00000015843	Rxrg	0.083940606	0.089763971	0.038154057	0.219850396	0.161450058	0	0.11773292	0.069408165	0.020749579	0.039668058
ENSMUSG00000026686	Lmx1a	0.002810026	0.007624316	0.026469431	0.00959482	0.046164049	0	0	0	0	0
ENSMUSG00000093538	Gm20711	0	0.01223782	0.002733566	0	0.060172816	0	0	0	0	0
ENSMUSG00000052534	Pbx1	4.847884943	5.234680836	3.849276505	3.437830495	8.062053603	4.263544367	4.378776572	3.716360734	3.085386605	4.122603355
ENSMUSG00000103530	Gm37839	0	0	0	0	0	0	0	0	0	0
ENSMUSG00000026683	Nuf2	0.014228326	0	0.015852634	0	0.00792775	0	0.021142096	0	0	0
ENSMUSG00000026678	Rgs5	0.449441611	0.57507086	0.371169333	0.746066153	0.496973731	0.577039587	0.485749612	1.419980409	0.794926206	2.702877864
ENSMUSG00000038530	Rgs4	0.019979368	0.049328715	0.018124463	0.070532264	0	0.055815532	0.041440603	0.041910682	0.082352784	0.285735745
ENSMUSG00000070532	Ccdc190	0.002735253	0	0	0	0	0	0	0	0	0
ENSMUSG00000026675	Hsd17b7	0.064607873	0.063690719	0.130538389	0.095225386	0.073793644	0.107377155	0.0352033	0.015367782	0	0
ENSMUSG00000097503	3110045C21Rik	0.013366172	0.010517186	0.014674566	0.027687228	0	0.010765746	0	0	0	0.01864197
ENSMUSG00000026674	Ddr2	2.685161112	2.959749385	3.658258424	1.799676675	3.249596269	2.584372647	2.242626421	1.843076412	1.920687126	2.928973878
ENSMUSG00000026670	Uap1	0.610557648	0.922666947	2.751750009	0.684457598	0.756485333	1.391535135	0.721985975	1.150632091	0.557829971	1.429611109
ENSMUSG00000104266	Gm37748	0.005239432	0.003421225	0	0	0	0.037527459	0	0	0	0
ENSMUSG00000103908	Gm37502	0.003097964	0	0	0	0.022248921	0	0	0	0	0
ENSMUSG00000026667	Uhmk1	0.282332826	0.266498538	0.222063566	0.188024271	0.216796828	0.217483962	0.076131342	0.239053252	0.222921444	0.26825529
ENSMUSG00000044306	4930500M09Rik	0.00365627	0.005222522	0	0	0	0	0	0	0	0
ENSMUSG00000073494	Sh2d1b2	0	0	0	0	0	0	0	0	0	0
ENSMUSG00000102418	Sh2d1b1	0.003164043	0	0	0	0	0	0	0	0	0
ENSMUSG00000102752	Gm7694	0.005350505	0.00698201	0.00395171	0.030369003	0.013365839	0	0	0	0.048105833	0
ENSMUSG00000038473	Nos1ap	0.096456713	0.147552541	0.079177111	0.127363988	0.182507213	0.09553748	0.168474983	0.385194784	0.76161555	0.045052832
ENSMUSG00000042800	Spata46	0	0.004281135	0	0	0.015163646	0	0	0	0.0269179	0
ENSMUSG00000038463	Olfml2b	0.358454466	0.153106419	0.520183223	0.429784926	1.721807403	0.917649393	2.005385691	0.466378203	1.409371189	0.207994061
ENSMUSG00000026663	Atf6	1.041391717	0.958145967	0.895873765	0.850000227	0.987566246	1.014260805	0.89913354	0.899206695	1.118078358	1.080142431
ENSMUSG00000026659	Dusp12	0.28691163	0.329201222	0.274220467	0.232644208	0.261250418	0.270237678	0.235155248	0.310915133	0.333481384	0.355634509
ENSMUSG00000096968	Gm26620	0.010246685	0.007533031	0.007390222	0	0	0.008480987	0	0	0.025493945	0
ENSMUSG00000070524	Fcrlb	0	0	0	0	0	0	0	0	0	0
ENSMUSG00000038421	Fcrla	0.007926938	0.007334001	0.022676041	0.042962116	0.016925285	0.010404441	0	0	0	0.076617256
ENSMUSG00000026656	Fcgr2b	0.034339922	0.01158515	0.020260977	0.0462217	0.032659128	0	0.040311011	0.039266055	0.056278579	0.027304947
ENSMUSG00000103676	Gm38204	0	0.002117575	0.003170527	0	0	0	0	0	0	0
ENSMUSG00000104340	Gm10522	0	0	0	0	0	0	0	0	0	0
ENSMUSG00000059089	Fcgr4	0	0	0.002520955	0	0	0	0	0	0	0
ENSMUSG00000059498	Fcgr3	0.032520552	0.053883662	0.031226946	0.067367719	0.060299065	0.046740329	0.078964358	0.018568861	0	0
ENSMUSG00000026649	Cfap126	0.029875732	0.008415527	0.021639175	0	0.035976445	0	0	0.048721138	0	0
ENSMUSG00000058076	Sdhc	1.079644919	1.193005727	0.989418072	2.019494168	1.047141969	0.940019349	1.252707009	1.140793388	1.289404537	0.770165294
ENSMUSG00000056569	Mpz	0	0	0.004924471	0	0	0	0	0	0	0
ENSMUSG00000038370	Pcp4l1	0.20880764	0.283033491	0.227229916	0.401852675	0.076431553	0.166911737	0.269447638	0.305620239	0.104125131	0.165835065
ENSMUSG00000005677	Nr1i3	0.012684462	0.00717054	0.012750891	0.020584731	0	0	0.022889843	0.061876019	0.021557532	0.044184212
ENSMUSG00000005674	Tomm40l	0.090938874	0.109146526	0.084548942	0.044069472	0.061961605	0.158919732	0.02768117	0.198355825	0.094909367	0.09721443
ENSMUSG00000005681	Apoa2	0.001475302	0.006827245	0.002520955	0	0	0	0	0.016934227	0	0
ENSMUSG00000058715	Fcer1g	0.094825672	0.103049572	0.066457191	0.166369494	0.157337506	0.030280606	0.043910647	0.201351283	0.241388722	0.016669111
ENSMUSG00000013593	Ndufs2	1.58319632	1.58229184	1.297524997	3.60624912	1.700542829	1.287731798	1.747186724	2.057436151	1.607376011	1.842681663
ENSMUSG00000006403	Adamts4	0.056353049	0.059037695	0.027610997	0.005866665	0.030672787	0.012575674	0.024252452	0.090372888	0	0.035311081
ENSMUSG00000052423	B4galt3	0.143107974	0.12201103	0.136169462	0.088848844	0.081787167	0.07093242	0.087505419	0.072741822	0.366702814	0.115907678
ENSMUSG00000062729	Ppox	0.152279309	0.156889157	0.133396766	0.073533505	0.04013641	0.131938826	0.064344028	0.047934043	0.213247848	0.136505026
ENSMUSG00000053483	Usp21	0.08074558	0.111254631	0.07056738	0.051270108	0.094575189	0.081205284	0.084835347	0.160477587	0.033347228	0.053258216
ENSMUSG00000062963	Ufc1	0.46544959	0.506723097	0.556554766	0.5262397	0.398170994	0.460817402	0.501944472	0.271492708	0.313519837	0.521713455
ENSMUSG00000103983	Gm20045	0.10146617	0.168795005	0.089766297	0.134214514	0.211346518	0.181324132	0.141802371	0.141688218	0.11395343	0.129294753
ENSMUSG00000013973	Dedd	0.142034175	0.176010881	0.134720746	0.089337656	0.191313101	0.280403993	0.186532663	0.195176132	0.298187337	0.189815294
ENSMUSG00000013997	Nit1	0.283216389	0.318550417	0.27666828	0.19354645	0.487473055	0.287070885	0.28419483	0.350783555	0.229428778	0.44227436
ENSMUSG00000006412	Pfdn2	0.495367265	0.440629552	0.4322139	0.58504725	0.657714	0.421522723	0.424786063	0.354787097	0.385269708	0.610320992
ENSMUSG00000045259	Klhdc9	0.009705475	0.001525916	0.010421934	0.031109551	0	0.021118967	0.031049987	0.018568861	0	0
ENSMUSG00000006411	Nectin4	0.003426618	0	0.009909413	0.004034829	0	0.010701872	0	0	0	0
ENSMUSG00000048865	Arhgap30	0.015141769	0.012392143	0.004738831	0.089049517	0.028567831	0.014929473	0.053095497	0	0.028139289	0.016724422
ENSMUSG00000026641	Usf1	0.098343168	0.100696311	0.12126868	0.097116855	0.195750016	0.105951171	0.18437684	0.22776433	0.076528454	0.200739104
ENSMUSG00000103711	Tstd1	0.010706841	0.011140193	0.008031544	0.00872235	0.012484769	0	0.027420498	0	0.049367479	0
ENSMUSG00000038235	F11r	0.054735077	0.043881327	0.031846948	0.106332321	0.045251603	0.022202393	0.022889843	0.221179171	0.023021583	0
ENSMUSG00000091993	B930036N10Rik	0.005794326	0.007838754	0.01352985	0	0.014315491	0	0	0.018034395	0	0.044092488
ENSMUSG00000060244	Alyref2	0.071621732	0.065760195	0.066661912	0.087827548	0.060475055	0.058209727	0.08562539	0.073788495	0.044198895	0.06946181
ENSMUSG00000038209	Itln1	0	0	0	0	0	0	0	0	0	0
ENSMUSG00000004709	Cd244a	0.002280919	0.002896415	0.006335793	0.012504283	0	0	0	0	0	0
ENSMUSG00000004707	Ly9	0	0.003095454	0	0.012237685	0.027638663	0	0.035294782	0	0	0
ENSMUSG00000038179	Slamf7	0	0.003439603	0.002329658	0	0	0	0	0	0	0
ENSMUSG00000103219	Gm37787	0	0	0	0	0	0	0	0	0	0
ENSMUSG00000015355	Cd48	0.014702696	0.010540013	0.008805645	0.05152977	0	0.010320556	0.016507098	0	0	0
ENSMUSG00000015316	Slamf1	0.001066954	0	0	0	0.030327292	0	0	0	0	0
ENSMUSG00000038147	Cd84	0.010623782	0.011647463	0.00327662	0.061198407	0.00792775	0	0.023803913	0	0	0
ENSMUSG00000073492	Gm10521	0	0	0	0	0	0	0	0	0	0
ENSMUSG00000104413	Gm37065	0	0	0	0	0	0	0	0	0	0
ENSMUSG00000015314	Slamf6	0	0	0	0	0	0	0	0	0	0
ENSMUSG00000026556	Vangl2	0.096637419	0.117644048	0.109174517	0.07270194	0.100113531	0.051780826	0.097064146	0.03632509	0.056397603	0.076878513
ENSMUSG00000051251	Nhlh1	0	0	0	0	0	0	0	0	0	0
ENSMUSG00000003458	Ncstn	0.722840773	0.602171146	0.725516491	0.504642883	0.640715897	0.684163927	0.362041684	0.544191894	0.518690566	0.342893977
ENSMUSG00000026553	Copa	1.998479739	2.230164249	1.836106614	1.320860731	1.991184347	1.974722722	1.610246965	1.638179551	1.248016483	1.594663876
ENSMUSG00000103380	Gm37756	0.026120148	0.036256941	0.015985583	0	0.008780433	0.018020308	0.015984527	0	0	0.03209119
ENSMUSG00000003464	Pex19	0.324034658	0.343606133	0.278776058	0.360529138	0.452332057	0.241181482	0.229045512	0.321352029	0.30793744	0.304931303
ENSMUSG00000026554	Dcaf8	1.236143368	1.473331743	0.990262376	1.053070345	1.092134353	0.920939553	1.024149299	0.999658517	1.403638036	0.883229183
ENSMUSG00000013698	Pea15a	0.694191863	0.607611736	0.687894371	0.566478914	0.563109659	0.688403532	0.628921382	0.786753528	0.620370669	0.596392472
ENSMUSG00000007122	Casq1	0.004347624	0.017609983	0.017285875	0.01607824	0.02255361	0	0	0	0	0
ENSMUSG00000092085	Gm17224	0.002981577	0.002136862	0	0	0	0	0	0	0	0
ENSMUSG00000007107	Atp1a4	0	0	0	0	0	0	0	0	0	0
ENSMUSG00000103617	Gm37950	0	0	0	0	0	0	0	0	0	0
ENSMUSG00000038034	Igsf8	0.929131933	0.740643042	1.236065244	0.82016149	1.113580555	0.939737554	0.81136357	0.847797308	0.467926603	0.586430028
ENSMUSG00000007097	Atp1a2	3.674636615	2.900659941	2.325707973	3.477768723	2.902336026	2.092593068	2.533093326	2.337743568	1.699897799	2.208775632
ENSMUSG00000038026	Kcnj9	0.00383792	0.008793257	0.013164234	0.009561308	0.065337529	0	0	0.02413407	0.047789725	0
ENSMUSG00000102413	Gm36937	0	0	0	0	0	0	0	0	0	0
ENSMUSG00000044708	Kcnj10	0	0	0	0	0	0	0	0	0	0
ENSMUSG00000050229	Pigm	0.117980601	0.15526415	0.119632302	0.0454461	0.116712562	0.171558522	0.127758488	0.048827351	0.293866265	0.160186241
ENSMUSG00000026548	Slamf9	0.01422869	0.017509946	0.003151194	0.023888676	0.016951796	0.010650172	0	0	0	0
ENSMUSG00000037995	Igsf9	0.021323399	0.001970474	0.006149963	0.013847155	0.060203541	0.013451708	0	0	0	0
ENSMUSG00000026547	Tagln2	0.601167864	0.539417797	1.046319056	1.024546831	0.510640889	1.497023451	1.062141862	1.053398435	1.372256528	0.859486421
ENSMUSG00000026546	Cfap45	0.006579701	0	0	0	0	0.008202261	0	0	0	0
ENSMUSG00000049598	Vsig8	0.003083729	0.008327954	0.002255656	0	0	0	0.016977237	0	0	0
ENSMUSG00000053318	Slamf8	0.00242919	0.004468754	0.003452979	0.020596233	0	0	0.014159833	0	0	0
ENSMUSG00000070504	Fcrl6	0	0	0	0	0	0	0	0	0	0
ENSMUSG00000026544	Dusp23	0.184491977	0.16942707	0.168007449	0.12856205	0.166535634	0.256987945	0.205890143	0.183717974	0.198868581	0.216970665
ENSMUSG00000037942	Crp	0.001894227	0.001525916	0	0	0	0	0.022768411	0	0	0
ENSMUSG00000026542	Apcs	0	0	0	0	0	0	0	0	0	0
ENSMUSG00000037924	Olfr16	0	0	0	0	0	0	0	0	0	0
ENSMUSG00000062527	Olfr1408	0	0	0	0	0	0	0	0	0	0
ENSMUSG00000058981	Olfr1406	0	0	0	0	0	0	0	0	0	0
ENSMUSG00000046643	Olfr218	0	0	0	0	0	0	0	0	0	0
ENSMUSG00000049456	Olfr1404	0	0	0	0	0	0	0	0	0	0
ENSMUSG00000005339	Fcer1a	0	0	0	0	0	0	0	0	0	0
ENSMUSG00000049605	Olfr418	0	0	0	0	0	0	0	0	0	0
ENSMUSG00000079180	Mptx2	0	0	0	0	0	0	0	0	0	0
ENSMUSG00000037872	Ackr1	0.001678064	0.002677428	0.07893208	0.020835591	0.012870808	0	0.011342086	0	0	0.021852096
ENSMUSG00000005338	Cadm3	0.073981639	0.020501923	0.50166964	0.096496402	0.138653431	0.140505655	0.027695089	0.051002793	0.031891569	0.057200411
ENSMUSG00000037860	Aim2	0.161864164	0.139048405	0.156433452	0.048876407	0.063336501	0.106515315	0.091748231	0.076822993	0	0.122415246
ENSMUSG00000037849	Ifi206	0.008382822	0.027008089	0	0.01176825	0.029694879	0	0	0	0	0
ENSMUSG00000070501	Ifi214	0.001846904	0	0.002391958	0	0	0	0	0	0	0
ENSMUSG00000073491	Ifi213	0.007506039	0.011237322	0.01211719	0.021548437	0.039459763	0	0.026509237	0.084002833	0	0.053459975
ENSMUSG00000043263	Ifi209	0.010861753	0.012985494	0.008364901	0	0.085865623	0.011115557	0.009857247	0	0	0.039903593
ENSMUSG00000066677	Ifi208	0.001338124	0.01090656	0.010669256	0.010990484	0	0	0	0.061188864	0.029861889	0.028668738
ENSMUSG00000073490	Ifi207	2.654403794	2.399017649	1.662281579	1.363586475	2.301063414	1.006838835	0.742956159	1.559515135	0.411939899	3.759371915
ENSMUSG00000073489	Ifi204	0.947081847	0.7945111	0.80736859	0.50736707	1.534823481	0.33609923	0.101667813	0.499083578	0.098168409	2.202177974
ENSMUSG00000090272	Mndal	1.717320012	1.642620748	0.853589107	0.860477502	1.509262792	1.076465924	1.058259142	2.000848079	0.217707809	4.756408141
ENSMUSG00000026536	Ifi211	1.138384151	0.981776786	0.725008432	0.77088341	0.736808649	0.595850395	0.373842245	0.802760251	0	2.299041565
ENSMUSG00000039997	Ifi203	2.888756626	2.934519874	1.406296115	1.466844271	1.908792646	2.116480277	1.411118519	2.354251989	0.195634136	8.313206879
ENSMUSG00000026535	Ifi202b	0.009255225	0.002364818	0	0.04262439	0.018958352	0	0	0	0.037011335	0
ENSMUSG00000054203	Ifi205	4.288370412	3.411009787	2.283844033	1.962661086	2.249740337	1.009044111	0.766898376	2.051723379	0.240532561	4.402309631
ENSMUSG00000045381	Olfr433	0.001901569	0	0	0	0	0	0	0	0	0
ENSMUSG00000047048	Olfr432	0.001739173	0	0	0	0	0	0	0.031921142	0	0
ENSMUSG00000050134	Olfr430	0	0	0	0	0	0	0	0	0	0
ENSMUSG00000049528	Olfr429	0	0	0	0	0	0	0	0	0	0
ENSMUSG00000059371	Olfr427	0	0	0	0	0	0	0	0	0	0
ENSMUSG00000046486	Olfr231	0	0	0	0	0	0	0	0	0	0
ENSMUSG00000051528	Olfr424	0	0	0	0	0	0	0	0	0	0
ENSMUSG00000055033	Olfr420	0.004097687	0.003258467	0	0	0	0	0	0	0	0
ENSMUSG00000026532	Spta1	1.020128559	0.449131958	0.204802551	0.32585489	0.52935822	0.221686988	0.086663984	0.285514326	0.177311451	0.58622743
ENSMUSG00000050788	Olfr419	0.00635669	0	0.003380206	0	0	0	0	0	0	0
ENSMUSG00000026531	Mptx1	0	0	0	0	0	0	0	0	0	0
ENSMUSG00000066672	Olfr417	0	0	0	0	0	0	0	0	0	0
ENSMUSG00000059503	Olfr248	0	0	0	0	0	0	0	0	0	0
ENSMUSG00000051509	Olfr414	0	0	0	0	0	0	0	0	0	0
ENSMUSG00000066671	Olfr220	0	0	0	0	0	0	0	0	0	0
ENSMUSG00000028354	Fmn2	0.144426412	0.15700046	0.266840733	0.028448034	0.062971328	0.020444379	0.052936975	0.083046487	0	0.019297717
ENSMUSG00000050069	Grem2	0	0	0	0	0.044881553	0	0	0	0	0
ENSMUSG00000026527	Rgs7	0.525828843	0.666388876	0.074573468	0.190360151	0.538159314	0.19064676	0.237355805	0.092441148	0.186103103	0.314445558
ENSMUSG00000103079	Gm36307	0	0	0	0	0	0	0	0	0	0
ENSMUSG00000026526	Fh1	0.605737926	0.611767644	0.586147408	1.178335077	0.550928815	0.447830449	0.309316196	0.848795259	1.209162528	0.255596696
ENSMUSG00000039783	Kmo	0.140700928	0.127110652	0.111289111	0.073311073	0.09078392	0.104174252	0.128712502	0.124346454	0.107267756	0.18458833
ENSMUSG00000026525	Opn3	0.050840815	0.073297748	0.09816695	0.077375124	0.032486491	0.037971805	0.05591228	0.054212121	0	0.065041501
ENSMUSG00000078185	Chml	0.128467	0.120818154	0.136123041	0.090703446	0.078211777	0.10296089	0.120681147	0.02127732	0.094861558	0.110088024
ENSMUSG00000026523	Wdr64	0	0	0.002754612	0	0	0	0.009381083	0	0	0.028668738
ENSMUSG00000039748	Exo1	0.007658053	0.001613824	0	0	0	0	0.026362687	0	0	0
ENSMUSG00000104158	Gm38100	0.001688565	0	0	0	0	0	0	0	0	0
ENSMUSG00000055214	Pld5	0	0.004753682	0	0.013852545	0	0	0	0.03607868	0	0.044777991
ENSMUSG00000078184	Rbm8a2	0	0	0	0	0	0	0	0	0	0
ENSMUSG00000104157	Gm38101	0	0	0	0	0	0	0	0	0	0
ENSMUSG00000104021	Gm36536	0	0	0	0	0	0	0	0	0	0
ENSMUSG00000057335	Cep170	1.628460855	2.31871767	2.36009747	0.989134435	1.618747624	2.045409518	1.227978578	1.727197847	1.219251268	1.750472795
ENSMUSG00000103435	Gm36992	0.195002324	0.264512545	0.251303377	0.102336042	0.127349477	0.262884004	0.161695382	0.093196875	0.088131514	0.394084771
ENSMUSG00000026504	Sdccag8	1.45253573	1.796125979	1.668627938	0.683286996	1.459652173	1.211162822	1.20584831	0.985590984	1.202112469	1.253833625
ENSMUSG00000087082	Gm15423	0.014135791	0.012327161	0.007079501	0	0	0.028359614	0	0.026148439	0.023269343	0.044777991
ENSMUSG00000019699	Akt3	3.934289566	4.618493635	3.189621357	2.298954313	4.14772295	3.623931053	3.756003602	3.767420152	4.447108005	4.254098081
ENSMUSG00000097892	Gm26801	0.002781064	0.003766308	0.00191682	0	0	0	0	0	0	0
ENSMUSG00000063659	Zbtb18	0.106965265	0.139923507	0.125826804	0.144977637	0.179639917	0.112813994	0.201432367	0.150725841	0.090069205	0
ENSMUSG00000103043	Gm37306	0	0	0	0	0	0	0	0	0	0
ENSMUSG00000102885	Gm37280	0	0	0	0	0	0	0	0	0	0
ENSMUSG00000101746	2310043L19Rik	0	0	0	0	0	0	0	0	0	0
ENSMUSG00000015962	1700016C15Rik	0	0.00151016	0	0	0	0	0	0	0	0
ENSMUSG00000015961	Adss	0.26054308	0.281091609	0.274522445	0.316223075	0.339407473	0.348843281	0.426561616	0.332911199	0.302006185	0.199940755
ENSMUSG00000102483	Catspere1	0.002822781	0	0	0.024176079	0	0	0	0	0	0
ENSMUSG00000091476	Catspere2	0.205289273	0.227782006	0.143335708	0.087051819	0.153423767	0.099339412	0.225543824	0.184179877	0.223060131	0.179672137
ENSMUSG00000026502	Desi2	1.135506279	1.248590019	1.087061605	0.901182746	1.043923893	1.176961584	1.32622407	1.038317234	1.152140273	1.403022279
ENSMUSG00000086350	B230369F24Rik	0.072414515	0.069339705	0.027544074	0.079143071	0.046402583	0.085624971	0.047006862	0.114206947	0	0.091665874
ENSMUSG00000026500	Cox20	0.594830854	0.55598057	0.61739244	0.970730398	0.305617347	0.438450083	0.648843816	0.923279664	0.49779387	0.43543235
ENSMUSG00000039630	Hnrnpu	2.400260187	2.49062877	2.216611533	2.334476233	2.284801573	2.172678336	2.296772816	2.252669227	1.474076565	1.853038033
ENSMUSG00000026495	Efcab2	0.226949545	0.26330082	0.232469909	0.345505299	0.2213008	0.228773026	0.282604373	0.267971008	0.186746183	0.169090245
ENSMUSG00000026494	Kif26b	0.01041083	0.012173982	0.0022839	0	0.032339328	0.014716314	0.073122235	0.025870812	0.180444353	0
ENSMUSG00000089713	Gm16564	0	0	0	0.008385294	0	0	0	0	0	0
ENSMUSG00000055067	Smyd3	1.811692761	2.038016174	1.412319683	1.223904849	2.296037869	1.106932448	1.776530016	1.807112909	2.223913039	1.403983565
ENSMUSG00000026492	Tfb2m	0.185038913	0.301335026	0.219091494	0.212045607	0.201280109	0.234036187	0.252964909	0.236988583	0.452266909	0.273662085
ENSMUSG00000038949	Cnst	0.275427918	0.284927797	0.248012097	0.186306926	0.2218934	0.455995557	0.162031401	0.292291532	0.368510554	0.248325912
ENSMUSG00000038936	Sccpdh	0.183027944	0.207519993	0.132137718	0.245484419	0.260281474	0.230891791	0.140061039	0.15242169	0.285072145	0.303733033
ENSMUSG00000087236	Kif28	0.008611452	0.003653881	0.004322642	0.010866317	0.017447622	0.027177815	0	0	0	0
ENSMUSG00000026491	Ahctf1	1.111295198	1.171935266	0.968868093	0.769328813	1.188316028	1.006217324	0.934768393	1.209163734	0.752822694	1.196353445
ENSMUSG00000073486	Gm10518	0	0	0	0	0	0	0	0	0	0
ENSMUSG00000026490	Cdc42bpa	1.861916781	2.225137403	1.70567029	1.120279467	2.387437056	2.17518455	2.42536321	2.613938369	1.926160066	2.088489516
ENSMUSG00000026489	Coq8a	0.402798994	0.522743877	0.418707929	0.894604855	0.568836101	0.48250744	0.5157546	0.604431232	0.491731678	0.341830353
ENSMUSG00000104520	Gm37336	0.003983561	0.003146483	0.003410568	0	0	0	0	0	0	0
ENSMUSG00000010609	Psen2	0.407688146	0.313232446	0.50092609	0.321635266	0.291449501	0.369204806	0.314529841	0.368871791	0.26121198	0.384697253
ENSMUSG00000102923	Gm31728	0.028853507	0.028504993	0.019082728	0.055078175	0.011877952	0.015632279	0	0	0.044125758	0
ENSMUSG00000038855	Itpkb	0.580804865	0.733787495	0.537807942	0.554177014	0.860664503	0.711657624	0.85822163	2.63495766	1.303957881	0.992457926
ENSMUSG00000053963	Stum	0	0.027270551	0	0	0	0	0	0	0	0
ENSMUSG00000102608	Gm37267	0	0	0.002337268	0	0	0	0	0	0	0
ENSMUSG00000026496	Parp1	0.197891847	0.206965151	0.226225718	0.233520346	0.12647803	0.198481345	0.273910459	0.275634987	0.165647436	0.039756845
ENSMUSG00000058729	Lin9	0.096378398	0.114418721	0.065704226	0.021312884	0.058108225	0.134785425	0.027476604	0.04255464	0.062533099	0.06568434
ENSMUSG00000026497	Mixl1	0	0	0	0	0	0	0	0	0	0
ENSMUSG00000026499	Acbd3	1.1625822	1.307039698	1.051897836	0.949485744	1.17447656	1.099892697	1.089344442	1.119037693	0.540582969	0.960227975
ENSMUSG00000103649	Gm37768	0.439844581	0.644648034	0.430337771	0.229561096	0.595418737	0.342943434	0.387860955	0.429158037	0.281456025	0.487114583
ENSMUSG00000103156	Gm38293	0.022460099	0.015147291	0.009408757	0.011086352	0	0	0	0	0	0
ENSMUSG00000060743	H3f3a	2.03649207	2.015290312	1.994608296	3.099295584	1.41613728	2.141534566	2.007760852	2.398043261	2.017884568	1.530427143
ENSMUSG00000073485	H3f3aos	0.013854502	0.012810839	0.013046849	0	0.015756567	0	0	0.030475861	0.029861889	0.017512521
ENSMUSG00000038806	Sde2	0.278054004	0.261643369	0.242214142	0.305979498	0.246203397	0.355148588	0.401556284	0.198085444	0.304045789	0.365254566
ENSMUSG00000066652	Lefty2	0	0	0	0	0	0	0	0	0	0
ENSMUSG00000026520	Pycr2	0.16522548	0.174104937	0.15547345	0.087580371	0.122255496	0.222037203	0.118939365	0.015278559	0.098552331	0.127289454
ENSMUSG00000038793	Lefty1	0.086471334	0.066857121	0.119701163	0.109069075	0.046536685	0.055945619	0.129487217	0.056809058	0.088364706	0.071153151
ENSMUSG00000026519	Tmem63a	0.570559566	0.468236055	0.909194518	0.490882869	0.366515569	0.725355588	0.315185779	0.398650684	0.314464582	0.715874339
ENSMUSG00000085563	2210411M09Rik	0.022628339	0.022390049	0.035151942	0.035482718	0.048872125	0.008688973	0	0.027018264	0.128761758	0.077892508
ENSMUSG00000038776	Ephx1	0.859935749	0.648480667	1.118714381	0.929990207	0.72546024	1.250409005	1.031552089	0.557867666	1.072032803	0.778688832
ENSMUSG00000038768	9130409I23Rik	0	0	0	0	0	0	0	0	0	0
ENSMUSG00000103328	Gm37406	0	0	0	0	0	0	0	0	0	0
ENSMUSG00000026516	Nvl	0.891353897	0.945148491	0.726109892	0.517619204	0.872833058	0.732711839	0.677213718	0.571281453	0.632026768	0.956338298
ENSMUSG00000062169	Cnih4	0.767906043	0.609457422	0.821061449	1.034342088	0.728846415	0.677361063	0.641615984	1.003266671	0.668822201	0.640720949
ENSMUSG00000038733	Wdr26	1.059496402	1.24392911	1.067854232	0.92331939	1.325486557	1.188546879	1.323039527	1.503691595	1.950019593	1.207716282
ENSMUSG00000054135	A430110L20Rik	0.040219619	0.01759577	0.011187408	0.01238246	0.009415558	0.018380055	0.013791277	0.054520977	0	0.032689567
ENSMUSG00000026514	Cnih3	0	0.002554733	0.003543743	0	0	0	0.025730489	0	0	0
ENSMUSG00000050625	Ccdc121	0	0	0.004600557	0	0	0	0	0	0	0
ENSMUSG00000047369	Dnah14	0.004849692	0.007100714	0.007613832	0	0.02212546	0	0	0.019253577	0.169912414	0.032524768
ENSMUSG00000004880	Lbr	0.347111315	0.399137209	0.515028868	0.282140417	0.284488049	0.365562696	0.363057388	0.828691645	0.037011335	0.481978646
ENSMUSG00000056699	Gm5533	0	0	0	0	0	0	0	0	0	0
ENSMUSG00000022995	Enah	0.25870395	0.444940087	0.536767247	0.496611758	0.857915745	0.509163364	0.295356259	0.887199971	1.270762809	0.316425256
ENSMUSG00000026511	Srp9	0.568944504	0.617338468	0.549276019	0.737954413	0.664694749	0.782890105	0.733563837	0.651999416	0.554698357	0.246080215
ENSMUSG00000091013	Vmn1r1	0	0	0	0	0	0	0	0	0	0
ENSMUSG00000038633	Degs1	1.150589557	0.810243749	1.292317838	1.238698129	0.765261988	1.195172539	0.777417282	1.140652825	0.787167974	1.010608642
ENSMUSG00000100147	1700047M11Rik	0.061291897	0.04853714	0.158851603	0.04405892	0.068746403	0.055655869	0.19933977	0.039849791	0.020749579	0.065603134
ENSMUSG00000047539	Fbxo28	0.313236606	0.408926872	0.34405371	0.230566742	0.244387964	0.238826149	0.525805688	0.435902256	0.345361162	0.339200322
ENSMUSG00000026510	Trp53bp2	0.383564143	0.354317014	0.343778887	0.244794473	0.480722657	0.334502015	0.428833634	0.302321651	0.395908649	0.234132563
ENSMUSG00000026509	Capn2	1.118815209	1.235926198	1.367814853	0.980561136	0.809736868	1.36099554	1.234471163	1.116436416	1.365949499	0.999502698
ENSMUSG00000102234	Gm37885	0.05746351	0.039552419	0.034407481	0.065081094	0.070778423	0.032384491	0.01976898	0	0.072834772	0.134886607
ENSMUSG00000038599	Capn8	0	0	0	0	0	0	0	0	0	0
ENSMUSG00000102688	Gm37218	0	0	0	0	0	0	0	0	0	0
ENSMUSG00000043429	Ccdc185	0	0	0	0	0	0	0	0	0	0
ENSMUSG00000038576	Susd4	0.014734314	0.008075008	0	0	0.041402328	0	0.01344142	0	0.052724077	0.029946217
ENSMUSG00000079164	Tlr5	0.004954415	0	0	0	0	0	0	0	0.035296713	0
ENSMUSG00000104367	Gm38079	0	0	0	0	0	0	0	0	0	0
ENSMUSG00000030768	Disp1	0.530240154	0.663210726	1.05272397	0.442116648	0.650374787	0.714976369	0.713826837	0.608823707	0.43577042	0.615700706
ENSMUSG00000046836	Brox	0.321231293	0.378617342	0.325015213	0.228758301	0.292900125	0.409511671	0.447707385	0.417668909	0.334317781	0.278203521
ENSMUSG00000042901	Aida	0.49174427	0.557017921	0.692511828	0.468991309	0.393870344	0.565802324	0.631467947	0.464921109	0.390446678	0.721859787
ENSMUSG00000056050	Mia3	2.118009356	1.934576398	2.423915822	1.817428598	1.866239515	1.985365111	1.81352264	1.321563682	1.704249762	2.385996155
ENSMUSG00000072258	Taf1a	0.223669876	0.269053346	0.230119342	0.172015608	0.183670952	0.27443049	0.173230807	0.242900775	0.195993525	0.131378612
ENSMUSG00000104212	Gm37986	0.012263469	0.00636993	0	0	0	0	0	0.018034395	0	0
ENSMUSG00000053461	Hhipl2	0.001935672	0	0.010516383	0	0.010670081	0	0.00930986	0	0	0
ENSMUSG00000103451	Gm33973	0	0	0	0	0	0	0	0	0	0
ENSMUSG00000103305	Gm34068	0	0	0	0	0	0	0	0	0	0
ENSMUSG00000102743	Gm38108	0	0	0	0	0	0	0	0	0	0
ENSMUSG00000039384	Dusp10	0.050990339	0.111930912	0.105537712	0.079741041	0.104365751	0.063520973	0.064475903	0.07314778	0.068081289	0.163342128
ENSMUSG00000044854	1700056E22Rik	0.014043604	0.002644109	0.00508969	0.009262673	0	0	0	0	0	0
ENSMUSG00000102682	Gm37223	0	0	0	0	0	0	0	0	0	0
ENSMUSG00000102794	Gm37712	0	0	0	0	0	0	0	0	0	0
ENSMUSG00000101574	1700112H15Rik	0	0	0	0	0	0	0	0	0	0
ENSMUSG00000103308	Gm37800	0	0	0.003066027	0	0	0	0	0	0	0
ENSMUSG00000092578	4930488B22Rik	0	0	0	0	0	0	0	0	0	0
ENSMUSG00000039377	Hlx	0.081520332	0.056328649	0.045303927	0.048915706	0.063321584	0.024280782	0.03919157	0.111498178	0	0.032524768
ENSMUSG00000102158	Gm34342	0.012792785	0.015477592	0.017584357	0	0.011848229	0	0.025061871	0.050342922	0	0
ENSMUSG00000026621	Mtarc1	0.004671535	0.013171103	0	0.010623041	0	0	0	0	0	0
ENSMUSG00000073481	Mtarc2	0.87825795	0.661648675	0.798674225	0.89870083	1.046445355	0.718301158	0.813722302	0.957789006	0.510357675	0.606298718
ENSMUSG00000039349	C130074G19Rik	0.011983687	0.008862693	0.03478193	0.062101211	0.018914499	0.015309622	0	0.052547503	0	0
ENSMUSG00000026620	Mark1	0.091791577	0.051122842	0.065261454	0.088393346	0.163746526	0.085462528	0.150383828	0.077593259	0.088299094	0.156437845
ENSMUSG00000102784	Gm38251	0.022819945	0.009939429	0.019029309	0.024322388	0	0.031688992	0.063929336	0.062380951	0.070126153	0.024309016
ENSMUSG00000103942	Gm34732	0	0	0	0	0	0	0	0	0	0
ENSMUSG00000103478	4930433J02Rik	0	0	0	0	0	0	0	0	0	0
ENSMUSG00000104461	Gm37662	0	0	0	0	0	0	0	0	0	0
ENSMUSG00000039318	Rab3gap2	0.624126734	0.74238017	0.62813389	0.412484785	0.737208316	0.634421191	0.533776888	0.514235505	0.437749539	0.843401795
ENSMUSG00000103613	Gm34882	0.010800936	0.010285326	0.004792543	0	0	0.011462316	0	0.031983215	0	0
ENSMUSG00000026618	Iars2	0.838495933	0.84941364	0.821882672	0.72584783	0.657257545	0.951748107	0.807733997	0.691606534	1.012007865	0.817408746
ENSMUSG00000104368	2010103J01Rik	0.005985845	0.004617163	0.001960035	0.0058968	0	0.016170554	0.023382433	0.037221767	0	0
ENSMUSG00000026617	Bpnt1	0.120694633	0.125904563	0.110769594	0.121348541	0.182926681	0.145526917	0.075129896	0.111741767	0.135882386	0.108231353
ENSMUSG00000097261	4930532G15Rik	0.02604937	0.018793247	0.017227585	0.018636752	0.013286141	0.010548256	0.022400029	0.080304515	0	0.045847164
ENSMUSG00000026615	Eprs	1.025954048	1.224832513	1.01916934	1.220911379	0.750832944	1.213346732	1.301078205	1.240200743	1.22672647	1.302660911
ENSMUSG00000051295	9630028B13Rik	0.003414523	0.014901555	0.003389443	0.022163149	0	0	0	0.025870812	0	0
ENSMUSG00000097615	Gm2061	0	0	0	0	0	0	0	0	0	0
ENSMUSG00000026614	Slc30a10	0	0	0	0	0	0	0	0	0	0.045293547
ENSMUSG00000103799	Gm38093	0	0	0	0	0	0	0	0	0	0
ENSMUSG00000039246	Lyplal1	0.059208241	0.108281655	0.071554966	0.036555075	0.01280554	0.051742775	0.054855203	0.048548691	0	0.052598604
ENSMUSG00000103449	Gm37134	0	0	0	0	0	0	0	0	0	0
ENSMUSG00000103690	A730004F24Rik	0	0.002920452	0.003623812	0	0	0	0	0	0	0
ENSMUSG00000039239	Tgfb2	1.038141594	1.189760775	1.198693689	0.778046173	0.419378725	0.949368973	1.512073583	0.987429021	1.191919004	1.423246815
ENSMUSG00000100393	Gm29491	0.002804038	0.02365824	0.005139406	0.00465192	0.015543204	0.013865318	0	0	0	0.021810727
ENSMUSG00000001305	Rrp15	0.139192217	0.156200282	0.176087084	0.158299241	0.1016968	0.11573661	0.109840194	0.123300728	0.067001227	0.266358713
ENSMUSG00000097784	A430105J06Rik	0.042445344	0.045513899	0.028994344	0.019017835	0.032193221	0.014653818	0	0.096155324	0	0
ENSMUSG00000103503	1700023G09Rik	0	0	0	0	0	0	0	0	0	0
ENSMUSG00000104312	Gm37912	0	0	0	0	0	0	0	0	0	0
ENSMUSG00000039224	D1Pas1	0	0	0	0	0	0	0	0	0.036182723	0
ENSMUSG00000026611	Spata17	0.012530167	0.004600188	0.012227806	0.019046313	0	0.015309622	0	0.020633362	0	0
ENSMUSG00000089730	1700007P06Rik	0	0	0	0	0	0	0	0	0	0
ENSMUSG00000039210	Gpatch2	0.860213791	0.95406299	0.833048193	0.624466294	0.975007366	0.892715484	1.017233071	1.127810469	0.960747252	1.00940455
ENSMUSG00000104245	Gm38155	0.051189753	0.054397764	0.070930673	0.015110291	0.030646269	0.076366578	0	0.064693621	0.063209117	0.019297717
ENSMUSG00000103923	Gm37896	0	0.002015979	0	0	0	0	0	0	0	0
ENSMUSG00000026610	Esrrg	0.264823651	0.349890159	0.070616227	0.449296029	1.893837148	0.443746698	0.831179648	0.254889305	0.918991498	0.235271481
ENSMUSG00000103961	Gm36388	0.012382039	0.012059958	0	0.007358807	0.113010753	0	0.021267817	0	0	0
ENSMUSG00000103577	9330162B11Rik	0	0	0	0	0	0	0	0	0	0
ENSMUSG00000104482	Gm38064	0	0	0	0	0	0	0	0	0	0
ENSMUSG00000026609	Ush2a	0.005129357	0.006269644	0	0	0	0	0.01521931	0	0	0
ENSMUSG00000026608	Kctd3	0.257704845	0.298924507	0.253814321	0.100833951	0.454925475	0.257061676	0.204163122	0.176079883	0.328488703	0.140586742
ENSMUSG00000037624	Kcnk2	1.586516613	1.658861949	1.036716514	0.850019341	1.118674497	1.972278196	0.189400393	1.077536268	0.069312967	1.545378704
ENSMUSG00000104507	A430027H14Rik	0.046923069	0.0388343	0.01231229	0.032859767	0.01280554	0.03723034	0.015136115	0	0	0.106265224
ENSMUSG00000026605	Cenpf	0.082038196	0.092586274	0.080853006	0.165229355	0.097447282	0	0.081241051	0.065017047	0.061790664	0.144031008
ENSMUSG00000026604	Ptpn14	0.220259083	0.291545806	0.187376741	0.429566469	0.464958524	0.300409784	0.47381863	0.636206319	1.113817406	0.136518997
ENSMUSG00000097925	Gm26574	0.00538887	0.007503701	0	0	0	0	0.011167956	0	0	0
ENSMUSG00000104435	Gm37422	0.013354719	0.004078762	0.014371118	0	0	0.008748355	0.039398149	0	0	0
ENSMUSG00000026603	Smyd2	0.274245694	0.30629842	0.234085905	0.316864345	0.200394882	0.158248761	0.267998868	0.311779114	0.408218193	0.390004821
ENSMUSG00000010175	Prox1	0.143350059	0.216131209	0.133072657	0.258878211	0.172093608	0.129749059	0.278908024	0.20743944	0.05419122	0.051778595
ENSMUSG00000099404	Gm28172	0.004449014	0	0	0	0	0	0	0	0	0
ENSMUSG00000079045	Prox1os	0.003029275	0	0.001928343	0	0.014253542	0	0.025823378	0	0	0
ENSMUSG00000103644	Gm29678	0	0	0	0	0	0	0	0	0	0
ENSMUSG00000103510	Gm30725	0	0.003796784	0	0	0	0	0	0	0	0
ENSMUSG00000103963	Gm30932	0	0	0	0	0	0	0	0	0	0
ENSMUSG00000089872	Rps6kc1	0.418964113	0.470311895	0.42278884	0.234016096	0.724758761	0.401020872	0.483045171	0.358527129	0.290520554	0.540389346
ENSMUSG00000026634	Angel2	0.750577274	0.741523662	0.616844962	0.665810987	0.719499821	0.71918937	0.735616971	0.686646176	0.424098123	0.599876044
ENSMUSG00000037568	Vash2	0.043703774	0.023830415	0.049585589	0.007051157	0.142540346	0	0.026343422	0	0	0
ENSMUSG00000104487	Gm31373	0	0	0	0	0	0	0	0	0	0
ENSMUSG00000066595	Flvcr1	0.173959805	0.234981351	0.25345841	0.093750072	0.244090563	0.177014725	0.185487814	0.117776055	0.248949044	0.167868507
ENSMUSG00000097845	A230020J21Rik	0.00423433	0.004707885	0	0	0	0	0.010175072	0	0	0
ENSMUSG00000057072	Spata45	0.013092108	0.003255641	0.013172844	0	0	0	0	0	0	0.055835036
ENSMUSG00000026632	Tatdn3	0.129840499	0.160531797	0.130924756	0.086445972	0.154131875	0.086847315	0.17343575	0.281668584	0.175435819	0.102051457
ENSMUSG00000062510	Nsl1	0.006872278	0.00195542	0	0	0	0	0.064265227	0	0	0
ENSMUSG00000103576	Gm38188	0	0	0	0	0	0	0	0	0	0
ENSMUSG00000026630	Batf3	0.006591112	0.010880194	0.002974365	0	0.016053735	0	0	0	0	0.049203881
ENSMUSG00000102777	Gm38161	0	0	0	0	0	0	0	0	0	0
ENSMUSG00000091017	Fam71a	0	0	0	0	0	0	0	0	0	0
ENSMUSG00000026628	Atf3	0.050629711	0.046623154	0.073650781	0.078735235	0	0.026515155	0.068042465	0.046336859	0.068250416	0.045100622
ENSMUSG00000073478	D730003I15Rik	0.169650958	0.151492774	0.10949427	0.114767096	0.152457033	0.175667538	0.089983569	0.110071328	0.046096226	0.047064701
ENSMUSG00000103174	Gm37168	0	0	0	0	0.023324377	0	0	0	0	0
ENSMUSG00000037499	Nenf	2.60385609	1.592405099	2.894545432	2.989659457	1.908988848	3.199139884	2.028050525	2.41401843	2.173297421	1.94728001
ENSMUSG00000026627	Pacc1	0.059184236	0.064541497	0.036482547	0.035887477	0.088180303	0.013070665	0.114721454	0.024598794	0.034707158	0.090569919
ENSMUSG00000026626	Ppp2r5a	0.862530915	0.934897144	0.900279797	0.852421138	0.847810999	0.799516286	0.801387739	1.541479856	1.089630449	0.990220649
ENSMUSG00000103114	Gm32200	0	0	0	0	0	0	0	0	0	0
ENSMUSG00000103517	Gm37432	0	0	0	0	0	0	0	0	0	0
ENSMUSG00000037474	Dtl	0	0.0102283	0	0.017191879	0.015855499	0	0.039627782	0	0	0
ENSMUSG00000037461	Ints7	0.241071409	0.30940921	0.289541753	0.180027655	0.355187382	0.219417979	0.313271511	0.393577588	0.289416031	0.24202075
ENSMUSG00000026623	Lpgat1	0.844021302	0.881661553	0.97980863	0.936557571	0.640411423	0.601771027	0.579016962	0.666191377	0.66320064	0.699994343
ENSMUSG00000102840	Gm38037	0	0	0	0	0	0	0	0	0	0
ENSMUSG00000026622	Nek2	0	0	0.006341054	0	0	0	0	0	0	0
ENSMUSG00000055833	1700034H15Rik	0.007322439	0	0	0	0.011104892	0	0.013157098	0	0	0.024412036
ENSMUSG00000037434	Slc30a1	0.084072783	0.117229374	0.17402525	0.091212182	0.085822474	0.162797923	0.009595004	0.095454719	0.093911027	0.034500604
ENSMUSG00000049353	Rd3	0	0	0	0	0	0	0	0	0	0
ENSMUSG00000097416	Gm26670	0.009975545	0.01161183	0.004190237	0	0.072132392	0.033624853	0	0	0	0.021980148
ENSMUSG00000026637	Traf5	0.52753443	0.629109603	0.545905431	0.258280427	0.656692483	0.521067492	0.643923473	0.469184508	0.306446296	0.574747748
ENSMUSG00000097089	Gm26879	0.086424315	0.151565048	0.102538402	0.092230828	0.060264044	0.071129225	0.094428619	0.073590181	0.110442545	0.100174429
ENSMUSG00000037395	Rcor3	0.619688974	0.75407407	0.570983812	0.411428403	0.758471677	0.584603894	0.590405384	0.66780834	0.617422512	0.539786102
ENSMUSG00000097316	Gm10516	0.162956806	0.20247903	0.131109379	0.113999038	0.295566751	0.194772346	0.203475015	0.149714374	0.141853558	0.16585739
ENSMUSG00000058248	Kcnh1	0.008314381	0.003755655	0.005502775	0	0.012831568	0	0.042922364	0.013063835	0	0
ENSMUSG00000037375	Hhat	0.127941328	0.119589493	0.114647273	0.101276458	0.203667541	0.348763807	0.219004482	0.126903253	0.017574692	0.192542632
ENSMUSG00000100872	1700065J18Rik	0.002142805	0	0.004631479	0	0.011467995	0	0	0	0	0
ENSMUSG00000016262	Sertad4	0.345873979	0.34562832	0.269490422	0.221194719	0.246710446	0.78067416	0.485844535	0.349510869	0.660201744	0.33546278
ENSMUSG00000089812	Gm15867	0.068366037	0.071551138	0.057930462	0.074126975	0.025589691	0.203809562	0.149365047	0.055329865	0.108929729	0.131676824
ENSMUSG00000016200	Syt14	0.00248065	0.003543506	0	0	0	0	0	0	0	0
ENSMUSG00000103640	Gm31406	0	0	0	0	0	0	0	0	0	0
ENSMUSG00000016181	Utp25	0.16700432	0.232475563	0.141393199	0.244204313	0.252829017	0.088237363	0.138753546	0.075753106	0.070282739	0.142327684
ENSMUSG00000026638	Irf6	0.002180026	0.008561433	0.003579194	0.012782755	0.015756567	0.01241243	0.011675314	0.017446161	0	0
ENSMUSG00000079144	A130010J15Rik	0.0330601	0.067405026	0.045451788	0.023898505	0.021614144	0.010124388	0.009381083	0	0.076893166	0.025528699
ENSMUSG00000037318	Traf3ip3	0.008797283	0.011999009	0	0	0	0	0	0	0.019762846	0
ENSMUSG00000090080	Gm15872	0	0	0	0	0	0	0	0	0	0
ENSMUSG00000089683	4930570N18Rik	0.003181989	0	0	0	0	0	0	0	0	0
ENSMUSG00000026639	Lamb3	0.163480426	0.178459483	0.097504672	0.195662774	0.055410051	0.057963697	0.131572009	0.098120882	0.07509474	0.208151003
ENSMUSG00000016194	Hsd11b1	6.444902442	3.6295075	2.375247551	3.52577294	1.109210684	1.186831858	1.212749229	2.605243542	0.456497023	3.784740161
ENSMUSG00000009633	G0s2	6.07277492	3.827696877	2.512405038	3.292017744	1.128349359	2.16333858	2.213667299	2.807490232	1.719152905	2.733472831
ENSMUSG00000103736	Gm37650	0	0	0	0	0	0	0	0	0	0
ENSMUSG00000016179	Camk1g	0	0	0	0.005433988	0	0	0	0	0	0.033338223
ENSMUSG00000097850	Mir205hg	0	0	0	0	0	0	0	0	0	0
ENSMUSG00000103692	4930503O07Rik	0	0	0	0	0	0	0	0	0	0
ENSMUSG00000026640	Plxna2	0.85404944	1.164185504	1.161158049	0.923090787	1.117189984	0.686441332	0.943497083	1.927516152	1.102448457	0.905190822
ENSMUSG00000016494	Cd34	5.882913401	4.631922233	14.81439546	7.404588496	5.125878889	10.10707359	3.737259458	6.118550996	2.627576974	5.858342784
ENSMUSG00000097325	Gm16897	0.138120246	0.119936683	0.225269195	0.06820487	0.162811947	0.155421692	0.207925992	0.098554726	0.016778523	0.110098767
ENSMUSG00000104206	Gm32250	0.361806678	0.454119688	0.232304499	0.245181011	0.709065802	0.493038375	0.536022943	0.431083368	0.596064251	0.233394928
ENSMUSG00000104077	Gm37027	0.006911197	0.008432989	0.003489244	0	0	0	0	0	0.027215513	0.034866045
ENSMUSG00000016493	Cd46	0.59970926	0.721212567	0.4988009	0.385420392	0.51084456	0.239703188	0.570722321	0.347486902	0.414618744	0.517118413
ENSMUSG00000016481	Cr1l	1.39457923	1.458523819	1.620486846	1.204228494	1.429653246	1.482805595	1.033347903	1.575316549	1.398346936	1.741644325
ENSMUSG00000026616	Cr2	0.150789316	0.159349839	0.093531618	0.072001817	0.112658822	0.035620371	0.067266031	0.19417845	0.182384698	0.209223741
ENSMUSG00000050530	Fam171a1	0.638176063	0.682675732	0.706257375	0.470203965	1.044654487	0.69973489	0.762987555	0.985301223	0.823680969	0.82324748
ENSMUSG00000026643	Nmt2	0.632879153	0.758968838	0.898466398	0.415595692	0.717217193	0.734984411	0.499117838	0.950126616	0.965163963	0.577551577
ENSMUSG00000049950	Rpp38	0.097881647	0.109739451	0.111327621	0.038985063	0.033857498	0.10907383	0.030445355	0.114271899	0.12320712	0.114071541
ENSMUSG00000026644	Acbd7	0.002984875	0.011546345	0	0	0	0	0	0	0.051579626	0.028109153
ENSMUSG00000026645	Olah	0	0	0	0	0	0	0	0	0	0
ENSMUSG00000026650	Meig1	0.011155271	0.026433732	0.004672188	0.03506394	0.015832304	0.016163967	0.025823378	0.012322434	0	0
ENSMUSG00000026648	Dclre1c	0.23344452	0.223145262	0.185299423	0.170492129	0.135168551	0.196815428	0.2372099	0.243702168	0.069195075	0.231612903
ENSMUSG00000026646	Suv39h2	0.019617056	0.021424932	0.028201497	0.025165663	0	0.078194434	0	0.046858599	0	0
ENSMUSG00000085043	Gm13184	0.003479353	0.011350821	0.001806277	0.005822511	0.020185872	0	0	0.016443258	0	0.025520621
ENSMUSG00000109865	Hspa14	0.244454094	0.224907924	0.207305337	0.172688397	0.175355608	0.209402761	0.223558782	0.306692145	0.207444577	0.323851516
ENSMUSG00000051396	Gm45902	0.016644988	0.02512632	0.01346004	0.014293256	0.029059293	0.033830785	0.009857247	0.037749412	0	0.050848739
ENSMUSG00000039496	Cdnf	0.030413507	0.034609362	0.022965175	0.101774168	0.036117145	0.041236549	0.035826573	0.017290269	0	0.017198797
ENSMUSG00000026655	Fam107b	0.070334998	0.052441864	0.04749774	0.06241328	0.217321709	0.108717745	0.107578388	0.031320863	0.10656719	0.202464643
ENSMUSG00000085205	Gm13185	0	0.006355114	0	0	0	0	0	0	0	0
ENSMUSG00000085656	Gm13180	0	0	0	0	0	0	0	0	0	0
ENSMUSG00000086445	Gm13191	0	0	0	0	0	0	0	0	0	0
ENSMUSG00000026657	Frmd4a	1.038336618	1.425807307	0.823155879	0.861178363	0.697426883	1.232317792	1.263166983	0.692757839	1.001294846	1.882069054
ENSMUSG00000084859	1700080N15Rik	0	0	0	0	0	0	0	0	0	0
ENSMUSG00000086921	Gm13189	0	0	0	0	0	0	0	0	0	0
ENSMUSG00000086874	Gm13175	0	0.008089987	0	0	0	0	0	0	0	0
ENSMUSG00000086018	Gm13179	0.006682637	0.019772899	0.008581263	0.00465192	0.010190688	0.022251315	0	0.023329601	0	0.023484322
ENSMUSG00000039449	Prpf18	0.415646569	0.436922601	0.345431629	0.367097153	0.452334103	0.276628836	0.369560875	0.35662608	0.490559376	0.324653756
ENSMUSG00000048186	Bend7	0.114309137	0.093484468	0.028067903	0.054968567	0.089211897	0.138722488	0.054614138	0.233879748	0.14742751	0.056752401
ENSMUSG00000026662	Sephs1	0.154638423	0.134247922	0.103115432	0.087470274	0.104601423	0.076499778	0.121777806	0.050356822	0.103227402	0.164954248
ENSMUSG00000026664	Phyh	0.98815533	1.161206527	0.867106122	1.958284031	1.121044437	0.912932824	0.940800841	0.745971876	1.785554353	0.716736505
ENSMUSG00000026668	Ucma	0.005748256	0	0	0.009849762	0	0	0	0.021315235	0.300012958	0
ENSMUSG00000026669	Mcm10	0.001909644	0.005914438	0	0	0	0.01113427	0	0.024598794	0	0
ENSMUSG00000026672	Optn	0.26517636	0.309535655	0.335515987	0.510020688	0.308812369	0.358113648	0.290784973	0.528130069	0.570052909	0.293542943
ENSMUSG00000086430	4930551O13Rik	0.01401485	0.005441077	0.018751719	0.020022649	0	0.020577191	0	0.039442131	0.127215499	0.024568214
ENSMUSG00000026676	Ccdc3	0.005074362	0.014945701	0.010213836	0.010547477	0.099883247	0.152121516	0.040022765	0.051019367	1.345829475	0.024639524
ENSMUSG00000039145	Camk1d	7.4353114	8.030497686	8.853266276	13.29186977	7.144875732	8.130435546	8.74615504	6.638694823	8.618955638	7.283620042
ENSMUSG00000039128	Cdc123	0.593152315	0.595229038	0.558710184	0.29845735	0.52462689	0.533407543	0.406361686	0.532995532	0.328384533	0.516293245
ENSMUSG00000025817	Nudt5	0.676481663	0.8804952	0.71367871	0.511537746	0.599736274	0.57504725	0.601384265	0.711595427	0.555351078	0.6906316
ENSMUSG00000056718	Gm13199	0.0046586	0.01838381	0.00374038	0.007358807	0.03434353	0	0	0	0	0
ENSMUSG00000025816	Sec61a2	0.540562451	0.590983522	0.380154156	0.338445194	0.605559534	0.31450039	0.526697653	0.5263955	0.432939486	0.483212593
ENSMUSG00000085818	Gm13267	0.001242324	0	0	0	0	0	0	0	0	0
ENSMUSG00000025815	Dhtkd1	0.09253638	0.083030399	0.078894984	0.095456048	0.052098074	0.028959027	0.137602977	0.03531574	0.027826087	0.05963417
ENSMUSG00000043241	Upf2	1.179137772	1.31766276	0.950195055	0.757301695	1.3749448	0.993298932	1.197640075	1.356420638	1.239879844	1.833655738
ENSMUSG00000045319	Proser2	0.011219745	0.012260318	0.004902989	0.014959602	0.061083827	0.017660231	0.020379133	0.017188628	0	0
ENSMUSG00000102887	Gm10857	0	0	0	0	0	0	0	0	0	0
ENSMUSG00000039063	Echdc3	0.180156826	0.197799708	0.078263807	0.238899119	0.163258981	0.037974243	0.206413224	0.11055454	0.234585756	0.036455044
ENSMUSG00000087125	A230108P19Rik	0.010691398	0.023338996	0.011306895	0.023817335	0.035008223	0	0.014969813	0.043140093	0.031570639	0.054084375
ENSMUSG00000087485	Gm13383	0	0	0	0	0	0	0	0	0	0
ENSMUSG00000118578	AL845275.1	0.003021643	0	0	0	0	0	0	0	0	0
ENSMUSG00000039046	Usp6nl	0.227578358	0.285701562	0.195578958	0.191649314	0.37046261	0.424417198	0.210934966	0.579969911	0.332458463	0.251595084
ENSMUSG00000085716	Gm13388	0.005289629	0.001619393	0	0	0.014107556	0	0	0	0	0
ENSMUSG00000086109	Gm13391	0	0	0	0	0	0	0	0	0	0
ENSMUSG00000002107	Celf2	31.45318392	33.82577332	27.7629009	19.15577872	39.43854523	17.36187094	25.74382193	21.06839039	7.729887277	25.05014738
ENSMUSG00000087079	Gm13389	0.032423852	0.039731076	0.033125468	0	0.010521886	0.010124388	0.038723301	0.040775762	0	0.017198797
ENSMUSG00000099424	Gm28641	0.001730251	0	0	0	0	0	0	0	0	0
ENSMUSG00000085070	Gm13211	0	0	0	0	0	0	0	0	0	0
ENSMUSG00000085580	1700061F12Rik	0	0	0	0	0	0	0	0	0	0
ENSMUSG00000079604	Gm13219	0	0	0	0	0.022818547	0	0	0	0	0
ENSMUSG00000079603	Gm13218	0	0	0	0	0	0	0	0	0	0
ENSMUSG00000015619	Gata3	0	0	0.012500037	0.013777632	0	0	0.027978132	0.017446161	0	0
ENSMUSG00000086618	Gm13256	0	0	0	0	0	0	0	0	0	0
ENSMUSG00000025783	4930412O13Rik	0.001366242	0.002695371	0.002753389	0	0	0	0	0	0	0
ENSMUSG00000079602	9230102O04Rik	0	0	0	0	0	0	0	0	0	0
ENSMUSG00000075534	Gm13262	0	0.004519512	0.00559034	0	0	0	0	0	0	0
ENSMUSG00000025782	Taf3	0.801195186	0.88224069	0.69079727	0.466259474	0.758740225	0.456053286	0.790156207	0.701288471	0.628420082	0.96775905
ENSMUSG00000025781	Atp5c1	3.528079753	4.31786868	3.473072107	6.83764738	3.785298854	3.246454062	3.431926729	5.009744435	4.183041233	2.274978317
ENSMUSG00000037262	Kin	0.322102617	0.320765859	0.298647459	0.177918201	0.135293972	0.313735245	0.300771089	0.240375758	0.142369398	0.242219302
ENSMUSG00000037254	Itih2	0.033280288	0.01171395	0.013773129	0.031920468	0.052915386	0.179156793	0.192444036	0	0.653489345	0.023463823
ENSMUSG00000025780	Itih5	0.943908994	0.700096259	1.903014735	1.600757989	0.708542679	3.405360912	1.50045387	0.637341573	4.785228071	0.906323064
ENSMUSG00000061186	Sfmbt2	0.00461361	0.003198773	0.009951609	0.015608416	0.017139723	0.01550705	0.018036753	0	0.050681026	0.151368442
ENSMUSG00000085257	Gm13264	0	0	0	0	0	0	0	0	0	0
ENSMUSG00000026778	Prkcq	0.013546426	0.004770291	0.028495363	0.003482112	0	0.012739178	0	0.079036221	0	0
ENSMUSG00000102196	Gm38171	0	0	0	0	0	0	0	0	0	0
ENSMUSG00000102674	8030442B05Rik	0	0.006390152	0	0	0.018887453	0	0.025069191	0	0	0
ENSMUSG00000086006	Gm13293	0	0	0	0	0	0	0.022237541	0	0	0
ENSMUSG00000086491	Gm13291	0	0	0	0	0	0	0	0	0	0
ENSMUSG00000026773	Pfkfb3	0.160193313	0.177987907	0.090651758	0.176022591	0.186193871	0.115808324	0.303204052	0.170721326	0.333067701	0.09442276
ENSMUSG00000102329	Gm10851	0.012927124	0.016480041	0.006846539	0.016758169	0.015052171	0	0	0	0	0
ENSMUSG00000037197	Rbm17	0.302610844	0.279599557	0.355870484	0.379314109	0.35775635	0.301139482	0.281885847	0.562859714	0.233463006	0.514797256
ENSMUSG00000091312	Gm17490	0	0	0	0	0	0	0	0	0	0
ENSMUSG00000026770	Il2ra	0.001571078	0.003569606	0.001977956	0.01746182	0	0	0	0	0	0.044802867
ENSMUSG00000023206	Il15ra	0.482305847	0.596479711	0.346513208	0.336087227	0.256058414	0.290004444	0.350881766	0.487764101	0.516094373	0.532120003
ENSMUSG00000058594	Fbh1	0.344045081	0.410453957	0.362138458	0.367448526	0.2571106	0.289867919	0.369015319	0.488845304	0.367374626	0.314340642
ENSMUSG00000047909	Ankrd16	0.246232231	0.312367615	0.182765993	0.081663791	0.381138288	0.249985894	0.261577044	0.178285496	0.194148657	0.228293154
ENSMUSG00000026768	Itga8	0.711073447	0.713276608	0.118836325	0.49617522	0.665087697	0.289935105	1.776649866	0.249938303	1.942452744	0.533446568
ENSMUSG00000086843	E030013I19Rik	0	0.003255641	0	0	0	0	0	0	0.033891125	0
ENSMUSG00000026767	Mindy3	0.539550286	0.63881092	0.516560389	0.396864381	0.58791234	0.504656909	0.556427429	0.346389359	0.310893858	0.756766333
ENSMUSG00000104045	Gm37565	0	0.002046758	0	0	0	0	0	0	0	0
ENSMUSG00000026730	Pter	0.40680141	0.469800669	0.324090849	0.261381177	0.461670429	0.243084629	0.391250633	0.203925584	0.368872092	0.191145026
ENSMUSG00000049630	C1ql3	0.036663189	0.066219173	0.03421932	0.011930786	0.008133732	0.014238443	0.017098986	0.029938327	0.066148538	0
ENSMUSG00000026727	Rsu1	1.533637433	1.866658646	1.597153724	1.559656613	1.878287656	1.384779554	1.76347374	1.783576394	1.314083484	1.702743373
ENSMUSG00000026726	Cubn	0.051518873	0.041663387	0.033963631	0.027921711	0.062619198	0.042645808	0.079817072	0.034238602	0.574940984	0
ENSMUSG00000026723	Trdmt1	0.135138281	0.137127199	0.087390397	0.100324742	0.074672297	0.117000689	0.277525581	0.11624592	0.207150115	0.051822485
ENSMUSG00000026728	Vim	4.064954424	3.341368957	6.927973651	6.220521575	4.04486718	9.951476976	6.258665792	4.526159919	11.16968067	4.849608123
ENSMUSG00000003418	St8sia6	0.018798595	0.045617855	0.012134267	0.030391994	0	0.028361638	0.022295301	0.291399772	0.028787334	0.01864197
ENSMUSG00000104354	Gm37126	0	0	0	0	0	0	0	0	0	0
ENSMUSG00000063275	Hacd1	0.393817442	0.397152871	0.331516619	0.507332712	0.514621103	0.378207122	0.189782904	0.332106394	0.237459788	0.601523037
ENSMUSG00000026718	Stam	0.592014123	0.691534896	0.645143	0.414964879	0.50253215	0.528351898	0.529512103	0.549077324	0.563730548	0.552166755
ENSMUSG00000061531	Tmem236	0.002012175	0.004537172	0	0	0	0	0	0	0	0
ENSMUSG00000026712	Mrc1	0.132396084	0.193774403	0.077505029	0.621705307	0.165358006	0.075898702	0.085665741	0.127222001	0.204569434	0.021810727
ENSMUSG00000036949	Slc39a12	0	0	0	0	0	0	0	0	0	0
ENSMUSG00000057914	Cacnb2	0.483180226	0.306325376	0.100262407	0.623725231	0.892713523	0.288335266	1.435746958	0.320013094	0.634320774	1.252556948
ENSMUSG00000104106	Gm10848	0.057770879	0.045024736	0.014550131	0.016993394	0.051861713	0	0.138734888	0.04136402	0.094564243	0.294480063
ENSMUSG00000087086	Gm13269	0.037995799	0.024313866	0.004831122	0.014945711	0.125559218	0.01113427	0.090829806	0	0.020920502	0.085860806
ENSMUSG00000026707	Nsun6	0.408636608	0.407383402	0.450906493	0.315411036	0.417663908	0.352019782	0.365903391	0.318905533	0.174024178	0.462952158
ENSMUSG00000017418	Arl5b	0.523071746	0.628050541	0.637078874	0.353765716	0.47685138	0.326825941	0.404893189	0.427514809	0.424581227	0.9129007
ENSMUSG00000075520	Malrd1	0.006187473	0.004175671	0.002570413	0.027079644	0	0	0	0	0.042964554	0
ENSMUSG00000026748	Plxdc2	10.4958414	11.34970853	9.396219609	6.442112074	7.682425641	6.951119671	4.92284629	5.736804141	10.10059866	10.33521955
ENSMUSG00000085193	Gm13322	0	0	0	0	0	0	0	0	0	0
ENSMUSG00000053702	Nebl	0.489643864	0.664214222	0.476369335	1.61888804	0.642313108	0.497140451	0.587852742	1.126625527	1.311820916	0.360048336
ENSMUSG00000085100	Gm13324	0	0	0	0	0	0	0	0	0	0
ENSMUSG00000062651	H2al2a	0	0	0	0	0	0	0	0	0	0
ENSMUSG00000054057	A930004D18Rik	0.055292391	0.04848862	0.06322539	0.056089488	0.067998374	0.03848026	0.096410319	0.055755228	0.03355819	0.023484322
ENSMUSG00000085319	Gm13330	0.002030344	0.001890108	0	0	0	0	0	0	0	0
ENSMUSG00000054074	Skida1	0.160642944	0.157765035	0.18075283	0.082227953	0.157573933	0.250311047	0.422233458	0.176161592	0.060686516	0.05223532
ENSMUSG00000026743	Mllt10	2.29783604	2.708586306	2.147538971	1.69446992	2.429748975	2.003454722	2.479461988	2.492123023	2.251888172	2.430412994
ENSMUSG00000026740	Dnajc1	4.370662169	4.486628394	3.739588778	2.992668031	4.706965437	3.39492757	3.628816246	3.295408763	3.11046658	4.260534599
ENSMUSG00000051154	Commd3	0.609194871	0.576360233	0.54109072	0.736239269	0.436314753	0.666131613	0.598123575	0.672730619	0.496789576	0.528688778
ENSMUSG00000026739	Bmi1	0.146309592	0.097996722	0.148694963	0.147176013	0.116157393	0.238777184	0.176708583	0.203287257	0.042564512	0.165387079
ENSMUSG00000037708	Spag6	0.035967263	0.043284898	0.032709426	0.022715051	0.038277767	0	0.066900273	0.069436781	0	0
ENSMUSG00000092353	Gm20539	0.035472723	0.036881752	0.021260501	0.031715164	0.059283064	0.023277546	0.103849784	0.017290269	0	0
ENSMUSG00000097638	Carlr	0	0	0	0	0	0	0	0	0	0
ENSMUSG00000026737	Pip4k2a	1.021031235	1.159785742	0.857273883	0.767397369	0.999258248	0.659794818	0.922916334	1.025649647	0.424769321	1.044687389
ENSMUSG00000037683	Armc3	0	0.007403821	0.002664659	0	0	0	0.013250526	0	0	0.048972153
ENSMUSG00000087674	4930447M23Rik	0.002436413	0.00361982	0	0	0	0	0	0	0	0
ENSMUSG00000023094	Msrb2	0.256274634	0.287701235	0.186764189	0.325982345	0.228073608	0.201436502	0.220487414	0.211115254	0.246898639	0.42552107
ENSMUSG00000109733	Gm33940	0.010680547	0	0.007345319	0	0	0	0	0	0	0
ENSMUSG00000087103	Gm13344	0	0	0	0	0	0	0	0	0	0
ENSMUSG00000085388	Ptf1aos	0	0	0	0	0	0	0	0	0	0
ENSMUSG00000026735	Ptf1a	0	0	0	0	0	0	0	0	0	0
ENSMUSG00000026734	4921504E06Rik	0	0	0	0	0	0	0	0	0	0
ENSMUSG00000086621	Gm13348	0	0	0	0	0	0	0	0	0	0
ENSMUSG00000043415	Otud1	0.070477195	0.067477599	0.054485107	0.160367793	0.108828295	0.092952939	0.076828598	0.082055241	0.177585262	0.043477767
ENSMUSG00000087246	Gm13346	0	0	0	0	0	0	0	0	0	0
ENSMUSG00000036617	Etl4	0.166936179	0.242068628	0.201874074	0.483694702	0.233530418	0.519726737	0.121834858	4.104351868	0.729190008	0.277131519
ENSMUSG00000091457	Gm17171	0	0	0	0	0	0	0	0.032690422	0	0
ENSMUSG00000085477	Gm13335	0	0	0	0	0	0	0	0.02127732	0	0
ENSMUSG00000086418	Gm13362	0.004276051	0.00304194	0	0	0	0	0	0.060916896	0	0
ENSMUSG00000036591	Arhgap21	3.111159231	3.638154715	2.793110151	2.35747852	3.30982093	2.504100378	3.286082703	2.669764096	3.104278672	2.530552502
ENSMUSG00000075514	Gm13375	0.025453161	0.028203491	0.021463913	0.031587528	0.00982079	0.027768922	0	0	0.043680044	0.053232029
ENSMUSG00000087219	Gm13376	0	0	0	0	0	0	0	0	0	0
ENSMUSG00000026679	Enkur	0.01153656	0.007858136	0.010085523	0.008373456	0.034746316	0.008828151	0.013809027	0	0.125165536	0
ENSMUSG00000048550	Thnsl1	0.042388278	0.061531428	0.052174351	0.060096615	0.061800727	0.023825262	0.177563449	0	0.028787334	0.034994646
ENSMUSG00000085680	Gm13327	0	0	0	0	0	0	0	0	0	0
ENSMUSG00000045967	Gpr158	0	0.005846968	0.003278353	0	0	0	0	0	0	0
ENSMUSG00000025716	Myo3a	0.015075191	0.00130399	0	0	0.017593492	0.017343767	0	0	0	0.061291286
ENSMUSG00000026787	Gad2	0	0	0	0	0	0	0	0	0	0
ENSMUSG00000085353	1700092C17Rik	0.003930556	0.005029002	0.005985219	0	0	0	0	0	0	0
ENSMUSG00000026786	Apbb1ip	1.674295083	1.737529552	1.714159772	0.989531701	1.863702282	1.569124107	1.879637066	0.972267543	0.660345504	1.891925422
ENSMUSG00000026784	Pdss1	0.385283987	0.384960079	0.314220025	0.233993467	0.512227001	0.330558735	0.385458885	0.289818239	0.27154422	0.37713639
ENSMUSG00000058835	Abi1	2.074163082	2.684248295	3.950819434	1.775850832	3.589612971	2.051202339	3.828889801	2.527485672	2.470350735	3.535902051
ENSMUSG00000026781	Acbd5	0.594044737	0.744744088	0.53920697	0.57735566	0.536334894	0.627226779	0.658422059	0.662677325	0.93352616	0.409864291
ENSMUSG00000026779	Mastl	0.034121766	0.05857688	0.05894791	0.043313401	0.083454295	0.031539951	0.024829884	0.048162133	0.023467292	0.091591754
ENSMUSG00000026775	Yme1l1	1.322702636	1.363056086	1.270649345	1.042491485	1.606211987	1.162272	1.166201073	1.166116752	0.965480553	1.461676454
ENSMUSG00000026774	Potegl	0	0.00457961	0	0	0.017005068	0	0	0	0	0
ENSMUSG00000069132	Nxph2	0	0	0	0	0	0	0	0	0	0
ENSMUSG00000026771	Spopl	0.596218148	0.739834376	0.673395275	0.40250207	0.866277117	0.563056026	0.708475253	0.90217085	0.642250511	0.454740955
ENSMUSG00000026986	Hnmt	0.150974756	0.132342918	0.098127748	0.079731789	0.167736751	0.09121197	0.083242649	0.11395672	0.22489617	0.056218307
ENSMUSG00000061809	Tbpl2	0	0	0	0	0	0	0	0	0	0
ENSMUSG00000026985	Il1f8	0	0	0	0	0	0	0	0	0	0
ENSMUSG00000044103	Il1f9	0	0	0	0.006252141	0	0	0	0	0	0
ENSMUSG00000026984	Il1f6	0	0	0	0	0	0	0	0	0	0
ENSMUSG00000026983	Il1f5	0	0	0	0	0	0	0	0	0	0
ENSMUSG00000046845	Il1f10	0	0	0	0	0	0	0	0	0	0
ENSMUSG00000085999	Gm13411	0	0	0	0	0	0	0	0	0	0
ENSMUSG00000026981	Il1rn	0	0.004486558	0	0	0	0	0	0	0	0
ENSMUSG00000026979	Psd4	0.007491624	0	0	0.027018613	0	0	0	0	0.070470139	0
ENSMUSG00000026976	Pax8	0	0	0	0	0	0	0	0	0	0
ENSMUSG00000085330	Gm13417	0	0	0	0	0	0	0	0	0	0
ENSMUSG00000004113	Cacna1b	0	0.005184642	0.006490703	0	0	0	0	0.03606879	0	0
ENSMUSG00000036893	Ehmt1	1.422135844	1.68324719	1.34994401	1.101745418	1.636591758	1.343118502	1.639705421	1.568127362	1.200814454	1.350861888
ENSMUSG00000026972	Arrdc1	0.064764491	0.040455873	0.060643662	0.015623835	0.100630385	0.038597166	0.049633691	0.114093596	0.053789603	0
ENSMUSG00000026974	Zmynd19	0.065606525	0.100562681	0.084515841	0.056757707	0	0.062413671	0.130551381	0.129947263	0	0.075242418
ENSMUSG00000026975	Dph7	0.137631029	0.184700596	0.118784829	0.081555907	0.184456326	0.190927014	0.230946587	0.033855282	0.32377294	0.033673687
ENSMUSG00000036850	Mrpl41	0.3313908	0.377706039	0.304214396	0.41262018	0.388602769	0.366279251	0.355929747	0.288907538	0.339678409	0.392180791
ENSMUSG00000036833	Pnpla7	0.189282899	0.264004912	0.144926589	0.175482563	0.19022651	0.084617599	0.145455246	0.171888614	0.223243605	0.23449689
ENSMUSG00000006476	Nsmf	0.26395697	0.251785685	0.223235812	0.13903907	0.325204833	0.404626042	0.329736843	0.197923652	0.23961027	0.228601351
ENSMUSG00000036813	Entpd8	0	0.005563864	0	0	0	0	0	0	0	0
ENSMUSG00000036805	Noxa1	0	0	0	0	0	0	0	0	0	0
ENSMUSG00000087028	Gm13387	0	0	0	0	0	0	0	0.048162133	0	0.029648956
ENSMUSG00000078202	Nrarp	0.007315372	0.016721433	0.006866405	0.011573563	0.02552479	0	0.01994352	0.037841688	0	0.059551638
ENSMUSG00000103217	Gm38287	0.003760119	0.007107311	0.003556615	0.005321051	0	0	0.033635153	0.039584827	0	0.032232279
ENSMUSG00000059555	Tor4a	0.036479485	0.020435612	0.018113689	0.042276825	0.011848229	0.020740419	0.025253577	0.020045543	0	0
ENSMUSG00000013465	Nelfb	0.273462573	0.283141147	0.249776849	0.225341697	0.396505887	0.249858117	0.205863892	0.253460766	0.278386011	0.372192589
ENSMUSG00000036770	Stpg3	0	0	0	0	0	0	0	0	0	0
ENSMUSG00000026969	Fam166a	0.002200022	0	0	0	0	0	0	0	0	0
ENSMUSG00000036752	Tubb4b	0.679886378	0.535559758	0.654090997	1.107191415	0.455303466	0.728736048	0.773371057	0.850037224	0.429353596	0.621506357
ENSMUSG00000006469	Slc34a3	0	0	0	0	0	0	0	0	0	0
ENSMUSG00000089953	Rnf224	0	0	0	0	0	0	0	0	0	0
ENSMUSG00000036731	Cysrt1	0	0	0	0	0	0	0	0	0	0
ENSMUSG00000044628	Rnf208	0	0	0.004903704	0	0	0	0	0	0	0
ENSMUSG00000115018	Ndor1	0.002709073	0.001591923	0	0	0	0	0	0	0	0.022351763
ENSMUSG00000006471	Ndor1	0.015060692	0.028858383	0.031422528	0.005725095	0.035460977	0	0.056857732	0	0	0
ENSMUSG00000115074	Ndor1	0	0	0	0	0	0	0	0	0	0
ENSMUSG00000078201	Tmem203	0.189870604	0.119868894	0.13949787	0.132073308	0.215982937	0.091342619	0.07060349	0.14461745	0.087617586	0.152905765
ENSMUSG00000048707	Tprn	0.018472514	0.002104909	0.010364454	0.01012824	0.011104892	0.018346348	0.01336191	0	0	0.028658551
ENSMUSG00000026966	Ssna1	0.275854452	0.272280823	0.293843498	0.24752411	0.170685293	0.26307363	0.20394479	0.223990507	0.135266843	0.044286195
ENSMUSG00000026965	Anapc2	0.325717441	0.291824446	0.281088282	0.293657951	0.344483498	0.373732413	0.348802328	0.285273146	0.199539045	0.218579162
ENSMUSG00000026963	Tmem210	0	0	0	0	0	0	0	0	0	0
ENSMUSG00000026961	Lrrc26	0	0	0	0	0	0	0	0	0	0
ENSMUSG00000026959	Grin1	0	0.002489777	0.002083854	0	0	0	0	0	0	0
ENSMUSG00000085830	Grin1os	0	0	0	0	0	0	0	0	0	0
ENSMUSG00000036646	Man1b1	0.386201339	0.363067437	0.388589227	0.408866531	0.370257669	0.394083686	0.430207808	0.348219184	0.403571845	0.154917241
ENSMUSG00000026958	Dpp7	0.24503348	0.126174836	0.270898914	0.25252589	0.2363955	0.33867482	0.3052079	0.183090693	0.086943468	0.274624857
ENSMUSG00000026956	Uap1l1	0.077541877	0.070857403	0.104582782	0.011068663	0.036251896	0.056714033	0.021763922	0.092359847	0.170485215	0.112761949
ENSMUSG00000026955	Sapcd2	0	0	0	0	0	0	0	0	0	0
ENSMUSG00000015085	Entpd2	3.48203427	2.190405098	4.300834165	3.12742354	2.448412817	3.999003879	2.075510797	2.188797257	0.744797312	3.23148343
ENSMUSG00000015094	Npdc1	0.839488574	0.611460159	0.978955641	0.680393592	0.860968832	0.953526155	0.713329573	0.617496129	0.580179228	0.679978491
ENSMUSG00000036587	Fut7	0	0	0	0	0	0.020444379	0	0	0	0
ENSMUSG00000026944	Abca2	0.134438273	0.126039726	0.195812789	0.180453313	0.216246028	0.183184948	0.141122771	0.134766808	0.28715962	0.135755651
ENSMUSG00000047617	Paxx	0.13421616	0.128770827	0.138456533	0.149012442	0.025196703	0.165706776	0.260866409	0.096208853	0.136281687	0.297689593
ENSMUSG00000015093	Clic3	0.002797229	0.007783449	0.003015829	0	0.018281268	0	0	0	0	0
ENSMUSG00000015090	Ptgds	0.583988759	0.734178844	0.508910752	2.73743748	0.812550961	0.887129954	0.755963392	1.405504328	1.318564885	0.369137067
ENSMUSG00000026943	Lcn12	0	0	0	0	0	0	0	0	0	0
ENSMUSG00000015083	C8g	0.001662043	0.005532538	0.009397685	0.016679999	0	0	0.034327563	0.022099252	0	0
ENSMUSG00000015095	Fbxw5	0.18331813	0.214441672	0.194902923	0.230899785	0.210376162	0.153434885	0.26418203	0.036921524	0.128321457	0.230256931
ENSMUSG00000026942	Traf2	0.138418786	0.138133551	0.091849378	0.122124011	0.093049719	0.069287748	0.063374105	0.069370722	0.171581905	0.203750916
ENSMUSG00000015092	Edf1	0.623044159	0.772145864	0.656609224	1.175536064	0.638984656	0.688220783	0.586181949	0.735811031	0.538751237	0.50038135
ENSMUSG00000026941	Mamdc4	0.019692506	0.019748161	0.016509939	0.010127259	0	0	0.026267953	0.015895017	0	0.029648956
ENSMUSG00000036504	Phpt1	0.075647055	0.093961754	0.091596672	0.061831563	0.085245713	0.063402595	0.10132554	0.044932166	0.076586763	0.067101607
ENSMUSG00000029419	Ajm1	0.005393011	0	0	0	0	0	0	0	0	0
ENSMUSG00000015087	Rabl6	0.830697141	0.971984046	0.715437412	0.763448676	0.946495664	0.769716717	1.181990451	0.739262354	0.508483849	0.536689691
ENSMUSG00000052403	Fcnaos	0.001401364	0.007900945	0.006821692	0	0.012254542	0	0	0	0	0
ENSMUSG00000026940	Ccdc183	0.005882193	0.002115188	0.008599081	0	0	0	0	0	0	0
ENSMUSG00000026939	Tmem141	0.074801867	0.095461403	0.051013092	0.129955232	0.066376181	0.023589697	0.018595518	0.019253577	0	0.150036214
ENSMUSG00000026938	Fcna	0.018504419	0.013681264	0.021296744	0	0	0.02601418	0.015125447	0	0.037011335	0
ENSMUSG00000036449	Lcn8	0	0	0	0	0	0	0.030364904	0	0	0
ENSMUSG00000026937	Lcn5	0	0	0	0	0	0	0	0	0	0
ENSMUSG00000045684	Lcn6	0	0	0	0	0	0	0	0	0	0
ENSMUSG00000047356	Lcn10	0	0	0	0	0	0	0	0	0	0
ENSMUSG00000062061	Obp2a	0	0	0	0	0	0	0	0	0	0
ENSMUSG00000087612	A230005M16Rik	0	0.008471791	0.01009056	0	0.049351479	0.008385997	0	0.034238602	0	0
ENSMUSG00000049086	Bmyc	0.280694038	0.298265592	0.279054251	0.267085894	0.322589233	0.307464371	0.491249503	0.331690455	0.527673417	0.474953199
ENSMUSG00000079539	Obp2b	0	0	0.00302318	0	0	0	0	0	0	0
ENSMUSG00000026936	Lcn3	0	0	0	0	0	0	0	0	0	0
ENSMUSG00000069080	Lcn11	0	0.004952182	0	0	0	0	0.016353002	0	0	0
ENSMUSG00000085484	Gm13539	0	0	0	0	0	0	0	0	0	0
ENSMUSG00000036401	Glt6d1	0	0	0	0	0	0	0	0	0	0
ENSMUSG00000023210	Lcn9	0	0	0	0	0	0	0	0	0	0
ENSMUSG00000059625	Sohlh1	0	0	0	0	0	0	0	0	0	0
ENSMUSG00000058740	Kcnt1	0	0.005630631	0	0	0	0	0.021443145	0	0.027826087	0
ENSMUSG00000026933	Camsap1	0.361597021	0.457467507	0.454556409	0.442287459	0.546573465	0.398461707	0.570695196	0.395305457	0.572560179	0.290675923
ENSMUSG00000036352	Ubac1	0.336328853	0.296549228	0.272243617	0.267455411	0.294900797	0.303659233	0.448718807	0.253838339	0.415921079	0.243269715
ENSMUSG00000026932	Nacc2	0.14447349	0.199817302	0.148327289	0.139252438	0.131322531	0.232466956	0.136850245	0.116901495	0.139021311	0.25652356
ENSMUSG00000087515	Gm13554	0	0	0	0	0	0	0	0	0	0
ENSMUSG00000087679	Tmem250-ps	0.070642664	0.08210973	0.098011658	0.169173774	0.104396499	0.047773733	0.11728352	0.031047416	0.069173989	0.087328786
ENSMUSG00000087595	1810012K08Rik	0.01146316	0.016656819	0.013295992	0	0.014599648	0.009873735	0	0	0	0
ENSMUSG00000085545	Gm13553	0	0	0	0	0	0	0	0	0	0
ENSMUSG00000026934	Lhx3	0	0	0	0	0	0	0	0	0	0
ENSMUSG00000098977	Gm27196	0	0	0	0	0	0	0	0	0	0
ENSMUSG00000036327	Qsox2	0.208435779	0.204951942	0.240844336	0.202051306	0.155259742	0.267449788	0.309724046	0.172044492	0.276248585	0.180806017
ENSMUSG00000048038	Ccdc187	0.006163296	0	0.003558656	0	0	0.01013991	0	0	0	0
ENSMUSG00000026930	Gpsm1	0.41261765	0.451786448	0.398248274	0.437418265	0.32802911	0.548727229	0.571174842	0.339308954	0.843314993	0.241183308
ENSMUSG00000075467	Dnlz	0.284786838	0.370476116	0.294669492	0.464128235	0.206959323	0.314489045	0.330960834	0.151224108	0.309892866	0.100117703
ENSMUSG00000026928	Card9	0.002117165	0	0.008223443	0.003998561	0	0.010582011	0	0	0	0
ENSMUSG00000036281	Snapc4	0.14869643	0.168135572	0.096614025	0.154800885	0.156755159	0.153675689	0.057636358	0.054835006	0.290322914	0.055934103
ENSMUSG00000085767	Gm13563	0.023028853	0.049160582	0.020604607	0.024713325	0.013936272	0.038555055	0.009595004	0	0.033458804	0.057334026
ENSMUSG00000026927	Entr1	0.574095897	0.684230016	0.527390278	0.313669403	0.497495684	0.452876245	0.493349037	0.726408229	0.361836696	0.306580159
ENSMUSG00000026926	Pmpca	0.290242705	0.309032868	0.258138679	0.496785207	0.391216987	0.262389807	0.155917474	0.54613497	0.131984368	0.275582698
ENSMUSG00000026925	Inpp5e	0.073352768	0.062564343	0.091915908	0.081458928	0.049246378	0.202088241	0.047963501	0.105345334	0.129240892	0.14287157
ENSMUSG00000026924	Sec16a	0.630797704	0.722355713	0.524490189	0.444484678	0.569944372	0.627686741	0.713399419	0.834283149	0.458343932	0.511798873
ENSMUSG00000026923	Notch1	0.28014923	0.255989062	0.232337344	0.332323048	0.162056233	0.450886666	0.570954107	0.678310067	0.365884646	0.342737962
ENSMUSG00000026921	Egfl7	0.143407623	0.167125313	0.097875534	0.430246025	0.094137786	0.035545322	0.08751604	2.173172564	0.165231824	0.30400293
[truncated: 28,481 more rows]
