# Supplementary material for: Single-cell RNA-seq of heart reveals intercellular communication drivers of myocardial fibrosis in diabetic cardiomyopathy
Source: eLife. 2023 Apr 3;12:e80479. doi: 10.7554/eLife.80479 (PMC10110238; doi:10.7554/eLife.80479)
Supplement: Supplementary file 16. [file elife-80479-supp16.xls]

Supplementary file 16: Distinct signatures of each fibroblast subpopulations in mice hearts
Target_Cluster	Gene ID	Gene Name	Target_Cluster_mean	Other_Cluster_mean	Log2FC	Pvalue	Qvalue
0	ENSMUSG00000002985	Apoe	41.66638581	17.72061378	1.23345539	1.06E-184	3.24E-180
0	ENSMUSG00000019278	Dpep1	11.84117764	5.663156758	1.064134198	1.29E-157	3.93E-153
0	ENSMUSG00000019929	Dcn	114.9795975	75.07487474	0.614975817	7.07E-156	2.16E-151
0	ENSMUSG00000016194	Hsd11b1	6.444902442	2.80029182	1.202581341	1.22E-129	3.71E-125
0	ENSMUSG00000021390	Ogn	13.4783566	7.473455076	0.850797322	3.03E-123	9.23E-119
0	ENSMUSG00000030218	Mgp	52.22123732	34.08384882	0.615548384	5.05E-108	1.54E-103
0	ENSMUSG00000018339	Gpx3	7.440014842	3.974678872	0.904467195	1.15E-101	3.52E-97
0	ENSMUSG00000020354	Sgcd	19.59485944	11.25096248	0.8004268	5.16E-85	1.57E-80
0	ENSMUSG00000057315	Arhgap24	16.18574848	10.42063965	0.635280244	1.29E-80	3.93E-76
0	ENSMUSG00000029309	Sparcl1	12.99328518	8.332375039	0.640966561	1.95E-80	5.94E-76
0	ENSMUSG00000009633	G0s2	6.07277492	2.999858062	1.017461657	4.40E-79	1.34E-74
0	ENSMUSG00000032625	Thsd7a	13.24162768	7.914226891	0.74256014	4.54E-77	1.38E-72
0	ENSMUSG00000024164	C3	19.63426788	12.41353265	0.661460067	1.86E-74	5.68E-70
0	ENSMUSG00000023224	Serping1	17.47337222	12.26424534	0.510699601	1.47E-73	4.47E-69
0	ENSMUSG00000025723	Nmb	1.849949831	0.521278192	1.827360736	3.80E-73	1.16E-68
0	ENSMUSG00000006344	Ggt5	1.980863451	0.869007694	1.188688577	1.83E-66	5.57E-62
0	ENSMUSG00000045573	Penk	2.911570305	1.282347384	1.183010319	1.20E-63	3.66E-59
0	ENSMUSG00000036256	Igfbp7	23.0037657	17.4890704	0.395416441	2.46E-63	7.49E-59
0	ENSMUSG00000027447	Cst3	21.65320223	14.99808117	0.529802461	6.88E-63	2.10E-58
0	ENSMUSG00000024481	Lvrn	4.072573254	2.171917026	0.90697166	1.06E-61	3.23E-57
0	ENSMUSG00000031825	Crispld2	8.369692817	5.41407413	0.628460033	2.08E-61	6.34E-57
0	ENSMUSG00000056427	Slit3	9.768077347	6.230968564	0.648618186	2.77E-57	8.45E-53
0	ENSMUSG00000021508	Cxcl14	4.978614367	1.917305859	1.37666377	3.18E-57	9.70E-53
0	ENSMUSG00000028369	Svep1	4.907919434	2.773774211	0.823261211	5.23E-56	1.59E-51
0	ENSMUSG00000030790	Adm	1.721663855	0.637802727	1.432621322	5.81E-56	1.77E-51
0	ENSMUSG00000043719	Col6a6	4.373892664	2.605015094	0.747626085	1.43E-54	4.37E-50
0	ENSMUSG00000038521	C1s1	4.000470136	2.350542103	0.767176033	2.03E-52	6.20E-48
0	ENSMUSG00000003617	Cp	7.878236919	5.249689755	0.585640638	8.41E-52	2.56E-47
0	ENSMUSG00000038156	Spon1	5.32671442	3.275235899	0.701647115	1.14E-51	3.47E-47
0	ENSMUSG00000023885	Thbs2	4.259781195	2.45997659	0.792134741	9.64E-50	2.94E-45
0	ENSMUSG00000022108	Itm2b	15.96360123	12.17264293	0.391143706	2.23E-49	6.78E-45
0	ENSMUSG00000069670	Nkain2	7.497139846	2.513615313	1.576576439	3.21E-49	9.79E-45
0	ENSMUSG00000060703	Cd302	4.504664923	2.763341365	0.705006002	7.30E-49	2.22E-44
0	ENSMUSG00000031963	Bmper	4.619054554	2.911522135	0.665823999	2.59E-47	7.90E-43
0	ENSMUSG00000027962	Vcam1	2.887916134	1.660116212	0.79874461	1.11E-46	3.39E-42
0	ENSMUSG00000022425	Enpp2	3.790863609	2.216317498	0.774361982	2.15E-45	6.54E-41
0	ENSMUSG00000027656	Ccn5	2.163015167	0.914537137	1.241930121	6.34E-45	1.93E-40
0	ENSMUSG00000054203	Ifi205	4.288370412	2.527024776	0.762989716	1.56E-44	4.74E-40
0	ENSMUSG00000006369	Fbln1	7.587781293	5.600841748	0.43803443	4.95E-44	1.51E-39
0	ENSMUSG00000002900	Lamb1	8.452638741	6.135287928	0.462270741	1.88E-43	5.73E-39
0	ENSMUSG00000053279	Aldh1a1	6.584169645	4.385096162	0.586393028	2.64E-43	8.05E-39
0	ENSMUSG00000029096	Htra3	10.54045643	7.662834053	0.459987373	2.41E-42	7.35E-38
0	ENSMUSG00000034810	Scn7a	8.281985329	5.978422273	0.470211845	4.77E-42	1.45E-37
0	ENSMUSG00000023886	Smoc2	10.55464645	7.652745761	0.463828877	1.02E-41	3.10E-37
0	ENSMUSG00000025089	Gfra1	2.817932981	1.744554279	0.691778815	1.22E-41	3.72E-37
0	ENSMUSG00000021876	Rnase4	5.491009605	3.745155154	0.552045947	1.10E-40	3.37E-36
0	ENSMUSG00000006205	Htra1	2.649007883	1.509896655	0.811002329	5.74E-39	1.75E-34
0	ENSMUSG00000022309	Angpt1	4.906320681	3.193233852	0.619623322	8.30E-38	2.53E-33
0	ENSMUSG00000024678	Ms4a4d	4.518997475	2.945266444	0.617604597	1.54E-37	4.69E-33
0	ENSMUSG00000017493	Igfbp4	6.212377553	4.481859623	0.471048049	1.31E-36	3.99E-32
0	ENSMUSG00000031342	Gpm6b	6.079317927	4.386889062	0.470711245	1.95E-36	5.93E-32
0	ENSMUSG00000030737	Slco2b1	2.782715208	1.745153782	0.673139094	7.07E-36	2.16E-31
0	ENSMUSG00000031502	Col4a1	12.54588966	9.722914104	0.367754098	7.22E-36	2.20E-31
0	ENSMUSG00000055172	C1ra	2.945156211	1.827954043	0.688114357	2.70E-35	8.23E-31
0	ENSMUSG00000026170	Cyp27a1	3.749595818	2.479277339	0.596815426	1.15E-33	3.50E-29
0	ENSMUSG00000027408	Cpxm1	2.213928208	1.289363566	0.779949318	1.16E-31	3.55E-27
0	ENSMUSG00000015568	Lpl	11.63387808	8.986775609	0.372456606	2.25E-31	6.87E-27
0	ENSMUSG00000008540	Mgst1	3.944216404	2.593295621	0.604952034	2.43E-31	7.42E-27
0	ENSMUSG00000025351	Cd63	8.149363038	6.117356853	0.413778864	1.28E-30	3.89E-26
0	ENSMUSG00000027955	Gask1b	2.540427729	1.624241894	0.645304918	1.80E-30	5.48E-26
0	ENSMUSG00000027074	Slc43a3	9.161492228	6.801207123	0.429791776	2.74E-30	8.36E-26
0	ENSMUSG00000022894	Adamts5	12.2155555	9.289939295	0.394978397	3.17E-30	9.65E-26
0	ENSMUSG00000048126	Col6a3	5.854088195	4.300503743	0.44493882	5.13E-30	1.56E-25
0	ENSMUSG00000027820	Mme	1.395617984	0.791517674	0.818210623	2.04E-28	6.21E-24
0	ENSMUSG00000073411	H2-D1	6.59449882	4.909510037	0.425683967	2.33E-28	7.10E-24
0	ENSMUSG00000064373	Selenop	3.87910328	2.772064469	0.484762377	2.48E-28	7.55E-24
0	ENSMUSG00000021559	Dapk1	3.393445387	2.254884538	0.589697233	8.42E-27	2.57E-22
0	ENSMUSG00000024085	Man2a1	5.932383803	4.418004241	0.425217134	1.70E-26	5.19E-22
0	ENSMUSG00000031451	Gas6	2.737892327	1.902541185	0.525138026	2.02E-26	6.14E-22
0	ENSMUSG00000061232	H2-K1	5.051282057	3.789406693	0.414677619	3.75E-26	1.14E-21
0	ENSMUSG00000043631	Ecm2	4.361903264	3.088632724	0.497989448	9.99E-25	3.04E-20
0	ENSMUSG00000025492	Ifitm3	6.09871334	4.726671518	0.367680299	2.84E-24	8.66E-20
0	ENSMUSG00000046532	Ar	5.019730191	3.820221555	0.393953512	4.71E-24	1.44E-19
0	ENSMUSG00000001918	Slc1a5	3.286746174	2.330076213	0.496282902	5.93E-24	1.81E-19
0	ENSMUSG00000027692	Tnik	2.871588433	2.058138862	0.480508668	6.11E-23	1.86E-18
0	ENSMUSG00000020053	Igf1	3.996874424	2.749167908	0.539877223	1.20E-22	3.66E-18
0	ENSMUSG00000007097	Atp1a2	3.674636615	2.702539444	0.443285914	1.59E-22	4.85E-18
0	ENSMUSG00000030157	Clec2d	4.006901437	2.871359255	0.480753175	2.18E-22	6.64E-18
0	ENSMUSG00000020009	Ifngr1	4.476926789	3.347244084	0.419534969	2.21E-21	6.73E-17
0	ENSMUSG00000035948	Acss3	1.615137176	1.032449835	0.645585015	3.03E-21	9.24E-17
0	ENSMUSG00000016256	Ctsz	2.818087081	2.018187731	0.481655813	8.46E-21	2.58E-16
0	ENSMUSG00000046318	Ccbe1	3.128447769	2.326592383	0.427228544	8.85E-21	2.70E-16
0	ENSMUSG00000060591	Ifitm2	4.783467485	3.600958564	0.409675793	1.16E-20	3.52E-16
0	ENSMUSG00000016534	Lamp2	4.43111294	3.421717421	0.372948478	2.02E-20	6.17E-16
0	ENSMUSG00000032554	Trf	1.802691021	1.071327918	0.750752006	4.30E-20	1.31E-15
0	ENSMUSG00000047216	Cdh19	2.733065937	1.853762622	0.560063751	4.98E-20	1.52E-15
0	ENSMUSG00000019539	Rcn3	3.36110377	2.411424004	0.47904974	6.45E-19	1.97E-14
0	ENSMUSG00000013663	Pten	3.752143181	2.831595405	0.406099742	7.35E-19	2.24E-14
0	ENSMUSG00000073490	Ifi207	2.654403794	1.885373101	0.493537804	1.60E-18	4.88E-14
0	ENSMUSG00000033308	Dpyd	2.598917936	1.726344038	0.590191076	6.29E-18	1.92E-13
0	ENSMUSG00000017897	Eya2	1.709551111	1.115484726	0.615946797	9.07E-18	2.76E-13
0	ENSMUSG00000033965	Slc16a2	2.671203041	2.007044688	0.412416902	1.14E-17	3.49E-13
0	ENSMUSG00000028399	Ptprd	3.716120435	2.822487445	0.396830095	4.12E-17	1.26E-12
0	ENSMUSG00000021186	Fbln5	2.835403327	2.016686282	0.491567294	1.29E-16	3.94E-12
0	ENSMUSG00000009281	Rarres2	4.523032142	3.471836777	0.381591125	1.30E-16	3.95E-12
0	ENSMUSG00000031558	Slit2	3.905633335	2.692300909	0.53671685	3.39E-16	1.03E-11
0	ENSMUSG00000002732	Fkbp7	1.541085302	1.02916538	0.582471887	1.24E-15	3.78E-11
0	ENSMUSG00000032024	Clmp	3.014833566	2.307864403	0.385519898	2.02E-15	6.15E-11
0	ENSMUSG00000096145	Vkorc1	1.453682808	0.975463459	0.575552774	3.47E-15	1.06E-10
0	ENSMUSG00000027848	Olfml3	2.14536197	1.554892672	0.464406082	5.24E-15	1.60E-10
0	ENSMUSG00000022324	Matn2	2.764179309	2.103182994	0.394276823	7.88E-15	2.40E-10
0	ENSMUSG00000020681	Ace	2.435162274	1.807377605	0.430119962	8.80E-15	2.68E-10
0	ENSMUSG00000019775	Rgs17	1.934475044	1.333643476	0.536569077	9.68E-15	2.95E-10
0	ENSMUSG00000040170	Fmo2	2.629528993	1.918342605	0.454944003	4.21E-14	1.28E-09
0	ENSMUSG00000026072	Il1r1	2.425005613	1.798045229	0.431558775	6.26E-14	1.91E-09
0	ENSMUSG00000075702	Selenom	2.569321591	1.99244835	0.366845151	9.51E-14	2.90E-09
0	ENSMUSG00000042116	Vwa1	1.520196009	1.06865142	0.50846601	1.05E-13	3.20E-09
0	ENSMUSG00000025724	Sec11a	2.062525147	1.499062843	0.460350844	1.31E-13	4.01E-09
0	ENSMUSG00000006519	Cyba	2.463827646	1.8608723	0.404922282	1.58E-13	4.80E-09
0	ENSMUSG00000037211	Spry1	1.477834703	1.051371944	0.49121177	1.84E-13	5.61E-09
0	ENSMUSG00000073889	Il11ra1	1.749625305	1.247028747	0.488551268	2.53E-13	7.72E-09
0	ENSMUSG00000031253	Srpx2	1.704777427	1.243617001	0.455041151	4.44E-13	1.35E-08
0	ENSMUSG00000052942	Glis3	1.678652344	1.24662636	0.429274349	1.27E-12	3.86E-08
0	ENSMUSG00000025381	Cnpy2	1.531589518	1.086598064	0.49521131	1.83E-12	5.57E-08
0	ENSMUSG00000091243	Vgll3	1.562606974	1.088768388	0.521257875	1.91E-11	5.83E-07
0	ENSMUSG00000060904	Arl1	1.54293881	1.149896524	0.424176805	2.91E-11	8.86E-07
0	ENSMUSG00000020709	Adap2	1.58567612	1.225924017	0.371228562	3.05E-11	9.29E-07
0	ENSMUSG00000054263	Lifr	1.480738139	1.096049557	0.4340035	3.46E-11	1.05E-06
0	ENSMUSG00000021242	Npc2	2.09707268	1.565294138	0.421943081	4.59E-11	1.40E-06
0	ENSMUSG00000022146	Osmr	1.929904349	1.464929834	0.39769778	1.46E-10	4.44E-06
0	ENSMUSG00000034708	Grn	1.683402069	1.254396153	0.424386756	1.33E-09	4.04E-05
0	ENSMUSG00000026223	Itm2c	1.630130517	1.224813422	0.412425481	2.21E-09	6.74E-05
0	ENSMUSG00000051323	Pcdh19	2.081280328	1.595560796	0.383407714	5.08E-09	0.00015486
0	ENSMUSG00000029061	Mmp23	1.405449975	1.063110079	0.402741116	9.40E-09	0.000286528
0	ENSMUSG00000022971	Ifnar2	1.307695404	1.012017176	0.369792764	3.20E-08	0.000976564
0	ENSMUSG00000040462	Os9	1.611554813	1.211991228	0.411074002	6.13E-08	0.001869776
0	ENSMUSG00000030605	Mfge8	1.39703124	1.084244697	0.365673895	9.83E-08	0.002997436
0	ENSMUSG00000056429	Tgoln1	1.670771899	1.298975438	0.363140632	7.74E-07	0.023580315
0	ENSMUSG00000013622	Atraid	1.334939599	1.038894333	0.361725542	2.54E-05	0.775293729
1	ENSMUSG00000032238	Rora	30.06726594	20.71987792	0.537178184	3.13E-57	9.54E-53
1	ENSMUSG00000037605	Adgrl3	3.379702549	1.382438172	1.289681321	1.04E-52	3.18E-48
1	ENSMUSG00000053477	Tcf4	13.70705212	9.158047383	0.581806399	6.87E-52	2.09E-47
1	ENSMUSG00000000392	Fap	3.062717702	1.233738703	1.311775522	1.51E-48	4.59E-44
1	ENSMUSG00000034751	Mast4	16.16023004	10.87520808	0.571404729	2.51E-48	7.66E-44
1	ENSMUSG00000058571	Gpc6	26.84004536	18.09262315	0.568985519	1.18E-45	3.60E-41
1	ENSMUSG00000078247	Airn	14.80124363	9.879620637	0.583190849	3.66E-43	1.12E-38
1	ENSMUSG00000008658	Rbfox1	2.097681686	0.818269981	1.358146941	3.31E-41	1.01E-36
1	ENSMUSG00000054843	Atrnl1	7.880885326	5.019709539	0.650753822	5.49E-38	1.67E-33
1	ENSMUSG00000031523	Dlc1	17.52277569	13.30774592	0.396965096	5.90E-34	1.80E-29
1	ENSMUSG00000030102	Itpr1	5.000793121	3.050373609	0.713170969	1.01E-32	3.08E-28
1	ENSMUSG00000037926	Ssh2	8.252541472	5.525684997	0.578685163	3.03E-26	9.22E-22
1	ENSMUSG00000020709	Adap2	2.027901396	1.062628505	0.932350186	5.41E-26	1.65E-21
1	ENSMUSG00000057315	Arhgap24	14.45433291	11.17902488	0.370707678	2.81E-24	8.56E-20
1	ENSMUSG00000038608	Dock10	2.071587777	0.99296662	1.060919827	5.71E-24	1.74E-19
1	ENSMUSG00000055737	Ghr	11.81714614	8.592665227	0.459704072	9.42E-24	2.87E-19
1	ENSMUSG00000035305	Ror1	4.771724866	3.058120332	0.641865685	2.11E-23	6.43E-19
1	ENSMUSG00000068196	Col8a1	8.366780703	5.305884348	0.657079392	7.43E-23	2.26E-18
1	ENSMUSG00000074813	Morrbid	2.774885456	1.50645761	0.881268143	2.96E-21	9.03E-17
1	ENSMUSG00000044471	Lncpint	5.885460498	3.957758122	0.572471856	4.50E-21	1.37E-16
1	ENSMUSG00000032826	Ank2	6.817747924	4.815885117	0.501494282	4.74E-21	1.45E-16
1	ENSMUSG00000059327	Eda	10.47346225	7.402048466	0.50074195	1.98E-20	6.03E-16
1	ENSMUSG00000022306	Zfpm2	11.51845447	8.861399774	0.378340637	4.28E-20	1.31E-15
1	ENSMUSG00000055421	Pcdh9	22.85261486	17.57840884	0.378554765	4.43E-20	1.35E-15
1	ENSMUSG00000004098	Col5a3	4.617647296	3.064201853	0.591646644	2.17E-19	6.61E-15
1	ENSMUSG00000029673	Auts2	8.076977798	6.06795001	0.412606373	1.03E-18	3.15E-14
1	ENSMUSG00000021217	Tshz3	3.138127966	1.991533148	0.656024691	1.51E-17	4.59E-13
1	ENSMUSG00000041624	Gucy1a2	3.840533946	2.31787478	0.728504273	1.57E-17	4.77E-13
1	ENSMUSG00000046768	Rhoj	9.169844834	6.83680093	0.423575903	2.18E-17	6.65E-13
1	ENSMUSG00000039286	Fndc3b	7.236466152	5.535535071	0.386562569	4.96E-17	1.51E-12
1	ENSMUSG00000047747	Rnf150	1.972809971	1.138214874	0.793479059	1.07E-16	3.27E-12
1	ENSMUSG00000026970	Rbms1	8.665855475	6.697959282	0.371620571	9.59E-16	2.92E-11
1	ENSMUSG00000019647	Sema6a	1.633400282	0.922068046	0.824933256	1.21E-15	3.68E-11
1	ENSMUSG00000037813	D630003M21Rik	1.647742791	0.963386405	0.774304587	6.08E-15	1.85E-10
1	ENSMUSG00000061731	Ext1	6.915664299	5.096615276	0.440328385	6.19E-15	1.89E-10
1	ENSMUSG00000029823	Luc7l2	6.753186835	5.173451495	0.384441369	6.22E-15	1.90E-10
1	ENSMUSG00000048960	Prex2	5.855821754	4.199769835	0.479561376	9.26E-15	2.82E-10
1	ENSMUSG00000052920	Prkg1	9.837621303	7.574016282	0.377250997	3.32E-14	1.01E-09
1	ENSMUSG00000036356	Csgalnact1	2.189688293	1.297219178	0.755303256	4.84E-14	1.48E-09
1	ENSMUSG00000031355	Arhgap6	7.134092824	5.216805224	0.451563418	8.06E-14	2.46E-09
1	ENSMUSG00000078190	Dnm3os	1.596641806	0.941782789	0.761574428	1.48E-13	4.50E-09
1	ENSMUSG00000030020	Prickle2	2.121393869	1.3210832	0.683291175	1.64E-13	4.99E-09
1	ENSMUSG00000038371	Sbf2	3.841771134	2.668581664	0.525698414	2.85E-13	8.68E-09
1	ENSMUSG00000031561	Tenm3	8.31096624	6.297809331	0.400166136	5.20E-13	1.59E-08
1	ENSMUSG00000056608	Chd9	6.130828824	4.675219203	0.391048116	1.01E-12	3.08E-08
1	ENSMUSG00000040852	Plekhh2	2.554575156	1.703522825	0.584562103	2.02E-12	6.16E-08
1	ENSMUSG00000042348	Arl15	6.115397937	4.746427757	0.365604255	6.89E-12	2.10E-07
1	ENSMUSG00000038248	Sobp	3.208628626	2.180757926	0.557127185	9.93E-12	3.03E-07
1	ENSMUSG00000043556	Fbxl7	5.750634299	3.837880241	0.583411401	3.04E-11	9.28E-07
1	ENSMUSG00000019775	Rgs17	2.047358674	1.30040699	0.654800653	5.91E-11	1.80E-06
1	ENSMUSG00000018001	Cyth3	3.942298079	2.798874638	0.494189993	9.15E-11	2.79E-06
1	ENSMUSG00000036097	Slf2	1.887033594	1.205565423	0.646410162	2.33E-10	7.10E-06
1	ENSMUSG00000019699	Akt3	4.618493635	3.566921702	0.372742832	4.05E-10	1.23E-05
1	ENSMUSG00000031342	Gpm6b	5.881849611	4.490557327	0.389375387	4.82E-10	1.47E-05
1	ENSMUSG00000031024	Denn2b	2.797996638	1.930268419	0.535592749	6.94E-10	2.12E-05
1	ENSMUSG00000040265	Dnm3	2.265977007	1.47092001	0.623414429	7.88E-10	2.40E-05
1	ENSMUSG00000047907	Tshz2	4.124612756	3.104514771	0.409890881	8.82E-10	2.69E-05
1	ENSMUSG00000027692	Tnik	2.94114555	2.045014331	0.524267228	1.09E-09	3.32E-05
1	ENSMUSG00000028926	Cdk14	3.953391589	2.770123639	0.513140494	1.28E-09	3.90E-05
1	ENSMUSG00000033721	Vav3	3.370120637	2.433078827	0.470017174	1.35E-09	4.11E-05
1	ENSMUSG00000015133	Lrrk1	2.542733342	1.857623774	0.452921832	2.45E-09	7.46E-05
1	ENSMUSG00000022197	Pdzd2	3.415121858	2.491060338	0.455177091	3.58E-09	0.000109187
1	ENSMUSG00000020589	Fam49a	2.177418293	1.441619844	0.594927807	3.83E-09	0.000116796
1	ENSMUSG00000041757	Plekha6	2.841698007	2.006646802	0.50196654	4.46E-09	0.00013581
1	ENSMUSG00000003992	Ssbp2	4.047829013	3.025102921	0.420164123	4.62E-09	0.000140793
1	ENSMUSG00000004383	Large1	3.533890992	2.629744811	0.42633473	4.63E-09	0.000140997
1	ENSMUSG00000028760	Eif4g3	3.644390967	2.673723027	0.446827716	5.45E-09	0.000166144
1	ENSMUSG00000039197	Adk	2.742291406	1.951091153	0.491100705	7.97E-09	0.000243031
1	ENSMUSG00000058013	Septin11	2.716932251	1.873765343	0.5360383	1.39E-08	0.00042339
1	ENSMUSG00000027695	Pld1	2.377233467	1.660671741	0.517516667	2.39E-08	0.000729512
1	ENSMUSG00000026077	Npas2	2.704442318	1.820559932	0.570948893	5.90E-08	0.001796891
1	ENSMUSG00000032621	Srek1	2.391597314	1.743828308	0.455716492	7.99E-08	0.002435671
1	ENSMUSG00000025089	Gfra1	2.681406231	1.814623604	0.563319473	8.75E-08	0.002666951
1	ENSMUSG00000038546	Ranbp9	2.096455518	1.42425513	0.557744617	9.80E-08	0.002985843
1	ENSMUSG00000087201	Gm15261	4.536051933	3.252434894	0.47991698	1.31E-07	0.003994169
1	ENSMUSG00000022377	Asap1	3.967930806	2.942823792	0.431185707	1.74E-07	0.005315879
1	ENSMUSG00000039234	Sec24d	2.863393987	2.119245747	0.434175299	2.70E-07	0.008241593
1	ENSMUSG00000059588	Calcrl	2.596671403	1.897445038	0.452605362	4.11E-07	0.012513693
1	ENSMUSG00000031229	Atrx	4.251977415	3.239571125	0.392331101	4.94E-07	0.015068848
1	ENSMUSG00000050812	Ecpas	2.931475381	2.177271595	0.429105559	6.48E-07	0.019746755
1	ENSMUSG00000033671	Cep350	2.078680071	1.526530177	0.445411621	1.05E-06	0.031911621
1	ENSMUSG00000050103	Agmo	3.898402878	3.026713612	0.365131019	1.65E-06	0.050328232
1	ENSMUSG00000053279	Aldh1a1	6.022563158	4.636549131	0.377326175	2.02E-06	0.061435756
1	ENSMUSG00000047712	Ust	3.061093368	2.343923098	0.385121813	2.05E-06	0.0625212
1	ENSMUSG00000050730	Arhgap42	2.35093817	1.671165257	0.492382192	3.04E-06	0.092635835
1	ENSMUSG00000028034	Fubp1	2.429603836	1.820092325	0.416709458	3.34E-06	0.101693101
1	ENSMUSG00000031963	Bmper	4.114488565	3.132985323	0.393175102	4.21E-06	0.128200818
1	ENSMUSG00000042302	Ehbp1	3.578635372	2.779181492	0.364749503	4.64E-06	0.141280162
1	ENSMUSG00000041440	Gk5	1.4930966	1.052837606	0.504024582	4.95E-06	0.150730633
1	ENSMUSG00000029313	Aff1	2.356099527	1.725057604	0.449755946	7.18E-06	0.218921059
1	ENSMUSG00000024481	Lvrn	3.304394591	2.497485094	0.403909907	8.37E-06	0.255063326
1	ENSMUSG00000021391	Cenpp	1.921419369	1.353034587	0.505973717	9.38E-06	0.285960393
1	ENSMUSG00000039997	Ifi203	2.934519874	2.256078439	0.379307251	1.05E-05	0.321534844
1	ENSMUSG00000031642	Sh3rf1	1.517793074	1.079263038	0.491928595	1.38E-05	0.419520738
1	ENSMUSG00000038784	Cnot4	2.781361069	2.142448279	0.376530667	1.39E-05	0.423868843
1	ENSMUSG00000049939	Lrrc4	1.938873206	1.337014342	0.53620352	1.41E-05	0.42970438
1	ENSMUSG00000036391	Sec24a	1.726679803	1.185221823	0.542843478	1.73E-05	0.526338265
1	ENSMUSG00000057335	Cep170	2.31871767	1.717984264	0.432610345	2.20E-05	0.669145114
1	ENSMUSG00000020457	Drg1	1.808955026	1.25935971	0.522466123	2.31E-05	0.703050107
1	ENSMUSG00000037211	Spry1	1.476009548	1.059147613	0.478798382	2.45E-05	0.74593509
1	ENSMUSG00000034354	Mtmr3	2.072674369	1.574743345	0.396376763	2.51E-05	0.764426483
1	ENSMUSG00000021838	Samd4	2.586147744	1.849496172	0.483672382	2.60E-05	0.793411158
1	ENSMUSG00000033308	Dpyd	2.610564214	1.736366538	0.588290121	3.60E-05	1
1	ENSMUSG00000026425	Srgap2	3.110924784	2.413456376	0.366242764	4.18E-05	1
1	ENSMUSG00000032377	Plscr4	2.538010724	1.943675656	0.38491067	4.22E-05	1
1	ENSMUSG00000035354	Uvrag	2.063935797	1.522217776	0.439223321	4.77E-05	1
1	ENSMUSG00000027598	Itch	2.43205113	1.794102294	0.438911409	6.67E-05	1
1	ENSMUSG00000025224	Gbf1	2.198118477	1.6087509	0.450328193	7.17E-05	1
1	ENSMUSG00000097462	9530026P05Rik	2.661198032	1.978496126	0.427671632	7.37E-05	1
1	ENSMUSG00000045038	Prkce	1.695644347	1.233263638	0.459352362	7.43E-05	1
1	ENSMUSG00000025812	Pard3	3.167137121	2.432963562	0.380464617	7.59E-05	1
1	ENSMUSG00000034120	Srsf2	2.288670545	1.731526285	0.402465513	8.53E-05	1
1	ENSMUSG00000030352	Tspan9	1.457552645	1.066483459	0.450686404	9.20E-05	1
1	ENSMUSG00000073147	5031425E22Rik	2.06910484	1.545388723	0.421036972	0.000141163	1
1	ENSMUSG00000021188	Trip11	2.367072131	1.842944798	0.361090812	0.000156128	1
1	ENSMUSG00000030126	Tmcc1	2.985476055	2.31006743	0.370026034	0.000189295	1
1	ENSMUSG00000046201	Scaf8	1.991725475	1.497983223	0.410997345	0.000207743	1
1	ENSMUSG00000072501	Phf20l1	2.433160561	1.890667915	0.36393554	0.000208238	1
1	ENSMUSG00000053907	Mat2a	2.290482931	1.703911318	0.42680156	0.000228378	1
1	ENSMUSG00000045078	Rnf216	1.583275069	1.179617406	0.424592908	0.000312734	1
1	ENSMUSG00000086782	E130102H24Rik	2.079998587	1.569984151	0.405832553	0.000349318	1
1	ENSMUSG00000024299	Adamts10	2.611958915	2.019302905	0.371274866	0.000394802	1
1	ENSMUSG00000026222	Sp100	1.781907765	1.332848766	0.418909571	0.000409816	1
1	ENSMUSG00000022146	Osmr	1.904499374	1.482369979	0.361506244	0.000413767	1
1	ENSMUSG00000024222	Fkbp5	3.071331134	2.378485205	0.368821013	0.000421872	1
1	ENSMUSG00000036792	Mbd5	2.786229362	2.126534497	0.389809766	0.000443567	1
1	ENSMUSG00000052539	Magi3	2.475135528	1.877339974	0.398817587	0.000447251	1
1	ENSMUSG00000059439	Bcas3	2.489331515	1.869389777	0.413190963	0.00045795	1
1	ENSMUSG00000030655	Smg1	2.413657986	1.863986337	0.372829976	0.000477992	1
1	ENSMUSG00000011256	Adam19	2.370175433	1.751802514	0.436153702	0.000531504	1
1	ENSMUSG00000026554	Dcaf8	1.473331743	1.108379642	0.410630194	0.000538327	1
1	ENSMUSG00000001424	Snd1	1.765174439	1.339672709	0.397930177	0.000814322	1
1	ENSMUSG00000030213	Atf7ip	2.297423179	1.775841018	0.371514191	0.000824524	1
1	ENSMUSG00000032656	Marchf3	1.901490389	1.385466905	0.456758398	0.000904244	1
1	ENSMUSG00000057133	Chd6	2.191850578	1.69812112	0.368210087	0.000956296	1
1	ENSMUSG00000015522	Arnt	1.9252479	1.472452213	0.38682341	0.000979169	1
1	ENSMUSG00000037416	Dmxl1	2.223226885	1.678195115	0.405744725	0.001014591	1
1	ENSMUSG00000035597	Prpf39	1.664470968	1.282856008	0.375704461	0.001122562	1
1	ENSMUSG00000047216	Cdh19	2.550976896	1.938050659	0.396443551	0.001187998	1
1	ENSMUSG00000029913	Prdm5	1.581292555	1.172830316	0.431110006	0.001243692	1
1	ENSMUSG00000022914	Brwd1	1.638835627	1.267886605	0.37024544	0.001322665	1
1	ENSMUSG00000026504	Sdccag8	1.796125979	1.356983653	0.404485201	0.001498673	1
1	ENSMUSG00000020305	Asb3	1.773180895	1.313386692	0.433047981	0.001618208	1
1	ENSMUSG00000038372	Gmds	2.337708775	1.788924458	0.386002747	0.00170322	1
1	ENSMUSG00000020160	Meis1	2.6157699	2.029958338	0.365785519	0.001891456	1
1	ENSMUSG00000035437	Rabgap1	1.902130819	1.430213959	0.411385481	0.001908089	1
1	ENSMUSG00000112437	Gm35188	1.764396225	1.315662997	0.423384584	0.002043532	1
1	ENSMUSG00000075415	Fnbp1	1.611125771	1.226012633	0.394095277	0.002111732	1
1	ENSMUSG00000006586	Runx1t1	2.21632927	1.670024937	0.408302586	0.00215508	1
1	ENSMUSG00000026034	Clk1	1.702614824	1.324676301	0.362112231	0.002633638	1
1	ENSMUSG00000027806	Tsc22d2	1.687020804	1.247145397	0.435848095	0.003986823	1
1	ENSMUSG00000002413	Braf	1.808751424	1.342544034	0.430024745	0.004220414	1
1	ENSMUSG00000039529	Atp8b1	1.750534061	1.337261608	0.388513406	0.006036433	1
1	ENSMUSG00000070565	Rasal2	1.820669756	1.389062629	0.390357614	0.007869982	1
2	ENSMUSG00000056481	Cd248	7.092334956	0.72465369	3.290897069	0	0
2	ENSMUSG00000024011	Pi16	20.43617994	3.811629316	2.422645816	2.18E-282	6.66E-278
2	ENSMUSG00000044337	Ackr3	9.066071411	2.041116349	2.151119103	1.12E-274	3.42E-270
2	ENSMUSG00000020363	Gfpt2	10.57041179	1.942216776	2.444255442	4.46E-242	1.36E-237
2	ENSMUSG00000044017	Adgrd1	6.452760795	1.282135892	2.331367366	5.04E-240	1.54E-235
2	ENSMUSG00000030116	Mfap5	15.66043075	4.640245576	1.754850831	6.79E-235	2.07E-230
2	ENSMUSG00000016494	Cd34	14.81439546	5.625277768	1.397003513	1.92E-220	5.84E-216
2	ENSMUSG00000075602	Ly6a	10.69497123	3.151827265	1.762672227	6.63E-204	2.02E-199
2	ENSMUSG00000002602	Axl	8.868177561	3.017200376	1.555427146	1.60E-191	4.88E-187
2	ENSMUSG00000070469	Adamtsl3	7.5085287	1.82068529	2.044048668	3.86E-190	1.18E-185
2	ENSMUSG00000025784	Clec3b	25.95512035	11.77211566	1.140645555	2.14E-178	6.53E-174
2	ENSMUSG00000024053	Emilin2	2.57248101	0.522443712	2.299812912	2.03E-169	6.18E-165
2	ENSMUSG00000064080	Fbln2	19.45464743	8.470047094	1.199672939	5.17E-165	1.58E-160
2	ENSMUSG00000035000	Dpp4	1.86259815	0.269382777	2.789586933	8.52E-162	2.60E-157
2	ENSMUSG00000017466	Timp2	15.31021915	6.288624128	1.283678621	4.34E-161	1.32E-156
2	ENSMUSG00000030513	Pcsk6	16.91898811	7.413014374	1.190511073	1.45E-160	4.43E-156
2	ENSMUSG00000027204	Fbn1	18.85815477	6.701370092	1.492660529	5.97E-157	1.82E-152
2	ENSMUSG00000026399	Cd55	5.925990561	1.655842254	1.839491089	1.36E-155	4.16E-151
2	ENSMUSG00000028780	Sema3c	3.72048198	0.610997795	2.606250453	3.67E-148	1.12E-143
2	ENSMUSG00000022816	Fstl1	14.92676632	6.652068646	1.166026697	2.67E-146	8.13E-142
2	ENSMUSG00000002847	Pla1a	5.092213215	1.571184944	1.696439817	5.12E-137	1.56E-132
2	ENSMUSG00000003032	Klf4	2.962495297	0.789143801	1.908452741	1.25E-130	3.81E-126
2	ENSMUSG00000079018	Ly6c1	3.542240655	0.86127103	2.040123019	7.64E-130	2.33E-125
2	ENSMUSG00000026478	Lamc1	22.35397227	12.80750883	0.803541332	1.32E-128	4.04E-124
2	ENSMUSG00000015354	Pcolce2	5.972500353	2.385315001	1.324155235	3.06E-125	9.33E-121
2	ENSMUSG00000026879	Gsn	240.1787194	136.6709665	0.813401531	6.70E-123	2.04E-118
2	ENSMUSG00000039683	Sdk1	3.558827693	1.134404932	1.649466374	3.16E-121	9.63E-117
2	ENSMUSG00000028108	Ecm1	6.24163829	2.465810635	1.339862744	1.60E-119	4.87E-115
2	ENSMUSG00000026193	Fn1	2.885051514	0.634183229	2.185625448	6.95E-119	2.12E-114
2	ENSMUSG00000023046	Igfbp6	7.114522461	2.535385888	1.48856158	1.20E-118	3.65E-114
2	ENSMUSG00000071656	Lrrn4cl	1.183793436	0.209724068	2.49685302	3.88E-116	1.18E-111
2	ENSMUSG00000033327	Tnxb	18.60053847	10.07589773	0.884436002	3.48E-115	1.06E-110
2	ENSMUSG00000026697	Myoc	4.652105477	1.178181043	1.981322563	2.05E-114	6.24E-110
2	ENSMUSG00000030110	Ret	1.876504314	0.440775601	2.089931335	3.11E-110	9.47E-106
2	ENSMUSG00000037206	Islr	7.390088278	3.408837991	1.116311563	2.69E-108	8.19E-104
2	ENSMUSG00000069763	Tmem100	1.748841884	0.309753503	2.497207354	1.17E-107	3.56E-103
2	ENSMUSG00000026670	Uap1	2.751750009	0.804190845	1.774739592	1.14E-103	3.47E-99
2	ENSMUSG00000021614	Vcan	6.048538164	2.604634322	1.215505669	3.49E-100	1.06E-95
2	ENSMUSG00000020467	Efemp1	4.942626693	1.94956777	1.342123641	1.13E-99	3.45E-95
2	ENSMUSG00000022032	Scara5	7.936972865	3.917802276	1.018544284	1.38E-96	4.21E-92
2	ENSMUSG00000021130	Galnt16	1.473851942	0.400533839	1.879595565	2.54E-93	7.73E-89
2	ENSMUSG00000037736	Limch1	2.46515945	0.646801753	1.93028547	8.21E-89	2.50E-84
2	ENSMUSG00000025314	Ptprj	3.244690678	1.27167181	1.351354559	5.28E-88	1.61E-83
2	ENSMUSG00000022894	Adamts5	15.8333541	8.987935159	0.816905283	3.10E-82	9.44E-78
2	ENSMUSG00000024164	C3	24.49471605	12.48706761	0.972035846	2.12E-81	6.47E-77
2	ENSMUSG00000018217	Pmp22	6.43390458	3.382367668	0.927661049	4.70E-81	1.43E-76
2	ENSMUSG00000001025	S100a6	11.93543142	6.735247329	0.825447886	1.07E-80	3.27E-76
2	ENSMUSG00000062825	Actg1	4.63607231	2.021143113	1.197731589	8.82E-80	2.69E-75
2	ENSMUSG00000040212	Emp3	7.325634239	3.871355165	0.920115002	1.09E-78	3.31E-74
2	ENSMUSG00000030342	Cd9	5.520592194	2.842693898	0.957564275	6.02E-76	1.84E-71
2	ENSMUSG00000022371	Col14a1	3.462711955	1.556585616	1.153517451	3.80E-75	1.16E-70
2	ENSMUSG00000025790	Slco3a1	3.462190549	1.551287342	1.15821919	3.87E-75	1.18E-70
2	ENSMUSG00000053007	Creb5	4.892171454	2.22460213	1.136927633	2.95E-74	9.00E-70
2	ENSMUSG00000005397	Nid1	14.15136746	8.916221875	0.666437046	5.15E-73	1.57E-68
2	ENSMUSG00000071984	Fndc1	5.520145248	2.469900765	1.16025315	4.81E-72	1.47E-67
2	ENSMUSG00000034205	Loxl2	2.050245785	0.826351922	1.310968648	1.41E-70	4.31E-66
2	ENSMUSG00000026574	Dpt	8.978704583	5.167177517	0.797130865	2.51E-69	7.66E-65
2	ENSMUSG00000072812	Ahnak2	2.201725258	0.882500225	1.318965903	2.07E-65	6.31E-61
2	ENSMUSG00000040249	Lrp1	14.23216383	9.405720151	0.59754471	2.24E-64	6.83E-60
2	ENSMUSG00000029201	Ugdh	1.693418649	0.447738206	1.919211347	6.93E-63	2.11E-58
2	ENSMUSG00000033066	Gas7	2.022543223	0.858373917	1.236492391	1.13E-62	3.43E-58
2	ENSMUSG00000040488	Ltbp4	11.93848312	7.372996309	0.695296603	4.00E-62	1.22E-57
2	ENSMUSG00000032014	Oaf	2.910727887	1.480600987	0.975197079	1.12E-61	3.42E-57
2	ENSMUSG00000023224	Serping1	19.17068197	12.68141305	0.59618615	5.29E-61	1.61E-56
2	ENSMUSG00000055632	Hmcn2	3.984529009	1.751636024	1.185706175	1.20E-59	3.64E-55
2	ENSMUSG00000026249	Serpine2	4.760262826	2.577649529	0.88498511	2.99E-59	9.12E-55
2	ENSMUSG00000020019	Ntn4	2.181238646	0.908529694	1.263542048	5.72E-59	1.74E-54
2	ENSMUSG00000079017	Ifi27l2a	5.660323274	2.693586403	1.071356108	1.82E-56	5.55E-52
2	ENSMUSG00000028517	Plpp3	8.239362272	4.921848331	0.743332476	2.69E-56	8.20E-52
2	ENSMUSG00000029484	Anxa3	2.049693619	0.826845215	1.309719088	3.63E-55	1.11E-50
2	ENSMUSG00000024395	Lims2	1.404394994	0.605333074	1.214147676	6.09E-54	1.85E-49
2	ENSMUSG00000031548	Sfrp1	4.062098865	2.161942538	0.909897175	1.83E-53	5.59E-49
2	ENSMUSG00000018819	Lsp1	2.998264685	1.581939359	0.922433451	2.64E-53	8.06E-49
2	ENSMUSG00000019846	Lama4	10.70402236	6.95275984	0.622495373	2.65E-53	8.09E-49
2	ENSMUSG00000069833	Ahnak	8.621258817	5.339450157	0.691207353	1.69E-51	5.14E-47
2	ENSMUSG00000056973	Ces1d	1.834846181	0.767135513	1.258105769	4.42E-51	1.35E-46
2	ENSMUSG00000023868	Pde10a	2.245959052	0.851331172	1.399539264	3.31E-48	1.01E-43
2	ENSMUSG00000024084	Qpct	1.576019613	0.730712475	1.108909745	6.73E-47	2.05E-42
2	ENSMUSG00000004791	Pgf	1.659288732	0.728807985	1.186954279	6.81E-47	2.08E-42
2	ENSMUSG00000022098	Bmp1	2.063938442	0.955133793	1.1116252	4.26E-46	1.30E-41
2	ENSMUSG00000032440	Tgfbr2	3.895085048	2.245492509	0.79462292	1.22E-45	3.71E-41
2	ENSMUSG00000006800	Sulf2	2.459691858	1.339530568	0.876750088	4.46E-44	1.36E-39
2	ENSMUSG00000026728	Vim	6.927973651	4.62122992	0.584156573	9.68E-44	2.95E-39
2	ENSMUSG00000055148	Klf2	2.939235453	1.432266857	1.037140616	1.14E-43	3.48E-39
2	ENSMUSG00000020473	Aebp1	3.978449174	2.300586637	0.790204381	2.16E-43	6.58E-39
2	ENSMUSG00000001240	Ramp2	3.096161279	1.701757552	0.863455111	5.34E-43	1.63E-38
2	ENSMUSG00000024659	Anxa1	2.232817286	1.16792991	0.934911501	8.35E-42	2.55E-37
2	ENSMUSG00000020961	Ston2	1.60134772	0.803530337	0.994862213	1.22E-41	3.73E-37
2	ENSMUSG00000021388	Aspn	5.152548736	2.847631005	0.855524032	2.48E-41	7.56E-37
2	ENSMUSG00000055447	Cd47	5.448712054	3.62484304	0.587996725	9.26E-41	2.82E-36
2	ENSMUSG00000025584	Pde8a	1.368553171	0.512038207	1.418328118	1.12E-40	3.40E-36
2	ENSMUSG00000021876	Rnase4	6.015269236	3.893946703	0.627396174	2.32E-40	7.08E-36
2	ENSMUSG00000052684	Jun	1.963000092	0.954843952	1.039723359	4.00E-40	1.22E-35
2	ENSMUSG00000002900	Lamb1	9.312241313	6.299831303	0.563815247	6.30E-40	1.92E-35
2	ENSMUSG00000057098	Ebf1	20.66466081	12.98241438	0.670606973	1.59E-39	4.83E-35
2	ENSMUSG00000075254	Heg1	10.17310273	6.951075696	0.549451598	5.22E-39	1.59E-34
2	ENSMUSG00000003746	Man1a	6.699830422	4.421997482	0.599426376	6.27E-39	1.91E-34
2	ENSMUSG00000072235	Tuba1a	2.347464717	1.33817292	0.81083892	1.45E-38	4.43E-34
2	ENSMUSG00000022665	Ccdc80	13.82283565	9.85998067	0.487396881	2.07E-38	6.32E-34
2	ENSMUSG00000015085	Entpd2	4.300834165	2.820484133	0.608673683	1.83E-37	5.59E-33
2	ENSMUSG00000046982	Tshz1	1.502335784	0.768662906	0.966784349	3.66E-37	1.12E-32
2	ENSMUSG00000026389	Steap3	2.692780092	1.620793045	0.732396527	5.59E-37	1.70E-32
2	ENSMUSG00000016918	Sulf1	6.797371048	4.570583619	0.572598482	1.31E-36	4.01E-32
2	ENSMUSG00000018593	Sparc	10.62846345	7.517875236	0.499536164	1.46E-36	4.45E-32
2	ENSMUSG00000031447	Lamp1	5.631987891	3.802106766	0.566845188	9.79E-36	2.98E-31
2	ENSMUSG00000006386	Tek	2.760498625	1.622853962	0.766395702	2.42E-35	7.36E-31
2	ENSMUSG00000006360	Crip1	4.420555719	2.666752848	0.729143622	2.54E-35	7.75E-31
2	ENSMUSG00000058624	Gda	1.560236014	0.741499927	1.073245823	6.32E-35	1.93E-30
2	ENSMUSG00000020048	Hsp90b1	11.38629764	8.242211723	0.466195289	1.71E-34	5.21E-30
2	ENSMUSG00000060147	Serpinb6a	3.045600285	1.888758316	0.689288502	4.26E-34	1.30E-29
2	ENSMUSG00000025780	Itih5	1.903014735	1.141038339	0.737939465	6.49E-34	1.98E-29
2	ENSMUSG00000021047	Nova1	1.720918907	0.964044211	0.836007902	3.24E-33	9.87E-29
2	ENSMUSG00000024456	Diaph1	1.292988338	0.696311687	0.89290412	3.46E-33	1.06E-28
2	ENSMUSG00000026825	Dnm1	1.317900895	0.68265773	0.949007557	4.93E-33	1.50E-28
2	ENSMUSG00000020902	Ntn1	2.070734417	1.285700392	0.687588043	6.22E-33	1.89E-28
2	ENSMUSG00000025085	Ablim1	3.779097762	2.528476719	0.579773345	9.82E-33	2.99E-28
2	ENSMUSG00000027947	Il6ra	1.271310022	0.646480636	0.975636826	1.06E-32	3.23E-28
2	ENSMUSG00000019843	Fyn	2.946549701	1.787607896	0.720996279	1.34E-32	4.09E-28
2	ENSMUSG00000029718	Pcolce	5.233433091	3.526110665	0.5696799	2.01E-32	6.12E-28
2	ENSMUSG00000056612	Ppp1r14b	1.340034151	0.646868411	1.050725601	4.57E-32	1.39E-27
2	ENSMUSG00000000555	Itga5	1.477569397	0.756558149	0.965703015	4.85E-32	1.48E-27
2	ENSMUSG00000029580	Actb	7.649778269	5.11620328	0.580344344	9.79E-32	2.98E-27
2	ENSMUSG00000032231	Anxa2	2.299278344	1.370137723	0.746860209	1.35E-31	4.11E-27
2	ENSMUSG00000015839	Nfe2l2	1.940994598	1.082476165	0.842460844	1.73E-31	5.28E-27
2	ENSMUSG00000032334	Loxl1	5.407594474	3.659701639	0.563260929	4.04E-31	1.23E-26
2	ENSMUSG00000041959	S100a10	2.303501948	1.361642946	0.758480373	6.27E-31	1.91E-26
2	ENSMUSG00000037706	Cd81	7.668636074	5.69999522	0.428009297	3.26E-30	9.94E-26
2	ENSMUSG00000068566	Myadm	2.276550368	1.373549763	0.7289402	5.08E-30	1.55E-25
2	ENSMUSG00000031565	Fgfr1	4.009087601	2.759239489	0.53900326	9.07E-30	2.76E-25
2	ENSMUSG00000071076	Jund	2.298690924	1.41613132	0.698857443	1.05E-29	3.21E-25
2	ENSMUSG00000001119	Col6a1	6.847318285	5.050805066	0.439025713	2.37E-28	7.23E-24
2	ENSMUSG00000031555	Adam9	2.201055294	1.353825823	0.701153248	2.43E-28	7.39E-24
2	ENSMUSG00000026864	Hspa5	11.84421763	8.687490655	0.447171479	4.27E-28	1.30E-23
2	ENSMUSG00000003814	Calr	5.087197267	3.538841647	0.523593832	6.71E-28	2.04E-23
2	ENSMUSG00000032383	Ppib	6.012418184	4.377585779	0.457809909	1.64E-27	5.01E-23
2	ENSMUSG00000025130	P4hb	3.27338246	2.221457581	0.559275582	1.15E-26	3.52E-22
2	ENSMUSG00000021477	Ctsl	7.439654059	5.531208524	0.427640806	1.85E-26	5.63E-22
2	ENSMUSG00000017446	C1qtnf1	1.167513729	0.647761716	0.849904406	2.85E-26	8.69E-22
2	ENSMUSG00000031740	Mmp2	6.63307851	5.005763225	0.406088549	1.89E-25	5.75E-21
2	ENSMUSG00000028967	Errfi1	5.114060073	3.265843702	0.64701336	8.70E-25	2.65E-20
2	ENSMUSG00000028152	Tspan5	1.295343357	0.702974684	0.881789924	1.84E-24	5.59E-20
2	ENSMUSG00000028822	Tmem50a	3.319544205	2.239032827	0.568109484	1.93E-24	5.87E-20
2	ENSMUSG00000026837	Col5a1	5.37680996	3.890680066	0.46672813	3.72E-24	1.13E-19
2	ENSMUSG00000025647	Shisa5	1.586898481	0.985046859	0.687945576	3.98E-24	1.21E-19
2	ENSMUSG00000058135	Gstm1	3.072700154	2.097996826	0.550494495	4.37E-24	1.33E-19
2	ENSMUSG00000029659	Medag	4.005119168	2.872655353	0.479460253	6.24E-24	1.90E-19
2	ENSMUSG00000007041	Clic1	1.935377675	1.279158354	0.597420251	7.02E-24	2.14E-19
2	ENSMUSG00000009281	Rarres2	4.878155967	3.553482888	0.457102134	8.94E-24	2.72E-19
2	ENSMUSG00000046314	Stxbp6	2.456949265	1.733936171	0.502817275	9.57E-24	2.92E-19
2	ENSMUSG00000000957	Mmp14	2.671424064	1.794904949	0.573701562	1.04E-23	3.17E-19
2	ENSMUSG00000072941	Sod3	1.577548304	0.981084147	0.685235395	1.34E-23	4.08E-19
2	ENSMUSG00000027907	S100a11	2.231434776	1.391800437	0.681019273	1.36E-23	4.14E-19
2	ENSMUSG00000052911	Lamb2	3.015604488	2.032875591	0.568925298	2.43E-23	7.40E-19
2	ENSMUSG00000029178	Klf3	2.086511161	1.289455298	0.694330878	3.69E-23	1.12E-18
2	ENSMUSG00000015501	Hivep2	6.682766307	4.746870554	0.493468716	4.21E-23	1.28E-18
2	ENSMUSG00000022565	Plec	1.922436347	1.204072212	0.675013913	1.01E-22	3.09E-18
2	ENSMUSG00000068874	Selenbp1	1.683167645	1.054581821	0.674507845	2.17E-22	6.61E-18
2	ENSMUSG00000037060	Cavin3	1.150937188	0.667319419	0.786359709	2.24E-22	6.83E-18
2	ENSMUSG00000004044	Cavin1	1.334424217	0.868171225	0.620165864	2.86E-22	8.72E-18
2	ENSMUSG00000009291	Pttg1ip	1.833727827	1.229851788	0.576295058	3.26E-22	9.95E-18
2	ENSMUSG00000059588	Calcrl	2.779400084	1.952439299	0.509495824	4.51E-22	1.38E-17
2	ENSMUSG00000036545	Adamts2	3.583058895	2.660513884	0.429486825	6.12E-22	1.87E-17
2	ENSMUSG00000019818	Cd164	1.552329101	0.963605065	0.687920567	6.47E-22	1.97E-17
2	ENSMUSG00000029070	Mxra8	3.214506175	2.213646386	0.538172342	8.11E-22	2.47E-17
2	ENSMUSG00000050708	Ftl1	7.315007518	5.555571967	0.396923897	1.10E-21	3.36E-17
2	ENSMUSG00000041577	Prelp	4.399177722	3.413097758	0.366152149	1.22E-21	3.73E-17
2	ENSMUSG00000068798	Rap1a	2.51140755	1.798249856	0.481902679	1.43E-21	4.37E-17
2	ENSMUSG00000017969	Ptgis	3.454720616	2.540262966	0.443591193	2.50E-21	7.61E-17
2	ENSMUSG00000027864	Ptgfrn	1.563200103	1.043264088	0.583398065	2.81E-21	8.58E-17
2	ENSMUSG00000022883	Robo1	2.398039443	1.47226743	0.703815635	3.68E-21	1.12E-16
2	ENSMUSG00000074813	Morrbid	2.497030876	1.728861952	0.530390985	5.97E-21	1.82E-16
2	ENSMUSG00000020620	Abca8b	7.200022348	5.467014929	0.397248069	1.26E-20	3.84E-16
2	ENSMUSG00000021484	Lman2	1.074501318	0.692016502	0.634788906	1.30E-20	3.96E-16
2	ENSMUSG00000027248	Pdia3	5.808049101	4.430511825	0.390580278	2.98E-20	9.08E-16
2	ENSMUSG00000058835	Abi1	3.950819434	2.452123757	0.688120119	4.66E-20	1.42E-15
2	ENSMUSG00000052632	Asap2	1.135988826	0.723435694	0.651011958	5.17E-20	1.58E-15
2	ENSMUSG00000030062	Rpn1	2.225919851	1.543587529	0.528114353	5.80E-20	1.77E-15
2	ENSMUSG00000019806	Aig1	1.643294177	1.004488395	0.710129873	1.80E-19	5.50E-15
2	ENSMUSG00000021939	Ctsb	2.792934734	2.032244053	0.458708195	2.67E-19	8.13E-15
2	ENSMUSG00000037742	Eef1a1	5.764656622	4.276904333	0.430667738	2.86E-19	8.72E-15
2	ENSMUSG00000030208	Emp1	2.973479081	2.098105315	0.50306483	4.62E-19	1.41E-14
2	ENSMUSG00000061535	C1qtnf7	6.213211039	4.753195512	0.386441313	5.31E-19	1.62E-14
2	ENSMUSG00000079105	C7	4.075363616	2.811109012	0.535789385	5.33E-19	1.62E-14
2	ENSMUSG00000020571	Pdia6	3.912805407	2.902625639	0.430844849	5.38E-19	1.64E-14
2	ENSMUSG00000025026	Add3	3.114108653	2.315805977	0.427304895	5.94E-19	1.81E-14
2	ENSMUSG00000024190	Dusp1	1.25265059	0.798143809	0.650263432	9.51E-19	2.90E-14
2	ENSMUSG00000029767	Calu	3.384819348	2.490038876	0.442910571	9.54E-19	2.91E-14
2	ENSMUSG00000070436	Serpinh1	5.556254112	4.308536256	0.366914757	1.37E-18	4.17E-14
2	ENSMUSG00000029338	Antxr2	3.556054409	2.412859209	0.559533662	3.12E-18	9.51E-14
2	ENSMUSG00000055013	Agap1	2.589448484	1.811904813	0.51513769	4.45E-18	1.36E-13
2	ENSMUSG00000025203	Scd2	1.475031569	0.950447889	0.634066397	4.85E-18	1.48E-13
2	ENSMUSG00000029094	Afap1	1.361585605	0.883020279	0.624769214	5.85E-18	1.78E-13
2	ENSMUSG00000023092	Fhl1	1.44916308	0.932306537	0.636343668	8.29E-18	2.53E-13
2	ENSMUSG00000027642	Rpn2	2.176814223	1.526792099	0.511714662	9.57E-18	2.92E-13
2	ENSMUSG00000041736	Tspo	2.643595675	1.902812934	0.474367803	1.09E-17	3.32E-13
2	ENSMUSG00000060802	B2m	5.667453975	4.361924619	0.377735932	1.95E-17	5.96E-13
2	ENSMUSG00000038668	Lpar1	3.585742824	2.613329158	0.45638317	2.11E-17	6.44E-13
2	ENSMUSG00000029622	Arpc1b	1.3195029	0.840294504	0.651027569	3.43E-17	1.05E-12
2	ENSMUSG00000056629	Fkbp2	1.542166954	1.061480489	0.538881106	8.37E-17	2.55E-12
2	ENSMUSG00000045680	Tcf21	1.267942072	0.845077405	0.585333439	8.84E-17	2.69E-12
2	ENSMUSG00000042272	Sestd1	1.460309689	1.014174605	0.5259683	1.01E-16	3.07E-12
2	ENSMUSG00000020227	Irak3	1.21191508	0.813521754	0.575035781	1.37E-16	4.18E-12
2	ENSMUSG00000032412	Atp1b3	1.504828663	1.087099961	0.469114628	1.41E-16	4.31E-12
2	ENSMUSG00000032855	Pkd1	3.109278488	2.325322677	0.419148912	1.70E-16	5.18E-12
2	ENSMUSG00000057738	Sptan1	2.752205178	1.989653214	0.468071029	1.86E-16	5.68E-12
2	ENSMUSG00000027087	Itgav	1.752663748	1.217365176	0.525787237	1.96E-16	5.96E-12
2	ENSMUSG00000090841	Myl6	2.721770788	1.96761011	0.468101203	2.52E-16	7.70E-12
2	ENSMUSG00000068220	Lgals1	2.782044178	2.116835159	0.3942364	2.69E-16	8.19E-12
2	ENSMUSG00000031799	Tpm4	1.652921742	1.103679108	0.582697649	3.05E-16	9.29E-12
2	ENSMUSG00000050965	Prkca	3.451037749	2.61735276	0.398921874	3.39E-16	1.03E-11
2	ENSMUSG00000035107	Dcbld2	1.730146318	1.153584563	0.584770288	4.79E-16	1.46E-11
2	ENSMUSG00000032575	Manf	3.042092142	2.329024467	0.385338056	5.20E-16	1.59E-11
2	ENSMUSG00000019877	Serinc1	2.374541505	1.844722988	0.364244783	7.34E-16	2.24E-11
2	ENSMUSG00000029478	Ncor2	1.389278605	0.990906499	0.487515107	1.03E-15	3.14E-11
2	ENSMUSG00000079523	Tmsb10	2.300289934	1.666359731	0.465115832	1.05E-15	3.19E-11
2	ENSMUSG00000026674	Ddr2	3.658258424	2.650936208	0.464655039	1.27E-15	3.86E-11
2	ENSMUSG00000004460	Dnajb11	1.518864988	1.03805837	0.549106065	2.58E-15	7.87E-11
2	ENSMUSG00000020111	Micu1	1.259224916	0.84866492	0.569269044	3.79E-15	1.16E-10
2	ENSMUSG00000072294	Klf12	2.56242838	1.974725512	0.37585955	5.21E-15	1.59E-10
2	ENSMUSG00000024425	Ndfip1	3.739960594	2.909562912	0.362220628	6.69E-15	2.04E-10
2	ENSMUSG00000038991	Txndc5	1.603997532	1.174701496	0.449377722	7.37E-15	2.25E-10
2	ENSMUSG00000006519	Cyba	2.592558852	1.922792018	0.431174019	9.51E-15	2.90E-10
2	ENSMUSG00000060012	Kif13b	3.853984254	2.977449106	0.372273829	1.45E-14	4.41E-10
2	ENSMUSG00000001891	Ugp2	3.04828362	2.264089812	0.429065953	1.87E-14	5.70E-10
2	ENSMUSG00000024143	Rhoq	1.969615047	1.424233276	0.467728223	3.23E-14	9.86E-10
2	ENSMUSG00000025935	Tram1	1.752596426	1.289944453	0.44218488	3.68E-14	1.12E-09
2	ENSMUSG00000007815	Rhoa	2.807823007	2.16613543	0.374328552	3.71E-14	1.13E-09
2	ENSMUSG00000037072	Selenof	2.645164796	2.016889011	0.391225912	4.12E-14	1.25E-09
2	ENSMUSG00000042747	Krtcap2	2.524825139	1.930520422	0.387193659	4.54E-14	1.38E-09
2	ENSMUSG00000029061	Mmp23	1.488708043	1.096219612	0.441523999	5.32E-14	1.62E-09
2	ENSMUSG00000037499	Nenf	2.894545432	2.246020068	0.365965983	5.51E-14	1.68E-09
2	ENSMUSG00000035227	Spcs2	1.615963416	1.189878263	0.441580559	8.53E-14	2.60E-09
2	ENSMUSG00000020484	Xbp1	2.262157204	1.757668408	0.364036265	9.89E-14	3.02E-09
2	ENSMUSG00000042682	Selenok	2.551847552	1.986357915	0.361416545	1.14E-13	3.47E-09
2	ENSMUSG00000038034	Igsf8	1.236065244	0.838403754	0.560037814	1.37E-13	4.18E-09
2	ENSMUSG00000033420	Antxr1	3.429245026	2.518264191	0.445461347	1.72E-13	5.23E-09
2	ENSMUSG00000032336	Nptn	2.537226438	1.942096531	0.38563737	2.24E-13	6.82E-09
2	ENSMUSG00000042364	Snx18	1.218797894	0.873084608	0.481265539	2.46E-13	7.49E-09
2	ENSMUSG00000011256	Adam19	2.360451956	1.834920311	0.36334571	2.52E-13	7.67E-09
2	ENSMUSG00000052957	Gas1	4.975146906	3.785509645	0.394251582	2.68E-13	8.16E-09
2	ENSMUSG00000031093	Dock11	1.674978225	1.162079212	0.527433929	3.00E-13	9.15E-09
2	ENSMUSG00000030447	Cyfip1	1.663418161	1.243273009	0.420007758	3.22E-13	9.82E-09
2	ENSMUSG00000032328	Tmem30a	1.851112381	1.410376313	0.392312334	3.26E-13	9.94E-09
2	ENSMUSG00000029234	Tmem165	1.22736658	0.939259658	0.385970255	4.73E-13	1.44E-08
2	ENSMUSG00000022263	Trio	2.025427185	1.534104313	0.400829636	4.86E-13	1.48E-08
2	ENSMUSG00000052681	Rap1b	1.484997439	1.091555073	0.444075521	5.33E-13	1.63E-08
2	ENSMUSG00000029616	Erp29	1.523826575	1.069258448	0.511088115	7.33E-13	2.23E-08
2	ENSMUSG00000029050	Ski	1.757396796	1.349091833	0.381451413	1.26E-12	3.84E-08
2	ENSMUSG00000035199	Arl6ip5	1.348211174	1.020528072	0.40173062	1.31E-12	3.98E-08
2	ENSMUSG00000027878	Notch2	1.722176445	1.330211141	0.372577702	1.55E-12	4.72E-08
2	ENSMUSG00000032353	Tmed3	1.814490789	1.379461297	0.395459753	2.17E-12	6.60E-08
2	ENSMUSG00000048537	Phldb1	1.630503026	1.209306001	0.43113777	3.08E-12	9.39E-08
2	ENSMUSG00000035863	Palm	1.321574781	0.964277873	0.454737213	3.64E-12	1.11E-07
2	ENSMUSG00000057335	Cep170	2.36009747	1.788501177	0.400095375	3.72E-12	1.13E-07
2	ENSMUSG00000040339	Fam102b	1.197366317	0.867019748	0.465727832	4.72E-12	1.44E-07
2	ENSMUSG00000033880	Lgals3bp	1.226148219	0.820364366	0.579796652	4.76E-12	1.45E-07
2	ENSMUSG00000061689	Dlgap4	1.15458305	0.836685881	0.464613955	5.14E-12	1.57E-07
2	ENSMUSG00000030717	Nupr1	1.544455955	1.151069713	0.424123517	5.52E-12	1.68E-07
2	ENSMUSG00000020841	Cpd	1.264654102	0.953239055	0.407832878	6.46E-12	1.97E-07
2	ENSMUSG00000002778	Kdelr1	1.338047148	0.969132336	0.465363367	8.83E-12	2.69E-07
2	ENSMUSG00000022043	Trim35	1.296582502	0.970891642	0.417331813	1.04E-11	3.17E-07
2	ENSMUSG00000021094	Dhrs7	1.403907699	1.075914954	0.383884044	1.15E-11	3.50E-07
2	ENSMUSG00000030536	Iqgap1	1.945631324	1.492544286	0.382464622	1.23E-11	3.76E-07
2	ENSMUSG00000036461	Elf1	1.958610766	1.520972652	0.364836507	1.58E-11	4.81E-07
2	ENSMUSG00000034708	Grn	1.708968335	1.311741756	0.381641942	2.02E-11	6.14E-07
2	ENSMUSG00000039953	Clstn1	1.599833289	1.16109322	0.46243777	2.02E-11	6.15E-07
2	ENSMUSG00000031328	Flna	1.45393786	1.082050163	0.426198228	2.43E-11	7.39E-07
2	ENSMUSG00000030654	Arl6ip1	1.352875034	0.951850508	0.507221668	2.54E-11	7.73E-07
2	ENSMUSG00000030824	Nucb1	1.235123728	0.913738066	0.434803006	3.18E-11	9.69E-07
2	ENSMUSG00000021693	Kif2a	1.302192839	0.955536205	0.446560667	3.25E-11	9.92E-07
2	ENSMUSG00000038776	Ephx1	1.118714381	0.810737823	0.464534393	3.99E-11	1.22E-06
2	ENSMUSG00000021794	Glud1	1.591756702	1.152474112	0.465885495	6.68E-11	2.03E-06
2	ENSMUSG00000042116	Vwa1	1.52142647	1.134178277	0.42377718	7.52E-11	2.29E-06
2	ENSMUSG00000030852	Tacc2	1.480993698	1.144548106	0.3717874	1.03E-10	3.14E-06
2	ENSMUSG00000038633	Degs1	1.292317838	1.001427685	0.367902691	1.11E-10	3.38E-06
2	ENSMUSG00000027366	Sppl2a	1.408695525	1.064865394	0.403688746	1.16E-10	3.53E-06
2	ENSMUSG00000054814	Usp46	1.293927386	0.95611446	0.436501413	1.41E-10	4.30E-06
2	ENSMUSG00000027006	Dnajc10	1.624430702	1.233500143	0.397176317	2.21E-10	6.73E-06
2	ENSMUSG00000056429	Tgoln1	1.72656122	1.341904501	0.363619486	2.30E-10	7.00E-06
2	ENSMUSG00000021270	Hsp90aa1	1.411202825	1.059584546	0.413426647	4.67E-10	1.42E-05
2	ENSMUSG00000041355	Ssr2	1.159532418	0.897707792	0.369225333	4.80E-10	1.46E-05
2	ENSMUSG00000030189	Ybx3	1.29530989	1.005895782	0.364816451	6.61E-10	2.01E-05
2	ENSMUSG00000052698	Tln2	1.422248057	1.097748495	0.373625554	1.52E-09	4.65E-05
2	ENSMUSG00000002015	Bcap31	1.557555298	1.197444874	0.379324143	2.19E-09	6.67E-05
2	ENSMUSG00000046447	Camk2n1	1.117536659	0.831013924	0.427377603	2.28E-09	6.94E-05
2	ENSMUSG00000049550	Clip1	1.790286951	1.385820919	0.369450005	2.41E-09	7.36E-05
2	ENSMUSG00000052593	Adam17	1.124590303	0.874896472	0.362215297	4.65E-09	0.000141693
2	ENSMUSG00000039115	Itga9	1.538578511	1.190871258	0.369580609	5.70E-09	0.000173626
2	ENSMUSG00000018736	Ndel1	1.221624184	0.942896896	0.3736286	1.49E-08	0.000453618
2	ENSMUSG00000034390	Cmip	1.33813857	1.038917564	0.365146337	1.68E-07	0.005126179
2	ENSMUSG00000018363	Smurf2	2.012937655	1.533456293	0.392515443	1.69E-07	0.005140979
3	ENSMUSG00000040752	Myh6	89.94412201	27.14635835	1.728270327	4.08E-184	1.24E-179
3	ENSMUSG00000051747	Ttn	75.62498789	15.0550178	2.328618592	1.97E-165	6.01E-161
3	ENSMUSG00000064351	mt-Co1	118.0476683	61.61781443	0.937950129	1.12E-150	3.42E-146
3	ENSMUSG00000029467	Atp2a2	49.50790507	14.21479848	1.800265257	2.96E-129	9.02E-125
3	ENSMUSG00000064358	mt-Co3	104.1479098	57.58402612	0.854893319	1.90E-115	5.80E-111
3	ENSMUSG00000038239	Hrc	5.263063464	0.935705867	2.491775787	9.52E-115	2.90E-110
3	ENSMUSG00000064354	mt-Co2	78.11597806	42.2873822	0.885390418	2.27E-114	6.91E-110
3	ENSMUSG00000064363	mt-Nd4	44.58580794	22.85661118	0.963973041	2.66E-106	8.12E-102
3	ENSMUSG00000021313	Ryr2	7.920584546	1.683302331	2.23431259	1.21E-105	3.70E-101
3	ENSMUSG00000028773	Fabp3	33.41499312	16.54300897	1.01427391	1.37E-103	4.19E-99
3	ENSMUSG00000031633	Slc25a4	33.55495325	15.71342426	1.094528141	1.52E-100	4.65E-96
3	ENSMUSG00000018893	Mb	33.43764728	15.99197542	1.064125182	2.31E-97	7.03E-93
3	ENSMUSG00000032366	Tpm1	60.63926743	30.91236176	0.972068442	9.77E-95	2.98E-90
3	ENSMUSG00000026414	Tnnt2	43.93250384	19.66308689	1.159798899	9.65E-92	2.94E-87
3	ENSMUSG00000064370	mt-Cytb	51.93052889	28.90156648	0.845435229	3.50E-85	1.07E-80
3	ENSMUSG00000030785	Cox6a2	27.15318465	12.76031615	1.089457341	1.33E-84	4.05E-80
3	ENSMUSG00000068614	Actc1	26.12298524	12.18100452	1.100686661	3.26E-84	9.93E-80
3	ENSMUSG00000013936	Myl2	42.31974686	21.94898864	0.947176532	6.26E-84	1.91E-79
3	ENSMUSG00000059741	Myl3	42.44919884	22.10090899	0.941631618	4.62E-73	1.41E-68
3	ENSMUSG00000064345	mt-Nd2	33.10934637	17.91230305	0.886287688	1.38E-72	4.20E-68
3	ENSMUSG00000035458	Tnni3	36.93157728	18.94765822	0.962835325	2.50E-71	7.61E-67
3	ENSMUSG00000038583	Pln	17.32070823	8.386684571	1.046325421	3.56E-71	1.08E-66
3	ENSMUSG00000064341	mt-Nd1	33.34888439	18.38660673	0.858983247	5.44E-70	1.66E-65
3	ENSMUSG00000019787	Trdn	5.321749248	1.360885984	1.967354332	1.28E-69	3.90E-65
3	ENSMUSG00000031818	Cox4i1	23.46369349	12.27388423	0.934838249	5.52E-68	1.68E-63
3	ENSMUSG00000002944	Cd36	6.387325715	1.796820149	1.82976601	2.99E-67	9.10E-63
3	ENSMUSG00000064357	mt-Atp6	64.17777178	39.46689667	0.701430618	1.29E-66	3.93E-62
3	ENSMUSG00000022037	Clu	3.161224288	0.684153591	2.20809125	5.39E-66	1.64E-61
3	ENSMUSG00000014313	Cox6c	17.03517789	8.760487753	0.959433911	1.29E-59	3.94E-55
3	ENSMUSG00000053898	Ech1	9.77657686	4.364238054	1.163599615	1.51E-57	4.61E-53
3	ENSMUSG00000024049	Myom1	4.947839061	1.413898023	1.807120505	1.66E-55	5.05E-51
3	ENSMUSG00000054889	Dsp	4.125793114	1.148197324	1.845300882	2.96E-54	9.03E-50
3	ENSMUSG00000029632	Ndufa4	15.41103014	7.684626418	1.003916269	1.13E-53	3.45E-49
3	ENSMUSG00000025393	Atp5b	11.58311226	5.582648435	1.053001331	4.56E-53	1.39E-48
3	ENSMUSG00000023175	Bsg	8.52759764	3.234494003	1.398599331	2.28E-51	6.94E-47
3	ENSMUSG00000027022	Xirp2	3.873466845	1.014984819	1.932167241	2.57E-51	7.85E-47
3	ENSMUSG00000034566	Atp5h	14.51853413	7.616335353	0.930726891	4.28E-51	1.31E-46
3	ENSMUSG00000022354	Ndufb9	11.79653402	5.731475605	1.041384515	9.86E-51	3.01E-46
3	ENSMUSG00000032060	Cryab	14.80955275	7.399857985	1.000958583	6.15E-50	1.87E-45
3	ENSMUSG00000064367	mt-Nd5	12.18371406	5.996589488	1.022739871	1.45E-49	4.43E-45
3	ENSMUSG00000026208	Des	6.582303793	2.387541712	1.463066674	1.04E-46	3.17E-42
3	ENSMUSG00000017778	Cox7c	14.62686723	7.893717753	0.889843967	2.50E-46	7.63E-42
3	ENSMUSG00000091898	Tnnc1	15.92434084	8.574298221	0.893143154	2.97E-46	9.06E-42
3	ENSMUSG00000070493	Chchd2	11.57393447	6.160974165	0.909648989	1.56E-45	4.76E-41
3	ENSMUSG00000022748	Cmss1	26.53613505	15.55814683	0.770288032	2.67E-45	8.15E-41
3	ENSMUSG00000006057	Atp5g1	15.7897832	8.78709469	0.845533217	3.76E-45	1.14E-40
3	ENSMUSG00000015568	Lpl	18.31997157	8.928665728	1.03690076	3.61E-44	1.10E-39
3	ENSMUSG00000025428	Atp5a1	12.32864483	6.311219911	0.966023428	4.08E-44	1.24E-39
3	ENSMUSG00000030541	Idh2	7.66096127	3.362475219	1.188001792	7.36E-44	2.24E-39
3	ENSMUSG00000031461	Myom2	3.825521277	1.147817383	1.736763219	9.60E-42	2.93E-37
3	ENSMUSG00000000088	Cox5a	12.73209657	6.765774291	0.912143051	1.01E-41	3.08E-37
3	ENSMUSG00000015090	Ptgds	2.73743748	0.678433856	2.012545944	2.47E-41	7.54E-37
3	ENSMUSG00000052374	Actn2	4.314658184	1.510671986	1.51405583	7.21E-41	2.20E-36
3	ENSMUSG00000000563	Atp5pb	7.821693286	3.827822707	1.030956954	3.45E-40	1.05E-35
3	ENSMUSG00000036199	Ndufa13	9.27643365	4.798013491	0.95113305	2.35E-38	7.15E-34
3	ENSMUSG00000029019	Nppb	3.674240219	0.888519495	2.047970616	7.08E-37	2.16E-32
3	ENSMUSG00000004610	Etfb	6.164163763	2.786518333	1.145441545	7.54E-36	2.30E-31
3	ENSMUSG00000030695	Aldoa	7.259999582	3.78768114	0.93865458	1.25E-35	3.80E-31
3	ENSMUSG00000030399	Ckm	7.281183185	3.336371561	1.12589294	3.21E-35	9.78E-31
3	ENSMUSG00000038690	Atp5j2	9.664494335	5.4218951	0.833897049	7.87E-35	2.40E-30
3	ENSMUSG00000031698	Mylk3	1.91587833	0.548678026	1.803974239	1.55E-34	4.73E-30
3	ENSMUSG00000022890	Atp5j	9.992886774	5.262998087	0.925016638	4.12E-34	1.26E-29
3	ENSMUSG00000059447	Hadhb	5.804033981	2.507689157	1.210697437	5.73E-33	1.75E-28
3	ENSMUSG00000021520	Uqcrb	8.29795218	4.376950909	0.92282914	8.76E-33	2.67E-28
3	ENSMUSG00000023089	Ndufa5	7.769489603	3.721346665	1.061995035	1.50E-32	4.56E-28
3	ENSMUSG00000016252	Atp5e	8.980786281	4.817946432	0.898423407	3.10E-32	9.46E-28
3	ENSMUSG00000061904	Slc25a3	7.444959659	3.656087895	1.025963277	3.87E-32	1.18E-27
3	ENSMUSG00000018770	Atp5g3	6.919522706	3.40582698	1.022667381	4.24E-32	1.29E-27
3	ENSMUSG00000025745	Hadha	6.178123822	3.00539586	1.039613756	6.84E-32	2.08E-27
3	ENSMUSG00000002100	Mybpc3	4.926256057	2.142084705	1.201476088	1.51E-31	4.59E-27
3	ENSMUSG00000031231	Cox7b	10.13641554	5.36797485	0.917097757	1.69E-31	5.16E-27
3	ENSMUSG00000021622	Ckmt2	7.002248679	3.054663246	1.196804957	3.08E-31	9.40E-27
3	ENSMUSG00000026003	Acadl	6.607813567	3.0809003	1.100820987	4.75E-31	1.45E-26
3	ENSMUSG00000038717	Atp5l	8.285098529	4.618674767	0.843039895	9.81E-31	2.99E-26
3	ENSMUSG00000057666	Gapdh	7.779526519	3.944530702	0.979828685	1.19E-30	3.62E-26
3	ENSMUSG00000024661	Fth1	20.12123419	13.14741405	0.613939734	2.51E-30	7.66E-26
3	ENSMUSG00000060126	Tpt1	15.01602244	9.345055897	0.684227512	1.22E-29	3.73E-25
3	ENSMUSG00000039103	Nexn	4.89942065	2.080611934	1.235603257	7.96E-29	2.43E-24
3	ENSMUSG00000020163	Uqcr11	8.320317093	4.359111731	0.932604329	8.26E-29	2.52E-24
3	ENSMUSG00000020321	Mdh1	6.83468408	3.494942983	0.967605734	2.68E-28	8.15E-24
3	ENSMUSG00000036751	Cox6b1	7.55203055	4.166623659	0.857985803	5.08E-28	1.55E-23
3	ENSMUSG00000013593	Ndufs2	3.60624912	1.547889223	1.220196835	8.23E-28	2.51E-23
3	ENSMUSG00000060600	Eno3	3.669310806	1.661177392	1.143302969	9.57E-28	2.92E-23
3	ENSMUSG00000062908	Acadm	5.624415188	2.642330026	1.089892426	1.24E-27	3.77E-23
3	ENSMUSG00000025204	Ndufb8	6.816952289	3.659117687	0.897631069	1.68E-27	5.12E-23
3	ENSMUSG00000063694	Cycs	7.662387371	4.212396294	0.863152794	1.99E-27	6.05E-23
3	ENSMUSG00000018574	Acadvl	3.224600472	1.268310651	1.346212269	4.95E-27	1.51E-22
3	ENSMUSG00000025488	Cox8b	8.169452909	4.408525747	0.889943182	7.71E-27	2.35E-22
3	ENSMUSG00000033161	Atp1a1	3.61880809	1.406087688	1.363828034	8.74E-27	2.66E-22
3	ENSMUSG00000022803	Popdc2	1.975298425	0.62082479	1.669812557	2.69E-26	8.20E-22
3	ENSMUSG00000030246	Ldhb	5.608689642	2.818640847	0.992664093	3.08E-26	9.38E-22
3	ENSMUSG00000025781	Atp5c1	6.83764738	3.779149631	0.855438383	6.05E-26	1.84E-21
3	ENSMUSG00000061518	Cox5b	8.068879598	4.650489258	0.794985858	7.30E-26	2.22E-21
3	ENSMUSG00000031448	Adprhl1	2.9010551	1.15545696	1.328114175	7.72E-25	2.35E-20
3	ENSMUSG00000020153	Ndufs7	4.641717449	2.249385681	1.045127658	7.85E-25	2.39E-20
3	ENSMUSG00000024803	Ankrd1	4.660773531	2.059373186	1.178364124	1.34E-24	4.10E-20
3	ENSMUSG00000022956	Atp5o	7.848671644	4.296428612	0.86931058	1.66E-24	5.06E-20
3	ENSMUSG00000050856	Atp5k	6.356543694	3.378669135	0.91178745	1.68E-24	5.11E-20
3	ENSMUSG00000038462	Uqcrfs1	4.738071015	2.166857191	1.128695748	1.69E-24	5.16E-20
3	ENSMUSG00000003072	Atp5d	5.706671364	2.917908097	0.967715039	1.84E-24	5.62E-20
3	ENSMUSG00000030869	Ndufab1	7.431492399	3.78680542	0.972670671	1.98E-24	6.04E-20
3	ENSMUSG00000007877	Tcap	4.454382627	2.094657531	1.088511101	2.08E-24	6.35E-20
3	ENSMUSG00000039145	Camk1d	13.29186977	7.946643012	0.742126622	2.65E-24	8.08E-20
3	ENSMUSG00000007892	Rplp1	10.90988657	6.583599166	0.728687695	2.76E-24	8.41E-20
3	ENSMUSG00000030470	Csrp3	7.277284413	4.151461372	0.809780921	9.09E-24	2.77E-19
3	ENSMUSG00000006818	Sod2	3.910670458	1.884845954	1.052969351	9.42E-24	2.87E-19
3	ENSMUSG00000022477	Aco2	4.71438578	2.282920645	1.046189108	1.11E-23	3.38E-19
3	ENSMUSG00000075706	Gpx4	6.60067572	3.521519161	0.90641579	1.62E-23	4.94E-19
3	ENSMUSG00000064368	mt-Nd6	6.158988313	2.777504199	1.148904298	2.45E-23	7.46E-19
3	ENSMUSG00000019179	Mdh2	4.686347017	2.227579126	1.072987109	2.95E-23	8.98E-19
3	ENSMUSG00000025651	Uqcrc1	3.157911679	1.378015749	1.196378446	3.57E-23	1.09E-18
3	ENSMUSG00000031059	Ndufb11	6.452236998	3.294229606	0.969858318	5.04E-23	1.54E-18
3	ENSMUSG00000036880	Acaa2	4.634087086	2.295921455	1.013211869	1.69E-22	5.16E-18
3	ENSMUSG00000006221	Hspb7	3.134730272	1.312377918	1.256158087	6.14E-22	1.87E-17
3	ENSMUSG00000004207	Psap	7.300001016	4.057054806	0.847463873	6.50E-22	1.98E-17
3	ENSMUSG00000032330	Cox7a2	6.461482694	3.698293328	0.805005597	7.88E-22	2.40E-17
3	ENSMUSG00000025968	Ndufs1	2.893150424	1.399649639	1.0475756	1.57E-21	4.78E-17
3	ENSMUSG00000047419	Cmya5	2.575133508	0.99213167	1.376043726	2.38E-21	7.24E-17
3	ENSMUSG00000039891	Txlnb	2.490896038	0.99850022	1.318830158	2.49E-21	7.59E-17
3	ENSMUSG00000008136	Fhl2	4.712214642	2.143629184	1.136349893	8.58E-21	2.62E-16
3	ENSMUSG00000049422	Chchd10	9.386673732	5.546104451	0.759139227	1.43E-20	4.37E-16
3	ENSMUSG00000071415	Rpl23	9.538944388	5.683826914	0.746967	2.91E-20	8.87E-16
3	ENSMUSG00000074218	Cox7a1	5.409864079	2.943943908	0.877842164	3.97E-20	1.21E-15
3	ENSMUSG00000044080	S100a1	5.895187657	3.235280978	0.865646725	5.62E-20	1.71E-15
3	ENSMUSG00000034892	Rps29	8.696710594	5.221658007	0.735961854	9.18E-20	2.80E-15
3	ENSMUSG00000071528	Atp5md	5.745232657	3.158833	0.86297365	3.43E-19	1.04E-14
3	ENSMUSG00000044894	Uqcrq	7.005049747	3.97731378	0.816600912	3.56E-19	1.08E-14
3	ENSMUSG00000035530	Eif1	9.559241604	6.424544222	0.573302056	5.16E-19	1.57E-14
3	ENSMUSG00000025290	Rps24	8.546345472	5.047680278	0.759687104	9.50E-19	2.90E-14
3	ENSMUSG00000028648	Ndufs5	4.506770281	2.426384985	0.893285439	1.01E-17	3.08E-13
3	ENSMUSG00000063882	Uqcrh	7.090821898	4.217905444	0.749426107	1.26E-17	3.83E-13
3	ENSMUSG00000028116	Myoz2	2.666282576	1.311209105	1.02393191	1.56E-17	4.76E-13
3	ENSMUSG00000008668	Rps18	5.017887992	2.718092106	0.884485923	1.60E-17	4.89E-13
3	ENSMUSG00000022551	Cyc1	3.827867829	1.960538849	0.965290787	1.63E-17	4.96E-13
3	ENSMUSG00000015656	Hspa8	6.742025639	3.952384199	0.77045892	4.29E-17	1.31E-12
3	ENSMUSG00000020475	Pgam2	2.627534138	1.276668768	1.041325242	5.62E-17	1.71E-12
3	ENSMUSG00000037710	Cisd1	2.939583643	1.386188495	1.08448838	6.76E-17	2.06E-12
3	ENSMUSG00000035674	Ndufa3	4.327188302	2.201891501	0.974686521	7.08E-17	2.16E-12
3	ENSMUSG00000041881	Ndufa7	3.911611208	2.112188418	0.889024446	9.28E-17	2.83E-12
3	ENSMUSG00000023944	Hsp90ab1	9.063510229	5.95906929	0.60498288	1.51E-16	4.60E-12
3	ENSMUSG00000026260	Ndufa10	2.783285142	1.278881536	1.121906085	1.54E-16	4.68E-12
3	ENSMUSG00000026032	Ndufb3	3.129543728	1.614291429	0.955051282	1.54E-16	4.70E-12
3	ENSMUSG00000028081	Rps3a1	7.249290139	4.163845634	0.799923146	2.38E-16	7.26E-12
3	ENSMUSG00000061462	Obscn	1.858784137	0.76498643	1.280853177	2.94E-16	8.97E-12
3	ENSMUSG00000025508	Rplp2	5.515777242	3.08996972	0.835971493	4.18E-16	1.27E-11
3	ENSMUSG00000040048	Ndufb10	6.108727804	3.481991179	0.810959409	4.67E-16	1.42E-11
3	ENSMUSG00000003970	Rpl8	5.983812169	3.54819112	0.753981169	5.52E-16	1.68E-11
3	ENSMUSG00000059534	Uqcr10	4.760738368	2.521536015	0.916882515	1.13E-15	3.46E-11
3	ENSMUSG00000027673	Ndufb5	4.826728114	2.710679443	0.832391048	2.55E-15	7.77E-11
3	ENSMUSG00000023861	Mpc1	4.553279799	2.70723281	0.750087157	2.66E-15	8.10E-11
3	ENSMUSG00000027602	Map1lc3a	3.676755398	1.916960144	0.93961286	4.27E-15	1.30E-10
3	ENSMUSG00000025190	Got1	2.537390926	1.14737096	1.145013898	4.49E-15	1.37E-10
3	ENSMUSG00000002379	Ndufa11	4.766257322	2.723367313	0.807465264	6.61E-15	2.02E-10
3	ENSMUSG00000037152	Ndufc1	4.788212964	2.66015554	0.847976717	9.72E-15	2.96E-10
3	ENSMUSG00000065947	mt-Nd4l	4.159641946	2.146110118	0.954735246	1.16E-14	3.53E-10
3	ENSMUSG00000033938	Ndufb7	4.933871922	2.613231221	0.916885484	2.04E-14	6.21E-10
3	ENSMUSG00000041028	Ghitm	2.326195098	1.047927629	1.150433014	2.90E-14	8.84E-10
3	ENSMUSG00000021606	Ndufs6	3.641167096	2.103287062	0.791755183	3.03E-14	9.23E-10
3	ENSMUSG00000026568	Mpc2	5.390409844	3.256424151	0.727106345	3.21E-14	9.77E-10
3	ENSMUSG00000021290	Atp5mpl	4.457188479	2.362970127	0.915532578	3.85E-14	1.17E-09
3	ENSMUSG00000038170	Pde4dip	3.301718336	1.585310265	1.05845183	5.43E-14	1.65E-09
3	ENSMUSG00000009863	Sdhb	3.99433726	2.180954216	0.872996667	6.33E-14	1.93E-09
3	ENSMUSG00000012848	Rps5	5.641308067	3.168355639	0.83229544	6.93E-14	2.11E-09
3	ENSMUSG00000018796	Acsl1	1.719564867	0.765635034	1.167314788	8.24E-14	2.51E-09
3	ENSMUSG00000037916	Ndufv1	2.157419264	1.109386938	0.959543926	1.02E-13	3.11E-09
3	ENSMUSG00000020402	Vdac1	3.179691972	1.706521163	0.897828708	1.16E-13	3.52E-09
3	ENSMUSG00000006356	Crip2	5.43725809	3.320940873	0.711287273	1.17E-13	3.56E-09
3	ENSMUSG00000064360	mt-Nd3	5.546794027	3.321325508	0.739895032	2.01E-13	6.14E-09
3	ENSMUSG00000062683	Atp5g2	4.106736633	2.24112068	0.873772093	2.45E-13	7.47E-09
3	ENSMUSG00000021771	Vdac2	2.487100796	1.210782854	1.038524827	2.92E-13	8.89E-09
3	ENSMUSG00000052337	Immt	3.155585327	1.589150563	0.989651816	3.82E-13	1.16E-08
3	ENSMUSG00000060636	Rpl35a	5.916619874	3.308530366	0.838582688	4.65E-13	1.42E-08
3	ENSMUSG00000049775	Tmsb4x	7.027691058	4.436200864	0.663726081	6.23E-13	1.90E-08
3	ENSMUSG00000031299	Pdha1	2.825611437	1.425625179	0.986968365	8.44E-13	2.57E-08
3	ENSMUSG00000026895	Ndufa8	3.276923075	1.831865744	0.839028033	8.75E-13	2.67E-08
3	ENSMUSG00000058600	Rpl30	6.073784172	3.616970722	0.747813724	1.14E-12	3.47E-08
3	ENSMUSG00000006717	Acot13	2.653358086	1.452515698	0.869265633	1.19E-12	3.62E-08
3	ENSMUSG00000006333	Rps9	6.08600931	3.774749506	0.689115631	1.31E-12	3.99E-08
3	ENSMUSG00000024038	Ndufv3	3.380730026	1.782915727	0.923096299	2.46E-12	7.49E-08
3	ENSMUSG00000000740	Rpl13	10.27123272	6.771543146	0.601052792	2.69E-12	8.20E-08
3	ENSMUSG00000022186	Oxct1	3.389995358	1.975134856	0.779332139	3.08E-12	9.39E-08
3	ENSMUSG00000029683	Lmod2	2.463728554	1.19876488	1.03929459	3.91E-12	1.19E-07
3	ENSMUSG00000062515	Fabp4	7.434346948	4.446607318	0.741501012	4.65E-12	1.42E-07
3	ENSMUSG00000079641	Rpl39	4.289263712	2.250704522	0.93035335	6.24E-12	1.90E-07
3	ENSMUSG00000012405	Rpl15	4.778032815	2.794853301	0.773644203	7.23E-12	2.20E-07
3	ENSMUSG00000003429	Rps11	4.863523941	2.887528424	0.752166871	8.21E-12	2.50E-07
3	ENSMUSG00000014294	Ndufa2	4.700137506	2.590362046	0.859549212	8.89E-12	2.71E-07
3	ENSMUSG00000024099	Ndufv2	3.201171108	1.829362631	0.807258708	8.92E-12	2.72E-07
3	ENSMUSG00000004951	Hspb1	2.543122812	1.335752713	0.928948187	1.01E-11	3.08E-07
3	ENSMUSG00000027984	Hadh	2.279870973	1.079648715	1.078390199	1.70E-11	5.18E-07
3	ENSMUSG00000030647	Ndufc2	3.726184091	2.111484201	0.819441499	2.40E-11	7.31E-07
3	ENSMUSG00000061477	Rps7	5.51175685	3.295205689	0.742143723	2.55E-11	7.79E-07
3	ENSMUSG00000047675	Rps8	10.08893847	6.814614192	0.566070499	2.95E-11	9.00E-07
3	ENSMUSG00000022110	Sucla2	2.681015568	1.407207012	0.92994502	3.03E-11	9.25E-07
3	ENSMUSG00000090862	Rps13	5.22788653	3.236825848	0.691648082	3.07E-11	9.34E-07
3	ENSMUSG00000028223	Decr1	1.842414971	0.852571063	1.111706044	3.19E-11	9.72E-07
3	ENSMUSG00000002416	Ndufb2	3.347900136	1.928707803	0.795621901	3.20E-11	9.75E-07
3	ENSMUSG00000057863	Rpl36	5.607941524	3.374673061	0.732723566	3.97E-11	1.21E-06
3	ENSMUSG00000017404	Rpl19	7.29801504	4.777787675	0.611161382	4.61E-11	1.40E-06
3	ENSMUSG00000027406	Idh3b	2.568548515	1.286978754	0.996965086	5.10E-11	1.55E-06
3	ENSMUSG00000030744	Rps3	4.232478198	2.49013273	0.765279993	5.77E-11	1.76E-06
3	ENSMUSG00000041453	Rpl21	6.228428098	3.826765324	0.702742678	6.44E-11	1.96E-06
3	ENSMUSG00000024953	Prdx5	3.057116384	1.678726717	0.864804086	6.87E-11	2.09E-06
3	ENSMUSG00000016427	Ndufa1	3.332011661	1.835820175	0.859968701	7.64E-11	2.33E-06
3	ENSMUSG00000021798	Ldb3	1.836166188	0.847051359	1.116175288	8.66E-11	2.64E-06
3	ENSMUSG00000026688	Mgst3	2.371097122	1.248038781	0.925891994	1.08E-10	3.28E-06
3	ENSMUSG00000039001	Rps21	7.007232363	4.415973713	0.666113153	1.37E-10	4.17E-06
3	ENSMUSG00000019505	Ubb	6.015479435	3.866078296	0.63780887	1.48E-10	4.50E-06
3	ENSMUSG00000060002	Chpt1	2.929094395	1.595370504	0.876563177	1.87E-10	5.70E-06
3	ENSMUSG00000030884	Uqcrc2	2.744846297	1.507303158	0.864755755	1.93E-10	5.87E-06
3	ENSMUSG00000020022	Ndufa12	2.87082086	1.539281818	0.899205919	2.02E-10	6.16E-06
3	ENSMUSG00000046330	Rpl37a	4.93631378	2.805544635	0.815153238	2.08E-10	6.34E-06
3	ENSMUSG00000098274	Rpl24	6.659074786	4.052136871	0.716638837	2.29E-10	6.99E-06
3	ENSMUSG00000020460	Rps27a	6.213014103	4.11283652	0.595159601	2.70E-10	8.23E-06
3	ENSMUSG00000023456	Tpi1	2.13026963	1.120519283	0.92686857	3.26E-10	9.93E-06
3	ENSMUSG00000090137	Uba52	2.034178122	0.927084591	1.133673127	3.65E-10	1.11E-05
3	ENSMUSG00000032047	Acat1	2.829018668	1.64109551	0.785642492	3.75E-10	1.14E-05
3	ENSMUSG00000041476	Smpx	1.905321896	1.032472339	0.883931624	4.28E-10	1.30E-05
3	ENSMUSG00000060938	Rpl26	5.220881432	3.07345452	0.764432258	5.71E-10	1.74E-05
3	ENSMUSG00000038274	Fau	6.996484489	4.676823687	0.581101155	6.75E-10	2.06E-05
3	ENSMUSG00000052738	Suclg1	2.372030114	1.341036898	0.822773392	8.02E-10	2.44E-05
3	ENSMUSG00000022450	Ndufa6	4.177550261	2.562816025	0.704927269	8.70E-10	2.65E-05
3	ENSMUSG00000031672	Got2	2.034844758	1.069657187	0.927770229	9.07E-10	2.76E-05
3	ENSMUSG00000054452	Tle5	2.740437621	1.474124284	0.894548132	9.69E-10	2.95E-05
3	ENSMUSG00000044533	Rps2	6.336902574	4.120969702	0.620793979	9.82E-10	2.99E-05
3	ENSMUSG00000061983	Rps12	5.937795164	3.560460723	0.737863388	1.01E-09	3.09E-05
3	ENSMUSG00000004558	Ndrg2	2.937878325	1.524625351	0.946319876	1.13E-09	3.43E-05
3	ENSMUSG00000024048	Myl12a	3.088820795	1.824490531	0.759562508	1.77E-09	5.39E-05
3	ENSMUSG00000041616	Nppa	24.58500264	4.909854639	2.324026292	1.94E-09	5.93E-05
3	ENSMUSG00000030432	Rpl28	5.575707893	3.428040684	0.70177075	2.95E-09	9.00E-05
3	ENSMUSG00000030335	Mrpl51	1.822749167	0.882865049	1.045851206	3.21E-09	9.79E-05
3	ENSMUSG00000024608	Rps14	5.782957686	3.751876201	0.624195321	3.29E-09	0.000100377
3	ENSMUSG00000000399	Ndufa9	1.851970954	0.927425737	0.997757803	5.54E-09	0.000168819
3	ENSMUSG00000020456	Ogdh	3.214267826	1.876262589	0.776628393	5.88E-09	0.000179163
3	ENSMUSG00000005510	Ndufs3	2.169642467	1.141036635	0.927112209	6.37E-09	0.000194304
3	ENSMUSG00000024132	Eci1	1.871304482	1.026537888	0.866257444	7.77E-09	0.000236673
3	ENSMUSG00000029580	Actb	8.515924397	5.255074112	0.696452031	8.66E-09	0.000263905
3	ENSMUSG00000024359	Hspa9	2.371415419	1.324912948	0.839850841	1.04E-08	0.000316303
3	ENSMUSG00000032294	Pkm	2.452691045	1.392762058	0.816416709	1.05E-08	0.000318819
3	ENSMUSG00000026664	Phyh	1.958284031	1.024286376	0.934970901	1.09E-08	0.000333405
3	ENSMUSG00000047215	Rpl9	6.73629037	4.603254735	0.549300047	1.17E-08	0.000356072
3	ENSMUSG00000028936	Rpl22	3.207227775	1.882289636	0.768838178	1.24E-08	0.000378712
3	ENSMUSG00000035242	Oaz1	4.282555068	2.65237063	0.691189413	1.26E-08	0.000385349
3	ENSMUSG00000008348	Ubc	3.853914392	2.242867648	0.780980036	1.32E-08	0.000401371
3	ENSMUSG00000032314	Etfa	3.39445836	2.134503971	0.669280541	1.39E-08	0.000424177
3	ENSMUSG00000028756	Pink1	1.923672971	0.923105517	1.059296087	1.58E-08	0.000481482
3	ENSMUSG00000040713	Creg1	1.985524287	1.096637296	0.856433563	1.84E-08	0.000559859
3	ENSMUSG00000036570	Fxyd1	4.12262031	2.63437788	0.646099293	1.94E-08	0.000592362
3	ENSMUSG00000063316	Rpl27	3.616629657	2.181788551	0.729134584	2.50E-08	0.000762931
3	ENSMUSG00000049760	Micos13	2.023891498	1.038233949	0.96300038	3.49E-08	0.001064332
3	ENSMUSG00000057841	Rpl32	4.910245353	2.859115694	0.780226114	3.83E-08	0.001167387
3	ENSMUSG00000024248	Cox7a2l	2.071139585	1.117631998	0.889979557	4.26E-08	0.001297715
3	ENSMUSG00000067274	Rplp0	4.665914647	2.854432888	0.708955774	4.48E-08	0.001366753
3	ENSMUSG00000007891	Ctsd	3.78183099	2.160309252	0.807847039	4.80E-08	0.001462124
3	ENSMUSG00000046364	Rpl27a	6.330733511	4.07843808	0.634355919	5.76E-08	0.001756351
3	ENSMUSG00000062647	Rpl7a	3.382219366	1.982354491	0.770755261	5.81E-08	0.001771323
3	ENSMUSG00000032518	Rpsa	6.464023076	4.114875687	0.651583502	6.43E-08	0.001959899
3	ENSMUSG00000041841	Rpl37	5.386306458	3.393028136	0.666722922	7.45E-08	0.002270194
3	ENSMUSG00000058076	Sdhc	2.019494168	1.096390909	0.881231709	1.42E-07	0.004319069
3	ENSMUSG00000021577	Sdha	3.169926105	1.993841361	0.668898583	1.44E-07	0.004379884
3	ENSMUSG00000059070	Rpl18	5.714000741	3.781842856	0.595411806	1.51E-07	0.004608823
3	ENSMUSG00000031987	Egln1	1.825930879	0.87859085	1.055368774	1.57E-07	0.004788121
3	ENSMUSG00000035202	Lars2	4.261089193	2.76780226	0.622481374	1.85E-07	0.005650813
3	ENSMUSG00000062981	Mrpl42	2.334702317	1.416709035	0.720695127	2.67E-07	0.008136648
3	ENSMUSG00000005683	Cs	1.855971529	0.995517052	0.898656646	2.88E-07	0.00877877
3	ENSMUSG00000043716	Rpl7	4.294811315	2.714005733	0.662170982	3.17E-07	0.009654574
3	ENSMUSG00000060143	Gm10076	2.255982799	1.142801748	0.981180919	3.76E-07	0.011473909
3	ENSMUSG00000031320	Rps4x	5.52455167	3.640907053	0.60155948	4.00E-07	0.012197879
3	ENSMUSG00000020483	Dynll2	2.000169543	1.014398649	0.979497565	4.21E-07	0.012827611
3	ENSMUSG00000045128	Rpl18a	5.738555743	3.701779979	0.632468542	4.44E-07	0.013531918
3	ENSMUSG00000003380	Rabac1	4.753852143	3.233831389	0.555852573	4.66E-07	0.014210438
3	ENSMUSG00000047843	Bri3	2.77674929	1.772776612	0.64738617	6.39E-07	0.019481906
3	ENSMUSG00000028234	Rps20	5.70015753	3.706008532	0.621135587	7.28E-07	0.022180988
3	ENSMUSG00000059291	Rpl11	5.54777159	3.616860123	0.617170586	7.91E-07	0.024120999
3	ENSMUSG00000061787	Rps17	3.767893737	2.2714443	0.73014835	8.62E-07	0.026286345
3	ENSMUSG00000057322	Rpl38	4.320301827	2.656991056	0.701338735	8.76E-07	0.026698453
3	ENSMUSG00000022565	Plec	2.24154933	1.236388458	0.858364158	9.07E-07	0.027647354
3	ENSMUSG00000028495	Rps6	3.052780678	1.721113083	0.826782055	9.86E-07	0.030053772
3	ENSMUSG00000093674	Rpl41	4.815535923	2.888575828	0.737337998	1.01E-06	0.030886271
3	ENSMUSG00000008892	Vdac3	1.719579577	1.052796713	0.707828991	1.05E-06	0.032102395
3	ENSMUSG00000058558	Rpl5	4.165107029	2.563271321	0.700367373	1.39E-06	0.042323625
3	ENSMUSG00000027523	Gnas	6.909521312	4.982382855	0.47174988	1.41E-06	0.043073649
3	ENSMUSG00000093904	Tomm20	1.771367129	0.992390387	0.835883587	1.65E-06	0.05029423
3	ENSMUSG00000008683	Rps15a	4.191766633	2.782267445	0.591297295	1.94E-06	0.059059958
3	ENSMUSG00000009927	Rps25	3.420297334	1.981031015	0.78787028	2.22E-06	0.067600478
3	ENSMUSG00000063229	Ldha	1.745942968	0.954309775	0.871476878	3.14E-06	0.095796161
3	ENSMUSG00000049517	Rps23	5.394482257	3.522299269	0.61496701	3.35E-06	0.102247161
3	ENSMUSG00000028964	Park7	2.093772339	1.15874561	0.85354071	3.45E-06	0.105082929
3	ENSMUSG00000074884	Serf2	4.300427325	2.890984069	0.572919366	4.09E-06	0.124808527
3	ENSMUSG00000055839	Elob	2.760958029	1.713512915	0.688211891	4.67E-06	0.142441232
3	ENSMUSG00000026385	Dbi	2.759095665	1.589192377	0.795901702	4.71E-06	0.143423124
3	ENSMUSG00000040952	Rps19	4.048345769	2.703368489	0.582574341	4.85E-06	0.147705424
3	ENSMUSG00000025980	Hspd1	2.523565116	1.586972168	0.669186487	4.99E-06	0.152140638
3	ENSMUSG00000022820	Ndufb4	3.078973329	1.896810031	0.698874173	5.69E-06	0.173525911
3	ENSMUSG00000005873	Reep5	3.340969978	2.067489096	0.692387298	5.72E-06	0.174253241
3	ENSMUSG00000062328	Rpl17	4.437726225	2.801308939	0.663719569	6.11E-06	0.186150692
3	ENSMUSG00000067288	Rps28	3.590228543	2.2783787	0.65606812	6.64E-06	0.202332729
3	ENSMUSG00000037563	Rps16	5.215452005	3.528699574	0.563655684	7.77E-06	0.236846055
3	ENSMUSG00000008682	Rpl10	5.325532975	3.53109862	0.592808802	8.33E-06	0.253871394
3	ENSMUSG00000005161	Prdx2	2.208023929	1.342343346	0.718002074	1.12E-05	0.341895885
3	ENSMUSG00000062997	Rpl35	2.530751289	1.45843739	0.79514228	1.17E-05	0.358118788
3	ENSMUSG00000020949	Fkbp3	2.069884758	1.230851721	0.749893474	1.42E-05	0.432085124
3	ENSMUSG00000042541	Sem1	2.704703275	1.73493126	0.640591826	1.84E-05	0.560246661
3	ENSMUSG00000032399	Rpl4	2.370739256	1.375923032	0.784937229	2.47E-05	0.752187448
3	ENSMUSG00000038615	Nfe2l1	2.973411011	1.882858695	0.659194167	3.21E-05	0.978990568
3	ENSMUSG00000063457	Rps15	4.672319467	2.957871252	0.659579664	4.42E-05	1
3	ENSMUSG00000071014	Ndufb6	2.174765307	1.328107692	0.711487584	4.65E-05	1
3	ENSMUSG00000025794	Rpl14	2.910102773	1.952278679	0.575911098	7.65E-05	1
3	ENSMUSG00000034994	Eef2	3.327926962	1.991923025	0.740461873	8.61E-05	1
3	ENSMUSG00000031532	Saraf	2.036135449	1.170575819	0.798615154	9.60E-05	1
3	ENSMUSG00000001289	Pfdn5	2.466379135	1.388257582	0.829119315	0.000121004	1
3	ENSMUSG00000113902	Ndufb1-ps	3.411371456	2.262770095	0.592261846	0.000125444	1
3	ENSMUSG00000037742	Eef1a1	6.183139827	4.367104088	0.501662714	0.000136575	1
3	ENSMUSG00000028603	Scp2	1.950939186	1.12561034	0.793461321	0.000137167	1
3	ENSMUSG00000028639	Ybx1	2.76898828	1.684339722	0.717175797	0.000174742	1
3	ENSMUSG00000023150	Ivns1abp	2.387421448	1.43311354	0.736300353	0.000235581	1
3	ENSMUSG00000055762	Eef1d	1.824709556	1.118818336	0.705691042	0.000267139	1
3	ENSMUSG00000058546	Rpl23a	3.547307922	2.305236335	0.621809903	0.000291284	1
3	ENSMUSG00000060743	H3f3a	3.099295584	1.996041282	0.634798795	0.000303885	1
3	ENSMUSG00000050608	Micos10	2.455033082	1.643510247	0.578962014	0.000435293	1
3	ENSMUSG00000029432	Nipsnap2	2.431264775	1.519543035	0.678069484	0.000471251	1
3	ENSMUSG00000020469	Myl7	2.549681095	1.477513919	0.78714509	0.00051612	1
3	ENSMUSG00000062006	Rpl34	4.133911936	2.82645209	0.548515413	0.000651471	1
3	ENSMUSG00000031447	Lamp1	5.627579755	3.962886812	0.505962836	0.00067141	1
3	ENSMUSG00000052146	Rps10	2.713545296	1.742019461	0.63941825	0.000759667	1
3	ENSMUSG00000090733	Rps27	4.055759553	2.597164104	0.643034949	0.000848731	1
3	ENSMUSG00000025362	Rps26	3.657148525	2.470241704	0.566067008	0.000870287	1
3	ENSMUSG00000021764	Ndufs4	2.926938902	2.086187803	0.488523593	0.000899472	1
3	ENSMUSG00000061086	Myl4	2.680896706	1.658148548	0.693142375	0.000965568	1
3	ENSMUSG00000020267	Hint1	2.442608801	1.615008832	0.596880771	0.001019773	1
3	ENSMUSG00000021843	Ktn1	4.109790964	2.807504475	0.549776694	0.001278313	1
3	ENSMUSG00000027288	Zfp106	2.897409665	1.679642154	0.786609781	0.001383325	1
3	ENSMUSG00000079435	Rpl36a	2.010214899	1.251163012	0.684079971	0.001503457	1
3	ENSMUSG00000038708	Golga4	2.720449724	1.582061902	0.782039117	0.001705286	1
3	ENSMUSG00000031812	Map1lc3b	2.191710768	1.451895678	0.594119628	0.001760045	1
3	ENSMUSG00000022452	Smdt1	2.033492631	1.251310839	0.700519548	0.001876677	1
3	ENSMUSG00000073702	Rpl31	1.952528462	1.205538877	0.695665402	0.002055907	1
3	ENSMUSG00000054428	Atpif1	2.425671393	1.539745966	0.655691772	0.002315492	1
3	ENSMUSG00000025967	Eef1b2	2.273094746	1.442221812	0.656364753	0.002884522	1
3	ENSMUSG00000038900	Rpl12	3.043306831	2.000579471	0.605221857	0.003244497	1
3	ENSMUSG00000031996	Aplp2	4.682352531	3.371327589	0.473916739	0.00377603	1
3	ENSMUSG00000045103	Dmd	2.649187023	1.490056654	0.830182512	0.00440201	1
3	ENSMUSG00000050708	Ftl1	8.217808802	5.623084115	0.547392137	0.008097471	1
3	ENSMUSG00000031765	Mt1	1.963791009	1.252408418	0.648936292	0.008995976	1
3	ENSMUSG00000028691	Prdx1	2.385014971	1.637055484	0.542895103	0.009854518	1
4	ENSMUSG00000052372	Il1rapl1	7.264032647	0.422417651	4.104028662	7.02E-180	2.14E-175
4	ENSMUSG00000055761	Nkain3	3.098953975	0.222054271	3.802797103	4.75E-123	1.45E-118
4	ENSMUSG00000042581	Thsd7b	2.148141251	0.15967611	3.749868477	5.30E-103	1.62E-98
4	ENSMUSG00000066113	Adamtsl1	2.783655602	0.216598403	3.683886219	2.00E-97	6.10E-93
4	ENSMUSG00000026109	Tmeff2	2.710540932	0.169260737	4.001261534	2.21E-96	6.74E-92
4	ENSMUSG00000025909	Sntg1	13.76351228	1.10084977	3.644159168	9.58E-84	2.92E-79
4	ENSMUSG00000064294	Aox3	2.419842128	0.36367788	2.734179844	2.18E-62	6.64E-58
4	ENSMUSG00000069670	Nkain2	19.24037881	3.296873667	2.544966693	1.95E-54	5.95E-50
4	ENSMUSG00000056427	Slit3	20.38977774	6.688760656	1.608035222	2.04E-49	6.21E-45
4	ENSMUSG00000032006	Pdgfd	3.015721548	0.734769229	2.037140111	4.44E-47	1.35E-42
4	ENSMUSG00000046318	Ccbe1	8.931554399	2.284675617	1.966921933	2.40E-44	7.31E-40
4	ENSMUSG00000038119	Cdon	4.542661002	1.066412617	2.090771893	2.15E-41	6.56E-37
4	ENSMUSG00000045658	Pid1	15.32725881	5.567455662	1.461009634	3.57E-41	1.09E-36
4	ENSMUSG00000055653	Gpc3	2.286659512	0.391657378	2.545577522	4.85E-40	1.48E-35
4	ENSMUSG00000031380	Vegfd	1.967071369	0.351153697	2.485874775	6.55E-37	2.00E-32
4	ENSMUSG00000038463	Olfml2b	1.721807403	0.440218446	1.967632272	3.68E-36	1.12E-31
4	ENSMUSG00000060961	Slc4a4	3.88774178	0.955412463	2.024736798	2.54E-35	7.73E-31
4	ENSMUSG00000024899	Papss2	4.392790824	1.085036868	2.017393739	4.91E-33	1.50E-28
4	ENSMUSG00000022371	Col14a1	5.32126277	1.728108868	1.622574539	6.20E-32	1.89E-27
4	ENSMUSG00000006369	Fbln1	12.61339844	5.898384662	1.096565219	1.65E-31	5.03E-27
4	ENSMUSG00000024076	Vit	3.922789174	1.301359616	1.591860111	3.80E-30	1.16E-25
4	ENSMUSG00000035948	Acss3	3.411381143	1.10587015	1.625173956	1.77E-28	5.41E-24
4	ENSMUSG00000024998	Plce1	4.760531395	1.810831139	1.394470603	1.73E-27	5.28E-23
4	ENSMUSG00000020053	Igf1	8.031964209	2.898280709	1.470555509	5.88E-27	1.79E-22
4	ENSMUSG00000048387	Osr1	1.43014806	0.377981263	1.919777889	1.95E-25	5.96E-21
4	ENSMUSG00000029563	Foxp2	11.32404637	5.853288704	0.952070218	2.71E-21	8.26E-17
4	ENSMUSG00000038388	Mpp6	2.316083206	0.642063899	1.850898294	3.36E-21	1.02E-16
4	ENSMUSG00000031636	Pdlim3	2.366168061	1.006729108	1.232877014	1.29E-19	3.95E-15
4	ENSMUSG00000006800	Sulf2	3.411011395	1.446374269	1.237758657	5.70E-19	1.74E-14
4	ENSMUSG00000028565	Nfia	22.04089327	13.92742026	0.662254639	8.68E-19	2.65E-14
4	ENSMUSG00000032827	Ppp1r9a	2.577291862	0.865856257	1.573656478	9.99E-18	3.04E-13
4	ENSMUSG00000042436	Mfap4	2.979185923	1.142622016	1.382569928	1.02E-17	3.11E-13
4	ENSMUSG00000003477	Inmt	1.824970886	0.653048263	1.482611927	2.48E-17	7.57E-13
4	ENSMUSG00000052534	Pbx1	8.062053603	4.536148901	0.829679377	3.97E-16	1.21E-11
4	ENSMUSG00000033965	Slc16a2	4.401552592	2.104335868	1.064647518	4.54E-16	1.38E-11
4	ENSMUSG00000003452	Bicd1	1.731427799	0.674621526	1.35981197	8.57E-16	2.61E-11
4	ENSMUSG00000039683	Sdk1	3.613742853	1.451652861	1.315797353	1.77E-15	5.39E-11
4	ENSMUSG00000054728	Phactr1	2.735786833	1.251222447	1.128617522	2.00E-15	6.10E-11
4	ENSMUSG00000029673	Auts2	10.86674065	6.441999526	0.754338826	2.58E-15	7.87E-11
4	ENSMUSG00000047907	Tshz2	7.645424965	3.20413989	1.254659559	5.79E-15	1.76E-10
4	ENSMUSG00000036158	Prickle1	4.201765899	1.661586849	1.338434082	6.04E-15	1.84E-10
4	ENSMUSG00000073418	C4b	2.603533165	0.78437532	1.730854736	1.03E-14	3.14E-10
4	ENSMUSG00000052726	Kcnt2	17.10270646	10.52682166	0.700154734	1.28E-14	3.91E-10
4	ENSMUSG00000027210	Meis2	5.724371408	2.877555776	0.992273387	2.57E-14	7.84E-10
4	ENSMUSG00000028780	Sema3c	2.664611744	1.066222342	1.321417017	4.92E-14	1.50E-09
4	ENSMUSG00000028517	Plpp3	10.14828569	5.277269011	0.943372607	5.80E-14	1.77E-09
4	ENSMUSG00000024164	C3	23.44614083	14.11499783	0.732121572	8.91E-14	2.71E-09
4	ENSMUSG00000035299	Mid1	8.573135062	4.402323036	0.96155786	9.11E-14	2.78E-09
4	ENSMUSG00000022708	Zbtb20	40.26406517	31.28659417	0.363948221	1.52E-13	4.64E-09
4	ENSMUSG00000002107	Celf2	39.43854523	28.70876802	0.458114914	5.46E-13	1.66E-08
4	ENSMUSG00000024043	Arhgap28	1.868394132	0.856903228	1.124594627	8.56E-13	2.61E-08
4	ENSMUSG00000024548	Setbp1	6.481770463	3.424294553	0.920581126	9.09E-13	2.77E-08
4	ENSMUSG00000040003	Magi2	10.93744131	6.846703898	0.67579375	3.25E-12	9.90E-08
4	ENSMUSG00000028413	B4galt1	4.369663316	2.287178013	0.933953467	5.87E-12	1.79E-07
4	ENSMUSG00000028487	Bnc2	3.702812088	1.602487242	1.208308465	6.32E-12	1.93E-07
4	ENSMUSG00000044017	Adgrd1	3.813052061	2.077041598	0.876416119	1.17E-11	3.55E-07
4	ENSMUSG00000031451	Gas6	4.183926808	2.056250525	1.024841567	1.85E-11	5.64E-07
4	ENSMUSG00000021699	Pde4d	3.924887225	1.827119237	1.103080415	4.79E-11	1.46E-06
4	ENSMUSG00000030306	Tmtc1	4.055348755	2.141912423	0.920926496	4.83E-11	1.47E-06
4	ENSMUSG00000020044	Timp3	7.888670392	4.416146678	0.836994069	6.63E-11	2.02E-06
4	ENSMUSG00000002688	Prkd1	2.132761677	0.962906964	1.147254446	6.94E-11	2.11E-06
4	ENSMUSG00000047712	Ust	4.268710061	2.468362409	0.790245946	1.03E-10	3.14E-06
4	ENSMUSG00000029675	Eln	9.456922542	4.68695267	1.012720554	1.58E-10	4.82E-06
4	ENSMUSG00000031925	Maml2	9.16765774	6.180738087	0.568774053	1.63E-10	4.97E-06
4	ENSMUSG00000024085	Man2a1	8.466772405	4.70039542	0.84902998	2.13E-10	6.49E-06
4	ENSMUSG00000073557	Ppp1r12b	3.203634437	1.865826941	0.779894353	2.73E-10	8.33E-06
4	ENSMUSG00000020023	Tmcc3	3.487912083	1.420720765	1.295740647	3.20E-10	9.74E-06
4	ENSMUSG00000034780	B3galt1	6.80354658	4.124184311	0.722178188	3.35E-10	1.02E-05
4	ENSMUSG00000025026	Add3	4.394626376	2.366093166	0.893233633	3.61E-10	1.10E-05
4	ENSMUSG00000033420	Antxr1	4.270435459	2.602258207	0.714619071	3.68E-10	1.12E-05
4	ENSMUSG00000039607	Rbms3	16.49998046	11.81584288	0.481741768	3.81E-10	1.16E-05
4	ENSMUSG00000048490	Nrip1	3.894628579	2.22980743	0.804566626	6.42E-10	1.96E-05
4	ENSMUSG00000022309	Angpt1	6.447348072	3.569577113	0.852952704	6.80E-10	2.07E-05
4	ENSMUSG00000002985	Apoe	33.00986441	24.27704313	0.443304496	9.37E-10	2.86E-05
4	ENSMUSG00000040170	Fmo2	4.258975153	2.03211071	1.06752731	1.36E-09	4.15E-05
4	ENSMUSG00000052062	Pard3b	8.67652052	6.02013292	0.527321264	1.60E-09	4.87E-05
4	ENSMUSG00000022032	Scara5	7.550079054	4.464240396	0.758077033	1.70E-09	5.19E-05
4	ENSMUSG00000030067	Foxp1	3.079524831	1.727898308	0.833689448	1.71E-09	5.22E-05
4	ENSMUSG00000066687	Zbtb16	4.375700253	2.682613863	0.705874506	2.20E-09	6.71E-05
4	ENSMUSG00000048915	Efna5	3.584762237	2.145231845	0.740743859	2.58E-09	7.88E-05
4	ENSMUSG00000047497	Adamts12	4.709524062	2.610328602	0.851349838	4.43E-09	0.000134885
4	ENSMUSG00000028369	Svep1	7.06865928	3.232278996	1.128884873	6.79E-09	0.000207023
4	ENSMUSG00000019944	Rhobtb1	1.402111727	0.679845589	1.044322301	7.09E-09	0.000216171
4	ENSMUSG00000018334	Ksr1	2.804413245	1.569428059	0.837460055	7.54E-09	0.000229956
4	ENSMUSG00000017493	Igfbp4	7.561938223	4.87092155	0.634561316	9.57E-09	0.000291555
4	ENSMUSG00000008575	Nfib	10.4427935	7.895248736	0.403451068	1.12E-08	0.000341284
4	ENSMUSG00000031343	Gabra3	1.793952263	0.862423161	1.056673673	1.57E-08	0.000479305
4	ENSMUSG00000024713	Pcsk5	1.953005393	0.966206679	1.015292203	1.68E-08	0.000513223
4	ENSMUSG00000021559	Dapk1	3.806599578	2.531233771	0.588662065	2.10E-08	0.000640881
4	ENSMUSG00000046876	Atxn1	4.806606566	2.703269936	0.83031314	3.65E-08	0.001113236
4	ENSMUSG00000073489	Ifi204	1.534823481	0.778388058	0.979511259	3.88E-08	0.001183048
4	ENSMUSG00000006586	Runx1t1	2.872425978	1.776137196	0.693526689	4.04E-08	0.001230256
4	ENSMUSG00000057315	Arhgap24	17.2787594	11.8628053	0.542554421	6.12E-08	0.001865
4	ENSMUSG00000024236	Svil	5.490552437	3.405135079	0.689239285	7.13E-08	0.00217193
4	ENSMUSG00000026365	Cfh	27.14998366	20.18100593	0.427953242	7.43E-08	0.002264522
4	ENSMUSG00000111462	Gm49317	10.15651319	7.680869341	0.403063685	9.21E-08	0.002807147
4	ENSMUSG00000022053	Ebf2	11.11616406	7.084340926	0.649953486	1.06E-07	0.003244174
4	ENSMUSG00000021779	Thrb	2.224146516	1.246327752	0.835568319	1.19E-07	0.003639595
4	ENSMUSG00000093472	4930438E09Rik	2.663267168	1.443381668	0.883744324	1.57E-07	0.004787036
4	ENSMUSG00000033308	Dpyd	2.918166484	1.938021266	0.590477791	1.93E-07	0.005887383
4	ENSMUSG00000024535	Snx24	2.323508508	1.289643116	0.849333045	2.59E-07	0.007882103
4	ENSMUSG00000020176	Grb10	4.117405593	2.067858764	0.993597919	3.37E-07	0.010262437
4	ENSMUSG00000024238	Zeb1	18.09643266	12.75702821	0.504413039	3.40E-07	0.010360492
4	ENSMUSG00000014329	Bicc1	18.18885311	12.3508786	0.558440904	5.18E-07	0.015781072
4	ENSMUSG00000030074	Gxylt2	2.486964233	1.569621818	0.663968758	6.12E-07	0.018649029
4	ENSMUSG00000061080	Lsamp	11.43859105	7.468869906	0.614947485	7.14E-07	0.02177349
4	ENSMUSG00000040037	Negr1	10.13616039	6.329683369	0.679306021	7.25E-07	0.022084519
4	ENSMUSG00000026872	Zeb2	9.141188454	6.909894219	0.403718119	8.15E-07	0.02482873
4	ENSMUSG00000031523	Dlc1	18.614437	14.2968432	0.380725353	8.62E-07	0.026269777
4	ENSMUSG00000071757	Zhx2	2.098962962	1.17238984	0.840224338	1.05E-06	0.032071586
4	ENSMUSG00000038910	Plcl2	1.988459944	1.00139354	0.989642446	1.20E-06	0.036714538
4	ENSMUSG00000058318	Phf21a	4.576960306	3.155387227	0.536572718	1.51E-06	0.046149465
4	ENSMUSG00000019889	Ptprk	2.017272997	1.218059226	0.727822054	1.76E-06	0.053748735
4	ENSMUSG00000063458	Lrmda	3.124786662	1.730355845	0.85268894	1.89E-06	0.057701161
4	ENSMUSG00000056220	Pla2g4a	2.234234965	1.092422349	1.032250181	2.24E-06	0.068206959
4	ENSMUSG00000039852	Rere	4.04022085	2.800626879	0.528684367	2.77E-06	0.084384986
4	ENSMUSG00000038332	Sesn1	1.827880412	0.99233273	0.881275843	3.09E-06	0.094302185
4	ENSMUSG00000028496	Mllt3	2.243991491	1.237855385	0.858224427	4.60E-06	0.140135566
4	ENSMUSG00000053007	Creb5	4.472438324	2.594271874	0.785731908	4.83E-06	0.147168788
4	ENSMUSG00000073889	Il11ra1	2.049038647	1.363995719	0.587108079	5.87E-06	0.178980046
4	ENSMUSG00000038521	C1s1	4.158390042	2.769925196	0.586178068	7.00E-06	0.213342299
4	ENSMUSG00000092329	Galnt2l	9.065080102	6.839349529	0.406460647	8.48E-06	0.258396183
4	ENSMUSG00000026721	Rabgap1l	3.72192863	2.563737435	0.537801875	8.65E-06	0.263564007
4	ENSMUSG00000021895	Arhgef3	2.476360551	1.520091522	0.704063193	8.90E-06	0.271271008
4	ENSMUSG00000075254	Heg1	10.69136379	7.353585937	0.539926046	9.98E-06	0.304089428
4	ENSMUSG00000058317	Ube2e2	5.904662659	4.214563918	0.486471276	1.16E-05	0.353295337
4	ENSMUSG00000052572	Dlg2	3.558011813	2.042495081	0.800738697	1.18E-05	0.359908465
4	ENSMUSG00000026586	Prrx1	2.479130099	1.529907306	0.696389738	1.25E-05	0.380430837
4	ENSMUSG00000059602	Syn3	1.705852277	0.959134115	0.830688252	1.42E-05	0.431613208
4	ENSMUSG00000020122	Egfr	8.698034802	6.387015587	0.44554751	1.43E-05	0.434859586
4	ENSMUSG00000086370	Ftx	1.453219606	0.864717783	0.748951471	1.44E-05	0.439404476
4	ENSMUSG00000024975	Pdcd4	1.588544613	0.817926302	0.957662846	1.78E-05	0.542176453
4	ENSMUSG00000020902	Ntn1	2.411608126	1.37456124	0.811024312	2.12E-05	0.645750798
4	ENSMUSG00000052331	Ankrd44	1.996872669	1.170156965	0.771040275	2.16E-05	0.657871767
4	ENSMUSG00000054640	Slc8a1	8.016168573	5.002243212	0.680337644	2.16E-05	0.659484804
4	ENSMUSG00000031558	Slit2	4.859820309	2.96474562	0.712994647	2.41E-05	0.733627122
4	ENSMUSG00000029287	Tgfbr3	6.203550245	4.749504652	0.385317039	2.56E-05	0.780806722
4	ENSMUSG00000020774	Aspa	2.195240107	1.287971643	0.769277915	2.79E-05	0.849073761
4	ENSMUSG00000028600	Podn	1.389387014	0.814051469	0.7712566	3.13E-05	0.954980431
4	ENSMUSG00000031563	Wwc2	2.485666582	1.554867527	0.676841122	3.20E-05	0.976615631
4	ENSMUSG00000058835	Abi1	3.589612971	2.665192792	0.429588405	3.44E-05	1
4	ENSMUSG00000020354	Sgcd	20.04186716	13.38692513	0.582192298	3.53E-05	1
4	ENSMUSG00000020467	Efemp1	3.406359661	2.410059526	0.49916199	4.19E-05	1
4	ENSMUSG00000046532	Ar	5.780066104	4.097414426	0.496372173	4.53E-05	1
4	ENSMUSG00000022306	Zfpm2	12.30504859	9.48067901	0.37618806	5.25E-05	1
4	ENSMUSG00000030849	Fgfr2	4.533773674	3.385796884	0.421216946	5.70E-05	1
4	ENSMUSG00000072294	Klf12	3.06053259	2.030825563	0.591716406	5.83E-05	1
4	ENSMUSG00000027684	Mecom	11.28478187	8.777954098	0.362421901	6.55E-05	1
4	ENSMUSG00000034801	Sos2	1.873761521	1.414632052	0.405510494	7.09E-05	1
4	ENSMUSG00000024897	Apba1	2.379923832	1.449384647	0.715474884	7.55E-05	1
4	ENSMUSG00000005514	Por	1.693427194	1.090668175	0.634733719	8.63E-05	1
4	ENSMUSG00000038481	Cdk19	1.522364693	0.972129157	0.6470941	9.21E-05	1
4	ENSMUSG00000030987	Stim1	2.381717477	1.582118355	0.59014476	9.95E-05	1
4	ENSMUSG00000048264	Dip2c	4.369980567	2.999177766	0.543059829	0.000101906	1
4	ENSMUSG00000022637	Cblb	3.012450672	2.226082027	0.436430864	0.000103849	1
4	ENSMUSG00000101609	Kcnq1ot1	4.867682938	3.35325452	0.537673208	0.000103905	1
4	ENSMUSG00000021767	Kat6b	2.063761038	1.349514642	0.612835301	0.000126792	1
4	ENSMUSG00000035357	Pdzrn3	2.164885745	1.523795006	0.506622054	0.000132288	1
4	ENSMUSG00000071856	Mcc	3.280810731	2.152548326	0.608006741	0.000142765	1
4	ENSMUSG00000102758	Naaladl2	8.871405895	6.061175242	0.549565199	0.000145582	1
4	ENSMUSG00000031274	Col4a5	3.044352274	1.925436595	0.660949693	0.000150343	1
4	ENSMUSG00000111593	Gm48742	2.402984189	1.4502825	0.728493207	0.000151039	1
4	ENSMUSG00000079105	C7	4.901578328	2.942316717	0.736293828	0.000153952	1
4	ENSMUSG00000005371	Fbxo11	2.326656566	1.579741754	0.558569537	0.000166364	1
4	ENSMUSG00000041112	Elmo1	4.596212268	3.518004782	0.385687984	0.000170824	1
4	ENSMUSG00000039457	Ppl	1.258395602	0.825998387	0.607374664	0.000187667	1
4	ENSMUSG00000024544	Ldlrad4	5.796901036	4.473940627	0.373735745	0.000194288	1
4	ENSMUSG00000039115	Itga9	1.750720323	1.227604864	0.512102365	0.000198826	1
4	ENSMUSG00000024242	Map4k3	1.520599669	1.012107976	0.587277171	0.000210087	1
4	ENSMUSG00000037533	Rapgef6	2.123377005	1.503924466	0.497628434	0.000236407	1
4	ENSMUSG00000036402	Gng12	1.307201001	0.847161224	0.625772533	0.000254097	1
4	ENSMUSG00000019947	Arid5b	1.550047442	1.050770729	0.560864455	0.000281075	1
4	ENSMUSG00000004637	Wwox	4.502965991	2.984237863	0.593513049	0.000291678	1
4	ENSMUSG00000043719	Col6a6	4.248841473	3.067264765	0.470116812	0.000294457	1
4	ENSMUSG00000035992	Fnip1	2.263635167	1.454697006	0.637922766	0.000312702	1
4	ENSMUSG00000000708	Kat2b	2.635302286	1.886582681	0.482193129	0.000316476	1
4	ENSMUSG00000025085	Ablim1	3.95384304	2.685843577	0.557880315	0.000340208	1
4	ENSMUSG00000020220	Vps13d	1.568941021	1.182116231	0.408419226	0.000357041	1
4	ENSMUSG00000026483	Fam129a	2.004197009	1.396681857	0.521020896	0.000383112	1
4	ENSMUSG00000026074	Map4k4	3.302744045	2.349567514	0.491269945	0.000387908	1
4	ENSMUSG00000039428	Tmem135	1.535023648	0.992143155	0.629640676	0.000411677	1
4	ENSMUSG00000025041	Nt5c2	1.548172061	1.056104924	0.551812646	0.000421992	1
4	ENSMUSG00000024222	Fkbp5	3.509607157	2.529960851	0.472194493	0.0004512	1
4	ENSMUSG00000007817	Zmiz1	2.121593957	1.500950237	0.499272425	0.000510138	1
4	ENSMUSG00000038014	Fam120a	1.312555551	0.911619086	0.525875448	0.000522441	1
4	ENSMUSG00000055932	Fto	2.747811529	1.95129476	0.493851328	0.000528112	1
4	ENSMUSG00000024011	Pi16	9.667384699	6.465314703	0.580405057	0.000555015	1
4	ENSMUSG00000017897	Eya2	1.981178437	1.257269816	0.656064533	0.000575145	1
4	ENSMUSG00000027030	Stk39	1.565326114	1.063495468	0.557649369	0.000586175	1
4	ENSMUSG00000007613	Tgfbr1	2.832168465	1.715284104	0.723459532	0.000621805	1
4	ENSMUSG00000044252	Osbpl1a	1.352002558	1.000933872	0.433751218	0.000644862	1
4	ENSMUSG00000005973	Rcn1	1.42518135	0.953602347	0.579685818	0.000723259	1
4	ENSMUSG00000033444	Specc1l	1.717407224	1.231361639	0.479977636	0.000777081	1
4	ENSMUSG00000031548	Sfrp1	3.549607497	2.434427015	0.544077257	0.0008117	1
4	ENSMUSG00000020728	Cep112	2.89811906	1.926180391	0.589374044	0.000839893	1
4	ENSMUSG00000052942	Glis3	1.97954685	1.345302098	0.557240035	0.000853517	1
4	ENSMUSG00000051331	Cacna1c	2.202201071	1.54908395	0.507530869	0.000858874	1
4	ENSMUSG00000023021	Cers5	1.21161572	0.859097762	0.496037982	0.000935138	1
4	ENSMUSG00000025283	Sat1	1.897711086	1.365049181	0.475307437	0.00101489	1
4	ENSMUSG00000063450	Syne2	2.709921124	1.97849148	0.453850007	0.001080122	1
4	ENSMUSG00000041444	Arhgap32	2.394826293	1.526842243	0.649370008	0.001121809	1
4	ENSMUSG00000037138	Aff3	2.0399434	1.40875193	0.534111538	0.001145407	1
4	ENSMUSG00000020160	Meis1	3.134719058	2.151665832	0.542882115	0.001178614	1
4	ENSMUSG00000008540	Mgst1	3.84627526	2.946427868	0.384495065	0.001453546	1
4	ENSMUSG00000003746	Man1a	6.116435496	4.747312628	0.365580072	0.001471998	1
4	ENSMUSG00000021268	Meg3	4.760866847	3.452428253	0.463612847	0.001502321	1
4	ENSMUSG00000021327	Zkscan3	1.725018411	1.159809467	0.57272394	0.00163173	1
4	ENSMUSG00000001424	Snd1	1.891401537	1.43883309	0.39455643	0.001922552	1
4	ENSMUSG00000075284	Wipf1	3.065546095	2.250581435	0.44584633	0.002013096	1
4	ENSMUSG00000019841	Rev3l	2.356168302	1.803943169	0.385288706	0.002094032	1
4	ENSMUSG00000022141	Nipbl	4.545240206	3.476035306	0.386913804	0.002192261	1
4	ENSMUSG00000033713	Foxn3	3.021488958	2.332555567	0.37334822	0.002197329	1
4	ENSMUSG00000053641	Dennd4a	1.701081399	1.204094197	0.498503918	0.002209526	1
4	ENSMUSG00000031355	Arhgap6	7.541426685	5.670544286	0.411350259	0.002434587	1
4	ENSMUSG00000035954	Dock4	2.284731725	1.428441528	0.677582791	0.002502471	1
4	ENSMUSG00000059586	Nsmce2	2.024742119	1.411471256	0.520538422	0.002550878	1
4	ENSMUSG00000033705	Stard9	1.604473058	1.135311488	0.49901139	0.002551855	1
4	ENSMUSG00000022329	Stk3	2.512899238	1.889128579	0.411631925	0.002675529	1
4	ENSMUSG00000026389	Steap3	2.515214966	1.769729763	0.507152629	0.003148548	1
4	ENSMUSG00000040451	Sgms1	1.899699435	1.380231176	0.460861251	0.003182624	1
4	ENSMUSG00000035305	Ror1	4.576422528	3.487660298	0.391960731	0.003260338	1
4	ENSMUSG00000001768	Rin2	1.940766806	1.484393827	0.386752874	0.003444453	1
4	ENSMUSG00000028249	Sdcbp	1.574723965	1.119227904	0.492595123	0.003479984	1
4	ENSMUSG00000025104	Hdgfl3	1.496758174	1.043519077	0.520384174	0.003649339	1
4	ENSMUSG00000044340	Phlpp1	2.020528547	1.485862495	0.443432123	0.003799422	1
4	ENSMUSG00000029313	Aff1	2.496941203	1.874107211	0.413958362	0.003965522	1
4	ENSMUSG00000031592	Pcm1	3.004069199	2.324979432	0.369700093	0.003996165	1
4	ENSMUSG00000063558	Aox1	1.463727304	0.965909009	0.599687606	0.004308327	1
4	ENSMUSG00000055799	Tcf7l1	2.415795368	1.623962724	0.572979737	0.004374916	1
4	ENSMUSG00000091243	Vgll3	1.889367416	1.19713392	0.658318731	0.004632553	1
4	ENSMUSG00000058761	Rnf169	1.812955825	1.379348398	0.394356872	0.004716239	1
4	ENSMUSG00000031422	Morf4l2	1.293560892	0.9582853	0.432820825	0.005000096	1
4	ENSMUSG00000037646	Vps13b	3.019745541	2.232511965	0.435759079	0.005071346	1
4	ENSMUSG00000000197	Nalcn	1.95711227	1.332628686	0.554451665	0.00545966	1
4	ENSMUSG00000022475	Hdac7	1.358131406	0.949524331	0.5163462	0.005559427	1
4	ENSMUSG00000039316	Rftn1	1.59813786	1.05315253	0.601677466	0.00572722	1
4	ENSMUSG00000029064	Gnb1	2.254904033	1.740556641	0.373517272	0.005848147	1
4	ENSMUSG00000069729	Arid1b	3.111825629	2.304639418	0.433220176	0.006447865	1
4	ENSMUSG00000022897	Dyrk1a	1.459277408	1.075929645	0.439670422	0.006899522	1
4	ENSMUSG00000015243	Abca1	1.665350992	1.182996526	0.493380438	0.007222911	1
4	ENSMUSG00000037652	Phc3	1.528289132	1.097467377	0.477739452	0.007279199	1
4	ENSMUSG00000052139	Babam2	1.901259734	1.476999491	0.364286305	0.007378018	1
4	ENSMUSG00000055172	C1ra	2.897295109	2.118570034	0.451615819	0.00811335	1
4	ENSMUSG00000046402	Rbp1	1.626192158	1.24241941	0.388345468	0.008433166	1
4	ENSMUSG00000022867	Usp25	1.936341886	1.462989263	0.404414519	0.008602429	1
4	ENSMUSG00000023826	Prkn	2.765573682	2.142389121	0.36835824	0.008654095	1
4	ENSMUSG00000036053	Fmnl2	2.84441174	1.999919343	0.508188499	0.009999905	1
5	ENSMUSG00000042254	Cilp	11.8679574	0.323850022	5.195602003	0	0
5	ENSMUSG00000027750	Postn	11.86368204	0.543430003	4.448313808	3.38E-126	1.03E-121
5	ENSMUSG00000019997	Ccn2	10.05278183	1.108366148	3.181088324	5.66E-116	1.73E-111
5	ENSMUSG00000002020	Ltbp2	2.449047143	0.167760585	3.867744844	5.42E-115	1.65E-110
5	ENSMUSG00000042436	Mfap4	7.320741854	0.968703566	2.917862696	3.15E-110	9.61E-106
5	ENSMUSG00000001493	Meox1	1.989827109	0.199936589	3.315028662	1.33E-109	4.06E-105
5	ENSMUSG00000036040	Adamtsl2	3.85865444	0.585864528	2.719458842	2.37E-87	7.22E-83
5	ENSMUSG00000006014	Prg4	3.152270315	0.565665195	2.478370945	3.52E-69	1.07E-64
5	ENSMUSG00000045312	Lhfpl2	1.63934789	0.243280781	2.752427786	3.34E-65	1.02E-60
5	ENSMUSG00000031375	Bgn	26.84516649	9.781391537	1.456550724	5.68E-63	1.73E-58
5	ENSMUSG00000068196	Col8a1	18.0713679	5.665918428	1.673323978	1.21E-55	3.70E-51
5	ENSMUSG00000030342	Cd9	9.017444823	3.057279141	1.560470409	2.64E-54	8.05E-50
5	ENSMUSG00000021614	Vcan	7.667011328	2.998287409	1.354525628	9.67E-51	2.95E-46
5	ENSMUSG00000030116	Mfap5	15.4919125	6.118519261	1.340260804	1.25E-49	3.82E-45
5	ENSMUSG00000074971	Fibin	5.462180896	1.307624638	2.062528628	1.47E-48	4.47E-44
5	ENSMUSG00000036256	Igfbp7	39.23784333	18.25773354	1.103738063	8.59E-44	2.62E-39
5	ENSMUSG00000021388	Aspn	9.438943637	2.980138431	1.663246062	1.11E-42	3.37E-38
5	ENSMUSG00000030772	Dkk3	1.879670198	0.576731202	1.704508571	1.42E-42	4.34E-38
5	ENSMUSG00000001270	Ckb	2.331319064	0.612298448	1.928839533	6.96E-42	2.12E-37
5	ENSMUSG00000064080	Fbln2	22.25119755	9.822350054	1.17974284	2.53E-40	7.73E-36
5	ENSMUSG00000025780	Itih5	3.405360912	1.181355558	1.527364464	2.88E-40	8.78E-36
5	ENSMUSG00000022371	Col14a1	5.07026746	1.745365303	1.53853283	8.71E-39	2.65E-34
5	ENSMUSG00000022816	Fstl1	16.00697137	7.712721551	1.053388434	2.40E-37	7.32E-33
5	ENSMUSG00000024011	Pi16	12.77438674	6.344526307	1.009669674	4.11E-37	1.25E-32
5	ENSMUSG00000038400	Pmepa1	7.479136933	2.847424009	1.393214457	7.09E-36	2.16E-31
5	ENSMUSG00000040488	Ltbp4	16.42965485	7.798956785	1.07494911	1.07E-34	3.25E-30
5	ENSMUSG00000030562	Nox4	3.566624893	0.994886441	1.841955726	1.32E-34	4.02E-30
5	ENSMUSG00000026335	Pam	14.81012915	7.86375818	0.913293359	3.84E-33	1.17E-28
5	ENSMUSG00000026365	Cfh	39.95719365	19.67098173	1.0223863	1.25E-32	3.82E-28
5	ENSMUSG00000030208	Emp1	5.074175317	2.12910096	1.252929004	4.61E-32	1.41E-27
5	ENSMUSG00000023046	Igfbp6	8.01027123	3.110158878	1.364862813	1.28E-31	3.90E-27
5	ENSMUSG00000027447	Cst3	33.08299867	16.25936282	1.024819286	7.25E-31	2.21E-26
5	ENSMUSG00000022665	Ccdc80	20.46421393	10.11757352	1.016239919	1.05E-30	3.20E-26
5	ENSMUSG00000037370	Enpp1	1.072481525	0.304140813	1.818141462	2.43E-29	7.42E-25
5	ENSMUSG00000026728	Vim	9.951476976	4.805611369	1.050190681	6.30E-29	1.92E-24
5	ENSMUSG00000038244	Mical2	1.64195852	0.528014052	1.636769453	1.30E-28	3.97E-24
5	ENSMUSG00000035493	Tgfbi	2.404746174	0.826433182	1.540914537	2.01E-27	6.13E-23
5	ENSMUSG00000032925	Itgbl1	8.957959682	4.665182647	0.941236608	2.77E-26	8.43E-22
5	ENSMUSG00000024544	Ldlrad4	8.856610437	4.351427447	1.025265921	3.30E-25	1.01E-20
5	ENSMUSG00000000753	Serpinf1	5.9552454	2.565309597	1.21502801	1.88E-24	5.73E-20
5	ENSMUSG00000055632	Hmcn2	4.642498784	2.022866158	1.198500665	3.15E-23	9.59E-19
5	ENSMUSG00000006360	Crip1	5.7565619	2.84629636	1.016121536	6.80E-23	2.07E-18
5	ENSMUSG00000030218	Mgp	72.98957079	37.94568187	0.943754617	7.40E-23	2.26E-18
5	ENSMUSG00000029661	Col1a2	16.90766748	9.911821267	0.770455567	1.87E-21	5.71E-17
5	ENSMUSG00000041120	Nbl1	1.509917372	0.443088748	1.768802007	2.38E-21	7.24E-17
5	ENSMUSG00000048376	F2r	1.557751314	0.590199331	1.400190742	5.70E-21	1.74E-16
5	ENSMUSG00000031659	Adcy7	1.721717395	0.708235125	1.281548055	2.42E-20	7.37E-16
5	ENSMUSG00000018593	Sparc	14.23899061	7.785584719	0.870969579	9.68E-20	2.95E-15
5	ENSMUSG00000021365	Nedd9	2.367023233	1.039897292	1.186632822	1.99E-19	6.07E-15
5	ENSMUSG00000009687	Fxyd5	2.078710483	0.779811009	1.414492411	2.60E-19	7.93E-15
5	ENSMUSG00000001506	Col1a1	12.753619	6.32342306	1.012129039	9.96E-19	3.04E-14
5	ENSMUSG00000079465	Col4a3	3.074067424	1.314719878	1.225393366	4.73E-18	1.44E-13
5	ENSMUSG00000028108	Ecm1	5.21757093	3.011815037	0.792745135	1.83E-17	5.59E-13
5	ENSMUSG00000036446	Lum	17.45025107	10.3743753	0.750223327	3.12E-17	9.51E-13
5	ENSMUSG00000017969	Ptgis	4.769384055	2.608612002	0.870520583	3.91E-17	1.19E-12
5	ENSMUSG00000024940	Ltbp3	2.084132191	1.038738215	1.004614678	1.48E-16	4.52E-12
5	ENSMUSG00000025647	Shisa5	2.04888259	1.046517315	0.969241132	1.65E-16	5.04E-12
5	ENSMUSG00000029309	Sparcl1	15.42605661	9.443513704	0.707973653	1.22E-15	3.71E-11
5	ENSMUSG00000037206	Islr	6.688347436	3.969092319	0.752840673	2.26E-15	6.88E-11
5	ENSMUSG00000040249	Lrp1	15.42109387	10.0015269	0.624684837	2.51E-15	7.66E-11
5	ENSMUSG00000056220	Pla2g4a	2.319146092	1.091173833	1.087712751	2.63E-15	8.03E-11
5	ENSMUSG00000020902	Ntn1	2.625272395	1.367845011	0.940562353	2.64E-15	8.04E-11
5	ENSMUSG00000046402	Rbp1	2.62242378	1.202438051	1.124938273	3.91E-15	1.19E-10
5	ENSMUSG00000028047	Thbs3	1.403581454	0.587955961	1.255332786	5.87E-15	1.79E-10
5	ENSMUSG00000016024	Lbp	1.45525266	0.636113708	1.193913073	8.18E-15	2.49E-10
5	ENSMUSG00000016918	Sulf1	7.444465545	4.841443165	0.62073112	2.78E-14	8.46E-10
5	ENSMUSG00000003228	Grk5	4.02317273	2.014579877	0.997854671	3.23E-14	9.85E-10
5	ENSMUSG00000006800	Sulf2	2.836109085	1.473702469	0.944467741	6.30E-14	1.92E-09
5	ENSMUSG00000041959	S100a10	2.850807884	1.46502206	0.960448431	6.50E-14	1.98E-09
5	ENSMUSG00000031595	Pdgfrl	1.472033201	0.674853668	1.125163597	9.15E-14	2.79E-09
5	ENSMUSG00000079105	C7	5.756212733	2.911191355	0.983510239	1.11E-13	3.37E-09
5	ENSMUSG00000038648	Creb3l2	3.347270479	1.895838807	0.820148829	1.29E-13	3.92E-09
5	ENSMUSG00000062825	Actg1	4.689900789	2.368080484	0.98583929	2.23E-13	6.80E-09
5	ENSMUSG00000026879	Gsn	200.506064	152.1129506	0.398502883	2.40E-13	7.30E-09
5	ENSMUSG00000046169	Adamts6	1.6215744	0.710521639	1.190444726	3.24E-13	9.88E-09
5	ENSMUSG00000016494	Cd34	10.10707359	7.044630294	0.520769439	4.78E-13	1.46E-08
5	ENSMUSG00000020814	Mxra7	2.965607708	1.558565895	0.928108618	5.01E-13	1.53E-08
5	ENSMUSG00000067158	Col4a4	4.769159133	2.814973994	0.760613328	5.17E-13	1.57E-08
5	ENSMUSG00000029580	Actb	8.948450493	5.401386086	0.728308213	5.74E-13	1.75E-08
5	ENSMUSG00000027907	S100a11	2.41115873	1.496558487	0.688077967	1.02E-12	3.11E-08
5	ENSMUSG00000050965	Prkca	4.862900481	2.670943503	0.864467608	1.08E-12	3.30E-08
5	ENSMUSG00000020681	Ace	3.472753022	1.928015241	0.848963356	1.87E-12	5.69E-08
5	ENSMUSG00000026864	Hspa5	12.93595775	9.064334878	0.513113805	2.13E-12	6.49E-08
5	ENSMUSG00000022817	Itgb5	3.987992308	2.279921475	0.806678491	2.45E-12	7.46E-08
5	ENSMUSG00000027660	Skil	1.573458636	0.747944304	1.072936505	4.52E-12	1.38E-07
5	ENSMUSG00000026043	Col3a1	31.89220968	19.04720998	0.743624371	5.86E-12	1.79E-07
5	ENSMUSG00000052911	Lamb2	3.92103126	2.127070648	0.882365192	7.36E-12	2.24E-07
5	ENSMUSG00000027864	Ptgfrn	1.964601919	1.09627416	0.841628376	7.80E-12	2.38E-07
5	ENSMUSG00000020695	Mrc2	3.709783088	2.304625231	0.68680267	9.01E-12	2.75E-07
5	ENSMUSG00000053062	Jam2	1.669691928	0.895572193	0.8987003	9.52E-12	2.90E-07
5	ENSMUSG00000027800	Tm4sf1	2.938354913	1.676679176	0.809402002	1.05E-11	3.19E-07
5	ENSMUSG00000028063	Lmna	1.753045495	0.965834818	0.860015059	1.19E-11	3.62E-07
5	ENSMUSG00000018217	Pmp22	5.956902216	3.809301392	0.645035839	1.25E-11	3.80E-07
5	ENSMUSG00000026547	Tagln2	1.497023451	0.745144639	1.006504424	1.88E-11	5.74E-07
5	ENSMUSG00000024501	Dpysl3	2.951412006	1.660551353	0.829742991	2.32E-11	7.06E-07
5	ENSMUSG00000024713	Pcsk5	1.958148735	0.967917494	1.016534371	2.37E-11	7.23E-07
5	ENSMUSG00000026697	Myoc	3.846613425	1.674940258	1.199479211	3.37E-11	1.03E-06
5	ENSMUSG00000033066	Gas7	1.910759502	1.018380542	0.907869445	3.62E-11	1.10E-06
5	ENSMUSG00000027848	Olfml3	2.897567841	1.677505499	0.788524944	3.82E-11	1.16E-06
5	ENSMUSG00000001025	S100a6	11.41124843	7.450991265	0.614952359	5.85E-11	1.78E-06
5	ENSMUSG00000003032	Klf4	1.894115112	1.1230017	0.7541639	5.86E-11	1.79E-06
5	ENSMUSG00000044646	Zbtb7c	1.496874278	0.798462413	0.906656655	8.10E-11	2.47E-06
5	ENSMUSG00000043895	S1pr2	1.027357302	0.524655721	0.969495079	8.18E-11	2.49E-06
5	ENSMUSG00000017466	Timp2	10.39836663	7.693971231	0.434556588	8.25E-11	2.52E-06
5	ENSMUSG00000032855	Pkd1	4.016335152	2.392911475	0.747112637	1.14E-10	3.49E-06
5	ENSMUSG00000072941	Sod3	1.837439797	1.050097344	0.80717391	1.82E-10	5.53E-06
5	ENSMUSG00000022324	Matn2	3.595028514	2.240898941	0.681925625	1.92E-10	5.84E-06
5	ENSMUSG00000032383	Ppib	6.80931266	4.563284945	0.577436435	2.06E-10	6.28E-06
5	ENSMUSG00000090841	Myl6	3.43498922	2.039145345	0.752340961	2.30E-10	7.00E-06
5	ENSMUSG00000020048	Hsp90b1	12.20496385	8.628532103	0.50028097	2.35E-10	7.17E-06
5	ENSMUSG00000016382	Pls3	1.71135212	0.906903412	0.91611582	2.48E-10	7.56E-06
5	ENSMUSG00000020241	Col6a2	6.429498123	4.457198617	0.528568877	3.21E-10	9.79E-06
5	ENSMUSG00000024084	Qpct	1.466996967	0.848032638	0.790674194	3.59E-10	1.09E-05
5	ENSMUSG00000031451	Gas6	3.524786814	2.087339979	0.755870402	3.61E-10	1.10E-05
5	ENSMUSG00000079017	Ifi27l2a	6.108887648	3.07135834	0.992032864	5.62E-10	1.71E-05
5	ENSMUSG00000022443	Myh9	1.5285197	0.932862766	0.712398381	5.63E-10	1.72E-05
5	ENSMUSG00000031799	Tpm4	2.047299116	1.160889295	0.8184915	5.63E-10	1.72E-05
5	ENSMUSG00000022565	Plec	2.243253168	1.28687037	0.801725715	6.11E-10	1.86E-05
5	ENSMUSG00000031538	Plat	1.387403395	0.73341509	0.919685465	6.66E-10	2.03E-05
5	ENSMUSG00000031965	Tbx20	6.418952862	4.143448723	0.631505898	8.50E-10	2.59E-05
5	ENSMUSG00000035441	Myo1d	1.483584946	0.765106784	0.955354513	8.57E-10	2.61E-05
5	ENSMUSG00000020810	Cygb	3.631567437	2.201658688	0.722001538	8.66E-10	2.64E-05
5	ENSMUSG00000004562	Arhgef40	2.215863103	1.378336426	0.684940688	1.06E-09	3.24E-05
5	ENSMUSG00000055148	Klf2	2.769130258	1.640427412	0.755361162	1.07E-09	3.25E-05
5	ENSMUSG00000025809	Itgb1	7.756252518	5.765230631	0.427981451	1.27E-09	3.86E-05
5	ENSMUSG00000029622	Arpc1b	1.431754689	0.899687927	0.67028776	3.45E-09	0.000105238
5	ENSMUSG00000030657	Xylt1	1.415927082	0.74659171	0.923355576	3.60E-09	0.000109737
5	ENSMUSG00000031740	Mmp2	7.733764818	5.178038944	0.578765077	3.67E-09	0.000111716
5	ENSMUSG00000031274	Col4a5	2.975466486	1.930431113	0.624192795	3.98E-09	0.00012142
5	ENSMUSG00000030122	Ptms	2.007186201	1.342659927	0.580080517	4.39E-09	0.000133692
5	ENSMUSG00000056481	Cd248	2.493211879	1.762872492	0.500077363	4.47E-09	0.00013621
5	ENSMUSG00000007041	Clic1	2.136757358	1.358542004	0.653363918	5.33E-09	0.000162396
5	ENSMUSG00000072812	Ahnak2	1.781037222	1.07583825	0.72725648	5.36E-09	0.000163315
5	ENSMUSG00000007836	Hnrnpa0	1.277572984	0.78166296	0.70878713	5.40E-09	0.000164543
5	ENSMUSG00000020571	Pdia6	4.677878453	3.006223877	0.637901923	5.53E-09	0.000168677
5	ENSMUSG00000072235	Tuba1a	2.253505075	1.47677204	0.609723555	6.08E-09	0.000185224
5	ENSMUSG00000037706	Cd81	8.078043139	5.946105025	0.442060905	8.35E-09	0.000254633
5	ENSMUSG00000015932	Dstn	1.880286931	1.141458846	0.720073988	9.00E-09	0.00027433
5	ENSMUSG00000038991	Txndc5	2.064199271	1.213205682	0.766758091	9.34E-09	0.000284762
5	ENSMUSG00000001119	Col6a1	7.285466828	5.272757848	0.466463676	1.09E-08	0.000330964
5	ENSMUSG00000049775	Tmsb4x	7.035477771	4.566213796	0.623649989	1.13E-08	0.000345933
5	ENSMUSG00000026042	Col5a2	9.065159564	6.280071219	0.529551494	1.22E-08	0.000371406
5	ENSMUSG00000021823	Vcl	1.49102437	0.913635179	0.70661373	2.18E-08	0.000662944
5	ENSMUSG00000040212	Emp3	5.939257732	4.389239421	0.436311672	2.30E-08	0.000700219
5	ENSMUSG00000041736	Tspo	3.014686422	1.986549036	0.60174354	2.40E-08	0.000730775
5	ENSMUSG00000003814	Calr	5.274402818	3.737920309	0.496771945	2.55E-08	0.000776351
5	ENSMUSG00000029718	Pcolce	5.373950326	3.748322867	0.519737759	2.71E-08	0.000826701
5	ENSMUSG00000026463	Atp2b4	1.534340493	0.927494196	0.726208515	3.08E-08	0.000940208
5	ENSMUSG00000019505	Ubb	5.670309799	3.98828743	0.507658173	3.49E-08	0.001062277
5	ENSMUSG00000041577	Prelp	5.38299637	3.504535382	0.619186263	3.56E-08	0.001084331
5	ENSMUSG00000069833	Ahnak	7.946599573	5.805209836	0.452989434	4.07E-08	0.001241137
5	ENSMUSG00000004508	Gab2	13.85030521	9.964470492	0.47505272	4.09E-08	0.001247677
5	ENSMUSG00000051331	Cacna1c	2.154947619	1.552287271	0.47325723	4.44E-08	0.001352822
5	ENSMUSG00000055053	Nfic	2.26450491	1.4309972	0.662174819	4.46E-08	0.001360843
5	ENSMUSG00000032307	Ube2q2	1.071756038	0.618445825	0.793257416	4.75E-08	0.00144909
5	ENSMUSG00000026238	Ptma	5.598816042	3.776749259	0.567976773	4.81E-08	0.001465858
5	ENSMUSG00000079037	Prnp	1.11449778	0.655328286	0.766104033	5.11E-08	0.001557824
5	ENSMUSG00000031503	Col4a2	6.168816361	4.112364344	0.585025611	5.29E-08	0.001611767
5	ENSMUSG00000068566	Myadm	2.278832338	1.49402258	0.609092832	6.75E-08	0.002058425
5	ENSMUSG00000036545	Adamts2	4.191125105	2.758830215	0.603280914	7.58E-08	0.00230902
5	ENSMUSG00000028339	Col15a1	11.74911396	7.863733528	0.579265622	8.91E-08	0.002715843
5	ENSMUSG00000027642	Rpn2	2.349293428	1.606529842	0.548279138	9.09E-08	0.002770129
5	ENSMUSG00000054364	Rhob	1.464471766	0.855176977	0.776085461	1.12E-07	0.003400118
5	ENSMUSG00000068220	Lgals1	3.469116301	2.177562746	0.671853917	1.18E-07	0.003603358
5	ENSMUSG00000029478	Ncor2	1.695101392	1.031593213	0.716497384	1.34E-07	0.004078357
5	ENSMUSG00000039959	Hip1	2.0305438	1.392289425	0.544407002	1.37E-07	0.004166545
5	ENSMUSG00000050708	Ftl1	8.073017258	5.759497503	0.487165029	1.57E-07	0.004772828
5	ENSMUSG00000047126	Cltc	2.02284327	1.417229996	0.513310639	1.61E-07	0.004922026
5	ENSMUSG00000028822	Tmem50a	3.346690197	2.38218988	0.490446595	1.62E-07	0.004950533
5	ENSMUSG00000030074	Gxylt2	2.464681242	1.572318675	0.648507424	1.82E-07	0.005533835
5	ENSMUSG00000027712	Anxa5	2.346724449	1.462418545	0.682292181	2.01E-07	0.006121097
5	ENSMUSG00000014867	Surf4	1.378669199	0.825836903	0.739347543	2.81E-07	0.008567762
5	ENSMUSG00000007817	Zmiz1	2.21718074	1.498250668	0.565447363	2.89E-07	0.008804582
5	ENSMUSG00000026837	Col5a1	5.557662583	4.081710248	0.445304476	3.17E-07	0.009649893
5	ENSMUSG00000038872	Zfhx3	2.441721304	1.576810077	0.630889641	3.79E-07	0.011546993
5	ENSMUSG00000027656	Ccn5	2.502085697	1.224947188	1.030411653	5.28E-07	0.016105536
5	ENSMUSG00000037499	Nenf	3.199139884	2.320156761	0.463461793	5.41E-07	0.016489771
5	ENSMUSG00000032334	Loxl1	5.253266755	3.8993847	0.429968352	6.13E-07	0.018690811
5	ENSMUSG00000030824	Nucb1	1.497724939	0.945912773	0.662993635	6.27E-07	0.019124553
5	ENSMUSG00000029050	Ski	1.933302002	1.396416115	0.469338108	6.28E-07	0.019152076
5	ENSMUSG00000031007	Atp6ap2	1.046813096	0.657629594	0.67065675	6.39E-07	0.019480279
5	ENSMUSG00000070436	Serpinh1	5.810442486	4.464736179	0.380073105	6.55E-07	0.019967218
5	ENSMUSG00000001911	Nfix	3.367504257	2.458275357	0.454033245	6.63E-07	0.020193946
5	ENSMUSG00000029163	Emilin1	2.60590452	1.875586341	0.474442547	6.94E-07	0.021157948
5	ENSMUSG00000039953	Clstn1	1.768443764	1.212779339	0.544163261	7.31E-07	0.022291513
5	ENSMUSG00000000555	Itga5	1.406950321	0.855712637	0.717373087	8.15E-07	0.024826078
5	ENSMUSG00000026223	Itm2c	1.930610116	1.317803657	0.550921408	8.20E-07	0.025006824
5	ENSMUSG00000025130	P4hb	3.213933109	2.364338083	0.442903558	8.21E-07	0.025020255
5	ENSMUSG00000031447	Lamp1	5.63179522	4.046435241	0.47694337	8.42E-07	0.025671255
5	ENSMUSG00000034462	Pkd2	3.037563287	2.296049266	0.403760869	1.33E-06	0.040406675
5	ENSMUSG00000002014	Ssr4	2.682881382	1.702910609	0.655780564	1.49E-06	0.045486993
5	ENSMUSG00000025203	Scd2	1.499391595	1.019492932	0.556525447	1.64E-06	0.049909353
5	ENSMUSG00000096054	Syne1	3.07391784	2.117716411	0.537569198	1.68E-06	0.051178846
5	ENSMUSG00000020368	Canx	3.974244231	2.99988097	0.405775276	1.69E-06	0.051504129
5	ENSMUSG00000019362	D8Ertd738e	1.128227639	0.796020998	0.503179793	1.70E-06	0.051914797
5	ENSMUSG00000021665	Hexb	1.193665024	0.809789921	0.559778441	1.75E-06	0.053248817
5	ENSMUSG00000021477	Ctsl	7.675998276	5.776356469	0.410194611	1.76E-06	0.05351591
5	ENSMUSG00000015354	Pcolce2	4.05984866	2.942459999	0.464403146	1.89E-06	0.057688353
5	ENSMUSG00000032666	1700025G04Rik	1.418602913	0.983991944	0.527752406	2.19E-06	0.066888624
5	ENSMUSG00000075602	Ly6a	5.866477949	4.356367789	0.429368854	2.33E-06	0.071004011
5	ENSMUSG00000026399	Cd55	3.043670865	2.343817047	0.376952397	2.38E-06	0.072493091
5	ENSMUSG00000037742	Eef1a1	5.970106062	4.467145552	0.418403299	2.45E-06	0.07482224
5	ENSMUSG00000007891	Ctsd	3.015349282	2.273194575	0.407603949	2.51E-06	0.076567448
5	ENSMUSG00000020473	Aebp1	3.625608494	2.539035164	0.513942771	2.63E-06	0.080222004
5	ENSMUSG00000039115	Itga9	1.884244326	1.223164458	0.623367657	2.80E-06	0.085459156
5	ENSMUSG00000027248	Pdia3	6.204955204	4.598210209	0.432348374	2.83E-06	0.086316202
5	ENSMUSG00000024012	Mtch1	2.52842445	1.820682964	0.473758944	3.38E-06	0.103113246
5	ENSMUSG00000010830	Kdelr3	1.17464359	0.78724857	0.577331944	3.47E-06	0.10582764
5	ENSMUSG00000021248	Tmed10	4.011727101	2.911857264	0.462283832	3.51E-06	0.106990384
5	ENSMUSG00000038776	Ephx1	1.250409005	0.846473979	0.562862449	3.91E-06	0.1191338
5	ENSMUSG00000070047	Fat1	1.652764368	1.089362086	0.601397494	3.98E-06	0.121256107
5	ENSMUSG00000021759	Plpp1	3.027879032	2.294052524	0.400409145	4.72E-06	0.143973624
5	ENSMUSG00000022892	App	7.42969362	5.658485811	0.392886674	4.73E-06	0.144117598
5	ENSMUSG00000037624	Kcnk2	1.972278196	1.327331632	0.571334192	4.75E-06	0.144668112
5	ENSMUSG00000027006	Dnajc10	1.787843125	1.27901538	0.48318654	4.85E-06	0.147926991
5	ENSMUSG00000071866	Ppia	3.269008074	2.537373711	0.365516921	4.92E-06	0.149874159
5	ENSMUSG00000026721	Rabgap1l	3.574633853	2.572013972	0.474896995	5.27E-06	0.16067753
5	ENSMUSG00000026155	Smap1	1.421959038	0.917046654	0.63281287	5.35E-06	0.163045808
5	ENSMUSG00000025232	Hexa	1.486319346	0.943770809	0.655235668	5.57E-06	0.16985429
5	ENSMUSG00000004460	Dnajb11	1.596223166	1.099091723	0.538350578	5.82E-06	0.177379091
5	ENSMUSG00000002885	Adgre5	1.21667934	0.82644142	0.557964524	6.15E-06	0.187427245
5	ENSMUSG00000031207	Msn	1.445518419	0.95148326	0.603336812	6.23E-06	0.189987641
5	ENSMUSG00000016487	Ppfibp1	1.552333813	1.123954501	0.465855192	6.85E-06	0.208634863
5	ENSMUSG00000022505	Emp2	1.276773882	0.790607589	0.691469336	7.16E-06	0.218078667
5	ENSMUSG00000042116	Vwa1	1.597500676	1.182772463	0.433643981	7.28E-06	0.221935788
5	ENSMUSG00000016256	Ctsz	3.02296116	2.217572966	0.446980867	7.69E-06	0.234477002
5	ENSMUSG00000020961	Ston2	1.287341726	0.922890041	0.480164397	7.79E-06	0.237396446
5	ENSMUSG00000023191	P3h3	1.408164018	0.956152928	0.558502096	8.02E-06	0.24446176
5	ENSMUSG00000113907	Gm47167	1.639469429	1.121193577	0.548193616	8.62E-06	0.262679795
5	ENSMUSG00000079523	Tmsb10	2.349634797	1.748982971	0.425920294	1.01E-05	0.307908279
5	ENSMUSG00000009575	Cbx5	1.615894335	1.225098458	0.399435162	1.02E-05	0.309373536
5	ENSMUSG00000015085	Entpd2	3.999003879	3.030475909	0.400096307	1.04E-05	0.317500345
5	ENSMUSG00000022812	Gsk3b	2.969200294	2.308935539	0.36284652	1.06E-05	0.3233072
5	ENSMUSG00000009013	Dynll1	1.674774237	1.123922024	0.575424683	1.07E-05	0.325607048
5	ENSMUSG00000057738	Sptan1	2.963265161	2.082838345	0.508636856	1.10E-05	0.334945257
5	ENSMUSG00000075701	Selenos	2.372086484	1.742751372	0.444789847	1.25E-05	0.379547753
5	ENSMUSG00000027087	Itgav	1.908991689	1.282445657	0.573913129	1.61E-05	0.489901971
5	ENSMUSG00000031328	Flna	1.802032408	1.117472575	0.689385532	1.65E-05	0.502855874
5	ENSMUSG00000026836	Acvr1	1.126956969	0.783097031	0.525169448	1.82E-05	0.555539724
5	ENSMUSG00000021458	Aopep	3.719708858	2.784292476	0.417878938	2.03E-05	0.618046183
5	ENSMUSG00000024659	Anxa1	1.943527101	1.321937605	0.556023141	2.03E-05	0.619029946
5	ENSMUSG00000037072	Selenof	2.84393388	2.092648446	0.442557956	2.09E-05	0.63604976
5	ENSMUSG00000019873	Reep3	1.582590936	1.099311525	0.525688121	2.18E-05	0.663707786
5	ENSMUSG00000025823	Pdia4	1.0363423	0.702225428	0.561494456	2.36E-05	0.720619873
5	ENSMUSG00000030067	Foxp1	2.309014404	1.762030065	0.390038633	2.43E-05	0.740018716
5	ENSMUSG00000013076	Amotl1	1.261604673	0.853254804	0.564211372	2.53E-05	0.769669439
5	ENSMUSG00000020849	Ywhae	2.546326886	1.923769982	0.404481326	2.98E-05	0.909705553
5	ENSMUSG00000060802	B2m	5.987196527	4.52316335	0.404548528	3.03E-05	0.922402192
5	ENSMUSG00000029070	Mxra8	3.031178113	2.354773296	0.364290456	3.13E-05	0.953700815
5	ENSMUSG00000048612	Myof	1.307119969	0.989696153	0.401333983	3.24E-05	0.986288146
5	ENSMUSG00000022883	Robo1	2.185367499	1.604568484	0.445690543	3.41E-05	1
5	ENSMUSG00000029465	Arpc3	1.35836855	0.982085841	0.467953926	3.46E-05	1
5	ENSMUSG00000039529	Atp8b1	2.090920371	1.425524079	0.552645712	3.81E-05	1
5	ENSMUSG00000021484	Lman2	1.051751792	0.744014861	0.499390933	3.82E-05	1
5	ENSMUSG00000079435	Rpl36a	1.70115878	1.301972264	0.385819089	3.91E-05	1
5	ENSMUSG00000036438	Calm2	2.024178679	1.412423391	0.519164027	4.11E-05	1
5	ENSMUSG00000071076	Jund	2.208971307	1.53763617	0.522660501	4.36E-05	1
5	ENSMUSG00000079111	Kdelr2	2.035458263	1.473324221	0.466278693	4.49E-05	1
5	ENSMUSG00000005873	Reep5	2.972588435	2.146595394	0.469669444	4.68E-05	1
5	ENSMUSG00000078974	Sec61g	1.267489552	0.939556477	0.431922064	6.41E-05	1
5	ENSMUSG00000009291	Pttg1ip	1.849921215	1.309817597	0.498097911	6.76E-05	1
5	ENSMUSG00000001891	Ugp2	3.371757953	2.355568718	0.517425554	7.46E-05	1
5	ENSMUSG00000030717	Nupr1	1.909123337	1.188685011	0.683543842	7.65E-05	1
5	ENSMUSG00000028367	Txn1	1.309215286	0.828212108	0.660630153	8.05E-05	1
5	ENSMUSG00000025289	Prdx4	1.422577724	1.02933367	0.466796754	8.27E-05	1
5	ENSMUSG00000038274	Fau	6.294978191	4.822163472	0.384520821	8.44E-05	1
5	ENSMUSG00000024538	Ppic	1.336124377	0.917625608	0.542076754	9.70E-05	1
5	ENSMUSG00000031556	Tm2d2	1.202504661	0.786885482	0.61181689	9.72E-05	1
5	ENSMUSG00000041084	Ostc	1.75800985	1.310545642	0.423775555	0.000106868	1
5	ENSMUSG00000032440	Tgfbr2	3.298301802	2.490139498	0.40549685	0.000111622	1
5	ENSMUSG00000034708	Grn	1.845680965	1.359189175	0.44140693	0.000119065	1
5	ENSMUSG00000032231	Anxa2	2.122065271	1.501438895	0.49912327	0.000123621	1
5	ENSMUSG00000034205	Loxl2	1.571265544	1.00934473	0.638508023	0.000130791	1
5	ENSMUSG00000039156	Stim2	1.269235673	0.934840624	0.441167642	0.000140366	1
5	ENSMUSG00000035934	Pknox2	1.619227757	1.158121627	0.483519152	0.000142136	1
5	ENSMUSG00000007872	Id3	1.782377663	1.113057795	0.679274552	0.000156146	1
5	ENSMUSG00000032803	Cdv3	1.394543708	1.073426467	0.377569787	0.000167843	1
5	ENSMUSG00000029659	Medag	3.934393668	3.026750185	0.378371712	0.000173732	1
5	ENSMUSG00000032042	Srpr	2.462796758	1.809310061	0.444857911	0.000174278	1
5	ENSMUSG00000052681	Rap1b	1.67129706	1.136469992	0.556408593	0.000183614	1
5	ENSMUSG00000022283	Pabpc1	1.198397137	0.856495031	0.484589301	0.000184875	1
5	ENSMUSG00000029048	Rer1	1.493796335	1.121709381	0.413284521	0.000212265	1
5	ENSMUSG00000030259	Rassf8	1.160540266	0.821239087	0.498922379	0.000240534	1
5	ENSMUSG00000021361	Tmem14c	1.115016244	0.850830136	0.390121689	0.000269396	1
5	ENSMUSG00000006519	Cyba	2.624176104	2.010924815	0.384005398	0.0002745	1
5	ENSMUSG00000018707	Dync1h1	2.405344116	1.774483975	0.438843759	0.000285816	1
5	ENSMUSG00000006369	Fbln1	7.908219051	6.103817072	0.373641107	0.000294563	1
5	ENSMUSG00000035158	Mitf	1.222962142	0.92653643	0.400460138	0.000358608	1
5	ENSMUSG00000021427	Ssr1	1.484325435	1.1492548	0.369108743	0.000363806	1
5	ENSMUSG00000052560	Cpne8	1.354942967	1.02368105	0.404465844	0.00042323	1
5	ENSMUSG00000038127	Ccdc50	2.033467663	1.48266734	0.455747107	0.000423732	1
5	ENSMUSG00000058569	Tmed9	2.923897918	2.245955114	0.380563848	0.000440563	1
5	ENSMUSG00000102368	4930590L20Rik	2.13669973	1.508354324	0.502408812	0.000493638	1
5	ENSMUSG00000024853	Sf3b2	1.500422165	1.107019521	0.438687818	0.000499975	1
5	ENSMUSG00000032399	Rpl4	1.988548508	1.441579277	0.464065577	0.000503476	1
5	ENSMUSG00000040118	Cacna2d1	3.359681413	2.5321963	0.407935184	0.000508147	1
5	ENSMUSG00000029311	Hsd17b11	1.177119498	0.879934255	0.419793146	0.000528969	1
5	ENSMUSG00000029103	Lrpap1	1.714521805	1.187506891	0.529870367	0.000531346	1
5	ENSMUSG00000002015	Bcap31	1.66537357	1.241117923	0.424205636	0.000548605	1
5	ENSMUSG00000048537	Phldb1	1.627243237	1.265676316	0.362521421	0.000578971	1
5	ENSMUSG00000001175	Calm1	2.525733677	1.885250493	0.421946297	0.00063751	1
5	ENSMUSG00000056629	Fkbp2	1.462843497	1.128903343	0.373853463	0.000687536	1
5	ENSMUSG00000036053	Fmnl2	2.672340044	2.008598119	0.411914658	0.000858839	1
5	ENSMUSG00000030536	Iqgap1	2.007148833	1.550524205	0.372391551	0.000988167	1
5	ENSMUSG00000024308	Tapbp	1.629930401	1.240173148	0.394268804	0.001080344	1
5	ENSMUSG00000019087	Atp6ap1	1.077184437	0.823426011	0.387554364	0.001236698	1
5	ENSMUSG00000034994	Eef2	2.678313048	2.085671228	0.360812838	0.001378647	1
5	ENSMUSG00000041891	Lman1	2.284756944	1.698606717	0.427688837	0.001500981	1
5	ENSMUSG00000053580	Tanc2	1.636910274	1.175222909	0.478040819	0.001550901	1
5	ENSMUSG00000022285	Ywhaz	1.472778694	1.11529831	0.40111102	0.00172965	1
5	ENSMUSG00000050212	Eva1b	1.148810677	0.871269946	0.398949378	0.001918953	1
5	ENSMUSG00000022048	Dpysl2	1.9465544	1.420833203	0.454185463	0.002238743	1
5	ENSMUSG00000018293	Pfn1	1.350839185	1.003258697	0.429162273	0.002635618	1
5	ENSMUSG00000055116	Arntl	1.319732956	0.987076002	0.419012956	0.002747983	1
5	ENSMUSG00000030172	Erc1	1.341844382	1.028763532	0.38330596	0.002814354	1
5	ENSMUSG00000036158	Prickle1	2.275885393	1.745266933	0.382980201	0.002910168	1
5	ENSMUSG00000019579	Mydgf	1.290232668	0.967443502	0.415381934	0.003048846	1
5	ENSMUSG00000057113	Npm1	1.221786398	0.951324101	0.36098325	0.003371788	1
5	ENSMUSG00000067212	H2-T23	1.338109319	1.035811238	0.369434867	0.004700427	1
5	ENSMUSG00000048915	Efna5	2.845227983	2.178268347	0.385362563	0.006151298	1
6	ENSMUSG00000041482	Piezo2	3.793564079	0.231768244	4.032799092	2.85E-164	8.69E-160
6	ENSMUSG00000020427	Igfbp3	10.309933	0.508555543	4.341485795	3.43E-162	1.05E-157
6	ENSMUSG00000025892	Gria4	4.047906372	0.189032626	4.420468762	3.82E-132	1.16E-127
6	ENSMUSG00000039899	Fgl2	5.22936155	0.55112914	3.246172505	1.22E-109	3.72E-105
6	ENSMUSG00000036867	Smad6	2.530267742	0.219757619	3.525304965	2.29E-85	6.98E-81
6	ENSMUSG00000066842	Hmcn1	3.917974061	0.492374867	2.992278818	2.69E-75	8.19E-71
6	ENSMUSG00000031636	Pdlim3	4.725605832	0.924632004	2.353548093	2.34E-60	7.13E-56
6	ENSMUSG00000030772	Dkk3	2.414793749	0.560569477	2.106934875	2.20E-51	6.72E-47
6	ENSMUSG00000024076	Vit	4.457698502	1.294345294	1.784076505	2.51E-45	7.65E-41
6	ENSMUSG00000029765	Plxna4	2.103428787	0.347410372	2.598030244	7.27E-41	2.22E-36
6	ENSMUSG00000025909	Sntg1	6.840501676	1.4252237	2.262913755	2.78E-40	8.49E-36
6	ENSMUSG00000031965	Tbx20	13.4462682	3.885624059	1.790987602	1.46E-39	4.44E-35
6	ENSMUSG00000002985	Apoe	59.71647305	23.3144162	1.356906656	3.35E-37	1.02E-32
6	ENSMUSG00000064294	Aox3	2.160679005	0.383753264	2.493233832	1.11E-36	3.39E-32
6	ENSMUSG00000026365	Cfh	43.5622648	19.59746668	1.152411789	2.26E-36	6.90E-32
6	ENSMUSG00000038463	Olfml2b	2.005385691	0.435957653	2.201619823	1.25E-35	3.81E-31
6	ENSMUSG00000028289	Epha7	1.695193138	0.339223078	2.321143424	4.06E-34	1.24E-29
6	ENSMUSG00000019990	Pde7b	5.07568902	1.324650236	1.937992203	1.75E-28	5.35E-24
6	ENSMUSG00000046159	Chrm3	3.514082253	0.853267336	2.042078234	8.00E-27	2.44E-22
6	ENSMUSG00000006369	Fbln1	12.65986808	5.930300884	1.094085162	2.77E-26	8.46E-22
6	ENSMUSG00000007872	Id3	3.135065297	1.064139933	1.558807616	3.87E-22	1.18E-17
6	ENSMUSG00000020044	Timp3	10.66454415	4.328951085	1.300732896	2.54E-21	7.75E-17
6	ENSMUSG00000032006	Pdgfd	2.796859554	0.754452937	1.890304997	1.06E-19	3.23E-15
6	ENSMUSG00000029810	Tmem176b	1.655080874	0.549391839	1.590994329	1.56E-19	4.76E-15
6	ENSMUSG00000024548	Setbp1	7.473917513	3.402235923	1.135381455	8.37E-19	2.55E-14
6	ENSMUSG00000022371	Col14a1	4.82976672	1.764645558	1.452575071	2.32E-18	7.08E-14
6	ENSMUSG00000025880	Smad7	2.297709663	0.705632273	1.70320806	3.20E-18	9.75E-14
6	ENSMUSG00000024998	Plce1	4.143763333	1.848862461	1.164303702	4.73E-18	1.44E-13
6	ENSMUSG00000033965	Slc16a2	5.037267928	2.091897254	1.267829475	5.60E-18	1.71E-13
6	ENSMUSG00000020023	Tmcc3	3.829317982	1.41821961	1.433006516	8.78E-18	2.68E-13
6	ENSMUSG00000059921	Unc5c	1.889096735	0.603879102	1.645364927	1.10E-17	3.35E-13
6	ENSMUSG00000040170	Fmo2	4.860011232	2.020626219	1.266157175	2.64E-17	8.04E-13
6	ENSMUSG00000022754	Tmem45a	2.37758741	0.888547188	1.419978082	8.69E-17	2.65E-12
6	ENSMUSG00000030218	Mgp	70.03726385	38.16462436	0.875886731	1.11E-16	3.39E-12
6	ENSMUSG00000021219	Rgs6	3.59129965	1.466670676	1.291961066	7.58E-16	2.31E-11
6	ENSMUSG00000047793	Sned1	1.780045297	0.566329791	1.652199626	2.18E-15	6.65E-11
6	ENSMUSG00000041794	Myrip	2.036810423	0.761986638	1.418474102	3.00E-15	9.15E-11
6	ENSMUSG00000038388	Mpp6	1.8515743	0.66796155	1.47091548	5.34E-15	1.63E-10
6	ENSMUSG00000019997	Ccn2	3.80565282	1.371268454	1.472632918	7.32E-14	2.23E-09
6	ENSMUSG00000050315	Synpo2	2.220965137	0.726593093	1.611967189	1.72E-13	5.24E-09
6	ENSMUSG00000087201	Gm15261	6.131442521	3.512647588	0.803667688	1.92E-13	5.85E-09
6	ENSMUSG00000024899	Papss2	3.154102425	1.14829981	1.457730146	3.62E-13	1.10E-08
6	ENSMUSG00000041741	Pde3a	6.765472033	3.304342967	1.03382716	1.67E-12	5.10E-08
6	ENSMUSG00000061080	Lsamp	13.63806832	7.405888045	0.880894672	1.95E-12	5.94E-08
6	ENSMUSG00000035441	Myo1d	1.92706685	0.750602466	1.360285684	2.94E-12	8.95E-08
6	ENSMUSG00000026872	Zeb2	11.28295701	6.840371017	0.721998733	4.76E-12	1.45E-07
6	ENSMUSG00000026014	Raph1	4.677324302	2.52988325	0.886612653	8.63E-12	2.63E-07
6	ENSMUSG00000024140	Epas1	1.665468603	0.785621813	1.084021265	4.11E-11	1.25E-06
6	ENSMUSG00000031451	Gas6	3.952882092	2.075624839	0.929359217	6.23E-11	1.90E-06
6	ENSMUSG00000028108	Ecm1	5.71833378	2.999722463	0.930765805	6.29E-11	1.92E-06
6	ENSMUSG00000001768	Rin2	2.832538827	1.453076454	0.962985119	7.07E-11	2.16E-06
6	ENSMUSG00000052726	Kcnt2	16.53991038	10.58099988	0.644475453	7.16E-11	2.18E-06
6	ENSMUSG00000052920	Prkg1	15.5208304	7.924744865	0.969769353	9.74E-11	2.97E-06
6	ENSMUSG00000059602	Syn3	2.40382454	0.936575604	1.35986423	1.02E-10	3.11E-06
6	ENSMUSG00000036158	Prickle1	3.389633999	1.704927021	0.991419518	1.51E-10	4.61E-06
6	ENSMUSG00000027447	Cst3	24.93695297	16.61803624	0.585535286	2.15E-10	6.54E-06
6	ENSMUSG00000027684	Mecom	13.5250782	8.706099435	0.635538533	2.16E-10	6.60E-06
6	ENSMUSG00000003452	Bicd1	1.720722211	0.680323515	1.33872135	3.59E-10	1.09E-05
6	ENSMUSG00000026697	Myoc	5.029372131	1.637042638	1.619286406	1.66E-09	5.05E-05
6	ENSMUSG00000019889	Ptprk	2.494792565	1.204071447	1.050998863	1.68E-09	5.12E-05
6	ENSMUSG00000031595	Pdgfrl	1.595700102	0.672643094	1.246276419	2.30E-09	7.00E-05
6	ENSMUSG00000031343	Gabra3	2.138566679	0.854107172	1.324155176	2.67E-09	8.15E-05
6	ENSMUSG00000021699	Pde4d	3.330601654	1.860031957	0.840455407	5.94E-09	0.000180959
6	ENSMUSG00000015243	Abca1	2.201498454	1.165210763	0.917894899	7.03E-09	0.000214274
6	ENSMUSG00000029635	Cdk8	7.334892713	4.27704349	0.778161987	7.50E-09	0.000228447
6	ENSMUSG00000043631	Ecm2	5.14962821	3.392556121	0.602095596	8.50E-09	0.000258999
6	ENSMUSG00000061143	Maml3	2.893461476	1.414153307	1.032857906	9.02E-09	0.000274839
6	ENSMUSG00000027800	Tm4sf1	3.003720413	1.678093	0.83992786	1.14E-08	0.000348289
6	ENSMUSG00000031523	Dlc1	21.02263703	14.22773998	0.563237136	4.42E-08	0.001346292
6	ENSMUSG00000058571	Gpc6	27.90366231	20.23550682	0.463565503	4.87E-08	0.001485121
6	ENSMUSG00000032826	Ank2	8.03571053	5.269562785	0.608742328	5.27E-08	0.001605958
6	ENSMUSG00000056870	Gulp1	6.669279105	4.615094233	0.531170721	1.57E-07	0.004793944
6	ENSMUSG00000028565	Nfia	19.92479242	14.04784225	0.504216145	1.77E-07	0.005391438
6	ENSMUSG00000097462	9530026P05Rik	3.656362721	2.1113662	0.792232372	1.95E-07	0.005928997
6	ENSMUSG00000029563	Foxp2	9.591402494	5.946010604	0.689819751	2.34E-07	0.007141808
6	ENSMUSG00000068036	Afdn	2.772808184	1.773703419	0.644583021	3.00E-07	0.009133583
6	ENSMUSG00000021903	Galnt15	1.635867182	0.763068543	1.10017106	6.57E-07	0.020023079
6	ENSMUSG00000028161	Ppp3ca	5.572158922	3.583280408	0.63695546	7.17E-07	0.021852966
6	ENSMUSG00000006800	Sulf2	2.508644894	1.490229217	0.751374014	8.64E-07	0.026336607
6	ENSMUSG00000028226	Mmp16	1.881445018	1.009338136	0.89843156	1.01E-06	0.030687365
6	ENSMUSG00000024043	Arhgap28	1.755791054	0.866217919	1.019319246	1.13E-06	0.034561122
6	ENSMUSG00000030516	Tjp1	2.393602982	1.312919816	0.866405068	1.66E-06	0.050540474
6	ENSMUSG00000008575	Nfib	10.75487783	7.896260904	0.445749573	1.74E-06	0.053041386
6	ENSMUSG00000032656	Marchf3	2.790564067	1.480739437	0.914238974	4.62E-06	0.140926577
6	ENSMUSG00000028634	Hivep3	2.008449669	1.022584731	0.97386192	4.88E-06	0.148832763
6	ENSMUSG00000031529	Tnks	1.884888234	1.091008035	0.788817253	6.14E-06	0.187196121
6	ENSMUSG00000005514	Por	1.824321524	1.088757638	0.744677177	8.26E-06	0.251905125
6	ENSMUSG00000031355	Arhgap6	9.185827334	5.61795687	0.709364117	8.61E-06	0.262375021
6	ENSMUSG00000023092	Fhl1	1.818661986	0.988767796	0.87917377	2.21E-05	0.674830586
6	ENSMUSG00000024236	Svil	4.727108839	3.444360422	0.456721966	2.46E-05	0.749086752
6	ENSMUSG00000024299	Adamts10	3.236674246	2.143661558	0.594435023	2.67E-05	0.814949038
6	ENSMUSG00000048490	Nrip1	3.360294266	2.258290262	0.573356647	2.75E-05	0.839099225
6	ENSMUSG00000042942	Greb1l	2.055741806	1.193556175	0.78439261	3.13E-05	0.952874469
6	ENSMUSG00000040037	Negr1	9.519217866	6.372016928	0.579092942	3.75E-05	1
6	ENSMUSG00000026879	Gsn	208.983709	151.9421885	0.459867977	4.36E-05	1
6	ENSMUSG00000022665	Ccdc80	14.5641111	10.37170745	0.489764233	4.54E-05	1
6	ENSMUSG00000072294	Klf12	3.122687244	2.033646019	0.618719499	5.93E-05	1
6	ENSMUSG00000021779	Thrb	2.056401237	1.257551596	0.709504191	6.00E-05	1
6	ENSMUSG00000024085	Man2a1	7.000157755	4.774546948	0.552023591	6.94E-05	1
6	ENSMUSG00000054619	Mettl7a1	1.514142221	0.902599737	0.746342459	7.44E-05	1
6	ENSMUSG00000021944	Gata4	2.136305284	1.338158488	0.674868833	7.60E-05	1
6	ENSMUSG00000054728	Phactr1	2.14827769	1.280805356	0.746129244	8.17E-05	1
6	ENSMUSG00000034574	Daam1	2.822054219	1.945766026	0.536407467	8.51E-05	1
6	ENSMUSG00000035934	Pknox2	1.773766425	1.153714949	0.620529225	8.79E-05	1
6	ENSMUSG00000052572	Dlg2	2.833161454	2.07740874	0.447627718	9.72E-05	1
6	ENSMUSG00000030691	Fchsd2	2.615753181	1.875120687	0.480242963	0.000145712	1
6	ENSMUSG00000038400	Pmepa1	4.003654966	2.99262696	0.419905195	0.000164011	1
6	ENSMUSG00000073557	Ppp1r12b	2.73733281	1.890106467	0.534303349	0.000176693	1
6	ENSMUSG00000019961	Tmpo	1.420493066	0.850739158	0.739603023	0.000214866	1
6	ENSMUSG00000033721	Vav3	3.994006924	2.643412	0.595435534	0.000243609	1
6	ENSMUSG00000020902	Ntn1	2.27870783	1.384768942	0.718570685	0.000244668	1
6	ENSMUSG00000019775	Rgs17	2.170029886	1.482189952	0.549984562	0.000258942	1
6	ENSMUSG00000052713	Zfp608	1.314853924	0.842030536	0.642958071	0.000284207	1
6	ENSMUSG00000027309	4930402H24Rik	2.416989099	1.609670925	0.586445186	0.00030348	1
6	ENSMUSG00000032097	Ddx6	2.218686146	1.514039376	0.551302873	0.00034174	1
6	ENSMUSG00000034780	B3galt1	5.936110578	4.170306391	0.509364585	0.000381485	1
6	ENSMUSG00000045680	Tcf21	1.471158994	0.89500503	0.716985477	0.000409439	1
6	ENSMUSG00000003847	Nfat5	4.564796156	3.315476326	0.461334284	0.000564126	1
6	ENSMUSG00000020844	Nxn	1.877965628	1.088807123	0.786422248	0.000780291	1
6	ENSMUSG00000033863	Klf9	4.530572746	2.934275773	0.626688977	0.000916544	1
6	ENSMUSG00000032038	St3gal4	2.409483265	1.535591512	0.649929291	0.00093033	1
6	ENSMUSG00000022228	Zscan26	1.376239347	0.979132007	0.491156114	0.00110931	1
6	ENSMUSG00000048332	Lhfp	12.08010013	9.151621634	0.400533101	0.001160971	1
6	ENSMUSG00000026074	Map4k4	3.30888568	2.354115059	0.491160613	0.001234221	1
6	ENSMUSG00000063972	Nr6a1	1.934729303	1.25493927	0.624514176	0.001270781	1
6	ENSMUSG00000004508	Gab2	13.02420388	10.00754222	0.380107487	0.001273507	1
6	ENSMUSG00000040987	Mill2	2.320526705	1.709093524	0.441220955	0.001481402	1
6	ENSMUSG00000039497	Dse	1.443051729	0.997421374	0.532847993	0.001586165	1
6	ENSMUSG00000029108	Pcdh7	6.227376287	4.199981801	0.56824138	0.001853495	1
6	ENSMUSG00000007817	Zmiz1	2.168013058	1.502312732	0.52918828	0.001935731	1
6	ENSMUSG00000018076	Med13l	2.062793979	1.405787735	0.553220966	0.002695091	1
6	ENSMUSG00000021981	Cab39l	1.668543657	1.114952054	0.581607763	0.002885403	1
6	ENSMUSG00000021910	Nisch	2.666805269	2.059531931	0.372795988	0.003264748	1
6	ENSMUSG00000073889	Il11ra1	1.877437815	1.373896952	0.450491324	0.00329826	1
6	ENSMUSG00000020160	Meis1	2.846722685	2.16744746	0.393304937	0.003414103	1
6	ENSMUSG00000024897	Apba1	2.214620432	1.460279424	0.600814998	0.003794674	1
6	ENSMUSG00000037876	Jmjd1c	3.536533297	2.573001919	0.458883312	0.004135465	1
6	ENSMUSG00000030067	Foxp1	2.526421982	1.755518135	0.52519873	0.004700204	1
6	ENSMUSG00000027799	Nbea	3.367088117	2.610545006	0.367150446	0.004841629	1
6	ENSMUSG00000063558	Aox1	1.557322312	0.964877913	0.690649251	0.005201082	1
6	ENSMUSG00000058835	Abi1	3.828889801	2.660810699	0.525060264	0.005363041	1
6	ENSMUSG00000006740	Kif5b	3.08360047	2.350971692	0.391358685	0.005800061	1
6	ENSMUSG00000020810	Cygb	2.941295337	2.232064909	0.398072672	0.005878793	1
6	ENSMUSG00000050103	Agmo	4.183037229	3.233522076	0.371444378	0.006016253	1
6	ENSMUSG00000035299	Mid1	6.134772705	4.515121613	0.442245046	0.006050649	1
6	ENSMUSG00000049439	Cyp20a1	1.363044054	0.952788516	0.516604261	0.006203739	1
6	ENSMUSG00000102368	4930590L20Rik	2.512184484	1.496135436	0.747701634	0.00662957	1
6	ENSMUSG00000004535	Tax1bp1	2.497437072	1.866720193	0.419942632	0.006893615	1
6	ENSMUSG00000030557	Mef2a	2.830716567	2.160150572	0.390035425	0.007588539	1
6	ENSMUSG00000022867	Usp25	2.066815757	1.46044576	0.501001009	0.00760846	1
6	ENSMUSG00000046402	Rbp1	1.671122888	1.242650381	0.427397376	0.007644283	1
6	ENSMUSG00000057367	Birc2	1.304382511	1.011548708	0.366801213	0.008179229	1
6	ENSMUSG00000073725	Lmbrd1	1.453504485	1.090694734	0.414288149	0.009008747	1
6	ENSMUSG00000037608	Bclaf1	2.429231203	1.804016791	0.429287039	0.009041027	1
6	ENSMUSG00000021796	Bmpr1a	2.523011244	1.962663582	0.362333733	0.00994941	1
7	ENSMUSG00000039167	Adgrl4	4.129888701	0.106570588	5.276221669	4.72E-199	1.44E-194
7	ENSMUSG00000029648	Flt1	5.172589392	0.22441713	4.526631964	1.10E-182	3.35E-178
7	ENSMUSG00000041134	Cyyr1	4.00581431	0.115072427	5.121481452	1.65E-182	5.04E-178
7	ENSMUSG00000052544	St6galnac3	1.530694489	0.048473718	4.9808398	7.61E-164	2.32E-159
7	ENSMUSG00000021108	Prkch	1.881503025	0.046076689	5.351704745	1.79E-162	5.45E-158
7	ENSMUSG00000032878	Ccdc85a	1.908952154	0.043800349	5.445694774	9.11E-151	2.78E-146
7	ENSMUSG00000055639	Dach1	3.557161111	0.10668503	5.059296667	2.71E-149	8.25E-145
7	ENSMUSG00000022623	Shank3	1.876295271	0.080296938	4.546398089	3.25E-137	9.90E-133
7	ENSMUSG00000056492	Adgrf5	2.641758963	0.178084064	3.890868517	8.40E-124	2.56E-119
7	ENSMUSG00000036617	Etl4	4.104351868	0.251376345	4.02923362	2.42E-118	7.37E-114
7	ENSMUSG00000054690	Emcn	2.606711894	0.144565521	4.172435729	3.99E-116	1.22E-111
7	ENSMUSG00000026921	Egfl7	2.173172564	0.163172848	3.735329819	1.77E-115	5.39E-111
7	ENSMUSG00000031871	Cdh5	2.434421589	0.17005684	3.839490097	4.54E-113	1.38E-108
7	ENSMUSG00000020577	Tspan13	1.375985532	0.068631898	4.325442247	4.21E-96	1.28E-91
7	ENSMUSG00000031841	Cdh13	3.789339791	0.262307087	3.852617819	2.83E-90	8.61E-86
7	ENSMUSG00000045092	S1pr1	1.433050911	0.082287363	4.122275155	2.02E-89	6.17E-85
7	ENSMUSG00000020154	Ptprb	3.33252557	0.273723612	3.605824148	1.07E-88	3.26E-84
7	ENSMUSG00000007655	Cav1	3.223133708	0.355467934	3.18067271	3.41E-83	1.04E-78
7	ENSMUSG00000062960	Kdr	2.091695994	0.188883289	3.469106212	2.00E-76	6.11E-72
7	ENSMUSG00000020717	Pecam1	3.145017829	0.288137386	3.448239429	5.43E-72	1.66E-67
7	ENSMUSG00000022579	Gpihbp1	2.131801351	0.191200719	3.478913159	2.59E-71	7.91E-67
7	ENSMUSG00000038296	Galnt18	1.455928341	0.130509945	3.479707701	5.26E-59	1.60E-54
7	ENSMUSG00000033377	Palmd	1.64662509	0.190378582	3.112569025	1.62E-51	4.92E-47
7	ENSMUSG00000002944	Cd36	10.33726683	2.001436406	2.368747107	1.97E-46	6.01E-42
7	ENSMUSG00000004655	Aqp1	2.177150335	0.262436388	3.052401357	1.10E-45	3.35E-41
7	ENSMUSG00000051177	Plcb1	3.709940308	0.463786204	2.999864165	6.54E-45	1.99E-40
7	ENSMUSG00000019966	Kitl	2.809870222	0.425012196	2.724927352	9.36E-45	2.85E-40
7	ENSMUSG00000058254	Tspan7	1.957976182	0.268573929	2.865972044	5.76E-41	1.76E-36
7	ENSMUSG00000036019	Tmtc2	2.310099034	0.246327487	3.229305172	9.93E-40	3.03E-35
7	ENSMUSG00000079018	Ly6c1	5.093169724	1.218677439	2.063247472	1.32E-32	4.02E-28
7	ENSMUSG00000022799	Arhgap31	3.720134946	0.796192897	2.224165049	8.75E-31	2.67E-26
7	ENSMUSG00000033174	Mgll	3.116143633	0.490022994	2.668840381	7.55E-30	2.30E-25
7	ENSMUSG00000024395	Lims2	2.76799443	0.689986177	2.004201675	1.35E-29	4.10E-25
7	ENSMUSG00000016087	Fli1	3.03722548	0.68857985	2.141058148	1.29E-27	3.94E-23
7	ENSMUSG00000022272	Myo10	1.877960212	0.346400974	2.438651605	8.14E-27	2.48E-22
7	ENSMUSG00000038855	Itpkb	2.63495766	0.664368987	1.987723146	1.62E-25	4.95E-21
7	ENSMUSG00000019970	Sgk1	1.383866305	0.293321581	2.238149445	3.09E-25	9.41E-21
7	ENSMUSG00000034037	Fgd5	1.217618773	0.276441489	2.139016448	3.72E-25	1.13E-20
7	ENSMUSG00000062515	Fabp4	13.71514494	4.489757375	1.611060479	4.37E-25	1.33E-20
7	ENSMUSG00000040430	Pitpnc1	2.325183888	0.648254883	1.842711743	8.62E-25	2.63E-20
7	ENSMUSG00000028184	Adgrl2	1.775291005	0.382741623	2.213612824	1.39E-23	4.24E-19
7	ENSMUSG00000056602	Fry	2.048741652	0.561056512	1.868520073	3.26E-22	9.95E-18
7	ENSMUSG00000036144	Meox2	2.534342133	0.631473068	2.004818189	1.51E-21	4.60E-17
7	ENSMUSG00000032006	Pdgfd	2.720240985	0.782722566	1.797161521	1.82E-21	5.55E-17
7	ENSMUSG00000041992	Rapgef5	2.260000149	0.495174941	2.190312655	2.01E-20	6.14E-16
7	ENSMUSG00000066842	Hmcn1	2.392301666	0.573692833	2.060048922	3.22E-20	9.81E-16
7	ENSMUSG00000045095	Magi1	2.862998517	0.793042916	1.852056077	2.46E-19	7.49E-15
7	ENSMUSG00000039831	Arhgap29	2.357749835	0.829198193	1.507621775	5.73E-18	1.75E-13
7	ENSMUSG00000020181	Nav3	1.853470689	0.397432366	2.221448028	8.74E-18	2.66E-13
7	ENSMUSG00000021745	Ptprg	6.601012632	2.266551116	1.542188661	2.52E-17	7.69E-13
7	ENSMUSG00000025006	Sorbs1	2.645335554	0.864961359	1.612743147	2.68E-17	8.17E-13
7	ENSMUSG00000045954	Cavin2	2.218359468	0.700882009	1.662249666	8.66E-17	2.64E-12
7	ENSMUSG00000037736	Limch1	2.564704034	0.91232113	1.491178712	2.04E-16	6.21E-12
7	ENSMUSG00000039943	Plcb4	3.889084225	1.3721723	1.502968831	2.84E-16	8.64E-12
7	ENSMUSG00000054720	Lrrc8c	1.667224334	0.50875167	1.712414709	2.45E-15	7.46E-11
7	ENSMUSG00000029207	Apbb2	4.105782036	1.291067159	1.669092991	9.67E-15	2.95E-10
7	ENSMUSG00000025085	Ablim1	5.564256706	2.669437617	1.059653146	1.78E-14	5.42E-10
7	ENSMUSG00000025558	Dock9	2.438495545	0.870798562	1.485580407	1.26E-13	3.84E-09
7	ENSMUSG00000026814	Eng	3.972913636	1.609793618	1.303321691	1.60E-13	4.89E-09
7	ENSMUSG00000035441	Myo1d	1.800050175	0.768897509	1.22717391	6.33E-13	1.93E-08
7	ENSMUSG00000024140	Epas1	1.964353009	0.789746519	1.314592638	1.30E-12	3.95E-08
7	ENSMUSG00000027800	Tm4sf1	4.871318498	1.649916262	1.561919508	5.50E-12	1.68E-07
7	ENSMUSG00000019647	Sema6a	2.732864545	1.079808305	1.339638737	5.60E-12	1.71E-07
7	ENSMUSG00000030313	Dennd5b	1.834190938	0.857045827	1.097699576	2.45E-11	7.48E-07
7	ENSMUSG00000008398	Elk3	1.496359659	0.531358948	1.4936983	2.62E-11	8.00E-07
7	ENSMUSG00000096054	Syne1	4.58097689	2.09641168	1.127733233	4.76E-11	1.45E-06
7	ENSMUSG00000002688	Prkd1	2.381884009	0.977778792	1.284523141	1.20E-10	3.66E-06
7	ENSMUSG00000068015	Lrch1	1.544751804	0.572839611	1.431171895	3.91E-10	1.19E-05
7	ENSMUSG00000033278	Ptprm	7.02027367	3.037762676	1.208518108	4.16E-10	1.27E-05
7	ENSMUSG00000032035	Ets1	1.862107535	0.713055079	1.384850964	4.95E-10	1.51E-05
7	ENSMUSG00000038594	Cep85l	2.236861253	1.060293986	1.077011438	6.84E-10	2.09E-05
7	ENSMUSG00000039844	Rapgef1	1.639565912	0.647346154	1.340704628	1.61E-09	4.91E-05
7	ENSMUSG00000024074	Crim1	1.904574288	0.837095734	1.186004031	2.55E-09	7.79E-05
7	ENSMUSG00000027533	Fabp5	1.770335135	0.761986638	1.216184892	5.53E-09	0.000168448
7	ENSMUSG00000061353	Cxcl12	1.699181698	0.67246793	1.33730276	1.00E-08	0.000305157
7	ENSMUSG00000053062	Jam2	2.223295807	0.894496871	1.31355157	1.69E-08	0.000515559
7	ENSMUSG00000007659	Bcl2l1	1.225539668	0.56975384	1.105006534	2.95E-08	0.000900267
7	ENSMUSG00000042284	Itga1	1.839710831	0.698399764	1.397354042	3.12E-08	0.000950439
7	ENSMUSG00000038143	Stox2	2.534001537	1.066400373	1.24866821	3.97E-08	0.001210292
7	ENSMUSG00000037815	Ctnna1	3.605143293	2.011497087	0.841786955	6.44E-08	0.001963019
7	ENSMUSG00000039031	Arhgap18	2.084455008	0.977579801	1.092383852	6.50E-08	0.001980957
7	ENSMUSG00000038145	Snrk	2.287110887	1.18563732	0.947863549	7.23E-08	0.002203306
7	ENSMUSG00000022197	Pdzd2	4.317742212	2.708729178	0.672660952	1.38E-07	0.004202417
7	ENSMUSG00000070565	Rasal2	2.8792714	1.475273121	0.964721715	1.61E-07	0.004919144
7	ENSMUSG00000020023	Tmcc3	2.927083988	1.471290896	0.992381625	1.98E-07	0.006028132
7	ENSMUSG00000022037	Clu	1.974870587	0.875073889	1.174281372	4.69E-07	0.014283749
7	ENSMUSG00000020844	Nxn	2.229894857	1.090471969	1.032023001	6.73E-07	0.020500681
7	ENSMUSG00000035168	Tanc1	1.241362445	0.59989051	1.04915329	9.68E-07	0.029490225
7	ENSMUSG00000040624	Plekhg1	1.92365027	0.955476007	1.009554982	1.10E-06	0.033489102
7	ENSMUSG00000039004	Bmp6	2.922550653	1.596431998	0.872376929	1.68E-06	0.051135131
7	ENSMUSG00000049775	Tmsb4x	6.966230123	4.607314057	0.596452189	1.83E-06	0.05583341
7	ENSMUSG00000063458	Lrmda	2.839983317	1.762199133	0.688505493	2.67E-06	0.081428756
7	ENSMUSG00000001240	Ramp2	3.220549983	1.90420448	0.758118674	2.71E-06	0.082728739
7	ENSMUSG00000071856	Mcc	3.68457419	2.162924019	0.768514917	2.76E-06	0.084221599
7	ENSMUSG00000068036	Afdn	2.858999891	1.784531379	0.679965295	4.73E-06	0.144194257
7	ENSMUSG00000066571	4931406P16Rik	1.440529665	0.847115065	0.765969518	6.12E-06	0.186417737
7	ENSMUSG00000111971	Gm48678	3.6592195	2.233844224	0.712007375	6.35E-06	0.193604006
7	ENSMUSG00000035954	Dock4	2.543722392	1.437467378	0.823412015	7.80E-06	0.237664553
7	ENSMUSG00000026482	Rgl1	1.81370112	0.967037099	0.907293591	7.85E-06	0.239112088
7	ENSMUSG00000019889	Ptprk	2.13157029	1.229575629	0.793756154	8.06E-06	0.245663249
7	ENSMUSG00000005583	Mef2c	2.479176473	1.313459518	0.916489234	1.14E-05	0.348356504
7	ENSMUSG00000068798	Rap1a	2.68312799	1.899166689	0.498549339	1.44E-05	0.438272653
7	ENSMUSG00000031618	Nr3c2	2.539760742	1.719327476	0.562848237	1.57E-05	0.477237973
7	ENSMUSG00000024242	Map4k3	1.753812908	1.015540712	0.788246777	2.07E-05	0.629841618
7	ENSMUSG00000009569	Mrtfb	1.432027906	0.694267555	1.044495949	2.21E-05	0.672875824
7	ENSMUSG00000037712	Fermt2	3.071599217	2.019264399	0.605160158	2.46E-05	0.750169767
7	ENSMUSG00000033577	Myo6	1.66059305	0.930281346	0.835959563	2.66E-05	0.811723595
7	ENSMUSG00000006304	Arpc2	1.645032207	1.063251764	0.629632581	2.75E-05	0.837459128
7	ENSMUSG00000023026	Dip2b	1.881703569	1.041115079	0.853909829	2.91E-05	0.88547039
7	ENSMUSG00000062232	Rapgef2	2.784638902	1.799063108	0.630244464	3.52E-05	1
7	ENSMUSG00000040451	Sgms1	2.389831164	1.37762588	0.794724549	3.56E-05	1
7	ENSMUSG00000070733	Fryl	1.829782762	1.145628144	0.675533538	3.81E-05	1
7	ENSMUSG00000026640	Plxna2	1.927516152	1.014523452	0.925940734	5.11E-05	1
7	ENSMUSG00000020570	Sypl	1.337901679	0.819048833	0.707950723	5.67E-05	1
7	ENSMUSG00000052632	Asap2	1.402952686	0.777747321	0.85109293	5.94E-05	1
7	ENSMUSG00000026626	Ppp2r5a	1.541479856	0.890249568	0.792034301	6.16E-05	1
7	ENSMUSG00000026883	Dab2ip	1.480643831	0.935787373	0.661971975	6.55E-05	1
7	ENSMUSG00000020015	Cdk17	1.26720647	0.705605476	0.844717943	6.69E-05	1
7	ENSMUSG00000046718	Bst2	2.169136069	1.584257845	0.453313396	7.10E-05	1
7	ENSMUSG00000019302	Atp6v0a1	1.210097105	0.713101421	0.762943637	7.77E-05	1
7	ENSMUSG00000030660	Pik3c2a	1.516894801	0.96617362	0.650766669	8.78E-05	1
7	ENSMUSG00000001089	Luzp1	2.209211245	1.369808902	0.689556735	0.000102639	1
7	ENSMUSG00000030516	Tjp1	2.087368969	1.334325133	0.645575389	0.000110335	1
7	ENSMUSG00000054808	Actn4	1.366656686	0.887587519	0.622689587	0.000117469	1
7	ENSMUSG00000020044	Timp3	6.0217471	4.523537322	0.412730745	0.000138735	1
7	ENSMUSG00000054404	Slfn5	2.424497368	1.442628784	0.748985573	0.000181213	1
7	ENSMUSG00000022307	Oxr1	2.082735572	1.246286664	0.740843737	0.00020199	1
7	ENSMUSG00000004951	Hspb1	2.019673353	1.427481011	0.500650427	0.000216984	1
7	ENSMUSG00000006386	Tek	2.62775693	1.793706894	0.55088767	0.000217701	1
7	ENSMUSG00000027684	Mecom	12.13863112	8.802056848	0.463693143	0.000225125	1
7	ENSMUSG00000035242	Oaz1	3.786604027	2.77110629	0.450442515	0.000234553	1
7	ENSMUSG00000026414	Tnnt2	28.08368645	21.63618414	0.376286245	0.000236312	1
7	ENSMUSG00000031996	Aplp2	4.874656294	3.452472234	0.497670688	0.000237387	1
7	ENSMUSG00000020176	Grb10	3.056694441	2.130243396	0.520954064	0.000239571	1
7	ENSMUSG00000033209	Ttc28	4.071318125	3.076764396	0.404081982	0.000332853	1
7	ENSMUSG00000027309	4930402H24Rik	2.185897387	1.625717974	0.427148674	0.000368721	1
7	ENSMUSG00000022607	Ptk2	2.974334476	1.896029562	0.649585435	0.000369763	1
7	ENSMUSG00000031461	Myom2	2.173583319	1.363167505	0.673112548	0.000398719	1
7	ENSMUSG00000021771	Vdac2	2.065270368	1.30455817	0.662769384	0.000410958	1
7	ENSMUSG00000019820	Utrn	4.235566806	2.899750077	0.546626482	0.000438734	1
7	ENSMUSG00000025810	Nrp1	4.548903273	3.12692488	0.540774197	0.00044241	1
7	ENSMUSG00000026222	Sp100	2.166484993	1.439939455	0.589348091	0.000526789	1
7	ENSMUSG00000025860	Xiap	1.596301154	1.029115822	0.633327492	0.000570817	1
7	ENSMUSG00000044340	Phlpp1	2.340496214	1.487658075	0.653771458	0.000605943	1
7	ENSMUSG00000008730	Hipk1	1.183742624	0.869717349	0.444736919	0.000641544	1
7	ENSMUSG00000032249	Anp32a	1.093931801	0.766676188	0.512833522	0.000688188	1
7	ENSMUSG00000005417	Mprip	2.69511701	1.901880789	0.50292109	0.000781114	1
7	ENSMUSG00000022587	Ly6e	4.083363422	3.165049914	0.367529722	0.000781697	1
7	ENSMUSG00000028849	Map7d1	1.240421213	0.811213266	0.612676954	0.000850624	1
7	ENSMUSG00000028161	Ppp3ca	5.018118605	3.62244281	0.470183656	0.000864082	1
7	ENSMUSG00000006932	Ctnnb1	1.449409949	0.978996904	0.566089501	0.000930914	1
7	ENSMUSG00000020859	Spag9	5.087779263	3.847375073	0.403161598	0.000956257	1
7	ENSMUSG00000007872	Id3	1.701663744	1.125701553	0.596121593	0.001010111	1
7	ENSMUSG00000020640	Itsn2	2.360334709	1.627665325	0.536187369	0.001033264	1
7	ENSMUSG00000038239	Hrc	1.903839615	1.300459801	0.549890143	0.001215216	1
7	ENSMUSG00000021843	Ktn1	3.809530523	2.900029547	0.393545615	0.001262127	1
7	ENSMUSG00000031627	Irf2	1.809138097	1.214110977	0.575402239	0.001262699	1
7	ENSMUSG00000020841	Cpd	1.453336391	0.994547545	0.547256423	0.001342007	1
7	ENSMUSG00000031633	Slc25a4	22.2768615	17.15488289	0.376926715	0.001376284	1
7	ENSMUSG00000055148	Klf2	2.578354942	1.663075581	0.632597146	0.001419978	1
7	ENSMUSG00000025488	Cox8b	6.173238833	4.70313058	0.39240622	0.001426872	1
7	ENSMUSG00000030067	Foxp1	2.75997043	1.759819515	0.649225335	0.001440717	1
7	ENSMUSG00000021224	Numb	1.974601175	1.456459298	0.439095906	0.001512343	1
7	ENSMUSG00000052713	Zfp608	1.359297916	0.84706617	0.682315107	0.001590668	1
7	ENSMUSG00000061232	H2-K1	5.607926414	4.118563789	0.445326085	0.001818752	1
7	ENSMUSG00000001175	Calm1	2.57588106	1.894258462	0.443432786	0.001829118	1
7	ENSMUSG00000097546	Gm26749	1.248348075	0.854351985	0.54711778	0.001861588	1
7	ENSMUSG00000030869	Ndufab1	5.682347983	4.067806635	0.482236082	0.001906052	1
7	ENSMUSG00000039316	Rftn1	1.491530695	1.065483731	0.485285103	0.002074418	1
7	ENSMUSG00000074364	Ehd2	1.189996513	0.778065943	0.612993009	0.0021287	1
7	ENSMUSG00000037710	Cisd1	2.012285524	1.510364951	0.413937833	0.00213311	1
7	ENSMUSG00000011257	Pabpc4	1.053713038	0.76705182	0.458086075	0.002145906	1
7	ENSMUSG00000032560	Dnajc13	1.326870088	0.846096823	0.649132453	0.002153235	1
7	ENSMUSG00000053580	Tanc2	1.816403283	1.178237884	0.624453703	0.002354806	1
7	ENSMUSG00000034898	Filip1	1.278428399	0.863842774	0.565530703	0.00241805	1
7	ENSMUSG00000029705	Cux1	1.78641607	1.296789209	0.462124143	0.002427851	1
7	ENSMUSG00000023010	Tmbim6	2.260532846	1.609060739	0.490444094	0.002733368	1
7	ENSMUSG00000029484	Anxa3	1.467776728	1.021152438	0.523434279	0.002791549	1
7	ENSMUSG00000030557	Mef2a	3.234540964	2.159022625	0.583182622	0.002800285	1
7	ENSMUSG00000040940	Arhgef1	1.215017071	0.840940428	0.530901076	0.002887974	1
7	ENSMUSG00000019802	Sec63	2.441596826	1.877854032	0.378740067	0.002896179	1
7	ENSMUSG00000057738	Sptan1	3.200540507	2.091136051	0.61402864	0.002936275	1
7	ENSMUSG00000027763	Mbnl1	4.877720102	3.667601025	0.411370269	0.003101501	1
7	ENSMUSG00000038733	Wdr26	1.503691595	1.147914028	0.389494106	0.003168344	1
7	ENSMUSG00000022010	Tsc22d1	1.526116778	0.963648167	0.663286949	0.003203895	1
7	ENSMUSG00000072294	Klf12	2.969756375	2.051439415	0.533708036	0.003221656	1
7	ENSMUSG00000040651	Tasor	2.729874111	1.980462445	0.462997078	0.003290753	1
7	ENSMUSG00000035248	Tut7	1.678142419	1.199619388	0.484288414	0.003306647	1
7	ENSMUSG00000070544	Top1	3.281019231	2.317772639	0.501404997	0.003357409	1
7	ENSMUSG00000022443	Myh9	1.472858637	0.943722628	0.642184169	0.003370988	1
7	ENSMUSG00000022781	Pak2	2.052414225	1.528828909	0.424894966	0.003471172	1
7	ENSMUSG00000045671	Spred2	1.339285082	0.869192889	0.623714811	0.003505919	1
7	ENSMUSG00000027030	Stk39	1.588654335	1.0719021	0.567632106	0.00391689	1
7	ENSMUSG00000090272	Mndal	2.000848079	1.44220663	0.47233375	0.004086719	1
7	ENSMUSG00000009647	Mcu	1.9988192	1.180772959	0.759416394	0.004116448	1
7	ENSMUSG00000020902	Ntn1	1.9662189	1.403911242	0.485972218	0.004383516	1
7	ENSMUSG00000031207	Msn	1.377195072	0.961028066	0.519082454	0.004534693	1
7	ENSMUSG00000026260	Ndufa10	1.973911492	1.396989817	0.498735798	0.004564429	1
7	ENSMUSG00000028382	Ptbp3	1.761527991	1.308666288	0.428730145	0.004598341	1
7	ENSMUSG00000037242	Clic4	2.346121925	1.676200591	0.485083183	0.004759911	1
7	ENSMUSG00000042079	Hnrnpf	1.505739452	1.137516716	0.404584407	0.005128901	1
7	ENSMUSG00000031010	Usp9x	2.743139278	2.106839135	0.380747711	0.005331485	1
7	ENSMUSG00000019806	Aig1	1.466701133	1.10290153	0.411270936	0.005490974	1
7	ENSMUSG00000063450	Syne2	2.686319532	1.992142113	0.431310352	0.005657578	1
7	ENSMUSG00000046230	Vps13a	1.658627729	1.146741755	0.532449582	0.00568235	1
7	ENSMUSG00000061315	Naca	2.431030118	1.887352922	0.365203544	0.005851311	1
7	ENSMUSG00000022186	Oxct1	2.77509565	2.082663202	0.414107945	0.005856734	1
7	ENSMUSG00000038372	Gmds	2.688226537	1.922696334	0.483523794	0.006170212	1
7	ENSMUSG00000024066	Xdh	3.785891279	2.742575364	0.465101715	0.006497225	1
7	ENSMUSG00000021036	Sptlc2	1.218893674	0.912798097	0.417204593	0.006795612	1
7	ENSMUSG00000004044	Cavin1	1.423089752	0.934722048	0.606417325	0.007109053	1
7	ENSMUSG00000024248	Cox7a2l	1.638493678	1.190540728	0.460753131	0.007426259	1
7	ENSMUSG00000026490	Cdc42bpa	2.613938369	1.933022138	0.435366966	0.007563422	1
7	ENSMUSG00000039671	Zmynd8	1.258324693	0.879514128	0.516725581	0.007582749	1
7	ENSMUSG00000021027	Ralgapa1	3.202172567	2.419864107	0.404125025	0.008337532	1
7	ENSMUSG00000018326	Ywhab	1.572232649	1.148660001	0.452862885	0.008479085	1
7	ENSMUSG00000023460	Rab12	1.262369928	0.936702226	0.430472344	0.00872671	1
7	ENSMUSG00000027198	Ext2	1.307201848	0.914822273	0.514918531	0.008856997	1
7	ENSMUSG00000016382	Pls3	1.409894212	0.927060895	0.604850905	0.008887832	1
7	ENSMUSG00000062078	Qk	5.128113439	3.882096915	0.401592041	0.009126563	1
7	ENSMUSG00000033713	Foxn3	3.253735971	2.339238037	0.476058511	0.009719731	1
7	ENSMUSG00000042446	Zmym4	1.976968866	1.517108574	0.381965813	0.009753804	1
7	ENSMUSG00000034390	Cmip	1.712275649	1.073929082	0.673016244	0.009923938	1
8	ENSMUSG00000028033	Kcnq5	7.940410646	0.013459189	9.204478309	0	0
8	ENSMUSG00000020218	Wif1	5.778068829	0.015717998	8.522026147	0	0
8	ENSMUSG00000062209	Erbb4	39.00379361	0.228479719	7.415404534	0	0
8	ENSMUSG00000063142	Kcnma1	7.174293447	0.072634909	6.626029865	0	0
8	ENSMUSG00000036218	Pdzrn4	13.7256011	0.068239142	7.652054103	1.02E-298	3.12E-294
8	ENSMUSG00000030772	Dkk3	13.35143195	0.375094425	5.15359685	8.38E-243	2.55E-238
8	ENSMUSG00000032076	Cadm1	4.548210755	0.100799436	5.495739632	1.39E-208	4.25E-204
8	ENSMUSG00000006014	Prg4	16.77261032	0.347251008	5.593984542	2.98E-201	9.08E-197
8	ENSMUSG00000041559	Fmod	4.359230391	0.059865219	6.186211595	7.71E-163	2.35E-158
8	ENSMUSG00000026051	Ecrg4	4.42160434	0.106349347	5.37768685	2.78E-161	8.48E-157
8	ENSMUSG00000031849	Comp	10.7192343	0.291379865	5.201156854	1.89E-153	5.77E-149
8	ENSMUSG00000025776	Crispld1	2.414971459	0.05822428	5.374241426	1.45E-142	4.41E-138
8	ENSMUSG00000051177	Plcb1	6.808422928	0.416152415	4.032136745	2.87E-107	8.75E-103
8	ENSMUSG00000051910	Sox6	6.69214941	0.467493922	3.839450141	5.65E-101	1.72E-96
8	ENSMUSG00000038168	P3h2	3.937120308	0.188665099	4.383241331	7.63E-95	2.33E-90
8	ENSMUSG00000027750	Postn	9.767663566	0.813605542	3.585612098	1.15E-94	3.50E-90
8	ENSMUSG00000019880	Rspo3	2.264675051	0.08316839	4.767124942	2.21E-94	6.75E-90
8	ENSMUSG00000031189	Aff2	4.286569021	0.377667711	3.504634023	5.59E-70	1.70E-65
8	ENSMUSG00000031673	Cdh11	4.425591257	0.254619612	4.11945476	9.83E-68	3.00E-63
8	ENSMUSG00000040152	Thbs1	8.195183577	0.478900457	4.096978549	1.55E-53	4.73E-49
8	ENSMUSG00000002020	Ltbp2	2.823326972	0.206377405	3.774039287	4.32E-52	1.32E-47
8	ENSMUSG00000062329	Cytl1	5.564310014	0.309626373	4.167602534	7.70E-49	2.35E-44
8	ENSMUSG00000029123	Stk32b	2.514223624	0.162577274	3.950915469	8.26E-43	2.52E-38
8	ENSMUSG00000001768	Rin2	10.42321126	1.325934168	2.974718768	1.88E-39	5.72E-35
8	ENSMUSG00000035357	Pdzrn3	7.636652898	1.429237816	2.41769446	5.14E-39	1.57E-34
8	ENSMUSG00000042807	Hecw2	3.235565531	0.357968248	3.176114367	1.38E-38	4.20E-34
8	ENSMUSG00000031273	Col4a6	3.659892889	0.594395582	2.62230613	1.51E-38	4.59E-34
8	ENSMUSG00000021458	Aopep	11.04134647	2.657697846	2.054667118	3.94E-37	1.20E-32
8	ENSMUSG00000052387	Trpm3	1.793588901	0.233850287	2.939192151	2.84E-36	8.66E-32
8	ENSMUSG00000041482	Piezo2	1.661391265	0.335280492	2.308951424	5.10E-36	1.55E-31
8	ENSMUSG00000028456	Unc13b	1.793307868	0.230973272	2.956825367	2.34E-34	7.14E-30
8	ENSMUSG00000021699	Pde4d	13.69328267	1.679374891	3.027472115	6.30E-34	1.92E-29
8	ENSMUSG00000034463	Scara3	2.054827881	0.214813064	3.257863914	5.51E-32	1.68E-27
8	ENSMUSG00000035258	Abi3bp	15.73925168	3.697909192	2.089585247	2.56E-30	7.79E-26
8	ENSMUSG00000035441	Myo1d	3.937208325	0.730858462	2.429509104	2.36E-27	7.19E-23
8	ENSMUSG00000027931	Npr1	1.474851589	0.21173693	2.800224964	5.48E-26	1.67E-21
8	ENSMUSG00000029765	Plxna4	2.124911687	0.377129753	2.494270003	5.82E-26	1.77E-21
8	ENSMUSG00000020627	Klhl29	2.309592322	0.319749202	2.852625555	9.45E-26	2.88E-21
8	ENSMUSG00000031636	Pdlim3	5.431840279	0.975852139	2.476706586	4.27E-25	1.30E-20
8	ENSMUSG00000046169	Adamts6	3.802182045	0.685585658	2.471418774	2.27E-24	6.92E-20
8	ENSMUSG00000028289	Epha7	1.992633312	0.356591501	2.482332026	5.74E-23	1.75E-18
8	ENSMUSG00000024998	Plce1	5.686929803	1.857597715	1.614211893	5.01E-22	1.53E-17
8	ENSMUSG00000019990	Pde7b	7.797643455	1.334961456	2.546240102	1.41E-21	4.30E-17
8	ENSMUSG00000021779	Thrb	6.083360272	1.191251466	2.352390457	5.56E-21	1.69E-16
8	ENSMUSG00000042942	Greb1l	5.189633778	1.146088292	2.178914543	4.23E-20	1.29E-15
8	ENSMUSG00000029838	Ptn	2.470783952	0.437618681	2.497222637	1.27E-19	3.87E-15
8	ENSMUSG00000060843	Ctnna3	4.545208514	1.03331031	2.137072911	1.85E-19	5.65E-15
8	ENSMUSG00000053580	Tanc2	4.932473705	1.119061547	2.140021975	5.36E-18	1.63E-13
8	ENSMUSG00000037852	Cpe	2.24461873	0.390228909	2.524077844	3.57E-17	1.09E-12
8	ENSMUSG00000021010	Npas3	2.257737132	0.647732459	1.801407576	5.98E-16	1.82E-11
8	ENSMUSG00000031930	Wwp2	1.651685967	0.324528566	2.347522036	8.82E-16	2.69E-11
8	ENSMUSG00000087475	4933406I18Rik	1.892382164	0.391937301	2.271508683	1.07E-15	3.26E-11
8	ENSMUSG00000028266	Lmo4	2.94368844	0.728090986	2.015434331	1.13E-15	3.44E-11
8	ENSMUSG00000036158	Prickle1	4.491042501	1.711964422	1.391397655	2.13E-13	6.48E-09
8	ENSMUSG00000096054	Syne1	5.836376664	2.08213069	1.487012368	2.58E-13	7.87E-09
8	ENSMUSG00000022037	Clu	3.769078826	0.844143747	2.158651369	6.42E-13	1.96E-08
8	ENSMUSG00000004151	Etv1	3.454235436	0.910297844	1.92395585	1.18E-12	3.59E-08
8	ENSMUSG00000025780	Itih5	4.785228071	1.198835336	1.996954174	1.42E-12	4.32E-08
8	ENSMUSG00000059921	Unc5c	2.223923658	0.619290029	1.844420143	1.65E-12	5.02E-08
8	ENSMUSG00000020044	Timp3	11.27475775	4.425591897	1.349154111	2.86E-12	8.71E-08
8	ENSMUSG00000027210	Meis2	8.303991999	2.889200157	1.5231349	8.63E-12	2.63E-07
8	ENSMUSG00000038305	Spats2l	1.836249377	0.567149759	1.694960358	1.90E-11	5.78E-07
8	ENSMUSG00000048612	Myof	2.731775445	0.967796756	1.497062889	2.06E-11	6.28E-07
8	ENSMUSG00000038244	Mical2	1.865656844	0.546057075	1.772559995	2.79E-11	8.51E-07
8	ENSMUSG00000026768	Itga8	1.942452744	0.597320313	1.701302811	6.72E-11	2.05E-06
8	ENSMUSG00000026335	Pam	14.65395981	8.007091558	0.871940356	7.26E-11	2.21E-06
8	ENSMUSG00000041112	Elmo1	8.236827307	3.469490072	1.247365103	7.77E-11	2.37E-06
8	ENSMUSG00000031965	Tbx20	10.80466002	4.102243132	1.397168772	8.11E-11	2.47E-06
8	ENSMUSG00000031595	Pdgfrl	1.955950441	0.681331517	1.521440967	9.08E-11	2.77E-06
8	ENSMUSG00000025006	Sorbs1	2.975379859	0.866044584	1.780560664	9.71E-11	2.96E-06
8	ENSMUSG00000018363	Smurf2	3.683454032	1.572669891	1.227843363	1.17E-10	3.57E-06
8	ENSMUSG00000069769	Msi2	4.465013708	1.618359015	1.464132916	1.58E-10	4.80E-06
8	ENSMUSG00000016087	Fli1	1.89350796	0.721385147	1.392219863	1.60E-10	4.87E-06
8	ENSMUSG00000066842	Hmcn1	1.858980938	0.59209492	1.650611596	1.89E-10	5.75E-06
8	ENSMUSG00000030557	Mef2a	4.81225563	2.132289937	1.17430966	4.90E-10	1.49E-05
8	ENSMUSG00000027684	Mecom	16.34002526	8.732896657	0.903878041	6.13E-10	1.87E-05
8	ENSMUSG00000030064	Frmd4b	2.903213648	1.045469159	1.47350024	1.01E-09	3.08E-05
8	ENSMUSG00000026728	Vim	11.16968067	4.885288602	1.193072243	1.15E-09	3.51E-05
8	ENSMUSG00000025880	Smad7	2.154473619	0.735810125	1.549930001	1.92E-09	5.84E-05
8	ENSMUSG00000019997	Ccn2	4.098723731	1.407237243	1.542309181	2.27E-09	6.91E-05
8	ENSMUSG00000022799	Arhgap31	2.548722962	0.832017557	1.615088689	2.53E-09	7.71E-05
8	ENSMUSG00000041577	Prelp	9.488260153	3.460886768	1.455001826	3.83E-09	0.000116645
8	ENSMUSG00000032038	St3gal4	4.365720693	1.511724182	1.530024893	8.75E-09	0.000266664
8	ENSMUSG00000052920	Prkg1	15.42640497	8.057025967	0.93708258	1.04E-08	0.000316268
8	ENSMUSG00000022665	Ccdc80	22.13390629	10.29327083	1.104556595	1.19E-08	0.000363262
8	ENSMUSG00000029563	Foxp2	11.05054416	5.979599798	0.885996578	1.31E-08	0.000398107
8	ENSMUSG00000040270	Bach2	2.301723929	0.856039831	1.426964975	1.38E-08	0.000421655
8	ENSMUSG00000037736	Limch1	2.430184015	0.922085769	1.398092704	1.67E-08	0.000509097
8	ENSMUSG00000015133	Lrrk1	5.131233775	1.985990225	1.369447233	2.58E-08	0.000787065
8	ENSMUSG00000020023	Tmcc3	3.409687649	1.467949766	1.215836985	2.81E-08	0.000857316
8	ENSMUSG00000051586	Mical3	1.296857567	0.557110373	1.218984955	1.33E-07	0.004041813
8	ENSMUSG00000008575	Nfib	12.39287271	7.91278948	0.647252368	1.92E-07	0.005855658
8	ENSMUSG00000038372	Gmds	3.769320809	1.904500901	0.984891618	2.17E-07	0.006611079
8	ENSMUSG00000045095	Magi1	2.295868728	0.813195519	1.497365984	2.64E-07	0.008037087
8	ENSMUSG00000038679	Trps1	13.56109075	7.471827934	0.859940086	4.70E-07	0.014310143
8	ENSMUSG00000024899	Papss2	3.346415424	1.178912997	1.505159301	4.79E-07	0.014599724
8	ENSMUSG00000078515	Ddi2	2.590302387	0.954264225	1.440659833	6.04E-07	0.018413146
8	ENSMUSG00000026721	Rabgap1l	5.321061534	2.557553515	1.056949659	7.72E-07	0.023521894
8	ENSMUSG00000033713	Foxn3	3.949419282	2.329339933	0.761719341	1.36E-06	0.041491497
8	ENSMUSG00000026365	Cfh	32.80415058	20.22263954	0.697907049	1.36E-06	0.041578715
8	ENSMUSG00000021338	Carmil1	2.637040329	1.076987952	1.291917524	2.25E-06	0.068568811
8	ENSMUSG00000022883	Robo1	3.488965132	1.590391369	1.133417347	2.41E-06	0.073587147
8	ENSMUSG00000024913	Lrp5	1.932741586	0.728427357	1.407791747	2.43E-06	0.074011722
8	ENSMUSG00000032228	Tcf12	8.046801424	4.225595955	0.929260605	2.65E-06	0.080909872
8	ENSMUSG00000030691	Fchsd2	3.702343551	1.866245233	0.988300198	3.01E-06	0.091621866
8	ENSMUSG00000015755	Tab2	1.266330735	0.651873233	0.957990909	6.45E-06	0.196584948
8	ENSMUSG00000050315	Synpo2	1.870275841	0.759215624	1.300669477	7.28E-06	0.221913277
8	ENSMUSG00000032340	Neo1	1.760713373	0.737537344	1.255372067	8.66E-06	0.26379762
8	ENSMUSG00000039943	Plcb4	2.801642092	1.404581597	0.996132226	8.86E-06	0.269971977
8	ENSMUSG00000059263	Usp47	3.118765795	1.57481178	0.985795808	9.20E-06	0.280269841
8	ENSMUSG00000042436	Mfap4	2.368768064	1.195329791	0.986728232	1.19E-05	0.362401628
8	ENSMUSG00000007613	Tgfbr1	3.318608945	1.730296322	0.939559508	1.66E-05	0.505857333
8	ENSMUSG00000017969	Ptgis	5.145002878	2.644769321	0.960029989	1.80E-05	0.549225645
8	ENSMUSG00000026469	Xpr1	1.647061952	0.709584918	1.21484757	1.83E-05	0.558625654
8	ENSMUSG00000024548	Setbp1	6.549391917	3.490506041	0.907924757	2.61E-05	0.796976917
8	ENSMUSG00000024544	Ldlrad4	8.496354429	4.449534304	0.933189601	2.68E-05	0.816948837
8	ENSMUSG00000074971	Fibin	4.228090481	1.416015983	1.578168701	2.86E-05	0.87218967
8	ENSMUSG00000031618	Nr3c2	3.44829675	1.704796352	1.016284523	2.92E-05	0.889114787
8	ENSMUSG00000111462	Gm49317	11.48499376	7.709172381	0.57510218	3.32E-05	1
8	ENSMUSG00000040118	Cacna2d1	4.456498493	2.527107837	0.81842339	3.41E-05	1
8	ENSMUSG00000028525	Pde4b	2.886176021	1.171707244	1.300547138	3.47E-05	1
8	ENSMUSG00000024805	Pcgf5	1.812140384	0.897869439	1.013117143	3.84E-05	1
8	ENSMUSG00000053819	Camk2d	4.595211828	2.927863782	0.650282934	4.12E-05	1
8	ENSMUSG00000035770	Dync1li2	1.461282681	0.640623107	1.189687549	4.38E-05	1
8	ENSMUSG00000016382	Pls3	1.801231957	0.921357395	0.967151187	4.42E-05	1
8	ENSMUSG00000028532	Cachd1	1.512760144	0.714514952	1.082147152	5.68E-05	1
8	ENSMUSG00000064345	mt-Nd2	26.19274613	19.1053857	0.455187941	6.28E-05	1
8	ENSMUSG00000062604	Srpk2	3.108382949	1.572983442	0.982660768	7.07E-05	1
8	ENSMUSG00000055980	Irs1	1.999982639	0.883427274	1.178804199	8.12E-05	1
8	ENSMUSG00000020262	Adarb1	2.034532878	0.967275561	1.072698742	8.42E-05	1
8	ENSMUSG00000030465	Psd3	9.178962216	4.901083396	0.905230355	8.63E-05	1
8	ENSMUSG00000024143	Rhoq	2.566982844	1.494721546	0.780196906	8.70E-05	1
8	ENSMUSG00000002985	Apoe	40.05335893	24.33004351	0.719184334	9.36E-05	1
8	ENSMUSG00000027878	Notch2	2.86249468	1.366743848	1.06653013	0.000136889	1
[truncated: 253 more rows]
