# Supplementary material for: Single-cell RNA-seq of heart reveals intercellular communication drivers of myocardial fibrosis in diabetic cardiomyopathy
Source: eLife. 2023 Apr 3;12:e80479. doi: 10.7554/eLife.80479 (PMC10110238; doi:10.7554/eLife.80479)
Supplement: Supplementary file 17. [file elife-80479-supp17.xls]

Supplementary file 17: The transcription-factor gene-regulatory networks in the distinct subpopulations
id	Firbo_0	Firbo_1	Firbo_2	Firbo_3	Firbo_4	Firbo_5	Firbo_6	Firbo_7	Firbo_8	Firbo_9
Thra_extended (39g)	0.255399938	0.159630358	0.240479156	0.234483882	0.217914704	0.232970811	0.221829859	0.221897652	0.195319269	0.200864298
Nfe2l1_extended (46g)	0.16362202	0.143599638	0.169330646	0.209485488	0.145256917	0.185762388	0.146912896	0.175835093	0.16338516	0.157794523
Hmgb1_extended (41g)	0.133679293	0.119483891	0.156331273	0.180143408	0.1218741	0.172113788	0.14058544	0.143343677	0.155250103	0.135114817
Creb5_extended (30g)	0.091133137	0.107433754	0.184404706	0.079605766	0.117018006	0.140216022	0.093003611	0.11523192	0.092772395	0.116228099
Tcf4_extended (26g)	0.295611594	0.339373165	0.255166861	0.176485418	0.251998344	0.29452643	0.268718609	0.261508741	0.245906176	0.331017115
Foxp2_extended (60g)	0.131237494	0.145009496	0.110678782	0.087508871	0.189854115	0.124240805	0.178399922	0.131393052	0.189629433	0.123882599
Sp3_extended (603g)	0.423677062	0.444229148	0.419430057	0.319702306	0.437568513	0.41207789	0.430134089	0.394300459	0.422547179	0.437253132
Bclaf1_extended (608g)	0.379579839	0.414035833	0.377156451	0.294620077	0.410054805	0.368586691	0.405752268	0.370807361	0.401591196	0.401033413
Cux1_extended (282g)	0.120017872	0.144956988	0.132915573	0.103226106	0.139976376	0.137175094	0.142607839	0.126275551	0.152911722	0.140760569
Foxn3_extended (91g)	0.117011158	0.137699138	0.103716933	0.079250673	0.144274959	0.111900794	0.139948451	0.120683133	0.158934639	0.126499208
Elf1_extended (340g)	0.161815644	0.191195718	0.170621211	0.128471471	0.18994227	0.166279323	0.191909266	0.170268662	0.196434825	0.184493948
Tcf12_extended (18g)	0.233006324	0.27002002	0.229325399	0.143897256	0.252358603	0.215294034	0.254391314	0.234321283	0.300514478	0.257955903
Klf13_extended (24g)	0.044994741	0.046968652	0.049504764	0.049172847	0.044470136	0.047659623	0.051723028	0.048206374	0.050423995	0.049496174
Mef2a_extended (15g)	0.056657499	0.077408131	0.059905731	0.067602796	0.066582492	0.076909755	0.079257229	0.087289509	0.101907363	0.080481064
