# Supplementary material for: Single-cell RNA-seq of heart reveals intercellular communication drivers of myocardial fibrosis in diabetic cardiomyopathy
Source: eLife. 2023 Apr 3;12:e80479. doi: 10.7554/eLife.80479 (PMC10110238; doi:10.7554/eLife.80479)
Supplement: Supplementary file 18. [file elife-80479-supp18.xls]

Supplementary file 18: Gene-expression of the transcription factors shown in Figure 5A and B
GeneID	GeneName	Firbo_0	Firbo_1	Firbo_2	Firbo_3	Firbo_4	Firbo_5	Firbo_6	Firbo_7	Firbo_8	Firbo_9
ENSMUSG00000058756	Thra	1.585604499	1.442962009	1.549263806	1.259174668	1.253992858	1.221053492	1.463872421	1.299248111	1.272313374	1.246148629
ENSMUSG00000038615	Nfe2l1	1.831806945	1.703412191	2.122689644	2.973411011	1.858016681	2.022145272	2.185416581	2.099328655	1.387779127	2.571739447
ENSMUSG00000066551	Hmgb1	2.304070998	2.151161799	2.327836663	2.903063841	1.607518478	2.723957243	2.315383777	1.984867434	2.514780118	1.778500145
ENSMUSG00000053007	Creb5	1.843496712	2.634766519	4.892171454	1.429586649	4.472438324	2.395449269	0.865999228	2.984782516	1.996167517	2.366652414
ENSMUSG00000053477	Tcf4	10.16772353	13.70705212	8.759477533	7.267386297	7.028583287	10.42551271	6.041924907	11.06755286	8.639476581	12.08945491
ENSMUSG00000029563	Foxp2	5.793508714	6.401386119	4.736050303	4.06940332	11.32404637	6.09299676	9.591402494	4.543482114	11.05054416	5.522425039
ENSMUSG00000027109	Sp3	1.617660011	1.799461034	1.468868049	1.196793391	1.28189413	1.190187574	1.42922568	1.208535291	0.78660383	1.82644972
ENSMUSG00000037608	Bclaf1	1.846258953	2.009042217	1.612911629	1.379023235	1.812164478	1.415465153	2.429231203	1.777922235	2.232400608	2.191653571
ENSMUSG00000029705	Cux1	1.161028305	1.433837609	1.412326249	1.148554093	1.1487886	1.508736272	0.998490427	1.78641607	1.6328359	1.138983528
ENSMUSG00000033713	Foxn3	2.151918977	2.528110743	2.070459856	2.019851851	3.021488958	2.319142323	2.584617867	3.253735971	3.949419282	2.715041214
ENSMUSG00000036461	Elf1	1.580759396	1.684466053	1.958610766	0.92864731	1.323293711	1.500606422	1.570325506	1.704253587	1.004291911	1.636169685
ENSMUSG00000032228	Tcf12	4.069053313	4.857884309	4.16474211	2.58358507	4.537184724	3.699780208	4.564166479	4.762426428	8.046801424	4.589453786
ENSMUSG00000052040	Klf13	1.368860174	1.415013261	1.490723091	0.913961179	1.393688161	1.508595909	1.327740165	1.427890818	1.093545432	0.993552957
ENSMUSG00000030557	Mef2a	1.810069271	2.27692711	2.099113336	1.923191639	2.313374375	2.377058144	2.830716567	3.234540964	4.81225563	2.56466031
