# Supplementary material for: Single-cell RNA-seq of heart reveals intercellular communication drivers of myocardial fibrosis in diabetic cardiomyopathy
Source: eLife. 2023 Apr 3;12:e80479. doi: 10.7554/eLife.80479 (PMC10110238; doi:10.7554/eLife.80479)
Supplement: Supplementary file 19. [file elife-80479-supp19.xls]

Supplementary file 19: Genes with significant transcriptomic changes in each fibroblast subpopulation
Cluster	GeneID	GeneName	Control	T2DM	cells.1	cells.2	pct.1	pct.2	log2FC	p_value	p_val_adjust	significance
FB_Cluster_0	ENSMUSG00000059741	Myl3	30.71596175	9.493558271	1078	775	0.996	0.894	-1.693957228	9.68E-257	2.95E-252	down
FB_Cluster_0	ENSMUSG00000032366	Tpm1	41.07538064	15.07385684	1078	775	0.998	0.968	-1.44621929	9.28E-239	2.83E-234	down
FB_Cluster_0	ENSMUSG00000026414	Tnnt2	26.85559458	8.599548075	1078	775	0.989	0.889	-1.642878509	6.99E-229	2.13E-224	down
FB_Cluster_0	ENSMUSG00000013936	Myl2	28.51027012	10.84466485	1078	775	0.994	0.937	-1.394487997	4.81E-200	1.47E-195	down
FB_Cluster_0	ENSMUSG00000035458	Tnni3	25.73594124	9.17825774	1078	775	0.992	0.888	-1.487482209	3.48E-196	1.06E-191	down
FB_Cluster_0	ENSMUSG00000068614	Actc1	15.9202712	6.326391663	1078	775	0.934	0.801	-1.33139639	3.62E-122	1.10E-117	down
FB_Cluster_0	ENSMUSG00000031633	Slc25a4	19.44137007	8.557001029	1078	775	0.978	0.861	-1.183943284	3.11E-120	9.47E-116	down
FB_Cluster_0	ENSMUSG00000091898	Tnnc1	11.66931509	4.084810749	1078	775	0.889	0.625	-1.514355788	7.43E-112	2.27E-107	down
FB_Cluster_0	ENSMUSG00000002289	Angptl4	0.167223189	2.423160223	1078	775	0.031	0.443	3.85624003	1.23E-111	3.76E-107	up
FB_Cluster_0	ENSMUSG00000018893	Mb	19.83770495	9.590937248	1078	775	0.968	0.908	-1.048493647	2.38E-104	7.26E-100	down
FB_Cluster_0	ENSMUSG00000030785	Cox6a2	16.1498613	7.466095134	1078	775	0.938	0.839	-1.113085588	8.48E-97	2.58E-92	down
FB_Cluster_0	ENSMUSG00000032060	Cryab	9.914029954	3.972854859	1078	775	0.852	0.622	-1.319273768	3.55E-85	1.08E-80	down
FB_Cluster_0	ENSMUSG00000006057	Atp5g1	11.12412353	4.795397479	1078	775	0.878	0.688	-1.213952248	1.29E-84	3.92E-80	down
FB_Cluster_0	ENSMUSG00000031818	Cox4i1	15.02959134	7.213504324	1078	775	0.927	0.801	-1.059023185	5.86E-83	1.79E-78	down
FB_Cluster_0	ENSMUSG00000041616	Nppa	7.321724401	1.624460901	1078	775	0.661	0.302	-2.172153346	4.81E-79	1.47E-74	down
FB_Cluster_0	ENSMUSG00000040752	Myh6	30.86352722	17.49426225	1078	775	0.992	0.981	-0.819017551	2.32E-76	7.07E-72	down
FB_Cluster_0	ENSMUSG00000000088	Cox5a	8.695927815	3.541845342	1078	775	0.788	0.578	-1.295814606	3.90E-71	1.19E-66	down
FB_Cluster_0	ENSMUSG00000022354	Ndufb9	7.334720966	2.999869277	1078	775	0.757	0.533	-1.289814026	3.44E-67	1.05E-62	down
FB_Cluster_0	ENSMUSG00000034566	Atp5h	9.50505274	4.2934009	1078	775	0.838	0.639	-1.146555316	1.32E-66	4.01E-62	down
FB_Cluster_0	ENSMUSG00000038583	Pln	10.31072548	5.087368242	1078	775	0.855	0.724	-1.01914005	1.49E-60	4.54E-56	down
FB_Cluster_0	ENSMUSG00000029467	Atp2a2	16.52314047	8.904675382	1078	775	0.926	0.883	-0.891845524	2.39E-59	7.29E-55	down
FB_Cluster_0	ENSMUSG00000049422	Chchd10	7.209198053	3.186139979	1078	775	0.755	0.515	-1.178003865	9.33E-57	2.84E-52	down
FB_Cluster_0	ENSMUSG00000030470	Csrp3	5.647228756	2.134927801	1078	775	0.65	0.388	-1.403313763	2.54E-55	7.73E-51	down
FB_Cluster_0	ENSMUSG00000057666	Gapdh	4.84656077	1.977001404	1078	775	0.615	0.397	-1.29360424	2.83E-51	8.61E-47	down
FB_Cluster_0	ENSMUSG00000079017	Ifi27l2a	1.205460862	4.0550325	1078	775	0.204	0.537	1.750044568	1.55E-50	4.71E-46	up
FB_Cluster_0	ENSMUSG00000070493	Chchd2	7.6781861	3.795579388	1078	775	0.763	0.606	-1.016426181	2.26E-50	6.88E-46	down
FB_Cluster_0	ENSMUSG00000023861	Mpc1	3.628897058	1.328136891	1078	775	0.503	0.305	-1.450058413	9.05E-50	2.76E-45	down
FB_Cluster_0	ENSMUSG00000019577	Pdk4	0.292104704	1.523531394	1078	775	0.057	0.314	2.382462613	2.90E-49	8.83E-45	up
FB_Cluster_0	ENSMUSG00000038393	Txnip	2.765285527	6.271726173	1078	775	0.415	0.738	1.181404952	3.18E-48	9.70E-44	up
FB_Cluster_0	ENSMUSG00000030399	Ckm	4.426845751	1.775507598	1078	775	0.586	0.332	-1.317998907	5.13E-45	1.56E-40	down
FB_Cluster_0	ENSMUSG00000035530	Eif1	7.683833714	4.289589094	1078	775	0.763	0.655	-0.840971985	2.57E-44	7.82E-40	down
FB_Cluster_0	ENSMUSG00000002985	Apoe	53.39514188	25.35206446	1078	775	0.936	0.889	-1.074602264	6.61E-44	2.01E-39	down
FB_Cluster_0	ENSMUSG00000022956	Atp5o	5.531320047	2.390991436	1078	775	0.619	0.436	-1.209980602	1.31E-43	4.00E-39	down
FB_Cluster_0	ENSMUSG00000061086	Myl4	2.486831975	0.53846699	1078	775	0.361	0.124	-2.207169335	1.30E-42	3.98E-38	down
FB_Cluster_0	ENSMUSG00000023944	Hsp90ab1	7.201709892	3.967837089	1078	775	0.756	0.628	-0.859970365	4.28E-41	1.30E-36	down
FB_Cluster_0	ENSMUSG00000030246	Ldhb	3.704951773	1.431539155	1078	775	0.506	0.308	-1.371825795	4.58E-41	1.40E-36	down
FB_Cluster_0	ENSMUSG00000030869	Ndufab1	4.708896308	2.124512374	1078	775	0.598	0.41	-1.14821994	1.04E-40	3.17E-36	down
FB_Cluster_0	ENSMUSG00000029632	Ndufa4	9.19109582	5.356402817	1078	775	0.81	0.708	-0.778961182	3.76E-39	1.15E-34	down
FB_Cluster_0	ENSMUSG00000022186	Oxct1	2.616213765	0.867155293	1078	775	0.412	0.209	-1.593006922	4.32E-39	1.32E-34	down
FB_Cluster_0	ENSMUSG00000044080	S100a1	4.19046817	1.722421853	1078	775	0.538	0.329	-1.282623576	4.37E-39	1.33E-34	down
FB_Cluster_0	ENSMUSG00000027875	Hmgcs2	0.450712098	1.606887864	1078	775	0.087	0.325	1.833760896	5.21E-38	1.59E-33	up
FB_Cluster_0	ENSMUSG00000060600	Eno3	2.305061754	0.722181686	1078	775	0.372	0.175	-1.674234494	1.48E-37	4.52E-33	down
FB_Cluster_0	ENSMUSG00000020321	Mdh1	4.495827873	2.048528306	1078	775	0.566	0.4	-1.133960639	2.71E-37	8.26E-33	down
FB_Cluster_0	ENSMUSG00000025204	Ndufb8	4.662538782	2.185207944	1078	775	0.59	0.404	-1.093310075	1.13E-36	3.45E-32	down
FB_Cluster_0	ENSMUSG00000020469	Myl7	2.154681489	0.547527371	1078	775	0.348	0.121	-1.976275116	3.91E-36	1.19E-31	down
FB_Cluster_0	ENSMUSG00000038690	Atp5j2	6.445871621	3.667368228	1078	775	0.712	0.588	-0.813613369	5.35E-35	1.63E-30	down
FB_Cluster_0	ENSMUSG00000040048	Ndufb10	4.438831239	2.073518794	1078	775	0.57	0.392	-1.098061662	1.08E-34	3.28E-30	down
FB_Cluster_0	ENSMUSG00000060126	Tpt1	10.94519205	7.033198176	1078	775	0.875	0.795	-0.638037163	1.42E-34	4.33E-30	down
FB_Cluster_0	ENSMUSG00000025781	Atp5c1	4.43158096	2.27133872	1078	775	0.583	0.443	-0.96424764	4.71E-34	1.43E-29	down
FB_Cluster_0	ENSMUSG00000025428	Atp5a1	7.255263366	4.329486453	1078	775	0.75	0.659	-0.744818639	4.75E-34	1.45E-29	down
FB_Cluster_0	ENSMUSG00000075706	Gpx4	4.482196832	2.289496932	1078	775	0.59	0.435	-0.969144547	5.54E-34	1.69E-29	down
FB_Cluster_0	ENSMUSG00000026568	Mpc2	4.046396743	2.028058472	1078	775	0.542	0.405	-0.996503052	1.22E-33	3.72E-29	down
FB_Cluster_0	ENSMUSG00000028773	Fabp3	18.28530715	12.47645298	1078	775	0.968	0.926	-0.55147335	3.38E-33	1.03E-28	down
FB_Cluster_0	ENSMUSG00000003072	Atp5d	3.430945288	1.608398628	1078	775	0.494	0.347	-1.092933464	5.42E-33	1.65E-28	down
FB_Cluster_0	ENSMUSG00000014313	Cox6c	9.899571624	6.292921575	1078	775	0.834	0.773	-0.653627782	1.41E-32	4.29E-28	down
FB_Cluster_0	ENSMUSG00000030695	Aldoa	4.688518934	2.443179992	1078	775	0.596	0.466	-0.940343828	1.65E-32	5.02E-28	down
FB_Cluster_0	ENSMUSG00000009863	Sdhb	2.876483853	1.32409729	1078	775	0.431	0.302	-1.119238443	9.37E-32	2.86E-27	down
FB_Cluster_0	ENSMUSG00000022890	Atp5j	6.111989311	3.524499901	1078	775	0.692	0.579	-0.794206127	2.19E-31	6.67E-27	down
FB_Cluster_0	ENSMUSG00000036751	Cox6b1	4.846544683	2.630882936	1078	775	0.609	0.477	-0.881384428	2.20E-31	6.71E-27	down
FB_Cluster_0	ENSMUSG00000031231	Cox7b	6.347574877	3.568690476	1078	775	0.692	0.564	-0.830793033	3.10E-31	9.45E-27	down
FB_Cluster_0	ENSMUSG00000024066	Xdh	2.265303313	4.422822799	1078	775	0.361	0.631	0.965232142	2.79E-30	8.49E-26	up
FB_Cluster_0	ENSMUSG00000023089	Ndufa5	4.560255681	2.485527476	1078	775	0.576	0.468	-0.875536257	3.41E-30	1.04E-25	down
FB_Cluster_0	ENSMUSG00000027673	Ndufb5	3.448660548	1.590957366	1078	775	0.499	0.33	-1.11609211	4.66E-30	1.42E-25	down
FB_Cluster_0	ENSMUSG00000021520	Uqcrb	5.153792467	2.767023649	1078	775	0.625	0.474	-0.897275324	9.88E-30	3.01E-25	down
FB_Cluster_0	ENSMUSG00000044749	Abca6	4.273860205	7.601366662	1078	775	0.503	0.755	0.83070433	1.07E-29	3.26E-25	up
FB_Cluster_0	ENSMUSG00000033705	Stard9	0.802416199	1.532053114	1078	775	0.138	0.337	0.93295806	2.45E-29	7.47E-25	up
FB_Cluster_0	ENSMUSG00000024661	Fth1	17.07893754	11.98343353	1078	775	0.927	0.907	-0.511173305	2.99E-29	9.12E-25	down
FB_Cluster_0	ENSMUSG00000029561	Oasl2	0.204717561	1.019380329	1078	775	0.042	0.209	2.315422616	9.09E-29	2.77E-24	up
FB_Cluster_0	ENSMUSG00000017778	Cox7c	9.015535535	5.749345294	1078	775	0.815	0.751	-0.649006423	1.25E-28	3.81E-24	down
FB_Cluster_0	ENSMUSG00000021622	Ckmt2	3.668038966	1.774033841	1078	775	0.517	0.342	-1.047933445	1.51E-28	4.61E-24	down
FB_Cluster_0	ENSMUSG00000063694	Cycs	5.130533949	2.884268198	1078	775	0.638	0.506	-0.830881758	2.05E-28	6.26E-24	down
FB_Cluster_0	ENSMUSG00000025393	Atp5b	6.258692915	4.00886825	1078	775	0.698	0.635	-0.642653451	3.14E-28	9.56E-24	down
FB_Cluster_0	ENSMUSG00000061518	Cox5b	5.596738797	3.272114225	1078	775	0.655	0.537	-0.774344994	4.17E-28	1.27E-23	down
FB_Cluster_0	ENSMUSG00000030541	Idh2	4.055324914	2.239445545	1078	775	0.544	0.435	-0.856647077	5.57E-28	1.70E-23	down
FB_Cluster_0	ENSMUSG00000036199	Ndufa13	5.97094944	3.584906672	1078	775	0.686	0.586	-0.73600871	1.75E-27	5.33E-23	down
FB_Cluster_0	ENSMUSG00000038717	Atp5l	5.411613659	3.128132944	1078	775	0.634	0.53	-0.790737559	4.11E-27	1.25E-22	down
FB_Cluster_0	ENSMUSG00000017404	Rpl19	5.753383337	3.429289329	1078	775	0.657	0.545	-0.746483974	8.55E-27	2.60E-22	down
FB_Cluster_0	ENSMUSG00000041828	Abca8a	21.78589575	31.2851545	1078	775	0.934	0.974	0.522081786	1.13E-26	3.45E-22	up
FB_Cluster_0	ENSMUSG00000000740	Rpl13	7.909881507	5.057853746	1078	775	0.766	0.684	-0.645120478	1.18E-26	3.60E-22	down
FB_Cluster_0	ENSMUSG00000035242	Oaz1	3.157938167	1.854618509	1078	775	0.453	0.397	-0.767828362	1.62E-26	4.94E-22	down
FB_Cluster_0	ENSMUSG00000037926	Ssh2	5.653496616	9.256741719	1078	775	0.617	0.819	0.711351103	5.67E-26	1.73E-21	up
FB_Cluster_0	ENSMUSG00000000563	Atp5pb	4.507088093	2.542089625	1078	775	0.578	0.455	-0.826156011	6.42E-26	1.96E-21	down
FB_Cluster_0	ENSMUSG00000070327	Rnf213	0.746729744	2.087100568	1078	775	0.135	0.347	1.48271795	8.94E-26	2.73E-21	up
FB_Cluster_0	ENSMUSG00000098274	Rpl24	4.860696273	2.912386349	1078	775	0.584	0.494	-0.738941381	1.01E-25	3.08E-21	down
FB_Cluster_0	ENSMUSG00000002379	Ndufa11	3.316927761	1.693765022	1078	775	0.488	0.341	-0.96957217	1.61E-25	4.92E-21	down
FB_Cluster_0	ENSMUSG00000020163	Uqcr11	5.125801178	3.069389087	1078	775	0.616	0.53	-0.739807124	2.33E-25	7.10E-21	down
FB_Cluster_0	ENSMUSG00000031059	Ndufb11	4.144281054	2.306025489	1078	775	0.557	0.436	-0.845685637	3.55E-25	1.08E-20	down
FB_Cluster_0	ENSMUSG00000020153	Ndufs7	2.944287794	1.424213209	1078	775	0.422	0.302	-1.047701263	4.36E-25	1.33E-20	down
FB_Cluster_0	ENSMUSG00000062683	Atp5g2	2.902729051	1.393763191	1078	775	0.435	0.29	-1.058370648	4.45E-25	1.35E-20	down
FB_Cluster_0	ENSMUSG00000044533	Rps2	4.793855671	2.988879463	1078	775	0.601	0.526	-0.681563584	2.16E-24	6.58E-20	down
FB_Cluster_0	ENSMUSG00000026895	Ndufa8	2.191244693	0.952699208	1078	775	0.352	0.222	-1.201572315	2.82E-24	8.58E-20	down
FB_Cluster_0	ENSMUSG00000028648	Ndufs5	2.991070448	1.671522984	1078	775	0.423	0.354	-0.839460623	2.83E-24	8.63E-20	down
FB_Cluster_0	ENSMUSG00000033880	Lgals3bp	0.593252782	1.530732361	1078	775	0.119	0.314	1.367354274	3.40E-24	1.04E-19	up
FB_Cluster_0	ENSMUSG00000038462	Uqcrfs1	2.684429899	1.308430378	1078	775	0.402	0.277	-1.036722056	4.65E-24	1.42E-19	down
FB_Cluster_0	ENSMUSG00000024099	Ndufv2	2.276263557	1.175655487	1078	775	0.363	0.27	-0.953142924	7.02E-24	2.14E-19	down
FB_Cluster_0	ENSMUSG00000037499	Nenf	3.151950684	1.841474189	1078	775	0.455	0.394	-0.775351214	1.25E-23	3.82E-19	down
FB_Cluster_0	ENSMUSG00000025488	Cox8b	4.94479185	2.981061611	1078	775	0.622	0.516	-0.730064381	1.28E-23	3.90E-19	down
FB_Cluster_0	ENSMUSG00000030074	Gxylt2	1.090509633	2.283882537	1078	775	0.195	0.412	1.066416816	1.40E-23	4.25E-19	up
FB_Cluster_0	ENSMUSG00000040212	Emp3	5.556963763	3.429816521	1078	775	0.616	0.55	-0.69614933	1.58E-23	4.81E-19	down
FB_Cluster_0	ENSMUSG00000002107	Celf2	27.54182459	36.89375858	1078	775	0.955	0.985	0.421751306	1.68E-23	5.13E-19	up
FB_Cluster_0	ENSMUSG00000051747	Ttn	15.55432802	11.00004692	1078	775	0.882	0.88	-0.499802551	1.97E-23	6.01E-19	down
FB_Cluster_0	ENSMUSG00000014294	Ndufa2	3.129451032	1.737337013	1078	775	0.457	0.36	-0.848995025	2.41E-23	7.35E-19	down
FB_Cluster_0	ENSMUSG00000024953	Prdx5	2.126186981	1.044269377	1078	775	0.34	0.246	-1.025704267	2.44E-23	7.43E-19	down
FB_Cluster_0	ENSMUSG00000019899	Lama2	22.10757765	28.71350339	1078	775	0.945	0.992	0.37718691	2.45E-23	7.47E-19	up
FB_Cluster_0	ENSMUSG00000073490	Ifi207	2.139785183	3.370221681	1078	775	0.311	0.534	0.655352906	4.58E-23	1.40E-18	up
FB_Cluster_0	ENSMUSG00000006356	Crip2	3.646329839	2.345133409	1078	775	0.522	0.465	-0.636753122	6.26E-23	1.91E-18	down
FB_Cluster_0	ENSMUSG00000033420	Antxr1	2.110434077	3.35001084	1078	775	0.332	0.556	0.666600705	7.43E-23	2.27E-18	up
FB_Cluster_0	ENSMUSG00000064357	mt-Atp6	47.52389417	35.41353565	1078	775	0.994	0.982	-0.424351131	8.60E-23	2.62E-18	down
FB_Cluster_0	ENSMUSG00000044894	Uqcrq	4.494092165	2.906338936	1078	775	0.57	0.526	-0.628809216	8.63E-23	2.63E-18	down
FB_Cluster_0	ENSMUSG00000023175	Bsg	4.03864946	2.610339314	1078	775	0.544	0.494	-0.629616032	9.39E-23	2.86E-18	down
FB_Cluster_0	ENSMUSG00000053279	Aldh1a1	5.244388728	8.447761682	1078	775	0.571	0.778	0.687784078	1.38E-22	4.21E-18	up
FB_Cluster_0	ENSMUSG00000026202	Tuba4a	1.012235758	0.217473529	1078	775	0.181	0.059	-2.218112917	1.54E-22	4.68E-18	down
FB_Cluster_0	ENSMUSG00000026748	Plxdc2	8.754822052	12.91754314	1078	775	0.747	0.889	0.561176631	1.90E-22	5.78E-18	up
FB_Cluster_0	ENSMUSG00000012848	Rps5	3.816142938	2.50771515	1078	775	0.51	0.468	-0.605722003	2.04E-22	6.23E-18	down
FB_Cluster_0	ENSMUSG00000042045	Sln	1.312394807	0.351955982	1078	775	0.217	0.084	-1.898434953	2.75E-22	8.37E-18	down
FB_Cluster_0	ENSMUSG00000032518	Rpsa	4.948076985	3.138522929	1078	775	0.621	0.524	-0.656765388	3.00E-22	9.15E-18	down
FB_Cluster_0	ENSMUSG00000036570	Fxyd1	3.332926953	1.932787318	1078	775	0.487	0.388	-0.786075449	3.47E-22	1.06E-17	down
FB_Cluster_0	ENSMUSG00000046718	Bst2	1.224077703	2.562897064	1078	775	0.196	0.405	1.06601883	3.55E-22	1.08E-17	up
FB_Cluster_0	ENSMUSG00000008682	Rpl10	4.155523387	2.637781742	1078	775	0.555	0.483	-0.655685024	4.09E-22	1.25E-17	down
FB_Cluster_0	ENSMUSG00000022551	Cyc1	2.464810912	1.128967861	1078	775	0.378	0.248	-1.126403304	5.18E-22	1.58E-17	down
FB_Cluster_0	ENSMUSG00000020460	Rps27a	4.841297468	3.116714187	1078	775	0.601	0.537	-0.635351392	5.21E-22	1.59E-17	down
FB_Cluster_0	ENSMUSG00000040852	Plekhh2	1.705131822	3.053725377	1078	775	0.282	0.506	0.840649686	6.15E-22	1.87E-17	up
FB_Cluster_0	ENSMUSG00000022053	Ebf2	5.688156776	8.330384609	1078	775	0.601	0.81	0.550413832	6.76E-22	2.06E-17	up
FB_Cluster_0	ENSMUSG00000075602	Ly6a	2.421215936	4.960904922	1078	775	0.317	0.542	1.034841052	7.20E-22	2.19E-17	up
FB_Cluster_0	ENSMUSG00000027447	Cst3	24.77732425	17.30764929	1078	775	0.956	0.928	-0.517608091	7.22E-22	2.20E-17	down
FB_Cluster_0	ENSMUSG00000009633	G0s2	7.288176257	4.382190866	1078	775	0.653	0.6	-0.733892401	7.23E-22	2.20E-17	down
FB_Cluster_0	ENSMUSG00000002100	Mybpc3	2.386327791	1.325004438	1078	775	0.373	0.299	-0.848746614	7.44E-22	2.27E-17	down
FB_Cluster_0	ENSMUSG00000063882	Uqcrh	4.720074884	2.873207849	1078	775	0.587	0.493	-0.71612774	7.46E-22	2.27E-17	down
FB_Cluster_0	ENSMUSG00000057335	Cep170	1.224268017	2.190680054	1078	775	0.222	0.428	0.839407387	7.52E-22	2.29E-17	up
FB_Cluster_0	ENSMUSG00000019179	Mdh2	2.550510935	1.401539378	1078	775	0.394	0.306	-0.863727638	7.58E-22	2.31E-17	down
FB_Cluster_0	ENSMUSG00000026208	Des	2.854902214	1.499226585	1078	775	0.437	0.316	-0.929177197	8.00E-22	2.44E-17	down
FB_Cluster_0	ENSMUSG00000041757	Plekha6	1.992192273	2.94515385	1078	775	0.325	0.53	0.563962675	8.97E-22	2.74E-17	up
FB_Cluster_0	ENSMUSG00000034160	Ogt	1.87117605	3.006173903	1078	775	0.314	0.535	0.683954059	9.93E-22	3.03E-17	up
FB_Cluster_0	ENSMUSG00000018770	Atp5g3	3.898581216	2.338021434	1078	775	0.516	0.44	-0.737636334	1.04E-21	3.17E-17	down
FB_Cluster_0	ENSMUSG00000059291	Rpl11	4.570775312	2.763714023	1078	775	0.594	0.47	-0.725809925	1.07E-21	3.26E-17	down
FB_Cluster_0	ENSMUSG00000044471	Lncpint	3.55657133	5.178810749	1078	775	0.475	0.701	0.542121034	1.08E-21	3.29E-17	up
FB_Cluster_0	ENSMUSG00000067274	Rplp0	3.148744419	2.396361352	1078	775	0.466	0.483	-0.393916804	1.32E-21	4.03E-17	down
FB_Cluster_0	ENSMUSG00000038608	Dock10	0.899536446	1.805575884	1078	775	0.148	0.333	1.005124941	1.62E-21	4.95E-17	up
FB_Cluster_0	ENSMUSG00000006818	Sod2	2.268198085	1.14287452	1078	775	0.36	0.255	-0.988817	2.04E-21	6.22E-17	down
FB_Cluster_0	ENSMUSG00000027602	Map1lc3a	2.389032357	1.175150904	1078	775	0.374	0.258	-1.023517991	2.26E-21	6.88E-17	down
FB_Cluster_0	ENSMUSG00000052920	Prkg1	6.40308725	10.32352112	1078	775	0.585	0.783	0.689086995	2.73E-21	8.32E-17	up
FB_Cluster_0	ENSMUSG00000062981	Mrpl42	1.796109902	0.717770425	1078	775	0.291	0.159	-1.323160584	3.73E-21	1.14E-16	down
FB_Cluster_0	ENSMUSG00000035885	Cox8a	2.615150181	1.593785275	1078	775	0.385	0.345	-0.714401174	4.24E-21	1.29E-16	down
FB_Cluster_0	ENSMUSG00000004610	Etfb	3.241024765	1.898631513	1078	775	0.485	0.387	-0.77145864	5.09E-21	1.55E-16	down
FB_Cluster_0	ENSMUSG00000019947	Arid5b	0.810482028	1.51674003	1078	775	0.13	0.294	0.904038849	6.99E-21	2.13E-16	up
FB_Cluster_0	ENSMUSG00000040952	Rps19	3.181859996	2.258102943	1078	775	0.453	0.459	-0.494740552	7.27E-21	2.22E-16	down
FB_Cluster_0	ENSMUSG00000037706	Cd81	7.519544484	5.391312697	1078	775	0.732	0.717	-0.480001107	7.76E-21	2.36E-16	down
FB_Cluster_0	ENSMUSG00000062980	Cped1	6.199851393	9.213348624	1078	775	0.658	0.841	0.571484358	8.06E-21	2.46E-16	up
FB_Cluster_0	ENSMUSG00000033938	Ndufb7	3.092926103	1.77015437	1078	775	0.451	0.356	-0.805062331	9.58E-21	2.92E-16	down
FB_Cluster_0	ENSMUSG00000022146	Osmr	1.568940586	2.431993299	1078	775	0.247	0.441	0.632315903	1.12E-20	3.42E-16	up
FB_Cluster_0	ENSMUSG00000022174	Dad1	2.171542751	1.376565133	1078	775	0.35	0.315	-0.657609117	1.34E-20	4.08E-16	down
FB_Cluster_0	ENSMUSG00000037210	Fam193a	1.341855881	1.724435987	1078	775	0.237	0.383	0.361870994	1.34E-20	4.09E-16	up
FB_Cluster_0	ENSMUSG00000041797	Abca9	3.051182549	4.551074698	1078	775	0.421	0.643	0.576823186	1.37E-20	4.18E-16	up
FB_Cluster_0	ENSMUSG00000062647	Rpl7a	2.420446922	1.520531651	1078	775	0.391	0.329	-0.670662336	1.89E-20	5.76E-16	down
FB_Cluster_0	ENSMUSG00000043716	Rpl7	3.210691808	2.014556848	1078	775	0.467	0.409	-0.672394993	2.00E-20	6.11E-16	down
FB_Cluster_0	ENSMUSG00000020475	Pgam2	1.69513935	0.675368803	1078	775	0.283	0.157	-1.327527936	2.33E-20	7.09E-16	down
FB_Cluster_0	ENSMUSG00000032330	Cox7a2	4.198854938	2.510784739	1078	775	0.552	0.449	-0.741834502	2.38E-20	7.26E-16	down
FB_Cluster_0	ENSMUSG00000031320	Rps4x	4.372748134	2.673574738	1078	775	0.571	0.465	-0.709749278	2.69E-20	8.19E-16	down
FB_Cluster_0	ENSMUSG00000029019	Nppb	1.319936375	0.316746254	1078	775	0.21	0.068	-2.058722821	3.47E-20	1.06E-15	down
FB_Cluster_0	ENSMUSG00000024087	Cyp1b1	0.620416275	1.046357829	1078	775	0.113	0.246	0.75397322	4.27E-20	1.30E-15	up
FB_Cluster_0	ENSMUSG00000006586	Runx1t1	1.61729245	2.71615838	1078	775	0.266	0.472	0.747950938	4.39E-20	1.34E-15	up
FB_Cluster_0	ENSMUSG00000007877	Tcap	2.51790762	1.295411557	1078	775	0.378	0.272	-0.958760763	4.49E-20	1.37E-15	down
FB_Cluster_0	ENSMUSG00000073489	Ifi204	0.679582127	1.319165328	1078	775	0.121	0.279	0.956802654	4.66E-20	1.42E-15	up
FB_Cluster_0	ENSMUSG00000024900	Cpt1a	0.423707024	1.031218443	1078	775	0.089	0.243	1.283010465	4.81E-20	1.47E-15	up
FB_Cluster_0	ENSMUSG00000022820	Ndufb4	2.271645855	1.326389722	1078	775	0.35	0.298	-0.776187949	5.20E-20	1.58E-15	down
FB_Cluster_0	ENSMUSG00000021606	Ndufs6	2.347421442	1.353973683	1078	775	0.358	0.294	-0.793832089	5.38E-20	1.64E-15	down
FB_Cluster_0	ENSMUSG00000047216	Cdh19	2.017956836	3.727759629	1078	775	0.285	0.499	0.88538073	6.18E-20	1.88E-15	up
FB_Cluster_0	ENSMUSG00000035597	Prpf39	1.122115396	1.677004591	1078	775	0.199	0.365	0.579623053	7.16E-20	2.18E-15	up
FB_Cluster_0	ENSMUSG00000032042	Srpr	2.073758401	1.515908792	1078	775	0.332	0.339	-0.452039272	9.18E-20	2.80E-15	down
FB_Cluster_0	ENSMUSG00000024049	Myom1	1.644239109	0.815685276	1078	775	0.266	0.2	-1.01124648	9.24E-20	2.82E-15	down
FB_Cluster_0	ENSMUSG00000041453	Rpl21	4.483222727	2.866999568	1078	775	0.563	0.492	-0.644976347	1.07E-19	3.26E-15	down
FB_Cluster_0	ENSMUSG00000055762	Eef1d	1.425403831	0.718114902	1078	775	0.244	0.183	-0.988984425	1.18E-19	3.60E-15	down
FB_Cluster_0	ENSMUSG00000030744	Rps3	2.745015312	1.908540603	1078	775	0.423	0.395	-0.524321284	1.25E-19	3.80E-15	down
FB_Cluster_0	ENSMUSG00000039852	Rere	2.168489783	3.270932927	1078	775	0.364	0.574	0.592989108	1.50E-19	4.58E-15	up
FB_Cluster_0	ENSMUSG00000012405	Rpl15	3.30073058	2.016432343	1078	775	0.467	0.394	-0.710952547	1.54E-19	4.70E-15	down
FB_Cluster_0	ENSMUSG00000022150	Dab2	0.58447661	0.892916687	1078	775	0.112	0.227	0.611295028	1.56E-19	4.77E-15	up
FB_Cluster_0	ENSMUSG00000031299	Pdha1	1.68758055	0.867124901	1078	775	0.288	0.209	-0.960563764	1.94E-19	5.92E-15	down
FB_Cluster_0	ENSMUSG00000008668	Rps18	3.148911345	2.068579149	1078	775	0.445	0.414	-0.606189054	2.12E-19	6.46E-15	down
FB_Cluster_0	ENSMUSG00000026389	Steap3	1.546487941	2.056464229	1078	775	0.26	0.417	0.41114726	2.52E-19	7.69E-15	up
FB_Cluster_0	ENSMUSG00000041977	Arhgef11	0.828777172	1.192771438	1078	775	0.152	0.286	0.525208329	2.53E-19	7.72E-15	up
FB_Cluster_0	ENSMUSG00000062901	Klhl24	1.057622306	1.417639537	1078	775	0.189	0.325	0.422631597	2.86E-19	8.72E-15	up
FB_Cluster_0	ENSMUSG00000090272	Mndal	1.254974764	2.360427337	1078	775	0.204	0.397	0.911335884	2.99E-19	9.10E-15	up
FB_Cluster_0	ENSMUSG00000015305	Sash1	2.667176708	3.681220497	1078	775	0.414	0.618	0.464855857	3.27E-19	9.97E-15	up
FB_Cluster_0	ENSMUSG00000079105	C7	4.725477188	1.644493311	1078	775	0.344	0.194	-1.522759687	3.35E-19	1.02E-14	down
FB_Cluster_0	ENSMUSG00000059070	Rpl18	4.630249719	3.052752782	1078	775	0.584	0.511	-0.600963141	3.56E-19	1.09E-14	down
FB_Cluster_0	ENSMUSG00000027406	Idh3b	1.539081753	0.833223989	1078	775	0.267	0.208	-0.885214185	3.61E-19	1.10E-14	down
FB_Cluster_0	ENSMUSG00000093765	Gm20658	0.212955777	0.803990662	1078	775	0.036	0.155	1.916127008	4.94E-19	1.51E-14	up
FB_Cluster_0	ENSMUSG00000037921	Ddx60	0.355007699	0.952791861	1078	775	0.066	0.201	1.424055858	5.27E-19	1.60E-14	up
FB_Cluster_0	ENSMUSG00000025745	Hadha	3.502378122	2.374855033	1078	775	0.492	0.462	-0.560475841	5.35E-19	1.63E-14	down
FB_Cluster_0	ENSMUSG00000028082	Sh3d19	3.44721022	4.95140272	1078	775	0.461	0.674	0.5223953	6.29E-19	1.92E-14	up
FB_Cluster_0	ENSMUSG00000025794	Rpl14	2.283937834	1.495156129	1078	775	0.352	0.319	-0.611193917	6.77E-19	2.06E-14	down
FB_Cluster_0	ENSMUSG00000020483	Dynll2	1.14372574	0.597123931	1078	775	0.199	0.156	-0.937523397	7.46E-19	2.27E-14	down
FB_Cluster_0	ENSMUSG00000053093	Myh7	0.737968082	0.124428724	1078	775	0.136	0.035	-2.567275345	7.75E-19	2.36E-14	down
FB_Cluster_0	ENSMUSG00000025609	Mkln1	1.748543251	2.343869932	1078	775	0.292	0.462	0.422718074	8.11E-19	2.47E-14	up
FB_Cluster_0	ENSMUSG00000020267	Hint1	1.961199389	1.226700437	1078	775	0.314	0.28	-0.676909192	8.84E-19	2.69E-14	down
FB_Cluster_0	ENSMUSG00000054263	Lifr	1.248986868	1.803096682	1078	775	0.211	0.369	0.529682953	9.74E-19	2.97E-14	up
FB_Cluster_0	ENSMUSG00000054404	Slfn5	1.072632823	1.935869946	1078	775	0.194	0.377	0.851765756	9.93E-19	3.03E-14	up
FB_Cluster_0	ENSMUSG00000020919	Stat5b	1.007961232	1.317721909	1078	775	0.164	0.292	0.386572143	1.00E-18	3.05E-14	up
FB_Cluster_0	ENSMUSG00000059173	Pde1a	3.816312026	5.767039734	1078	775	0.49	0.699	0.595639043	1.06E-18	3.24E-14	up
FB_Cluster_0	ENSMUSG00000027829	Ccnl1	1.078248648	1.445830103	1078	775	0.198	0.337	0.423174113	1.06E-18	3.24E-14	up
FB_Cluster_0	ENSMUSG00000062604	Srpk2	1.416160854	1.829721129	1078	775	0.24	0.387	0.369615615	1.12E-18	3.41E-14	up
FB_Cluster_0	ENSMUSG00000002265	Peg3	0.745853151	1.560391565	1078	775	0.132	0.299	1.064843628	1.15E-18	3.49E-14	up
FB_Cluster_0	ENSMUSG00000032377	Plscr4	1.700432339	2.709063145	1078	775	0.266	0.463	0.671860833	1.31E-18	3.98E-14	up
FB_Cluster_0	ENSMUSG00000008683	Rps15a	3.136235429	2.282206728	1078	775	0.451	0.446	-0.458587169	1.37E-18	4.16E-14	down
FB_Cluster_0	ENSMUSG00000028081	Rps3a1	4.653732874	3.144966774	1078	775	0.566	0.529	-0.565328755	1.42E-18	4.32E-14	down
FB_Cluster_0	ENSMUSG00000034801	Sos2	1.188518059	1.699483742	1078	775	0.208	0.36	0.515896242	1.53E-18	4.67E-14	up
FB_Cluster_0	ENSMUSG00000035545	Leng8	0.671397815	1.031187997	1078	775	0.131	0.255	0.618992665	1.80E-18	5.48E-14	up
FB_Cluster_0	ENSMUSG00000030275	Etnk1	0.907140446	1.270479692	1078	775	0.159	0.286	0.485930002	1.86E-18	5.67E-14	up
FB_Cluster_0	ENSMUSG00000020612	Prkar1a	1.499318216	1.095075395	1078	775	0.262	0.268	-0.453240895	1.98E-18	6.03E-14	down
FB_Cluster_0	ENSMUSG00000058558	Rpl5	2.937898138	2.198494498	1078	775	0.448	0.444	-0.418251939	1.98E-18	6.04E-14	down
FB_Cluster_0	ENSMUSG00000092274	Neat1	3.974551322	5.416209588	1078	775	0.529	0.73	0.446481899	1.99E-18	6.05E-14	up
FB_Cluster_0	ENSMUSG00000008136	Fhl2	2.490610149	1.438344822	1078	775	0.383	0.306	-0.79204726	2.12E-18	6.47E-14	down
FB_Cluster_0	ENSMUSG00000040274	Cdk6	0.517218849	1.122729259	1078	775	0.105	0.254	1.118012899	2.17E-18	6.62E-14	up
FB_Cluster_0	ENSMUSG00000055436	Srsf11	2.301008474	3.052413418	1078	775	0.367	0.548	0.407668644	2.42E-18	7.39E-14	up
FB_Cluster_0	ENSMUSG00000020022	Ndufa12	1.989483879	1.040255297	1078	775	0.327	0.239	-0.935390408	2.47E-18	7.54E-14	down
FB_Cluster_0	ENSMUSG00000054611	Kdm2a	1.415439311	1.857100431	1078	775	0.243	0.395	0.391777706	2.82E-18	8.60E-14	up
FB_Cluster_0	ENSMUSG00000090394	4930523C07Rik	0.767597285	1.312048575	1078	775	0.141	0.29	0.773321634	2.82E-18	8.61E-14	up
FB_Cluster_0	ENSMUSG00000063558	Aox1	0.865942036	1.337787853	1078	775	0.159	0.301	0.627448232	3.09E-18	9.42E-14	up
FB_Cluster_0	ENSMUSG00000005533	Igf1r	2.274417269	3.453016073	1078	775	0.359	0.563	0.602338442	3.10E-18	9.44E-14	up
FB_Cluster_0	ENSMUSG00000013593	Ndufs2	1.946043562	1.078487511	1078	775	0.308	0.241	-0.851474903	3.45E-18	1.05E-13	down
FB_Cluster_0	ENSMUSG00000024299	Adamts10	2.145486402	2.892600452	1078	775	0.359	0.543	0.431044936	3.95E-18	1.20E-13	up
FB_Cluster_0	ENSMUSG00000028413	B4galt1	2.25855024	3.094891229	1078	775	0.346	0.534	0.454474439	4.01E-18	1.22E-13	up
FB_Cluster_0	ENSMUSG00000020700	Map3k3	1.019666777	1.413816816	1078	775	0.188	0.325	0.471458003	4.70E-18	1.43E-13	up
FB_Cluster_0	ENSMUSG00000036334	Igsf10	0.698667531	0.964445553	1078	775	0.127	0.237	0.465036801	4.85E-18	1.48E-13	up
FB_Cluster_0	ENSMUSG00000022450	Ndufa6	2.936726307	1.831163819	1078	775	0.426	0.364	-0.681418297	5.25E-18	1.60E-13	down
FB_Cluster_0	ENSMUSG00000042207	Kdm5b	0.730596343	0.96289982	1078	775	0.136	0.239	0.398263541	5.48E-18	1.67E-13	up
FB_Cluster_0	ENSMUSG00000002014	Ssr4	2.259380079	1.393155412	1078	775	0.361	0.306	-0.697531079	5.49E-18	1.67E-13	down
FB_Cluster_0	ENSMUSG00000054889	Dsp	1.400174401	0.525675844	1078	775	0.237	0.13	-1.413189801	5.53E-18	1.68E-13	down
FB_Cluster_0	ENSMUSG00000018076	Med13l	1.253902767	1.75614521	1078	775	0.221	0.373	0.48595376	5.69E-18	1.73E-13	up
FB_Cluster_0	ENSMUSG00000032826	Ank2	4.255118439	6.283827802	1078	775	0.524	0.725	0.562433411	6.86E-18	2.09E-13	up
FB_Cluster_0	ENSMUSG00000014329	Bicc1	13.05890906	17.02387223	1078	775	0.841	0.948	0.382522276	7.18E-18	2.19E-13	up
FB_Cluster_0	ENSMUSG00000005506	Celf1	1.235378883	1.61757545	1078	775	0.211	0.348	0.388851841	7.50E-18	2.29E-13	up
FB_Cluster_0	ENSMUSG00000063457	Rps15	3.359293408	2.443093663	1078	775	0.474	0.463	-0.45943253	7.62E-18	2.32E-13	down
FB_Cluster_0	ENSMUSG00000039997	Ifi203	2.146546594	3.921146839	1078	775	0.315	0.519	0.869227763	7.67E-18	2.34E-13	up
FB_Cluster_0	ENSMUSG00000027695	Pld1	1.529276844	2.33695764	1078	775	0.248	0.425	0.611749381	7.79E-18	2.37E-13	up
FB_Cluster_0	ENSMUSG00000033713	Foxn3	1.88521333	2.52289793	1078	775	0.3	0.467	0.42033471	8.08E-18	2.46E-13	up
FB_Cluster_0	ENSMUSG00000012535	Tnpo3	0.83207578	1.11793224	1078	775	0.154	0.268	0.426001586	8.38E-18	2.55E-13	up
FB_Cluster_0	ENSMUSG00000042675	Ypel3	0.976479105	1.42435539	1078	775	0.184	0.328	0.544601625	9.19E-18	2.80E-13	up
FB_Cluster_0	ENSMUSG00000021270	Hsp90aa1	1.239265062	0.749694525	1078	775	0.211	0.192	-0.725034009	9.34E-18	2.85E-13	down
FB_Cluster_0	ENSMUSG00000054843	Atrnl1	5.288036417	7.092175051	1078	775	0.585	0.778	0.423489093	9.50E-18	2.89E-13	up
FB_Cluster_0	ENSMUSG00000003380	Rabac1	4.199463354	2.937732516	1078	775	0.559	0.516	-0.515487182	1.01E-17	3.07E-13	down
FB_Cluster_0	ENSMUSG00000041476	Smpx	1.356066537	0.561864041	1078	775	0.229	0.145	-1.270984628	1.08E-17	3.29E-13	down
FB_Cluster_0	ENSMUSG00000026222	Sp100	0.971644815	1.902299202	1078	775	0.18	0.36	0.969170605	1.20E-17	3.64E-13	up
FB_Cluster_0	ENSMUSG00000030306	Tmtc1	2.185009392	2.962227899	1078	775	0.323	0.499	0.439025834	1.20E-17	3.64E-13	up
FB_Cluster_0	ENSMUSG00000071984	Fndc1	2.146878338	3.453207531	1078	775	0.315	0.516	0.685671182	1.45E-17	4.41E-13	up
FB_Cluster_0	ENSMUSG00000032035	Ets1	0.583117768	0.902223088	1078	775	0.107	0.221	0.629609428	1.47E-17	4.49E-13	up
FB_Cluster_0	ENSMUSG00000047497	Adamts12	2.017227061	3.589334497	1078	775	0.292	0.493	0.831311569	1.57E-17	4.80E-13	up
FB_Cluster_0	ENSMUSG00000026872	Zeb2	5.837204409	8.044764496	1078	775	0.619	0.803	0.462765816	1.64E-17	4.98E-13	up
FB_Cluster_0	ENSMUSG00000028410	Dnaja1	2.300855578	1.328245405	1078	775	0.38	0.289	-0.792602797	1.64E-17	4.99E-13	down
FB_Cluster_0	ENSMUSG00000019818	Cd164	1.381196335	0.898243635	1078	775	0.232	0.222	-0.620683543	1.69E-17	5.15E-13	down
FB_Cluster_0	ENSMUSG00000024803	Ankrd1	2.469743685	1.407651933	1078	775	0.373	0.29	-0.811026605	1.79E-17	5.46E-13	down
FB_Cluster_0	ENSMUSG00000015165	Hnrnpl	0.704352615	0.934436343	1078	775	0.13	0.234	0.407748104	1.89E-17	5.75E-13	up
FB_Cluster_0	ENSMUSG00000026571	Dcaf6	0.947388504	1.432002551	1078	775	0.165	0.307	0.595954462	1.96E-17	5.96E-13	up
FB_Cluster_0	ENSMUSG00000073555	Gm4951	0.153576752	0.733368964	1078	775	0.029	0.135	2.254836985	2.10E-17	6.40E-13	up
FB_Cluster_0	ENSMUSG00000025190	Got1	1.391626004	0.600471368	1078	775	0.23	0.139	-1.212467608	2.10E-17	6.40E-13	down
FB_Cluster_0	ENSMUSG00000026104	Stat1	0.416218744	0.9344079	1078	775	0.079	0.209	1.166518346	2.18E-17	6.63E-13	up
FB_Cluster_0	ENSMUSG00000002416	Ndufb2	2.091086746	1.296126512	1078	775	0.327	0.284	-0.690004056	2.28E-17	6.96E-13	down
FB_Cluster_0	ENSMUSG00000026814	Eng	1.456809674	1.917773774	1078	775	0.253	0.401	0.396596337	2.37E-17	7.23E-13	up
FB_Cluster_0	ENSMUSG00000035248	Tut7	1.023632284	1.494835671	1078	775	0.191	0.333	0.546244919	2.60E-17	7.92E-13	up
FB_Cluster_0	ENSMUSG00000050310	Rictor	0.697355615	1.112997547	1078	775	0.133	0.261	0.674406715	2.70E-17	8.22E-13	up
FB_Cluster_0	ENSMUSG00000062054	Iah1	0.766497414	1.107521696	1078	775	0.14	0.259	0.530924182	2.74E-17	8.36E-13	up
FB_Cluster_0	ENSMUSG00000074884	Serf2	3.346429364	2.20622778	1078	775	0.468	0.422	-0.601018534	2.75E-17	8.39E-13	down
FB_Cluster_0	ENSMUSG00000029163	Emilin1	1.892669322	2.715434198	1078	775	0.3	0.479	0.520737436	2.78E-17	8.48E-13	up
FB_Cluster_0	ENSMUSG00000028116	Myoz2	1.652747729	0.808890171	1078	775	0.266	0.185	-1.030759741	3.22E-17	9.81E-13	down
FB_Cluster_0	ENSMUSG00000071528	Atp5md	3.497032823	2.401090218	1078	775	0.494	0.45	-0.542422895	3.45E-17	1.05E-12	down
FB_Cluster_0	ENSMUSG00000026504	Sdccag8	1.194560403	1.811371089	1078	775	0.212	0.373	0.600561208	3.88E-17	1.18E-12	up
FB_Cluster_0	ENSMUSG00000020160	Meis1	1.735609334	2.801313466	1078	775	0.288	0.48	0.690629558	4.06E-17	1.24E-12	up
FB_Cluster_0	ENSMUSG00000061904	Slc25a3	4.032786251	2.694266205	1078	775	0.543	0.486	-0.581866767	4.40E-17	1.34E-12	down
FB_Cluster_0	ENSMUSG00000090862	Rps13	3.758288872	2.400225226	1078	775	0.521	0.436	-0.646884454	4.68E-17	1.43E-12	down
FB_Cluster_0	ENSMUSG00000058569	Tmed9	2.954662961	2.275226952	1078	775	0.434	0.449	-0.37696853	5.38E-17	1.64E-12	down
FB_Cluster_0	ENSMUSG00000007892	Rplp1	7.170370137	5.367025739	1078	775	0.711	0.695	-0.417918026	5.83E-17	1.78E-12	down
FB_Cluster_0	ENSMUSG00000004562	Arhgef40	1.174201096	1.64288482	1078	775	0.219	0.368	0.484516781	6.02E-17	1.83E-12	up
FB_Cluster_0	ENSMUSG00000015656	Hspa8	4.287065064	3.163713421	1078	775	0.562	0.539	-0.438359442	7.69E-17	2.34E-12	down
FB_Cluster_0	ENSMUSG00000038773	Kdm3b	0.821714388	1.121406433	1078	775	0.145	0.257	0.448553401	8.22E-17	2.51E-12	up
FB_Cluster_0	ENSMUSG00000029683	Lmod2	1.401443902	0.658470551	1078	775	0.242	0.16	-1.089607029	8.27E-17	2.52E-12	down
FB_Cluster_0	ENSMUSG00000056629	Fkbp2	1.377246572	0.896417731	1078	775	0.243	0.227	-0.619487598	8.58E-17	2.62E-12	down
FB_Cluster_0	ENSMUSG00000006333	Rps9	4.01846899	2.919224438	1078	775	0.547	0.526	-0.461047297	8.97E-17	2.73E-12	down
FB_Cluster_0	ENSMUSG00000029823	Luc7l2	4.904336474	6.594618191	1078	775	0.618	0.801	0.427223632	9.14E-17	2.79E-12	up
FB_Cluster_0	ENSMUSG00000001891	Ugp2	2.24824133	1.544225917	1078	775	0.352	0.335	-0.54188382	9.18E-17	2.80E-12	down
FB_Cluster_0	ENSMUSG00000028134	Ptbp2	0.907536136	1.461899538	1078	775	0.17	0.317	0.687756902	9.59E-17	2.92E-12	up
FB_Cluster_0	ENSMUSG00000086782	E130102H24Rik	1.431243335	2.383229603	1078	775	0.263	0.45	0.735608711	9.70E-17	2.96E-12	up
FB_Cluster_0	ENSMUSG00000040033	Stat2	0.525089087	1.20941247	1078	775	0.097	0.241	1.2035168	1.09E-16	3.31E-12	up
FB_Cluster_0	ENSMUSG00000005161	Prdx2	1.619011974	0.944399916	1078	775	0.276	0.226	-0.777580189	1.12E-16	3.41E-12	down
FB_Cluster_0	ENSMUSG00000032575	Manf	3.044814774	1.856840547	1078	775	0.435	0.359	-0.713474222	1.12E-16	3.42E-12	down
FB_Cluster_0	ENSMUSG00000004677	Myo9b	0.622946984	0.812962583	1078	775	0.12	0.21	0.384025441	1.53E-16	4.65E-12	up
FB_Cluster_0	ENSMUSG00000033565	Rbfox2	1.854166313	2.411054799	1078	775	0.315	0.472	0.378875815	1.53E-16	4.66E-12	up
FB_Cluster_0	ENSMUSG00000010608	Rbm25	2.139982665	2.848277866	1078	775	0.344	0.517	0.412474022	1.58E-16	4.82E-12	up
FB_Cluster_0	ENSMUSG00000055932	Fto	1.602448894	2.151368585	1078	775	0.271	0.43	0.4249534	1.59E-16	4.86E-12	up
FB_Cluster_0	ENSMUSG00000028495	Rps6	1.890265994	1.319402105	1078	775	0.301	0.295	-0.518671929	1.62E-16	4.93E-12	down
FB_Cluster_0	ENSMUSG00000040713	Creg1	1.560163738	1.071204421	1078	775	0.262	0.25	-0.542421421	1.67E-16	5.10E-12	down
FB_Cluster_0	ENSMUSG00000000530	Acvrl1	1.354419888	0.982635938	1078	775	0.228	0.239	-0.462905857	1.71E-16	5.20E-12	down
FB_Cluster_0	ENSMUSG00000025887	Casp12	0.604622277	0.961622917	1078	775	0.12	0.236	0.669348572	1.73E-16	5.29E-12	up
FB_Cluster_0	ENSMUSG00000026032	Ndufb3	1.862215236	1.043078896	1078	775	0.308	0.232	-0.836110711	1.75E-16	5.33E-12	down
FB_Cluster_0	ENSMUSG00000037965	Zc3h7a	0.991217738	1.497021953	1078	775	0.181	0.325	0.594772296	1.82E-16	5.56E-12	up
FB_Cluster_0	ENSMUSG00000040462	Os9	1.80558531	1.341664651	1078	775	0.295	0.299	-0.428414844	2.03E-16	6.20E-12	down
FB_Cluster_0	ENSMUSG00000041881	Ndufa7	2.393235026	1.418925509	1078	775	0.354	0.297	-0.75412184	2.12E-16	6.48E-12	down
FB_Cluster_0	ENSMUSG00000021838	Samd4	1.384526193	2.042767677	1078	775	0.231	0.394	0.561099214	2.19E-16	6.67E-12	up
FB_Cluster_0	ENSMUSG00000040423	Rc3h1	1.031951181	1.504562347	1078	775	0.186	0.33	0.543925258	2.22E-16	6.76E-12	up
FB_Cluster_0	ENSMUSG00000005360	Slc1a3	0.597844287	1.079393568	1078	775	0.105	0.231	0.852271674	2.22E-16	6.78E-12	up
FB_Cluster_0	ENSMUSG00000024914	Drap1	1.928132339	1.295315877	1078	775	0.313	0.299	-0.573863565	2.30E-16	7.02E-12	down
FB_Cluster_0	ENSMUSG00000011171	Vipr2	0.316741696	0.866654074	1078	775	0.068	0.197	1.451860506	2.33E-16	7.09E-12	up
FB_Cluster_0	ENSMUSG00000068874	Selenbp1	0.882511886	1.33454583	1078	775	0.163	0.293	0.596605869	2.64E-16	8.04E-12	up
FB_Cluster_0	ENSMUSG00000005873	Reep5	2.43622265	1.625811017	1078	775	0.399	0.355	-0.583456903	2.72E-16	8.30E-12	down
FB_Cluster_0	ENSMUSG00000052911	Lamb2	2.603071944	1.674153604	1078	775	0.383	0.341	-0.636752534	2.74E-16	8.34E-12	down
FB_Cluster_0	ENSMUSG00000040296	Ddx58	0.45109482	0.779789675	1078	775	0.085	0.19	0.789519545	2.77E-16	8.46E-12	up
FB_Cluster_0	ENSMUSG00000031613	Hpgd	0.234007689	0.874242582	1078	775	0.045	0.16	1.901026344	2.87E-16	8.75E-12	up
FB_Cluster_0	ENSMUSG00000027210	Meis2	2.445810281	3.150997424	1078	775	0.359	0.529	0.365482874	3.03E-16	9.24E-12	up
FB_Cluster_0	ENSMUSG00000049775	Tmsb4x	4.497297491	3.085281868	1078	775	0.564	0.516	-0.54364134	3.15E-16	9.59E-12	down
FB_Cluster_0	ENSMUSG00000000538	Tom1l2	0.707691005	1.211632688	1078	775	0.134	0.271	0.775676137	3.32E-16	1.01E-11	up
FB_Cluster_0	ENSMUSG00000058997	Vwa8	0.90581821	1.393246731	1078	775	0.163	0.302	0.621101604	3.40E-16	1.04E-11	up
FB_Cluster_0	ENSMUSG00000073889	Il11ra1	2.120209406	1.234154774	1078	775	0.344	0.277	-0.780634581	3.53E-16	1.08E-11	down
FB_Cluster_0	ENSMUSG00000021390	Ogn	15.22505671	11.04875308	1078	775	0.898	0.834	-0.462560458	3.71E-16	1.13E-11	down
FB_Cluster_0	ENSMUSG00000040415	Dtx3	0.509341253	0.90412939	1078	775	0.1	0.218	0.827773021	3.84E-16	1.17E-11	up
FB_Cluster_0	ENSMUSG00000047675	Rps8	8.021430359	5.691554175	1078	775	0.741	0.679	-0.495029496	4.07E-16	1.24E-11	down
FB_Cluster_0	ENSMUSG00000021134	Srsf5	1.379364122	1.900029912	1078	775	0.249	0.4	0.461990124	4.20E-16	1.28E-11	up
FB_Cluster_0	ENSMUSG00000071014	Ndufb6	1.595061119	0.88255613	1078	775	0.255	0.21	-0.853778751	4.25E-16	1.29E-11	down
FB_Cluster_0	ENSMUSG00000026034	Clk1	1.28188906	1.781540447	1078	775	0.238	0.385	0.474822265	4.25E-16	1.29E-11	up
FB_Cluster_0	ENSMUSG00000020386	Sar1b	1.018625465	0.528567624	1078	775	0.193	0.147	-0.946332432	4.25E-16	1.30E-11	down
FB_Cluster_0	ENSMUSG00000037710	Cisd1	1.893695895	0.934250926	1078	775	0.297	0.203	-1.019244443	4.74E-16	1.44E-11	down
FB_Cluster_0	ENSMUSG00000028556	Dock7	1.773617686	2.287688063	1078	775	0.299	0.446	0.367177009	5.18E-16	1.58E-11	up
FB_Cluster_0	ENSMUSG00000057137	Tmem140	0.770215603	1.187624932	1078	775	0.147	0.275	0.624679204	6.01E-16	1.83E-11	up
FB_Cluster_0	ENSMUSG00000023150	Ivns1abp	1.547734081	1.045839442	1078	775	0.263	0.244	-0.565451507	6.44E-16	1.96E-11	down
FB_Cluster_0	ENSMUSG00000003970	Rpl8	4.051046463	2.762711028	1078	775	0.544	0.489	-0.552193357	6.80E-16	2.07E-11	down
FB_Cluster_0	ENSMUSG00000078671	Chd2	1.955412749	2.585997858	1078	775	0.31	0.475	0.403229926	7.34E-16	2.24E-11	up
FB_Cluster_0	ENSMUSG00000005683	Cs	1.097255348	0.852265076	1078	775	0.199	0.217	-0.364487391	7.60E-16	2.31E-11	down
FB_Cluster_0	ENSMUSG00000021981	Cab39l	0.988868063	1.475504706	1078	775	0.169	0.303	0.577310457	7.83E-16	2.39E-11	up
FB_Cluster_0	ENSMUSG00000021327	Zkscan3	0.961982996	1.336818714	1078	775	0.185	0.311	0.474678488	8.02E-16	2.45E-11	up
FB_Cluster_0	ENSMUSG00000020949	Fkbp3	1.538112917	0.846614015	1078	775	0.254	0.199	-0.861308539	8.02E-16	2.45E-11	down
FB_Cluster_0	ENSMUSG00000026554	Dcaf8	1.083336177	1.448693241	1078	775	0.198	0.321	0.419237551	8.85E-16	2.70E-11	up
FB_Cluster_0	ENSMUSG00000064127	Med14	0.731339739	0.964053629	1078	775	0.134	0.232	0.398524034	9.00E-16	2.74E-11	up
FB_Cluster_0	ENSMUSG00000036461	Elf1	1.264088694	2.021238127	1078	775	0.217	0.379	0.677098856	1.04E-15	3.17E-11	up
FB_Cluster_0	ENSMUSG00000015090	Ptgds	0.85333223	0.209340678	1078	775	0.153	0.052	-2.026734919	1.06E-15	3.24E-11	down
FB_Cluster_0	ENSMUSG00000000708	Kat2b	1.584404945	2.421534756	1078	775	0.272	0.445	0.611949124	1.09E-15	3.33E-11	up
FB_Cluster_0	ENSMUSG00000001768	Rin2	1.014956048	1.826841519	1078	775	0.182	0.345	0.847871062	1.26E-15	3.84E-11	up
FB_Cluster_0	ENSMUSG00000039759	Thap3	0.923429477	1.411182813	1078	775	0.169	0.305	0.61177721	1.30E-15	3.96E-11	up
FB_Cluster_0	ENSMUSG00000033487	Fndc3a	2.142759599	2.805324075	1078	775	0.335	0.499	0.388681542	1.40E-15	4.27E-11	up
FB_Cluster_0	ENSMUSG00000021133	Susd6	2.055989496	2.694910403	1078	775	0.33	0.489	0.390387779	1.43E-15	4.35E-11	up
FB_Cluster_0	ENSMUSG00000026977	Marchf7	0.971496575	1.336826267	1078	775	0.175	0.302	0.460490592	1.43E-15	4.37E-11	up
FB_Cluster_0	ENSMUSG00000034377	Tulp4	1.638732222	2.187846527	1078	775	0.28	0.431	0.416909316	1.47E-15	4.47E-11	up
FB_Cluster_0	ENSMUSG00000032231	Anxa2	1.365134319	1.021837949	1078	775	0.237	0.252	-0.417840986	1.60E-15	4.89E-11	down
FB_Cluster_0	ENSMUSG00000047843	Bri3	2.093171844	1.365346544	1078	775	0.34	0.301	-0.616386845	1.62E-15	4.92E-11	down
FB_Cluster_0	ENSMUSG00000018340	Anxa6	0.651088556	0.971332727	1078	775	0.121	0.231	0.577038745	1.77E-15	5.38E-11	up
FB_Cluster_0	ENSMUSG00000050103	Agmo	2.62953577	4.386782976	1078	775	0.337	0.528	0.738333236	1.98E-15	6.04E-11	up
FB_Cluster_0	ENSMUSG00000003949	Hlf	0.533282964	1.111926735	1078	775	0.098	0.23	1.059947821	2.07E-15	6.32E-11	up
FB_Cluster_0	ENSMUSG00000034422	Parp14	0.613595794	1.223745547	1078	775	0.11	0.248	0.995825896	2.09E-15	6.38E-11	up
FB_Cluster_0	ENSMUSG00000037563	Rps16	3.99542229	2.716065031	1078	775	0.541	0.47	-0.556812964	2.11E-15	6.44E-11	down
FB_Cluster_0	ENSMUSG00000028399	Ptprd	3.042855674	4.652609998	1078	775	0.424	0.617	0.612597949	2.12E-15	6.48E-11	up
FB_Cluster_0	ENSMUSG00000016252	Atp5e	5.198569125	3.732274391	1078	775	0.633	0.591	-0.478048628	2.14E-15	6.53E-11	down
FB_Cluster_0	ENSMUSG00000026786	Apbb1ip	1.421265144	2.026251567	1078	775	0.234	0.387	0.511607274	2.14E-15	6.53E-11	up
FB_Cluster_0	ENSMUSG00000033538	Casp4	0.293771272	0.745521665	1078	775	0.059	0.173	1.343259449	2.34E-15	7.13E-11	up
FB_Cluster_0	ENSMUSG00000022403	St13	1.487414658	1.098087002	1078	775	0.258	0.262	-0.437780144	2.37E-15	7.22E-11	down
FB_Cluster_0	ENSMUSG00000052337	Immt	1.883587339	1.194780806	1078	775	0.303	0.266	-0.656692811	2.38E-15	7.26E-11	down
FB_Cluster_0	ENSMUSG00000026502	Desi2	0.972656827	1.362024613	1078	775	0.171	0.297	0.485707588	2.43E-15	7.40E-11	up
FB_Cluster_0	ENSMUSG00000074218	Cox7a1	3.139805553	2.109666076	1078	775	0.462	0.404	-0.573638118	2.83E-15	8.64E-11	down
FB_Cluster_0	ENSMUSG00000036053	Fmnl2	1.469821463	2.153707808	1078	775	0.244	0.405	0.551150444	2.84E-15	8.65E-11	up
FB_Cluster_0	ENSMUSG00000020456	Ogdh	1.993559018	1.541445807	1078	775	0.305	0.332	-0.371040922	2.86E-15	8.71E-11	down
FB_Cluster_0	ENSMUSG00000028771	Ptpn12	1.098839856	1.616145472	1078	775	0.194	0.335	0.556533897	2.86E-15	8.71E-11	up
FB_Cluster_0	ENSMUSG00000022961	Son	5.760196768	7.69041148	1078	775	0.657	0.825	0.416936411	3.03E-15	9.24E-11	up
FB_Cluster_0	ENSMUSG00000021771	Vdac2	1.444014228	0.78281384	1078	775	0.259	0.195	-0.883259411	3.07E-15	9.35E-11	down
FB_Cluster_0	ENSMUSG00000021224	Numb	1.147978796	1.644242595	1078	775	0.207	0.347	0.51828925	3.18E-15	9.69E-11	up
FB_Cluster_0	ENSMUSG00000056870	Gulp1	4.215471221	5.95171	1078	775	0.513	0.701	0.497600339	3.21E-15	9.78E-11	up
FB_Cluster_0	ENSMUSG00000078619	Smarcd2	0.371563251	0.513688594	1078	775	0.072	0.145	0.467178819	3.40E-15	1.04E-10	up
FB_Cluster_0	ENSMUSG00000040037	Negr1	6.339351386	9.024221377	1078	775	0.574	0.752	0.509460451	3.41E-15	1.04E-10	up
FB_Cluster_0	ENSMUSG00000015766	Eps8	0.910182751	1.566607639	1078	775	0.156	0.298	0.783349337	3.61E-15	1.10E-10	up
FB_Cluster_0	ENSMUSG00000116933	Atp5o	1.06678178	1.581025477	1078	775	0.179	0.314	0.567551543	3.96E-15	1.21E-10	up
FB_Cluster_0	ENSMUSG00000031666	Rbl2	0.500606217	0.724130608	1078	775	0.095	0.185	0.53248478	4.60E-15	1.40E-10	up
FB_Cluster_0	ENSMUSG00000029076	Sdf4	1.558952275	1.186460136	1078	775	0.272	0.285	-0.393884083	4.71E-15	1.44E-10	down
FB_Cluster_0	ENSMUSG00000061477	Rps7	3.810319915	2.750755258	1078	775	0.519	0.488	-0.470069763	4.90E-15	1.49E-10	down
FB_Cluster_0	ENSMUSG00000038546	Ranbp9	1.50274264	2.029730738	1078	775	0.264	0.413	0.433665475	5.17E-15	1.58E-10	up
FB_Cluster_0	ENSMUSG00000054728	Phactr1	1.186253974	1.587265796	1078	775	0.199	0.33	0.420100092	5.25E-15	1.60E-10	up
FB_Cluster_0	ENSMUSG00000058318	Phf21a	2.767355536	3.66099335	1078	775	0.404	0.578	0.403714422	5.27E-15	1.61E-10	up
FB_Cluster_0	ENSMUSG00000024121	Atp6v0c	2.395578478	1.538702855	1078	775	0.384	0.324	-0.638625887	5.35E-15	1.63E-10	down
FB_Cluster_0	ENSMUSG00000059534	Uqcr10	2.848677123	1.957408389	1078	775	0.42	0.381	-0.541324265	5.61E-15	1.71E-10	down
FB_Cluster_0	ENSMUSG00000038239	Hrc	1.14629577	0.41001641	1078	775	0.188	0.101	-1.482999814	5.95E-15	1.81E-10	down
FB_Cluster_0	ENSMUSG00000001663	Gstt1	0.794598254	1.088741269	1078	775	0.146	0.25	0.454314573	6.53E-15	1.99E-10	up
FB_Cluster_0	ENSMUSG00000061315	Naca	2.141830909	1.380298817	1078	775	0.339	0.293	-0.633826802	6.79E-15	2.07E-10	down
FB_Cluster_0	ENSMUSG00000022822	Abcc5	0.944576603	1.267065377	1078	775	0.173	0.29	0.42371239	7.89E-15	2.41E-10	up
FB_Cluster_0	ENSMUSG00000018398	Septin8	1.210273756	1.792021571	1078	775	0.228	0.377	0.566215897	8.03E-15	2.45E-10	up
FB_Cluster_0	ENSMUSG00000021338	Carmil1	0.967062669	1.478535946	1078	775	0.18	0.319	0.612436425	8.12E-15	2.48E-10	up
FB_Cluster_0	ENSMUSG00000048758	Rpl29	1.740297695	1.199496038	1078	775	0.284	0.274	-0.536868348	8.20E-15	2.50E-10	down
FB_Cluster_0	ENSMUSG00000024483	Ankhd1	1.875696809	2.532610289	1078	775	0.314	0.476	0.4331785	8.46E-15	2.58E-10	up
FB_Cluster_0	ENSMUSG00000021846	Peli2	0.562988123	1.103544701	1078	775	0.117	0.253	0.970843169	8.76E-15	2.67E-10	up
FB_Cluster_0	ENSMUSG00000025089	Gfra1	2.364639386	3.448449749	1078	775	0.343	0.523	0.544308584	8.83E-15	2.69E-10	up
FB_Cluster_0	ENSMUSG00000004040	Stat3	0.994492207	1.647110098	1078	775	0.188	0.342	0.727847547	9.05E-15	2.76E-10	up
FB_Cluster_0	ENSMUSG00000049760	Micos13	1.276777463	0.73875504	1078	775	0.215	0.178	-0.789256836	9.24E-15	2.82E-10	down
FB_Cluster_0	ENSMUSG00000020070	Rufy2	0.809396936	1.047428053	1078	775	0.143	0.24	0.371891355	9.79E-15	2.98E-10	up
FB_Cluster_0	ENSMUSG00000024608	Rps14	4.21556443	2.934761691	1078	775	0.558	0.498	-0.522467516	9.91E-15	3.02E-10	down
FB_Cluster_0	ENSMUSG00000015575	Atp6v0e	1.840145705	1.363675242	1078	775	0.297	0.298	-0.432292505	1.05E-14	3.19E-10	down
FB_Cluster_0	ENSMUSG00000011257	Pabpc4	0.572412515	0.86055166	1078	775	0.109	0.212	0.588122209	1.09E-14	3.33E-10	up
FB_Cluster_0	ENSMUSG00000030231	Plekha5	2.464560875	3.397826153	1078	775	0.388	0.564	0.463265346	1.10E-14	3.35E-10	up
FB_Cluster_0	ENSMUSG00000067212	H2-T23	1.075025614	1.483290042	1078	775	0.187	0.314	0.46439276	1.12E-14	3.43E-10	up
FB_Cluster_0	ENSMUSG00000027201	Myef2	0.618249372	0.892099778	1078	775	0.109	0.205	0.528944587	1.15E-14	3.50E-10	up
FB_Cluster_0	ENSMUSG00000020694	Tlk2	0.984009433	1.269297458	1078	775	0.185	0.295	0.367253202	1.15E-14	3.51E-10	up
FB_Cluster_0	ENSMUSG00000046027	Stard5	0.43970222	0.584801866	1078	775	0.082	0.154	0.411339705	1.19E-14	3.62E-10	up
FB_Cluster_0	ENSMUSG00000024043	Arhgap28	0.816738831	1.399611442	1078	775	0.133	0.265	0.777006083	1.21E-14	3.69E-10	up
FB_Cluster_0	ENSMUSG00000092397	C130080G10Rik	0.702732727	0.158505731	1078	775	0.13	0.041	-2.147736466	1.23E-14	3.75E-10	down
FB_Cluster_0	ENSMUSG00000002015	Bcap31	1.531054062	1.168423236	1078	775	0.265	0.275	-0.389933029	1.25E-14	3.81E-10	down
FB_Cluster_0	ENSMUSG00000006920	Ezh1	0.71699796	0.944846122	1078	775	0.138	0.234	0.398061861	1.26E-14	3.83E-10	up
FB_Cluster_0	ENSMUSG00000062397	Zfp706	0.947233656	0.591485026	1078	775	0.169	0.155	-0.679287103	1.43E-14	4.35E-10	down
FB_Cluster_0	ENSMUSG00000058470	Gm8369	0.663646676	1.209859585	1078	775	0.117	0.246	0.866254223	1.43E-14	4.35E-10	up
FB_Cluster_0	ENSMUSG00000078247	Airn	10.11894625	13.18133416	1078	775	0.763	0.895	0.381434028	1.43E-14	4.37E-10	up
FB_Cluster_0	ENSMUSG00000050708	Ftl1	6.979395373	5.384610966	1078	775	0.696	0.694	-0.374253824	1.48E-14	4.52E-10	down
FB_Cluster_0	ENSMUSG00000022637	Cblb	1.798950857	2.52512503	1078	775	0.301	0.467	0.489175986	1.50E-14	4.56E-10	up
FB_Cluster_0	ENSMUSG00000019907	Ppp1r12a	2.019285224	2.649358748	1078	775	0.335	0.492	0.391781515	1.54E-14	4.68E-10	up
FB_Cluster_0	ENSMUSG00000039103	Nexn	2.341106899	1.398655003	1078	775	0.349	0.281	-0.743109144	1.54E-14	4.70E-10	down
FB_Cluster_0	ENSMUSG00000001289	Pfdn5	1.688614286	0.854295433	1078	775	0.284	0.195	-0.982949419	1.54E-14	4.70E-10	down
FB_Cluster_0	ENSMUSG00000059142	Zfp945	0.359765648	0.536360058	1078	775	0.071	0.146	0.576012365	1.55E-14	4.71E-10	up
FB_Cluster_0	ENSMUSG00000004951	Hspb1	1.622185928	0.908687786	1078	775	0.269	0.206	-0.836012767	1.59E-14	4.84E-10	down
FB_Cluster_0	ENSMUSG00000026434	Nucks1	1.085677954	0.838611374	1078	775	0.191	0.214	-0.372482771	1.69E-14	5.14E-10	down
FB_Cluster_0	ENSMUSG00000047215	Rpl9	5.244274765	3.961438977	1078	775	0.615	0.613	-0.404709788	1.70E-14	5.19E-10	down
FB_Cluster_0	ENSMUSG00000025290	Rps24	5.526486551	4.023860979	1078	775	0.634	0.604	-0.457772372	1.71E-14	5.21E-10	down
FB_Cluster_0	ENSMUSG00000046364	Rpl27a	4.656557995	3.486369865	1078	775	0.589	0.564	-0.417527916	1.88E-14	5.73E-10	down
FB_Cluster_0	ENSMUSG00000006717	Acot13	1.864311423	0.980268472	1078	775	0.303	0.212	-0.927324263	1.91E-14	5.83E-10	down
FB_Cluster_0	ENSMUSG00000031093	Dock11	0.818909852	1.403946309	1078	775	0.153	0.294	0.777637809	1.99E-14	6.08E-10	up
FB_Cluster_0	ENSMUSG00000037369	Kdm6a	0.880339147	1.263040493	1078	775	0.162	0.283	0.520719913	2.03E-14	6.20E-10	up
FB_Cluster_0	ENSMUSG00000037916	Ndufv1	1.368783874	0.708981199	1078	775	0.248	0.175	-0.948977315	2.10E-14	6.39E-10	down
FB_Cluster_0	ENSMUSG00000020305	Asb3	1.189932922	1.753618113	1078	775	0.214	0.361	0.559415387	2.10E-14	6.40E-10	up
FB_Cluster_0	ENSMUSG00000023186	Vwa5a	0.523787611	0.716506398	1078	775	0.097	0.179	0.451923579	2.16E-14	6.60E-10	up
FB_Cluster_0	ENSMUSG00000030067	Foxp1	1.265279896	1.764747951	1078	775	0.222	0.36	0.479973315	2.19E-14	6.67E-10	up
FB_Cluster_0	ENSMUSG00000108563	Gm44686	0.922163027	1.23662488	1078	775	0.162	0.277	0.423274428	2.44E-14	7.44E-10	up
FB_Cluster_0	ENSMUSG00000005656	Snx6	0.896808518	1.166822664	1078	775	0.168	0.276	0.379676205	2.51E-14	7.64E-10	up
FB_Cluster_0	ENSMUSG00000038664	Herc1	1.996237539	2.61909981	1078	775	0.324	0.483	0.391770451	2.51E-14	7.66E-10	up
FB_Cluster_0	ENSMUSG00000055065	Ddx17	1.928844591	2.774850305	1078	775	0.334	0.506	0.524650233	2.61E-14	7.94E-10	up
FB_Cluster_0	ENSMUSG00000068798	Rap1a	1.369890901	1.78910334	1078	775	0.244	0.381	0.385151046	2.72E-14	8.28E-10	up
FB_Cluster_0	ENSMUSG00000015341	Golga7	0.362080097	0.491744841	1078	775	0.07	0.137	0.441496002	2.76E-14	8.41E-10	up
FB_Cluster_0	ENSMUSG00000029647	Pan3	1.632236667	2.226557485	1078	775	0.29	0.444	0.447941011	2.76E-14	8.41E-10	up
FB_Cluster_0	ENSMUSG00000048249	Crebrf	0.980460626	1.623605269	1078	775	0.183	0.328	0.727611045	3.09E-14	9.41E-10	up
FB_Cluster_0	ENSMUSG00000037465	Klf10	0.40985062	0.910465018	1078	775	0.08	0.2	1.151311892	3.12E-14	9.50E-10	up
FB_Cluster_0	ENSMUSG00000009927	Rps25	2.118801468	1.521341546	1078	775	0.347	0.325	-0.477877596	3.43E-14	1.04E-09	down
FB_Cluster_0	ENSMUSG00000020115	Tbk1	0.557186762	0.808720704	1078	775	0.107	0.201	0.537400044	3.65E-14	1.11E-09	up
FB_Cluster_0	ENSMUSG00000050856	Atp5k	3.712494874	2.661945383	1078	775	0.492	0.472	-0.479892727	3.74E-14	1.14E-09	down
FB_Cluster_0	ENSMUSG00000020728	Cep112	1.761205935	2.384641468	1078	775	0.287	0.439	0.437187347	3.86E-14	1.18E-09	up
FB_Cluster_0	ENSMUSG00000090266	Mettl23	0.916493598	0.624343632	1078	775	0.163	0.161	-0.553710862	3.86E-14	1.18E-09	down
FB_Cluster_0	ENSMUSG00000017119	Nbr1	0.755124077	0.98888183	1078	775	0.136	0.231	0.389039256	3.97E-14	1.21E-09	up
FB_Cluster_0	ENSMUSG00000078190	Dnm3os	1.038950003	1.559212436	1078	775	0.186	0.324	0.585644943	4.11E-14	1.25E-09	up
FB_Cluster_0	ENSMUSG00000003228	Grk5	1.560076262	2.139361186	1078	775	0.267	0.417	0.455538477	4.11E-14	1.25E-09	up
FB_Cluster_0	ENSMUSG00000070565	Rasal2	1.198696095	1.605703856	1078	775	0.192	0.315	0.421709394	4.34E-14	1.32E-09	up
FB_Cluster_0	ENSMUSG00000045672	Col27a1	0.690554077	1.02324858	1078	775	0.126	0.232	0.567262445	4.49E-14	1.37E-09	up
FB_Cluster_0	ENSMUSG00000024048	Myl12a	2.016554283	1.271521017	1078	775	0.34	0.28	-0.665295016	4.60E-14	1.40E-09	down
FB_Cluster_0	ENSMUSG00000029311	Hsd17b11	0.767015653	1.008905611	1078	775	0.141	0.237	0.395418193	4.73E-14	1.44E-09	up
FB_Cluster_0	ENSMUSG00000055296	Tmem245	0.739188958	1.064606168	1078	775	0.136	0.243	0.526245067	4.87E-14	1.48E-09	up
FB_Cluster_0	ENSMUSG00000026664	Phyh	1.234791315	0.64509263	1078	775	0.207	0.152	-0.936582208	5.06E-14	1.54E-09	down
FB_Cluster_0	ENSMUSG00000032294	Pkm	1.580180129	0.933236697	1078	775	0.278	0.222	-0.759710796	5.22E-14	1.59E-09	down
FB_Cluster_0	ENSMUSG00000027346	Gpcpd1	0.854797444	1.297553404	1078	775	0.151	0.276	0.602081832	5.30E-14	1.61E-09	up
FB_Cluster_0	ENSMUSG00000050503	Fbxl22	0.777828245	0.210498695	1078	775	0.144	0.05	-1.885140594	5.34E-14	1.63E-09	down
FB_Cluster_0	ENSMUSG00000021969	Zdhhc20	0.673404387	0.942042883	1078	775	0.129	0.227	0.484258529	5.36E-14	1.63E-09	up
FB_Cluster_0	ENSMUSG00000025980	Hspd1	1.911758268	1.181474499	1078	775	0.303	0.259	-0.694264981	5.45E-14	1.66E-09	down
FB_Cluster_0	ENSMUSG00000003746	Man1a	4.081327882	6.139951305	1078	775	0.51	0.684	0.589176745	5.92E-14	1.81E-09	up
FB_Cluster_0	ENSMUSG00000060961	Slc4a4	0.735638988	1.258760353	1078	775	0.129	0.257	0.774852302	6.17E-14	1.88E-09	up
FB_Cluster_0	ENSMUSG00000057133	Chd6	1.45259487	2.068788144	1078	775	0.246	0.395	0.510123942	6.76E-14	2.06E-09	up
FB_Cluster_0	ENSMUSG00000041308	Sntb2	1.882144144	2.638463502	1078	775	0.318	0.479	0.487298935	6.84E-14	2.08E-09	up
FB_Cluster_0	ENSMUSG00000026696	Vamp4	0.704623654	0.953398844	1078	775	0.131	0.228	0.436173549	6.86E-14	2.09E-09	up
FB_Cluster_0	ENSMUSG00000026688	Mgst3	1.366333474	0.643186203	1078	775	0.24	0.148	-1.086882571	6.91E-14	2.11E-09	down
FB_Cluster_0	ENSMUSG00000026072	Il1r1	2.062462078	2.929291974	1078	775	0.323	0.49	0.506163708	7.15E-14	2.18E-09	up
FB_Cluster_0	ENSMUSG00000042390	Gatad2b	1.132884428	1.515563817	1078	775	0.202	0.323	0.419821759	7.18E-14	2.19E-09	up
FB_Cluster_0	ENSMUSG00000033530	Ttc7b	0.404460652	0.563642165	1078	775	0.074	0.15	0.478679471	7.22E-14	2.20E-09	up
FB_Cluster_0	ENSMUSG00000059208	Hnrnpm	0.984134423	1.302314555	1078	775	0.187	0.302	0.404114848	7.66E-14	2.34E-09	up
FB_Cluster_0	ENSMUSG00000059734	Ndufs8	1.208665275	0.649399453	1078	775	0.209	0.16	-0.896133905	8.32E-14	2.53E-09	down
FB_Cluster_0	ENSMUSG00000060373	Hnrnpc	1.042892762	1.341778086	1078	775	0.201	0.312	0.363524458	8.42E-14	2.57E-09	up
FB_Cluster_0	ENSMUSG00000006519	Cyba	2.721846673	2.104931504	1078	775	0.416	0.414	-0.370796977	8.72E-14	2.66E-09	down
FB_Cluster_0	ENSMUSG00000014668	Chfr	0.6730933	0.923491764	1078	775	0.12	0.213	0.456234488	9.34E-14	2.85E-09	up
FB_Cluster_0	ENSMUSG00000010476	Ebf3	1.061911532	1.420135915	1078	775	0.188	0.303	0.419331164	9.46E-14	2.88E-09	up
FB_Cluster_0	ENSMUSG00000020681	Ace	2.791485143	1.939528658	1078	775	0.413	0.378	-0.525304084	1.00E-13	3.06E-09	down
FB_Cluster_0	ENSMUSG00000035798	Zdhhc17	0.685958938	0.984362775	1078	775	0.127	0.234	0.521004135	1.02E-13	3.09E-09	up
FB_Cluster_0	ENSMUSG00000023923	Tbc1d5	2.071739463	2.706764552	1078	775	0.319	0.476	0.385710479	1.02E-13	3.12E-09	up
FB_Cluster_0	ENSMUSG00000029817	Tra2a	1.476230618	1.944745668	1078	775	0.253	0.392	0.397639833	1.03E-13	3.14E-09	up
FB_Cluster_0	ENSMUSG00000020074	Ccar1	0.899278777	1.307722716	1078	775	0.169	0.289	0.540166241	1.10E-13	3.37E-09	up
FB_Cluster_0	ENSMUSG00000020894	Vamp2	0.450517483	0.604987052	1078	775	0.09	0.164	0.425239423	1.12E-13	3.42E-09	up
FB_Cluster_0	ENSMUSG00000058761	Rnf169	1.122173086	1.690942936	1078	775	0.188	0.325	0.591489516	1.16E-13	3.53E-09	up
FB_Cluster_0	ENSMUSG00000073676	Hspe1	1.604173723	0.90448095	1078	775	0.267	0.205	-0.826598798	1.22E-13	3.71E-09	down
FB_Cluster_0	ENSMUSG00000002996	Hbp1	0.60711696	0.862144756	1078	775	0.116	0.21	0.505885363	1.29E-13	3.93E-09	up
FB_Cluster_0	ENSMUSG00000028329	Xpa	0.459079152	0.663846745	1078	775	0.083	0.164	0.532010388	1.29E-13	3.94E-09	up
FB_Cluster_0	ENSMUSG00000031708	Tecr	1.215059126	0.883246291	1078	775	0.218	0.217	-0.460094227	1.33E-13	4.07E-09	down
FB_Cluster_0	ENSMUSG00000025203	Scd2	1.177749981	0.64213753	1078	775	0.209	0.161	-0.87497692	1.53E-13	4.65E-09	down
FB_Cluster_0	ENSMUSG00000073563	Csnk1g3	1.131522676	1.453861361	1078	775	0.202	0.316	0.361595938	1.61E-13	4.91E-09	up
FB_Cluster_0	ENSMUSG00000115317	Gm32618	0.711622653	1.06393161	1078	775	0.128	0.24	0.580153951	1.65E-13	5.02E-09	up
FB_Cluster_0	ENSMUSG00000030921	Trim30a	0.328518422	0.630649341	1078	775	0.061	0.152	0.940653436	1.66E-13	5.07E-09	up
FB_Cluster_0	ENSMUSG00000026014	Raph1	1.994408578	2.741273289	1078	775	0.32	0.481	0.458865463	1.68E-13	5.12E-09	up
FB_Cluster_0	ENSMUSG00000038633	Degs1	1.323689292	0.90981341	1078	775	0.24	0.222	-0.540872341	1.78E-13	5.44E-09	down
FB_Cluster_0	ENSMUSG00000097462	9530026P05Rik	2.116757689	3.075877819	1078	775	0.27	0.428	0.539120816	1.79E-13	5.47E-09	up
FB_Cluster_0	ENSMUSG00000056501	Cebpb	1.151018197	0.680728102	1078	775	0.212	0.17	-0.757673484	1.88E-13	5.72E-09	down
FB_Cluster_0	ENSMUSG00000038065	Mturn	0.378219068	0.567692453	1078	775	0.07	0.148	0.585760181	1.91E-13	5.84E-09	up
FB_Cluster_0	ENSMUSG00000023456	Tpi1	1.32759253	0.683121654	1078	775	0.239	0.161	-0.958495478	1.99E-13	6.06E-09	down
FB_Cluster_0	ENSMUSG00000029432	Nipsnap2	1.613295982	1.196909759	1078	775	0.274	0.281	-0.430665654	2.06E-13	6.29E-09	down
FB_Cluster_0	ENSMUSG00000021577	Sdha	2.18155129	1.497598003	1078	775	0.354	0.317	-0.542673777	2.08E-13	6.35E-09	down
FB_Cluster_0	ENSMUSG00000028367	Txn1	0.913655408	0.700790121	1078	775	0.16	0.177	-0.38261975	2.11E-13	6.42E-09	down
FB_Cluster_0	ENSMUSG00000021313	Ryr2	1.784070836	1.104146672	1078	775	0.279	0.235	-0.692191278	2.19E-13	6.66E-09	down
FB_Cluster_0	ENSMUSG00000031461	Myom2	1.345775615	0.70660426	1078	775	0.237	0.165	-0.929366572	2.20E-13	6.70E-09	down
FB_Cluster_0	ENSMUSG00000068523	Gng5	1.673491173	1.043311428	1078	775	0.276	0.236	-0.681639008	2.23E-13	6.79E-09	down
FB_Cluster_0	ENSMUSG00000056268	Dennd1b	1.387666908	1.831066787	1078	775	0.242	0.373	0.399997931	2.29E-13	6.98E-09	up
FB_Cluster_0	ENSMUSG00000027803	Wwtr1	1.235751403	1.705426888	1078	775	0.22	0.351	0.464712213	2.30E-13	7.01E-09	up
FB_Cluster_0	ENSMUSG00000022197	Pdzd2	2.020545878	3.166364707	1078	775	0.306	0.477	0.64805649	2.40E-13	7.33E-09	up
FB_Cluster_0	ENSMUSG00000022914	Brwd1	1.130181404	1.452300255	1078	775	0.216	0.328	0.361757087	2.43E-13	7.41E-09	up
FB_Cluster_0	ENSMUSG00000061410	Zcchc14	0.495115732	0.763317689	1078	775	0.093	0.185	0.624415469	2.57E-13	7.82E-09	up
FB_Cluster_0	ENSMUSG00000033684	Qsox1	0.603130556	0.787747072	1078	775	0.122	0.204	0.385206108	2.69E-13	8.20E-09	up
FB_Cluster_0	ENSMUSG00000040940	Arhgef1	0.684855479	1.003322644	1078	775	0.135	0.241	0.550847278	2.71E-13	8.26E-09	up
FB_Cluster_0	ENSMUSG00000022883	Robo1	0.940436611	1.615109977	1078	775	0.156	0.295	0.78016572	2.74E-13	8.36E-09	up
FB_Cluster_0	ENSMUSG00000032959	Pebp1	1.486430876	0.901331501	1078	775	0.264	0.21	-0.721659658	2.79E-13	8.50E-09	down
FB_Cluster_0	ENSMUSG00000032649	Colgalt2	1.619009311	1.238686982	1078	775	0.261	0.276	-0.386272262	2.81E-13	8.58E-09	down
FB_Cluster_0	ENSMUSG00000039967	Zfp292	1.086977506	1.604321988	1078	775	0.204	0.338	0.561598839	2.85E-13	8.70E-09	up
FB_Cluster_0	ENSMUSG00000027332	Ivd	0.786701867	0.31667452	1078	775	0.144	0.088	-1.312544087	2.92E-13	8.91E-09	down
FB_Cluster_0	ENSMUSG00000027947	Il6ra	0.636593682	0.887281193	1078	775	0.122	0.215	0.478954529	3.06E-13	9.32E-09	up
FB_Cluster_0	ENSMUSG00000032328	Tmem30a	1.709247992	1.238593455	1078	775	0.297	0.285	-0.464626932	3.07E-13	9.35E-09	down
FB_Cluster_0	ENSMUSG00000024240	Epc1	1.191354097	1.547749744	1078	775	0.212	0.333	0.37754206	3.07E-13	9.35E-09	up
FB_Cluster_0	ENSMUSG00000017969	Ptgis	2.891164452	2.143928461	1078	775	0.429	0.415	-0.431376515	3.12E-13	9.50E-09	down
FB_Cluster_0	ENSMUSG00000037286	Stag1	4.589028177	6.030808059	1078	775	0.582	0.75	0.394155139	3.30E-13	1.01E-08	up
FB_Cluster_0	ENSMUSG00000001774	Chordc1	1.010487188	0.648916655	1078	775	0.188	0.172	-0.638866389	3.31E-13	1.01E-08	down
FB_Cluster_0	ENSMUSG00000037152	Ndufc1	2.848443022	2.158033642	1078	775	0.416	0.41	-0.400439989	3.33E-13	1.01E-08	down
FB_Cluster_0	ENSMUSG00000039428	Tmem135	0.787777998	1.171561763	1078	775	0.151	0.267	0.572511997	3.55E-13	1.08E-08	up
FB_Cluster_0	ENSMUSG00000021047	Nova1	0.824990089	1.484886855	1078	775	0.142	0.277	0.847826604	3.69E-13	1.13E-08	up
FB_Cluster_0	ENSMUSG00000026737	Pip4k2a	0.839673366	1.27329418	1078	775	0.156	0.277	0.600607137	3.85E-13	1.17E-08	up
FB_Cluster_0	ENSMUSG00000071866	Ppia	2.845502812	1.898186135	1078	775	0.439	0.379	-0.584036835	3.94E-13	1.20E-08	down
FB_Cluster_0	ENSMUSG00000019158	Tmem160	1.206250315	0.680844061	1078	775	0.209	0.168	-0.825040724	3.97E-13	1.21E-08	down
FB_Cluster_0	ENSMUSG00000028476	Reck	0.876305344	1.187922492	1078	775	0.158	0.265	0.438891964	3.98E-13	1.21E-08	up
FB_Cluster_0	ENSMUSG00000061731	Ext1	4.286417032	5.640728537	1078	775	0.51	0.681	0.396101208	4.02E-13	1.23E-08	up
FB_Cluster_0	ENSMUSG00000042682	Selenok	2.478310362	1.827467292	1078	775	0.4	0.381	-0.439490553	4.07E-13	1.24E-08	down
FB_Cluster_0	ENSMUSG00000024985	Tcf7l2	1.760850199	2.264698282	1078	775	0.3	0.437	0.363028451	4.18E-13	1.27E-08	up
FB_Cluster_0	ENSMUSG00000058546	Rpl23a	2.665483496	1.95156532	1078	775	0.402	0.386	-0.449745699	4.25E-13	1.29E-08	down
FB_Cluster_0	ENSMUSG00000046314	Stxbp6	1.357865619	2.175176773	1078	775	0.209	0.357	0.679752021	4.41E-13	1.34E-08	up
FB_Cluster_0	ENSMUSG00000035933	Cog5	1.290388845	1.840733678	1078	775	0.228	0.366	0.512441612	4.44E-13	1.35E-08	up
FB_Cluster_0	ENSMUSG00000013701	Timm23	1.463769756	0.935575605	1078	775	0.25	0.217	-0.645706855	4.49E-13	1.37E-08	down
FB_Cluster_0	ENSMUSG00000062908	Acadm	2.803611221	2.136536016	1078	775	0.429	0.422	-0.391996601	4.53E-13	1.38E-08	down
FB_Cluster_0	ENSMUSG00000004383	Large1	2.425510826	3.155413258	1078	775	0.352	0.51	0.379526587	4.61E-13	1.40E-08	up
FB_Cluster_0	ENSMUSG00000025410	Dctn2	0.33422812	0.457792288	1078	775	0.066	0.13	0.453743564	4.82E-13	1.47E-08	up
FB_Cluster_0	ENSMUSG00000050730	Arhgap42	1.718045736	2.288716218	1078	775	0.286	0.431	0.413749212	4.89E-13	1.49E-08	up
FB_Cluster_0	ENSMUSG00000020863	Luc7l3	1.188830425	1.635875614	1078	775	0.214	0.345	0.460486951	5.20E-13	1.58E-08	up
FB_Cluster_0	ENSMUSG00000045128	Rpl18a	4.314436305	2.97720627	1078	775	0.575	0.495	-0.535197881	5.25E-13	1.60E-08	down
FB_Cluster_0	ENSMUSG00000096145	Vkorc1	1.609813004	1.236510742	1078	775	0.276	0.279	-0.380591287	5.27E-13	1.61E-08	down
FB_Cluster_0	ENSMUSG00000054428	Atpif1	1.862101119	1.196648546	1078	775	0.3	0.258	-0.637888839	5.52E-13	1.68E-08	down
FB_Cluster_0	ENSMUSG00000025184	R3hcc1l	0.550882349	0.757623216	1078	775	0.1	0.186	0.459664849	6.05E-13	1.84E-08	up
FB_Cluster_0	ENSMUSG00000054203	Ifi205	3.705619518	5.098958106	1078	775	0.455	0.63	0.460477089	6.35E-13	1.93E-08	up
FB_Cluster_0	ENSMUSG00000019579	Mydgf	1.31428884	0.866444934	1078	775	0.234	0.21	-0.60104567	6.50E-13	1.98E-08	down
FB_Cluster_0	ENSMUSG00000038900	Rpl12	2.354623341	1.766814643	1078	775	0.365	0.359	-0.414325219	6.53E-13	1.99E-08	down
FB_Cluster_0	ENSMUSG00000060938	Rpl26	3.426018581	2.582423416	1078	775	0.482	0.471	-0.407793655	6.56E-13	2.00E-08	down
FB_Cluster_0	ENSMUSG00000106218	Gm43713	0.526026403	0.826914819	1078	775	0.096	0.19	0.652503729	6.88E-13	2.10E-08	up
FB_Cluster_0	ENSMUSG00000028245	Nsmaf	0.644941261	0.987261485	1078	775	0.124	0.228	0.614186922	6.92E-13	2.11E-08	up
FB_Cluster_0	ENSMUSG00000040987	Mill2	1.643150909	2.144181715	1078	775	0.281	0.418	0.383941676	7.09E-13	2.16E-08	up
FB_Cluster_0	ENSMUSG00000007041	Clic1	1.588610149	1.049892794	1078	775	0.274	0.241	-0.59747651	7.38E-13	2.25E-08	down
FB_Cluster_0	ENSMUSG00000031508	Ankrd10	0.570026489	0.821344323	1078	775	0.11	0.203	0.52688076	7.70E-13	2.35E-08	up
FB_Cluster_0	ENSMUSG00000022425	Enpp2	3.319129661	4.447030314	1078	775	0.441	0.609	0.422026226	7.78E-13	2.37E-08	up
FB_Cluster_0	ENSMUSG00000025968	Ndufs1	1.607720222	1.098436279	1078	775	0.263	0.244	-0.549523586	7.80E-13	2.38E-08	down
FB_Cluster_0	ENSMUSG00000022100	Xpo7	0.90212645	1.222556446	1078	775	0.172	0.276	0.438457592	7.85E-13	2.39E-08	up
FB_Cluster_0	ENSMUSG00000026586	Prrx1	1.146166946	1.807905619	1078	775	0.199	0.341	0.657456099	8.10E-13	2.47E-08	up
FB_Cluster_0	ENSMUSG00000038127	Ccdc50	1.274066464	1.686736167	1078	775	0.216	0.342	0.404766089	8.30E-13	2.53E-08	up
FB_Cluster_0	ENSMUSG00000031448	Adprhl1	1.531897807	0.740737057	1078	775	0.26	0.163	-1.048186063	8.33E-13	2.54E-08	down
FB_Cluster_0	ENSMUSG00000060904	Arl1	1.751164388	1.253303749	1078	775	0.301	0.283	-0.48254569	8.46E-13	2.58E-08	down
FB_Cluster_0	ENSMUSG00000022090	Pdlim2	0.695389143	0.500096266	1078	775	0.132	0.139	-0.475533706	9.26E-13	2.82E-08	down
FB_Cluster_0	ENSMUSG00000031812	Map1lc3b	1.567667809	1.13488509	1078	775	0.265	0.261	-0.466038563	9.41E-13	2.87E-08	down
FB_Cluster_0	ENSMUSG00000000838	Fmr1	0.852436706	1.124704622	1078	775	0.153	0.255	0.399840572	9.55E-13	2.91E-08	up
FB_Cluster_0	ENSMUSG00000003429	Rps11	3.126488417	2.225026551	1078	775	0.453	0.405	-0.490701926	9.69E-13	2.95E-08	down
FB_Cluster_0	ENSMUSG00000030020	Prickle2	1.258045785	1.710542959	1078	775	0.203	0.321	0.443239574	9.82E-13	2.99E-08	up
FB_Cluster_0	ENSMUSG00000041440	Gk5	1.068514425	1.521742314	1078	775	0.191	0.315	0.510077484	1.03E-12	3.14E-08	up
FB_Cluster_0	ENSMUSG00000059474	Mbtd1	0.997615306	1.287787794	1078	775	0.186	0.29	0.368306793	1.03E-12	3.14E-08	up
FB_Cluster_0	ENSMUSG00000061535	C1qtnf7	4.084068002	5.647859765	1078	775	0.476	0.648	0.467687598	1.04E-12	3.17E-08	up
FB_Cluster_0	ENSMUSG00000020044	Timp3	5.839113403	3.840215711	1078	775	0.597	0.514	-0.604549118	1.04E-12	3.18E-08	down
FB_Cluster_0	ENSMUSG00000005534	Insr	1.040001695	1.523788497	1078	775	0.192	0.32	0.551032751	1.14E-12	3.46E-08	up
FB_Cluster_0	ENSMUSG00000030770	Parva	1.068623979	1.394609487	1078	775	0.196	0.306	0.384075351	1.17E-12	3.55E-08	up
FB_Cluster_0	ENSMUSG00000031696	Vps35	0.971976175	0.693509976	1078	775	0.183	0.185	-0.486944723	1.19E-12	3.62E-08	down
FB_Cluster_0	ENSMUSG00000027598	Itch	1.757865262	2.283817993	1078	775	0.298	0.437	0.377604287	1.31E-12	3.99E-08	up
FB_Cluster_0	ENSMUSG00000005893	Nr2c2	0.955242258	1.235547401	1078	775	0.173	0.276	0.371177535	1.38E-12	4.22E-08	up
FB_Cluster_0	ENSMUSG00000117647	Gm49969	0.733752621	1.153945797	1078	775	0.132	0.246	0.653138215	1.41E-12	4.31E-08	up
FB_Cluster_0	ENSMUSG00000004098	Col5a3	4.564690986	3.138315928	1078	775	0.515	0.463	-0.540512241	1.53E-12	4.67E-08	down
FB_Cluster_0	ENSMUSG00000039891	Txlnb	1.208799258	0.630029308	1078	775	0.212	0.15	-0.939974206	1.53E-12	4.68E-08	down
FB_Cluster_0	ENSMUSG00000028960	Ube4b	0.837457474	1.129767903	1078	775	0.17	0.271	0.431894014	1.55E-12	4.73E-08	up
FB_Cluster_0	ENSMUSG00000051323	Pcdh19	1.830511286	2.430091976	1078	775	0.264	0.401	0.408744805	1.55E-12	4.74E-08	up
FB_Cluster_0	ENSMUSG00000005871	Apc	1.054486937	1.355897385	1078	775	0.188	0.293	0.362676365	1.63E-12	4.98E-08	up
FB_Cluster_0	ENSMUSG00000021987	Mtmr6	0.415504722	0.588039642	1078	775	0.077	0.151	0.500946689	1.65E-12	5.03E-08	up
FB_Cluster_0	ENSMUSG00000034574	Daam1	1.644213391	2.187630713	1078	775	0.264	0.397	0.411949878	1.68E-12	5.11E-08	up
FB_Cluster_0	ENSMUSG00000036854	Hspb6	0.845332907	0.301207827	1078	775	0.154	0.077	-1.488452118	1.69E-12	5.15E-08	down
FB_Cluster_0	ENSMUSG00000016487	Ppfibp1	0.83200525	1.24186026	1078	775	0.164	0.283	0.577781085	1.75E-12	5.32E-08	up
FB_Cluster_0	ENSMUSG00000036568	Bicral	0.796314382	1.053754347	1078	775	0.157	0.253	0.404084306	1.77E-12	5.38E-08	up
FB_Cluster_0	ENSMUSG00000017754	Pltp	0.973920758	1.480895318	1078	775	0.186	0.317	0.604542655	1.80E-12	5.50E-08	up
FB_Cluster_0	ENSMUSG00000029309	Sparcl1	14.33205773	11.13109575	1078	775	0.875	0.859	-0.364647246	1.84E-12	5.62E-08	down
FB_Cluster_0	ENSMUSG00000028369	Svep1	4.259789002	5.809447956	1078	775	0.481	0.652	0.447610072	1.86E-12	5.67E-08	up
FB_Cluster_0	ENSMUSG00000027304	Rtf1	0.847964703	1.106142712	1078	775	0.156	0.254	0.383421707	1.90E-12	5.78E-08	up
FB_Cluster_0	ENSMUSG00000054452	Tle5	1.607717177	1.066100203	1078	775	0.284	0.249	-0.592625007	1.90E-12	5.80E-08	down
FB_Cluster_0	ENSMUSG00000022110	Sucla2	1.748985894	1.084651507	1078	775	0.292	0.24	-0.689236548	1.93E-12	5.89E-08	down
FB_Cluster_0	ENSMUSG00000035863	Palm	0.814795382	1.100957768	1078	775	0.156	0.255	0.434203404	1.97E-12	5.99E-08	up
FB_Cluster_0	ENSMUSG00000026589	Sec16b	0.712932067	1.282263786	1078	775	0.144	0.276	0.846766724	2.02E-12	6.17E-08	up
FB_Cluster_0	ENSMUSG00000020790	Ankfy1	0.598489837	0.834220732	1078	775	0.116	0.203	0.479034311	2.03E-12	6.20E-08	up
FB_Cluster_0	ENSMUSG00000058135	Gstm1	2.868039399	1.990129028	1078	775	0.424	0.375	-0.527180684	2.11E-12	6.44E-08	down
FB_Cluster_0	ENSMUSG00000030432	Rpl28	3.778239789	2.769156134	1078	775	0.529	0.486	-0.448253952	2.13E-12	6.49E-08	down
FB_Cluster_0	ENSMUSG00000029759	Pon3	0.583441425	0.939580013	1078	775	0.117	0.223	0.687334487	2.16E-12	6.57E-08	up
FB_Cluster_0	ENSMUSG00000032384	Csnk1g1	0.86428017	1.359434425	1078	775	0.161	0.288	0.653374802	2.17E-12	6.62E-08	up
FB_Cluster_0	ENSMUSG00000052305	Hbb-bs	0.321436135	0.607904024	1078	775	0.061	0.146	0.919099991	2.22E-12	6.78E-08	up
FB_Cluster_0	ENSMUSG00000053286	Trmt1l	0.505006114	0.724888262	1078	775	0.093	0.177	0.521371132	2.24E-12	6.82E-08	up
FB_Cluster_0	ENSMUSG00000025078	Nhlrc2	0.621553593	1.011554731	1078	775	0.115	0.223	0.702534205	2.36E-12	7.19E-08	up
FB_Cluster_0	ENSMUSG00000072235	Tuba1a	1.41965035	1.022460941	1078	775	0.25	0.241	-0.473450442	2.41E-12	7.35E-08	down
FB_Cluster_0	ENSMUSG00000022587	Ly6e	3.09915353	4.673349802	1078	775	0.442	0.613	0.59256712	2.48E-12	7.55E-08	up
FB_Cluster_0	ENSMUSG00000020844	Nxn	0.988629351	1.272967266	1078	775	0.172	0.271	0.364661085	2.52E-12	7.67E-08	up
FB_Cluster_0	ENSMUSG00000027848	Olfml3	2.466776005	1.698285415	1078	775	0.382	0.343	-0.538521315	2.56E-12	7.81E-08	down
FB_Cluster_0	ENSMUSG00000004558	Ndrg2	1.80223128	1.273965369	1078	775	0.305	0.286	-0.500424911	2.74E-12	8.35E-08	down
FB_Cluster_0	ENSMUSG00000059586	Nsmce2	1.205030007	1.630509847	1078	775	0.212	0.335	0.436222842	2.78E-12	8.49E-08	up
FB_Cluster_0	ENSMUSG00000004044	Cavin1	0.844150202	0.653493387	1078	775	0.151	0.169	-0.369277233	2.80E-12	8.54E-08	down
FB_Cluster_0	ENSMUSG00000062077	Trim54	0.779377385	0.290832915	1078	775	0.137	0.074	-1.421820641	2.80E-12	8.54E-08	down
FB_Cluster_0	ENSMUSG00000033257	Ttll4	0.370529693	0.526032384	1078	775	0.072	0.138	0.505447384	2.92E-12	8.89E-08	up
FB_Cluster_0	ENSMUSG00000047789	Slc38a9	0.684067692	1.07582849	1078	775	0.116	0.222	0.65316031	2.98E-12	9.08E-08	up
FB_Cluster_0	ENSMUSG00000020738	Sumo2	1.606233776	1.105293565	1078	775	0.276	0.253	-0.539211579	2.99E-12	9.13E-08	down
FB_Cluster_0	ENSMUSG00000052188	Gm14964	0.620610857	0.979268814	1078	775	0.108	0.208	0.657930875	3.11E-12	9.47E-08	up
FB_Cluster_0	ENSMUSG00000046949	Nqo2	0.240553041	0.380010901	1078	775	0.045	0.106	0.659465745	3.14E-12	9.57E-08	up
FB_Cluster_0	ENSMUSG00000024962	Vegfb	1.09309983	0.556597146	1078	775	0.192	0.134	-0.973592548	3.15E-12	9.60E-08	down
FB_Cluster_0	ENSMUSG00000026087	Mrpl30	1.13694242	0.521775947	1078	775	0.194	0.123	-1.123507262	3.20E-12	9.76E-08	down
FB_Cluster_0	ENSMUSG00000021903	Galnt15	0.588142312	0.944520593	1078	775	0.112	0.215	0.683324426	3.22E-12	9.83E-08	up
FB_Cluster_0	ENSMUSG00000056073	Grik2	0.912978013	1.644247775	1078	775	0.138	0.27	0.848705423	3.25E-12	9.91E-08	up
FB_Cluster_0	ENSMUSG00000051510	Mafg	0.388385192	0.537933142	1078	775	0.071	0.141	0.469835435	3.27E-12	9.96E-08	up
FB_Cluster_0	ENSMUSG00000040813	Tex264	0.684253166	0.379828309	1078	775	0.136	0.11	-0.849013818	3.30E-12	1.00E-07	down
FB_Cluster_0	ENSMUSG00000015759	Cnih1	0.722212773	0.526371637	1078	775	0.137	0.142	-0.456267873	3.39E-12	1.03E-07	down
FB_Cluster_0	ENSMUSG00000046318	Ccbe1	2.627158877	3.825724446	1078	775	0.306	0.465	0.542212311	3.44E-12	1.05E-07	up
FB_Cluster_0	ENSMUSG00000037808	Fam76b	0.558279745	0.731804807	1078	775	0.108	0.185	0.390409411	3.50E-12	1.07E-07	up
FB_Cluster_0	ENSMUSG00000022607	Ptk2	1.513655046	1.953511324	1078	775	0.263	0.391	0.368011699	3.78E-12	1.15E-07	up
FB_Cluster_0	ENSMUSG00000024384	Iws1	0.561690109	0.825591384	1078	775	0.11	0.204	0.555571428	3.81E-12	1.16E-07	up
FB_Cluster_0	ENSMUSG00000069874	Irgm2	0.185030121	0.446217782	1078	775	0.034	0.11	1.26953164	3.81E-12	1.16E-07	up
FB_Cluster_0	ENSMUSG00000034724	Cnot6l	0.712900158	0.991364228	1078	775	0.131	0.226	0.475658325	3.89E-12	1.19E-07	up
FB_Cluster_0	ENSMUSG00000029826	Zc3hav1	0.792629335	1.190165943	1078	775	0.146	0.259	0.586383683	3.93E-12	1.20E-07	up
FB_Cluster_0	ENSMUSG00000113902	Ndufb1-ps	2.514393252	1.762175209	1078	775	0.379	0.35	-0.512828439	3.98E-12	1.21E-07	down
FB_Cluster_0	ENSMUSG00000029447	Cct6a	0.800131506	0.425997874	1078	775	0.15	0.119	-0.909232575	4.07E-12	1.24E-07	down
FB_Cluster_0	ENSMUSG00000025723	Nmb	2.309308786	1.210996343	1078	775	0.302	0.219	-0.931209929	4.17E-12	1.27E-07	down
FB_Cluster_0	ENSMUSG00000027620	Rbm39	5.784762228	7.537133607	1078	775	0.7	0.836	0.381752507	4.22E-12	1.29E-07	up
FB_Cluster_0	ENSMUSG00000070469	Adamtsl3	1.249566779	2.184009922	1078	775	0.193	0.341	0.805502011	4.22E-12	1.29E-07	up
FB_Cluster_0	ENSMUSG00000108621	Gm37494	0.591060805	0.806543225	1078	775	0.112	0.199	0.448380097	4.23E-12	1.29E-07	up
FB_Cluster_0	ENSMUSG00000035967	Ints6l	0.635601062	0.832500361	1078	775	0.122	0.205	0.389275685	4.25E-12	1.30E-07	up
FB_Cluster_0	ENSMUSG00000058440	Nrf1	0.665896954	0.871110357	1078	775	0.131	0.218	0.387505526	4.33E-12	1.32E-07	up
FB_Cluster_0	ENSMUSG00000032609	Klhdc8b	0.239363409	0.481473416	1078	775	0.045	0.121	1.007950529	4.43E-12	1.35E-07	up
FB_Cluster_0	ENSMUSG00000026864	Hspa5	11.32490404	8.633346604	1078	775	0.808	0.742	-0.391503039	4.65E-12	1.42E-07	down
FB_Cluster_0	ENSMUSG00000030213	Atf7ip	1.593927096	2.205644692	1078	775	0.276	0.417	0.46858966	4.71E-12	1.44E-07	up
FB_Cluster_0	ENSMUSG00000062825	Actg1	1.786446433	1.256412985	1078	775	0.302	0.272	-0.50774783	5.15E-12	1.57E-07	down
FB_Cluster_0	ENSMUSG00000028483	Snapc3	0.760677977	1.043376582	1078	775	0.145	0.244	0.455850835	5.29E-12	1.61E-07	up
FB_Cluster_0	ENSMUSG00000049690	Nckap5	1.000428616	1.448868025	1078	775	0.16	0.277	0.534263328	5.43E-12	1.65E-07	up
FB_Cluster_0	ENSMUSG00000033799	Tasor2	0.872762829	1.17130795	1078	775	0.167	0.271	0.424416735	5.45E-12	1.66E-07	up
FB_Cluster_0	ENSMUSG00000025220	Oga	0.972643099	1.335362484	1078	775	0.184	0.297	0.457208702	5.71E-12	1.74E-07	up
FB_Cluster_0	ENSMUSG00000024038	Ndufv3	2.055258035	1.213106814	1078	775	0.323	0.254	-0.760564222	6.03E-12	1.84E-07	down
FB_Cluster_0	ENSMUSG00000041685	Fcho2	2.427618825	3.179075453	1078	775	0.386	0.537	0.389051298	6.30E-12	1.92E-07	up
FB_Cluster_0	ENSMUSG00000062563	Cys1	0.370784221	0.641905798	1078	775	0.074	0.16	0.791617437	6.36E-12	1.94E-07	up
FB_Cluster_0	ENSMUSG00000038872	Zfhx3	1.175944432	1.577779709	1078	775	0.215	0.335	0.424044657	6.46E-12	1.97E-07	up
FB_Cluster_0	ENSMUSG00000074582	Arfgef2	0.440230621	0.610064329	1078	775	0.086	0.155	0.470610666	6.70E-12	2.04E-07	up
FB_Cluster_0	ENSMUSG00000028420	Tmem38b	0.284097871	0.429996267	1078	775	0.054	0.116	0.597763863	6.73E-12	2.05E-07	up
FB_Cluster_0	ENSMUSG00000051022	Hs3st1	0.395687055	0.639719845	1078	775	0.072	0.152	0.692941314	6.85E-12	2.09E-07	up
FB_Cluster_0	ENSMUSG00000031701	Dnaja2	1.805052525	1.384863581	1078	775	0.313	0.311	-0.382272702	6.85E-12	2.09E-07	down
FB_Cluster_0	ENSMUSG00000009079	Ewsr1	1.184976658	1.630409383	1078	775	0.235	0.36	0.460342359	6.87E-12	2.09E-07	up
FB_Cluster_0	ENSMUSG00000003955	Fam162a	0.968611488	0.655460537	1078	775	0.169	0.163	-0.56333804	6.97E-12	2.12E-07	down
FB_Cluster_0	ENSMUSG00000038497	Tmco3	0.312117657	0.444236187	1078	775	0.058	0.117	0.509099511	7.37E-12	2.25E-07	up
FB_Cluster_0	ENSMUSG00000004151	Etv1	0.871029521	1.181845713	1078	775	0.147	0.246	0.440204631	7.95E-12	2.42E-07	up
FB_Cluster_0	ENSMUSG00000021938	Pspc1	0.663126117	0.911749806	1078	775	0.131	0.221	0.459295393	8.04E-12	2.45E-07	up
FB_Cluster_0	ENSMUSG00000031672	Got2	1.194890222	0.833099941	1078	775	0.219	0.201	-0.520264171	8.08E-12	2.46E-07	down
FB_Cluster_0	ENSMUSG00000046785	Epm2aip1	0.382179998	0.520813645	1078	775	0.075	0.143	0.446414512	8.27E-12	2.52E-07	up
FB_Cluster_0	ENSMUSG00000024646	Cyb5a	2.589883777	1.952280178	1078	775	0.391	0.388	-0.407709051	8.37E-12	2.55E-07	down
FB_Cluster_0	ENSMUSG00000013495	Tmem175	0.614949005	0.795748601	1078	775	0.112	0.188	0.371792641	8.40E-12	2.56E-07	up
FB_Cluster_0	ENSMUSG00000021495	Fam193b	0.415348704	0.59007886	1078	775	0.075	0.146	0.506481887	8.48E-12	2.58E-07	up
FB_Cluster_0	ENSMUSG00000020372	Rack1	2.326507411	1.692497219	1078	775	0.377	0.348	-0.458989091	8.73E-12	2.66E-07	down
FB_Cluster_0	ENSMUSG00000020680	Taf15	1.188298277	1.532897231	1078	775	0.22	0.334	0.367336672	8.76E-12	2.67E-07	up
FB_Cluster_0	ENSMUSG00000015002	Efr3a	0.797406106	1.030611927	1078	775	0.148	0.237	0.370073701	8.76E-12	2.67E-07	up
FB_Cluster_0	ENSMUSG00000035948	Acss3	1.40243283	1.911002059	1078	775	0.21	0.33	0.446370284	8.96E-12	2.73E-07	up
FB_Cluster_0	ENSMUSG00000033632	AW554918	1.168115975	1.614067794	1078	775	0.206	0.329	0.466483537	9.31E-12	2.84E-07	up
FB_Cluster_0	ENSMUSG00000075701	Selenos	2.234467268	1.414037198	1078	775	0.347	0.279	-0.66007338	9.33E-12	2.84E-07	down
FB_Cluster_0	ENSMUSG00000039671	Zmynd8	0.733228116	0.971152043	1078	775	0.139	0.227	0.405386875	9.73E-12	2.96E-07	up
FB_Cluster_0	ENSMUSG00000023046	Igfbp6	3.159269743	2.0112123	1078	775	0.424	0.348	-0.651499678	9.75E-12	2.97E-07	down
FB_Cluster_0	ENSMUSG00000010358	Ifi35	0.239515767	0.533376812	1078	775	0.05	0.135	1.154702723	9.80E-12	2.99E-07	up
FB_Cluster_0	ENSMUSG00000052331	Ankrd44	1.008060501	1.52817114	1078	775	0.18	0.306	0.600175186	1.01E-11	3.07E-07	up
FB_Cluster_0	ENSMUSG00000039982	Dtx4	0.568225941	0.733440451	1078	775	0.11	0.185	0.368157956	1.03E-11	3.14E-07	up
FB_Cluster_0	ENSMUSG00000018567	Gabarap	1.435237374	0.866829373	1078	775	0.254	0.205	-0.727403509	1.06E-11	3.23E-07	down
FB_Cluster_0	ENSMUSG00000006932	Ctnnb1	1.057916189	0.814047772	1078	775	0.194	0.201	-0.377999123	1.13E-11	3.45E-07	down
FB_Cluster_0	ENSMUSG00000040022	Rab11fip2	0.950859212	1.228832726	1078	775	0.176	0.276	0.369950574	1.19E-11	3.62E-07	up
FB_Cluster_0	ENSMUSG00000040651	Tasor	1.673822241	2.178285118	1078	775	0.29	0.426	0.38002652	1.22E-11	3.72E-07	up
FB_Cluster_0	ENSMUSG00000022940	Pigp	0.884911993	0.629909554	1078	775	0.162	0.157	-0.4903233	1.24E-11	3.78E-07	down
FB_Cluster_0	ENSMUSG00000032621	Srek1	1.664654043	2.228914083	1078	775	0.29	0.428	0.421096688	1.26E-11	3.85E-07	up
FB_Cluster_0	ENSMUSG00000023927	Satb1	0.25374663	0.490228776	1078	775	0.051	0.125	0.949792324	1.27E-11	3.88E-07	up
FB_Cluster_0	ENSMUSG00000027309	4930402H24Rik	1.290066897	1.665406262	1078	775	0.219	0.333	0.368403072	1.38E-11	4.21E-07	up
FB_Cluster_0	ENSMUSG00000085208	Brip1os	1.243552667	1.651191356	1078	775	0.217	0.334	0.409011074	1.40E-11	4.26E-07	up
FB_Cluster_0	ENSMUSG00000039449	Prpf18	0.32626834	0.539968804	1078	775	0.063	0.138	0.726642102	1.45E-11	4.41E-07	up
FB_Cluster_0	ENSMUSG00000035954	Dock4	1.303214657	1.694925504	1078	775	0.195	0.307	0.379121547	1.48E-11	4.50E-07	up
FB_Cluster_0	ENSMUSG00000021427	Ssr1	1.438378949	1.104336981	1078	775	0.26	0.262	-0.381233008	1.49E-11	4.55E-07	down
FB_Cluster_0	ENSMUSG00000032047	Acat1	1.814197067	1.272596432	1078	775	0.303	0.279	-0.511522353	1.50E-11	4.56E-07	down
FB_Cluster_0	ENSMUSG00000030161	Gabarapl1	0.405451136	0.536633335	1078	775	0.08	0.145	0.404321655	1.52E-11	4.62E-07	up
FB_Cluster_0	ENSMUSG00000024132	Eci1	1.280614372	0.680987786	1078	775	0.216	0.157	-0.911036093	1.52E-11	4.63E-07	down
FB_Cluster_0	ENSMUSG00000002428	Hltf	0.581019258	0.85074278	1078	775	0.114	0.204	0.550058306	1.54E-11	4.71E-07	up
FB_Cluster_0	ENSMUSG00000061136	Prpf40a	1.032611926	1.346374875	1078	775	0.195	0.298	0.382749437	1.61E-11	4.92E-07	up
FB_Cluster_0	ENSMUSG00000032766	Gng11	0.84961759	0.613087918	1078	775	0.149	0.152	-0.470654159	1.65E-11	5.04E-07	down
FB_Cluster_0	ENSMUSG00000025223	Ldb1	0.294756009	0.480947699	1078	775	0.059	0.128	0.706169357	1.67E-11	5.10E-07	up
FB_Cluster_0	ENSMUSG00000052738	Suclg1	1.638994611	0.975131498	1078	775	0.279	0.215	-0.749082504	1.68E-11	5.12E-07	down
FB_Cluster_0	ENSMUSG00000037990	Sh3rf3	0.943489389	1.304031386	1078	775	0.16	0.265	0.466858123	1.79E-11	5.45E-07	up
FB_Cluster_0	ENSMUSG00000050608	Micos10	1.837380072	1.156654061	1078	775	0.289	0.25	-0.66764644	1.79E-11	5.45E-07	down
FB_Cluster_0	ENSMUSG00000042851	Zc3h6	0.464401101	0.808341096	1078	775	0.093	0.191	0.799460645	1.81E-11	5.51E-07	up
FB_Cluster_0	ENSMUSG00000026260	Ndufa10	1.337124779	0.886361915	1078	775	0.239	0.205	-0.593111439	1.82E-11	5.55E-07	down
FB_Cluster_0	ENSMUSG00000004798	Ulk2	1.346874286	1.822452813	1078	775	0.236	0.361	0.436238311	1.86E-11	5.66E-07	up
FB_Cluster_0	ENSMUSG00000068457	Uty	1.130253723	1.584292606	1078	775	0.203	0.325	0.487155566	1.90E-11	5.80E-07	up
FB_Cluster_0	ENSMUSG00000040123	Zmym5	0.702567506	1.034667303	1078	775	0.132	0.232	0.558392282	1.92E-11	5.86E-07	up
FB_Cluster_0	ENSMUSG00000025283	Sat1	1.085056543	1.495536942	1078	775	0.199	0.316	0.462856832	1.97E-11	6.00E-07	up
FB_Cluster_0	ENSMUSG00000046229	Scand1	0.935794538	0.531404306	1078	775	0.171	0.141	-0.816264587	2.00E-11	6.11E-07	down
FB_Cluster_0	ENSMUSG00000060510	Zfp266	0.710406004	0.984241496	1078	775	0.136	0.23	0.470312074	2.07E-11	6.32E-07	up
FB_Cluster_0	ENSMUSG00000062070	Pgk1	0.626026451	0.353394358	1078	775	0.112	0.097	-0.82476686	2.13E-11	6.48E-07	down
FB_Cluster_0	ENSMUSG00000030016	Zfp638	2.137404832	2.914391587	1078	775	0.354	0.508	0.447316556	2.13E-11	6.48E-07	up
FB_Cluster_0	ENSMUSG00000096054	Syne1	1.614914134	2.072869077	1078	775	0.275	0.404	0.360151805	2.17E-11	6.60E-07	up
FB_Cluster_0	ENSMUSG00000053774	Ubxn7	0.547444721	0.763667244	1078	775	0.097	0.181	0.480156245	2.19E-11	6.68E-07	up
FB_Cluster_0	ENSMUSG00000052707	Tnrc6a	1.12681399	1.446424827	1078	775	0.207	0.314	0.360213676	2.30E-11	7.02E-07	up
FB_Cluster_0	ENSMUSG00000027007	Itprid2	1.024088217	1.550851219	1078	775	0.199	0.328	0.598672445	2.32E-11	7.06E-07	up
FB_Cluster_0	ENSMUSG00000031393	Mecp2	1.035398397	1.334022243	1078	775	0.191	0.294	0.365565544	2.36E-11	7.18E-07	up
FB_Cluster_0	ENSMUSG00000037605	Adgrl3	1.782455761	2.335728361	1078	775	0.241	0.37	0.389987061	2.42E-11	7.39E-07	up
FB_Cluster_0	ENSMUSG00000055320	Tead1	1.377014627	1.858048084	1078	775	0.236	0.36	0.43221683	2.45E-11	7.47E-07	up
FB_Cluster_0	ENSMUSG00000026193	Fn1	0.258906817	0.608122613	1078	775	0.048	0.135	1.231609386	2.50E-11	7.61E-07	up
FB_Cluster_0	ENSMUSG00000025825	Iscu	0.873610156	0.426603679	1078	775	0.162	0.11	-1.033920212	2.55E-11	7.77E-07	down
FB_Cluster_0	ENSMUSG00000055421	Pcdh9	19.28107404	25.93817882	1078	775	0.843	0.917	0.42788985	2.63E-11	8.01E-07	up
FB_Cluster_0	ENSMUSG00000055128	Cgrrf1	0.48988549	0.37938351	1078	775	0.096	0.106	-0.368701833	2.66E-11	8.09E-07	down
FB_Cluster_0	ENSMUSG00000025724	Sec11a	2.282646197	1.756343866	1078	775	0.378	0.366	-0.378112995	2.66E-11	8.12E-07	down
FB_Cluster_0	ENSMUSG00000058355	Abce1	0.671729717	0.505727449	1078	775	0.122	0.138	-0.409450283	2.70E-11	8.23E-07	down
FB_Cluster_0	ENSMUSG00000015971	Actr8	0.364865298	0.548353955	1078	775	0.074	0.146	0.587611212	2.71E-11	8.26E-07	up
FB_Cluster_0	ENSMUSG00000042272	Sestd1	0.904414683	1.164537556	1078	775	0.165	0.265	0.364665219	2.72E-11	8.28E-07	up
FB_Cluster_0	ENSMUSG00000003810	Mast2	0.708133576	1.012579276	1078	775	0.134	0.231	0.515880187	2.83E-11	8.62E-07	up
FB_Cluster_0	ENSMUSG00000043259	Fam13c	0.60583877	0.997246012	1078	775	0.122	0.227	0.718922093	2.91E-11	8.88E-07	up
FB_Cluster_0	ENSMUSG00000035401	Emsy	0.770388699	1.021698274	1078	775	0.147	0.24	0.407264703	2.92E-11	8.90E-07	up
FB_Cluster_0	ENSMUSG00000022801	Lrch3	1.75063777	2.415897573	1078	775	0.301	0.446	0.464655996	3.00E-11	9.13E-07	up
FB_Cluster_0	ENSMUSG00000000399	Ndufa9	1.154933888	0.561922142	1078	775	0.204	0.132	-1.039236306	3.02E-11	9.21E-07	down
FB_Cluster_0	ENSMUSG00000029125	Stx18	0.432035543	0.560414665	1078	775	0.081	0.145	0.375268223	3.04E-11	9.28E-07	up
FB_Cluster_0	ENSMUSG00000048897	Zfp710	0.386580314	0.565393088	1078	775	0.073	0.145	0.54836807	3.25E-11	9.90E-07	up
FB_Cluster_0	ENSMUSG00000028911	Srsf4	0.657660108	0.481895288	1078	775	0.127	0.135	-0.448542471	3.28E-11	1.00E-06	down
FB_Cluster_0	ENSMUSG00000095098	Ccdc85b	0.632353664	0.420347008	1078	775	0.118	0.114	-0.589035809	3.50E-11	1.07E-06	down
FB_Cluster_0	ENSMUSG00000038764	Ptpn3	0.582717083	0.802097941	1078	775	0.108	0.188	0.460915098	3.58E-11	1.09E-06	up
FB_Cluster_0	ENSMUSG00000019944	Rhobtb1	0.750131562	0.96509611	1078	775	0.137	0.225	0.363486143	3.65E-11	1.11E-06	up
FB_Cluster_0	ENSMUSG00000006360	Crip1	2.3585255	1.802409072	1078	775	0.367	0.36	-0.387939846	3.65E-11	1.11E-06	down
FB_Cluster_0	ENSMUSG00000019804	Snx3	0.893380366	0.538255924	1078	775	0.165	0.138	-0.730875729	3.74E-11	1.14E-06	down
FB_Cluster_0	ENSMUSG00000032637	Atxn2l	0.491275779	0.721244241	1078	775	0.102	0.186	0.553861162	3.90E-11	1.19E-06	up
FB_Cluster_0	ENSMUSG00000037379	Spon2	1.710772025	0.826233547	1078	775	0.251	0.154	-1.049935705	3.96E-11	1.21E-06	down
FB_Cluster_0	ENSMUSG00000029502	Golga3	1.120227889	0.831941272	1078	775	0.203	0.205	-0.429194032	4.01E-11	1.22E-06	down
FB_Cluster_0	ENSMUSG00000022452	Smdt1	1.499538494	1.042691115	1078	775	0.244	0.226	-0.524164568	4.04E-11	1.23E-06	down
FB_Cluster_0	ENSMUSG00000027180	Fbxo3	0.470115762	0.670954971	1078	775	0.094	0.169	0.513108052	4.10E-11	1.25E-06	up
FB_Cluster_0	ENSMUSG00000097039	Pvt1	0.913574644	1.265642079	1078	775	0.161	0.268	0.470231031	4.20E-11	1.28E-06	up
FB_Cluster_0	ENSMUSG00000021660	Btf3	1.196373335	0.707586939	1078	775	0.216	0.178	-0.757605047	4.38E-11	1.33E-06	down
FB_Cluster_0	ENSMUSG00000030751	Psma1	0.784448336	0.569912243	1078	775	0.147	0.148	-0.460869428	4.56E-11	1.39E-06	down
FB_Cluster_0	ENSMUSG00000023952	Gtpbp2	0.482060575	0.674212272	1078	775	0.096	0.172	0.483903165	4.62E-11	1.41E-06	up
FB_Cluster_0	ENSMUSG00000037536	Fbxo34	0.222408608	0.412342053	1078	775	0.046	0.112	0.890330289	4.70E-11	1.43E-06	up
FB_Cluster_0	ENSMUSG00000033392	Clasp2	1.846485882	2.545623388	1078	775	0.318	0.461	0.463215306	4.88E-11	1.49E-06	up
FB_Cluster_0	ENSMUSG00000116903	Gm19522	0.834423436	1.286773071	1078	775	0.149	0.262	0.624845292	4.91E-11	1.50E-06	up
FB_Cluster_0	ENSMUSG00000034152	Exoc3	1.081329562	0.809049057	1078	775	0.186	0.192	-0.418462302	4.95E-11	1.51E-06	down
FB_Cluster_0	ENSMUSG00000030335	Mrpl51	1.084829681	0.577875422	1078	775	0.191	0.139	-0.908521491	5.25E-11	1.60E-06	down
FB_Cluster_0	ENSMUSG00000025816	Sec61a2	0.421690411	0.705909625	1078	775	0.079	0.164	0.743161556	5.71E-11	1.74E-06	up
FB_Cluster_0	ENSMUSG00000078622	Ccdc47	1.337354251	1.033134061	1078	775	0.238	0.246	-0.372322436	5.85E-11	1.78E-06	down
FB_Cluster_0	ENSMUSG00000030847	Bag3	1.010975258	0.630702355	1078	775	0.18	0.156	-0.680630434	5.91E-11	1.80E-06	down
FB_Cluster_0	ENSMUSG00000038371	Sbf2	2.677475748	3.625279571	1078	775	0.416	0.572	0.437204662	6.22E-11	1.89E-06	up
FB_Cluster_0	ENSMUSG00000006527	Sfmbt1	0.406886721	0.633524594	1078	775	0.074	0.151	0.638646612	6.32E-11	1.93E-06	up
FB_Cluster_0	ENSMUSG00000032422	Snx14	0.526130223	0.405625786	1078	775	0.109	0.119	-0.375189114	6.40E-11	1.95E-06	down
FB_Cluster_0	ENSMUSG00000085438	Oip5os1	1.231143585	0.95172828	1078	775	0.22	0.226	-0.371342983	6.46E-11	1.97E-06	down
FB_Cluster_0	ENSMUSG00000046516	Cox17	1.158151099	0.857032901	1078	775	0.204	0.203	-0.43435723	6.47E-11	1.97E-06	down
FB_Cluster_0	ENSMUSG00000020024	Cep83	0.847119989	1.355509567	1078	775	0.16	0.281	0.678133191	6.50E-11	1.98E-06	up
FB_Cluster_0	ENSMUSG00000055980	Irs1	0.717215691	0.981321466	1078	775	0.13	0.225	0.452264638	6.50E-11	1.98E-06	up
FB_Cluster_0	ENSMUSG00000025967	Eef1b2	1.704069089	1.073754479	1078	775	0.284	0.232	-0.666269986	6.61E-11	2.02E-06	down
FB_Cluster_0	ENSMUSG00000004071	Cdip1	0.480658727	0.637068316	1078	775	0.093	0.16	0.406361482	6.87E-11	2.09E-06	up
FB_Cluster_0	ENSMUSG00000032481	Smarcc1	0.596327872	0.806579259	1078	775	0.121	0.199	0.435647484	7.00E-11	2.13E-06	up
FB_Cluster_0	ENSMUSG00000034893	Cog3	0.393622794	0.594319691	1078	775	0.08	0.155	0.594301671	7.14E-11	2.18E-06	up
FB_Cluster_0	ENSMUSG00000028691	Prdx1	1.848073881	1.409042133	1078	775	0.307	0.301	-0.39128336	7.41E-11	2.26E-06	down
FB_Cluster_0	ENSMUSG00000030884	Uqcrc2	1.67780961	1.148041254	1078	775	0.282	0.254	-0.547364854	7.52E-11	2.29E-06	down
FB_Cluster_0	ENSMUSG00000039853	Trim14	0.236423647	0.514648838	1078	775	0.05	0.13	1.121884244	7.77E-11	2.37E-06	up
FB_Cluster_0	ENSMUSG00000034858	Fam214a	0.445790381	0.71538672	1078	775	0.088	0.175	0.682235913	8.22E-11	2.51E-06	up
FB_Cluster_0	ENSMUSG00000023939	Mrpl14	0.7850751	0.390099685	1078	775	0.141	0.099	-1.008801808	8.59E-11	2.62E-06	down
FB_Cluster_0	ENSMUSG00000013076	Amotl1	0.655677439	0.926236933	1078	775	0.123	0.214	0.498330767	8.62E-11	2.63E-06	up
FB_Cluster_0	ENSMUSG00000039478	Micu3	0.736350557	0.968257693	1078	775	0.133	0.221	0.39495138	8.74E-11	2.67E-06	up
FB_Cluster_0	ENSMUSG00000058070	Eml1	0.591529995	0.81375236	1078	775	0.116	0.197	0.460071902	8.82E-11	2.69E-06	up
FB_Cluster_0	ENSMUSG00000008859	Rala	0.757937682	0.53508419	1078	775	0.137	0.142	-0.502234069	8.89E-11	2.71E-06	down
FB_Cluster_0	ENSMUSG00000038400	Pmepa1	3.197738053	2.275313644	1078	775	0.42	0.391	-0.490968044	8.95E-11	2.73E-06	down
FB_Cluster_0	ENSMUSG00000024359	Hspa9	1.479688294	1.050059659	1078	775	0.267	0.236	-0.49478211	9.02E-11	2.75E-06	down
FB_Cluster_0	ENSMUSG00000002844	Adprh	0.649639318	0.333983304	1078	775	0.128	0.098	-0.959653126	9.11E-11	2.78E-06	down
FB_Cluster_0	ENSMUSG00000035900	Gramd4	0.702927224	0.510819725	1078	775	0.13	0.133	-0.460483922	1.02E-10	3.10E-06	down
FB_Cluster_0	ENSMUSG00000035227	Spcs2	1.574180484	0.977714845	1078	775	0.28	0.221	-0.68705939	1.03E-10	3.13E-06	down
FB_Cluster_0	ENSMUSG00000022019	Tdrd3	0.907420548	1.17121782	1078	775	0.164	0.258	0.368130369	1.05E-10	3.21E-06	up
FB_Cluster_0	ENSMUSG00000005510	Ndufs3	1.307254959	0.77124954	1078	775	0.241	0.179	-0.761194223	1.09E-10	3.33E-06	down
FB_Cluster_0	ENSMUSG00000063200	Nol7	0.855807107	0.492958211	1078	775	0.152	0.126	-0.795696245	1.11E-10	3.38E-06	down
FB_Cluster_0	ENSMUSG00000020935	Dcakd	0.370186486	0.563892284	1078	775	0.076	0.148	0.60703353	1.16E-10	3.54E-06	up
FB_Cluster_0	ENSMUSG00000068290	Ddrgk1	1.434489187	0.890842291	1078	775	0.246	0.199	-0.68723377	1.18E-10	3.59E-06	down
FB_Cluster_0	ENSMUSG00000021559	Dapk1	2.888782247	4.095415535	1078	775	0.394	0.551	0.503533667	1.19E-10	3.64E-06	up
FB_Cluster_0	ENSMUSG00000026484	Rnf2	0.409783759	0.526542248	1078	775	0.081	0.137	0.361608435	1.20E-10	3.66E-06	up
FB_Cluster_0	ENSMUSG00000025508	Rplp2	3.391252603	2.626268972	1078	775	0.485	0.471	-0.36879118	1.21E-10	3.68E-06	down
FB_Cluster_0	ENSMUSG00000022037	Clu	0.728871475	0.224384264	1078	775	0.127	0.055	-1.699248042	1.25E-10	3.81E-06	down
FB_Cluster_0	ENSMUSG00000097328	Tnfsf12	0.669790619	0.45473249	1078	775	0.129	0.121	-0.558590236	1.26E-10	3.83E-06	down
FB_Cluster_0	ENSMUSG00000025898	Cwf19l2	1.109081525	1.443033336	1078	775	0.201	0.305	0.37970911	1.28E-10	3.90E-06	up
FB_Cluster_0	ENSMUSG00000026915	Strbp	1.508113661	2.137043873	1078	775	0.244	0.374	0.502843211	1.28E-10	3.91E-06	up
FB_Cluster_0	ENSMUSG00000038507	Parp12	0.31202642	0.578375871	1078	775	0.065	0.146	0.890126305	1.29E-10	3.94E-06	up
FB_Cluster_0	ENSMUSG00000027712	Anxa5	1.585077153	1.088497074	1078	775	0.27	0.248	-0.542174016	1.32E-10	4.02E-06	down
FB_Cluster_0	ENSMUSG00000052572	Dlg2	1.92661549	2.76595716	1078	775	0.281	0.423	0.521687419	1.33E-10	4.04E-06	up
FB_Cluster_0	ENSMUSG00000028266	Lmo4	0.597707415	0.807691316	1078	775	0.117	0.195	0.434301845	1.33E-10	4.06E-06	up
FB_Cluster_0	ENSMUSG00000041415	Dicer1	0.709341672	0.993561714	1078	775	0.14	0.234	0.486070703	1.36E-10	4.15E-06	up
FB_Cluster_0	ENSMUSG00000021124	Vti1b	0.882281872	0.63821122	1078	775	0.161	0.16	-0.467143145	1.39E-10	4.24E-06	down
FB_Cluster_0	ENSMUSG00000006221	Hspb7	1.387787154	0.886693897	1078	775	0.247	0.204	-0.646219524	1.40E-10	4.26E-06	down
FB_Cluster_0	ENSMUSG00000034480	Diaph2	4.507531479	6.062421935	1078	775	0.55	0.702	0.427548489	1.41E-10	4.29E-06	up
FB_Cluster_0	ENSMUSG00000065990	Aurkaip1	0.579429867	0.260994886	1078	775	0.102	0.071	-1.150308817	1.44E-10	4.39E-06	down
FB_Cluster_0	ENSMUSG00000022477	Aco2	2.494823657	1.916256341	1078	775	0.386	0.374	-0.38062982	1.45E-10	4.42E-06	down
FB_Cluster_0	ENSMUSG00000053436	Mapk14	0.630372887	0.838237066	1078	775	0.117	0.196	0.411096088	1.47E-10	4.47E-06	up
FB_Cluster_0	ENSMUSG00000024079	Eif2ak2	0.342284476	0.687843058	1078	775	0.067	0.157	1.006671863	1.48E-10	4.51E-06	up
FB_Cluster_0	ENSMUSG00000048960	Prex2	4.87886421	6.411681298	1078	775	0.58	0.73	0.394150316	1.49E-10	4.55E-06	up
FB_Cluster_0	ENSMUSG00000005625	Psmd4	0.959076115	0.69411239	1078	775	0.171	0.172	-0.46641862	1.53E-10	4.65E-06	down
FB_Cluster_0	ENSMUSG00000026615	Eprs	1.206441347	0.774902037	1078	775	0.217	0.187	-0.638605349	1.53E-10	4.68E-06	down
FB_Cluster_0	ENSMUSG00000028494	Plin2	0.526553159	0.816575002	1078	775	0.098	0.185	0.632908916	1.56E-10	4.74E-06	up
FB_Cluster_0	ENSMUSG00000023912	Slc25a27	0.647344559	0.967602796	1078	775	0.126	0.223	0.579807372	1.57E-10	4.78E-06	up
FB_Cluster_0	ENSMUSG00000001036	Epn2	0.962689229	1.260881747	1078	775	0.183	0.279	0.389255485	1.64E-10	5.01E-06	up
FB_Cluster_0	ENSMUSG00000029198	Grpel1	0.674202731	0.340543895	1078	775	0.126	0.092	-0.985132089	1.70E-10	5.19E-06	down
FB_Cluster_0	ENSMUSG00000040488	Ltbp4	9.423083199	7.222491893	1078	775	0.755	0.73	-0.383697838	1.72E-10	5.25E-06	down
FB_Cluster_0	ENSMUSG00000025817	Nudt5	0.600544261	0.782108138	1078	775	0.114	0.187	0.381041756	1.73E-10	5.28E-06	up
FB_Cluster_0	ENSMUSG00000053702	Nebl	0.660584929	0.251870357	1078	775	0.117	0.07	-1.390708416	1.76E-10	5.37E-06	down
FB_Cluster_0	ENSMUSG00000093904	Tomm20	1.350800917	0.737751423	1078	775	0.24	0.165	-0.87251962	1.77E-10	5.38E-06	down
FB_Cluster_0	ENSMUSG00000022371	Col14a1	0.820993423	1.113873051	1078	775	0.136	0.228	0.440096046	1.78E-10	5.42E-06	up
FB_Cluster_0	ENSMUSG00000021710	Nln	0.199734369	0.479774287	1078	775	0.041	0.117	1.263851783	1.78E-10	5.42E-06	up
FB_Cluster_0	ENSMUSG00000002778	Kdelr1	1.27395571	0.990536004	1078	775	0.236	0.243	-0.363001402	1.84E-10	5.60E-06	down
FB_Cluster_0	ENSMUSG00000025041	Nt5c2	0.877217064	1.324441256	1078	775	0.163	0.28	0.594322546	1.87E-10	5.69E-06	up
FB_Cluster_0	ENSMUSG00000000275	Trim25	0.218052291	0.525394434	1078	775	0.048	0.13	1.268339859	1.88E-10	5.72E-06	up
FB_Cluster_0	ENSMUSG00000022136	Dnajc3	3.190035658	2.366188593	1078	775	0.476	0.437	-0.430991739	1.89E-10	5.77E-06	down
FB_Cluster_0	ENSMUSG00000036501	Fam13b	1.157117312	1.538834164	1078	775	0.214	0.323	0.411271703	1.93E-10	5.89E-06	up
FB_Cluster_0	ENSMUSG00000025025	Mxi1	0.758988157	1.028003368	1078	775	0.141	0.231	0.437645975	1.97E-10	6.01E-06	up
FB_Cluster_0	ENSMUSG00000113005	Gm34408	0.61383795	1.073002532	1078	775	0.109	0.214	0.805623173	2.09E-10	6.37E-06	up
FB_Cluster_0	ENSMUSG00000030157	Clec2d	3.574810902	4.607925434	1078	775	0.455	0.605	0.366241394	2.10E-10	6.40E-06	up
FB_Cluster_0	ENSMUSG00000040270	Bach2	0.594421482	0.861058967	1078	775	0.106	0.191	0.534550639	2.11E-10	6.43E-06	up
FB_Cluster_0	ENSMUSG00000018293	Pfn1	1.176364402	0.762331441	1078	775	0.215	0.182	-0.625778148	2.12E-10	6.46E-06	down
FB_Cluster_0	ENSMUSG00000029629	Phf14	1.282194503	1.664516609	1078	775	0.225	0.335	0.376462295	2.15E-10	6.56E-06	up
FB_Cluster_0	ENSMUSG00000008734	Gprc5b	0.405032552	0.576218173	1078	775	0.074	0.142	0.508471504	2.15E-10	6.57E-06	up
FB_Cluster_0	ENSMUSG00000030647	Ndufc2	2.611425707	1.764160587	1078	775	0.405	0.334	-0.565829238	2.18E-10	6.64E-06	down
FB_Cluster_0	ENSMUSG00000028211	Trp53inp1	0.159266163	0.463614547	1078	775	0.033	0.108	1.540891637	2.19E-10	6.66E-06	up
FB_Cluster_0	ENSMUSG00000041741	Pde3a	2.875273788	3.884947041	1078	775	0.387	0.537	0.434182554	2.19E-10	6.66E-06	up
FB_Cluster_0	ENSMUSG00000079523	Tmsb10	1.40088407	2.038257443	1078	775	0.249	0.382	0.54096651	2.20E-10	6.70E-06	up
FB_Cluster_0	ENSMUSG00000029279	Brdt	0.239791348	0.43029252	1078	775	0.046	0.111	0.84327188	2.22E-10	6.75E-06	up
FB_Cluster_0	ENSMUSG00000022336	Eif3e	0.607728471	0.471771817	1078	775	0.112	0.124	-0.365269244	2.22E-10	6.77E-06	down
FB_Cluster_0	ENSMUSG00000034088	Hdlbp	2.375432097	1.787656049	1078	775	0.385	0.359	-0.410100815	2.24E-10	6.83E-06	down
FB_Cluster_0	ENSMUSG00000049807	Arhgap23	0.371309659	0.511183111	1078	775	0.072	0.134	0.461111036	2.25E-10	6.87E-06	up
FB_Cluster_0	ENSMUSG00000030652	Coq7	0.69973378	0.285376772	1078	775	0.13	0.075	-1.293638937	2.45E-10	7.45E-06	down
FB_Cluster_0	ENSMUSG00000059602	Syn3	1.326936604	0.794924354	1078	775	0.231	0.183	-0.739137206	2.54E-10	7.73E-06	down
FB_Cluster_0	ENSMUSG00000041629	Fam104a	0.61138819	0.421031661	1078	775	0.11	0.11	-0.538053292	2.56E-10	7.81E-06	down
FB_Cluster_0	ENSMUSG00000025147	Mob2	0.259763664	0.470263792	1078	775	0.054	0.124	0.856022087	2.62E-10	7.97E-06	up
FB_Cluster_0	ENSMUSG00000041028	Ghitm	1.345994764	0.934981095	1078	775	0.237	0.214	-0.525616584	2.62E-10	7.99E-06	down
FB_Cluster_0	ENSMUSG00000025465	Echs1	0.793507869	0.41967133	1078	775	0.147	0.112	-0.918822696	2.63E-10	8.01E-06	down
FB_Cluster_0	ENSMUSG00000066258	Trim12a	0.573695214	0.858586772	1078	775	0.109	0.195	0.581596033	2.68E-10	8.17E-06	up
FB_Cluster_0	ENSMUSG00000037415	Ranbp10	0.340660804	0.463181036	1078	775	0.067	0.121	0.44312823	2.75E-10	8.37E-06	up
FB_Cluster_0	ENSMUSG00000055670	Zzef1	0.895074703	1.260932711	1078	775	0.173	0.276	0.494364527	2.76E-10	8.42E-06	up
FB_Cluster_0	ENSMUSG00000034484	Snx2	0.685732198	0.93380105	1078	775	0.134	0.219	0.445414063	2.78E-10	8.47E-06	up
FB_Cluster_0	ENSMUSG00000043556	Fbxl7	3.590667142	4.643565445	1078	775	0.419	0.57	0.370971938	2.83E-10	8.62E-06	up
FB_Cluster_0	ENSMUSG00000020620	Abca8b	5.059200161	7.440329017	1078	775	0.554	0.695	0.556447975	2.88E-10	8.78E-06	up
FB_Cluster_0	ENSMUSG00000025437	Usp33	0.922667687	1.391238173	1078	775	0.182	0.299	0.592433727	2.95E-10	8.99E-06	up
FB_Cluster_0	ENSMUSG00000031068	Glrx3	0.912206935	0.606644658	1078	775	0.17	0.156	-0.588429783	2.96E-10	9.01E-06	down
FB_Cluster_0	ENSMUSG00000024044	Epb41l3	0.550901447	0.793701256	1078	775	0.105	0.185	0.526721738	3.01E-10	9.16E-06	up
FB_Cluster_0	ENSMUSG00000001175	Calm1	2.038570024	1.26427366	1078	775	0.34	0.262	-0.689205396	3.06E-10	9.31E-06	down
FB_Cluster_0	ENSMUSG00000014748	Tex261	0.85520398	0.579359674	1078	775	0.149	0.145	-0.561728989	3.13E-10	9.55E-06	down
FB_Cluster_0	ENSMUSG00000038886	Man2a2	0.734729221	0.943721941	1078	775	0.143	0.228	0.361105713	3.16E-10	9.63E-06	up
FB_Cluster_0	ENSMUSG00000024725	Ostf1	0.465641171	0.600888861	1078	775	0.095	0.159	0.367809831	3.18E-10	9.68E-06	up
FB_Cluster_0	ENSMUSG00000101872	Gm29237	0.559287102	0.735390721	1078	775	0.109	0.182	0.394860152	3.18E-10	9.68E-06	up
FB_Cluster_0	ENSMUSG00000039233	Tbce	0.628223864	0.842907233	1078	775	0.119	0.197	0.424036635	3.21E-10	9.78E-06	up
FB_Cluster_0	ENSMUSG00000036835	Psenen	0.872884925	0.606764741	1078	775	0.161	0.15	-0.524581738	3.45E-10	1.05E-05	down
FB_Cluster_0	ENSMUSG00000048410	Zfp407	1.305116906	1.772579209	1078	775	0.216	0.337	0.441641905	3.49E-10	1.06E-05	up
FB_Cluster_0	ENSMUSG00000020227	Irak3	0.743425686	1.045548091	1078	775	0.139	0.235	0.491942912	3.53E-10	1.08E-05	up
FB_Cluster_0	ENSMUSG00000034544	Rsrc1	1.966773994	2.68389055	1078	775	0.312	0.453	0.448475057	3.55E-10	1.08E-05	up
FB_Cluster_0	ENSMUSG00000020477	Mrps24	0.957921732	0.516235803	1078	775	0.169	0.126	-0.891748746	3.61E-10	1.10E-05	down
FB_Cluster_0	ENSMUSG00000107872	Gm44511	0.382883615	0.561082331	1078	775	0.077	0.142	0.551186913	3.66E-10	1.12E-05	up
FB_Cluster_0	ENSMUSG00000038774	Ascc3	2.252257644	2.998537753	1078	775	0.355	0.497	0.412871324	3.74E-10	1.14E-05	up
FB_Cluster_0	ENSMUSG00000022514	Il1rap	0.800215823	1.073334502	1078	775	0.144	0.232	0.423592827	3.75E-10	1.14E-05	up
FB_Cluster_0	ENSMUSG00000036202	Rif1	0.869340441	1.185814268	1078	775	0.161	0.257	0.447840611	3.86E-10	1.18E-05	up
FB_Cluster_0	ENSMUSG00000030180	Kdm5a	0.991167354	1.367650843	1078	775	0.184	0.288	0.464459322	3.89E-10	1.19E-05	up
FB_Cluster_0	ENSMUSG00000021835	Bmp4	0.754682883	1.133480267	1078	775	0.135	0.232	0.586752938	3.99E-10	1.21E-05	up
FB_Cluster_0	ENSMUSG00000026500	Cox20	0.6906014	0.461617114	1078	775	0.126	0.12	-0.58105294	3.99E-10	1.22E-05	down
FB_Cluster_0	ENSMUSG00000004897	Hdgf	0.590930498	0.424089558	1078	775	0.117	0.117	-0.478523471	4.12E-10	1.26E-05	down
FB_Cluster_0	ENSMUSG00000052374	Actn2	1.723197251	1.070688982	1078	775	0.296	0.236	-0.686497373	4.19E-10	1.28E-05	down
FB_Cluster_0	ENSMUSG00000040265	Dnm3	1.550239939	2.207386713	1078	775	0.257	0.392	0.509820168	4.27E-10	1.30E-05	up
FB_Cluster_0	ENSMUSG00000008658	Rbfox1	0.930148204	1.543449585	1078	775	0.131	0.245	0.730564223	4.32E-10	1.32E-05	up
FB_Cluster_0	ENSMUSG00000022114	Spry2	0.487236638	0.882486043	1078	775	0.097	0.195	0.856818245	4.37E-10	1.33E-05	up
FB_Cluster_0	ENSMUSG00000022390	Zc3h7b	0.332203313	0.433678551	1078	775	0.063	0.115	0.384458042	4.50E-10	1.37E-05	up
FB_Cluster_0	ENSMUSG00000061462	Obscn	0.913263243	0.424023534	1078	775	0.165	0.101	-1.106704194	4.58E-10	1.39E-05	down
FB_Cluster_0	ENSMUSG00000033855	Ston1	0.827099885	1.093897871	1078	775	0.156	0.248	0.40330204	4.68E-10	1.43E-05	up
FB_Cluster_0	ENSMUSG00000029428	Stx2	0.56815735	0.793472583	1078	775	0.106	0.186	0.481817744	4.75E-10	1.45E-05	up
FB_Cluster_0	ENSMUSG00000031520	Vegfc	0.944203354	1.218419179	1078	775	0.162	0.253	0.367806659	4.87E-10	1.48E-05	up
FB_Cluster_0	ENSMUSG00000027678	Ncoa3	0.738896026	1.000195655	1078	775	0.143	0.232	0.436787966	4.88E-10	1.49E-05	up
FB_Cluster_0	ENSMUSG00000047193	Dync2h1	0.91487054	1.222807349	1078	775	0.166	0.259	0.418517908	4.89E-10	1.49E-05	up
FB_Cluster_0	ENSMUSG00000029924	Slc37a3	0.340650831	0.471803015	1078	775	0.071	0.13	0.469773214	5.01E-10	1.53E-05	up
FB_Cluster_0	ENSMUSG00000020300	Cpeb4	0.558981235	0.721393768	1078	775	0.112	0.179	0.367929009	5.01E-10	1.53E-05	up
FB_Cluster_0	ENSMUSG00000039191	Rbpj	0.882019083	1.17285686	1078	775	0.173	0.27	0.41110462	5.03E-10	1.53E-05	up
FB_Cluster_0	ENSMUSG00000018412	Kansl1	3.10053569	4.136436826	1078	775	0.462	0.613	0.4158594	5.04E-10	1.53E-05	up
FB_Cluster_0	ENSMUSG00000042447	Mios	0.365162066	0.491795141	1078	775	0.071	0.13	0.429418871	5.22E-10	1.59E-05	up
FB_Cluster_0	ENSMUSG00000040483	Xaf1	0.196756362	0.467699825	1078	775	0.039	0.111	1.248747984	5.22E-10	1.59E-05	up
FB_Cluster_0	ENSMUSG00000063316	Rpl27	2.300076706	1.707472828	1078	775	0.368	0.345	-0.429797587	5.41E-10	1.65E-05	down
FB_Cluster_0	ENSMUSG00000019787	Trdn	1.648587182	0.945701015	1078	775	0.255	0.195	-0.801709096	5.50E-10	1.68E-05	down
FB_Cluster_0	ENSMUSG00000060036	Rpl3	1.872705727	1.379828817	1078	775	0.313	0.289	-0.440607403	5.50E-10	1.68E-05	down
FB_Cluster_0	ENSMUSG00000027589	Pcmtd2	0.675053354	1.064628526	1078	775	0.135	0.239	0.657198495	5.54E-10	1.69E-05	up
FB_Cluster_0	ENSMUSG00000040624	Plekhg1	0.723603118	1.047306441	1078	775	0.135	0.228	0.533351489	5.55E-10	1.69E-05	up
FB_Cluster_0	ENSMUSG00000026836	Acvr1	0.541724492	0.896234691	1078	775	0.109	0.206	0.726211926	5.57E-10	1.70E-05	up
FB_Cluster_0	ENSMUSG00000059325	Hopx	0.638132535	0.32427209	1078	775	0.117	0.085	-0.976432464	5.71E-10	1.74E-05	down
FB_Cluster_0	ENSMUSG00000037426	Depdc5	0.536270905	0.73327278	1078	775	0.109	0.183	0.451315737	5.74E-10	1.75E-05	up
FB_Cluster_0	ENSMUSG00000022656	Nectin3	0.816087933	0.600206299	1078	775	0.154	0.154	-0.443202574	5.86E-10	1.79E-05	down
FB_Cluster_0	ENSMUSG00000030768	Disp1	0.461320539	0.626105115	1078	775	0.093	0.16	0.440553068	5.93E-10	1.81E-05	up
FB_Cluster_0	ENSMUSG00000015522	Arnt	1.370443093	1.942555233	1078	775	0.258	0.386	0.503282195	6.03E-10	1.84E-05	up
FB_Cluster_0	ENSMUSG00000047419	Cmya5	1.171707193	0.658794447	1078	775	0.204	0.154	-0.830615937	6.16E-10	1.88E-05	down
FB_Cluster_0	ENSMUSG00000027800	Tm4sf1	1.845172834	1.390434727	1078	775	0.301	0.294	-0.408194368	6.26E-10	1.91E-05	down
FB_Cluster_0	ENSMUSG00000022419	Deptor	0.679673003	0.886118557	1078	775	0.122	0.196	0.382609469	6.41E-10	1.95E-05	up
FB_Cluster_0	ENSMUSG00000028126	Pip5k1a	0.534446797	0.769391287	1078	775	0.101	0.181	0.525588737	6.61E-10	2.01E-05	up
FB_Cluster_0	ENSMUSG00000010663	Fads1	0.509188371	0.362279454	1078	775	0.098	0.103	-0.490981613	6.63E-10	2.02E-05	down
FB_Cluster_0	ENSMUSG00000034593	Myo5a	0.553496617	0.748492759	1078	775	0.107	0.182	0.435345968	7.06E-10	2.15E-05	up
FB_Cluster_0	ENSMUSG00000034761	Map4k5	0.82163701	1.122075927	1078	775	0.15	0.241	0.449550219	7.24E-10	2.21E-05	up
FB_Cluster_0	ENSMUSG00000026640	Plxna2	0.706864622	1.058778775	1078	775	0.135	0.234	0.582827507	7.41E-10	2.26E-05	up
FB_Cluster_0	ENSMUSG00000054204	Alkal2	0.897591114	0.601859855	1078	775	0.144	0.138	-0.576551838	7.49E-10	2.28E-05	down
FB_Cluster_0	ENSMUSG00000032265	Tent5a	0.525687217	0.786750429	1078	775	0.105	0.19	0.581610353	7.52E-10	2.29E-05	up
FB_Cluster_0	ENSMUSG00000071176	Arhgef10	0.410983068	0.652772234	1078	775	0.083	0.16	0.667370737	7.77E-10	2.37E-05	up
FB_Cluster_0	ENSMUSG00000017144	Rnd3	0.635899624	0.901540075	1078	775	0.116	0.201	0.503525729	7.88E-10	2.40E-05	up
FB_Cluster_0	ENSMUSG00000028603	Scp2	1.251666157	0.815023283	1078	775	0.222	0.191	-0.618874896	7.91E-10	2.41E-05	down
FB_Cluster_0	ENSMUSG00000039480	Nt5dc1	0.588828378	0.896576951	1078	775	0.114	0.208	0.60649612	7.93E-10	2.42E-05	up
FB_Cluster_0	ENSMUSG00000085702	Mecomos	0.260498341	0.465245559	1078	775	0.046	0.111	0.836474538	8.03E-10	2.45E-05	up
FB_Cluster_0	ENSMUSG00000025321	Itgb8	0.671537484	0.940986554	1078	775	0.12	0.206	0.486644667	8.04E-10	2.45E-05	up
FB_Cluster_0	ENSMUSG00000029763	Exoc4	2.979230209	4.248676118	1078	775	0.425	0.577	0.512059294	8.18E-10	2.49E-05	up
FB_Cluster_0	ENSMUSG00000028964	Park7	1.330546755	0.776829487	1078	775	0.226	0.174	-0.776272058	8.26E-10	2.52E-05	down
FB_Cluster_0	ENSMUSG00000057113	Npm1	1.021194783	0.683805109	1078	775	0.184	0.173	-0.578531268	8.38E-10	2.55E-05	down
FB_Cluster_0	ENSMUSG00000026817	Ak1	0.782998297	0.417227998	1078	775	0.147	0.107	-0.908011697	8.41E-10	2.56E-05	down
FB_Cluster_0	ENSMUSG00000020064	Herc4	0.904428435	1.259955917	1078	775	0.177	0.283	0.478249995	8.44E-10	2.57E-05	up
FB_Cluster_0	ENSMUSG00000025997	Ikzf2	0.386333336	0.543178242	1078	775	0.069	0.13	0.491471714	8.47E-10	2.58E-05	up
FB_Cluster_0	ENSMUSG00000034723	Tmx4	0.960183551	0.626576172	1078	775	0.175	0.157	-0.615740328	8.62E-10	2.63E-05	down
FB_Cluster_0	ENSMUSG00000024053	Emilin2	0.602156488	0.459396681	1078	775	0.117	0.126	-0.390323591	8.66E-10	2.64E-05	down
FB_Cluster_0	ENSMUSG00000029253	Cenpc1	0.42670154	0.671021892	1078	775	0.083	0.159	0.653009437	8.73E-10	2.66E-05	up
FB_Cluster_0	ENSMUSG00000031642	Sh3rf1	0.952735103	1.264709668	1078	775	0.171	0.267	0.408621831	9.09E-10	2.77E-05	up
FB_Cluster_0	ENSMUSG00000036104	Rab3gap1	0.713985449	0.919153465	1078	775	0.143	0.223	0.36436599	9.09E-10	2.77E-05	up
FB_Cluster_0	ENSMUSG00000034024	Cct2	0.704064225	0.382600962	1078	775	0.129	0.102	-0.879694406	9.11E-10	2.78E-05	down
FB_Cluster_0	ENSMUSG00000070056	Mfhas1	0.317587275	0.491144986	1078	775	0.058	0.12	0.62883538	9.23E-10	2.81E-05	up
FB_Cluster_0	ENSMUSG00000027937	Jtb	0.60609904	0.371773345	1078	775	0.118	0.103	-0.704980226	9.29E-10	2.83E-05	down
FB_Cluster_0	ENSMUSG00000021738	Atxn7	1.110618933	1.552024419	1078	775	0.198	0.31	0.48275042	9.50E-10	2.89E-05	up
FB_Cluster_0	ENSMUSG00000019189	Rnf145	0.343959794	0.449474998	1078	775	0.07	0.124	0.385902494	9.65E-10	2.94E-05	up
FB_Cluster_0	ENSMUSG00000020883	Fbxl20	0.620770973	0.898023925	1078	775	0.122	0.21	0.532621041	9.96E-10	3.04E-05	up
FB_Cluster_0	ENSMUSG00000043017	Ptgir	0.419925525	0.579631014	1078	775	0.08	0.142	0.464906663	1.00E-09	3.06E-05	up
FB_Cluster_0	ENSMUSG00000020263	Appl2	0.39164144	0.511465898	1078	775	0.08	0.137	0.385018346	1.01E-09	3.08E-05	up
FB_Cluster_0	ENSMUSG00000020642	Rnf144a	0.199953712	0.437908357	1078	775	0.041	0.108	1.130571	1.01E-09	3.09E-05	up
FB_Cluster_0	ENSMUSG00000014606	Slc25a11	0.882464416	0.581794217	1078	775	0.168	0.143	-0.600944673	1.04E-09	3.17E-05	down
FB_Cluster_0	ENSMUSG00000030849	Fgfr2	2.63875928	3.486207922	1078	775	0.412	0.556	0.401785579	1.04E-09	3.17E-05	up
FB_Cluster_0	ENSMUSG00000030417	Pdcd5	1.024232536	0.720005614	1078	775	0.18	0.166	-0.508403725	1.05E-09	3.21E-05	down
FB_Cluster_0	ENSMUSG00000022992	Kansl2	0.31209589	0.462840331	1078	775	0.06	0.117	0.568374711	1.08E-09	3.29E-05	up
FB_Cluster_0	ENSMUSG00000029291	Rufy3	0.592724266	0.816601823	1078	775	0.119	0.196	0.462204945	1.08E-09	3.29E-05	up
FB_Cluster_0	ENSMUSG00000034867	Ankrd27	0.319737021	0.443711879	1078	775	0.063	0.117	0.472611346	1.09E-09	3.33E-05	up
FB_Cluster_0	ENSMUSG00000014769	Psmb1	1.05043743	0.795766223	1078	775	0.191	0.196	-0.400529711	1.11E-09	3.40E-05	down
FB_Cluster_0	ENSMUSG00000049134	Nrap	0.817415772	0.454039115	1078	775	0.152	0.115	-0.848112262	1.12E-09	3.41E-05	down
FB_Cluster_0	ENSMUSG00000014301	Pam16	0.699625195	0.339574814	1078	775	0.122	0.085	-1.042634187	1.13E-09	3.44E-05	down
FB_Cluster_0	ENSMUSG00000020402	Vdac1	1.822723201	1.322110431	1078	775	0.308	0.285	-0.463222838	1.13E-09	3.45E-05	down
FB_Cluster_0	ENSMUSG00000018286	Psmb6	0.789914377	0.352458379	1078	775	0.151	0.086	-1.16401674	1.14E-09	3.48E-05	down
FB_Cluster_0	ENSMUSG00000021180	Rps6ka5	0.648720005	0.863044603	1078	775	0.105	0.177	0.411783971	1.15E-09	3.49E-05	up
FB_Cluster_0	ENSMUSG00000021809	Nudt13	0.281831023	0.391860141	1078	775	0.054	0.102	0.475364716	1.20E-09	3.66E-05	up
FB_Cluster_0	ENSMUSG00000035623	Rsf1	0.810080426	1.210494762	1078	775	0.157	0.259	0.579400878	1.21E-09	3.68E-05	up
FB_Cluster_0	ENSMUSG00000027253	Lrp4	0.446713487	0.810389294	1078	775	0.089	0.182	0.859120396	1.21E-09	3.68E-05	up
FB_Cluster_0	ENSMUSG00000060675	Plaat3	0.60713105	0.39341442	1078	775	0.109	0.106	-0.625829061	1.22E-09	3.73E-05	down
FB_Cluster_0	ENSMUSG00000024181	Mrpl28	0.645239707	0.353359386	1078	775	0.111	0.089	-0.868514344	1.23E-09	3.76E-05	down
FB_Cluster_0	ENSMUSG00000036427	Gpi1	0.865351891	0.583249378	1078	775	0.17	0.147	-0.569093428	1.24E-09	3.78E-05	down
FB_Cluster_0	ENSMUSG00000025880	Smad7	0.799623905	0.525875109	1078	775	0.143	0.13	-0.604507485	1.27E-09	3.88E-05	down
FB_Cluster_0	ENSMUSG00000072115	Ang	0.633041457	0.474820622	1078	775	0.116	0.125	-0.414841462	1.27E-09	3.88E-05	down
FB_Cluster_0	ENSMUSG00000029397	Rchy1	0.546130766	0.810437073	1078	775	0.109	0.192	0.5693676	1.31E-09	3.98E-05	up
FB_Cluster_0	ENSMUSG00000020121	Srgap1	0.338953375	0.584759813	1078	775	0.064	0.135	0.786578457	1.35E-09	4.12E-05	up
FB_Cluster_0	ENSMUSG00000024997	Prdx3	0.652530383	0.394865981	1078	775	0.125	0.105	-0.724537756	1.38E-09	4.22E-05	down
FB_Cluster_0	ENSMUSG00000037805	Rpl10a	2.430652154	1.779913817	1078	775	0.383	0.351	-0.44951436	1.39E-09	4.25E-05	down
FB_Cluster_0	ENSMUSG00000024346	Pfdn1	0.688860373	0.482975969	1078	775	0.125	0.123	-0.512170918	1.41E-09	4.29E-05	down
FB_Cluster_0	ENSMUSG00000038412	Higd1a	0.9874691	0.477294815	1078	775	0.176	0.115	-1.0486988	1.42E-09	4.33E-05	down
FB_Cluster_0	ENSMUSG00000024776	Stambpl1	0.354397558	0.51208436	1078	775	0.068	0.13	0.530887509	1.46E-09	4.44E-05	up
FB_Cluster_0	ENSMUSG00000071369	Map3k5	0.841056287	1.241551848	1078	775	0.154	0.258	0.561814923	1.47E-09	4.49E-05	up
FB_Cluster_0	ENSMUSG00000034973	Dop1a	0.926574364	1.251384981	1078	775	0.173	0.274	0.43350661	1.47E-09	4.50E-05	up
FB_Cluster_0	ENSMUSG00000033545	Znrf1	0.384104213	0.553291786	1078	775	0.078	0.145	0.52642789	1.50E-09	4.57E-05	up
FB_Cluster_0	ENSMUSG00000031608	Galnt7	0.695840935	0.976520105	1078	775	0.126	0.215	0.48883261	1.54E-09	4.68E-05	up
FB_Cluster_0	ENSMUSG00000032199	Polr2m	0.735416358	0.424473352	1078	775	0.137	0.11	-0.792743605	1.54E-09	4.70E-05	down
FB_Cluster_0	ENSMUSG00000062169	Cnih4	0.890427014	0.597483325	1078	775	0.167	0.147	-0.575519485	1.56E-09	4.76E-05	down
FB_Cluster_0	ENSMUSG00000026482	Rgl1	0.843794694	1.084561188	1078	775	0.156	0.241	0.362109576	1.57E-09	4.78E-05	up
FB_Cluster_0	ENSMUSG00000009687	Fxyd5	0.993180015	0.65164782	1078	775	0.175	0.156	-0.607886631	1.65E-09	5.04E-05	down
FB_Cluster_0	ENSMUSG00000047638	Nr1h4	0.210617613	0.400969996	1078	775	0.041	0.102	0.928543132	1.70E-09	5.19E-05	up
FB_Cluster_0	ENSMUSG00000033149	Phldb2	0.546580706	0.971737687	1078	775	0.097	0.194	0.830016919	1.79E-09	5.46E-05	up
FB_Cluster_0	ENSMUSG00000075705	Msrb1	0.586129731	0.246750057	1078	775	0.11	0.067	-1.247831162	1.82E-09	5.54E-05	down
FB_Cluster_0	ENSMUSG00000039879	Heca	0.570439035	0.734757742	1078	775	0.109	0.175	0.365139396	1.82E-09	5.55E-05	up
FB_Cluster_0	ENSMUSG00000027859	Ngf	2.388282878	3.227641737	1078	775	0.343	0.481	0.434491017	1.86E-09	5.66E-05	up
FB_Cluster_0	ENSMUSG00000026825	Dnm1	0.549968538	0.716210069	1078	775	0.108	0.174	0.380972832	1.95E-09	5.95E-05	up
FB_Cluster_0	ENSMUSG00000063972	Nr6a1	1.120570629	1.447787169	1078	775	0.184	0.28	0.369586856	1.96E-09	5.98E-05	up
FB_Cluster_0	ENSMUSG00000032754	Slc8b1	0.406798687	0.560724415	1078	775	0.079	0.141	0.462879533	1.99E-09	6.06E-05	up
FB_Cluster_0	ENSMUSG00000021461	Fancc	0.487532247	0.921301107	1078	775	0.102	0.203	0.918035797	2.08E-09	6.34E-05	up
FB_Cluster_0	ENSMUSG00000070509	Rgma	0.967701082	1.299007363	1078	775	0.179	0.277	0.424738209	2.13E-09	6.48E-05	up
FB_Cluster_0	ENSMUSG00000053825	Ppfia2	0.427826145	0.742330265	1078	775	0.072	0.152	0.794893695	2.19E-09	6.69E-05	up
FB_Cluster_0	ENSMUSG00000014077	Chp1	0.3056407	0.472749915	1078	775	0.062	0.124	0.629073724	2.25E-09	6.87E-05	up
FB_Cluster_0	ENSMUSG00000045210	Vcpip1	0.458064175	0.597846159	1078	775	0.093	0.154	0.38415093	2.32E-09	7.07E-05	up
FB_Cluster_0	ENSMUSG00000051154	Commd3	0.676199974	0.515992935	1078	775	0.131	0.135	-0.390032416	2.37E-09	7.22E-05	down
FB_Cluster_0	ENSMUSG00000026596	Abl2	0.54804858	0.857786711	1078	775	0.107	0.195	0.646220144	2.37E-09	7.23E-05	up
FB_Cluster_0	ENSMUSG00000021665	Hexb	1.005503331	0.740292879	1078	775	0.182	0.182	-0.441698408	2.39E-09	7.29E-05	down
FB_Cluster_0	ENSMUSG00000038861	Pi4kb	0.466282065	0.667975837	1078	775	0.094	0.166	0.518499568	2.45E-09	7.47E-05	up
FB_Cluster_0	ENSMUSG00000008892	Vdac3	1.126760762	0.728159845	1078	775	0.2	0.17	-0.629784058	2.46E-09	7.50E-05	down
FB_Cluster_0	ENSMUSG00000036860	Mrpl55	0.635509453	0.27651989	1078	775	0.119	0.072	-1.200235686	2.49E-09	7.59E-05	down
FB_Cluster_0	ENSMUSG00000024006	Stk38	1.324853496	1.782545246	1078	775	0.252	0.366	0.428077905	2.50E-09	7.61E-05	up
FB_Cluster_0	ENSMUSG00000062234	Gak	0.469417718	0.765042007	1078	775	0.095	0.181	0.704547929	2.60E-09	7.91E-05	up
FB_Cluster_0	ENSMUSG00000027656	Ccn5	2.6576349	1.475015074	1078	775	0.281	0.213	-0.849369704	2.64E-09	8.03E-05	down
FB_Cluster_0	ENSMUSG00000041115	Iqsec2	0.650321192	0.907470971	1078	775	0.118	0.196	0.480636199	2.71E-09	8.26E-05	up
FB_Cluster_0	ENSMUSG00000017978	Cadps2	0.365859734	0.697840871	1078	775	0.066	0.148	0.931419897	2.72E-09	8.28E-05	up
FB_Cluster_0	ENSMUSG00000016319	Slc25a5	0.786276972	0.387675091	1078	775	0.14	0.095	-1.020000939	2.80E-09	8.54E-05	down
FB_Cluster_0	ENSMUSG00000047714	Ppp1r2	1.375909025	1.927298459	1078	775	0.239	0.356	0.486164924	2.81E-09	8.57E-05	up
FB_Cluster_0	ENSMUSG00000053289	Ddx10	0.450443767	0.645647564	1078	775	0.081	0.152	0.519303036	2.87E-09	8.75E-05	up
FB_Cluster_0	ENSMUSG00000021668	Polk	0.239028162	0.40235101	1078	775	0.045	0.103	0.751029133	2.89E-09	8.81E-05	up
FB_Cluster_0	ENSMUSG00000067567	Hdac8	1.105521825	1.564336722	1078	775	0.186	0.295	0.500785305	2.90E-09	8.83E-05	up
FB_Cluster_0	ENSMUSG00000005705	Agrp	0.268402452	0.414373054	1078	775	0.048	0.103	0.626343051	2.94E-09	8.95E-05	up
FB_Cluster_0	ENSMUSG00000071076	Jund	1.518524602	1.064526901	1078	775	0.263	0.235	-0.51241736	3.03E-09	9.23E-05	down
FB_Cluster_0	ENSMUSG00000021458	Aopep	1.931948784	2.542782307	1078	775	0.327	0.458	0.396333168	3.03E-09	9.24E-05	up
FB_Cluster_0	ENSMUSG00000022194	Pabpn1	0.552576058	0.735448663	1078	775	0.11	0.179	0.412386675	3.04E-09	9.25E-05	up
FB_Cluster_0	ENSMUSG00000067586	S1pr3	1.110061897	0.677304293	1078	775	0.191	0.157	-0.712681049	3.10E-09	9.45E-05	down
FB_Cluster_0	ENSMUSG00000039105	Atp6v1g1	1.070827273	0.714621154	1078	775	0.185	0.168	-0.583408114	3.14E-09	9.57E-05	down
FB_Cluster_0	ENSMUSG00000006373	Pgrmc1	0.65540915	0.471699181	1078	775	0.124	0.125	-0.474443003	3.27E-09	9.96E-05	down
FB_Cluster_0	ENSMUSG00000035929	H2-Q4	0.420494084	0.684052879	1078	775	0.088	0.169	0.701890186	3.28E-09	0.000100014	up
FB_Cluster_0	ENSMUSG00000045482	Trrap	0.522410292	0.724450894	1078	775	0.107	0.178	0.471627577	3.30E-09	0.000100456	up
FB_Cluster_0	ENSMUSG00000040653	Ppp1r14c	0.722500442	0.289916071	1078	775	0.135	0.068	-1.317065287	3.35E-09	0.000102239	down
FB_Cluster_0	ENSMUSG00000032413	Rasa2	0.512828123	0.721259163	1078	775	0.096	0.166	0.491961079	3.40E-09	0.000103562	up
FB_Cluster_0	ENSMUSG00000025132	Arhgdia	0.652929448	0.479704487	1078	775	0.127	0.132	-0.444701402	3.47E-09	0.000105742	down
FB_Cluster_0	ENSMUSG00000029465	Arpc3	1.149042154	0.864236357	1078	775	0.209	0.204	-0.410892524	3.54E-09	0.000107954	down
FB_Cluster_0	ENSMUSG00000059355	Wdr83os	0.575229429	0.331531958	1078	775	0.103	0.088	-0.794805228	3.58E-09	0.000109255	down
FB_Cluster_0	ENSMUSG00000005779	Psmb4	0.83978384	0.502421762	1078	775	0.155	0.126	-0.741003736	3.59E-09	0.000109551	down
FB_Cluster_0	ENSMUSG00000056938	Acbd4	0.29576828	0.489976432	1078	775	0.059	0.125	0.728051736	3.60E-09	0.000109603	up
FB_Cluster_0	ENSMUSG00000089762	Ier5l	0.522463703	0.403009564	1078	775	0.104	0.112	-0.374434908	3.60E-09	0.000109712	down
FB_Cluster_0	ENSMUSG00000056220	Pla2g4a	0.792286117	1.198696098	1078	775	0.141	0.243	0.597310785	3.62E-09	0.000110193	up
FB_Cluster_0	ENSMUSG00000026839	Upp2	0.89958551	1.204592403	1078	775	0.157	0.246	0.421172134	3.73E-09	0.000113785	up
FB_Cluster_0	ENSMUSG00000027679	Dnajc19	1.535071499	1.182627077	1078	775	0.261	0.255	-0.376282633	3.85E-09	0.000117322	down
FB_Cluster_0	ENSMUSG00000028957	Per3	0.43838288	0.882979834	1078	775	0.085	0.181	1.010023353	3.87E-09	0.000118015	up
FB_Cluster_0	ENSMUSG00000027184	Caprin1	1.227894002	0.9522225	1078	775	0.215	0.223	-0.36678139	3.91E-09	0.000119079	down
FB_Cluster_0	ENSMUSG00000031765	Mt1	1.330392596	1.00952445	1078	775	0.219	0.221	-0.398141728	3.92E-09	0.000119519	down
FB_Cluster_0	ENSMUSG00000031246	Sh3bgrl	1.119282126	1.503173781	1078	775	0.197	0.302	0.425405165	4.05E-09	0.00012331	up
FB_Cluster_0	ENSMUSG00000028152	Tspan5	0.538647181	0.700644849	1078	775	0.096	0.163	0.379280819	4.07E-09	0.000123913	up
FB_Cluster_0	ENSMUSG00000104302	Gm36975	0.578094139	0.935442763	1078	775	0.098	0.188	0.694249614	4.07E-09	0.000123929	up
FB_Cluster_0	ENSMUSG00000027363	Usp8	0.639323904	0.837919001	1078	775	0.127	0.201	0.390210277	4.14E-09	0.000126264	up
FB_Cluster_0	ENSMUSG00000007836	Hnrnpa0	0.879732283	0.671675809	1078	775	0.16	0.165	-0.389248693	4.15E-09	0.000126634	down
FB_Cluster_0	ENSMUSG00000031153	Gripap1	0.349958915	0.540251117	1078	775	0.07	0.134	0.626299416	4.25E-09	0.000129396	up
FB_Cluster_0	ENSMUSG00000051041	Olfml1	0.789316698	1.100617097	1078	775	0.154	0.246	0.479584779	4.25E-09	0.000129644	up
FB_Cluster_0	ENSMUSG00000041926	Rnpep	0.329559377	0.429883125	1078	775	0.063	0.112	0.383303924	4.29E-09	0.000130699	up
FB_Cluster_0	ENSMUSG00000031129	Slc9a9	0.500424866	0.649248215	1078	775	0.09	0.155	0.375550593	4.32E-09	0.000131621	up
FB_Cluster_0	ENSMUSG00000028291	Akirin2	0.596748514	0.392317997	1078	775	0.108	0.106	-0.604973599	4.38E-09	0.000133543	down
FB_Cluster_0	ENSMUSG00000099083	Atf7	0.355944753	0.493319365	1078	775	0.072	0.13	0.470755745	4.38E-09	0.000133646	up
FB_Cluster_0	ENSMUSG00000042439	Zfp532	0.416981825	0.621764184	1078	775	0.086	0.155	0.576269084	4.42E-09	0.000134621	up
FB_Cluster_0	ENSMUSG00000061132	Blnk	0.653689623	1.086867504	1078	775	0.118	0.215	0.733410427	4.43E-09	0.000134968	up
FB_Cluster_0	ENSMUSG00000022744	Cldnd1	0.638435211	0.463040252	1078	775	0.121	0.125	-0.46331703	4.47E-09	0.000136145	down
FB_Cluster_0	ENSMUSG00000015092	Edf1	0.770095871	0.418499972	1078	775	0.151	0.106	-0.879653175	4.50E-09	0.000137266	down
FB_Cluster_0	ENSMUSG00000094958	3110021N24Rik	0.672791997	0.875520126	1078	775	0.118	0.195	0.379930152	4.54E-09	0.000138296	up
FB_Cluster_0	ENSMUSG00000029439	Sfswap	0.783036845	1.027662844	1078	775	0.155	0.239	0.392171072	4.57E-09	0.000139296	up
FB_Cluster_0	ENSMUSG00000030934	Oat	0.754895068	0.480449756	1078	775	0.148	0.123	-0.651781403	4.60E-09	0.000140344	down
FB_Cluster_0	ENSMUSG00000066456	Hmgn3	0.246613923	0.453695975	1078	775	0.048	0.112	0.879204679	4.68E-09	0.00014252	up
FB_Cluster_0	ENSMUSG00000070372	Capza1	0.618832598	0.804231631	1078	775	0.121	0.194	0.378008148	4.71E-09	0.000143647	up
FB_Cluster_0	ENSMUSG00000040383	Aqr	0.394548864	0.551081227	1078	775	0.08	0.141	0.481957155	4.75E-09	0.000144657	up
FB_Cluster_0	ENSMUSG00000039942	Ptger4	0.282631541	0.430655588	1078	775	0.054	0.111	0.607436676	4.77E-09	0.000145455	up
FB_Cluster_0	ENSMUSG00000027881	Prpf38b	0.709701702	0.929408581	1078	775	0.141	0.219	0.389052152	4.87E-09	0.000148389	up
FB_Cluster_0	ENSMUSG00000021481	Zfp346	0.335527646	0.552004732	1078	775	0.069	0.139	0.718080407	4.87E-09	0.000148396	up
FB_Cluster_0	ENSMUSG00000068245	Phf11d	0.195014514	0.416665111	1078	775	0.038	0.101	1.094913407	4.88E-09	0.000148869	up
FB_Cluster_0	ENSMUSG00000035376	Hacd2	0.573565305	0.336936988	1078	775	0.11	0.092	-0.767302338	5.16E-09	0.000157147	down
FB_Cluster_0	ENSMUSG00000032419	Tbx18	0.255972335	0.450685044	1078	775	0.047	0.11	0.815888252	5.26E-09	0.000160235	up
FB_Cluster_0	ENSMUSG00000018906	P4ha2	0.613908613	0.388538755	1078	775	0.115	0.105	-0.659829119	5.29E-09	0.000161282	down
FB_Cluster_0	ENSMUSG00000042211	Fbxo38	0.465892977	0.619228872	1078	775	0.095	0.159	0.410397493	5.38E-09	0.00016403	up
FB_Cluster_0	ENSMUSG00000041215	Yeats2	0.483025876	0.726442458	1078	775	0.097	0.174	0.588647984	5.41E-09	0.000164837	up
FB_Cluster_0	ENSMUSG00000014496	Ankrd28	0.624156226	0.979642162	1078	775	0.116	0.209	0.650263822	5.46E-09	0.000166487	up
FB_Cluster_0	ENSMUSG00000031749	St3gal2	0.485739838	0.659018646	1078	775	0.098	0.166	0.440057391	5.49E-09	0.000167179	up
FB_Cluster_0	ENSMUSG00000045954	Cavin2	0.741059799	0.557784602	1078	775	0.128	0.134	-0.409817899	5.50E-09	0.000167544	down
FB_Cluster_0	ENSMUSG00000054280	Prr14l	0.346980467	0.459296136	1078	775	0.072	0.125	0.404468549	5.53E-09	0.000168591	up
FB_Cluster_0	ENSMUSG00000023020	Cox14	0.942223262	0.626237572	1078	775	0.173	0.152	-0.589281633	5.55E-09	0.000169231	down
FB_Cluster_0	ENSMUSG00000079036	Alkbh1	0.367788685	0.553436657	1078	775	0.067	0.134	0.589409554	5.56E-09	0.000169534	up
FB_Cluster_0	ENSMUSG00000039463	Slc9a8	0.313746869	0.474249289	1078	775	0.063	0.123	0.595888967	5.63E-09	0.000171729	up
FB_Cluster_0	ENSMUSG00000015214	Mtmr1	0.394189862	0.541147195	1078	775	0.074	0.135	0.457031026	6.07E-09	0.00018498	up
FB_Cluster_0	ENSMUSG00000028945	Rheb	0.915382456	0.679906852	1078	775	0.173	0.168	-0.428982954	6.24E-09	0.000190293	down
FB_Cluster_0	ENSMUSG00000040280	Ndufa4l2	0.7009767	0.42910608	1078	775	0.121	0.111	-0.707901776	6.50E-09	0.000198194	down
FB_Cluster_0	ENSMUSG00000020432	Tcn2	0.519027302	0.672186943	1078	775	0.101	0.166	0.372988766	6.53E-09	0.000199074	up
FB_Cluster_0	ENSMUSG00000034832	Tet3	0.532935347	0.694462917	1078	775	0.103	0.169	0.381874181	6.74E-09	0.000205518	up
FB_Cluster_0	ENSMUSG00000043998	Mgat2	0.844282901	0.636033889	1078	775	0.159	0.159	-0.408566917	6.82E-09	0.000207774	down
FB_Cluster_0	ENSMUSG00000025651	Uqcrc1	1.394165578	0.976811858	1078	775	0.262	0.222	-0.513205085	6.98E-09	0.000212681	down
FB_Cluster_0	ENSMUSG00000022565	Plec	1.007962637	0.756761158	1078	775	0.192	0.19	-0.413484709	7.33E-09	0.000223316	down
FB_Cluster_0	ENSMUSG00000025260	Hsd17b10	0.679003055	0.297086888	1078	775	0.126	0.075	-1.192260056	7.35E-09	0.000224173	down
FB_Cluster_0	ENSMUSG00000041361	Myzap	0.96780003	0.55233457	1078	775	0.173	0.132	-0.809054444	7.62E-09	0.000232331	down
FB_Cluster_0	ENSMUSG00000039640	Mrpl12	0.81938458	0.396504052	1078	775	0.149	0.093	-1.047017387	7.92E-09	0.000241369	down
FB_Cluster_0	ENSMUSG00000026511	Srp9	0.677383339	0.418109583	1078	775	0.123	0.105	-0.695959346	8.02E-09	0.000244516	down
FB_Cluster_0	ENSMUSG00000091337	Eid1	0.652630838	0.483265071	1078	775	0.12	0.128	-0.433374976	8.03E-09	0.000244598	down
FB_Cluster_0	ENSMUSG00000045636	Mtus1	0.713409645	1.051797746	1078	775	0.139	0.232	0.55998963	8.07E-09	0.00024585	up
FB_Cluster_0	ENSMUSG00000000085	Scmh1	1.260247917	1.739160951	1078	775	0.221	0.33	0.464652363	8.16E-09	0.00024876	up
FB_Cluster_0	ENSMUSG00000029669	Tspan12	0.25657307	0.408821883	1078	775	0.047	0.103	0.671893334	8.35E-09	0.000254386	up
FB_Cluster_0	ENSMUSG00000026111	Unc50	0.700773957	0.444661676	1078	775	0.134	0.115	-0.656122539	8.74E-09	0.000266236	down
FB_Cluster_0	ENSMUSG00000002010	Idh3g	0.864732553	0.58683884	1078	775	0.158	0.143	-0.559210649	8.74E-09	0.000266344	down
FB_Cluster_0	ENSMUSG00000032625	Thsd7a	11.8134771	15.22813908	1078	775	0.776	0.872	0.366303253	8.99E-09	0.000274154	up
FB_Cluster_0	ENSMUSG00000021290	Atp5mpl	2.568607737	1.998097559	1078	775	0.389	0.375	-0.362343525	9.02E-09	0.000274941	down
FB_Cluster_0	ENSMUSG00000055322	Tns1	1.844528179	1.354795847	1078	775	0.304	0.279	-0.445148088	9.11E-09	0.000277711	down
FB_Cluster_0	ENSMUSG00000030557	Mef2a	1.583592079	2.12509174	1078	775	0.282	0.403	0.424301155	9.45E-09	0.000288043	up
FB_Cluster_0	ENSMUSG00000021814	Anxa7	0.438972718	0.56731787	1078	775	0.084	0.142	0.369951693	9.47E-09	0.000288674	up
FB_Cluster_0	ENSMUSG00000026289	Atg16l1	0.423147094	0.577658332	1078	775	0.083	0.142	0.448965997	9.75E-09	0.000297305	up
FB_Cluster_0	ENSMUSG00000025510	Cd151	0.774347686	0.583214235	1078	775	0.145	0.15	-0.408894506	1.03E-08	0.000313887	down
FB_Cluster_0	ENSMUSG00000068039	Tcp1	0.882899841	0.643564982	1078	775	0.166	0.156	-0.456103194	1.04E-08	0.000316837	down
FB_Cluster_0	ENSMUSG00000031534	Smim19	0.630012862	0.409952543	1078	775	0.119	0.11	-0.619801474	1.08E-08	0.000327942	down
FB_Cluster_0	ENSMUSG00000048118	Arid4a	0.795011589	1.047277403	1078	775	0.145	0.226	0.397552132	1.10E-08	0.000333879	up
FB_Cluster_0	ENSMUSG00000004936	Map2k1	0.367780062	0.493467131	1078	775	0.071	0.126	0.424010834	1.12E-08	0.00034125	up
FB_Cluster_0	ENSMUSG00000033701	Acbd6	0.751330622	0.521818036	1078	775	0.138	0.132	-0.525816652	1.17E-08	0.000356405	down
FB_Cluster_0	ENSMUSG00000061950	Ppp4r1	0.455901598	0.654795896	1078	775	0.09	0.159	0.52222671	1.18E-08	0.000360291	up
FB_Cluster_0	ENSMUSG00000002222	Rmnd5a	0.675616526	0.994300436	1078	775	0.136	0.225	0.557408788	1.19E-08	0.000362733	up
FB_Cluster_0	ENSMUSG00000020937	Plcd3	0.30911173	0.444313772	1078	775	0.059	0.115	0.523308474	1.20E-08	0.000364859	up
FB_Cluster_0	ENSMUSG00000022337	Emc2	0.681394926	0.394958248	1078	775	0.123	0.101	-0.786637533	1.20E-08	0.000365166	down
FB_Cluster_0	ENSMUSG00000020803	Txndc17	0.725833519	0.493988409	1078	775	0.13	0.123	-0.555068221	1.21E-08	0.000367584	down
FB_Cluster_0	ENSMUSG00000043831	Lysmd4	0.875583103	1.146673934	1078	775	0.154	0.237	0.389100238	1.25E-08	0.000379558	up
FB_Cluster_0	ENSMUSG00000031536	Polb	0.492498074	0.638594168	1078	775	0.095	0.155	0.374714291	1.28E-08	0.000389712	up
FB_Cluster_0	ENSMUSG00000033910	Gucy1a1	0.528153281	0.961652473	1078	775	0.091	0.181	0.86443581	1.28E-08	0.000390098	up
FB_Cluster_0	ENSMUSG00000071644	Eef1g	1.003805962	0.697775312	1078	775	0.194	0.173	-0.524582934	1.29E-08	0.000392623	down
FB_Cluster_0	ENSMUSG00000057841	Rpl32	3.046146685	2.294737634	1078	775	0.463	0.427	-0.408640693	1.29E-08	0.000393506	down
FB_Cluster_0	ENSMUSG00000000378	Ccm2	0.526000302	0.758567652	1078	775	0.107	0.182	0.528130148	1.32E-08	0.000401054	up
FB_Cluster_0	ENSMUSG00000060143	Gm10076	1.243243501	0.96486816	1078	775	0.225	0.219	-0.365671683	1.32E-08	0.000401698	down
FB_Cluster_0	ENSMUSG00000013787	Ehmt2	0.282819341	0.392015545	1078	775	0.058	0.107	0.470888031	1.33E-08	0.000405286	up
FB_Cluster_0	ENSMUSG00000033763	Mtss2	0.20238595	0.434983469	1078	775	0.038	0.101	1.103470394	1.37E-08	0.00041608	up
FB_Cluster_0	ENSMUSG00000020941	Map3k14	0.724877952	1.037828607	1078	775	0.136	0.226	0.517698188	1.37E-08	0.000417424	up
FB_Cluster_0	ENSMUSG00000035357	Pdzrn3	0.967081777	1.525345689	1078	775	0.169	0.279	0.657371849	1.38E-08	0.000419317	up
FB_Cluster_0	ENSMUSG00000003778	Brd8	0.702988047	1.109765375	1078	775	0.133	0.228	0.658607418	1.38E-08	0.00042022	up
FB_Cluster_0	ENSMUSG00000024778	Fas	0.348135142	0.553549871	1078	775	0.071	0.139	0.668912104	1.39E-08	0.00042215	up
FB_Cluster_0	ENSMUSG00000009647	Mcu	0.888897607	1.197067533	1078	775	0.163	0.253	0.429373618	1.47E-08	0.00044801	up
FB_Cluster_0	ENSMUSG00000021091	Serpina3n	1.017435961	1.490971893	1078	775	0.177	0.283	0.551270037	1.47E-08	0.00044875	up
FB_Cluster_0	ENSMUSG00000028439	Fam219a	0.463936697	0.748691083	1078	775	0.087	0.168	0.690324354	1.49E-08	0.000455153	up
FB_Cluster_0	ENSMUSG00000036099	Vezt	0.316790577	0.584496046	1078	775	0.068	0.145	0.883455308	1.53E-08	0.00046642	up
FB_Cluster_0	ENSMUSG00000029038	Ssu72	0.722103173	0.554170667	1078	775	0.123	0.134	-0.3818141	1.53E-08	0.0004673	down
FB_Cluster_0	ENSMUSG00000052917	Senp7	0.959567036	1.298465905	1078	775	0.178	0.274	0.436313393	1.57E-08	0.000477004	up
FB_Cluster_0	ENSMUSG00000074785	Plxnc1	0.438427977	0.675632789	1078	775	0.086	0.157	0.623783976	1.57E-08	0.000477954	up
FB_Cluster_0	ENSMUSG00000007670	Khsrp	0.456650485	0.58854184	1078	775	0.087	0.146	0.36598383	1.57E-08	0.000478606	up
FB_Cluster_0	ENSMUSG00000032872	Cyb5r4	0.344033587	0.459306488	1078	775	0.066	0.116	0.416802526	1.60E-08	0.000487609	up
FB_Cluster_0	ENSMUSG00000013160	Atp6v0d1	0.452036329	0.595628169	1078	775	0.09	0.15	0.397896338	1.63E-08	0.000496183	up
FB_Cluster_0	ENSMUSG00000021408	Ripk1	0.399062565	0.568968476	1078	775	0.079	0.143	0.511625835	1.65E-08	0.000502788	up
FB_Cluster_0	ENSMUSG00000056536	Pign	0.87350382	1.126991297	1078	775	0.167	0.25	0.367553313	1.65E-08	0.000504203	up
FB_Cluster_0	ENSMUSG00000033307	Mif	0.918040774	0.510460629	1078	775	0.168	0.123	-0.846633082	1.69E-08	0.000514404	down
FB_Cluster_0	ENSMUSG00000038828	Tmem214	0.407220882	0.531873002	1078	775	0.08	0.133	0.385187253	1.69E-08	0.000515445	up
FB_Cluster_0	ENSMUSG00000060301	2610008E11Rik	0.365723246	0.504680386	1078	775	0.075	0.13	0.464509098	1.73E-08	0.000527737	up
FB_Cluster_0	ENSMUSG00000049624	Slc17a5	0.322718185	0.501327833	1078	775	0.063	0.124	0.635320228	1.76E-08	0.000536589	up
FB_Cluster_0	ENSMUSG00000019990	Pde7b	0.693127362	1.127290642	1078	775	0.1	0.192	0.701586993	1.78E-08	0.00054113	up
FB_Cluster_0	ENSMUSG00000021508	Cxcl14	5.947754683	3.630571449	1078	775	0.38	0.276	-0.712133018	1.85E-08	0.00056483	down
FB_Cluster_0	ENSMUSG00000028986	Klhl7	0.418784449	0.592776933	1078	775	0.074	0.135	0.501180341	1.86E-08	0.00056623	up
FB_Cluster_0	ENSMUSG00000042228	Lyn	0.511876795	0.705255343	1078	775	0.096	0.164	0.462271816	1.89E-08	0.000575549	up
FB_Cluster_0	ENSMUSG00000030551	Nr2f2	0.394347576	0.559126961	1078	775	0.076	0.138	0.503600343	1.95E-08	0.000593386	up
FB_Cluster_0	ENSMUSG00000020664	Dld	0.8939234	0.585687479	1078	775	0.161	0.146	-0.609935235	1.97E-08	0.000601487	down
FB_Cluster_0	ENSMUSG00000047804	Akap10	0.882827001	1.204206136	1078	775	0.164	0.255	0.447836106	1.99E-08	0.000605399	up
FB_Cluster_0	ENSMUSG00000033318	Gstt2	0.364628281	0.526891877	1078	775	0.068	0.128	0.530958655	2.02E-08	0.000616979	up
FB_Cluster_0	ENSMUSG00000027364	Usp50	0.89191242	1.218370005	1078	775	0.163	0.254	0.449935033	2.04E-08	0.00062131	up
FB_Cluster_0	ENSMUSG00000068184	Ndufaf2	0.58634336	0.426641062	1078	775	0.11	0.112	-0.458630838	2.05E-08	0.000626201	down
FB_Cluster_0	ENSMUSG00000001998	Ap4e1	0.295617195	0.442124205	1078	775	0.057	0.114	0.580559859	2.08E-08	0.000634815	up
FB_Cluster_0	ENSMUSG00000049107	Ntf3	0.604526733	0.935004952	1078	775	0.113	0.197	0.629083528	2.09E-08	0.000637066	up
FB_Cluster_0	ENSMUSG00000015127	Unkl	0.235137891	0.417344639	1078	775	0.046	0.106	0.827464419	2.11E-08	0.000642729	up
FB_Cluster_0	ENSMUSG00000025743	Sdc3	0.248824005	0.442146332	1078	775	0.05	0.112	0.829144814	2.12E-08	0.00064738	up
FB_Cluster_0	ENSMUSG00000022312	Eif3h	0.88811566	0.618927444	1078	775	0.158	0.148	-0.520906635	2.12E-08	0.000647519	down
FB_Cluster_0	ENSMUSG00000078919	Dpm1	0.326306975	0.571201242	1078	775	0.067	0.138	0.807579779	2.17E-08	0.000662308	up
FB_Cluster_0	ENSMUSG00000029471	Camkk2	0.396877065	0.559355657	1078	775	0.083	0.147	0.494968125	2.18E-08	0.000665074	up
FB_Cluster_0	ENSMUSG00000029833	Trim24	1.487918963	1.111575196	1078	775	0.24	0.23	-0.420657582	2.18E-08	0.000665891	down
FB_Cluster_0	ENSMUSG00000026000	Lancl1	0.313480261	0.461481465	1078	775	0.06	0.117	0.557750541	2.30E-08	0.000701657	up
FB_Cluster_0	ENSMUSG00000038058	Nod1	0.499828455	0.660703626	1078	775	0.099	0.163	0.402499961	2.38E-08	0.000726596	up
FB_Cluster_0	ENSMUSG00000038780	Smurf1	0.339353717	0.49474677	1078	775	0.071	0.13	0.543766979	2.40E-08	0.000732544	up
FB_Cluster_0	ENSMUSG00000028088	Fmo5	0.540450531	0.808147876	1078	775	0.104	0.182	0.580368322	2.41E-08	0.000733075	up
FB_Cluster_0	ENSMUSG00000041777	Cir1	0.373204768	0.616641331	1078	775	0.07	0.141	0.724311597	2.45E-08	0.000745861	up
FB_Cluster_0	ENSMUSG00000019927	Ube2d1	0.303788176	0.486626196	1078	775	0.06	0.121	0.679569884	2.47E-08	0.000754163	up
FB_Cluster_0	ENSMUSG00000026896	Ifih1	0.289648565	0.539643206	1078	775	0.058	0.126	0.897471665	2.52E-08	0.000766977	up
FB_Cluster_0	ENSMUSG00000052539	Magi3	1.766838234	2.387090692	1078	775	0.277	0.397	0.434062207	2.52E-08	0.00076927	up
FB_Cluster_0	ENSMUSG00000063787	Chchd1	0.65663679	0.419366204	1078	775	0.125	0.11	-0.646760699	2.78E-08	0.000847338	down
FB_Cluster_0	ENSMUSG00000035614	Togaram1	0.426725507	0.699311176	1078	775	0.087	0.164	0.712494457	2.79E-08	0.000851459	up
FB_Cluster_0	ENSMUSG00000034614	Pik3ip1	0.281106695	0.506442673	1078	775	0.052	0.115	0.849052866	2.86E-08	0.000870308	up
FB_Cluster_0	ENSMUSG00000024583	Txnl1	0.824149566	0.57884823	1078	775	0.156	0.15	-0.509646875	2.94E-08	0.000896908	down
FB_Cluster_0	ENSMUSG00000029772	Ahcyl2	0.380874644	0.522203932	1078	775	0.065	0.12	0.455194583	2.99E-08	0.000911617	up
FB_Cluster_0	ENSMUSG00000018425	Dhx40	0.509167894	0.731578751	1078	775	0.098	0.17	0.522785595	3.11E-08	0.000948165	up
FB_Cluster_0	ENSMUSG00000067847	Romo1	1.045126689	0.650711183	1078	775	0.187	0.151	-0.683504923	3.21E-08	0.000978692	down
FB_Cluster_0	ENSMUSG00000063229	Ldha	1.092276722	0.735452592	1078	775	0.195	0.17	-0.570570073	3.38E-08	0.001030221	down
FB_Cluster_0	ENSMUSG00000020496	Rnf187	0.514239637	0.358314624	1078	775	0.103	0.099	-0.521091834	3.51E-08	0.001068735	down
FB_Cluster_0	ENSMUSG00000017692	Rhbdl3	0.279191994	0.405343351	1078	775	0.054	0.105	0.537726139	3.55E-08	0.001081578	up
FB_Cluster_0	ENSMUSG00000052560	Cpne8	0.841684023	1.130348497	1078	775	0.155	0.24	0.425373232	3.59E-08	0.001093508	up
FB_Cluster_0	ENSMUSG00000027993	Trim2	0.554534895	0.846797647	1078	775	0.104	0.183	0.610649233	3.69E-08	0.00112458	up
FB_Cluster_0	ENSMUSG00000102758	Naaladl2	5.604032371	7.595123109	1078	775	0.539	0.672	0.438601311	3.75E-08	0.001143167	up
FB_Cluster_0	ENSMUSG00000032012	Nectin1	0.633097273	0.47184689	1078	775	0.119	0.123	-0.424030527	3.83E-08	0.001165887	down
FB_Cluster_0	ENSMUSG00000019951	Uhrf1bp1l	0.415375087	0.571828099	1078	775	0.081	0.141	0.461071818	3.85E-08	0.001172787	up
FB_Cluster_0	ENSMUSG00000009741	Ubp1	0.408807953	0.608621362	1078	775	0.087	0.154	0.574005871	3.88E-08	0.001182586	up
FB_Cluster_0	ENSMUSG00000005501	Usp40	0.638221618	0.907107049	1078	775	0.125	0.206	0.507148341	3.89E-08	0.001185752	up
FB_Cluster_0	ENSMUSG00000029413	Naaa	0.548632239	0.325309364	1078	775	0.108	0.089	-0.753846572	3.92E-08	0.00119335	down
FB_Cluster_0	ENSMUSG00000027187	Cat	0.447516854	0.656546531	1078	775	0.085	0.154	0.552852626	4.03E-08	0.001227382	up
FB_Cluster_0	ENSMUSG00000090112	Shprh	0.744066062	0.965470225	1078	775	0.144	0.219	0.375756591	4.08E-08	0.001244674	up
FB_Cluster_0	ENSMUSG00000044627	Swi5	1.073381629	0.722960797	1078	775	0.196	0.174	-0.570108637	4.30E-08	0.001309697	down
FB_Cluster_0	ENSMUSG00000029798	Herc6	0.524107514	0.801937865	1078	775	0.1	0.178	0.613532317	4.44E-08	0.001352512	up
FB_Cluster_0	ENSMUSG00000028549	Itgb3bp	0.585035708	0.773254956	1078	775	0.1	0.165	0.402359476	4.46E-08	0.001360246	up
FB_Cluster_0	ENSMUSG00000078713	Tomm5	0.837112391	0.470479138	1078	775	0.157	0.119	-0.831156299	4.49E-08	0.00136813	down
FB_Cluster_0	ENSMUSG00000033075	Senp1	0.327929152	0.522515728	1078	775	0.064	0.128	0.671926512	4.52E-08	0.00137843	up
FB_Cluster_0	ENSMUSG00000015968	Cacna1d	0.577058847	0.81405261	1078	775	0.1	0.173	0.496330813	4.60E-08	0.001401033	up
FB_Cluster_0	ENSMUSG00000004319	Clcn3	0.707458324	1.03846042	1078	775	0.135	0.223	0.55366417	4.62E-08	0.001409111	up
FB_Cluster_0	ENSMUSG00000014905	Dnajb9	0.780726879	0.532734577	1078	775	0.15	0.135	-0.551315012	4.77E-08	0.001452567	down
FB_Cluster_0	ENSMUSG00000049751	Rpl36al	0.8009306	0.593933691	1078	775	0.153	0.15	-0.431312599	4.95E-08	0.001508559	down
FB_Cluster_0	ENSMUSG00000025066	Sfr1	1.227854576	0.827823841	1078	775	0.212	0.185	-0.568687225	4.95E-08	0.001508684	down
FB_Cluster_0	ENSMUSG00000101585	1600010M07Rik	0.879749669	1.157593937	1078	775	0.16	0.24	0.395924943	5.21E-08	0.001587755	up
FB_Cluster_0	ENSMUSG00000002395	Use1	0.719096056	0.464743643	1078	775	0.135	0.115	-0.629639584	5.25E-08	0.001599427	down
FB_Cluster_0	ENSMUSG00000045867	Cradd	0.740507377	0.979280475	1078	775	0.129	0.206	0.403160515	5.27E-08	0.001605126	up
FB_Cluster_0	ENSMUSG00000021807	Rtraf	0.682060053	0.507193234	1078	775	0.136	0.132	-0.427290355	5.31E-08	0.001619661	down
FB_Cluster_0	ENSMUSG00000055839	Elob	1.9980081	1.322314658	1078	775	0.325	0.266	-0.595460016	5.45E-08	0.001660906	down
FB_Cluster_0	ENSMUSG00000028036	Ptgfr	0.356668631	0.518402658	1078	775	0.067	0.124	0.539362614	5.45E-08	0.001660914	up
FB_Cluster_0	ENSMUSG00000071252	2210408I21Rik	0.923871808	1.294130356	1078	775	0.139	0.226	0.486173683	5.51E-08	0.001679509	up
FB_Cluster_0	ENSMUSG00000022594	Lynx1	0.584828171	0.423961816	1078	775	0.113	0.111	-0.463984888	5.84E-08	0.001781194	down
FB_Cluster_0	ENSMUSG00000036667	Tcaf1	0.637387813	0.913115919	1078	775	0.125	0.208	0.518558247	6.06E-08	0.001847749	up
FB_Cluster_0	ENSMUSG00000031380	Vegfd	0.466344574	0.659416018	1078	775	0.065	0.129	0.499702038	6.12E-08	0.001866555	up
FB_Cluster_0	ENSMUSG00000010376	Nedd8	0.961655994	0.654803376	1078	775	0.164	0.152	-0.554388849	6.15E-08	0.001873213	down
FB_Cluster_0	ENSMUSG00000005102	Eif2ak4	0.272442641	0.511218725	1078	775	0.054	0.119	0.907740896	6.18E-08	0.001884427	up
FB_Cluster_0	ENSMUSG00000037818	Abhd18	0.620937461	1.054218404	1078	775	0.119	0.213	0.763558427	6.24E-08	0.001902638	up
FB_Cluster_0	ENSMUSG00000116858	Gm49797	0.451458018	0.686225747	1078	775	0.087	0.159	0.603982115	6.26E-08	0.001907151	up
FB_Cluster_0	ENSMUSG00000053329	Gatd3a	0.638638926	0.359411204	1078	775	0.12	0.092	-0.829189641	6.31E-08	0.001923078	down
FB_Cluster_0	ENSMUSG00000073418	C4b	1.063212899	1.455578902	1078	775	0.137	0.226	0.453125957	6.41E-08	0.00195236	up
FB_Cluster_0	ENSMUSG00000042705	Commd10	0.465823459	0.617387318	1078	775	0.09	0.147	0.406316537	6.41E-08	0.001954951	up
FB_Cluster_0	ENSMUSG00000042901	Aida	0.437606909	0.567047593	1078	775	0.088	0.142	0.373759072	6.51E-08	0.001982899	up
FB_Cluster_0	ENSMUSG00000016349	Eef1a2	0.989975058	0.666265618	1078	775	0.175	0.148	-0.571223937	6.57E-08	0.002001366	down
FB_Cluster_0	ENSMUSG00000038174	Fam126b	0.410874314	0.571873492	1078	775	0.078	0.135	0.47690006	6.60E-08	0.002010602	up
FB_Cluster_0	ENSMUSG00000030061	Uba3	0.284497852	0.393195702	1078	775	0.058	0.103	0.466689645	6.62E-08	0.002017682	up
FB_Cluster_0	ENSMUSG00000091243	Vgll3	1.387876678	1.80565118	1078	775	0.219	0.32	0.379615787	6.63E-08	0.002019944	up
FB_Cluster_0	ENSMUSG00000016493	Cd46	0.507384499	0.728130024	1078	775	0.088	0.159	0.521030466	6.70E-08	0.00204209	up
FB_Cluster_0	ENSMUSG00000045503	Sys1	0.648859997	0.42860918	1078	775	0.124	0.112	-0.598130241	6.75E-08	0.002056359	down
FB_Cluster_0	ENSMUSG00000020519	Sap30l	0.595584623	0.433274907	1078	775	0.122	0.116	-0.458933096	6.86E-08	0.002091666	down
FB_Cluster_0	ENSMUSG00000039914	Coq10a	0.599361935	0.371974513	1078	775	0.115	0.098	-0.688076575	6.98E-08	0.002127591	down
FB_Cluster_0	ENSMUSG00000028851	Nudc	0.680722433	0.383170623	1078	775	0.131	0.101	-0.828915152	7.03E-08	0.002143355	down
FB_Cluster_0	ENSMUSG00000039156	Stim2	0.737960572	0.965274316	1078	775	0.14	0.215	0.387349221	7.16E-08	0.002181933	up
FB_Cluster_0	ENSMUSG00000061474	Mrps36	0.618892986	0.432402851	1078	775	0.11	0.107	-0.517213417	7.36E-08	0.002243743	down
FB_Cluster_0	ENSMUSG00000020326	Ccng1	0.836972433	0.592925704	1078	775	0.157	0.143	-0.497257828	7.37E-08	0.002247099	down
FB_Cluster_0	ENSMUSG00000030357	Fkbp4	0.868460674	0.485012093	1078	775	0.165	0.12	-0.840308488	7.38E-08	0.002250079	down
FB_Cluster_0	ENSMUSG00000020873	Slc35b1	0.757845448	0.478783778	1078	775	0.141	0.123	-0.662418449	7.47E-08	0.002277196	down
FB_Cluster_0	ENSMUSG00000042348	Arl15	4.203901409	5.554079215	1078	775	0.527	0.659	0.401810576	7.53E-08	0.002296464	up
FB_Cluster_0	ENSMUSG00000057193	Slc44a2	0.394880609	0.524006777	1078	775	0.078	0.133	0.408078936	7.58E-08	0.002311147	up
FB_Cluster_0	ENSMUSG00000038241	Cep250	0.28266485	0.451101532	1078	775	0.056	0.114	0.674169174	7.64E-08	0.002327865	up
FB_Cluster_0	ENSMUSG00000059834	Sclt1	0.718369593	0.975790157	1078	775	0.134	0.213	0.441791671	7.66E-08	0.002333372	up
FB_Cluster_0	ENSMUSG00000020546	Stxbp4	0.409656885	0.645820526	1078	775	0.081	0.15	0.656588475	7.69E-08	0.002344049	up
FB_Cluster_0	ENSMUSG00000057388	Mrpl18	0.98001823	0.517657208	1078	775	0.177	0.116	-0.920680055	7.70E-08	0.002345645	down
FB_Cluster_0	ENSMUSG00000025289	Prdx4	1.345698132	1.032693763	1078	775	0.246	0.234	-0.381909831	7.71E-08	0.002351415	down
FB_Cluster_0	ENSMUSG00000049940	Pgrmc2	0.972372005	0.573846202	1078	775	0.176	0.139	-0.760741205	7.78E-08	0.002371182	down
FB_Cluster_0	ENSMUSG00000029657	Hsph1	0.561108034	0.262393783	1078	775	0.11	0.071	-1.09625241	8.55E-08	0.002605645	down
FB_Cluster_0	ENSMUSG00000051391	Ywhag	0.672906826	0.471585479	1078	775	0.126	0.123	-0.512795948	8.76E-08	0.002668687	down
FB_Cluster_0	ENSMUSG00000079659	Tmem243	0.94381415	1.272678171	1078	775	0.17	0.258	0.431253442	8.78E-08	0.002674539	up
FB_Cluster_0	ENSMUSG00000045817	Zfp36l2	0.723039503	0.99511069	1078	775	0.139	0.219	0.460727993	8.84E-08	0.002693516	up
FB_Cluster_0	ENSMUSG00000054072	Iigp1	0.292480732	0.688324122	1078	775	0.052	0.125	1.234462888	9.03E-08	0.00275198	up
FB_Cluster_0	ENSMUSG00000040560	Wdr7	0.515681093	0.726766959	1078	775	0.105	0.174	0.494932439	9.37E-08	0.002855336	up
FB_Cluster_0	ENSMUSG00000117924	Tmem223	0.938122827	0.533440996	1078	775	0.167	0.125	-0.814331472	9.40E-08	0.002865656	down
FB_Cluster_0	ENSMUSG00000018102	H2bc4	0.757060524	0.428962104	1078	775	0.135	0.106	-0.819412711	9.46E-08	0.0028825	down
FB_Cluster_0	ENSMUSG00000026637	Traf5	0.45333929	0.630737477	1078	775	0.09	0.152	0.476358964	9.51E-08	0.002899618	up
FB_Cluster_0	ENSMUSG00000027984	Hadh	1.204412044	0.855380263	1078	775	0.208	0.186	-0.493642344	9.58E-08	0.002919444	down
FB_Cluster_0	ENSMUSG00000026803	Ttf1	0.359830646	0.483488283	1078	775	0.07	0.121	0.426060346	9.58E-08	0.002920644	up
FB_Cluster_0	ENSMUSG00000117328	4930474M22Rik	0.215566521	0.406605746	1078	775	0.045	0.103	0.915183135	9.61E-08	0.002929795	up
FB_Cluster_0	ENSMUSG00000028416	Bag1	0.85054763	0.435112089	1078	775	0.154	0.106	-0.966843006	9.62E-08	0.002932921	down
FB_Cluster_0	ENSMUSG00000032353	Tmed3	1.880444464	1.445464261	1078	775	0.32	0.303	-0.379517674	9.64E-08	0.002938265	down
FB_Cluster_0	ENSMUSG00000028060	Khdc4	0.65940875	0.851106651	1078	775	0.131	0.2	0.368117623	9.66E-08	0.002944042	up
FB_Cluster_0	ENSMUSG00000025925	Terf1	0.575340805	0.756982971	1078	775	0.108	0.172	0.395783892	9.91E-08	0.003019889	up
FB_Cluster_0	ENSMUSG00000027230	Creb3l1	0.793415644	0.549710043	1078	775	0.153	0.138	-0.529325407	1.00E-07	0.003058545	down
FB_Cluster_0	ENSMUSG00000032458	Copb2	0.898745289	0.609020304	1078	775	0.173	0.151	-0.561345623	1.00E-07	0.003062811	down
FB_Cluster_0	ENSMUSG00000030421	Uri1	0.476998066	0.680009136	1078	775	0.099	0.166	0.511480435	1.03E-07	0.003146351	up
FB_Cluster_0	ENSMUSG00000032180	Tmed1	0.636294223	0.456850671	1078	775	0.123	0.119	-0.477882309	1.04E-07	0.00316126	down
FB_Cluster_0	ENSMUSG00000030314	Atg7	0.321230547	0.416675618	1078	775	0.063	0.111	0.375212743	1.04E-07	0.003177784	up
FB_Cluster_0	ENSMUSG00000020721	Helz	0.598146377	0.890101296	1078	775	0.119	0.199	0.573391848	1.05E-07	0.003206753	up
FB_Cluster_0	ENSMUSG00000058013	Septin11	2.043371206	2.647006561	1078	775	0.33	0.446	0.373394358	1.09E-07	0.003317505	up
FB_Cluster_0	ENSMUSG00000020696	Rffl	0.318642512	0.438497717	1078	775	0.059	0.108	0.460506854	1.09E-07	0.003331129	up
FB_Cluster_0	ENSMUSG00000037940	Inpp4b	0.436598511	0.622755852	1078	775	0.069	0.129	0.512260705	1.11E-07	0.003371148	up
FB_Cluster_0	ENSMUSG00000042628	Zfyve1	0.24152904	0.423501493	1078	775	0.052	0.111	0.809913821	1.11E-07	0.003392645	up
FB_Cluster_0	ENSMUSG00000021963	Sap18	0.575959436	0.365297661	1078	775	0.109	0.095	-0.656750276	1.15E-07	0.003495376	down
FB_Cluster_0	ENSMUSG00000027479	Mapre1	0.593547332	0.434485828	1078	775	0.112	0.114	-0.449964996	1.16E-07	0.003539523	down
FB_Cluster_0	ENSMUSG00000026179	Pnkd	0.628207306	0.418898209	1078	775	0.116	0.106	-0.584526277	1.16E-07	0.003545388	down
FB_Cluster_0	ENSMUSG00000066894	Vsig10	0.300520864	0.467566245	1078	775	0.058	0.115	0.63753416	1.19E-07	0.003611803	up
FB_Cluster_0	ENSMUSG00000022437	Samm50	0.580662512	0.307021302	1078	775	0.109	0.079	-0.919139748	1.20E-07	0.00365548	down
FB_Cluster_0	ENSMUSG00000036093	Arl5a	0.480233305	0.753020973	1078	775	0.099	0.177	0.648845778	1.21E-07	0.003687046	up
FB_Cluster_0	ENSMUSG00000002102	Psmc3	0.839909142	0.602324863	1078	775	0.154	0.146	-0.479623715	1.22E-07	0.003715442	down
FB_Cluster_0	ENSMUSG00000022771	Ppil2	0.307144112	0.511942369	1078	775	0.062	0.125	0.736877826	1.23E-07	0.003736795	up
FB_Cluster_0	ENSMUSG00000069744	Psmb3	0.610556676	0.384138974	1078	775	0.122	0.105	-0.668357632	1.25E-07	0.003801295	down
FB_Cluster_0	ENSMUSG00000040029	Ipo8	0.439342804	0.715423604	1078	775	0.087	0.163	0.703323956	1.25E-07	0.00382104	up
FB_Cluster_0	ENSMUSG00000055817	Mta3	0.654781513	0.844057055	1078	775	0.125	0.194	0.366277531	1.26E-07	0.003843898	up
FB_Cluster_0	ENSMUSG00000032112	Trappc4	0.547627176	0.397518657	1078	775	0.106	0.103	-0.462072011	1.28E-07	0.003903692	down
FB_Cluster_0	ENSMUSG00000030643	Rab30	0.283079533	0.434211161	1078	775	0.056	0.111	0.61701203	1.29E-07	0.003924208	up
FB_Cluster_0	ENSMUSG00000025245	Lztfl1	0.546476988	0.828972367	1078	775	0.105	0.183	0.601073315	1.29E-07	0.003944049	up
FB_Cluster_0	ENSMUSG00000030068	Gm20696	0.465748854	0.614009512	1078	775	0.089	0.145	0.398634005	1.33E-07	0.004045006	up
FB_Cluster_0	ENSMUSG00000028073	Pear1	0.52560794	0.707729362	1078	775	0.112	0.177	0.429140085	1.36E-07	0.004131999	up
FB_Cluster_0	ENSMUSG00000038383	Pigu	0.335744889	0.494430004	1078	775	0.066	0.121	0.558262983	1.37E-07	0.004168152	up
FB_Cluster_0	ENSMUSG00000006941	Eif1b	0.61401583	0.388306695	1078	775	0.115	0.097	-0.660942722	1.43E-07	0.004363715	down
FB_Cluster_0	ENSMUSG00000091165	Gm17036	0.270219891	0.385044168	1078	775	0.054	0.102	0.510730908	1.49E-07	0.004535724	up
FB_Cluster_0	ENSMUSG00000047767	Atg16l2	0.757818155	1.039176616	1078	775	0.147	0.23	0.455465726	1.49E-07	0.004535867	up
FB_Cluster_0	ENSMUSG00000085234	Gm15614	0.290298679	0.540093642	1078	775	0.053	0.115	0.895441771	1.49E-07	0.004539141	up
FB_Cluster_0	ENSMUSG00000029918	Mrps33	0.738482902	0.536609846	1078	775	0.122	0.128	-0.460617512	1.50E-07	0.004564496	down
FB_Cluster_0	ENSMUSG00000019979	Apaf1	0.534365525	0.782343976	1078	775	0.109	0.182	0.549890564	1.51E-07	0.004613539	up
FB_Cluster_0	ENSMUSG00000028233	Tgs1	0.333325762	0.485094326	1078	775	0.066	0.124	0.541197099	1.55E-07	0.004737088	up
FB_Cluster_0	ENSMUSG00000051185	Fam174a	0.57614361	0.427376767	1078	775	0.108	0.114	-0.430832837	1.58E-07	0.004830363	down
FB_Cluster_0	ENSMUSG00000062580	Timm17a	0.78189503	0.604740992	1078	775	0.147	0.146	-0.370603519	1.59E-07	0.004846316	down
FB_Cluster_0	ENSMUSG00000024789	Jak2	0.698516952	1.040331848	1078	775	0.14	0.23	0.574608912	1.60E-07	0.004888926	up
FB_Cluster_0	ENSMUSG00000006678	Pola1	0.508166582	0.717108907	1078	775	0.096	0.161	0.496808026	1.61E-07	0.004915656	up
FB_Cluster_0	ENSMUSG00000006010	Odr4	0.445271591	0.597366214	1078	775	0.094	0.152	0.423847597	1.63E-07	0.004970387	up
FB_Cluster_0	ENSMUSG00000031698	Mylk3	0.601860325	0.28541731	1078	775	0.112	0.075	-1.076090186	1.63E-07	0.004975322	down
FB_Cluster_0	ENSMUSG00000020319	Wdpcp	0.990081735	1.323752147	1078	775	0.167	0.254	0.418976763	1.68E-07	0.005110801	up
FB_Cluster_0	ENSMUSG00000033453	Adamts15	0.681895656	0.356011486	1078	775	0.118	0.089	-0.937433582	1.72E-07	0.005256712	down
FB_Cluster_0	ENSMUSG00000030583	Sipa1l3	0.309982848	0.464395734	1078	775	0.062	0.116	0.583011622	1.81E-07	0.005525331	up
FB_Cluster_0	ENSMUSG00000020463	Ppp4r3b	0.784785408	1.143937501	1078	775	0.153	0.243	0.543580401	1.84E-07	0.005593966	up
FB_Cluster_0	ENSMUSG00000020029	Nudt4	0.56425699	0.410717783	1078	775	0.11	0.108	-0.45810941	1.84E-07	0.005612061	down
FB_Cluster_0	ENSMUSG00000032301	Psma4	0.645229453	0.429474762	1078	775	0.127	0.111	-0.587126634	1.84E-07	0.00562135	down
FB_Cluster_0	ENSMUSG00000014426	Map3k4	0.386594491	0.522473661	1078	775	0.076	0.129	0.4344402	1.90E-07	0.005804206	up
FB_Cluster_0	ENSMUSG00000019039	Dalrd3	0.30460663	0.419692951	1078	775	0.058	0.102	0.462257051	1.97E-07	0.005997909	up
FB_Cluster_0	ENSMUSG00000025583	Rptor	0.66440475	0.913990733	1078	775	0.133	0.21	0.460057863	1.97E-07	0.006008138	up
FB_Cluster_0	ENSMUSG00000041057	Wdr43	0.425914252	0.672605125	1078	775	0.089	0.161	0.659072554	1.98E-07	0.006024807	up
FB_Cluster_0	ENSMUSG00000022855	Senp2	0.545848626	0.424130633	1078	775	0.107	0.112	-0.363916403	2.03E-07	0.006176327	down
FB_Cluster_0	ENSMUSG00000021775	Nr1d2	0.489012115	0.717042969	1078	775	0.1	0.172	0.552095563	2.04E-07	0.006220987	up
FB_Cluster_0	ENSMUSG00000063236	1110038F14Rik	0.495862527	0.375945961	1078	775	0.095	0.101	-0.399322119	2.06E-07	0.006282362	down
FB_Cluster_0	ENSMUSG00000029009	Mthfr	0.270104519	0.428774349	1078	775	0.052	0.103	0.666503228	2.06E-07	0.006286939	up
FB_Cluster_0	ENSMUSG00000024248	Cox7a2l	1.169583783	0.882108117	1078	775	0.212	0.201	-0.406927618	2.06E-07	0.006289367	down
FB_Cluster_0	ENSMUSG00000024084	Qpct	1.076183782	0.789610765	1078	775	0.187	0.181	-0.44666226	2.10E-07	0.006412685	down
FB_Cluster_0	ENSMUSG00000059669	Taf1b	0.312968663	0.577240088	1078	775	0.061	0.129	0.882942296	2.13E-07	0.006480172	up
FB_Cluster_0	ENSMUSG00000009549	Srp14	0.762266907	0.455429943	1078	775	0.144	0.114	-0.742939607	2.15E-07	0.006562185	down
FB_Cluster_0	ENSMUSG00000029173	Sepsecs	0.217126726	0.398509289	1078	775	0.047	0.105	0.875773718	2.31E-07	0.007046025	up
FB_Cluster_0	ENSMUSG00000021785	Ngly1	0.531701803	0.753031766	1078	775	0.104	0.172	0.502013629	2.33E-07	0.007099462	up
FB_Cluster_0	ENSMUSG00000045594	Glb1	0.404314631	0.58148842	1078	775	0.08	0.141	0.52416335	2.33E-07	0.007109386	up
FB_Cluster_0	ENSMUSG00000028470	Hint2	0.690065904	0.353507835	1078	775	0.123	0.089	-0.964792961	2.36E-07	0.007188842	down
FB_Cluster_0	ENSMUSG00000028830	AU040320	0.505105256	0.650321765	1078	775	0.1	0.157	0.364505886	2.50E-07	0.007634655	up
FB_Cluster_0	ENSMUSG00000043987	Cep164	0.36276294	0.482512322	1078	775	0.071	0.124	0.41144003	2.52E-07	0.007671828	up
FB_Cluster_0	ENSMUSG00000021905	Dph3	0.614630297	0.385656219	1078	775	0.119	0.101	-0.672264173	2.55E-07	0.007760045	down
FB_Cluster_0	ENSMUSG00000053470	Kdm3a	0.582139873	0.810125861	1078	775	0.114	0.186	0.476710493	2.57E-07	0.007820009	up
FB_Cluster_0	ENSMUSG00000022427	Tomm22	0.611955477	0.31570243	1078	775	0.118	0.08	-0.954640154	2.57E-07	0.007830144	down
FB_Cluster_0	ENSMUSG00000047735	Samd9l	0.451646648	0.678530547	1078	775	0.085	0.152	0.587112473	2.58E-07	0.007873719	up
FB_Cluster_0	ENSMUSG00000058833	Rex1bd	0.645548687	0.349231824	1078	775	0.122	0.09	-0.886151295	2.60E-07	0.007915994	down
FB_Cluster_0	ENSMUSG00000048546	Tob2	0.529727043	0.361707721	1078	775	0.103	0.097	-0.550298288	2.61E-07	0.007950832	down
FB_Cluster_0	ENSMUSG00000031168	Ebp	0.578218551	0.377055651	1078	775	0.109	0.098	-0.616704341	2.63E-07	0.008003803	down
FB_Cluster_0	ENSMUSG00000029430	Ran	0.575426805	0.317271148	1078	775	0.111	0.084	-0.858712145	2.71E-07	0.008247993	down
FB_Cluster_0	ENSMUSG00000071655	Ubxn1	0.725074229	0.430430854	1078	775	0.134	0.11	-0.752211023	2.74E-07	0.00833988	down
FB_Cluster_0	ENSMUSG00000023805	Synj2	0.293637799	0.401464164	1078	775	0.062	0.108	0.451101601	2.76E-07	0.008422146	up
FB_Cluster_0	ENSMUSG00000029649	Pomp	0.849262373	0.510452784	1078	775	0.163	0.124	-0.734320076	2.77E-07	0.008441049	down
FB_Cluster_0	ENSMUSG00000019210	Atp6v1e1	0.654165265	0.440259998	1078	775	0.118	0.11	-0.571192257	2.87E-07	0.008754765	down
FB_Cluster_0	ENSMUSG00000014226	Cacybp	0.617213603	0.319118821	1078	775	0.111	0.083	-0.951457868	2.89E-07	0.008812617	down
FB_Cluster_0	ENSMUSG00000020774	Aspa	1.271551522	1.82896118	1078	775	0.216	0.323	0.524399958	2.90E-07	0.008825367	up
FB_Cluster_0	ENSMUSG00000031029	Eif3f	0.72742659	0.519090754	1078	775	0.141	0.129	-0.486735288	2.91E-07	0.008867512	down
FB_Cluster_0	ENSMUSG00000005198	Polr2a	0.335633563	0.435826778	1078	775	0.066	0.111	0.376769056	2.98E-07	0.009070069	up
FB_Cluster_0	ENSMUSG00000087290	Gm15866	0.789917418	1.106624612	1078	775	0.14	0.221	0.486339912	3.12E-07	0.009516319	up
FB_Cluster_0	ENSMUSG00000040717	Il17rd	0.324421007	0.512727645	1078	775	0.067	0.126	0.660162162	3.13E-07	0.009529215	up
FB_Cluster_0	ENSMUSG00000007739	Cct4	0.742293869	0.528555016	1078	775	0.144	0.133	-0.489858225	3.13E-07	0.009550352	down
FB_Cluster_0	ENSMUSG00000031119	Gpc4	0.455472579	0.610022453	1078	775	0.087	0.145	0.421417912	3.16E-07	0.009623329	up
FB_Cluster_0	ENSMUSG00000033020	Polr2f	0.614156374	0.384056709	1078	775	0.114	0.099	-0.677145974	3.16E-07	0.009642085	down
FB_Cluster_0	ENSMUSG00000042312	S100a13	0.687172998	0.486128434	1078	775	0.122	0.117	-0.499249016	3.17E-07	0.009647439	down
FB_Cluster_0	ENSMUSG00000041765	Ubac2	0.54781851	0.796757371	1078	775	0.109	0.182	0.540360177	3.19E-07	0.009732872	up
FB_Cluster_0	ENSMUSG00000019362	D8Ertd738e	0.919615222	0.659377064	1078	775	0.159	0.148	-0.479864733	3.28E-07	0.009998085	down
FB_Cluster_0	ENSMUSG00000021147	Wdr37	0.374030323	0.486174394	1078	775	0.081	0.132	0.378229726	3.31E-07	0.010085712	up
FB_Cluster_0	ENSMUSG00000004896	Rrnad1	0.405220554	0.555601141	1078	775	0.08	0.135	0.455245864	3.43E-07	0.010439274	up
FB_Cluster_0	ENSMUSG00000030064	Frmd4b	0.877245608	1.172262465	1078	775	0.15	0.227	0.418201511	3.44E-07	0.010489497	up
FB_Cluster_0	ENSMUSG00000068923	Syt11	0.375513259	0.501207197	1078	775	0.074	0.125	0.416446958	3.49E-07	0.010623217	up
FB_Cluster_0	ENSMUSG00000073155	1810058I24Rik	0.748772823	0.47845289	1078	775	0.137	0.12	-0.646042355	3.50E-07	0.010675486	down
FB_Cluster_0	ENSMUSG00000001123	Lgals9	0.248691676	0.41191777	1078	775	0.049	0.101	0.727768343	3.54E-07	0.010802443	up
FB_Cluster_0	ENSMUSG00000032399	Rpl4	1.426936599	1.037025105	1078	775	0.255	0.23	-0.460432403	3.55E-07	0.010828946	down
FB_Cluster_0	ENSMUSG00000037772	Mrpl23	0.684730528	0.519300519	1078	775	0.126	0.128	-0.39889956	3.57E-07	0.010886933	down
FB_Cluster_0	ENSMUSG00000022508	Bcl6	0.670439077	0.879483902	1078	775	0.129	0.2	0.391499791	3.63E-07	0.011058006	up
FB_Cluster_0	ENSMUSG00000024208	Uqcc2	0.960619114	0.611716733	1078	775	0.174	0.142	-0.651015127	3.64E-07	0.011090778	down
FB_Cluster_0	ENSMUSG00000040385	Ppp1ca	0.643667683	0.468084193	1078	775	0.121	0.12	-0.459463928	3.71E-07	0.011295799	down
FB_Cluster_0	ENSMUSG00000007783	Cpt1c	0.32778171	0.474175336	1078	775	0.066	0.119	0.532549418	3.72E-07	0.011327891	up
FB_Cluster_0	ENSMUSG00000036840	Siah1a	0.298278028	0.413263371	1078	775	0.061	0.108	0.470269253	3.74E-07	0.011407881	up
FB_Cluster_0	ENSMUSG00000037787	Apopt1	0.572756337	0.41532739	1078	775	0.101	0.11	-0.463577041	3.76E-07	0.011458305	down
FB_Cluster_0	ENSMUSG00000087361	0610043K17Rik	0.524122886	0.813868646	1078	775	0.103	0.179	0.634792884	3.90E-07	0.011899276	up
FB_Cluster_0	ENSMUSG00000068015	Lrch1	0.398251478	0.604821105	1078	775	0.083	0.147	0.602705065	4.04E-07	0.012315095	up
FB_Cluster_0	ENSMUSG00000026575	Nme7	0.303842393	0.422198923	1078	775	0.057	0.103	0.474466654	4.04E-07	0.012320858	up
FB_Cluster_0	ENSMUSG00000038822	Hace1	0.540787492	0.741065946	1078	775	0.109	0.175	0.454468061	4.11E-07	0.012521012	up
FB_Cluster_0	ENSMUSG00000054737	Zfp182	0.826837934	1.160229072	1078	775	0.151	0.239	0.488683059	4.21E-07	0.01283537	up
FB_Cluster_0	ENSMUSG00000047793	Sned1	0.577521948	0.826651846	1078	775	0.1	0.168	0.5173288	4.26E-07	0.012991212	up
FB_Cluster_0	ENSMUSG00000036781	Rps27l	0.620720972	0.472653629	1078	775	0.115	0.119	-0.393088762	4.29E-07	0.013071989	down
FB_Cluster_0	ENSMUSG00000101674	4930444A19Rik	0.386965989	0.60640814	1078	775	0.066	0.126	0.647947463	4.29E-07	0.013082148	up
FB_Cluster_0	ENSMUSG00000019989	Enpp3	0.309442311	0.455486021	1078	775	0.06	0.112	0.557586856	4.40E-07	0.013424645	up
FB_Cluster_0	ENSMUSG00000024317	Rnf138	0.422999901	0.686568938	1078	775	0.086	0.159	0.698616356	4.48E-07	0.013663276	up
FB_Cluster_0	ENSMUSG00000059436	Max	0.477133545	0.637691907	1078	775	0.094	0.155	0.418390336	4.51E-07	0.013732365	up
FB_Cluster_0	ENSMUSG00000030850	Ate1	0.625737467	0.463801407	1078	775	0.118	0.119	-0.43196981	4.54E-07	0.013823494	down
FB_Cluster_0	ENSMUSG00000027605	Acss2	0.347295067	0.460282478	1078	775	0.069	0.117	0.406255658	4.55E-07	0.013857948	up
FB_Cluster_0	ENSMUSG00000021712	Trim23	0.32953456	0.462846276	1078	775	0.06	0.112	0.489977272	4.67E-07	0.014221924	up
FB_Cluster_0	ENSMUSG00000022193	Psmb5	0.772058109	0.582274693	1078	775	0.14	0.137	-0.406948622	4.76E-07	0.014520102	down
FB_Cluster_0	ENSMUSG00000031133	Arhgef6	0.563768216	0.767224961	1078	775	0.113	0.181	0.444479664	4.89E-07	0.014912075	up
FB_Cluster_0	ENSMUSG00000034341	Wbp2	0.31597446	0.425687264	1078	775	0.064	0.112	0.429868333	4.91E-07	0.014966155	up
FB_Cluster_0	ENSMUSG00000021906	Oxnad1	0.557937375	0.308614251	1078	775	0.103	0.081	-0.85408967	4.94E-07	0.015047544	down
FB_Cluster_0	ENSMUSG00000042436	Mfap4	0.755626196	1.245773192	1078	775	0.105	0.188	0.721221697	5.04E-07	0.015366416	up
FB_Cluster_0	ENSMUSG00000032409	Atr	0.565219587	0.788116482	1078	775	0.109	0.178	0.479525234	5.08E-07	0.015480225	up
FB_Cluster_0	ENSMUSG00000016427	Ndufa1	2.003382867	1.542668726	1078	775	0.328	0.307	-0.376988366	5.08E-07	0.015485372	down
FB_Cluster_0	ENSMUSG00000002325	Irf9	0.256950431	0.453109055	1078	775	0.048	0.105	0.818125253	5.33E-07	0.016251628	up
FB_Cluster_0	ENSMUSG00000102692	Dchs2	0.58309006	0.789568395	1078	775	0.096	0.16	0.43728082	5.34E-07	0.016261911	up
FB_Cluster_0	ENSMUSG00000079038	D130040H23Rik	0.288119036	0.40282488	1078	775	0.059	0.105	0.48334527	5.38E-07	0.016382568	up
FB_Cluster_0	ENSMUSG00000047260	Emc6	0.614896839	0.331221328	1078	775	0.111	0.079	-0.892347917	5.71E-07	0.017413745	down
FB_Cluster_0	ENSMUSG00000031807	Pgls	0.556654238	0.429632732	1078	775	0.109	0.112	-0.373600966	5.75E-07	0.017512051	down
FB_Cluster_0	ENSMUSG00000032193	Ldlr	0.599966954	0.351209938	1078	775	0.109	0.089	-0.772379094	5.75E-07	0.017515691	down
FB_Cluster_0	ENSMUSG00000079658	Eloc	0.562435168	0.404307576	1078	775	0.099	0.101	-0.476133267	5.82E-07	0.017732346	down
FB_Cluster_0	ENSMUSG00000020677	Ddx52	0.333507572	0.435202438	1078	775	0.07	0.115	0.383866066	5.85E-07	0.017841751	up
FB_Cluster_0	ENSMUSG00000047414	Flrt2	0.320602377	0.454954814	1078	775	0.058	0.111	0.504805288	5.90E-07	0.017981992	up
FB_Cluster_0	ENSMUSG00000032279	Idh3a	0.701209828	0.485328302	1078	775	0.132	0.117	-0.530793721	5.91E-07	0.018016732	down
FB_Cluster_0	ENSMUSG00000040365	Trim41	0.270692727	0.411326551	1078	775	0.058	0.11	0.603445905	6.04E-07	0.018404446	up
FB_Cluster_0	ENSMUSG00000022401	Xpnpep3	0.320772001	0.470356545	1078	775	0.061	0.112	0.552063565	6.07E-07	0.018510971	up
FB_Cluster_0	ENSMUSG00000057329	Bcl2	1.646740356	2.13951987	1078	775	0.263	0.363	0.377653799	6.08E-07	0.01853822	up
FB_Cluster_0	ENSMUSG00000027022	Xirp2	1.216920615	0.672717947	1078	775	0.201	0.138	-0.855065511	6.19E-07	0.018856261	down
FB_Cluster_0	ENSMUSG00000025262	Fam120c	0.363456107	0.551023364	1078	775	0.071	0.132	0.60019726	6.19E-07	0.018871343	up
FB_Cluster_0	ENSMUSG00000000171	Sdhd	0.730444434	0.53894028	1078	775	0.135	0.13	-0.438578942	6.30E-07	0.019197506	down
FB_Cluster_0	ENSMUSG00000047459	Dynlrb1	0.596901628	0.423683798	1078	775	0.113	0.11	-0.494406432	6.32E-07	0.019266613	down
FB_Cluster_0	ENSMUSG00000042105	Inpp5f	0.313417518	0.501590135	1078	775	0.068	0.128	0.678250513	6.41E-07	0.019549594	up
FB_Cluster_0	ENSMUSG00000086282	Sox5os4	1.024060497	1.381978535	1078	775	0.168	0.254	0.432397778	6.63E-07	0.020195101	up
FB_Cluster_0	ENSMUSG00000030894	Tpp1	0.369622662	0.490972538	1078	775	0.076	0.125	0.409492671	6.81E-07	0.020765278	up
FB_Cluster_0	ENSMUSG00000022701	Ccdc191	0.446731244	0.671971562	1078	775	0.083	0.145	0.588884791	6.97E-07	0.021246928	up
FB_Cluster_0	ENSMUSG00000028469	Npr2	0.440265562	0.647614374	1078	775	0.09	0.154	0.55665611	7.19E-07	0.021910452	up
FB_Cluster_0	ENSMUSG00000040591	1110051M20Rik	0.809936649	1.267798971	1078	775	0.149	0.243	0.646380706	7.20E-07	0.021934041	up
FB_Cluster_0	ENSMUSG00000001604	Tcea3	0.560401961	0.304108659	1078	775	0.106	0.077	-0.881658203	7.31E-07	0.022279574	down
FB_Cluster_0	ENSMUSG00000045573	Penk	3.324927171	2.336604239	1078	775	0.419	0.357	-0.508890989	7.53E-07	0.022954424	down
FB_Cluster_0	ENSMUSG00000031154	Otud5	0.289534508	0.440084071	1078	775	0.059	0.111	0.603873436	7.62E-07	0.023216879	up
FB_Cluster_0	ENSMUSG00000036339	Tmem260	0.515725914	0.721432349	1078	775	0.104	0.169	0.484179825	7.64E-07	0.023271269	up
FB_Cluster_0	ENSMUSG00000029676	Pot1a	0.292997131	0.434738324	1078	775	0.057	0.107	0.569100251	7.64E-07	0.023287202	up
FB_Cluster_0	ENSMUSG00000038344	Txlng	0.517073613	0.741146254	1078	775	0.105	0.173	0.519304242	7.66E-07	0.023346422	up
FB_Cluster_0	ENSMUSG00000090084	Srpx	0.590342533	0.759298999	1078	775	0.106	0.165	0.363061446	7.77E-07	0.023680646	up
FB_Cluster_0	ENSMUSG00000018651	Tada2a	0.287039411	0.376236326	1078	775	0.057	0.101	0.390271191	7.80E-07	0.023770908	up
FB_Cluster_0	ENSMUSG00000067942	Zfp160	0.388288298	0.540944517	1078	775	0.08	0.134	0.47824757	7.95E-07	0.02421653	up
FB_Cluster_0	ENSMUSG00000020091	Eif4ebp2	0.470259923	0.638815474	1078	775	0.096	0.154	0.441859941	7.98E-07	0.024329507	up
FB_Cluster_0	ENSMUSG00000031278	Acsl4	0.442572537	0.640833663	1078	775	0.094	0.159	0.533935173	7.99E-07	0.024349457	up
FB_Cluster_0	ENSMUSG00000031548	Sfrp1	2.549510499	3.379299671	1078	775	0.366	0.486	0.406490119	8.01E-07	0.024406637	up
FB_Cluster_0	ENSMUSG00000042507	Elmsan1	0.455871424	0.660732107	1078	775	0.09	0.152	0.535340369	8.03E-07	0.024474234	up
FB_Cluster_0	ENSMUSG00000029442	Wdr66	0.495488489	0.727338779	1078	775	0.091	0.157	0.553683158	8.27E-07	0.02521829	up
FB_Cluster_0	ENSMUSG00000028261	Ndufaf4	0.605766127	0.433496747	1078	775	0.112	0.11	-0.482645116	8.29E-07	0.025252529	down
FB_Cluster_0	ENSMUSG00000032009	Sesn3	0.620561726	0.853772475	1078	775	0.11	0.178	0.460213439	8.33E-07	0.025375454	up
FB_Cluster_0	ENSMUSG00000060450	Rnf14	0.517255843	0.693744019	1078	775	0.104	0.164	0.423454449	8.35E-07	0.025458266	up
FB_Cluster_0	ENSMUSG00000061887	Ssbp3	0.401592876	0.516542795	1078	775	0.085	0.135	0.363074274	8.35E-07	0.025463442	up
FB_Cluster_0	ENSMUSG00000020412	Ascc2	0.289017139	0.443978988	1078	775	0.058	0.11	0.619162178	8.43E-07	0.025696926	up
FB_Cluster_0	ENSMUSG00000040253	Gbp7	0.24892124	0.456012869	1078	775	0.053	0.114	0.873122078	8.44E-07	0.025734295	up
FB_Cluster_0	ENSMUSG00000001270	Ckb	0.550040521	0.380385583	1078	775	0.105	0.099	-0.531958381	8.59E-07	0.026174624	down
FB_Cluster_0	ENSMUSG00000042496	Prdm10	0.381955747	0.555774442	1078	775	0.072	0.129	0.540975892	8.60E-07	0.026219995	up
FB_Cluster_0	ENSMUSG00000023088	Abcc1	0.538587462	0.742124217	1078	775	0.109	0.175	0.462406585	8.74E-07	0.026641595	up
FB_Cluster_0	ENSMUSG00000015291	Gdi1	0.4627011	0.359584548	1078	775	0.096	0.101	-0.363660111	8.89E-07	0.027090131	down
FB_Cluster_0	ENSMUSG00000063656	Gm10135	0.470664264	0.61914668	1078	775	0.085	0.139	0.39550942	8.89E-07	0.027096804	up
FB_Cluster_0	ENSMUSG00000020181	Nav3	0.346435196	0.46394655	1078	775	0.061	0.107	0.421267646	9.01E-07	0.027473168	up
FB_Cluster_0	ENSMUSG00000037949	Ano10	0.372871025	0.515909178	1078	775	0.071	0.125	0.468333172	9.03E-07	0.027511298	up
FB_Cluster_0	ENSMUSG00000039199	Zdhhc1	0.337799476	0.465602199	1078	775	0.072	0.121	0.46281358	9.06E-07	0.027603463	up
FB_Cluster_0	ENSMUSG00000020166	Cnot2	0.867449115	1.145228193	1078	775	0.171	0.25	0.400743719	9.36E-07	0.028531611	up
FB_Cluster_0	ENSMUSG00000019782	Rwdd1	0.63379599	0.457443821	1078	775	0.121	0.117	-0.47033622	9.39E-07	0.028608737	down
FB_Cluster_0	ENSMUSG00000037902	Sirpa	0.443025038	0.569889916	1078	775	0.088	0.141	0.36322255	9.52E-07	0.029001916	up
FB_Cluster_0	ENSMUSG00000039062	Anpep	0.537566235	0.733949131	1078	775	0.105	0.168	0.449165754	9.68E-07	0.029503769	up
FB_Cluster_0	ENSMUSG00000068917	Clk2	0.476118921	0.363454643	1078	775	0.097	0.101	-0.389452723	9.69E-07	0.029541214	down
FB_Cluster_0	ENSMUSG00000033111	3830406C13Rik	0.314164808	0.430225256	1078	775	0.062	0.108	0.453446792	9.73E-07	0.029641034	up
FB_Cluster_0	ENSMUSG00000032177	Pde4a	0.34842066	0.498038781	1078	775	0.071	0.124	0.515303552	9.86E-07	0.030049935	up
FB_Cluster_0	ENSMUSG00000008398	Elk3	0.433626403	0.589880247	1078	775	0.087	0.143	0.443881382	9.98E-07	0.03040994	up
FB_Cluster_0	ENSMUSG00000000804	Usp32	0.776245928	1.129185946	1078	775	0.151	0.236	0.540639292	1.01E-06	0.030765776	up
FB_Cluster_0	ENSMUSG00000039230	Tbcd	0.371488134	0.506702453	1078	775	0.071	0.121	0.447719075	1.04E-06	0.031686479	up
FB_Cluster_0	ENSMUSG00000042726	Trafd1	0.38613759	0.545603858	1078	775	0.08	0.134	0.498629664	1.05E-06	0.032103086	up
FB_Cluster_0	ENSMUSG00000031537	Ikbkb	0.366626411	0.527470139	1078	775	0.079	0.135	0.524658737	1.09E-06	0.033238487	up
FB_Cluster_0	ENSMUSG00000021514	Zfp369	0.273245006	0.362103249	1078	775	0.062	0.103	0.406076471	1.10E-06	0.033488511	up
FB_Cluster_0	ENSMUSG00000037355	Uvssa	0.30166225	0.394805339	1078	775	0.061	0.102	0.388094535	1.10E-06	0.033581153	up
FB_Cluster_0	ENSMUSG00000033502	Cdc14a	0.351961965	0.552535044	1078	775	0.07	0.126	0.650497677	1.15E-06	0.035011978	up
FB_Cluster_0	ENSMUSG00000027550	Lrrcc1	0.283272614	0.4318178	1078	775	0.057	0.107	0.608056435	1.17E-06	0.035778649	up
FB_Cluster_0	ENSMUSG00000022803	Popdc2	0.655520665	0.45310974	1078	775	0.123	0.114	-0.532682463	1.18E-06	0.036011453	down
FB_Cluster_0	ENSMUSG00000063458	Lrmda	1.466945158	2.107501377	1078	775	0.192	0.29	0.522688747	1.18E-06	0.036076148	up
FB_Cluster_0	ENSMUSG00000032549	Rab6b	0.311753483	0.413185667	1078	775	0.066	0.111	0.406270958	1.20E-06	0.03660756	up
FB_Cluster_0	ENSMUSG00000041548	Hspb8	0.547238169	0.272731376	1078	775	0.103	0.07	-1.004422903	1.21E-06	0.036947941	down
FB_Cluster_0	ENSMUSG00000018585	Atox1	0.600882527	0.429062456	1078	775	0.115	0.112	-0.485799175	1.26E-06	0.038525278	down
FB_Cluster_0	ENSMUSG00000037405	Icam1	0.303101732	0.533945242	1078	775	0.062	0.125	0.816683973	1.27E-06	0.03879179	up
FB_Cluster_0	ENSMUSG00000000594	Gm2a	0.730881938	0.565263203	1078	775	0.138	0.141	-0.370657771	1.28E-06	0.038888786	down
FB_Cluster_0	ENSMUSG00000026339	Ccdc93	0.257036668	0.392033124	1078	775	0.053	0.102	0.608808158	1.29E-06	0.039452426	up
FB_Cluster_0	ENSMUSG00000020034	Tcp11l2	0.416448887	0.735131635	1078	775	0.092	0.17	0.81971302	1.34E-06	0.040702031	up
FB_Cluster_0	ENSMUSG00000021819	Zswim8	0.358888913	0.470488905	1078	775	0.077	0.125	0.390528018	1.35E-06	0.041182075	up
FB_Cluster_0	ENSMUSG00000019689	Fmc1	0.822664696	0.549726812	1078	775	0.156	0.13	-0.581502629	1.36E-06	0.04135014	down
FB_Cluster_0	ENSMUSG00000051234	Rnf7	0.687960229	0.408488688	1078	775	0.128	0.101	-0.751885592	1.41E-06	0.04298707	down
FB_Cluster_0	ENSMUSG00000040928	S100pbp	0.4241217	0.563109726	1078	775	0.083	0.134	0.408853828	1.42E-06	0.043192564	up
FB_Cluster_0	ENSMUSG00000026918	Brd3	0.493481537	0.638961249	1078	775	0.101	0.156	0.372665778	1.42E-06	0.043204911	up
FB_Cluster_0	ENSMUSG00000058267	Mrps14	0.901989623	0.53843081	1078	775	0.17	0.117	-0.744241887	1.43E-06	0.043570632	down
FB_Cluster_0	ENSMUSG00000030868	Dctn5	0.334936064	0.472808975	1078	775	0.07	0.119	0.497246126	1.45E-06	0.044127755	up
FB_Cluster_0	ENSMUSG00000022723	Crybg3	0.791483495	1.042133911	1078	775	0.152	0.225	0.396865664	1.45E-06	0.044261073	up
FB_Cluster_0	ENSMUSG00000040883	Tmem205	0.698288134	0.435319353	1078	775	0.141	0.111	-0.681623513	1.45E-06	0.044330485	down
FB_Cluster_0	ENSMUSG00000020737	Jpt1	0.536809076	0.335719071	1078	775	0.103	0.086	-0.676993629	1.51E-06	0.045936446	down
FB_Cluster_0	ENSMUSG00000034601	2700049A03Rik	0.316757456	0.445489721	1078	775	0.059	0.105	0.49188199	1.58E-06	0.048212852	up
FB_Cluster_0	ENSMUSG00000021820	Camk2g	0.308118042	0.41659551	1078	775	0.06	0.106	0.43504224	1.61E-06	0.049184453	up
FB_Cluster_0	ENSMUSG00000033768	Nrxn2	0.490089162	0.676179982	1078	775	0.092	0.154	0.464282064	1.63E-06	0.049591571	up
FB_Cluster_0	ENSMUSG00000097431	Gm26782	0.378659772	0.500421895	1078	775	0.074	0.121	0.402150071	1.63E-06	0.049608097	up
FB_Cluster_0	ENSMUSG00000038388	Mpp6	0.704863965	0.485354196	1078	775	0.121	0.112	-0.538214334	1.67E-06	0.050863185	down
FB_Cluster_0	ENSMUSG00000040964	Arhgef10l	0.348467708	0.466019469	1078	775	0.071	0.119	0.419260853	1.69E-06	0.051548073	up
FB_Cluster_0	ENSMUSG00000035969	Rusc2	0.346555421	0.488115713	1078	775	0.074	0.125	0.494016408	1.75E-06	0.05336077	up
FB_Cluster_0	ENSMUSG00000031379	Pir	0.57299508	0.762010543	1078	775	0.104	0.164	0.411225762	1.77E-06	0.053815486	up
FB_Cluster_0	ENSMUSG00000047248	C2cd3	0.288581946	0.447178903	1078	775	0.057	0.108	0.631693826	1.79E-06	0.05449502	up
FB_Cluster_0	ENSMUSG00000022965	Ifngr2	0.603304567	0.465052897	1078	775	0.116	0.119	-0.375420605	1.83E-06	0.055915507	down
FB_Cluster_0	ENSMUSG00000036977	Anapc10	0.379623308	0.502310443	1078	775	0.075	0.123	0.403917898	1.89E-06	0.057706355	up
FB_Cluster_0	ENSMUSG00000039016	Timm8b	0.754359478	0.414913119	1078	775	0.134	0.094	-0.862286473	1.90E-06	0.057942072	down
FB_Cluster_0	ENSMUSG00000041135	Ripk2	0.385081711	0.525442203	1078	775	0.077	0.129	0.448267421	1.92E-06	0.058457453	up
FB_Cluster_0	ENSMUSG00000033054	Npat	0.242942657	0.427544353	1078	775	0.051	0.106	0.815201944	1.94E-06	0.059231862	up
FB_Cluster_0	ENSMUSG00000036986	Pml	0.255637142	0.490556467	1078	775	0.052	0.11	0.940051569	2.04E-06	0.062288464	up
FB_Cluster_0	ENSMUSG00000027244	Atg13	0.317574582	0.425953281	1078	775	0.066	0.112	0.4234842	2.06E-06	0.062828709	up
FB_Cluster_0	ENSMUSG00000028128	F3	1.258377475	0.913495162	1078	775	0.217	0.196	-0.462052478	2.09E-06	0.063813839	down
FB_Cluster_0	ENSMUSG00000001016	Ilf2	0.458261397	0.668705589	1078	775	0.095	0.16	0.545101359	2.15E-06	0.065564142	up
FB_Cluster_0	ENSMUSG00000025940	Tmem70	0.543795627	0.320585946	1078	775	0.107	0.084	-0.762168697	2.15E-06	0.065566774	down
FB_Cluster_0	ENSMUSG00000029012	Orc5	0.342388599	0.523550763	1078	775	0.067	0.121	0.612548995	2.22E-06	0.067769421	up
FB_Cluster_0	ENSMUSG00000024357	Sil1	0.560400384	0.774615762	1078	775	0.11	0.175	0.466951732	2.23E-06	0.06810073	up
FB_Cluster_0	ENSMUSG00000032743	D430042O09Rik	0.640631974	0.891397068	1078	775	0.124	0.195	0.476509067	2.34E-06	0.07146848	up
FB_Cluster_0	ENSMUSG00000028863	Meaf6	0.284296312	0.410737564	1078	775	0.056	0.102	0.53066534	2.35E-06	0.071735066	up
FB_Cluster_0	ENSMUSG00000079057	Cyp4v3	0.313394525	0.496731684	1078	775	0.066	0.124	0.66431693	2.46E-06	0.074917981	up
FB_Cluster_0	ENSMUSG00000022601	Zbtb11	0.606633712	0.454373392	1078	775	0.107	0.108	-0.416867644	2.49E-06	0.075938211	down
FB_Cluster_0	ENSMUSG00000051934	Spats2	0.422886658	0.623864362	1078	775	0.08	0.139	0.560851472	2.52E-06	0.07689392	up
FB_Cluster_0	ENSMUSG00000003363	Pld3	0.311628564	0.472875575	1078	775	0.069	0.123	0.601475326	2.55E-06	0.077804225	up
FB_Cluster_0	ENSMUSG00000036299	BC031181	0.855103389	0.599598272	1078	775	0.157	0.138	-0.512030755	2.68E-06	0.081601676	down
FB_Cluster_0	ENSMUSG00000037720	Tmem33	0.608224986	0.425599036	1078	775	0.12	0.108	-0.51500844	2.87E-06	0.087380788	down
FB_Cluster_0	ENSMUSG00000035629	Rubcn	0.349476615	0.500567973	1078	775	0.071	0.123	0.518245493	2.88E-06	0.087888531	up
FB_Cluster_0	ENSMUSG00000019054	Fis1	0.616351882	0.448751803	1078	775	0.119	0.111	-0.457749098	2.90E-06	0.088341597	down
FB_Cluster_0	ENSMUSG00000022013	Dnajc15	0.74408253	0.475178647	1078	775	0.138	0.115	-0.646882937	2.93E-06	0.089360587	down
FB_Cluster_0	ENSMUSG00000012114	Med15	0.46753311	0.604207506	1078	775	0.096	0.147	0.369905779	3.04E-06	0.092575364	up
FB_Cluster_0	ENSMUSG00000031556	Tm2d2	1.078718876	0.753706484	1078	775	0.209	0.178	-0.517186559	3.05E-06	0.093089097	down
FB_Cluster_0	ENSMUSG00000054920	Klhl5	0.383886975	0.519378675	1078	775	0.078	0.126	0.436007154	3.13E-06	0.095532979	up
FB_Cluster_0	ENSMUSG00000025607	Copg2	0.468406921	0.603565963	1078	775	0.085	0.135	0.365680097	3.20E-06	0.097611129	up
FB_Cluster_0	ENSMUSG00000029152	Ociad1	0.832131087	0.625674234	1078	775	0.161	0.152	-0.41134192	3.21E-06	0.097759394	down
FB_Cluster_0	ENSMUSG00000021666	Gfm2	0.313201261	0.51981479	1078	775	0.066	0.124	0.730724618	3.22E-06	0.098122457	up
FB_Cluster_0	ENSMUSG00000024982	Zdhhc6	0.455125055	0.627550577	1078	775	0.087	0.143	0.463381646	3.22E-06	0.098285725	up
FB_Cluster_0	ENSMUSG00000032449	Slc25a36	0.76392437	1.046370769	1078	775	0.157	0.232	0.453841452	3.41E-06	0.103887911	up
FB_Cluster_0	ENSMUSG00000078812	Eif5a	0.774882781	0.565139562	1078	775	0.148	0.135	-0.45530181	3.46E-06	0.105338365	down
FB_Cluster_0	ENSMUSG00000084799	Ino80dos	0.328760561	0.442141216	1078	775	0.058	0.101	0.427357486	3.76E-06	0.114604724	up
FB_Cluster_0	ENSMUSG00000102869	2900097C17Rik	1.222902936	0.933828194	1078	775	0.228	0.209	-0.389044331	3.93E-06	0.11973082	down
FB_Cluster_0	ENSMUSG00000031729	Ist1	0.257266233	0.438087818	1078	775	0.056	0.11	0.767726597	3.94E-06	0.120082751	up
FB_Cluster_0	ENSMUSG00000060579	Fhit	0.885819013	1.56384078	1078	775	0.137	0.227	0.819939161	3.96E-06	0.120635363	up
FB_Cluster_0	ENSMUSG00000069631	Strada	0.263946339	0.468640728	1078	775	0.053	0.108	0.827999019	3.96E-06	0.120819666	up
FB_Cluster_0	ENSMUSG00000024740	Ddb1	0.452376426	0.611534283	1078	775	0.093	0.147	0.434826644	3.97E-06	0.120880806	up
FB_Cluster_0	ENSMUSG00000034880	Mrpl34	0.627099927	0.308451859	1078	775	0.121	0.072	-1.023412404	4.01E-06	0.122182809	down
FB_Cluster_0	ENSMUSG00000044712	Slc38a6	0.329294398	0.44014626	1078	775	0.064	0.107	0.418494728	4.04E-06	0.123215196	up
FB_Cluster_0	ENSMUSG00000005575	Ube2m	0.616736749	0.392167631	1078	775	0.123	0.099	-0.653050427	4.06E-06	0.123820156	down
FB_Cluster_0	ENSMUSG00000029201	Ugdh	0.304310562	0.467170438	1078	775	0.061	0.114	0.618239353	4.07E-06	0.124064609	up
FB_Cluster_0	ENSMUSG00000085457	1110046J04Rik	0.278659979	0.454419069	1078	775	0.052	0.102	0.705317373	4.13E-06	0.126016745	up
FB_Cluster_0	ENSMUSG00000032554	Trf	1.999095467	1.529498773	1078	775	0.268	0.262	-0.386266265	4.14E-06	0.126120142	down
FB_Cluster_0	ENSMUSG00000054391	4930517O19Rik	0.294206761	0.512293544	1078	775	0.056	0.111	0.799931613	4.16E-06	0.1267229	up
FB_Cluster_0	ENSMUSG00000022946	Dop1b	0.300081838	0.430069598	1078	775	0.06	0.107	0.519068877	4.16E-06	0.126758734	up
FB_Cluster_0	ENSMUSG00000028226	Mmp16	0.925104507	1.25222038	1078	775	0.148	0.223	0.436759494	4.25E-06	0.129566946	up
FB_Cluster_0	ENSMUSG00000040618	Pck2	0.238318807	0.458610821	1078	775	0.051	0.108	0.944086896	4.34E-06	0.132334282	up
FB_Cluster_0	ENSMUSG00000022772	Senp5	0.525526945	0.761754529	1078	775	0.109	0.175	0.535476318	4.34E-06	0.132426504	up
FB_Cluster_0	ENSMUSG00000025534	Gusb	0.553564476	0.429929318	1078	775	0.108	0.111	-0.364576938	4.37E-06	0.133315535	down
FB_Cluster_0	ENSMUSG00000021936	Mapk8	0.446354039	0.688367255	1078	775	0.093	0.161	0.624876378	4.48E-06	0.136547267	up
FB_Cluster_0	ENSMUSG00000025269	Apex2	0.244838701	0.382869555	1078	775	0.053	0.101	0.644808961	4.67E-06	0.142235511	up
FB_Cluster_0	ENSMUSG00000035293	G2e3	0.321711594	0.430661312	1078	775	0.065	0.108	0.420672381	4.68E-06	0.142743267	up
FB_Cluster_0	ENSMUSG00000023991	Foxp4	0.298588828	0.40368027	1078	775	0.061	0.105	0.434927144	4.71E-06	0.143650425	up
FB_Cluster_0	ENSMUSG00000021798	Ldb3	0.932820188	0.621887669	1078	775	0.17	0.142	-0.584867683	4.76E-06	0.145194233	down
FB_Cluster_0	ENSMUSG00000026701	Prdx6	0.739729213	0.504287246	1078	775	0.139	0.119	-0.552660473	4.93E-06	0.150408145	down
FB_Cluster_0	ENSMUSG00000033429	Mcee	0.731956851	0.536900176	1078	775	0.138	0.129	-0.447033131	5.04E-06	0.153664226	down
FB_Cluster_0	ENSMUSG00000041126	H2az2	0.788937519	0.612412656	1078	775	0.148	0.142	-0.365354248	5.12E-06	0.155904109	down
FB_Cluster_0	ENSMUSG00000031782	Coq9	0.575534989	0.342041116	1078	775	0.105	0.084	-0.750562799	5.12E-06	0.156065013	down
FB_Cluster_0	ENSMUSG00000070394	Tmem256	0.705212828	0.455763589	1078	775	0.125	0.105	-0.629661095	5.36E-06	0.16351314	down
FB_Cluster_0	ENSMUSG00000020290	Xpo1	0.619315442	0.816172259	1078	775	0.118	0.181	0.398143079	5.62E-06	0.17116358	up
FB_Cluster_0	ENSMUSG00000021615	Xrcc4	0.752849481	0.98059456	1078	775	0.123	0.19	0.381250804	5.67E-06	0.172935525	up
FB_Cluster_0	ENSMUSG00000089715	Cbx6	0.334188729	0.508229024	1078	775	0.071	0.126	0.604667891	5.68E-06	0.173086407	up
FB_Cluster_0	ENSMUSG00000030738	Eif3c	1.104856019	0.849009984	1078	775	0.194	0.187	-0.379965605	5.79E-06	0.176489607	down
FB_Cluster_0	ENSMUSG00000002660	Clpp	0.62435281	0.456149176	1078	775	0.122	0.116	-0.452770598	6.12E-06	0.186659973	down
FB_Cluster_0	ENSMUSG00000027566	Psma7	1.113497647	0.768152168	1078	775	0.196	0.166	-0.53557623	6.20E-06	0.189065525	down
FB_Cluster_0	ENSMUSG00000022639	Dubr	0.273224087	0.412105032	1078	775	0.057	0.105	0.592749513	6.26E-06	0.190902442	up
FB_Cluster_0	ENSMUSG00000056116	H2-T22	0.36020019	0.489098569	1078	775	0.071	0.117	0.441220772	6.54E-06	0.199444337	up
FB_Cluster_0	ENSMUSG00000030554	Synm	0.336252107	0.496043795	1078	775	0.067	0.119	0.560786017	6.67E-06	0.203373094	up
FB_Cluster_0	ENSMUSG00000073481	Mtarc2	0.978285654	0.73912264	1078	775	0.192	0.178	-0.404394307	6.87E-06	0.209275613	down
FB_Cluster_0	ENSMUSG00000052837	Junb	0.395886366	0.620779143	1078	775	0.067	0.123	0.648861711	6.95E-06	0.211726746	up
FB_Cluster_0	ENSMUSG00000027004	Frzb	0.443772187	0.750973781	1078	775	0.089	0.157	0.758810323	7.01E-06	0.213791186	up
FB_Cluster_0	ENSMUSG00000038909	Kat7	0.350215444	0.502801516	1078	775	0.07	0.121	0.52162131	7.03E-06	0.214223984	up
FB_Cluster_0	ENSMUSG00000074794	Arrdc3	0.32090629	0.554810283	1078	775	0.062	0.12	0.789652969	7.09E-06	0.216056739	up
FB_Cluster_0	ENSMUSG00000052783	Grk4	0.341388829	0.53992432	1078	775	0.067	0.123	0.661185993	7.09E-06	0.216243222	up
FB_Cluster_0	ENSMUSG00000032386	Trip4	0.459500936	0.781901484	1078	775	0.095	0.166	0.76678961	7.13E-06	0.21739252	up
FB_Cluster_0	ENSMUSG00000063873	Slc24a3	0.832229672	1.087860461	1078	775	0.135	0.199	0.386399153	7.25E-06	0.221118796	up
FB_Cluster_0	ENSMUSG00000036752	Tubb4b	0.827463478	0.474611393	1078	775	0.157	0.107	-0.801819303	7.43E-06	0.22660835	down
FB_Cluster_0	ENSMUSG00000107422	Gm44129	0.607552031	0.81683194	1078	775	0.106	0.164	0.426970483	7.80E-06	0.237617635	up
FB_Cluster_0	ENSMUSG00000024878	Cbwd1	0.311718513	0.44120173	1078	775	0.06	0.107	0.501058818	7.87E-06	0.239881252	up
FB_Cluster_0	ENSMUSG00000024976	Shoc2	0.823960259	1.05980748	1078	775	0.161	0.231	0.363116593	7.91E-06	0.240936504	up
FB_Cluster_0	ENSMUSG00000015994	Fnta	0.330668762	0.437439693	1078	775	0.061	0.103	0.40359091	8.10E-06	0.246973581	up
FB_Cluster_0	ENSMUSG00000027809	Etfdh	0.520458057	0.675103493	1078	775	0.109	0.164	0.375263295	8.53E-06	0.259848814	up
FB_Cluster_0	ENSMUSG00000017817	Jph2	0.677863365	0.417552186	1078	775	0.124	0.103	-0.698905327	8.61E-06	0.262328438	down
FB_Cluster_0	ENSMUSG00000020676	Ccl11	1.646147881	1.094785878	1078	775	0.156	0.151	-0.588401081	9.10E-06	0.27734524	down
FB_Cluster_0	ENSMUSG00000021621	Zcchc9	0.321113928	0.432348613	1078	775	0.064	0.108	0.42899426	9.16E-06	0.279076721	up
FB_Cluster_0	ENSMUSG00000044250	Pced1b	0.475706531	0.683656	1078	775	0.092	0.148	0.523106513	9.29E-06	0.283245122	up
FB_Cluster_0	ENSMUSG00000022025	Cnmd	0.846551949	1.585210381	1078	775	0.079	0.15	0.904924409	9.34E-06	0.284724814	up
FB_Cluster_0	ENSMUSG00000033102	Cdc14b	0.435731486	0.605627901	1078	775	0.082	0.134	0.474899442	9.34E-06	0.284799968	up
FB_Cluster_0	ENSMUSG00000026750	Psmb7	0.59405926	0.373820197	1078	775	0.117	0.094	-0.668119289	9.62E-06	0.293357083	down
FB_Cluster_0	ENSMUSG00000049184	Purg	0.502613046	0.669005759	1078	775	0.099	0.154	0.412499134	9.71E-06	0.295956701	up
FB_Cluster_0	ENSMUSG00000061436	Hipk2	0.426232372	0.567864592	1078	775	0.084	0.137	0.413822387	9.85E-06	0.300286723	up
FB_Cluster_0	ENSMUSG00000029359	Tesc	0.59546643	0.460733523	1078	775	0.115	0.114	-0.37001677	9.99E-06	0.304437372	down
FB_Cluster_0	ENSMUSG00000022234	Cct5	0.582297287	0.388802368	1078	775	0.112	0.098	-0.582595617	1.01E-05	0.308672904	down
FB_Cluster_0	ENSMUSG00000020257	Wdr82	0.566185169	0.408780483	1078	775	0.11	0.102	-0.469849545	1.02E-05	0.309668348	down
FB_Cluster_0	ENSMUSG00000027639	Samhd1	0.329877481	0.45987015	1078	775	0.071	0.117	0.479172665	1.09E-05	0.330872245	up
FB_Cluster_0	ENSMUSG00000033478	Fam160b1	0.3876912	0.507789068	1078	775	0.081	0.128	0.389233357	1.09E-05	0.331019168	up
FB_Cluster_0	ENSMUSG00000021102	Glrx5	0.607451373	0.326320323	1078	775	0.112	0.076	-0.896275522	1.09E-05	0.332462475	down
FB_Cluster_0	ENSMUSG00000024978	Gpam	0.537102907	0.735310323	1078	775	0.109	0.169	0.453082316	1.10E-05	0.336617976	up
FB_Cluster_0	ENSMUSG00000038299	Wdr36	0.297939751	0.444683607	1078	775	0.062	0.111	0.577598856	1.11E-05	0.338565158	up
FB_Cluster_0	ENSMUSG00000085526	Gm16083	0.749296594	1.163139067	1078	775	0.133	0.213	0.634346302	1.12E-05	0.341318432	up
FB_Cluster_0	ENSMUSG00000041040	Fam117b	0.320786798	0.412635019	1078	775	0.065	0.106	0.363151415	1.12E-05	0.34250645	up
FB_Cluster_0	ENSMUSG00000009681	Bcr	0.348108387	0.503078437	1078	775	0.074	0.125	0.531119146	1.13E-05	0.345602057	up
FB_Cluster_0	ENSMUSG00000041992	Rapgef5	0.407262185	0.589788953	1078	775	0.074	0.128	0.534131329	1.18E-05	0.358307029	up
FB_Cluster_0	ENSMUSG00000032839	Trpc1	0.633485584	0.867168658	1078	775	0.121	0.185	0.452939463	1.18E-05	0.360950022	up
FB_Cluster_0	ENSMUSG00000028007	Snx7	0.414234243	0.599550891	1078	775	0.085	0.143	0.533327768	1.19E-05	0.361774268	up
FB_Cluster_0	ENSMUSG00000086708	Gm15577	0.238865363	0.474140248	1078	775	0.046	0.101	0.988816588	1.23E-05	0.375481914	up
FB_Cluster_0	ENSMUSG00000033066	Gas7	0.542534221	0.76343684	1078	775	0.103	0.165	0.492717735	1.23E-05	0.375742452	up
FB_Cluster_0	ENSMUSG00000032507	Fbxl2	0.354208364	0.547286584	1078	775	0.065	0.117	0.627554551	1.25E-05	0.379922465	up
FB_Cluster_0	ENSMUSG00000061533	Cep128	0.41406101	0.624306878	1078	775	0.083	0.142	0.592294687	1.25E-05	0.382272599	up
FB_Cluster_0	ENSMUSG00000037287	Tbcel	0.325564221	0.425668312	1078	775	0.062	0.102	0.386683353	1.27E-05	0.386653498	up
FB_Cluster_0	ENSMUSG00000038845	Phb	0.634354252	0.462432464	1078	775	0.124	0.115	-0.455961511	1.30E-05	0.394793986	down
FB_Cluster_0	ENSMUSG00000025584	Pde8a	0.380337166	0.505253064	1078	775	0.077	0.124	0.409633482	1.35E-05	0.410934047	up
FB_Cluster_0	ENSMUSG00000032220	Myo1e	0.40401217	0.56864715	1078	775	0.075	0.129	0.493031611	1.35E-05	0.41240309	up
FB_Cluster_0	ENSMUSG00000030616	Sytl2	0.305258358	0.4079344	1078	775	0.06	0.101	0.418187451	1.45E-05	0.443226742	up
FB_Cluster_0	ENSMUSG00000006299	Aamp	0.504490807	0.373334059	1078	775	0.101	0.099	-0.434260408	1.46E-05	0.444068935	down
FB_Cluster_0	ENSMUSG00000022685	Parn	0.446619645	0.590753894	1078	775	0.091	0.139	0.403431725	1.47E-05	0.447642413	up
FB_Cluster_0	ENSMUSG00000024381	Bin1	0.383843847	0.514048436	1078	775	0.073	0.119	0.421289602	1.50E-05	0.456563001	up
FB_Cluster_0	ENSMUSG00000032932	Hspa13	0.522389607	0.351476753	1078	775	0.104	0.092	-0.571562658	1.51E-05	0.461327811	down
FB_Cluster_0	ENSMUSG00000038970	Lmtk2	0.325385123	0.448944263	1078	775	0.067	0.11	0.464266055	1.54E-05	0.4680746	up
FB_Cluster_0	ENSMUSG00000055653	Gpc3	0.502056681	0.69861533	1078	775	0.078	0.129	0.476567215	1.58E-05	0.482865348	up
FB_Cluster_0	ENSMUSG00000022837	Iqcb1	0.401004293	0.541318514	1078	775	0.074	0.123	0.432766813	1.60E-05	0.487444858	up
FB_Cluster_0	ENSMUSG00000044072	Eml6	0.575197201	0.794172983	1078	775	0.102	0.161	0.465327479	1.64E-05	0.499152615	up
FB_Cluster_0	ENSMUSG00000038880	Mrps34	0.554928466	0.265414296	1078	775	0.102	0.063	-1.063772223	1.64E-05	0.499467126	down
FB_Cluster_0	ENSMUSG00000042225	Ammecr1	0.415469161	0.57929898	1078	775	0.086	0.138	0.479468547	1.65E-05	0.503930185	up
FB_Cluster_0	ENSMUSG00000047446	Arl4a	0.579522881	0.415702711	1078	775	0.104	0.098	-0.479215384	1.67E-05	0.509637965	down
FB_Cluster_0	ENSMUSG00000028998	Tomm7	0.960888456	0.608448005	1078	775	0.178	0.137	-0.659148027	1.71E-05	0.522124968	down
FB_Cluster_0	ENSMUSG00000031758	Cdyl2	0.458350982	0.709088756	1078	775	0.084	0.145	0.629402175	1.72E-05	0.52346445	up
FB_Cluster_0	ENSMUSG00000049960	Mrps16	0.590597995	0.391982089	1078	775	0.109	0.092	-0.591264977	1.77E-05	0.538502922	down
FB_Cluster_0	ENSMUSG00000039844	Rapgef1	0.477490747	0.659701839	1078	775	0.096	0.152	0.466257912	1.82E-05	0.553524634	up
FB_Cluster_0	ENSMUSG00000085091	Egfros	1.186264631	0.903415319	1078	775	0.19	0.186	-0.392926526	1.84E-05	0.562149836	down
FB_Cluster_0	ENSMUSG00000025920	Stau2	0.33133703	0.481482867	1078	775	0.062	0.11	0.539049271	1.90E-05	0.57794497	up
FB_Cluster_0	ENSMUSG00000034042	Gpbp1l1	0.561794494	0.797883016	1078	775	0.113	0.177	0.506058779	1.93E-05	0.587373685	up
FB_Cluster_0	ENSMUSG00000022507	1810013L24Rik	0.383653082	0.501920581	1078	775	0.083	0.128	0.387568173	1.98E-05	0.603626165	up
FB_Cluster_0	ENSMUSG00000027293	Ehd4	0.750048809	0.445183742	1078	775	0.136	0.101	-0.752451878	2.01E-05	0.611909446	down
FB_Cluster_0	ENSMUSG00000058672	Tubb2a	0.546712019	0.355103623	1078	775	0.103	0.089	-0.622398654	2.02E-05	0.617124672	down
FB_Cluster_0	ENSMUSG00000035517	Tdrd7	0.337215609	0.47703303	1078	775	0.07	0.116	0.500292484	2.08E-05	0.634822835	up
FB_Cluster_0	ENSMUSG00000024642	Tle4	0.584770785	0.797627656	1078	775	0.112	0.172	0.447778367	2.14E-05	0.652377786	up
FB_Cluster_0	ENSMUSG00000039405	Prss23	1.234203521	0.901779163	1078	775	0.207	0.185	-0.452691149	2.17E-05	0.660749956	down
FB_Cluster_0	ENSMUSG00000090553	Snrpe	0.587150235	0.454200382	1078	775	0.11	0.111	-0.370328867	2.22E-05	0.676281854	down
FB_Cluster_0	ENSMUSG00000036180	Gatad2a	0.38622389	0.504244112	1078	775	0.079	0.125	0.384597522	2.24E-05	0.682207609	up
FB_Cluster_0	ENSMUSG00000001986	Gria3	0.836851972	1.358622154	1078	775	0.143	0.226	0.699033726	2.30E-05	0.70203567	up
FB_Cluster_0	ENSMUSG00000051695	Pcbp1	0.598850119	0.456791173	1078	775	0.123	0.116	-0.390585291	2.31E-05	0.704137896	down
FB_Cluster_0	ENSMUSG00000042700	Sipa1l1	0.343998427	0.467135136	1078	775	0.065	0.11	0.441327474	2.46E-05	0.750351256	up
FB_Cluster_0	ENSMUSG00000035382	Pcsk7	0.493667297	0.644424206	1078	775	0.1	0.148	0.384403255	2.57E-05	0.784669397	up
FB_Cluster_0	ENSMUSG00000086429	Gt(ROSA)26Sor	0.324558029	0.448056537	1078	775	0.073	0.121	0.465081853	2.64E-05	0.805179696	up
FB_Cluster_0	ENSMUSG00000063856	Gpx1	0.647426814	0.503671615	1078	775	0.123	0.12	-0.3621701	2.69E-05	0.819781307	down
FB_Cluster_0	ENSMUSG00000028333	Anp32b	0.663691653	0.433389471	1078	775	0.127	0.108	-0.614733537	2.71E-05	0.826728219	down
FB_Cluster_0	ENSMUSG00000057278	Snrpg	0.384887741	0.600966621	1078	775	0.081	0.138	0.642712396	2.74E-05	0.835779447	up
FB_Cluster_0	ENSMUSG00000020375	Rufy1	0.385591155	0.512500048	1078	775	0.076	0.12	0.410387552	2.84E-05	0.865101253	up
FB_Cluster_0	ENSMUSG00000032232	Cgnl1	0.405766287	0.54968125	1078	775	0.078	0.125	0.437853198	2.98E-05	0.908781511	up
FB_Cluster_0	ENSMUSG00000038718	Pbx3	0.913287854	1.265503707	1078	775	0.149	0.222	0.47052622	3.04E-05	0.926542936	up
FB_Cluster_0	ENSMUSG00000025930	Msc	0.465878393	0.668367183	1078	775	0.093	0.15	0.520593676	3.12E-05	0.95018104	up
FB_Cluster_0	ENSMUSG00000020023	Tmcc3	0.994283823	1.364626167	1078	775	0.177	0.253	0.456736771	3.13E-05	0.952876985	up
FB_Cluster_0	ENSMUSG00000072623	Zfp9	0.391127022	0.545682927	1078	775	0.078	0.129	0.480321243	3.37E-05	1	up
FB_Cluster_0	ENSMUSG00000022808	Snx4	0.640100833	0.496873451	1078	775	0.122	0.121	-0.365355771	3.45E-05	1	down
FB_Cluster_0	ENSMUSG00000031950	Gabarapl2	0.720974028	0.560529989	1078	775	0.135	0.13	-0.363098461	3.49E-05	1	down
FB_Cluster_0	ENSMUSG00000051329	Nup160	0.376600973	0.511211286	1078	775	0.066	0.112	0.440782109	3.70E-05	1	up
FB_Cluster_0	ENSMUSG00000014177	Tvp23b	0.519149802	0.382554792	1078	775	0.103	0.098	-0.440385295	3.70E-05	1	down
FB_Cluster_0	ENSMUSG00000060206	Zfp462	0.332924093	0.473912777	1078	775	0.065	0.111	0.509299395	3.70E-05	1	up
FB_Cluster_0	ENSMUSG00000018433	Nol11	0.288803497	0.439901156	1078	775	0.059	0.106	0.606919646	3.81E-05	1	up
FB_Cluster_0	ENSMUSG00000045975	C2cd2	0.311763705	0.448891654	1078	775	0.063	0.107	0.525772969	3.94E-05	1	up
FB_Cluster_0	ENSMUSG00000030814	Bcl7c	0.574288959	0.387232071	1078	775	0.112	0.095	-0.568457054	4.04E-05	1	down
FB_Cluster_0	ENSMUSG00000032263	Bckdhb	0.59088985	0.41525521	1078	775	0.106	0.101	-0.508787702	4.17E-05	1	down
FB_Cluster_0	ENSMUSG00000016386	Mpped2	0.638145417	0.833800295	1078	775	0.117	0.174	0.385763626	4.25E-05	1	up
FB_Cluster_0	ENSMUSG00000045193	Cirbp	0.334552221	0.501467259	1078	775	0.067	0.116	0.583780587	4.30E-05	1	up
FB_Cluster_0	ENSMUSG00000038302	Afg1l	0.450039499	0.644957315	1078	775	0.088	0.139	0.519055188	4.47E-05	1	up
FB_Cluster_0	ENSMUSG00000032000	Birc3	0.496266902	0.647368001	1078	775	0.097	0.146	0.383401976	4.62E-05	1	up
FB_Cluster_0	ENSMUSG00000090117	Gm16541	0.349100663	0.534377133	1078	775	0.065	0.117	0.614071927	4.71E-05	1	up
FB_Cluster_0	ENSMUSG00000078566	Bnip3	0.316153641	0.429670443	1078	775	0.062	0.103	0.442484177	4.71E-05	1	up
FB_Cluster_0	ENSMUSG00000026755	Arpc5l	0.602364392	0.385806546	1078	775	0.12	0.095	-0.642624459	4.90E-05	1	down
FB_Cluster_0	ENSMUSG00000028062	Lamtor2	0.597257585	0.441654982	1078	775	0.114	0.107	-0.4353484	4.92E-05	1	down
FB_Cluster_0	ENSMUSG00000038042	Ptpdc1	0.296839737	0.457985581	1078	775	0.061	0.108	0.625446984	4.99E-05	1	up
FB_Cluster_0	ENSMUSG00000034731	Dgkh	0.495854238	0.740083225	1078	775	0.095	0.154	0.577675432	5.10E-05	1	up
FB_Cluster_0	ENSMUSG00000106395	Gm42439	0.440007314	0.571131923	1078	775	0.081	0.124	0.376221257	5.49E-05	1	up
FB_Cluster_0	ENSMUSG00000043635	Adamts3	0.419109377	0.572836776	1078	775	0.068	0.115	0.450704958	5.61E-05	1	up
FB_Cluster_0	ENSMUSG00000009535	Rnmt	0.275539575	0.434043472	1078	775	0.057	0.103	0.655388855	6.00E-05	1	up
FB_Cluster_0	ENSMUSG00000031360	Ctps2	0.425301672	0.561464871	1078	775	0.083	0.129	0.400626985	6.04E-05	1	up
FB_Cluster_0	ENSMUSG00000041229	Phf8	0.379126694	0.524272177	1078	775	0.076	0.123	0.467530619	6.23E-05	1	up
FB_Cluster_0	ENSMUSG00000016024	Lbp	0.818055586	0.567350453	1078	775	0.152	0.13	-0.527880794	6.34E-05	1	down
FB_Cluster_0	ENSMUSG00000028156	Eif4e	0.711348599	0.463566691	1078	775	0.136	0.112	-0.617671438	6.49E-05	1	down
FB_Cluster_0	ENSMUSG00000020415	Pttg1	0.6199593	0.34654873	1078	775	0.113	0.083	-0.838931722	6.65E-05	1	down
FB_Cluster_0	ENSMUSG00000046519	Golph3l	0.271496675	0.449721347	1078	775	0.054	0.102	0.727886311	6.69E-05	1	up
FB_Cluster_0	ENSMUSG00000034518	Hmgxb4	0.38829255	0.533125135	1078	775	0.078	0.124	0.45722926	6.84E-05	1	up
FB_Cluster_0	ENSMUSG00000029376	Mthfd2l	0.395339307	0.527570931	1078	775	0.076	0.119	0.416182223	7.46E-05	1	up
FB_Cluster_0	ENSMUSG00000041773	Enc1	0.556189075	0.364890885	1078	775	0.105	0.088	-0.607974337	8.19E-05	1	down
FB_Cluster_0	ENSMUSG00000033014	Trim33	0.811467569	1.057815968	1078	775	0.159	0.225	0.382441916	8.35E-05	1	up
FB_Cluster_0	ENSMUSG00000010721	Lmbr1	0.713357631	0.952074535	1078	775	0.138	0.203	0.416398289	8.36E-05	1	up
FB_Cluster_0	ENSMUSG00000059182	Skap2	0.250964217	0.49200865	1078	775	0.052	0.105	0.970920454	8.70E-05	1	up
FB_Cluster_0	ENSMUSG00000036398	Ppp1r11	0.531753067	0.37375369	1078	775	0.107	0.093	-0.508553963	9.84E-05	1	down
FB_Cluster_0	ENSMUSG00000030257	Srgap3	0.33603578	0.476702502	1078	775	0.067	0.111	0.504347688	0.000109186	1	up
FB_Cluster_0	ENSMUSG00000017188	Coa3	0.55038022	0.36247119	1078	775	0.103	0.088	-0.602426433	0.000112055	1	down
FB_Cluster_0	ENSMUSG00000039683	Sdk1	0.767582574	1.045096299	1078	775	0.113	0.174	0.445192115	0.000112573	1	up
FB_Cluster_0	ENSMUSG00000001525	Tubb5	0.655549305	0.468789078	1078	775	0.125	0.11	-0.483677677	0.00011529	1	down
FB_Cluster_0	ENSMUSG00000000827	Tpd52l2	0.584257051	0.440450912	1078	775	0.11	0.108	-0.407541395	0.000119353	1	down
FB_Cluster_0	ENSMUSG00000038141	Tmem181a	0.304722865	0.416206619	1078	775	0.062	0.101	0.449675375	0.00012055	1	up
FB_Cluster_0	ENSMUSG00000014932	Yes1	0.332659106	0.431517219	1078	775	0.067	0.105	0.375274273	0.000121849	1	up
FB_Cluster_0	ENSMUSG00000030562	Nox4	0.809695912	1.083027814	1078	775	0.113	0.174	0.419573232	0.000153246	1	up
FB_Cluster_0	ENSMUSG00000030588	Yif1b	0.589560883	0.450917077	1078	775	0.115	0.111	-0.386703431	0.000158595	1	down
FB_Cluster_0	ENSMUSG00000046159	Chrm3	0.939679434	1.559842155	1078	775	0.103	0.169	0.731098432	0.000161086	1	up
FB_Cluster_0	ENSMUSG00000030555	Ttc23	0.483657966	0.648149469	1078	775	0.094	0.142	0.422263703	0.000168872	1	up
FB_Cluster_0	ENSMUSG00000037458	Azin1	0.615485474	0.469551816	1078	775	0.117	0.111	-0.3903676	0.000176297	1	down
FB_Cluster_0	ENSMUSG00000041272	Tox	0.848577279	1.300896323	1078	775	0.135	0.201	0.616328926	0.000180256	1	up
FB_Cluster_0	ENSMUSG00000034211	Mrps17	0.681360203	0.497632325	1078	775	0.134	0.117	-0.45325932	0.000184657	1	down
FB_Cluster_0	ENSMUSG00000054091	1810037I17Rik	0.554194391	0.417046369	1078	775	0.109	0.103	-0.410098722	0.000185738	1	down
FB_Cluster_0	ENSMUSG00000107002	0610012G03Rik	0.639708573	0.40407049	1078	775	0.122	0.094	-0.662676337	0.000186717	1	down
FB_Cluster_0	ENSMUSG00000001674	Ddx18	0.343091119	0.484159854	1078	775	0.071	0.116	0.496769186	0.00020676	1	up
FB_Cluster_0	ENSMUSG00000045160	Bola3	0.922860135	0.678185918	1078	775	0.165	0.146	-0.444374796	0.000215394	1	down
FB_Cluster_0	ENSMUSG00000026532	Spta1	0.848255934	1.259197837	1078	775	0.135	0.203	0.569877946	0.000233829	1	up
FB_Cluster_0	ENSMUSG00000053617	Sh3pxd2a	0.420225771	0.543525709	1078	775	0.086	0.128	0.371105772	0.000241869	1	up
FB_Cluster_0	ENSMUSG00000038384	Setd1b	0.316171699	0.431805228	1078	775	0.065	0.105	0.449550314	0.000247575	1	up
FB_Cluster_0	ENSMUSG00000037035	Inhbb	0.251316029	0.40501368	1078	775	0.057	0.102	0.688250173	0.000255565	1	up
FB_Cluster_0	ENSMUSG00000032051	Fdx1	0.532570436	0.303070543	1078	775	0.105	0.072	-0.813113627	0.000257716	1	down
FB_Cluster_0	ENSMUSG00000018965	Ywhah	0.626623044	0.439831173	1078	775	0.123	0.107	-0.510550209	0.000257866	1	down
FB_Cluster_0	ENSMUSG00000017132	Cyth1	0.286446395	0.415492573	1078	775	0.061	0.102	0.536401123	0.000284427	1	up
FB_Cluster_0	ENSMUSG00000103649	Gm37768	0.383842283	0.51774197	1078	775	0.079	0.121	0.431622445	0.000313602	1	up
FB_Cluster_0	ENSMUSG00000029405	G3bp2	0.55774043	0.404748751	1078	775	0.11	0.099	-0.462469469	0.000336928	1	down
FB_Cluster_0	ENSMUSG00000024598	Fbn2	0.716228356	1.047174674	1078	775	0.105	0.161	0.547946918	0.000373208	1	up
FB_Cluster_0	ENSMUSG00000044408	Sptssa	0.514187766	0.373362997	1078	775	0.101	0.092	-0.461610526	0.000396122	1	down
FB_Cluster_0	ENSMUSG00000063480	Snu13	0.636899756	0.382564422	1078	775	0.119	0.085	-0.735213049	0.000401336	1	down
FB_Cluster_0	ENSMUSG00000042063	Zfp386	0.291618256	0.444028347	1078	775	0.069	0.114	0.606400984	0.000416249	1	up
FB_Cluster_0	ENSMUSG00000035164	Zc3h12c	0.316354079	0.441008742	1078	775	0.062	0.101	0.479138188	0.00045631	1	up
FB_Cluster_0	ENSMUSG00000028059	Arhgef2	0.552113457	0.776855183	1078	775	0.116	0.174	0.492605335	0.000474276	1	up
FB_Cluster_0	ENSMUSG00000023904	Hcfc1r1	0.623353443	0.41829806	1078	775	0.124	0.102	-0.575405667	0.000480889	1	down
FB_Cluster_0	ENSMUSG00000026455	Klhl12	0.313118749	0.496687003	1078	775	0.062	0.107	0.66545686	0.000498144	1	up
FB_Cluster_0	ENSMUSG00000022906	Parp9	0.333462375	0.458392695	1078	775	0.061	0.101	0.458942181	0.000624218	1	up
FB_Cluster_0	ENSMUSG00000078677	Gm10974	0.375399965	0.497794423	1078	775	0.071	0.108	0.407027082	0.000635619	1	up
FB_Cluster_0	ENSMUSG00000022216	Psme1	0.692595835	0.519294296	1078	775	0.127	0.116	-0.415391829	0.000677077	1	down
FB_Cluster_0	ENSMUSG00000031972	Acta1	0.649493635	0.362867865	1078	775	0.119	0.074	-0.839695671	0.000703294	1	down
FB_Cluster_0	ENSMUSG00000026527	Rgs7	0.418822853	0.674670725	1078	775	0.071	0.121	0.687712796	0.000717232	1	up
FB_Cluster_0	ENSMUSG00000048799	Cep120	0.478475026	0.638111944	1078	775	0.1	0.147	0.415290496	0.000748302	1	up
FB_Cluster_0	ENSMUSG00000025323	Sp4	0.365057537	0.471274048	1078	775	0.071	0.107	0.368353322	0.000760362	1	up
FB_Cluster_0	ENSMUSG00000023868	Pde10a	0.902213747	0.57932633	1078	775	0.137	0.124	-0.639003921	0.000894162	1	down
FB_Cluster_0	ENSMUSG00000071226	Cecr2	0.312500524	0.467407434	1078	775	0.062	0.103	0.580669112	0.000942412	1	up
FB_Cluster_0	ENSMUSG00000031109	Enox2	0.665736883	0.898249488	1078	775	0.115	0.166	0.432108023	0.000954027	1	up
FB_Cluster_0	ENSMUSG00000046873	Mbtps2	0.292648808	0.455191959	1078	775	0.064	0.107	0.637128684	0.000997787	1	up
FB_Cluster_0	ENSMUSG00000085169	Gm10785	0.462417048	0.645113488	1078	775	0.09	0.137	0.480270054	0.001067758	1	up
FB_Cluster_0	ENSMUSG00000022360	Atad2	0.394067969	0.512282953	1078	775	0.08	0.117	0.378411934	0.001306826	1	up
FB_Cluster_0	ENSMUSG00000069670	Nkain2	5.880241343	9.746193504	1078	775	0.229	0.303	0.728953766	0.001462002	1	up
FB_Cluster_0	ENSMUSG00000073590	3222401L13Rik	0.363897067	0.476413505	1078	775	0.072	0.11	0.388590276	0.001624871	1	up
FB_Cluster_0	ENSMUSG00000031134	Rbmx	0.344802828	0.472406196	1078	775	0.072	0.111	0.454143289	0.001758738	1	up
FB_Cluster_0	ENSMUSG00000062761	Zfp512	0.324312969	0.433377674	1078	775	0.07	0.107	0.418126196	0.001777195	1	up
FB_Cluster_0	ENSMUSG00000069520	Tmem19	0.333136422	0.529497568	1078	775	0.069	0.111	0.668350405	0.001836904	1	up
FB_Cluster_0	ENSMUSG00000053580	Tanc2	0.97756991	1.331729528	1078	775	0.175	0.24	0.445990075	0.001845949	1	up
FB_Cluster_0	ENSMUSG00000039804	Ncoa5	0.364343335	0.512049969	1078	775	0.081	0.123	0.490871809	0.002265258	1	up
FB_Cluster_0	ENSMUSG00000116673	A630089N07Rik	0.557897013	0.753498176	1078	775	0.108	0.155	0.433538073	0.002347683	1	up
FB_Cluster_0	ENSMUSG00000055148	Klf2	1.372718407	1.048477065	1078	775	0.234	0.195	-0.388707906	0.002409859	1	down
FB_Cluster_0	ENSMUSG00000039990	Edrf1	0.336471756	0.446840904	1078	775	0.069	0.101	0.40916997	0.002518602	1	up
FB_Cluster_0	ENSMUSG00000041144	Dnah7b	0.304251318	0.494393824	1078	775	0.061	0.102	0.700214891	0.002866576	1	up
FB_Cluster_0	ENSMUSG00000035279	Ssc5d	0.44801557	0.606411772	1078	775	0.098	0.141	0.436664793	0.003486452	1	up
FB_Cluster_0	ENSMUSG00000027737	Slc7a11	0.716293319	0.947900144	1078	775	0.12	0.165	0.404135394	0.005287417	1	up
FB_Cluster_0	ENSMUSG00000056612	Ppp1r14b	0.65389206	0.497882746	1078	775	0.131	0.112	-0.393177363	0.008194953	1	down
FB_Cluster_0	ENSMUSG00000059921	Unc5c	0.456362636	0.645155832	1078	775	0.068	0.103	0.499374503	0.010887145	1	up
FB_Cluster_0	ENSMUSG00000030760	Acer3	0.386739873	0.508378905	1078	775	0.078	0.111	0.394451417	0.015140919	1	up
FB_Cluster_0	ENSMUSG00000043613	Mmp3	2.389230177	1.545856172	1078	775	0.119	0.111	-0.628106812	0.017299136	1	down
FB_Cluster_0	ENSMUSG00000027996	Sfrp2	0.73700463	0.483409803	1078	775	0.105	0.08	-0.608324282	0.025915112	1	down
FB_Cluster_1	ENSMUSG00000059741	Myl3	37.42776265	12.53291125	874	902	0.995	0.896	-1.578379577	9.01E-216	2.75E-211	down
FB_Cluster_1	ENSMUSG00000032366	Tpm1	50.9164136	18.98946928	874	902	0.999	0.948	-1.422926454	1.40E-214	4.27E-210	down
FB_Cluster_1	ENSMUSG00000026414	Tnnt2	33.15747301	10.92002022	874	902	0.993	0.869	-1.602349672	1.17E-213	3.57E-209	down
FB_Cluster_1	ENSMUSG00000035458	Tnni3	31.91443899	11.02594072	874	902	0.994	0.884	-1.533298973	2.49E-209	7.58E-205	down
FB_Cluster_1	ENSMUSG00000013936	Myl2	35.43990162	14.3328705	874	902	0.998	0.939	-1.306041032	1.86E-175	5.66E-171	down
FB_Cluster_1	ENSMUSG00000031633	Slc25a4	24.55469553	10.630475	874	902	0.981	0.859	-1.207785176	7.88E-120	2.40E-115	down
FB_Cluster_1	ENSMUSG00000091898	Tnnc1	14.46038133	5.033585595	874	902	0.884	0.601	-1.522428561	1.12E-116	3.42E-112	down
FB_Cluster_1	ENSMUSG00000030785	Cox6a2	20.53300762	8.722416064	874	902	0.955	0.803	-1.235135737	3.21E-108	9.78E-104	down
FB_Cluster_1	ENSMUSG00000068614	Actc1	19.17735062	7.863547944	874	902	0.942	0.768	-1.286140307	3.69E-108	1.13E-103	down
FB_Cluster_1	ENSMUSG00000018893	Mb	24.80895147	11.57454171	874	902	0.982	0.88	-1.099899041	4.62E-108	1.41E-103	down
FB_Cluster_1	ENSMUSG00000032060	Cryab	11.74616835	4.487497392	874	902	0.856	0.571	-1.388187348	1.09E-91	3.33E-87	down
FB_Cluster_1	ENSMUSG00000031818	Cox4i1	18.27626741	8.478765871	874	902	0.926	0.792	-1.108036142	6.64E-88	2.02E-83	down
FB_Cluster_1	ENSMUSG00000041616	Nppa	8.889880694	2.069223904	874	902	0.697	0.315	-2.103020803	4.43E-87	1.35E-82	down
FB_Cluster_1	ENSMUSG00000000088	Cox5a	10.99090297	4.182756419	874	902	0.836	0.561	-1.393762662	7.41E-86	2.26E-81	down
FB_Cluster_1	ENSMUSG00000006057	Atp5g1	13.7907989	5.912987722	874	902	0.892	0.631	-1.221732911	1.72E-85	5.24E-81	down
FB_Cluster_1	ENSMUSG00000040752	Myh6	39.86572424	22.10268826	874	902	0.997	0.966	-0.850924121	9.60E-81	2.92E-76	down
FB_Cluster_1	ENSMUSG00000038583	Pln	12.85240684	6.249093054	874	902	0.866	0.698	-1.040307965	1.47E-69	4.47E-65	down
FB_Cluster_1	ENSMUSG00000029467	Atp2a2	20.4824131	10.26381159	874	902	0.931	0.843	-0.996812088	5.32E-66	1.62E-61	down
FB_Cluster_1	ENSMUSG00000002289	Angptl4	0.076509615	1.543088641	874	902	0.014	0.28	4.332245156	9.42E-66	2.87E-61	up
FB_Cluster_1	ENSMUSG00000030470	Csrp3	6.913208295	2.539338084	874	902	0.662	0.373	-1.444866964	1.37E-63	4.19E-59	down
FB_Cluster_1	ENSMUSG00000022354	Ndufb9	8.885992496	3.792978435	874	902	0.751	0.506	-1.228179954	2.88E-58	8.79E-54	down
FB_Cluster_1	ENSMUSG00000061086	Myl4	3.170426418	0.650494418	874	902	0.407	0.119	-2.284892048	1.91E-54	5.83E-50	down
FB_Cluster_1	ENSMUSG00000049422	Chchd10	8.466810343	3.8023638	874	902	0.739	0.53	-1.154901099	7.26E-54	2.21E-49	down
FB_Cluster_1	ENSMUSG00000057666	Gapdh	5.915828261	2.389813853	874	902	0.64	0.398	-1.307645942	7.79E-53	2.37E-48	down
FB_Cluster_1	ENSMUSG00000022956	Atp5o	6.728861802	2.625864422	874	902	0.635	0.401	-1.357536561	1.82E-52	5.56E-48	down
FB_Cluster_1	ENSMUSG00000034566	Atp5h	11.46233113	5.875760524	874	902	0.831	0.666	-0.964041009	2.83E-51	8.64E-47	down
FB_Cluster_1	ENSMUSG00000020321	Mdh1	5.32558299	2.139887297	874	902	0.573	0.364	-1.315364323	1.06E-49	3.24E-45	down
FB_Cluster_1	ENSMUSG00000030246	Ldhb	4.50104057	1.590060663	874	902	0.526	0.272	-1.501118084	5.28E-49	1.61E-44	down
FB_Cluster_1	ENSMUSG00000023944	Hsp90ab1	7.73097621	3.745053974	874	902	0.716	0.529	-1.045644226	5.56E-48	1.70E-43	down
FB_Cluster_1	ENSMUSG00000019577	Pdk4	0.293210579	1.695059685	874	902	0.048	0.297	2.53092017	4.58E-47	1.39E-42	up
FB_Cluster_1	ENSMUSG00000030399	Ckm	5.423083687	2.107857635	874	902	0.59	0.337	-1.363294164	9.16E-47	2.79E-42	down
FB_Cluster_1	ENSMUSG00000075706	Gpx4	5.21457973	2.115556845	874	902	0.569	0.343	-1.301473005	1.39E-44	4.22E-40	down
FB_Cluster_1	ENSMUSG00000031231	Cox7b	8.115253447	4.018825314	874	902	0.714	0.551	-1.013844162	1.50E-44	4.56E-40	down
FB_Cluster_1	ENSMUSG00000025428	Atp5a1	9.406683813	5.042593234	874	902	0.808	0.626	-0.899507085	1.64E-44	5.00E-40	down
FB_Cluster_1	ENSMUSG00000070493	Chchd2	8.477851741	4.505465245	874	902	0.762	0.582	-0.912007644	3.22E-44	9.81E-40	down
FB_Cluster_1	ENSMUSG00000023861	Mpc1	4.483893641	1.692472412	874	902	0.518	0.297	-1.405566676	1.42E-42	4.32E-38	down
FB_Cluster_1	ENSMUSG00000044080	S100a1	5.195217404	2.16544	874	902	0.573	0.339	-1.262485071	4.57E-41	1.39E-36	down
FB_Cluster_1	ENSMUSG00000024661	Fth1	15.01690494	8.77505439	874	902	0.87	0.784	-0.77510069	2.61E-40	7.97E-36	down
FB_Cluster_1	ENSMUSG00000035530	Eif1	8.435695027	4.514342613	874	902	0.732	0.581	-0.901976168	5.76E-40	1.75E-35	down
FB_Cluster_1	ENSMUSG00000003072	Atp5d	4.32983248	1.908328623	874	902	0.498	0.339	-1.181959299	1.17E-39	3.56E-35	down
FB_Cluster_1	ENSMUSG00000062683	Atp5g2	3.574093552	1.298643169	874	902	0.459	0.231	-1.460501601	7.98E-39	2.43E-34	down
FB_Cluster_1	ENSMUSG00000040048	Ndufb10	5.209426246	2.252313795	874	902	0.568	0.35	-1.209680288	2.72E-38	8.30E-34	down
FB_Cluster_1	ENSMUSG00000060126	Tpt1	11.22118528	6.821255318	874	902	0.839	0.751	-0.718107613	8.43E-38	2.57E-33	down
FB_Cluster_1	ENSMUSG00000002985	Apoe	17.04561073	7.110747159	874	902	0.704	0.545	-1.261315403	2.52E-37	7.69E-33	down
FB_Cluster_1	ENSMUSG00000000740	Rpl13	8.271545288	4.388510761	874	902	0.717	0.559	-0.914410001	3.13E-37	9.55E-33	down
FB_Cluster_1	ENSMUSG00000025204	Ndufb8	5.528730654	2.696120797	874	902	0.602	0.418	-1.036035738	4.99E-36	1.52E-31	down
FB_Cluster_1	ENSMUSG00000022186	Oxct1	3.046739358	0.926938139	874	902	0.394	0.162	-1.716612838	5.43E-36	1.65E-31	down
FB_Cluster_1	ENSMUSG00000025781	Atp5c1	5.765837402	2.914847989	874	902	0.616	0.445	-0.984085032	3.35E-35	1.02E-30	down
FB_Cluster_1	ENSMUSG00000027875	Hmgcs2	0.354565869	1.562881377	874	902	0.061	0.275	2.139768181	6.83E-35	2.08E-30	up
FB_Cluster_1	ENSMUSG00000017778	Cox7c	11.16643448	6.927899082	874	902	0.827	0.728	-0.688670872	9.79E-34	2.98E-29	down
FB_Cluster_1	ENSMUSG00000038690	Atp5j2	7.986380647	4.520618237	874	902	0.709	0.583	-0.821007898	1.65E-33	5.02E-29	down
FB_Cluster_1	ENSMUSG00000051747	Ttn	22.06660675	12.54524381	874	902	0.9	0.839	-0.814719328	1.93E-33	5.87E-29	down
FB_Cluster_1	ENSMUSG00000030869	Ndufab1	5.371619818	2.690323656	874	902	0.592	0.411	-0.997550688	2.94E-33	8.97E-29	down
FB_Cluster_1	ENSMUSG00000063882	Uqcrh	6.255163017	3.319217578	874	902	0.636	0.481	-0.91418388	3.62E-33	1.10E-28	down
FB_Cluster_1	ENSMUSG00000021622	Ckmt2	4.815819671	2.209427548	874	902	0.548	0.339	-1.12407341	5.52E-33	1.68E-28	down
FB_Cluster_1	ENSMUSG00000030541	Idh2	5.133047615	2.480666879	874	902	0.557	0.394	-1.049057579	1.14E-32	3.47E-28	down
FB_Cluster_1	ENSMUSG00000038393	Txnip	2.430736021	5.186904335	874	902	0.324	0.608	1.093449	1.24E-32	3.79E-28	up
FB_Cluster_1	ENSMUSG00000022890	Atp5j	7.742315057	4.399178518	874	902	0.72	0.591	-0.815516709	3.30E-32	1.01E-27	down
FB_Cluster_1	ENSMUSG00000026895	Ndufa8	2.946954164	1.1568517	874	902	0.403	0.222	-1.348944939	4.86E-32	1.48E-27	down
FB_Cluster_1	ENSMUSG00000029632	Ndufa4	10.46429476	6.38324038	874	902	0.801	0.708	-0.713105388	1.16E-31	3.52E-27	down
FB_Cluster_1	ENSMUSG00000061518	Cox5b	6.702820844	3.724753809	874	902	0.651	0.532	-0.847606092	1.27E-31	3.86E-27	down
FB_Cluster_1	ENSMUSG00000041828	Abca8a	18.81964073	29.57474673	874	902	0.86	0.93	0.652123939	1.63E-31	4.97E-27	up
FB_Cluster_1	ENSMUSG00000020469	Myl7	2.728832765	0.820168436	874	902	0.346	0.139	-1.73416883	2.18E-31	6.64E-27	down
FB_Cluster_1	ENSMUSG00000028773	Fabp3	21.93772431	15.54964853	874	902	0.965	0.941	-0.496529204	3.17E-31	9.66E-27	down
FB_Cluster_1	ENSMUSG00000004610	Etfb	4.249252655	1.960457341	874	902	0.49	0.326	-1.115979241	1.65E-30	5.02E-26	down
FB_Cluster_1	ENSMUSG00000060600	Eno3	2.704304194	0.953499813	874	902	0.351	0.183	-1.503854931	3.13E-30	9.54E-26	down
FB_Cluster_1	ENSMUSG00000079017	Ifi27l2a	1.115629359	2.973367908	874	902	0.164	0.408	1.414159389	1.17E-29	3.56E-25	up
FB_Cluster_1	ENSMUSG00000025393	Atp5b	7.685586598	4.737263785	874	902	0.696	0.609	-0.698089687	1.44E-29	4.40E-25	down
FB_Cluster_1	ENSMUSG00000007877	Tcap	3.439610748	1.424594903	874	902	0.418	0.242	-1.27163425	1.49E-29	4.56E-25	down
FB_Cluster_1	ENSMUSG00000035242	Oaz1	3.53278197	1.720488598	874	902	0.47	0.32	-1.037943369	2.34E-29	7.14E-25	down
FB_Cluster_1	ENSMUSG00000038608	Dock10	1.129017484	2.984898682	874	902	0.161	0.401	1.402534689	7.35E-29	2.24E-24	up
FB_Cluster_1	ENSMUSG00000036751	Cox6b1	6.179014647	3.388814248	874	902	0.645	0.475	-0.86657701	2.52E-28	7.68E-24	down
FB_Cluster_1	ENSMUSG00000026568	Mpc2	4.665612312	2.336916562	874	902	0.546	0.368	-0.997429395	3.72E-28	1.13E-23	down
FB_Cluster_1	ENSMUSG00000020153	Ndufs7	3.225225011	1.308044861	874	902	0.405	0.229	-1.301922235	3.78E-28	1.15E-23	down
FB_Cluster_1	ENSMUSG00000030695	Aldoa	5.156010032	2.799704975	874	902	0.562	0.431	-0.880956714	6.46E-28	1.97E-23	down
FB_Cluster_1	ENSMUSG00000027673	Ndufb5	4.045164067	1.943618476	874	902	0.489	0.315	-1.057414605	1.58E-27	4.82E-23	down
FB_Cluster_1	ENSMUSG00000036199	Ndufa13	6.109126212	3.500798403	874	902	0.645	0.513	-0.803264466	2.16E-27	6.58E-23	down
FB_Cluster_1	ENSMUSG00000000563	Atp5pb	5.512560428	3.04613563	874	902	0.597	0.439	-0.855721196	5.55E-27	1.69E-22	down
FB_Cluster_1	ENSMUSG00000009863	Sdhb	3.288495877	1.497414485	874	902	0.415	0.268	-1.134901774	1.43E-26	4.35E-22	down
FB_Cluster_1	ENSMUSG00000044894	Uqcrq	5.694218824	3.241312745	874	902	0.603	0.465	-0.812900534	2.02E-26	6.17E-22	down
FB_Cluster_1	ENSMUSG00000019899	Lama2	21.30869045	30.58587767	874	902	0.905	0.929	0.521421688	3.40E-26	1.04E-21	up
FB_Cluster_1	ENSMUSG00000026222	Sp100	1.059497279	2.481893092	874	902	0.16	0.381	1.227983056	1.06E-25	3.24E-21	up
FB_Cluster_1	ENSMUSG00000027602	Map1lc3a	2.856379872	1.310362271	874	902	0.37	0.245	-1.124162545	1.28E-25	3.89E-21	down
FB_Cluster_1	ENSMUSG00000029561	Oasl2	0.217489025	1.064578	874	902	0.031	0.177	2.290739471	1.32E-25	4.03E-21	up
FB_Cluster_1	ENSMUSG00000031059	Ndufb11	4.459261169	2.314438135	874	902	0.507	0.364	-0.946112717	2.53E-25	7.71E-21	down
FB_Cluster_1	ENSMUSG00000090272	Mndal	0.884777094	2.376939321	874	902	0.146	0.361	1.425616779	8.42E-25	2.57E-20	up
FB_Cluster_1	ENSMUSG00000002379	Ndufa11	4.073806809	1.963986672	874	902	0.487	0.316	-1.052554384	8.46E-25	2.58E-20	down
FB_Cluster_1	ENSMUSG00000027447	Cst3	12.72492842	7.520004428	874	902	0.778	0.684	-0.758844277	1.02E-24	3.11E-20	down
FB_Cluster_1	ENSMUSG00000003970	Rpl8	4.316008615	2.394981291	874	902	0.533	0.4	-0.849656548	1.72E-24	5.25E-20	down
FB_Cluster_1	ENSMUSG00000063694	Cycs	6.041942507	3.471357704	874	902	0.635	0.483	-0.79949474	1.96E-24	5.96E-20	down
FB_Cluster_1	ENSMUSG00000026208	Des	3.669989612	1.773629224	874	902	0.468	0.282	-1.049029504	2.45E-24	7.48E-20	down
FB_Cluster_1	ENSMUSG00000057335	Cep170	1.712585154	2.906034544	874	902	0.243	0.457	0.762841534	1.06E-23	3.24E-19	up
FB_Cluster_1	ENSMUSG00000021520	Uqcrb	6.084867211	3.772017073	874	902	0.627	0.504	-0.689875036	1.88E-23	5.72E-19	down
FB_Cluster_1	ENSMUSG00000019990	Pde7b	1.022562849	2.178316539	874	902	0.118	0.303	1.090949245	3.41E-23	1.04E-18	up
FB_Cluster_1	ENSMUSG00000009633	G0s2	5.149930102	2.546508586	874	902	0.493	0.373	-1.016003631	5.08E-23	1.55E-18	down
FB_Cluster_1	ENSMUSG00000053279	Aldh1a1	4.010682145	7.971991102	874	902	0.442	0.661	0.991074592	6.12E-23	1.87E-18	up
FB_Cluster_1	ENSMUSG00000047215	Rpl9	5.372915972	3.120049396	874	902	0.59	0.449	-0.784117018	7.41E-23	2.26E-18	down
FB_Cluster_1	ENSMUSG00000071415	Rpl23	6.194450175	3.890698975	874	902	0.606	0.538	-0.67093308	8.24E-23	2.51E-18	down
FB_Cluster_1	ENSMUSG00000031320	Rps4x	4.371146147	2.383524702	874	902	0.507	0.381	-0.874887516	9.44E-23	2.88E-18	down
FB_Cluster_1	ENSMUSG00000008136	Fhl2	3.211028891	1.592110399	874	902	0.416	0.283	-1.012049584	1.22E-22	3.71E-18	down
FB_Cluster_1	ENSMUSG00000044533	Rps2	4.971037781	2.972105815	874	902	0.579	0.46	-0.742042069	1.81E-22	5.50E-18	down
FB_Cluster_1	ENSMUSG00000017404	Rpl19	5.652226987	3.413443465	874	902	0.587	0.491	-0.727574806	1.87E-22	5.71E-18	down
FB_Cluster_1	ENSMUSG00000033938	Ndufb7	3.784572042	1.999961388	874	902	0.452	0.33	-0.920124008	4.05E-22	1.23E-17	down
FB_Cluster_1	ENSMUSG00000014313	Cox6c	11.73897348	8.093826864	874	902	0.84	0.761	-0.536406829	4.90E-22	1.49E-17	down
FB_Cluster_1	ENSMUSG00000023150	Ivns1abp	2.218218214	1.110369959	874	902	0.324	0.227	-0.998295967	4.97E-22	1.52E-17	down
FB_Cluster_1	ENSMUSG00000023175	Bsg	3.268770984	1.816530159	874	902	0.407	0.324	-0.847527701	8.16E-22	2.49E-17	down
FB_Cluster_1	ENSMUSG00000032330	Cox7a2	5.230791511	3.037510944	874	902	0.561	0.43	-0.784119747	9.47E-22	2.89E-17	down
FB_Cluster_1	ENSMUSG00000008682	Rpl10	3.995353683	2.255827459	874	902	0.474	0.367	-0.824638652	1.15E-21	3.51E-17	down
FB_Cluster_1	ENSMUSG00000070327	Rnf213	0.737659125	2.265357006	874	902	0.114	0.3	1.618580346	1.36E-21	4.14E-17	up
FB_Cluster_1	ENSMUSG00000040033	Stat2	0.419720112	1.39934472	874	902	0.069	0.229	1.737011312	1.53E-21	4.67E-17	up
FB_Cluster_1	ENSMUSG00000038462	Uqcrfs1	3.513193747	1.713318903	874	902	0.449	0.268	-1.035946295	1.61E-21	4.89E-17	down
FB_Cluster_1	ENSMUSG00000059291	Rpl11	4.070923909	2.282113864	874	902	0.481	0.367	-0.834957703	2.24E-21	6.83E-17	down
FB_Cluster_1	ENSMUSG00000064354	mt-Co2	39.92261169	30.9288955	874	902	0.992	0.994	-0.368249738	2.64E-21	8.03E-17	down
FB_Cluster_1	ENSMUSG00000006356	Crip2	4.292317409	2.560109656	874	902	0.522	0.409	-0.745528418	2.91E-21	8.88E-17	down
FB_Cluster_1	ENSMUSG00000012848	Rps5	3.768604213	2.104623876	874	902	0.453	0.36	-0.840437595	3.16E-21	9.63E-17	down
FB_Cluster_1	ENSMUSG00000059070	Rpl18	4.272645953	2.448512689	874	902	0.523	0.385	-0.803198947	3.18E-21	9.69E-17	down
FB_Cluster_1	ENSMUSG00000037605	Adgrl3	2.320562488	4.405964648	874	902	0.262	0.481	0.924953947	8.57E-21	2.61E-16	up
FB_Cluster_1	ENSMUSG00000028081	Rps3a1	5.173805058	3.044107082	874	902	0.556	0.439	-0.765187079	8.80E-21	2.68E-16	down
FB_Cluster_1	ENSMUSG00000070469	Adamtsl3	1.476568413	2.791747637	874	902	0.195	0.396	0.918874305	9.26E-21	2.82E-16	up
FB_Cluster_1	ENSMUSG00000002100	Mybpc3	3.204005328	1.630523912	874	902	0.43	0.277	-0.974497497	9.48E-21	2.89E-16	down
FB_Cluster_1	ENSMUSG00000032826	Ank2	5.167126647	8.417130403	874	902	0.524	0.728	0.703955443	2.06E-20	6.28E-16	up
FB_Cluster_1	ENSMUSG00000042045	Sln	1.411637954	0.365368917	874	902	0.2	0.065	-1.949651704	2.51E-20	7.66E-16	down
FB_Cluster_1	ENSMUSG00000055065	Ddx17	2.390147007	3.103057043	874	902	0.324	0.506	0.376576997	3.26E-20	9.94E-16	up
FB_Cluster_1	ENSMUSG00000037926	Ssh2	6.215052398	10.22678255	874	902	0.58	0.763	0.718504764	3.32E-20	1.01E-15	up
FB_Cluster_1	ENSMUSG00000034118	Tpst1	1.212537761	1.974066194	874	902	0.182	0.353	0.703094794	4.53E-20	1.38E-15	up
FB_Cluster_1	ENSMUSG00000002107	Celf2	28.92231598	38.57701691	874	902	0.944	0.956	0.415557256	5.62E-20	1.71E-15	up
FB_Cluster_1	ENSMUSG00000038717	Atp5l	6.53403979	4.131634954	874	902	0.633	0.525	-0.66124961	9.33E-20	2.84E-15	down
FB_Cluster_1	ENSMUSG00000041453	Rpl21	4.406467934	2.711883133	874	902	0.501	0.419	-0.700307241	1.09E-19	3.33E-15	down
FB_Cluster_1	ENSMUSG00000029019	Nppb	1.43580733	0.369256037	874	902	0.2	0.068	-1.95887858	1.31E-19	3.99E-15	down
FB_Cluster_1	ENSMUSG00000064357	mt-Atp6	33.26488821	25.14198108	874	902	0.979	0.977	-0.403900452	1.38E-19	4.19E-15	down
FB_Cluster_1	ENSMUSG00000062328	Rpl17	3.300333535	1.989838358	874	902	0.435	0.353	-0.729931803	2.27E-19	6.91E-15	down
FB_Cluster_1	ENSMUSG00000024066	Xdh	2.183003528	3.607327729	874	902	0.289	0.498	0.724589944	3.00E-19	9.14E-15	up
FB_Cluster_1	ENSMUSG00000028648	Ndufs5	3.447092812	1.868788912	874	902	0.439	0.318	-0.883241179	3.05E-19	9.30E-15	down
FB_Cluster_1	ENSMUSG00000034422	Parp14	0.693395513	1.320832051	874	902	0.101	0.243	0.929597803	3.95E-19	1.20E-14	up
FB_Cluster_1	ENSMUSG00000019505	Ubb	4.132470593	2.738523713	874	902	0.499	0.448	-0.593588411	4.39E-19	1.34E-14	down
FB_Cluster_1	ENSMUSG00000026748	Plxdc2	8.917495249	13.70642073	874	902	0.714	0.833	0.620135778	6.48E-19	1.98E-14	up
FB_Cluster_1	ENSMUSG00000040212	Emp3	3.666294619	2.12152704	874	902	0.405	0.348	-0.789191006	6.58E-19	2.01E-14	down
FB_Cluster_1	ENSMUSG00000019179	Mdh2	3.172764728	1.77830217	874	902	0.412	0.307	-0.835204401	8.51E-19	2.59E-14	down
FB_Cluster_1	ENSMUSG00000003380	Rabac1	3.234763163	1.942988974	874	902	0.43	0.339	-0.735352723	9.01E-19	2.75E-14	down
FB_Cluster_1	ENSMUSG00000023089	Ndufa5	5.085771599	3.244809231	874	902	0.548	0.455	-0.648316917	1.43E-18	4.36E-14	down
FB_Cluster_1	ENSMUSG00000044749	Abca6	3.956537451	7.014704852	874	902	0.45	0.649	0.826128093	1.70E-18	5.19E-14	up
FB_Cluster_1	ENSMUSG00000090862	Rps13	3.967928234	2.345090419	874	902	0.476	0.363	-0.758717223	1.74E-18	5.31E-14	down
FB_Cluster_1	ENSMUSG00000061904	Slc25a3	4.884706272	3.13239789	874	902	0.563	0.479	-0.640987809	1.85E-18	5.65E-14	down
FB_Cluster_1	ENSMUSG00000020022	Ndufa12	2.132919264	1.01435128	874	902	0.296	0.193	-1.072197416	2.31E-18	7.05E-14	down
FB_Cluster_1	ENSMUSG00000022450	Ndufa6	3.635555936	1.973094663	874	902	0.447	0.32	-0.881682385	2.62E-18	7.98E-14	down
FB_Cluster_1	ENSMUSG00000021910	Nisch	1.919770484	2.712707077	874	902	0.276	0.45	0.498777464	2.74E-18	8.35E-14	up
FB_Cluster_1	ENSMUSG00000032294	Pkm	1.83262393	0.972628364	874	902	0.28	0.198	-0.913880593	3.14E-18	9.58E-14	down
FB_Cluster_1	ENSMUSG00000003119	Cdk12	2.220938994	2.929536937	874	902	0.293	0.459	0.399487164	3.52E-18	1.07E-13	up
FB_Cluster_1	ENSMUSG00000020475	Pgam2	2.154687911	0.945616508	874	902	0.305	0.167	-1.188066191	4.10E-18	1.25E-13	down
FB_Cluster_1	ENSMUSG00000015656	Hspa8	4.490645715	3.152435613	874	902	0.529	0.486	-0.510442365	7.26E-18	2.21E-13	down
FB_Cluster_1	ENSMUSG00000027288	Zfp106	2.276168561	1.369043952	874	902	0.32	0.268	-0.733396641	7.50E-18	2.29E-13	down
FB_Cluster_1	ENSMUSG00000053477	Tcf4	11.34399237	15.99675746	874	902	0.78	0.863	0.495847335	8.33E-18	2.54E-13	up
FB_Cluster_1	ENSMUSG00000018770	Atp5g3	4.862399398	3.042037308	874	902	0.553	0.439	-0.6766128	9.30E-18	2.84E-13	down
FB_Cluster_1	ENSMUSG00000050708	Ftl1	4.9429833	3.305532984	874	902	0.542	0.484	-0.580484664	1.13E-17	3.43E-13	down
FB_Cluster_1	ENSMUSG00000074218	Cox7a1	4.129734661	2.438068344	874	902	0.471	0.379	-0.760286283	1.43E-17	4.37E-13	down
FB_Cluster_1	ENSMUSG00000033237	Arid2	1.16804849	1.839276541	874	902	0.175	0.327	0.654993171	1.55E-17	4.72E-13	up
FB_Cluster_1	ENSMUSG00000039997	Ifi203	2.038857248	3.802379225	874	902	0.261	0.46	0.89910884	1.55E-17	4.74E-13	up
FB_Cluster_1	ENSMUSG00000022551	Cyc1	2.867733496	1.575610275	874	902	0.395	0.276	-0.863958974	1.59E-17	4.84E-13	down
FB_Cluster_1	ENSMUSG00000062980	Cped1	6.969621695	10.39007857	874	902	0.627	0.794	0.576047495	2.02E-17	6.16E-13	up
FB_Cluster_1	ENSMUSG00000048537	Phldb1	1.045458653	1.460486312	874	902	0.162	0.293	0.48227362	3.85E-17	1.17E-12	up
FB_Cluster_1	ENSMUSG00000058997	Vwa8	0.914045506	1.384606625	874	902	0.149	0.282	0.599084624	4.29E-17	1.31E-12	up
FB_Cluster_1	ENSMUSG00000021771	Vdac2	1.770832898	0.7317096	874	902	0.254	0.146	-1.274969303	4.92E-17	1.50E-12	down
FB_Cluster_1	ENSMUSG00000005161	Prdx2	1.802963809	0.907896969	874	902	0.269	0.183	-0.989691067	5.06E-17	1.54E-12	down
FB_Cluster_1	ENSMUSG00000062908	Acadm	3.617504971	2.365214851	874	902	0.443	0.386	-0.613002644	5.77E-17	1.76E-12	down
FB_Cluster_1	ENSMUSG00000015568	Lpl	10.19717066	7.084218322	874	902	0.743	0.677	-0.525482117	5.99E-17	1.83E-12	down
FB_Cluster_1	ENSMUSG00000030074	Gxylt2	1.066774165	2.07103794	874	902	0.165	0.334	0.957033617	6.61E-17	2.02E-12	up
FB_Cluster_1	ENSMUSG00000039891	Txlnb	1.647195269	0.613982502	874	902	0.238	0.116	-1.423594774	6.84E-17	2.08E-12	down
FB_Cluster_1	ENSMUSG00000025488	Cox8b	6.128032893	3.964554801	874	902	0.64	0.511	-0.628252326	7.29E-17	2.22E-12	down
FB_Cluster_1	ENSMUSG00000001768	Rin2	0.877516318	1.899498835	874	902	0.136	0.3	1.114032521	8.03E-17	2.45E-12	up
FB_Cluster_1	ENSMUSG00000032383	Ppib	3.703174242	2.410148387	874	902	0.457	0.394	-0.61961956	8.14E-17	2.48E-12	down
FB_Cluster_1	ENSMUSG00000026553	Copa	1.914303133	2.536220363	874	902	0.271	0.426	0.405842321	8.58E-17	2.62E-12	up
FB_Cluster_1	ENSMUSG00000034160	Ogt	2.073056797	3.178080094	874	902	0.3	0.487	0.616371643	8.89E-17	2.71E-12	up
FB_Cluster_1	ENSMUSG00000034801	Sos2	1.256275855	1.93655422	874	902	0.183	0.336	0.624298268	9.14E-17	2.79E-12	up
FB_Cluster_1	ENSMUSG00000060636	Rpl35a	3.545091622	2.735805849	874	902	0.421	0.438	-0.373845025	9.71E-17	2.96E-12	down
FB_Cluster_1	ENSMUSG00000021047	Nova1	0.727331101	1.547934224	874	902	0.109	0.255	1.089554853	1.01E-16	3.08E-12	up
FB_Cluster_1	ENSMUSG00000039852	Rere	2.560961592	3.69256953	874	902	0.348	0.534	0.527922207	1.04E-16	3.16E-12	up
FB_Cluster_1	ENSMUSG00000067274	Rplp0	3.233084553	2.113871528	874	902	0.421	0.361	-0.612999914	1.07E-16	3.27E-12	down
FB_Cluster_1	ENSMUSG00000052920	Prkg1	7.512059482	12.09099274	874	902	0.559	0.738	0.686645038	1.12E-16	3.40E-12	up
FB_Cluster_1	ENSMUSG00000033487	Fndc3a	2.375026286	3.417590406	874	902	0.322	0.504	0.525017491	1.19E-16	3.63E-12	up
FB_Cluster_1	ENSMUSG00000027248	Pdia3	4.120347954	2.800550716	874	902	0.476	0.435	-0.55703912	1.32E-16	4.02E-12	down
FB_Cluster_1	ENSMUSG00000045128	Rpl18a	4.221833779	2.716179205	874	902	0.516	0.408	-0.636272169	1.34E-16	4.09E-12	down
FB_Cluster_1	ENSMUSG00000041797	Abca9	2.728139076	4.719495152	874	902	0.351	0.552	0.790693036	1.47E-16	4.49E-12	up
FB_Cluster_1	ENSMUSG00000037152	Ndufc1	3.871832513	2.340474491	874	902	0.458	0.363	-0.726191126	1.57E-16	4.80E-12	down
FB_Cluster_1	ENSMUSG00000022136	Dnajc3	2.860151975	1.67803928	874	902	0.354	0.292	-0.769279787	1.69E-16	5.16E-12	down
FB_Cluster_1	ENSMUSG00000028161	Ppp3ca	3.148199381	4.762495192	874	902	0.381	0.579	0.597175191	1.72E-16	5.24E-12	up
FB_Cluster_1	ENSMUSG00000058569	Tmed9	2.347993136	1.519331542	874	902	0.325	0.288	-0.627957957	1.76E-16	5.36E-12	down
FB_Cluster_1	ENSMUSG00000040852	Plekhh2	1.96381717	3.126994757	874	902	0.277	0.463	0.671088852	2.56E-16	7.79E-12	up
FB_Cluster_1	ENSMUSG00000020361	Hspa4	1.7926949	1.137316823	874	902	0.26	0.233	-0.656449403	2.56E-16	7.80E-12	down
FB_Cluster_1	ENSMUSG00000009079	Ewsr1	1.124156449	1.731018153	874	902	0.178	0.327	0.622733035	3.06E-16	9.33E-12	up
FB_Cluster_1	ENSMUSG00000021313	Ryr2	2.40654696	1.337057235	874	902	0.32	0.246	-0.847855402	3.08E-16	9.37E-12	down
FB_Cluster_1	ENSMUSG00000021390	Ogn	7.251903254	4.769057749	874	902	0.635	0.541	-0.604645069	3.74E-16	1.14E-11	down
FB_Cluster_1	ENSMUSG00000019916	P4ha1	3.85120152	2.739844384	874	902	0.479	0.452	-0.491199467	4.01E-16	1.22E-11	down
FB_Cluster_1	ENSMUSG00000040274	Cdk6	0.633073765	1.307413315	874	902	0.101	0.237	1.046152253	4.60E-16	1.40E-11	up
FB_Cluster_1	ENSMUSG00000037710	Cisd1	1.996412736	0.8848692	874	902	0.287	0.163	-1.173783124	4.69E-16	1.43E-11	down
FB_Cluster_1	ENSMUSG00000039103	Nexn	3.082547894	1.7569263	874	902	0.376	0.29	-0.811034325	5.04E-16	1.54E-11	down
FB_Cluster_1	ENSMUSG00000060938	Rpl26	3.489759025	2.180201145	874	902	0.428	0.359	-0.678641344	5.11E-16	1.56E-11	down
FB_Cluster_1	ENSMUSG00000032518	Rpsa	4.304101105	2.693972906	874	902	0.508	0.412	-0.675956594	5.83E-16	1.78E-11	down
FB_Cluster_1	ENSMUSG00000042207	Kdm5b	0.983972795	1.370906593	874	902	0.149	0.267	0.478398563	6.22E-16	1.90E-11	up
FB_Cluster_1	ENSMUSG00000041757	Plekha6	2.262121805	3.403282929	874	902	0.317	0.502	0.589229095	6.77E-16	2.06E-11	up
FB_Cluster_1	ENSMUSG00000026864	Hspa5	7.898505134	4.944810769	874	902	0.619	0.498	-0.675653413	7.10E-16	2.16E-11	down
FB_Cluster_1	ENSMUSG00000020460	Rps27a	4.664495087	3.181092808	874	902	0.538	0.458	-0.552184038	9.05E-16	2.76E-11	down
FB_Cluster_1	ENSMUSG00000028410	Dnaja1	2.354362359	1.290609743	874	902	0.315	0.236	-0.867233057	1.17E-15	3.57E-11	down
FB_Cluster_1	ENSMUSG00000030432	Rpl28	4.015339031	2.5511416	874	902	0.471	0.388	-0.654358207	1.20E-15	3.65E-11	down
FB_Cluster_1	ENSMUSG00000028483	Snapc3	0.965360976	1.254695678	874	902	0.15	0.257	0.378162614	1.22E-15	3.71E-11	up
FB_Cluster_1	ENSMUSG00000033713	Foxn3	1.968106959	3.070730817	874	902	0.269	0.447	0.641747102	1.24E-15	3.77E-11	up
FB_Cluster_1	ENSMUSG00000037062	Sh3glb1	2.798411439	2.03025278	874	902	0.378	0.365	-0.462929223	1.33E-15	4.05E-11	down
FB_Cluster_1	ENSMUSG00000046718	Bst2	0.820172464	1.5192422	874	902	0.122	0.262	0.88927174	1.33E-15	4.05E-11	up
FB_Cluster_1	ENSMUSG00000008668	Rps18	3.238931922	1.916957661	874	902	0.43	0.331	-0.756668956	1.72E-15	5.23E-11	down
FB_Cluster_1	ENSMUSG00000024900	Cpt1a	0.495503931	1.002084021	874	902	0.084	0.204	1.015887904	1.75E-15	5.34E-11	up
FB_Cluster_1	ENSMUSG00000025290	Rps24	5.493117069	3.818478632	874	902	0.565	0.519	-0.52461557	1.83E-15	5.56E-11	down
FB_Cluster_1	ENSMUSG00000021224	Numb	1.251713195	2.098373611	874	902	0.191	0.35	0.745321032	1.86E-15	5.65E-11	up
FB_Cluster_1	ENSMUSG00000049775	Tmsb4x	4.640117276	3.323892144	874	902	0.507	0.477	-0.481275388	1.91E-15	5.81E-11	down
FB_Cluster_1	ENSMUSG00000024085	Man2a1	5.383868238	3.650162657	874	902	0.515	0.483	-0.560669621	2.05E-15	6.25E-11	down
FB_Cluster_1	ENSMUSG00000033880	Lgals3bp	0.390807395	0.816374973	874	902	0.064	0.174	1.062581787	2.29E-15	6.99E-11	up
FB_Cluster_1	ENSMUSG00000062981	Mrpl42	2.153958576	0.924233126	874	902	0.288	0.152	-1.22057269	2.34E-15	7.14E-11	down
FB_Cluster_1	ENSMUSG00000037563	Rps16	3.65951239	2.575204902	874	902	0.451	0.408	-0.506947603	2.88E-15	8.76E-11	down
FB_Cluster_1	ENSMUSG00000040987	Mill2	1.576988265	2.465464098	874	902	0.239	0.406	0.644654354	3.10E-15	9.45E-11	up
FB_Cluster_1	ENSMUSG00000021606	Ndufs6	3.033750553	1.713038022	874	902	0.375	0.278	-0.824508631	3.35E-15	1.02E-10	down
FB_Cluster_1	ENSMUSG00000020163	Uqcr11	5.654840653	3.853330915	874	902	0.597	0.513	-0.553368358	3.36E-15	1.02E-10	down
FB_Cluster_1	ENSMUSG00000011171	Vipr2	0.354432881	0.913996469	874	902	0.059	0.177	1.366426994	3.72E-15	1.13E-10	up
FB_Cluster_1	ENSMUSG00000026688	Mgst3	2.044145832	0.976195215	874	902	0.288	0.17	-1.066179334	3.88E-15	1.18E-10	down
FB_Cluster_1	ENSMUSG00000036461	Elf1	1.312321043	2.045058889	874	902	0.184	0.334	0.6399823	3.95E-15	1.20E-10	up
FB_Cluster_1	ENSMUSG00000063316	Rpl27	2.722541899	1.781284834	874	902	0.347	0.312	-0.612008024	4.19E-15	1.28E-10	down
FB_Cluster_1	ENSMUSG00000001289	Pfdn5	1.835596281	0.845550459	874	902	0.262	0.161	-1.118194013	4.20E-15	1.28E-10	down
FB_Cluster_1	ENSMUSG00000006586	Runx1t1	1.698064475	2.718506022	874	902	0.229	0.397	0.678890895	4.43E-15	1.35E-10	up
FB_Cluster_1	ENSMUSG00000028116	Myoz2	1.899913192	0.905618065	874	902	0.268	0.167	-1.068875498	4.54E-15	1.38E-10	down
FB_Cluster_1	ENSMUSG00000028964	Park7	1.631768049	0.833992646	874	902	0.227	0.169	-0.968244864	4.71E-15	1.44E-10	down
FB_Cluster_1	ENSMUSG00000058546	Rpl23a	2.835329794	1.732322693	874	902	0.376	0.299	-0.71077646	5.08E-15	1.55E-10	down
FB_Cluster_1	ENSMUSG00000026872	Zeb2	6.311320226	9.296971222	874	902	0.58	0.755	0.558811624	5.45E-15	1.66E-10	up
FB_Cluster_1	ENSMUSG00000059447	Hadhb	3.244965184	2.358674884	874	902	0.426	0.402	-0.46020972	5.46E-15	1.66E-10	down
FB_Cluster_1	ENSMUSG00000028494	Plin2	0.516006049	1.065083099	874	902	0.086	0.207	1.045361999	5.54E-15	1.69E-10	up
FB_Cluster_1	ENSMUSG00000028495	Rps6	2.041792793	1.198436528	874	902	0.289	0.227	-0.768633243	5.56E-15	1.69E-10	down
FB_Cluster_1	ENSMUSG00000024099	Ndufv2	2.552993832	1.417415094	874	902	0.351	0.257	-0.848882464	6.46E-15	1.97E-10	down
FB_Cluster_1	ENSMUSG00000054889	Dsp	1.790289947	0.835518861	874	902	0.253	0.156	-1.09935688	6.65E-15	2.03E-10	down
FB_Cluster_1	ENSMUSG00000031555	Adam9	1.200727081	1.630965376	874	902	0.192	0.318	0.441786191	7.14E-15	2.17E-10	up
FB_Cluster_1	ENSMUSG00000061477	Rps7	3.757295308	2.336397704	874	902	0.447	0.367	-0.685385287	7.38E-15	2.25E-10	down
FB_Cluster_1	ENSMUSG00000001441	Npepps	1.623653785	2.175691858	874	902	0.241	0.381	0.422207662	8.54E-15	2.60E-10	up
FB_Cluster_1	ENSMUSG00000017421	Zfp207	1.026446099	1.46815818	874	902	0.167	0.29	0.516307259	8.59E-15	2.62E-10	up
FB_Cluster_1	ENSMUSG00000026987	Baz2b	4.046831458	5.27532082	874	902	0.467	0.647	0.382457768	9.13E-15	2.78E-10	up
FB_Cluster_1	ENSMUSG00000025794	Rpl14	2.188031801	1.230018749	874	902	0.308	0.233	-0.830902049	9.23E-15	2.81E-10	down
FB_Cluster_1	ENSMUSG00000029817	Tra2a	1.608588047	2.108119871	874	902	0.227	0.363	0.390140748	9.36E-15	2.85E-10	up
FB_Cluster_1	ENSMUSG00000061315	Naca	2.257108174	1.219538021	874	902	0.32	0.221	-0.888086449	9.82E-15	2.99E-10	down
FB_Cluster_1	ENSMUSG00000030231	Plekha5	2.746421758	3.731851839	874	902	0.357	0.527	0.442324647	1.16E-14	3.54E-10	up
FB_Cluster_1	ENSMUSG00000117647	Gm49969	0.832558369	1.328621746	874	902	0.118	0.236	0.674242415	1.29E-14	3.93E-10	up
FB_Cluster_1	ENSMUSG00000005873	Reep5	2.281689791	1.271580416	874	902	0.326	0.235	-0.843429735	1.33E-14	4.05E-10	down
FB_Cluster_1	ENSMUSG00000030527	Crtc3	2.430492564	3.15626606	874	902	0.319	0.476	0.376956455	1.34E-14	4.07E-10	up
FB_Cluster_1	ENSMUSG00000022053	Ebf2	6.847696479	9.690483307	874	902	0.59	0.765	0.500943684	1.36E-14	4.15E-10	up
FB_Cluster_1	ENSMUSG00000033306	Lpp	3.683277636	4.77045965	874	902	0.431	0.604	0.373129207	1.65E-14	5.04E-10	up
FB_Cluster_1	ENSMUSG00000037652	Phc3	1.108627475	1.45788065	874	902	0.174	0.285	0.395066778	1.67E-14	5.10E-10	up
FB_Cluster_1	ENSMUSG00000015733	Capza2	1.148675048	0.656363612	874	902	0.178	0.152	-0.807309369	1.75E-14	5.34E-10	down
FB_Cluster_1	ENSMUSG00000048758	Rpl29	1.909749911	1.100191635	874	902	0.273	0.211	-0.795573301	1.78E-14	5.43E-10	down
FB_Cluster_1	ENSMUSG00000026664	Phyh	1.618272498	0.718328858	874	902	0.232	0.139	-1.171626502	1.88E-14	5.72E-10	down
FB_Cluster_1	ENSMUSG00000070436	Serpinh1	4.044008634	2.857694025	874	902	0.459	0.429	-0.500919813	2.20E-14	6.70E-10	down
FB_Cluster_1	ENSMUSG00000030744	Rps3	2.942570984	1.826863067	874	902	0.38	0.308	-0.687678777	2.31E-14	7.04E-10	down
FB_Cluster_1	ENSMUSG00000028413	B4galt1	1.891489274	2.693402131	874	902	0.26	0.411	0.50988434	2.54E-14	7.73E-10	up
FB_Cluster_1	ENSMUSG00000027210	Meis2	2.651487173	3.61056785	874	902	0.324	0.487	0.445409532	2.58E-14	7.86E-10	up
FB_Cluster_1	ENSMUSG00000027803	Wwtr1	1.477403875	1.919891597	874	902	0.216	0.345	0.377938083	2.58E-14	7.87E-10	up
FB_Cluster_1	ENSMUSG00000020372	Rack1	2.264845513	1.486200199	874	902	0.315	0.275	-0.607750807	2.78E-14	8.48E-10	down
FB_Cluster_1	ENSMUSG00000026034	Clk1	1.454122474	1.943393442	874	902	0.228	0.36	0.418404243	2.84E-14	8.65E-10	up
FB_Cluster_1	ENSMUSG00000032253	Phip	2.139614744	3.045920645	874	902	0.291	0.455	0.509507244	2.87E-14	8.76E-10	up
FB_Cluster_1	ENSMUSG00000053093	Myh7	0.956154448	0.245775592	874	902	0.143	0.048	-1.959466025	2.93E-14	8.94E-10	down
FB_Cluster_1	ENSMUSG00000044471	Lncpint	4.636784451	7.095374984	874	902	0.51	0.687	0.613743488	2.97E-14	9.06E-10	up
FB_Cluster_1	ENSMUSG00000032377	Plscr4	2.03161299	3.028688794	874	902	0.283	0.45	0.576044364	3.04E-14	9.28E-10	up
FB_Cluster_1	ENSMUSG00000043556	Fbxl7	4.275979535	7.17951264	874	902	0.396	0.579	0.747617321	3.14E-14	9.58E-10	up
FB_Cluster_1	ENSMUSG00000068245	Phf11d	0.160373464	0.435759564	874	902	0.025	0.102	1.441528616	3.27E-14	9.96E-10	up
FB_Cluster_1	ENSMUSG00000052337	Immt	1.940522055	1.164299677	874	902	0.287	0.231	-0.73693283	3.34E-14	1.02E-09	down
FB_Cluster_1	ENSMUSG00000005610	Eif4g2	2.188778923	1.687573668	874	902	0.305	0.315	-0.375156186	3.45E-14	1.05E-09	down
FB_Cluster_1	ENSMUSG00000086782	E130102H24Rik	1.724985856	2.423990967	874	902	0.252	0.401	0.490775673	3.45E-14	1.05E-09	up
FB_Cluster_1	ENSMUSG00000020774	Aspa	1.249637731	1.888828502	874	902	0.162	0.296	0.595942731	3.67E-14	1.12E-09	up
FB_Cluster_1	ENSMUSG00000024164	C3	5.157900469	3.003010616	874	902	0.443	0.365	-0.780354288	3.71E-14	1.13E-09	down
FB_Cluster_1	ENSMUSG00000033392	Clasp2	1.969263331	2.88451001	874	902	0.277	0.439	0.550646984	4.34E-14	1.32E-09	up
FB_Cluster_1	ENSMUSG00000073489	Ifi204	0.52390121	1.056720683	874	902	0.085	0.201	1.012088559	4.40E-14	1.34E-09	up
FB_Cluster_1	ENSMUSG00000108563	Gm44686	1.04135788	1.675724826	874	902	0.16	0.295	0.686266859	4.48E-14	1.36E-09	up
FB_Cluster_1	ENSMUSG00000031093	Dock11	1.000221177	1.668973782	874	902	0.156	0.294	0.738584444	4.50E-14	1.37E-09	up
FB_Cluster_1	ENSMUSG00000062901	Klhl24	1.162333129	1.512445325	874	902	0.174	0.283	0.379830649	4.51E-14	1.38E-09	up
FB_Cluster_1	ENSMUSG00000023952	Gtpbp2	0.491863241	0.799371069	874	902	0.081	0.174	0.700495304	4.61E-14	1.40E-09	up
FB_Cluster_1	ENSMUSG00000024646	Cyb5a	2.254138104	1.645468719	874	902	0.311	0.305	-0.454053634	4.65E-14	1.42E-09	down
FB_Cluster_1	ENSMUSG00000063558	Aox1	0.783964302	1.293704225	874	902	0.124	0.245	0.722575447	4.68E-14	1.43E-09	up
FB_Cluster_1	ENSMUSG00000041891	Lman1	1.582978851	1.071226951	874	902	0.238	0.22	-0.563334282	4.88E-14	1.49E-09	down
FB_Cluster_1	ENSMUSG00000036568	Bicral	0.761047794	1.185227448	874	902	0.12	0.235	0.639037143	4.89E-14	1.49E-09	up
FB_Cluster_1	ENSMUSG00000042116	Vwa1	1.016627304	0.784157382	874	902	0.152	0.176	-0.374533678	5.54E-14	1.69E-09	down
FB_Cluster_1	ENSMUSG00000093765	Gm20658	0.312152683	0.937633882	874	902	0.048	0.155	1.586464593	5.84E-14	1.78E-09	up
FB_Cluster_1	ENSMUSG00000038546	Ranbp9	1.813772507	2.370363446	874	902	0.253	0.39	0.38609609	6.02E-14	1.84E-09	up
FB_Cluster_1	ENSMUSG00000037876	Jmjd1c	2.503541347	3.410214036	874	902	0.338	0.5	0.445876687	6.10E-14	1.86E-09	up
FB_Cluster_1	ENSMUSG00000005621	Zfp592	1.749650582	1.355307116	874	902	0.246	0.269	-0.368423037	6.36E-14	1.94E-09	down
FB_Cluster_1	ENSMUSG00000058135	Gstm1	1.917245634	1.21490957	874	902	0.271	0.234	-0.658142753	6.59E-14	2.01E-09	down
FB_Cluster_1	ENSMUSG00000079523	Tmsb10	1.039101007	1.665035994	874	902	0.161	0.296	0.680165275	7.31E-14	2.23E-09	up
FB_Cluster_1	ENSMUSG00000022377	Asap1	3.301045748	4.614114331	874	902	0.404	0.578	0.483118183	7.41E-14	2.26E-09	up
FB_Cluster_1	ENSMUSG00000060743	H3f3a	2.277406273	1.761310989	874	902	0.317	0.325	-0.370723455	7.80E-14	2.38E-09	down
FB_Cluster_1	ENSMUSG00000002222	Rmnd5a	0.80998358	1.259506128	874	902	0.113	0.224	0.636830012	7.83E-14	2.39E-09	up
FB_Cluster_1	ENSMUSG00000056629	Fkbp2	0.993656469	0.637028341	874	902	0.154	0.146	-0.641308334	8.75E-14	2.67E-09	down
FB_Cluster_1	ENSMUSG00000031447	Lamp1	3.017271351	2.202601633	874	902	0.399	0.381	-0.454018173	8.86E-14	2.70E-09	down
FB_Cluster_1	ENSMUSG00000047675	Rps8	7.093387942	4.911067288	874	902	0.632	0.557	-0.530429224	9.01E-14	2.75E-09	down
FB_Cluster_1	ENSMUSG00000027800	Tm4sf1	1.398920645	1.009554891	874	902	0.198	0.211	-0.470555001	9.69E-14	2.95E-09	down
FB_Cluster_1	ENSMUSG00000001175	Calm1	2.191863694	1.257297091	874	902	0.293	0.231	-0.801783572	1.04E-13	3.17E-09	down
FB_Cluster_1	ENSMUSG00000042548	Asxl1	0.77764946	1.155323649	874	902	0.12	0.227	0.571044534	1.11E-13	3.37E-09	up
FB_Cluster_1	ENSMUSG00000017466	Timp2	3.886564502	2.988794107	874	902	0.438	0.461	-0.378920794	1.15E-13	3.49E-09	down
FB_Cluster_1	ENSMUSG00000027365	Trpm7	2.309651305	3.024269641	874	902	0.319	0.471	0.388896955	1.16E-13	3.53E-09	up
FB_Cluster_1	ENSMUSG00000035161	Ints6	0.834734418	1.277924334	874	902	0.124	0.235	0.614353322	1.33E-13	4.05E-09	up
FB_Cluster_1	ENSMUSG00000003847	Nfat5	3.238072577	4.29632671	874	902	0.403	0.575	0.40795741	1.36E-13	4.14E-09	up
FB_Cluster_1	ENSMUSG00000042747	Krtcap2	1.886488459	1.140177125	874	902	0.264	0.218	-0.726395258	1.41E-13	4.30E-09	down
FB_Cluster_1	ENSMUSG00000021290	Atp5mpl	3.234280635	2.169877058	874	902	0.404	0.357	-0.575809681	1.42E-13	4.33E-09	down
FB_Cluster_1	ENSMUSG00000020700	Map3k3	1.096338565	1.646630164	874	902	0.177	0.307	0.586779194	1.44E-13	4.40E-09	up
FB_Cluster_1	ENSMUSG00000024983	Vti1a	1.776211343	2.367924694	874	902	0.243	0.379	0.414799653	1.48E-13	4.52E-09	up
FB_Cluster_1	ENSMUSG00000018076	Med13l	1.278156087	1.765989091	874	902	0.199	0.325	0.466381226	1.49E-13	4.54E-09	up
FB_Cluster_1	ENSMUSG00000024913	Lrp5	0.644892117	0.929589759	874	902	0.103	0.196	0.527467837	1.69E-13	5.17E-09	up
FB_Cluster_1	ENSMUSG00000086507	Adap2os	0.845225731	1.368664124	874	902	0.126	0.245	0.695294582	1.73E-13	5.27E-09	up
FB_Cluster_1	ENSMUSG00000021458	Aopep	2.295910129	3.304965163	874	902	0.314	0.479	0.52554971	1.78E-13	5.42E-09	up
[truncated: 8,804 more rows]
