# Supplementary material for: Single-cell RNA-seq of heart reveals intercellular communication drivers of myocardial fibrosis in diabetic cardiomyopathy
Source: eLife. 2023 Apr 3;12:e80479. doi: 10.7554/eLife.80479 (PMC10110238; doi:10.7554/eLife.80479)
Supplement: Supplementary file 20. [file elife-80479-supp20.xls]

Supplementary file 20: Unique differentially-expressed genes (uni-DEGs) in each fibroblast subpopulation
Contrast	Cluster	GeneID	GeneName	group_1	group_2	cells_1	cells_2	pct_1	pct_2	log2FC	p_value	p_val_adjust	significance	Symbol
Control-vs-T2DM	FB_Cluster_0	ENSMUSG00000027829	Ccnl1	1.078248648	1.445830103	1078	775	0.198	0.337	0.423174113	1.06E-18	3.24E-14	up	Ccnl1
Control-vs-T2DM	FB_Cluster_0	ENSMUSG00000062604	Srpk2	1.416160854	1.829721129	1078	775	0.24	0.387	0.369615615	1.12E-18	3.41E-14	up	Srpk2
Control-vs-T2DM	FB_Cluster_0	ENSMUSG00000005506	Celf1	1.235378883	1.61757545	1078	775	0.211	0.348	0.388851841	7.50E-18	2.29E-13	up	Celf1
Control-vs-T2DM	FB_Cluster_0	ENSMUSG00000050310	Rictor	0.697355615	1.112997547	1078	775	0.133	0.261	0.674406715	2.70E-17	8.22E-13	up	Rictor
Control-vs-T2DM	FB_Cluster_0	ENSMUSG00000004562	Arhgef40	1.174201096	1.64288482	1078	775	0.219	0.368	0.484516781	6.02E-17	1.83E-12	up	Arhgef40
Control-vs-T2DM	FB_Cluster_0	ENSMUSG00000038773	Kdm3b	0.821714388	1.121406433	1078	775	0.145	0.257	0.448553401	8.22E-17	2.51E-12	up	Kdm3b
Control-vs-T2DM	FB_Cluster_0	ENSMUSG00000033565	Rbfox2	1.854166313	2.411054799	1078	775	0.315	0.472	0.378875815	1.53E-16	4.66E-12	up	Rbfox2
Control-vs-T2DM	FB_Cluster_0	ENSMUSG00000010608	Rbm25	2.139982665	2.848277866	1078	775	0.344	0.517	0.412474022	1.58E-16	4.82E-12	up	Rbm25
Control-vs-T2DM	FB_Cluster_0	ENSMUSG00000068874	Selenbp1	0.882511886	1.33454583	1078	775	0.163	0.293	0.596605869	2.64E-16	8.04E-12	up	Selenbp1
Control-vs-T2DM	FB_Cluster_0	ENSMUSG00000018340	Anxa6	0.651088556	0.971332727	1078	775	0.121	0.231	0.577038745	1.77E-15	5.38E-11	up	Anxa6
Control-vs-T2DM	FB_Cluster_0	ENSMUSG00000026502	Desi2	0.972656827	1.362024613	1078	775	0.171	0.297	0.485707588	2.43E-15	7.40E-11	up	Desi2
Control-vs-T2DM	FB_Cluster_0	ENSMUSG00000078619	Smarcd2	0.371563251	0.513688594	1078	775	0.072	0.145	0.467178819	3.40E-15	1.04E-10	up	Smarcd2
Control-vs-T2DM	FB_Cluster_0	ENSMUSG00000116933	Atp5o	1.06678178	1.581025477	1078	775	0.179	0.314	0.567551543	3.96E-15	1.21E-10	up	Atp5o
Control-vs-T2DM	FB_Cluster_0	ENSMUSG00000024483	Ankhd1	1.875696809	2.532610289	1078	775	0.314	0.476	0.4331785	8.46E-15	2.58E-10	up	Ankhd1
Control-vs-T2DM	FB_Cluster_0	ENSMUSG00000020070	Rufy2	0.809396936	1.047428053	1078	775	0.143	0.24	0.371891355	9.79E-15	2.98E-10	up	Rufy2
Control-vs-T2DM	FB_Cluster_0	ENSMUSG00000011257	Pabpc4	0.572412515	0.86055166	1078	775	0.109	0.212	0.588122209	1.09E-14	3.33E-10	up	Pabpc4
Control-vs-T2DM	FB_Cluster_0	ENSMUSG00000020305	Asb3	1.189932922	1.753618113	1078	775	0.214	0.361	0.559415387	2.10E-14	6.40E-10	up	Asb3
Control-vs-T2DM	FB_Cluster_0	ENSMUSG00000015341	Golga7	0.362080097	0.491744841	1078	775	0.07	0.137	0.441496002	2.76E-14	8.41E-10	up	Golga7
Control-vs-T2DM	FB_Cluster_0	ENSMUSG00000020728	Cep112	1.761205935	2.384641468	1078	775	0.287	0.439	0.437187347	3.86E-14	1.18E-09	up	Cep112
Control-vs-T2DM	FB_Cluster_0	ENSMUSG00000021969	Zdhhc20	0.673404387	0.942042883	1078	775	0.129	0.227	0.484258529	5.36E-14	1.63E-09	up	Zdhhc20
Control-vs-T2DM	FB_Cluster_0	ENSMUSG00000057133	Chd6	1.45259487	2.068788144	1078	775	0.246	0.395	0.510123942	6.76E-14	2.06E-09	up	Chd6
Control-vs-T2DM	FB_Cluster_0	ENSMUSG00000026696	Vamp4	0.704623654	0.953398844	1078	775	0.131	0.228	0.436173549	6.86E-14	2.09E-09	up	Vamp4
Control-vs-T2DM	FB_Cluster_0	ENSMUSG00000033530	Ttc7b	0.404460652	0.563642165	1078	775	0.074	0.15	0.478679471	7.22E-14	2.20E-09	up	Ttc7b
Control-vs-T2DM	FB_Cluster_0	ENSMUSG00000059208	Hnrnpm	0.984134423	1.302314555	1078	775	0.187	0.302	0.404114848	7.66E-14	2.34E-09	up	Hnrnpm
Control-vs-T2DM	FB_Cluster_0	ENSMUSG00000035798	Zdhhc17	0.685958938	0.984362775	1078	775	0.127	0.234	0.521004135	1.02E-13	3.09E-09	up	Zdhhc17
Control-vs-T2DM	FB_Cluster_0	ENSMUSG00000020894	Vamp2	0.450517483	0.604987052	1078	775	0.09	0.164	0.425239423	1.12E-13	3.42E-09	up	Vamp2
Control-vs-T2DM	FB_Cluster_0	ENSMUSG00000073563	Csnk1g3	1.131522676	1.453861361	1078	775	0.202	0.316	0.361595938	1.61E-13	4.91E-09	up	Csnk1g3
Control-vs-T2DM	FB_Cluster_0	ENSMUSG00000039967	Zfp292	1.086977506	1.604321988	1078	775	0.204	0.338	0.561598839	2.85E-13	8.70E-09	up	Zfp292
Control-vs-T2DM	FB_Cluster_0	ENSMUSG00000024240	Epc1	1.191354097	1.547749744	1078	775	0.212	0.333	0.37754206	3.07E-13	9.35E-09	up	Epc1
Control-vs-T2DM	FB_Cluster_0	ENSMUSG00000031508	Ankrd10	0.570026489	0.821344323	1078	775	0.11	0.203	0.52688076	7.70E-13	2.35E-08	up	Ankrd10
Control-vs-T2DM	FB_Cluster_0	ENSMUSG00000021987	Mtmr6	0.415504722	0.588039642	1078	775	0.077	0.151	0.500946689	1.65E-12	5.03E-08	up	Mtmr6
Control-vs-T2DM	FB_Cluster_0	ENSMUSG00000027304	Rtf1	0.847964703	1.106142712	1078	775	0.156	0.254	0.383421707	1.90E-12	5.78E-08	up	Rtf1
Control-vs-T2DM	FB_Cluster_0	ENSMUSG00000025078	Nhlrc2	0.621553593	1.011554731	1078	775	0.115	0.223	0.702534205	2.36E-12	7.19E-08	up	Nhlrc2
Control-vs-T2DM	FB_Cluster_0	ENSMUSG00000046949	Nqo2	0.240553041	0.380010901	1078	775	0.045	0.106	0.659465745	3.14E-12	9.57E-08	up	Nqo2
Control-vs-T2DM	FB_Cluster_0	ENSMUSG00000058440	Nrf1	0.665896954	0.871110357	1078	775	0.131	0.218	0.387505526	4.33E-12	1.32E-07	up	Nrf1
Control-vs-T2DM	FB_Cluster_0	ENSMUSG00000074582	Arfgef2	0.440230621	0.610064329	1078	775	0.086	0.155	0.470610666	6.70E-12	2.04E-07	up	Arfgef2
Control-vs-T2DM	FB_Cluster_0	ENSMUSG00000028420	Tmem38b	0.284097871	0.429996267	1078	775	0.054	0.116	0.597763863	6.73E-12	2.05E-07	up	Tmem38b
Control-vs-T2DM	FB_Cluster_0	ENSMUSG00000038497	Tmco3	0.312117657	0.444236187	1078	775	0.058	0.117	0.509099511	7.37E-12	2.25E-07	up	Tmco3
Control-vs-T2DM	FB_Cluster_0	ENSMUSG00000021938	Pspc1	0.663126117	0.911749806	1078	775	0.131	0.221	0.459295393	8.04E-12	2.45E-07	up	Pspc1
Control-vs-T2DM	FB_Cluster_0	ENSMUSG00000046785	Epm2aip1	0.382179998	0.520813645	1078	775	0.075	0.143	0.446414512	8.27E-12	2.52E-07	up	Epm2aip1
Control-vs-T2DM	FB_Cluster_0	ENSMUSG00000033632	AW554918	1.168115975	1.614067794	1078	775	0.206	0.329	0.466483537	9.31E-12	2.84E-07	up	AW554918
Control-vs-T2DM	FB_Cluster_0	ENSMUSG00000040022	Rab11fip2	0.950859212	1.228832726	1078	775	0.176	0.276	0.369950574	1.19E-11	3.62E-07	up	Rab11fip2
Control-vs-T2DM	FB_Cluster_0	ENSMUSG00000040651	Tasor	1.673822241	2.178285118	1078	775	0.29	0.426	0.38002652	1.22E-11	3.72E-07	up	Tasor
Control-vs-T2DM	FB_Cluster_0	ENSMUSG00000023927	Satb1	0.25374663	0.490228776	1078	775	0.051	0.125	0.949792324	1.27E-11	3.88E-07	up	Satb1
Control-vs-T2DM	FB_Cluster_0	ENSMUSG00000030161	Gabarapl1	0.405451136	0.536633335	1078	775	0.08	0.145	0.404321655	1.52E-11	4.62E-07	up	Gabarapl1
Control-vs-T2DM	FB_Cluster_0	ENSMUSG00000022801	Lrch3	1.75063777	2.415897573	1078	775	0.301	0.446	0.464655996	3.00E-11	9.13E-07	up	Lrch3
Control-vs-T2DM	FB_Cluster_0	ENSMUSG00000029125	Stx18	0.432035543	0.560414665	1078	775	0.081	0.145	0.375268223	3.04E-11	9.28E-07	up	Stx18
Control-vs-T2DM	FB_Cluster_0	ENSMUSG00000027180	Fbxo3	0.470115762	0.670954971	1078	775	0.094	0.169	0.513108052	4.10E-11	1.25E-06	up	Fbxo3
Control-vs-T2DM	FB_Cluster_0	ENSMUSG00000097039	Pvt1	0.913574644	1.265642079	1078	775	0.161	0.268	0.470231031	4.20E-11	1.28E-06	up	Pvt1
Control-vs-T2DM	FB_Cluster_0	ENSMUSG00000004071	Cdip1	0.480658727	0.637068316	1078	775	0.093	0.16	0.406361482	6.87E-11	2.09E-06	up	Cdip1
Control-vs-T2DM	FB_Cluster_0	ENSMUSG00000034893	Cog3	0.393622794	0.594319691	1078	775	0.08	0.155	0.594301671	7.14E-11	2.18E-06	up	Cog3
Control-vs-T2DM	FB_Cluster_0	ENSMUSG00000022019	Tdrd3	0.907420548	1.17121782	1078	775	0.164	0.258	0.368130369	1.05E-10	3.21E-06	up	Tdrd3
Control-vs-T2DM	FB_Cluster_0	ENSMUSG00000020935	Dcakd	0.370186486	0.563892284	1078	775	0.076	0.148	0.60703353	1.16E-10	3.54E-06	up	Dcakd
Control-vs-T2DM	FB_Cluster_0	ENSMUSG00000041415	Dicer1	0.709341672	0.993561714	1078	775	0.14	0.234	0.486070703	1.36E-10	4.15E-06	up	Dicer1
Control-vs-T2DM	FB_Cluster_0	ENSMUSG00000113005	Gm34408	0.61383795	1.073002532	1078	775	0.109	0.214	0.805623173	2.09E-10	6.37E-06	up	Gm34408
Control-vs-T2DM	FB_Cluster_0	ENSMUSG00000028211	Trp53inp1	0.159266163	0.463614547	1078	775	0.033	0.108	1.540891637	2.19E-10	6.66E-06	up	Trp53inp1
Control-vs-T2DM	FB_Cluster_0	ENSMUSG00000029279	Brdt	0.239791348	0.43029252	1078	775	0.046	0.111	0.84327188	2.22E-10	6.75E-06	up	Brdt
Control-vs-T2DM	FB_Cluster_0	ENSMUSG00000049807	Arhgap23	0.371309659	0.511183111	1078	775	0.072	0.134	0.461111036	2.25E-10	6.87E-06	up	Arhgap23
Control-vs-T2DM	FB_Cluster_0	ENSMUSG00000025147	Mob2	0.259763664	0.470263792	1078	775	0.054	0.124	0.856022087	2.62E-10	7.97E-06	up	Mob2
Control-vs-T2DM	FB_Cluster_0	ENSMUSG00000024725	Ostf1	0.465641171	0.600888861	1078	775	0.095	0.159	0.367809831	3.18E-10	9.68E-06	up	Ostf1
Control-vs-T2DM	FB_Cluster_0	ENSMUSG00000022514	Il1rap	0.800215823	1.073334502	1078	775	0.144	0.232	0.423592827	3.75E-10	1.14E-05	up	Il1rap
Control-vs-T2DM	FB_Cluster_0	ENSMUSG00000036202	Rif1	0.869340441	1.185814268	1078	775	0.161	0.257	0.447840611	3.86E-10	1.18E-05	up	Rif1
Control-vs-T2DM	FB_Cluster_0	ENSMUSG00000022390	Zc3h7b	0.332203313	0.433678551	1078	775	0.063	0.115	0.384458042	4.50E-10	1.37E-05	up	Zc3h7b
Control-vs-T2DM	FB_Cluster_0	ENSMUSG00000033855	Ston1	0.827099885	1.093897871	1078	775	0.156	0.248	0.40330204	4.68E-10	1.43E-05	up	Ston1
Control-vs-T2DM	FB_Cluster_0	ENSMUSG00000029428	Stx2	0.56815735	0.793472583	1078	775	0.106	0.186	0.481817744	4.75E-10	1.45E-05	up	Stx2
Control-vs-T2DM	FB_Cluster_0	ENSMUSG00000027678	Ncoa3	0.738896026	1.000195655	1078	775	0.143	0.232	0.436787966	4.88E-10	1.49E-05	up	Ncoa3
Control-vs-T2DM	FB_Cluster_0	ENSMUSG00000039191	Rbpj	0.882019083	1.17285686	1078	775	0.173	0.27	0.41110462	5.03E-10	1.53E-05	up	Rbpj
Control-vs-T2DM	FB_Cluster_0	ENSMUSG00000085702	Mecomos	0.260498341	0.465245559	1078	775	0.046	0.111	0.836474538	8.03E-10	2.45E-05	up	Mecomos
Control-vs-T2DM	FB_Cluster_0	ENSMUSG00000036104	Rab3gap1	0.713985449	0.919153465	1078	775	0.143	0.223	0.36436599	9.09E-10	2.77E-05	up	Rab3gap1
Control-vs-T2DM	FB_Cluster_0	ENSMUSG00000070056	Mfhas1	0.317587275	0.491144986	1078	775	0.058	0.12	0.62883538	9.23E-10	2.81E-05	up	Mfhas1
Control-vs-T2DM	FB_Cluster_0	ENSMUSG00000020263	Appl2	0.39164144	0.511465898	1078	775	0.08	0.137	0.385018346	1.01E-09	3.08E-05	up	Appl2
Control-vs-T2DM	FB_Cluster_0	ENSMUSG00000030849	Fgfr2	2.63875928	3.486207922	1078	775	0.412	0.556	0.401785579	1.04E-09	3.17E-05	up	Fgfr2
Control-vs-T2DM	FB_Cluster_0	ENSMUSG00000021809	Nudt13	0.281831023	0.391860141	1078	775	0.054	0.102	0.475364716	1.20E-09	3.66E-05	up	Nudt13
Control-vs-T2DM	FB_Cluster_0	ENSMUSG00000045210	Vcpip1	0.458064175	0.597846159	1078	775	0.093	0.154	0.38415093	2.32E-09	7.07E-05	up	Vcpip1
Control-vs-T2DM	FB_Cluster_0	ENSMUSG00000017978	Cadps2	0.365859734	0.697840871	1078	775	0.066	0.148	0.931419897	2.72E-09	8.28E-05	up	Cadps2
Control-vs-T2DM	FB_Cluster_0	ENSMUSG00000053289	Ddx10	0.450443767	0.645647564	1078	775	0.081	0.152	0.519303036	2.87E-09	8.75E-05	up	Ddx10
Control-vs-T2DM	FB_Cluster_0	ENSMUSG00000021668	Polk	0.239028162	0.40235101	1078	775	0.045	0.103	0.751029133	2.89E-09	8.81E-05	up	Polk
Control-vs-T2DM	FB_Cluster_0	ENSMUSG00000022194	Pabpn1	0.552576058	0.735448663	1078	775	0.11	0.179	0.412386675	3.04E-09	9.25E-05	up	Pabpn1
Control-vs-T2DM	FB_Cluster_0	ENSMUSG00000032413	Rasa2	0.512828123	0.721259163	1078	775	0.096	0.166	0.491961079	3.40E-09	0.000103562	up	Rasa2
Control-vs-T2DM	FB_Cluster_0	ENSMUSG00000056938	Acbd4	0.29576828	0.489976432	1078	775	0.059	0.125	0.728051736	3.60E-09	0.000109603	up	Acbd4
Control-vs-T2DM	FB_Cluster_0	ENSMUSG00000031153	Gripap1	0.349958915	0.540251117	1078	775	0.07	0.134	0.626299416	4.25E-09	0.000129396	up	Gripap1
Control-vs-T2DM	FB_Cluster_0	ENSMUSG00000051041	Olfml1	0.789316698	1.100617097	1078	775	0.154	0.246	0.479584779	4.25E-09	0.000129644	up	Olfml1
Control-vs-T2DM	FB_Cluster_0	ENSMUSG00000041926	Rnpep	0.329559377	0.429883125	1078	775	0.063	0.112	0.383303924	4.29E-09	0.000130699	up	Rnpep
Control-vs-T2DM	FB_Cluster_0	ENSMUSG00000031129	Slc9a9	0.500424866	0.649248215	1078	775	0.09	0.155	0.375550593	4.32E-09	0.000131621	up	Slc9a9
Control-vs-T2DM	FB_Cluster_0	ENSMUSG00000027881	Prpf38b	0.709701702	0.929408581	1078	775	0.141	0.219	0.389052152	4.87E-09	0.000148389	up	Prpf38b
Control-vs-T2DM	FB_Cluster_0	ENSMUSG00000032419	Tbx18	0.255972335	0.450685044	1078	775	0.047	0.11	0.815888252	5.26E-09	0.000160235	up	Tbx18
Control-vs-T2DM	FB_Cluster_0	ENSMUSG00000079036	Alkbh1	0.367788685	0.553436657	1078	775	0.067	0.134	0.589409554	5.56E-09	0.000169534	up	Alkbh1
Control-vs-T2DM	FB_Cluster_0	ENSMUSG00000029669	Tspan12	0.25657307	0.408821883	1078	775	0.047	0.103	0.671893334	8.35E-09	0.000254386	up	Tspan12
Control-vs-T2DM	FB_Cluster_0	ENSMUSG00000032625	Thsd7a	11.8134771	15.22813908	1078	775	0.776	0.872	0.366303253	8.99E-09	0.000274154	up	Thsd7a
Control-vs-T2DM	FB_Cluster_0	ENSMUSG00000030557	Mef2a	1.583592079	2.12509174	1078	775	0.282	0.403	0.424301155	9.45E-09	0.000288043	up	Mef2a
Control-vs-T2DM	FB_Cluster_0	ENSMUSG00000026289	Atg16l1	0.423147094	0.577658332	1078	775	0.083	0.142	0.448965997	9.75E-09	0.000297305	up	Atg16l1
Control-vs-T2DM	FB_Cluster_0	ENSMUSG00000061950	Ppp4r1	0.455901598	0.654795896	1078	775	0.09	0.159	0.52222671	1.18E-08	0.000360291	up	Ppp4r1
Control-vs-T2DM	FB_Cluster_0	ENSMUSG00000020937	Plcd3	0.30911173	0.444313772	1078	775	0.059	0.115	0.523308474	1.20E-08	0.000364859	up	Plcd3
Control-vs-T2DM	FB_Cluster_0	ENSMUSG00000031536	Polb	0.492498074	0.638594168	1078	775	0.095	0.155	0.374714291	1.28E-08	0.000389712	up	Polb
Control-vs-T2DM	FB_Cluster_0	ENSMUSG00000000378	Ccm2	0.526000302	0.758567652	1078	775	0.107	0.182	0.528130148	1.32E-08	0.000401054	up	Ccm2
Control-vs-T2DM	FB_Cluster_0	ENSMUSG00000033763	Mtss2	0.20238595	0.434983469	1078	775	0.038	0.101	1.103470394	1.37E-08	0.00041608	up	Mtss2
Control-vs-T2DM	FB_Cluster_0	ENSMUSG00000035357	Pdzrn3	0.967081777	1.525345689	1078	775	0.169	0.279	0.657371849	1.38E-08	0.000419317	up	Pdzrn3
Control-vs-T2DM	FB_Cluster_0	ENSMUSG00000003778	Brd8	0.702988047	1.109765375	1078	775	0.133	0.228	0.658607418	1.38E-08	0.00042022	up	Brd8
Control-vs-T2DM	FB_Cluster_0	ENSMUSG00000036099	Vezt	0.316790577	0.584496046	1078	775	0.068	0.145	0.883455308	1.53E-08	0.00046642	up	Vezt
Control-vs-T2DM	FB_Cluster_0	ENSMUSG00000032872	Cyb5r4	0.344033587	0.459306488	1078	775	0.066	0.116	0.416802526	1.60E-08	0.000487609	up	Cyb5r4
Control-vs-T2DM	FB_Cluster_0	ENSMUSG00000038828	Tmem214	0.407220882	0.531873002	1078	775	0.08	0.133	0.385187253	1.69E-08	0.000515445	up	Tmem214
Control-vs-T2DM	FB_Cluster_0	ENSMUSG00000028986	Klhl7	0.418784449	0.592776933	1078	775	0.074	0.135	0.501180341	1.86E-08	0.00056623	up	Klhl7
Control-vs-T2DM	FB_Cluster_0	ENSMUSG00000078919	Dpm1	0.326306975	0.571201242	1078	775	0.067	0.138	0.807579779	2.17E-08	0.000662308	up	Dpm1
Control-vs-T2DM	FB_Cluster_0	ENSMUSG00000038780	Smurf1	0.339353717	0.49474677	1078	775	0.071	0.13	0.543766979	2.40E-08	0.000732544	up	Smurf1
Control-vs-T2DM	FB_Cluster_0	ENSMUSG00000052539	Magi3	1.766838234	2.387090692	1078	775	0.277	0.397	0.434062207	2.52E-08	0.00076927	up	Magi3
Control-vs-T2DM	FB_Cluster_0	ENSMUSG00000029772	Ahcyl2	0.380874644	0.522203932	1078	775	0.065	0.12	0.455194583	2.99E-08	0.000911617	up	Ahcyl2
Control-vs-T2DM	FB_Cluster_0	ENSMUSG00000017692	Rhbdl3	0.279191994	0.405343351	1078	775	0.054	0.105	0.537726139	3.55E-08	0.001081578	up	Rhbdl3
Control-vs-T2DM	FB_Cluster_0	ENSMUSG00000102758	Naaladl2	5.604032371	7.595123109	1078	775	0.539	0.672	0.438601311	3.75E-08	0.001143167	up	Naaladl2
Control-vs-T2DM	FB_Cluster_0	ENSMUSG00000005501	Usp40	0.638221618	0.907107049	1078	775	0.125	0.206	0.507148341	3.89E-08	0.001185752	up	Usp40
Control-vs-T2DM	FB_Cluster_0	ENSMUSG00000004319	Clcn3	0.707458324	1.03846042	1078	775	0.135	0.223	0.55366417	4.62E-08	0.001409111	up	Clcn3
Control-vs-T2DM	FB_Cluster_0	ENSMUSG00000031380	Vegfd	0.466344574	0.659416018	1078	775	0.065	0.129	0.499702038	6.12E-08	0.001866555	up	Vegfd
Control-vs-T2DM	FB_Cluster_0	ENSMUSG00000005102	Eif2ak4	0.272442641	0.511218725	1078	775	0.054	0.119	0.907740896	6.18E-08	0.001884427	up	Eif2ak4
Control-vs-T2DM	FB_Cluster_0	ENSMUSG00000116858	Gm49797	0.451458018	0.686225747	1078	775	0.087	0.159	0.603982115	6.26E-08	0.001907151	up	Gm49797
Control-vs-T2DM	FB_Cluster_0	ENSMUSG00000042348	Arl15	4.203901409	5.554079215	1078	775	0.527	0.659	0.401810576	7.53E-08	0.002296464	up	Arl15
Control-vs-T2DM	FB_Cluster_0	ENSMUSG00000057193	Slc44a2	0.394880609	0.524006777	1078	775	0.078	0.133	0.408078936	7.58E-08	0.002311147	up	Slc44a2
Control-vs-T2DM	FB_Cluster_0	ENSMUSG00000079659	Tmem243	0.94381415	1.272678171	1078	775	0.17	0.258	0.431253442	8.78E-08	0.002674539	up	Tmem243
Control-vs-T2DM	FB_Cluster_0	ENSMUSG00000026803	Ttf1	0.359830646	0.483488283	1078	775	0.07	0.121	0.426060346	9.58E-08	0.002920644	up	Ttf1
Control-vs-T2DM	FB_Cluster_0	ENSMUSG00000117328	4930474M22Rik	0.215566521	0.406605746	1078	775	0.045	0.103	0.915183135	9.61E-08	0.002929795	up	4930474M22Rik
Control-vs-T2DM	FB_Cluster_0	ENSMUSG00000025925	Terf1	0.575340805	0.756982971	1078	775	0.108	0.172	0.395783892	9.91E-08	0.003019889	up	Terf1
Control-vs-T2DM	FB_Cluster_0	ENSMUSG00000030421	Uri1	0.476998066	0.680009136	1078	775	0.099	0.166	0.511480435	1.03E-07	0.003146351	up	Uri1
Control-vs-T2DM	FB_Cluster_0	ENSMUSG00000030314	Atg7	0.321230547	0.416675618	1078	775	0.063	0.111	0.375212743	1.04E-07	0.003177784	up	Atg7
Control-vs-T2DM	FB_Cluster_0	ENSMUSG00000037940	Inpp4b	0.436598511	0.622755852	1078	775	0.069	0.129	0.512260705	1.11E-07	0.003371148	up	Inpp4b
Control-vs-T2DM	FB_Cluster_0	ENSMUSG00000030068	Gm20696	0.465748854	0.614009512	1078	775	0.089	0.145	0.398634005	1.33E-07	0.004045006	up	Gm20696
Control-vs-T2DM	FB_Cluster_0	ENSMUSG00000038383	Pigu	0.335744889	0.494430004	1078	775	0.066	0.121	0.558262983	1.37E-07	0.004168152	up	Pigu
Control-vs-T2DM	FB_Cluster_0	ENSMUSG00000028233	Tgs1	0.333325762	0.485094326	1078	775	0.066	0.124	0.541197099	1.55E-07	0.004737088	up	Tgs1
Control-vs-T2DM	FB_Cluster_0	ENSMUSG00000006678	Pola1	0.508166582	0.717108907	1078	775	0.096	0.161	0.496808026	1.61E-07	0.004915656	up	Pola1
Control-vs-T2DM	FB_Cluster_0	ENSMUSG00000006010	Odr4	0.445271591	0.597366214	1078	775	0.094	0.152	0.423847597	1.63E-07	0.004970387	up	Odr4
Control-vs-T2DM	FB_Cluster_0	ENSMUSG00000020319	Wdpcp	0.990081735	1.323752147	1078	775	0.167	0.254	0.418976763	1.68E-07	0.005110801	up	Wdpcp
Control-vs-T2DM	FB_Cluster_0	ENSMUSG00000014426	Map3k4	0.386594491	0.522473661	1078	775	0.076	0.129	0.4344402	1.90E-07	0.005804206	up	Map3k4
Control-vs-T2DM	FB_Cluster_0	ENSMUSG00000019039	Dalrd3	0.30460663	0.419692951	1078	775	0.058	0.102	0.462257051	1.97E-07	0.005997909	up	Dalrd3
Control-vs-T2DM	FB_Cluster_0	ENSMUSG00000029009	Mthfr	0.270104519	0.428774349	1078	775	0.052	0.103	0.666503228	2.06E-07	0.006286939	up	Mthfr
Control-vs-T2DM	FB_Cluster_0	ENSMUSG00000059669	Taf1b	0.312968663	0.577240088	1078	775	0.061	0.129	0.882942296	2.13E-07	0.006480172	up	Taf1b
Control-vs-T2DM	FB_Cluster_0	ENSMUSG00000029173	Sepsecs	0.217126726	0.398509289	1078	775	0.047	0.105	0.875773718	2.31E-07	0.007046025	up	Sepsecs
Control-vs-T2DM	FB_Cluster_0	ENSMUSG00000045594	Glb1	0.404314631	0.58148842	1078	775	0.08	0.141	0.52416335	2.33E-07	0.007109386	up	Glb1
Control-vs-T2DM	FB_Cluster_0	ENSMUSG00000043987	Cep164	0.36276294	0.482512322	1078	775	0.071	0.124	0.41144003	2.52E-07	0.007671828	up	Cep164
Control-vs-T2DM	FB_Cluster_0	ENSMUSG00000041765	Ubac2	0.54781851	0.796757371	1078	775	0.109	0.182	0.540360177	3.19E-07	0.009732872	up	Ubac2
Control-vs-T2DM	FB_Cluster_0	ENSMUSG00000068923	Syt11	0.375513259	0.501207197	1078	775	0.074	0.125	0.416446958	3.49E-07	0.010623217	up	Syt11
Control-vs-T2DM	FB_Cluster_0	ENSMUSG00000026575	Nme7	0.303842393	0.422198923	1078	775	0.057	0.103	0.474466654	4.04E-07	0.012320858	up	Nme7
Control-vs-T2DM	FB_Cluster_0	ENSMUSG00000054737	Zfp182	0.826837934	1.160229072	1078	775	0.151	0.239	0.488683059	4.21E-07	0.01283537	up	Zfp182
Control-vs-T2DM	FB_Cluster_0	ENSMUSG00000019989	Enpp3	0.309442311	0.455486021	1078	775	0.06	0.112	0.557586856	4.40E-07	0.013424645	up	Enpp3
Control-vs-T2DM	FB_Cluster_0	ENSMUSG00000027605	Acss2	0.347295067	0.460282478	1078	775	0.069	0.117	0.406255658	4.55E-07	0.013857948	up	Acss2
Control-vs-T2DM	FB_Cluster_0	ENSMUSG00000034341	Wbp2	0.31597446	0.425687264	1078	775	0.064	0.112	0.429868333	4.91E-07	0.014966155	up	Wbp2
Control-vs-T2DM	FB_Cluster_0	ENSMUSG00000079038	D130040H23Rik	0.288119036	0.40282488	1078	775	0.059	0.105	0.48334527	5.38E-07	0.016382568	up	D130040H23Rik
Control-vs-T2DM	FB_Cluster_0	ENSMUSG00000040365	Trim41	0.270692727	0.411326551	1078	775	0.058	0.11	0.603445905	6.04E-07	0.018404446	up	Trim41
Control-vs-T2DM	FB_Cluster_0	ENSMUSG00000030894	Tpp1	0.369622662	0.490972538	1078	775	0.076	0.125	0.409492671	6.81E-07	0.020765278	up	Tpp1
Control-vs-T2DM	FB_Cluster_0	ENSMUSG00000022701	Ccdc191	0.446731244	0.671971562	1078	775	0.083	0.145	0.588884791	6.97E-07	0.021246928	up	Ccdc191
Control-vs-T2DM	FB_Cluster_0	ENSMUSG00000036339	Tmem260	0.515725914	0.721432349	1078	775	0.104	0.169	0.484179825	7.64E-07	0.023271269	up	Tmem260
Control-vs-T2DM	FB_Cluster_0	ENSMUSG00000090084	Srpx	0.590342533	0.759298999	1078	775	0.106	0.165	0.363061446	7.77E-07	0.023680646	up	Srpx
Control-vs-T2DM	FB_Cluster_0	ENSMUSG00000067942	Zfp160	0.388288298	0.540944517	1078	775	0.08	0.134	0.47824757	7.95E-07	0.02421653	up	Zfp160
Control-vs-T2DM	FB_Cluster_0	ENSMUSG00000020091	Eif4ebp2	0.470259923	0.638815474	1078	775	0.096	0.154	0.441859941	7.98E-07	0.024329507	up	Eif4ebp2
Control-vs-T2DM	FB_Cluster_0	ENSMUSG00000023088	Abcc1	0.538587462	0.742124217	1078	775	0.109	0.175	0.462406585	8.74E-07	0.026641595	up	Abcc1
Control-vs-T2DM	FB_Cluster_0	ENSMUSG00000063656	Gm10135	0.470664264	0.61914668	1078	775	0.085	0.139	0.39550942	8.89E-07	0.027096804	up	Gm10135
Control-vs-T2DM	FB_Cluster_0	ENSMUSG00000037949	Ano10	0.372871025	0.515909178	1078	775	0.071	0.125	0.468333172	9.03E-07	0.027511298	up	Ano10
Control-vs-T2DM	FB_Cluster_0	ENSMUSG00000020166	Cnot2	0.867449115	1.145228193	1078	775	0.171	0.25	0.400743719	9.36E-07	0.028531611	up	Cnot2
Control-vs-T2DM	FB_Cluster_0	ENSMUSG00000037902	Sirpa	0.443025038	0.569889916	1078	775	0.088	0.141	0.36322255	9.52E-07	0.029001916	up	Sirpa
Control-vs-T2DM	FB_Cluster_0	ENSMUSG00000033111	3830406C13Rik	0.314164808	0.430225256	1078	775	0.062	0.108	0.453446792	9.73E-07	0.029641034	up	3830406C13Rik
Control-vs-T2DM	FB_Cluster_0	ENSMUSG00000037355	Uvssa	0.30166225	0.394805339	1078	775	0.061	0.102	0.388094535	1.10E-06	0.033581153	up	Uvssa
Control-vs-T2DM	FB_Cluster_0	ENSMUSG00000026339	Ccdc93	0.257036668	0.392033124	1078	775	0.053	0.102	0.608808158	1.29E-06	0.039452426	up	Ccdc93
Control-vs-T2DM	FB_Cluster_0	ENSMUSG00000026918	Brd3	0.493481537	0.638961249	1078	775	0.101	0.156	0.372665778	1.42E-06	0.043204911	up	Brd3
Control-vs-T2DM	FB_Cluster_0	ENSMUSG00000034601	2700049A03Rik	0.316757456	0.445489721	1078	775	0.059	0.105	0.49188199	1.58E-06	0.048212852	up	2700049A03Rik
Control-vs-T2DM	FB_Cluster_0	ENSMUSG00000021820	Camk2g	0.308118042	0.41659551	1078	775	0.06	0.106	0.43504224	1.61E-06	0.049184453	up	Camk2g
Control-vs-T2DM	FB_Cluster_0	ENSMUSG00000033768	Nrxn2	0.490089162	0.676179982	1078	775	0.092	0.154	0.464282064	1.63E-06	0.049591571	up	Nrxn2
Control-vs-T2DM	FB_Cluster_0	ENSMUSG00000097431	Gm26782	0.378659772	0.500421895	1078	775	0.074	0.121	0.402150071	1.63E-06	0.049608097	up	Gm26782
Control-vs-T2DM	FB_Cluster_0	ENSMUSG00000047248	C2cd3	0.288581946	0.447178903	1078	775	0.057	0.108	0.631693826	1.79E-06	0.05449502	up	C2cd3
Control-vs-T2DM	FB_Cluster_0	ENSMUSG00000036977	Anapc10	0.379623308	0.502310443	1078	775	0.075	0.123	0.403917898	1.89E-06	0.057706355	up	Anapc10
Control-vs-T2DM	FB_Cluster_0	ENSMUSG00000033054	Npat	0.242942657	0.427544353	1078	775	0.051	0.106	0.815201944	1.94E-06	0.059231862	up	Npat
Control-vs-T2DM	FB_Cluster_0	ENSMUSG00000027244	Atg13	0.317574582	0.425953281	1078	775	0.066	0.112	0.4234842	2.06E-06	0.062828709	up	Atg13
Control-vs-T2DM	FB_Cluster_0	ENSMUSG00000028863	Meaf6	0.284296312	0.410737564	1078	775	0.056	0.102	0.53066534	2.35E-06	0.071735066	up	Meaf6
Control-vs-T2DM	FB_Cluster_0	ENSMUSG00000079057	Cyp4v3	0.313394525	0.496731684	1078	775	0.066	0.124	0.66431693	2.46E-06	0.074917981	up	Cyp4v3
Control-vs-T2DM	FB_Cluster_0	ENSMUSG00000035629	Rubcn	0.349476615	0.500567973	1078	775	0.071	0.123	0.518245493	2.88E-06	0.087888531	up	Rubcn
Control-vs-T2DM	FB_Cluster_0	ENSMUSG00000021666	Gfm2	0.313201261	0.51981479	1078	775	0.066	0.124	0.730724618	3.22E-06	0.098122457	up	Gfm2
Control-vs-T2DM	FB_Cluster_0	ENSMUSG00000024740	Ddb1	0.452376426	0.611534283	1078	775	0.093	0.147	0.434826644	3.97E-06	0.120880806	up	Ddb1
Control-vs-T2DM	FB_Cluster_0	ENSMUSG00000085457	1110046J04Rik	0.278659979	0.454419069	1078	775	0.052	0.102	0.705317373	4.13E-06	0.126016745	up	1110046J04Rik
Control-vs-T2DM	FB_Cluster_0	ENSMUSG00000021936	Mapk8	0.446354039	0.688367255	1078	775	0.093	0.161	0.624876378	4.48E-06	0.136547267	up	Mapk8
Control-vs-T2DM	FB_Cluster_0	ENSMUSG00000035293	G2e3	0.321711594	0.430661312	1078	775	0.065	0.108	0.420672381	4.68E-06	0.142743267	up	G2e3
Control-vs-T2DM	FB_Cluster_0	ENSMUSG00000022639	Dubr	0.273224087	0.412105032	1078	775	0.057	0.105	0.592749513	6.26E-06	0.190902442	up	Dubr
Control-vs-T2DM	FB_Cluster_0	ENSMUSG00000032386	Trip4	0.459500936	0.781901484	1078	775	0.095	0.166	0.76678961	7.13E-06	0.21739252	up	Trip4
Control-vs-T2DM	FB_Cluster_0	ENSMUSG00000107422	Gm44129	0.607552031	0.81683194	1078	775	0.106	0.164	0.426970483	7.80E-06	0.237617635	up	Gm44129
Control-vs-T2DM	FB_Cluster_0	ENSMUSG00000024878	Cbwd1	0.311718513	0.44120173	1078	775	0.06	0.107	0.501058818	7.87E-06	0.239881252	up	Cbwd1
Control-vs-T2DM	FB_Cluster_0	ENSMUSG00000022025	Cnmd	0.846551949	1.585210381	1078	775	0.079	0.15	0.904924409	9.34E-06	0.284724814	up	Cnmd
Control-vs-T2DM	FB_Cluster_0	ENSMUSG00000049184	Purg	0.502613046	0.669005759	1078	775	0.099	0.154	0.412499134	9.71E-06	0.295956701	up	Purg
Control-vs-T2DM	FB_Cluster_0	ENSMUSG00000038299	Wdr36	0.297939751	0.444683607	1078	775	0.062	0.111	0.577598856	1.11E-05	0.338565158	up	Wdr36
Control-vs-T2DM	FB_Cluster_0	ENSMUSG00000085526	Gm16083	0.749296594	1.163139067	1078	775	0.133	0.213	0.634346302	1.12E-05	0.341318432	up	Gm16083
Control-vs-T2DM	FB_Cluster_0	ENSMUSG00000086708	Gm15577	0.238865363	0.474140248	1078	775	0.046	0.101	0.988816588	1.23E-05	0.375481914	up	Gm15577
Control-vs-T2DM	FB_Cluster_0	ENSMUSG00000032507	Fbxl2	0.354208364	0.547286584	1078	775	0.065	0.117	0.627554551	1.25E-05	0.379922465	up	Fbxl2
Control-vs-T2DM	FB_Cluster_0	ENSMUSG00000061533	Cep128	0.41406101	0.624306878	1078	775	0.083	0.142	0.592294687	1.25E-05	0.382272599	up	Cep128
Control-vs-T2DM	FB_Cluster_0	ENSMUSG00000025584	Pde8a	0.380337166	0.505253064	1078	775	0.077	0.124	0.409633482	1.35E-05	0.410934047	up	Pde8a
Control-vs-T2DM	FB_Cluster_0	ENSMUSG00000055653	Gpc3	0.502056681	0.69861533	1078	775	0.078	0.129	0.476567215	1.58E-05	0.482865348	up	Gpc3
Control-vs-T2DM	FB_Cluster_0	ENSMUSG00000022837	Iqcb1	0.401004293	0.541318514	1078	775	0.074	0.123	0.432766813	1.60E-05	0.487444858	up	Iqcb1
Control-vs-T2DM	FB_Cluster_0	ENSMUSG00000044072	Eml6	0.575197201	0.794172983	1078	775	0.102	0.161	0.465327479	1.64E-05	0.499152615	up	Eml6
Control-vs-T2DM	FB_Cluster_0	ENSMUSG00000039844	Rapgef1	0.477490747	0.659701839	1078	775	0.096	0.152	0.466257912	1.82E-05	0.553524634	up	Rapgef1
Control-vs-T2DM	FB_Cluster_0	ENSMUSG00000022507	1810013L24Rik	0.383653082	0.501920581	1078	775	0.083	0.128	0.387568173	1.98E-05	0.603626165	up	1810013L24Rik
Control-vs-T2DM	FB_Cluster_0	ENSMUSG00000035382	Pcsk7	0.493667297	0.644424206	1078	775	0.1	0.148	0.384403255	2.57E-05	0.784669397	up	Pcsk7
Control-vs-T2DM	FB_Cluster_0	ENSMUSG00000086429	Gt(ROSA)26Sor	0.324558029	0.448056537	1078	775	0.073	0.121	0.465081853	2.64E-05	0.805179696	up	Gt(ROSA)26Sor
Control-vs-T2DM	FB_Cluster_0	ENSMUSG00000020375	Rufy1	0.385591155	0.512500048	1078	775	0.076	0.12	0.410387552	2.84E-05	0.865101253	up	Rufy1
Control-vs-T2DM	FB_Cluster_0	ENSMUSG00000060206	Zfp462	0.332924093	0.473912777	1078	775	0.065	0.111	0.509299395	3.70E-05	1	up	Zfp462
Control-vs-T2DM	FB_Cluster_0	ENSMUSG00000018433	Nol11	0.288803497	0.439901156	1078	775	0.059	0.106	0.606919646	3.81E-05	1	up	Nol11
Control-vs-T2DM	FB_Cluster_0	ENSMUSG00000045193	Cirbp	0.334552221	0.501467259	1078	775	0.067	0.116	0.583780587	4.30E-05	1	up	Cirbp
Control-vs-T2DM	FB_Cluster_0	ENSMUSG00000038302	Afg1l	0.450039499	0.644957315	1078	775	0.088	0.139	0.519055188	4.47E-05	1	up	Afg1l
Control-vs-T2DM	FB_Cluster_0	ENSMUSG00000090117	Gm16541	0.349100663	0.534377133	1078	775	0.065	0.117	0.614071927	4.71E-05	1	up	Gm16541
Control-vs-T2DM	FB_Cluster_0	ENSMUSG00000078566	Bnip3	0.316153641	0.429670443	1078	775	0.062	0.103	0.442484177	4.71E-05	1	up	Bnip3
Control-vs-T2DM	FB_Cluster_0	ENSMUSG00000106395	Gm42439	0.440007314	0.571131923	1078	775	0.081	0.124	0.376221257	5.49E-05	1	up	Gm42439
Control-vs-T2DM	FB_Cluster_0	ENSMUSG00000043635	Adamts3	0.419109377	0.572836776	1078	775	0.068	0.115	0.450704958	5.61E-05	1	up	Adamts3
Control-vs-T2DM	FB_Cluster_0	ENSMUSG00000046519	Golph3l	0.271496675	0.449721347	1078	775	0.054	0.102	0.727886311	6.69E-05	1	up	Golph3l
Control-vs-T2DM	FB_Cluster_0	ENSMUSG00000034518	Hmgxb4	0.38829255	0.533125135	1078	775	0.078	0.124	0.45722926	6.84E-05	1	up	Hmgxb4
Control-vs-T2DM	FB_Cluster_0	ENSMUSG00000029376	Mthfd2l	0.395339307	0.527570931	1078	775	0.076	0.119	0.416182223	7.46E-05	1	up	Mthfd2l
Control-vs-T2DM	FB_Cluster_0	ENSMUSG00000030257	Srgap3	0.33603578	0.476702502	1078	775	0.067	0.111	0.504347688	0.000109186	1	up	Srgap3
Control-vs-T2DM	FB_Cluster_0	ENSMUSG00000026532	Spta1	0.848255934	1.259197837	1078	775	0.135	0.203	0.569877946	0.000233829	1	up	Spta1
Control-vs-T2DM	FB_Cluster_0	ENSMUSG00000038384	Setd1b	0.316171699	0.431805228	1078	775	0.065	0.105	0.449550314	0.000247575	1	up	Setd1b
Control-vs-T2DM	FB_Cluster_0	ENSMUSG00000037035	Inhbb	0.251316029	0.40501368	1078	775	0.057	0.102	0.688250173	0.000255565	1	up	Inhbb
Control-vs-T2DM	FB_Cluster_0	ENSMUSG00000017132	Cyth1	0.286446395	0.415492573	1078	775	0.061	0.102	0.536401123	0.000284427	1	up	Cyth1
Control-vs-T2DM	FB_Cluster_0	ENSMUSG00000024598	Fbn2	0.716228356	1.047174674	1078	775	0.105	0.161	0.547946918	0.000373208	1	up	Fbn2
Control-vs-T2DM	FB_Cluster_0	ENSMUSG00000026455	Klhl12	0.313118749	0.496687003	1078	775	0.062	0.107	0.66545686	0.000498144	1	up	Klhl12
Control-vs-T2DM	FB_Cluster_0	ENSMUSG00000078677	Gm10974	0.375399965	0.497794423	1078	775	0.071	0.108	0.407027082	0.000635619	1	up	Gm10974
Control-vs-T2DM	FB_Cluster_0	ENSMUSG00000025323	Sp4	0.365057537	0.471274048	1078	775	0.071	0.107	0.368353322	0.000760362	1	up	Sp4
Control-vs-T2DM	FB_Cluster_0	ENSMUSG00000022360	Atad2	0.394067969	0.512282953	1078	775	0.08	0.117	0.378411934	0.001306826	1	up	Atad2
Control-vs-T2DM	FB_Cluster_0	ENSMUSG00000069670	Nkain2	5.880241343	9.746193504	1078	775	0.229	0.303	0.728953766	0.001462002	1	up	Nkain2
Control-vs-T2DM	FB_Cluster_0	ENSMUSG00000073590	3222401L13Rik	0.363897067	0.476413505	1078	775	0.072	0.11	0.388590276	0.001624871	1	up	3222401L13Rik
Control-vs-T2DM	FB_Cluster_0	ENSMUSG00000069520	Tmem19	0.333136422	0.529497568	1078	775	0.069	0.111	0.668350405	0.001836904	1	up	Tmem19
Control-vs-T2DM	FB_Cluster_0	ENSMUSG00000039804	Ncoa5	0.364343335	0.512049969	1078	775	0.081	0.123	0.490871809	0.002265258	1	up	Ncoa5
Control-vs-T2DM	FB_Cluster_0	ENSMUSG00000116673	A630089N07Rik	0.557897013	0.753498176	1078	775	0.108	0.155	0.433538073	0.002347683	1	up	A630089N07Rik
Control-vs-T2DM	FB_Cluster_0	ENSMUSG00000041144	Dnah7b	0.304251318	0.494393824	1078	775	0.061	0.102	0.700214891	0.002866576	1	up	Dnah7b
Control-vs-T2DM	FB_Cluster_0	ENSMUSG00000027737	Slc7a11	0.716293319	0.947900144	1078	775	0.12	0.165	0.404135394	0.005287417	1	up	Slc7a11
Control-vs-T2DM	FB_Cluster_0	ENSMUSG00000059921	Unc5c	0.456362636	0.645155832	1078	775	0.068	0.103	0.499374503	0.010887145	1	up	Unc5c
Control-vs-T2DM	FB_Cluster_0	ENSMUSG00000030760	Acer3	0.386739873	0.508378905	1078	775	0.078	0.111	0.394451417	0.015140919	1	up	Acer3
Control-vs-T2DM	FB_Cluster_1	ENSMUSG00000035161	Ints6	0.834734418	1.277924334	874	902	0.124	0.235	0.614353322	1.33E-13	4.05E-09	up	Ints6
Control-vs-T2DM	FB_Cluster_1	ENSMUSG00000086507	Adap2os	0.845225731	1.368664124	874	902	0.126	0.245	0.695294582	1.73E-13	5.27E-09	up	Adap2os
Control-vs-T2DM	FB_Cluster_1	ENSMUSG00000034021	Pds5b	1.316304967	1.732062544	874	902	0.198	0.318	0.395970942	1.87E-13	5.70E-09	up	Pds5b
Control-vs-T2DM	FB_Cluster_1	ENSMUSG00000022957	Itsn1	1.436570867	1.991896724	874	902	0.217	0.35	0.471485688	2.15E-13	6.55E-09	up	Itsn1
Control-vs-T2DM	FB_Cluster_1	ENSMUSG00000061665	Cd2ap	1.866299282	2.456217689	874	902	0.275	0.412	0.396239507	4.17E-13	1.27E-08	up	Cd2ap
Control-vs-T2DM	FB_Cluster_1	ENSMUSG00000026155	Smap1	0.858091936	1.126451114	874	902	0.138	0.234	0.392540524	4.43E-13	1.35E-08	up	Smap1
Control-vs-T2DM	FB_Cluster_1	ENSMUSG00000024949	Sf1	0.677201201	0.876422228	874	902	0.109	0.186	0.371993123	1.28E-12	3.90E-08	up	Sf1
Control-vs-T2DM	FB_Cluster_1	ENSMUSG00000018736	Ndel1	0.879688245	1.153627368	874	902	0.138	0.233	0.391074118	2.09E-12	6.36E-08	up	Ndel1
Control-vs-T2DM	FB_Cluster_1	ENSMUSG00000025217	Btrc	1.199451559	1.594168071	874	902	0.184	0.292	0.410399065	2.93E-12	8.93E-08	up	Btrc
Control-vs-T2DM	FB_Cluster_1	ENSMUSG00000004085	Map3k20	0.995380523	1.59105273	874	902	0.151	0.275	0.676607327	3.51E-12	1.07E-07	up	Map3k20
Control-vs-T2DM	FB_Cluster_1	ENSMUSG00000035901	Dennd5a	1.067759371	1.375875799	874	902	0.17	0.271	0.365733428	3.98E-12	1.21E-07	up	Dennd5a
Control-vs-T2DM	FB_Cluster_1	ENSMUSG00000022811	Zfp148	1.587482856	2.124028463	874	902	0.236	0.363	0.420039132	5.51E-12	1.68E-07	up	Zfp148
Control-vs-T2DM	FB_Cluster_1	ENSMUSG00000027799	Nbea	2.338674137	3.33562844	874	902	0.31	0.465	0.512249302	6.77E-12	2.06E-07	up	Nbea
Control-vs-T2DM	FB_Cluster_1	ENSMUSG00000064210	Ano6	1.49463705	2.18877768	874	902	0.231	0.37	0.550299623	6.84E-12	2.09E-07	up	Ano6
Control-vs-T2DM	FB_Cluster_1	ENSMUSG00000038024	Dennd4c	1.270116342	1.635858293	874	902	0.198	0.302	0.365061733	8.21E-12	2.50E-07	up	Dennd4c
Control-vs-T2DM	FB_Cluster_1	ENSMUSG00000020817	Rabep1	1.465830447	1.897072816	874	902	0.209	0.325	0.372034447	8.97E-12	2.74E-07	up	Rabep1
Control-vs-T2DM	FB_Cluster_1	ENSMUSG00000048027	Rgmb	0.802721318	1.148803487	874	902	0.133	0.231	0.517106779	2.99E-11	9.12E-07	up	Rgmb
Control-vs-T2DM	FB_Cluster_1	ENSMUSG00000031659	Adcy7	0.700747122	0.928473711	874	902	0.113	0.195	0.405916658	3.66E-11	1.12E-06	up	Adcy7
Control-vs-T2DM	FB_Cluster_1	ENSMUSG00000019467	Arhgef25	0.472934449	0.768442226	874	902	0.077	0.16	0.700179276	7.24E-11	2.21E-06	up	Arhgef25
Control-vs-T2DM	FB_Cluster_1	ENSMUSG00000042410	Agps	0.56440071	0.950412082	874	902	0.094	0.191	0.75172957	8.22E-11	2.51E-06	up	Agps
Control-vs-T2DM	FB_Cluster_1	ENSMUSG00000008200	Fnbp4	1.03475546	1.366286456	874	902	0.161	0.258	0.400936303	9.25E-11	2.82E-06	up	Fnbp4
Control-vs-T2DM	FB_Cluster_1	ENSMUSG00000049521	Cdc42ep1	0.338748224	0.630343582	874	902	0.057	0.135	0.895728062	1.04E-10	3.18E-06	up	Cdc42ep1
Control-vs-T2DM	FB_Cluster_1	ENSMUSG00000047036	Zfp445	1.016512119	1.319228898	874	902	0.159	0.251	0.376034927	1.10E-10	3.36E-06	up	Zfp445
Control-vs-T2DM	FB_Cluster_1	ENSMUSG00000039753	Fbxl5	0.551057944	0.730500686	874	902	0.092	0.162	0.406617299	1.20E-10	3.65E-06	up	Fbxl5
Control-vs-T2DM	FB_Cluster_1	ENSMUSG00000024589	Nedd4l	1.013248076	1.734549878	874	902	0.169	0.298	0.775514687	1.44E-10	4.39E-06	up	Nedd4l
Control-vs-T2DM	FB_Cluster_1	ENSMUSG00000045078	Rnf216	1.320325354	1.838062265	874	902	0.211	0.33	0.477261381	2.09E-10	6.38E-06	up	Rnf216
Control-vs-T2DM	FB_Cluster_1	ENSMUSG00000021759	Plpp1	1.932442084	2.667397997	874	902	0.275	0.409	0.464987357	3.56E-10	1.08E-05	up	Plpp1
Control-vs-T2DM	FB_Cluster_1	ENSMUSG00000020231	Dip2a	0.314813496	0.534118639	874	902	0.053	0.124	0.762474722	4.25E-10	1.29E-05	up	Dip2a
Control-vs-T2DM	FB_Cluster_1	ENSMUSG00000031714	Gab1	1.045207721	1.449316315	874	902	0.152	0.252	0.471544329	4.28E-10	1.31E-05	up	Gab1
Control-vs-T2DM	FB_Cluster_1	ENSMUSG00000026490	Cdc42bpa	1.913589013	2.527014667	874	902	0.271	0.392	0.401134727	4.78E-10	1.46E-05	up	Cdc42bpa
Control-vs-T2DM	FB_Cluster_1	ENSMUSG00000018160	Med1	0.426868577	0.635805754	874	902	0.072	0.142	0.574683067	5.18E-10	1.58E-05	up	Med1
Control-vs-T2DM	FB_Cluster_1	ENSMUSG00000006673	Qrich1	0.731165377	1.073591088	874	902	0.12	0.213	0.554112012	5.70E-10	1.74E-05	up	Qrich1
Control-vs-T2DM	FB_Cluster_1	ENSMUSG00000038495	Otud7b	0.674251056	0.94173763	874	902	0.108	0.188	0.481978536	6.37E-10	1.94E-05	up	Otud7b
Control-vs-T2DM	FB_Cluster_1	ENSMUSG00000052748	Swt1	0.937401439	1.364564178	874	902	0.146	0.247	0.541653161	7.09E-10	2.16E-05	up	Swt1
Control-vs-T2DM	FB_Cluster_1	ENSMUSG00000022788	Fgd4	0.777118684	1.05697479	874	902	0.113	0.194	0.443684966	7.13E-10	2.17E-05	up	Fgd4
Control-vs-T2DM	FB_Cluster_1	ENSMUSG00000018372	Cep95	0.335211	0.502662155	874	902	0.055	0.118	0.584376243	7.16E-10	2.18E-05	up	Cep95
Control-vs-T2DM	FB_Cluster_1	ENSMUSG00000024993	Fam45a	0.453993871	0.620680674	874	902	0.077	0.139	0.451093078	7.67E-10	2.34E-05	up	Fam45a
Control-vs-T2DM	FB_Cluster_1	ENSMUSG00000034850	Tmem127	0.400187076	0.59589333	874	902	0.066	0.133	0.57426115	1.12E-09	3.40E-05	up	Tmem127
Control-vs-T2DM	FB_Cluster_1	ENSMUSG00000046753	Ccdc66	0.603302868	0.863085401	874	902	0.096	0.175	0.516548912	1.18E-09	3.61E-05	up	Ccdc66
Control-vs-T2DM	FB_Cluster_1	ENSMUSG00000011158	Brf1	0.366533991	0.571624378	874	902	0.064	0.132	0.640979262	1.27E-09	3.87E-05	up	Brf1
Control-vs-T2DM	FB_Cluster_1	ENSMUSG00000036940	Kdm1a	0.92860151	1.340487188	874	902	0.157	0.257	0.529578165	1.40E-09	4.27E-05	up	Kdm1a
Control-vs-T2DM	FB_Cluster_1	ENSMUSG00000038679	Trps1	7.377643607	10.07124624	874	902	0.629	0.756	0.449004984	1.96E-09	5.98E-05	up	Trps1
Control-vs-T2DM	FB_Cluster_1	ENSMUSG00000048058	Ldlrad3	0.670612512	0.89311427	874	902	0.103	0.173	0.413311785	1.98E-09	6.02E-05	up	Ldlrad3
Control-vs-T2DM	FB_Cluster_1	ENSMUSG00000024104	Washc2	0.511770947	0.666832953	874	902	0.082	0.145	0.381761611	2.15E-09	6.54E-05	up	Washc2
Control-vs-T2DM	FB_Cluster_1	ENSMUSG00000025969	Nrp2	0.495579208	0.744066786	874	902	0.07	0.14	0.586219256	2.70E-09	8.22E-05	up	Nrp2
Control-vs-T2DM	FB_Cluster_1	ENSMUSG00000000976	Heatr6	0.374778233	0.535505245	874	902	0.063	0.122	0.514748032	2.85E-09	8.68E-05	up	Heatr6
Control-vs-T2DM	FB_Cluster_1	ENSMUSG00000018417	Myo1b	0.517252873	0.755923863	874	902	0.077	0.153	0.547283131	3.81E-09	0.000116124	up	Myo1b
Control-vs-T2DM	FB_Cluster_1	ENSMUSG00000042590	Ipo11	0.542187515	0.733133421	874	902	0.082	0.146	0.435214591	3.97E-09	0.000120909	up	Ipo11
Control-vs-T2DM	FB_Cluster_1	ENSMUSG00000020189	Osbpl8	0.98060528	1.260709166	874	902	0.159	0.242	0.362458378	4.10E-09	0.000124929	up	Osbpl8
Control-vs-T2DM	FB_Cluster_1	ENSMUSG00000031885	Cbfb	0.548400511	0.813634471	874	902	0.088	0.166	0.569065142	5.11E-09	0.000155647	up	Cbfb
Control-vs-T2DM	FB_Cluster_1	ENSMUSG00000031367	Ap1s2	0.324878229	0.529161344	874	902	0.056	0.12	0.703637215	7.55E-09	0.000230192	up	Ap1s2
Control-vs-T2DM	FB_Cluster_1	ENSMUSG00000040054	Baz2a	0.599471351	0.845753985	874	902	0.1	0.175	0.496477192	8.57E-09	0.000261185	up	Baz2a
Control-vs-T2DM	FB_Cluster_1	ENSMUSG00000070733	Fryl	1.102839689	1.495233507	874	902	0.178	0.274	0.439113384	9.89E-09	0.000301459	up	Fryl
Control-vs-T2DM	FB_Cluster_1	ENSMUSG00000020841	Cpd	0.762183101	1.049550387	874	902	0.125	0.205	0.461510082	1.03E-08	0.000312964	up	Cpd
Control-vs-T2DM	FB_Cluster_1	ENSMUSG00000026924	Sec16a	0.555244624	0.884279317	874	902	0.1	0.182	0.67128196	1.13E-08	0.000343502	up	Sec16a
Control-vs-T2DM	FB_Cluster_1	ENSMUSG00000015291	Gdi1	0.388351305	0.562066335	874	902	0.066	0.124	0.533263304	1.14E-08	0.000347324	up	Gdi1
Control-vs-T2DM	FB_Cluster_1	ENSMUSG00000026753	Ppp6c	0.465394997	0.658765719	874	902	0.077	0.139	0.501218803	1.16E-08	0.000354606	up	Ppp6c
Control-vs-T2DM	FB_Cluster_1	ENSMUSG00000042364	Snx18	0.674628957	0.991176351	874	902	0.119	0.204	0.554979235	1.21E-08	0.00036733	up	Snx18
Control-vs-T2DM	FB_Cluster_1	ENSMUSG00000042082	Arsb	0.410930288	0.640650407	874	902	0.064	0.129	0.640517783	1.50E-08	0.00045742	up	Arsb
Control-vs-T2DM	FB_Cluster_1	ENSMUSG00000054414	Slc30a7	0.40103043	0.529549439	874	902	0.062	0.116	0.400966379	1.56E-08	0.000475032	up	Slc30a7
Control-vs-T2DM	FB_Cluster_1	ENSMUSG00000035171	1110059E24Rik	0.350463082	0.652356694	874	902	0.056	0.129	0.896208073	1.63E-08	0.000496994	up	1110059E24Rik
Control-vs-T2DM	FB_Cluster_1	ENSMUSG00000027104	Atf2	1.084394549	1.484830721	874	902	0.168	0.265	0.453372822	1.66E-08	0.000506361	up	Atf2
Control-vs-T2DM	FB_Cluster_1	ENSMUSG00000086016	1700084C06Rik	0.346609895	0.530261164	874	902	0.057	0.116	0.613246125	2.00E-08	0.00060967	up	1700084C06Rik
Control-vs-T2DM	FB_Cluster_1	ENSMUSG00000028436	Dcaf12	0.295342018	0.470636544	874	902	0.049	0.104	0.672044834	2.12E-08	0.000647262	up	Dcaf12
Control-vs-T2DM	FB_Cluster_1	ENSMUSG00000032393	Dpp8	0.749419942	0.974433362	874	902	0.121	0.195	0.378744713	2.35E-08	0.000716378	up	Dpp8
Control-vs-T2DM	FB_Cluster_1	ENSMUSG00000029714	Gigyf1	0.302722572	0.433333214	874	902	0.05	0.101	0.517336964	2.41E-08	0.000735579	up	Gigyf1
Control-vs-T2DM	FB_Cluster_1	ENSMUSG00000034269	Setd5	2.891733358	3.855239722	874	902	0.405	0.539	0.414873573	2.69E-08	0.000818471	up	Setd5
Control-vs-T2DM	FB_Cluster_1	ENSMUSG00000038533	Cbfa2t2	0.968242859	1.309449963	874	902	0.154	0.239	0.435481249	3.08E-08	0.00093864	up	Cbfa2t2
Control-vs-T2DM	FB_Cluster_1	ENSMUSG00000036916	Zfp280c	0.339680297	0.575996511	874	902	0.058	0.123	0.761708324	3.09E-08	0.000940739	up	Zfp280c
Control-vs-T2DM	FB_Cluster_1	ENSMUSG00000029778	Adcyap1r1	0.359004111	0.470762412	874	902	0.061	0.111	0.39090339	3.11E-08	0.000947227	up	Adcyap1r1
Control-vs-T2DM	FB_Cluster_1	ENSMUSG00000021589	Rhobtb3	0.531171671	0.913138099	874	902	0.086	0.167	0.781541263	3.37E-08	0.001026777	up	Rhobtb3
Control-vs-T2DM	FB_Cluster_1	ENSMUSG00000054509	Parp4	0.643804427	0.91773421	874	902	0.108	0.182	0.511387012	3.54E-08	0.001080179	up	Parp4
Control-vs-T2DM	FB_Cluster_1	ENSMUSG00000029458	Brap	0.236335802	0.462315711	874	902	0.045	0.108	0.967741903	3.69E-08	0.001124166	up	Brap
Control-vs-T2DM	FB_Cluster_1	ENSMUSG00000022687	Boc	0.335444677	0.602607304	874	902	0.057	0.125	0.844952679	4.35E-08	0.001327358	up	Boc
Control-vs-T2DM	FB_Cluster_1	ENSMUSG00000024122	Pdpk1	0.6028871	0.885503512	874	902	0.105	0.183	0.554533806	4.39E-08	0.001337801	up	Pdpk1
Control-vs-T2DM	FB_Cluster_1	ENSMUSG00000027852	Nras	0.393326247	0.655978773	874	902	0.068	0.137	0.737775838	4.76E-08	0.001449878	up	Nras
Control-vs-T2DM	FB_Cluster_1	ENSMUSG00000000194	Gpr107	0.566832872	0.799505705	874	902	0.1	0.171	0.496110842	5.17E-08	0.001576359	up	Gpr107
Control-vs-T2DM	FB_Cluster_1	ENSMUSG00000043019	Edem3	0.573147037	0.83012714	874	902	0.097	0.169	0.5343491	5.27E-08	0.001607253	up	Edem3
Control-vs-T2DM	FB_Cluster_1	ENSMUSG00000034663	Bmp2k	0.41670731	0.595613706	874	902	0.066	0.126	0.51523857	5.86E-08	0.001784853	up	Bmp2k
Control-vs-T2DM	FB_Cluster_1	ENSMUSG00000039599	Fam149b	0.472622773	0.694147085	874	902	0.079	0.145	0.554454848	6.07E-08	0.001849301	up	Fam149b
Control-vs-T2DM	FB_Cluster_1	ENSMUSG00000026384	Ptpn4	0.466391636	0.695425766	874	902	0.073	0.137	0.576252747	9.79E-08	0.002984349	up	Ptpn4
Control-vs-T2DM	FB_Cluster_1	ENSMUSG00000032875	Arhgef17	0.341903403	0.45425427	874	902	0.055	0.105	0.409806956	1.04E-07	0.003171493	up	Arhgef17
Control-vs-T2DM	FB_Cluster_1	ENSMUSG00000021745	Ptprg	2.316698293	3.100427057	874	902	0.32	0.441	0.420381034	1.05E-07	0.003194719	up	Ptprg
Control-vs-T2DM	FB_Cluster_1	ENSMUSG00000038518	Jarid2	1.266654989	1.633554303	874	902	0.199	0.288	0.366965217	1.18E-07	0.003581559	up	Jarid2
Control-vs-T2DM	FB_Cluster_1	ENSMUSG00000074264	Amy1	0.488189936	0.742665707	874	902	0.07	0.133	0.605169166	1.43E-07	0.004363562	up	Amy1
Control-vs-T2DM	FB_Cluster_1	ENSMUSG00000037692	Ahdc1	0.460299521	0.707389629	874	902	0.081	0.151	0.619822667	1.54E-07	0.004681296	up	Ahdc1
Control-vs-T2DM	FB_Cluster_1	ENSMUSG00000042035	Igsf3	0.630009713	0.895366319	874	902	0.105	0.176	0.50703612	1.58E-07	0.004817011	up	Igsf3
Control-vs-T2DM	FB_Cluster_1	ENSMUSG00000039828	Wdr70	0.758694535	1.05652607	874	902	0.128	0.207	0.477683718	1.62E-07	0.004928377	up	Wdr70
Control-vs-T2DM	FB_Cluster_1	ENSMUSG00000010453	Kansl3	0.443445368	0.659332942	874	902	0.08	0.143	0.572144283	1.73E-07	0.005285353	up	Kansl3
Control-vs-T2DM	FB_Cluster_1	ENSMUSG00000028980	H6pd	0.51299861	0.742234273	874	902	0.089	0.156	0.532832863	1.83E-07	0.005584445	up	H6pd
Control-vs-T2DM	FB_Cluster_1	ENSMUSG00000035139	Secisbp2	0.385833849	0.572950252	874	902	0.069	0.127	0.570308074	1.85E-07	0.005641327	up	Secisbp2
Control-vs-T2DM	FB_Cluster_1	ENSMUSG00000034390	Cmip	0.97626137	1.275337772	874	902	0.168	0.247	0.385505391	2.03E-07	0.006187521	up	Cmip
Control-vs-T2DM	FB_Cluster_1	ENSMUSG00000024826	Dpf2	0.344293084	0.52322726	874	902	0.058	0.113	0.603657237	2.26E-07	0.006899443	up	Dpf2
Control-vs-T2DM	FB_Cluster_1	ENSMUSG00000063810	Alms1	0.549491677	0.799440017	874	902	0.078	0.143	0.540810086	2.31E-07	0.007054374	up	Alms1
Control-vs-T2DM	FB_Cluster_1	ENSMUSG00000027751	Supt20	0.776240275	1.045614099	874	902	0.127	0.201	0.42972743	2.32E-07	0.007064351	up	Supt20
Control-vs-T2DM	FB_Cluster_1	ENSMUSG00000020184	Mdm2	0.385717027	0.513344292	874	902	0.068	0.119	0.412290943	2.50E-07	0.007608469	up	Mdm2
Control-vs-T2DM	FB_Cluster_1	ENSMUSG00000036275	9530068E07Rik	0.446442294	0.601314388	874	902	0.081	0.136	0.429562558	2.84E-07	0.008665325	up	9530068E07Rik
Control-vs-T2DM	FB_Cluster_1	ENSMUSG00000052298	Cdc42se2	0.569624463	0.862920229	874	902	0.095	0.165	0.599130022	3.53E-07	0.010772987	up	Cdc42se2
Control-vs-T2DM	FB_Cluster_1	ENSMUSG00000031446	Cul4a	0.45011623	0.59021596	874	902	0.078	0.13	0.390869282	4.53E-07	0.013802179	up	Cul4a
Control-vs-T2DM	FB_Cluster_1	ENSMUSG00000059975	Zfp74	0.291702239	0.48094606	874	902	0.051	0.106	0.721184087	4.63E-07	0.014106971	up	Zfp74
Control-vs-T2DM	FB_Cluster_1	ENSMUSG00000068742	Cry2	0.327189904	0.481937876	874	902	0.054	0.104	0.558577409	4.73E-07	0.01440447	up	Cry2
Control-vs-T2DM	FB_Cluster_1	ENSMUSG00000042625	Safb2	0.722337004	0.998114128	874	902	0.124	0.196	0.466477531	4.74E-07	0.01445574	up	Safb2
Control-vs-T2DM	FB_Cluster_1	ENSMUSG00000026767	Mindy3	0.517483681	0.756371902	874	902	0.088	0.153	0.547494366	6.03E-07	0.01836637	up	Mindy3
Control-vs-T2DM	FB_Cluster_1	ENSMUSG00000057722	Lepr	0.489985399	0.864408301	874	902	0.081	0.156	0.818846651	7.13E-07	0.02172076	up	Lepr
Control-vs-T2DM	FB_Cluster_1	ENSMUSG00000045103	Dmd	1.33248996	1.814202005	874	902	0.206	0.289	0.445181695	7.81E-07	0.023813338	up	Dmd
Control-vs-T2DM	FB_Cluster_1	ENSMUSG00000097546	Gm26749	1.015062539	1.314629362	874	902	0.15	0.224	0.373055113	1.10E-06	0.033539971	up	Gm26749
Control-vs-T2DM	FB_Cluster_1	ENSMUSG00000069089	Cdk7	0.461120993	0.735066229	874	902	0.08	0.146	0.672612314	1.16E-06	0.035318338	up	Cdk7
Control-vs-T2DM	FB_Cluster_1	ENSMUSG00000025013	Tll2	0.31963682	0.507574548	874	902	0.05	0.104	0.667019045	1.23E-06	0.037376611	up	Tll2
Control-vs-T2DM	FB_Cluster_1	ENSMUSG00000003031	Cdkn1b	0.744000489	1.026515193	874	902	0.132	0.205	0.464326144	1.36E-06	0.041365074	up	Cdkn1b
Control-vs-T2DM	FB_Cluster_1	ENSMUSG00000068250	Amn1	0.657296364	0.90047988	874	902	0.108	0.173	0.454090769	1.47E-06	0.044901608	up	Amn1
Control-vs-T2DM	FB_Cluster_1	ENSMUSG00000097820	E530011L22Rik	0.619374015	0.823674758	874	902	0.103	0.165	0.411206154	1.62E-06	0.049223636	up	E530011L22Rik
Control-vs-T2DM	FB_Cluster_1	ENSMUSG00000036792	Mbd5	2.424417804	3.136809518	874	902	0.325	0.433	0.371646068	1.64E-06	0.049847867	up	Mbd5
Control-vs-T2DM	FB_Cluster_1	ENSMUSG00000031015	Swap70	0.411651914	0.580412051	874	902	0.065	0.115	0.495550659	1.72E-06	0.05254515	up	Swap70
Control-vs-T2DM	FB_Cluster_1	ENSMUSG00000027652	Ralgapb	0.900425668	1.19167456	874	902	0.153	0.225	0.404272054	1.83E-06	0.055899691	up	Ralgapb
Control-vs-T2DM	FB_Cluster_1	ENSMUSG00000074749	Kiz	0.774984274	1.116426204	874	902	0.132	0.208	0.526592023	1.87E-06	0.057125337	up	Kiz
Control-vs-T2DM	FB_Cluster_1	ENSMUSG00000027340	Slc23a2	0.621730322	0.883244706	874	902	0.112	0.181	0.50645556	2.22E-06	0.067550126	up	Slc23a2
Control-vs-T2DM	FB_Cluster_1	ENSMUSG00000028228	Cpne3	0.573799138	0.878142041	874	902	0.098	0.169	0.613821391	2.23E-06	0.068055707	up	Cpne3
Control-vs-T2DM	FB_Cluster_1	ENSMUSG00000036779	Tent4b	0.576515389	0.879548491	874	902	0.096	0.166	0.609317796	2.30E-06	0.069988064	up	Tent4b
Control-vs-T2DM	FB_Cluster_1	ENSMUSG00000021464	Ror2	1.048136435	1.437186929	874	902	0.162	0.243	0.455383939	2.34E-06	0.071256303	up	Ror2
Control-vs-T2DM	FB_Cluster_1	ENSMUSG00000034187	Nsf	0.651738876	0.920177997	874	902	0.109	0.176	0.497554337	2.56E-06	0.07803645	up	Nsf
Control-vs-T2DM	FB_Cluster_1	ENSMUSG00000053877	Srcap	0.332144293	0.572960856	874	902	0.061	0.12	0.786443938	2.97E-06	0.090394189	up	Srcap
Control-vs-T2DM	FB_Cluster_1	ENSMUSG00000023764	Sfi1	0.365712979	0.659529115	874	902	0.063	0.126	0.850548815	3.07E-06	0.09358043	up	Sfi1
Control-vs-T2DM	FB_Cluster_1	ENSMUSG00000027166	Dnajc24	0.433053291	0.601380478	874	902	0.072	0.124	0.473640234	3.94E-06	0.120197824	up	Dnajc24
Control-vs-T2DM	FB_Cluster_1	ENSMUSG00000050697	Prkaa1	0.331777481	0.506670529	874	902	0.053	0.102	0.610681887	3.96E-06	0.120704255	up	Prkaa1
Control-vs-T2DM	FB_Cluster_1	ENSMUSG00000038271	Iffo1	0.424483611	0.609017961	874	902	0.072	0.126	0.520672962	4.13E-06	0.125912246	up	Iffo1
Control-vs-T2DM	FB_Cluster_1	ENSMUSG00000033792	Atp7a	0.663246478	0.865603652	874	902	0.113	0.17	0.384110632	5.16E-06	0.157377932	up	Atp7a
Control-vs-T2DM	FB_Cluster_1	ENSMUSG00000031370	Zrsr2	0.466246628	0.614305929	874	902	0.077	0.126	0.397789453	5.58E-06	0.170094388	up	Zrsr2
Control-vs-T2DM	FB_Cluster_1	ENSMUSG00000044906	4930503L19Rik	0.380255272	0.525813289	874	902	0.063	0.109	0.46747735	5.71E-06	0.174134417	up	4930503L19Rik
Control-vs-T2DM	FB_Cluster_1	ENSMUSG00000000531	Grasp	0.432348825	0.632157139	874	902	0.074	0.129	0.547982005	6.75E-06	0.20575339	up	Grasp
Control-vs-T2DM	FB_Cluster_1	ENSMUSG00000048661	Lemd3	0.463549874	0.597429706	874	902	0.077	0.124	0.365974676	7.02E-06	0.213882652	up	Lemd3
Control-vs-T2DM	FB_Cluster_1	ENSMUSG00000028252	Ccnc	0.361883588	0.488361724	874	902	0.059	0.105	0.432321225	7.28E-06	0.221979963	up	Ccnc
Control-vs-T2DM	FB_Cluster_1	ENSMUSG00000026436	Elk4	0.516153332	0.753348564	874	902	0.094	0.156	0.545429837	7.41E-06	0.225726387	up	Elk4
Control-vs-T2DM	FB_Cluster_1	ENSMUSG00000075284	Wipf1	2.264028062	2.986884905	874	902	0.322	0.422	0.399734386	7.67E-06	0.233637179	up	Wipf1
Control-vs-T2DM	FB_Cluster_1	ENSMUSG00000004568	Arhgef18	0.39796182	0.626352095	874	902	0.07	0.127	0.654211688	7.69E-06	0.234506892	up	Arhgef18
Control-vs-T2DM	FB_Cluster_1	ENSMUSG00000033364	Usp37	0.760905542	1.067877256	874	902	0.125	0.196	0.488902057	7.96E-06	0.24248815	up	Usp37
Control-vs-T2DM	FB_Cluster_1	ENSMUSG00000025782	Taf3	0.758102984	1.002524897	874	902	0.121	0.183	0.403125925	8.35E-06	0.254364622	up	Taf3
Control-vs-T2DM	FB_Cluster_1	ENSMUSG00000068196	Col8a1	7.249565478	9.449315188	874	902	0.515	0.624	0.382310619	8.60E-06	0.262114368	up	Col8a1
Control-vs-T2DM	FB_Cluster_1	ENSMUSG00000020056	Washc3	0.255428816	0.532580677	874	902	0.046	0.102	1.059784955	9.18E-06	0.279688174	up	Washc3
Control-vs-T2DM	FB_Cluster_1	ENSMUSG00000029438	Bcl7a	0.289874521	0.495369396	874	902	0.051	0.103	0.772869806	1.29E-05	0.39185252	up	Bcl7a
Control-vs-T2DM	FB_Cluster_1	ENSMUSG00000038025	Phf2	0.34924697	0.470880831	874	902	0.066	0.11	0.431007716	1.49E-05	0.454863979	up	Phf2
Control-vs-T2DM	FB_Cluster_1	ENSMUSG00000021548	Ccnh	0.767967891	1.020768612	874	902	0.132	0.194	0.410491457	1.63E-05	0.497938425	up	Ccnh
Control-vs-T2DM	FB_Cluster_1	ENSMUSG00000020097	Sgpl1	0.425438752	0.553820722	874	902	0.077	0.121	0.380388993	1.66E-05	0.50689217	up	Sgpl1
Control-vs-T2DM	FB_Cluster_1	ENSMUSG00000021112	Mpp5	0.41789576	0.582912678	874	902	0.071	0.119	0.480038946	1.68E-05	0.510660767	up	Mpp5
Control-vs-T2DM	FB_Cluster_1	ENSMUSG00000032340	Neo1	0.541535537	0.770461372	874	902	0.09	0.146	0.508587469	1.90E-05	0.579599295	up	Neo1
Control-vs-T2DM	FB_Cluster_1	ENSMUSG00000026718	Stam	0.565989115	0.813183468	874	902	0.097	0.156	0.522729104	1.94E-05	0.591520503	up	Stam
Control-vs-T2DM	FB_Cluster_1	ENSMUSG00000033790	Tubgcp5	0.475385405	0.745478912	874	902	0.081	0.14	0.648959998	2.45E-05	0.745231854	up	Tubgcp5
Control-vs-T2DM	FB_Cluster_1	ENSMUSG00000039988	Ankrd13c	0.55692118	0.728039393	874	902	0.097	0.149	0.386482478	2.49E-05	0.75772278	up	Ankrd13c
Control-vs-T2DM	FB_Cluster_1	ENSMUSG00000052656	Rnf103	0.386946733	0.527279185	874	902	0.07	0.113	0.446332859	2.50E-05	0.763268137	up	Rnf103
Control-vs-T2DM	FB_Cluster_1	ENSMUSG00000056537	Rlim	0.354293287	0.488842453	874	902	0.062	0.104	0.464313398	2.61E-05	0.796122002	up	Rlim
Control-vs-T2DM	FB_Cluster_1	ENSMUSG00000032558	Nphp3	0.326545564	0.490238918	874	902	0.062	0.11	0.586053223	3.03E-05	0.92232757	up	Nphp3
Control-vs-T2DM	FB_Cluster_1	ENSMUSG00000028854	Slc9a1	0.358026749	0.508838962	874	902	0.065	0.112	0.507022363	3.91E-05	1	up	Slc9a1
Control-vs-T2DM	FB_Cluster_1	ENSMUSG00000047412	Zbtb44	0.542353489	0.784402895	874	902	0.094	0.153	0.532279327	4.24E-05	1	up	Zbtb44
Control-vs-T2DM	FB_Cluster_1	ENSMUSG00000047368	Abhd17b	0.703189142	1.006030287	874	902	0.116	0.18	0.516627287	5.35E-05	1	up	Abhd17b
Control-vs-T2DM	FB_Cluster_1	ENSMUSG00000035572	Dcaf10	0.641750621	0.829797189	874	902	0.098	0.15	0.370695047	5.73E-05	1	up	Dcaf10
Control-vs-T2DM	FB_Cluster_1	ENSMUSG00000036435	Exoc1	0.308729116	0.500597327	874	902	0.058	0.109	0.69712998	5.85E-05	1	up	Exoc1
Control-vs-T2DM	FB_Cluster_1	ENSMUSG00000069094	Pde7a	0.584194461	0.815018879	874	902	0.095	0.15	0.480314868	6.00E-05	1	up	Pde7a
Control-vs-T2DM	FB_Cluster_1	ENSMUSG00000026768	Itga8	0.584439976	0.838113877	874	902	0.096	0.155	0.520016714	6.10E-05	1	up	Itga8
Control-vs-T2DM	FB_Cluster_1	ENSMUSG00000024395	Lims2	0.492091108	0.653393721	874	902	0.08	0.125	0.40895478	6.31E-05	1	up	Lims2
Control-vs-T2DM	FB_Cluster_1	ENSMUSG00000017929	B4galt5	0.338587991	0.514861358	874	902	0.057	0.102	0.604507346	6.33E-05	1	up	B4galt5
Control-vs-T2DM	FB_Cluster_1	ENSMUSG00000046985	Tapt1	0.452699802	0.582223285	874	902	0.076	0.115	0.36294698	8.34E-05	1	up	Tapt1
Control-vs-T2DM	FB_Cluster_1	ENSMUSG00000037306	Man1c1	0.488921794	0.680261164	874	902	0.087	0.136	0.476402031	8.62E-05	1	up	Man1c1
Control-vs-T2DM	FB_Cluster_1	ENSMUSG00000038332	Sesn1	0.892889603	1.377907771	874	902	0.144	0.221	0.625868741	9.54E-05	1	up	Sesn1
Control-vs-T2DM	FB_Cluster_1	ENSMUSG00000060679	Mrps9	0.407211185	0.636093211	874	902	0.074	0.126	0.643333543	0.000102211	1	up	Mrps9
Control-vs-T2DM	FB_Cluster_1	ENSMUSG00000089872	Rps6kc1	0.40185146	0.536647172	874	902	0.076	0.119	0.417221395	0.000106304	1	up	Rps6kc1
Control-vs-T2DM	FB_Cluster_1	ENSMUSG00000034342	Cbl	0.562325208	0.785307991	874	902	0.1	0.156	0.48178102	0.000109761	1	up	Cbl
Control-vs-T2DM	FB_Cluster_1	ENSMUSG00000038563	Efl1	0.427551651	0.561012572	874	902	0.069	0.108	0.391854129	0.000111248	1	up	Efl1
Control-vs-T2DM	FB_Cluster_1	ENSMUSG00000019768	Esr1	0.393004093	0.632685918	874	902	0.058	0.109	0.68680611	0.000147865	1	up	Esr1
Control-vs-T2DM	FB_Cluster_1	ENSMUSG00000110105	Gm45844	0.329353717	0.535990082	874	902	0.062	0.11	0.70239964	0.00017054	1	up	Gm45844
Control-vs-T2DM	FB_Cluster_1	ENSMUSG00000022848	Slc49a4	0.458472894	0.623152412	874	902	0.076	0.119	0.442665479	0.000178593	1	up	Slc49a4
Control-vs-T2DM	FB_Cluster_1	ENSMUSG00000000131	Xpo6	0.399048126	0.591594834	874	902	0.07	0.116	0.567929062	0.000230733	1	up	Xpo6
Control-vs-T2DM	FB_Cluster_1	ENSMUSG00000031657	Heatr3	0.344099307	0.47726461	874	902	0.063	0.103	0.471847421	0.000242438	1	up	Heatr3
Control-vs-T2DM	FB_Cluster_1	ENSMUSG00000086433	Rsf1os1	0.40058297	0.555301144	874	902	0.069	0.112	0.471068956	0.000315407	1	up	Rsf1os1
Control-vs-T2DM	FB_Cluster_1	ENSMUSG00000009394	Syn2	0.532151691	0.691751364	874	902	0.071	0.113	0.378353499	0.00033553	1	up	Syn2
Control-vs-T2DM	FB_Cluster_1	ENSMUSG00000020462	Cfap36	0.430077733	0.578186915	874	902	0.071	0.113	0.426852609	0.000476384	1	up	Cfap36
Control-vs-T2DM	FB_Cluster_1	ENSMUSG00000060992	Copz1	0.377804774	0.519542622	874	902	0.07	0.112	0.459497025	0.000496595	1	up	Copz1
Control-vs-T2DM	FB_Cluster_1	ENSMUSG00000040414	Slc25a28	0.362426968	0.50184848	874	902	0.064	0.104	0.469450975	0.000559788	1	up	Slc25a28
Control-vs-T2DM	FB_Cluster_1	ENSMUSG00000030435	U2af2	0.322430965	0.509918237	874	902	0.062	0.105	0.66111116	0.000719431	1	up	U2af2
Control-vs-T2DM	FB_Cluster_1	ENSMUSG00000115433	Gm49267	0.385356626	0.644224788	874	902	0.063	0.111	0.74121957	0.000782651	1	up	Gm49267
Control-vs-T2DM	FB_Cluster_1	ENSMUSG00000025937	Lactb2	0.399779146	0.520388469	874	902	0.07	0.108	0.380302155	0.000988804	1	up	Lactb2
Control-vs-T2DM	FB_Cluster_1	ENSMUSG00000032086	Bace1	0.383683819	0.500619548	874	902	0.068	0.103	0.383708892	0.00163608	1	up	Bace1
Control-vs-T2DM	FB_Cluster_1	ENSMUSG00000051331	Cacna1c	1.271832731	1.735220323	874	902	0.184	0.248	0.448179622	0.002800503	1	up	Cacna1c
Control-vs-T2DM	FB_Cluster_1	ENSMUSG00000085793	Lin52	0.471967272	0.628279332	874	902	0.073	0.11	0.412643264	0.004659226	1	up	Lin52
Control-vs-T2DM	FB_Cluster_1	ENSMUSG00000056899	Immp2l	0.805829877	1.097339045	874	902	0.104	0.142	0.445414588	0.035369371	1	up	Immp2l
Control-vs-T2DM	FB_Cluster_2	ENSMUSG00000005417	Mprip	1.806529459	2.525834266	586	489	0.334	0.536	0.483516457	9.83E-13	3.00E-08	up	Mprip
Control-vs-T2DM	FB_Cluster_2	ENSMUSG00000036879	Phkb	1.103430004	1.507732535	586	489	0.206	0.354	0.450350351	8.98E-11	2.74E-06	up	Phkb
Control-vs-T2DM	FB_Cluster_2	ENSMUSG00000022280	Rnf19a	0.629402447	0.917154585	586	489	0.131	0.252	0.543110224	1.90E-10	5.79E-06	up	Rnf19a
Control-vs-T2DM	FB_Cluster_2	ENSMUSG00000038145	Snrk	0.765684951	1.181489026	586	489	0.166	0.309	0.625717118	2.16E-10	6.58E-06	up	Snrk
Control-vs-T2DM	FB_Cluster_2	ENSMUSG00000031392	Irak1	0.51983109	0.77014109	586	489	0.118	0.229	0.566989663	9.88E-10	3.01E-05	up	Irak1
Control-vs-T2DM	FB_Cluster_2	ENSMUSG00000026643	Nmt2	0.771263045	1.050902319	586	489	0.162	0.278	0.446283919	2.36E-09	7.19E-05	up	Nmt2
Control-vs-T2DM	FB_Cluster_2	ENSMUSG00000022536	Glyr1	0.712247446	0.957917872	586	489	0.148	0.256	0.427471486	3.06E-09	9.34E-05	up	Glyr1
Control-vs-T2DM	FB_Cluster_2	ENSMUSG00000028173	Wls	2.019304683	2.649957819	586	489	0.379	0.544	0.392093785	3.40E-09	0.000103701	up	Wls
Control-vs-T2DM	FB_Cluster_2	ENSMUSG00000020986	Sec23a	0.776832126	1.01765492	586	489	0.172	0.28	0.389529722	4.28E-09	0.000130404	up	Sec23a
Control-vs-T2DM	FB_Cluster_2	ENSMUSG00000017686	Rhot1	0.56432589	0.791500796	586	489	0.126	0.227	0.487988898	4.88E-09	0.000148716	up	Rhot1
Control-vs-T2DM	FB_Cluster_2	ENSMUSG00000027665	Pik3ca	0.951271902	1.311441024	586	489	0.196	0.325	0.463181612	6.60E-09	0.000201277	up	Pik3ca
Control-vs-T2DM	FB_Cluster_2	ENSMUSG00000030536	Iqgap1	1.675316734	2.2695666	586	489	0.316	0.472	0.437960401	7.89E-09	0.000240488	up	Iqgap1
Control-vs-T2DM	FB_Cluster_2	ENSMUSG00000000693	Loxl3	0.381697991	0.490436434	586	489	0.077	0.147	0.361550785	8.21E-09	0.000250182	up	Loxl3
Control-vs-T2DM	FB_Cluster_2	ENSMUSG00000022443	Myh9	0.850570895	1.235677819	586	489	0.174	0.305	0.538746384	1.23E-08	0.000375243	up	Myh9
Control-vs-T2DM	FB_Cluster_2	ENSMUSG00000042323	Pbrm1	1.237855608	1.800077481	586	489	0.251	0.405	0.540179568	1.76E-08	0.000536154	up	Pbrm1
Control-vs-T2DM	FB_Cluster_2	ENSMUSG00000026150	Mff	0.494221818	0.756944342	586	489	0.118	0.223	0.61492722	2.83E-08	0.00086333	up	Mff
Control-vs-T2DM	FB_Cluster_2	ENSMUSG00000066036	Ubr4	0.593894631	0.921580819	586	489	0.128	0.243	0.633817336	3.08E-08	0.000939958	up	Ubr4
Control-vs-T2DM	FB_Cluster_2	ENSMUSG00000031337	Mtm1	0.372055641	0.630499189	586	489	0.077	0.172	0.760817212	4.23E-08	0.001290487	up	Mtm1
Control-vs-T2DM	FB_Cluster_2	ENSMUSG00000014355	Anapc1	0.624341171	0.830275962	586	489	0.131	0.225	0.411199018	5.85E-08	0.001783047	up	Anapc1
Control-vs-T2DM	FB_Cluster_2	ENSMUSG00000010045	Tmem115	0.193790896	0.405295163	586	489	0.043	0.121	1.06408381	5.95E-08	0.001813903	up	Tmem115
Control-vs-T2DM	FB_Cluster_2	ENSMUSG00000006276	Eps15l1	0.558150829	0.719340542	586	489	0.121	0.204	0.365961972	8.89E-08	0.002710294	up	Eps15l1
Control-vs-T2DM	FB_Cluster_2	ENSMUSG00000059146	Ntrk3	0.277925043	0.80174224	586	489	0.061	0.17	1.528103581	1.08E-07	0.003285636	up	Ntrk3
Control-vs-T2DM	FB_Cluster_2	ENSMUSG00000025790	Slco3a1	2.968379188	4.05395631	586	489	0.473	0.64	0.449642129	1.16E-07	0.003550135	up	Slco3a1
Control-vs-T2DM	FB_Cluster_2	ENSMUSG00000062627	Mysm1	0.709286481	1.042466328	586	489	0.157	0.272	0.55549543	1.25E-07	0.003804522	up	Mysm1
Control-vs-T2DM	FB_Cluster_2	ENSMUSG00000031521	Aga	0.483171651	0.65945065	586	489	0.101	0.182	0.448649088	1.31E-07	0.003994091	up	Aga
Control-vs-T2DM	FB_Cluster_2	ENSMUSG00000038181	Chpf2	0.276007518	0.497517848	586	489	0.06	0.139	0.849808064	1.36E-07	0.004135612	up	Chpf2
Control-vs-T2DM	FB_Cluster_2	ENSMUSG00000000420	Galnt1	1.319785653	1.700234712	586	489	0.259	0.387	0.365405821	1.41E-07	0.004295522	up	Galnt1
Control-vs-T2DM	FB_Cluster_2	ENSMUSG00000035781	R3hdm4	0.188052797	0.35005865	586	489	0.041	0.11	0.896103992	1.67E-07	0.005104092	up	R3hdm4
Control-vs-T2DM	FB_Cluster_2	ENSMUSG00000025104	Hdgfl3	0.79437247	1.07971804	586	489	0.16	0.268	0.44271909	1.70E-07	0.005191397	up	Hdgfl3
Control-vs-T2DM	FB_Cluster_2	ENSMUSG00000058388	Phtf1	0.514803704	0.687400529	586	489	0.108	0.188	0.417058177	1.85E-07	0.005639548	up	Phtf1
Control-vs-T2DM	FB_Cluster_2	ENSMUSG00000053754	Chd8	0.692287829	0.889695283	586	489	0.159	0.252	0.361893086	2.50E-07	0.007632402	up	Chd8
Control-vs-T2DM	FB_Cluster_2	ENSMUSG00000003435	Supt5	0.412747282	0.604517005	586	489	0.096	0.176	0.550413348	2.79E-07	0.008497906	up	Supt5
Control-vs-T2DM	FB_Cluster_2	ENSMUSG00000062866	Phactr2	0.651175799	1.030271517	586	489	0.148	0.266	0.661824095	2.93E-07	0.008924048	up	Phactr2
Control-vs-T2DM	FB_Cluster_2	ENSMUSG00000046230	Vps13a	0.90469774	1.371398587	586	489	0.183	0.311	0.600085905	3.20E-07	0.009761535	up	Vps13a
Control-vs-T2DM	FB_Cluster_2	ENSMUSG00000022601	Zbtb11	0.41089101	0.584900835	586	489	0.09	0.172	0.509331847	3.27E-07	0.009966607	up	Zbtb11
Control-vs-T2DM	FB_Cluster_2	ENSMUSG00000049354	Dcaf7	0.335289559	0.439479085	586	489	0.073	0.133	0.390284967	3.59E-07	0.010945845	up	Dcaf7
Control-vs-T2DM	FB_Cluster_2	ENSMUSG00000032624	Eml4	0.800876722	1.137364687	586	489	0.181	0.297	0.505989536	3.89E-07	0.011868307	up	Eml4
Control-vs-T2DM	FB_Cluster_2	ENSMUSG00000003161	Sri	0.590589457	0.784114048	586	489	0.14	0.227	0.408847624	4.36E-07	0.013299642	up	Sri
Control-vs-T2DM	FB_Cluster_2	ENSMUSG00000042292	Mrtfa	1.015172017	1.337192386	586	489	0.21	0.325	0.397448617	4.43E-07	0.013501558	up	Mrtfa
Control-vs-T2DM	FB_Cluster_2	ENSMUSG00000025558	Dock9	0.61341446	0.86988112	586	489	0.13	0.229	0.503886746	4.53E-07	0.013816283	up	Dock9
Control-vs-T2DM	FB_Cluster_2	ENSMUSG00000029913	Prdm5	0.929227591	1.269443979	586	489	0.191	0.305	0.450051227	4.72E-07	0.014401248	up	Prdm5
Control-vs-T2DM	FB_Cluster_2	ENSMUSG00000024276	Zfp397	0.494845517	0.681812297	586	489	0.109	0.188	0.462316477	4.87E-07	0.014833177	up	Zfp397
Control-vs-T2DM	FB_Cluster_2	ENSMUSG00000053441	Adamts19	0.430239062	0.709730403	586	489	0.08	0.17	0.722000569	5.01E-07	0.015268921	up	Adamts19
Control-vs-T2DM	FB_Cluster_2	ENSMUSG00000025860	Xiap	0.926634917	1.215382313	586	489	0.186	0.297	0.391300265	5.16E-07	0.015722006	up	Xiap
Control-vs-T2DM	FB_Cluster_2	ENSMUSG00000000826	Dnajc5	0.447499757	0.723082477	586	489	0.096	0.186	0.692150466	5.85E-07	0.017836496	up	Dnajc5
Control-vs-T2DM	FB_Cluster_2	ENSMUSG00000044548	Dact1	0.606620852	0.834142521	586	489	0.119	0.209	0.459433951	5.94E-07	0.018118908	up	Dact1
Control-vs-T2DM	FB_Cluster_2	ENSMUSG00000016087	Fli1	0.450224435	0.583105427	586	489	0.087	0.157	0.373039382	6.09E-07	0.018546593	up	Fli1
Control-vs-T2DM	FB_Cluster_2	ENSMUSG00000010025	Aldh3a2	0.271712574	0.373323186	586	489	0.061	0.119	0.458199312	6.33E-07	0.019284495	up	Aldh3a2
Control-vs-T2DM	FB_Cluster_2	ENSMUSG00000057691	Zfp746	0.228592489	0.376008506	586	489	0.049	0.112	0.717739953	6.77E-07	0.020644373	up	Zfp746
Control-vs-T2DM	FB_Cluster_2	ENSMUSG00000034248	Slc25a37	0.227996917	0.34832438	586	489	0.049	0.108	0.611198633	8.17E-07	0.02490533	up	Slc25a37
Control-vs-T2DM	FB_Cluster_2	ENSMUSG00000024943	Smc5	0.945412869	1.255650647	586	489	0.198	0.307	0.409381019	8.94E-07	0.027245008	up	Smc5
Control-vs-T2DM	FB_Cluster_2	ENSMUSG00000039461	Tcta	0.378385685	0.530419767	586	489	0.084	0.153	0.487167771	9.32E-07	0.028398095	up	Tcta
Control-vs-T2DM	FB_Cluster_2	ENSMUSG00000029501	Ankle2	0.536207512	0.780239142	586	489	0.119	0.209	0.541040808	9.53E-07	0.029040392	up	Ankle2
Control-vs-T2DM	FB_Cluster_2	ENSMUSG00000047539	Fbxo28	0.281734441	0.418734879	586	489	0.067	0.131	0.571533665	9.70E-07	0.029552024	up	Fbxo28
Control-vs-T2DM	FB_Cluster_2	ENSMUSG00000022684	Bfar	0.630484299	0.810261469	586	489	0.135	0.221	0.36187633	1.03E-06	0.031263379	up	Bfar
Control-vs-T2DM	FB_Cluster_2	ENSMUSG00000033793	Atp6v1h	0.530357448	0.71946101	586	489	0.126	0.209	0.439879989	1.07E-06	0.032540018	up	Atp6v1h
Control-vs-T2DM	FB_Cluster_2	ENSMUSG00000001783	Rtcb	0.301616352	0.411982675	586	489	0.067	0.125	0.449740921	1.08E-06	0.032810172	up	Rtcb
Control-vs-T2DM	FB_Cluster_2	ENSMUSG00000039242	B3galnt2	0.347133269	0.479356416	586	489	0.073	0.139	0.465494497	1.18E-06	0.035927074	up	B3galnt2
Control-vs-T2DM	FB_Cluster_2	ENSMUSG00000068263	Efcc1	0.349127987	0.483866633	586	489	0.08	0.147	0.470738405	1.20E-06	0.036576164	up	Efcc1
Control-vs-T2DM	FB_Cluster_2	ENSMUSG00000028780	Sema3c	2.977584483	4.610743603	586	489	0.321	0.476	0.630839838	1.25E-06	0.038105379	up	Sema3c
Control-vs-T2DM	FB_Cluster_2	ENSMUSG00000032867	Fbxw8	0.686407588	0.919053678	586	489	0.148	0.241	0.421030426	1.36E-06	0.041554686	up	Fbxw8
Control-vs-T2DM	FB_Cluster_2	ENSMUSG00000020661	Dnmt3a	0.710222887	0.918363227	586	489	0.147	0.237	0.370746991	1.37E-06	0.041793374	up	Dnmt3a
Control-vs-T2DM	FB_Cluster_2	ENSMUSG00000040151	Hs2st1	0.68366802	0.977845098	586	489	0.142	0.239	0.516246524	1.48E-06	0.045071955	up	Hs2st1
Control-vs-T2DM	FB_Cluster_2	ENSMUSG00000027931	Npr1	0.286122135	0.528785945	586	489	0.065	0.147	0.885821389	1.52E-06	0.046463905	up	Npr1
Control-vs-T2DM	FB_Cluster_2	ENSMUSG00000033623	Pcgf3	0.370362605	0.642388056	586	489	0.084	0.174	0.794341711	1.54E-06	0.046921921	up	Pcgf3
Control-vs-T2DM	FB_Cluster_2	ENSMUSG00000002413	Braf	1.172924552	1.524561874	586	489	0.23	0.342	0.37825612	1.57E-06	0.047969877	up	Braf
Control-vs-T2DM	FB_Cluster_2	ENSMUSG00000024498	Tcerg1	0.528175797	0.684211137	586	489	0.119	0.198	0.373361115	1.70E-06	0.051924434	up	Tcerg1
Control-vs-T2DM	FB_Cluster_2	ENSMUSG00000000902	Smarcb1	0.394410818	0.550026588	586	489	0.094	0.166	0.479698769	2.07E-06	0.063071455	up	Smarcb1
Control-vs-T2DM	FB_Cluster_2	ENSMUSG00000024298	Zfp871	0.609073009	0.823497626	586	489	0.14	0.227	0.43508765	2.07E-06	0.063135648	up	Zfp871
Control-vs-T2DM	FB_Cluster_2	ENSMUSG00000020644	Id2	0.230179379	0.416349284	586	489	0.051	0.121	0.854755588	2.10E-06	0.064065776	up	Id2
Control-vs-T2DM	FB_Cluster_2	ENSMUSG00000036155	Mgat5	0.353190788	0.505245799	586	489	0.075	0.143	0.516414804	2.18E-06	0.066367	up	Mgat5
Control-vs-T2DM	FB_Cluster_2	ENSMUSG00000026305	Lrrfip1	0.279861245	0.48300136	586	489	0.063	0.139	0.787098788	2.23E-06	0.067960385	up	Lrrfip1
Control-vs-T2DM	FB_Cluster_2	ENSMUSG00000080316	Spaca6	0.356117434	0.466479921	586	489	0.085	0.145	0.389366098	2.23E-06	0.068076423	up	Spaca6
Control-vs-T2DM	FB_Cluster_2	ENSMUSG00000034993	Vat1	0.467847958	0.614194238	586	489	0.108	0.18	0.392581757	2.26E-06	0.068900769	up	Vat1
Control-vs-T2DM	FB_Cluster_2	ENSMUSG00000041258	Zfp236	0.430768876	0.714730866	586	489	0.099	0.192	0.730353041	2.58E-06	0.078569326	up	Zfp236
Control-vs-T2DM	FB_Cluster_2	ENSMUSG00000067925	Rtl8a	0.256835356	0.340589899	586	489	0.056	0.106	0.407053743	3.21E-06	0.097901665	up	Rtl8a
Control-vs-T2DM	FB_Cluster_2	ENSMUSG00000086859	Snhg20	0.258578392	0.404769696	586	489	0.056	0.121	0.646298116	3.34E-06	0.101684511	up	Snhg20
Control-vs-T2DM	FB_Cluster_2	ENSMUSG00000024235	Map3k8	0.331766243	0.446538777	586	489	0.072	0.129	0.428506624	4.45E-06	0.135727549	up	Map3k8
Control-vs-T2DM	FB_Cluster_2	ENSMUSG00000031835	Mbtps1	0.789370081	1.027526509	586	489	0.176	0.264	0.380359515	4.55E-06	0.13867186	up	Mbtps1
Control-vs-T2DM	FB_Cluster_2	ENSMUSG00000069727	Zfp975	0.21383695	0.434400148	586	489	0.048	0.121	1.022170988	5.00E-06	0.152342216	up	Zfp975
Control-vs-T2DM	FB_Cluster_2	ENSMUSG00000006344	Ggt5	0.664216285	0.956214953	586	489	0.131	0.227	0.525615553	5.18E-06	0.157987252	up	Ggt5
Control-vs-T2DM	FB_Cluster_2	ENSMUSG00000002957	Ap2a2	0.906298186	1.228577994	586	489	0.196	0.301	0.438889992	5.41E-06	0.164942645	up	Ap2a2
Control-vs-T2DM	FB_Cluster_2	ENSMUSG00000031583	Wrn	0.45821675	0.810364939	586	489	0.106	0.207	0.822404765	5.47E-06	0.166668457	up	Wrn
Control-vs-T2DM	FB_Cluster_2	ENSMUSG00000013736	Trnt1	0.234460046	0.337172309	586	489	0.055	0.106	0.52395658	6.12E-06	0.186616637	up	Trnt1
Control-vs-T2DM	FB_Cluster_2	ENSMUSG00000031534	Smim19	0.349104877	0.463935224	586	489	0.075	0.131	0.410160614	6.98E-06	0.212693916	up	Smim19
Control-vs-T2DM	FB_Cluster_2	ENSMUSG00000087201	Gm15261	2.34291701	3.153919589	586	489	0.333	0.47	0.428824193	8.18E-06	0.249412222	up	Gm15261
Control-vs-T2DM	FB_Cluster_2	ENSMUSG00000022757	Tfg	0.398429259	0.543982397	586	489	0.094	0.16	0.449139506	8.56E-06	0.260966131	up	Tfg
Control-vs-T2DM	FB_Cluster_2	ENSMUSG00000021823	Vcl	0.862236117	1.18212352	586	489	0.181	0.28	0.455180617	8.66E-06	0.263886268	up	Vcl
Control-vs-T2DM	FB_Cluster_2	ENSMUSG00000020003	Pex7	0.300249859	0.424896346	586	489	0.067	0.125	0.500806451	8.68E-06	0.264660279	up	Pex7
Control-vs-T2DM	FB_Cluster_2	ENSMUSG00000037461	Ints7	0.222821068	0.36949742	586	489	0.051	0.112	0.729421715	9.18E-06	0.279700966	up	Ints7
Control-vs-T2DM	FB_Cluster_2	ENSMUSG00000113136	Gm19951	0.377416276	0.556013116	586	489	0.078	0.149	0.558839518	1.00E-05	0.304851365	up	Gm19951
Control-vs-T2DM	FB_Cluster_2	ENSMUSG00000030986	Dhx32	0.290662046	0.419925921	586	489	0.068	0.129	0.530639404	1.22E-05	0.370591086	up	Dhx32
Control-vs-T2DM	FB_Cluster_2	ENSMUSG00000016933	Plcg1	0.249280509	0.33344953	586	489	0.061	0.112	0.419552293	1.23E-05	0.373556002	up	Plcg1
Control-vs-T2DM	FB_Cluster_2	ENSMUSG00000001173	Ocrl	0.41511679	0.559551001	586	489	0.094	0.162	0.430662659	1.26E-05	0.384651584	up	Ocrl
Control-vs-T2DM	FB_Cluster_2	ENSMUSG00000027035	Cers6	0.459401495	0.717451443	586	489	0.101	0.184	0.643012711	1.33E-05	0.405800431	up	Cers6
Control-vs-T2DM	FB_Cluster_2	ENSMUSG00000006576	Slc4a3	0.47998176	0.634852665	586	489	0.114	0.186	0.403368921	1.39E-05	0.4229467	up	Slc4a3
Control-vs-T2DM	FB_Cluster_2	ENSMUSG00000030682	Cdipt	0.330955086	0.426459926	586	489	0.07	0.121	0.36567714	1.48E-05	0.450196143	up	Cdipt
Control-vs-T2DM	FB_Cluster_2	ENSMUSG00000079083	Jrkl	0.301039245	0.404278194	586	489	0.068	0.121	0.425274467	1.54E-05	0.468601356	up	Jrkl
Control-vs-T2DM	FB_Cluster_2	ENSMUSG00000022500	Litaf	0.484917307	0.670162201	586	489	0.104	0.178	0.46668935	1.61E-05	0.492188832	up	Litaf
Control-vs-T2DM	FB_Cluster_2	ENSMUSG00000030029	Lrig1	0.406135475	0.588451245	586	489	0.099	0.172	0.534851804	1.73E-05	0.526718997	up	Lrig1
Control-vs-T2DM	FB_Cluster_2	ENSMUSG00000059401	Mamld1	0.557519912	0.745019032	586	489	0.123	0.202	0.418188832	1.88E-05	0.573790099	up	Mamld1
Control-vs-T2DM	FB_Cluster_2	ENSMUSG00000013236	Ptprs	0.578157894	0.915389691	586	489	0.131	0.227	0.662830584	1.91E-05	0.58262853	up	Ptprs
Control-vs-T2DM	FB_Cluster_2	ENSMUSG00000026356	Dars	0.38478316	0.694129746	586	489	0.09	0.18	0.850992633	2.02E-05	0.614780116	up	Dars
Control-vs-T2DM	FB_Cluster_2	ENSMUSG00000041958	Pigs	0.311657924	0.453992683	586	489	0.072	0.133	0.542560559	2.15E-05	0.655680828	up	Pigs
Control-vs-T2DM	FB_Cluster_2	ENSMUSG00000035919	Bbs9	0.536380579	0.921866123	586	489	0.116	0.215	0.781187795	2.30E-05	0.70130393	up	Bbs9
Control-vs-T2DM	FB_Cluster_2	ENSMUSG00000027011	Ube2e3	0.382093945	0.568105858	586	489	0.085	0.157	0.572108782	2.41E-05	0.734953293	up	Ube2e3
Control-vs-T2DM	FB_Cluster_2	ENSMUSG00000033295	Ptprf	0.303452944	0.396073992	586	489	0.067	0.119	0.384186007	2.44E-05	0.744277299	up	Ptprf
Control-vs-T2DM	FB_Cluster_2	ENSMUSG00000053965	Pde5a	0.184184477	0.361639493	586	489	0.044	0.108	0.973016565	2.87E-05	0.876066147	up	Pde5a
Control-vs-T2DM	FB_Cluster_2	ENSMUSG00000043496	Tril	0.719326883	0.960489786	586	489	0.16	0.247	0.4170724	2.92E-05	0.890822865	up	Tril
Control-vs-T2DM	FB_Cluster_2	ENSMUSG00000097536	2610037D02Rik	0.605949083	0.893233198	586	489	0.138	0.227	0.559763736	2.95E-05	0.897612755	up	2610037D02Rik
Control-vs-T2DM	FB_Cluster_2	ENSMUSG00000031652	N4bp1	0.471420907	0.664684334	586	489	0.106	0.178	0.495564646	3.03E-05	0.923901807	up	N4bp1
Control-vs-T2DM	FB_Cluster_2	ENSMUSG00000029998	Pcyox1	0.36907344	0.558784399	586	489	0.087	0.157	0.598251142	3.08E-05	0.938394488	up	Pcyox1
Control-vs-T2DM	FB_Cluster_2	ENSMUSG00000115693	1700085D07Rik	0.267176694	0.450504533	586	489	0.06	0.129	0.753527782	3.19E-05	0.973404644	up	1700085D07Rik
Control-vs-T2DM	FB_Cluster_2	ENSMUSG00000027671	Actl6a	0.314391662	0.464815759	586	489	0.072	0.135	0.563947561	3.29E-05	1	up	Actl6a
Control-vs-T2DM	FB_Cluster_2	ENSMUSG00000028433	Ubap2	0.428495857	0.592073114	586	489	0.096	0.164	0.466401086	3.35E-05	1	up	Ubap2
Control-vs-T2DM	FB_Cluster_2	ENSMUSG00000028920	Fbxo42	0.352796466	0.50729693	586	489	0.089	0.155	0.523869808	3.48E-05	1	up	Fbxo42
Control-vs-T2DM	FB_Cluster_2	ENSMUSG00000057143	Trim12c	0.213822369	0.40942226	586	489	0.049	0.115	0.936854527	3.48E-05	1	up	Trim12c
Control-vs-T2DM	FB_Cluster_2	ENSMUSG00000026269	Rnpepl1	0.276936152	0.400734047	586	489	0.063	0.119	0.532930805	3.52E-05	1	up	Rnpepl1
Control-vs-T2DM	FB_Cluster_2	ENSMUSG00000039208	Metrnl	0.476767118	0.72463544	586	489	0.104	0.18	0.603867139	3.59E-05	1	up	Metrnl
Control-vs-T2DM	FB_Cluster_2	ENSMUSG00000039768	Dnajc11	0.256074519	0.337911461	586	489	0.056	0.106	0.399945181	3.91E-05	1	up	Dnajc11
Control-vs-T2DM	FB_Cluster_2	ENSMUSG00000035024	Ncapd3	0.271370472	0.447303759	586	489	0.061	0.123	0.720782096	4.03E-05	1	up	Ncapd3
Control-vs-T2DM	FB_Cluster_2	ENSMUSG00000029267	Mtf2	0.408040122	0.537432058	586	489	0.089	0.149	0.397286257	4.08E-05	1	up	Mtf2
Control-vs-T2DM	FB_Cluster_2	ENSMUSG00000026077	Npas2	1.568283417	2.018677663	586	489	0.275	0.384	0.364203736	4.39E-05	1	up	Npas2
Control-vs-T2DM	FB_Cluster_2	ENSMUSG00000027583	Zbtb46	0.253001951	0.356186102	586	489	0.053	0.102	0.493317579	4.39E-05	1	up	Zbtb46
Control-vs-T2DM	FB_Cluster_2	ENSMUSG00000002504	Slc9a3r2	0.216259556	0.362154848	586	489	0.044	0.102	0.743574157	4.41E-05	1	up	Slc9a3r2
Control-vs-T2DM	FB_Cluster_2	ENSMUSG00000035765	Dym	0.56434767	0.748945935	586	489	0.131	0.209	0.408214358	4.52E-05	1	up	Dym
Control-vs-T2DM	FB_Cluster_2	ENSMUSG00000031529	Tnks	0.914627256	1.195284362	586	489	0.193	0.286	0.386061031	4.56E-05	1	up	Tnks
Control-vs-T2DM	FB_Cluster_2	ENSMUSG00000025871	4833439L19Rik	0.217629856	0.383628459	586	489	0.053	0.115	0.817546515	4.63E-05	1	up	4833439L19Rik
Control-vs-T2DM	FB_Cluster_2	ENSMUSG00000035356	Nfkbiz	0.270119804	0.52285862	586	489	0.061	0.135	0.952563384	5.51E-05	1	up	Nfkbiz
Control-vs-T2DM	FB_Cluster_2	ENSMUSG00000060657	Marf1	0.52496038	0.839138237	586	489	0.128	0.221	0.676597074	5.54E-05	1	up	Marf1
Control-vs-T2DM	FB_Cluster_2	ENSMUSG00000087518	Gm13561	0.217826068	0.546771975	586	489	0.046	0.119	1.327364349	5.57E-05	1	up	Gm13561
Control-vs-T2DM	FB_Cluster_2	ENSMUSG00000038594	Cep85l	0.963961368	1.30311626	586	489	0.208	0.309	0.434879619	6.07E-05	1	up	Cep85l
Control-vs-T2DM	FB_Cluster_2	ENSMUSG00000026020	Nop58	0.326406615	0.428432856	586	489	0.08	0.131	0.392293601	6.31E-05	1	up	Nop58
Control-vs-T2DM	FB_Cluster_2	ENSMUSG00000063019	Manbal	0.256725906	0.411210124	586	489	0.06	0.119	0.679435849	6.33E-05	1	up	Manbal
Control-vs-T2DM	FB_Cluster_2	ENSMUSG00000025287	Acot9	0.372466004	0.534999122	586	489	0.085	0.149	0.522310127	6.62E-05	1	up	Acot9
Control-vs-T2DM	FB_Cluster_2	ENSMUSG00000016831	Tox4	0.289575733	0.403726698	586	489	0.065	0.117	0.479297464	7.49E-05	1	up	Tox4
Control-vs-T2DM	FB_Cluster_2	ENSMUSG00000115463	Gm49356	0.310837566	0.412052971	586	489	0.07	0.121	0.406554968	7.54E-05	1	up	Gm49356
Control-vs-T2DM	FB_Cluster_2	ENSMUSG00000039050	Osbpl2	0.29756836	0.525646331	586	489	0.065	0.135	0.820660996	7.67E-05	1	up	Osbpl2
Control-vs-T2DM	FB_Cluster_2	ENSMUSG00000020705	Ddx42	0.807343212	1.060764294	586	489	0.177	0.264	0.393807415	7.70E-05	1	up	Ddx42
Control-vs-T2DM	FB_Cluster_2	ENSMUSG00000006127	Inpp5k	0.25340105	0.352441949	586	489	0.063	0.112	0.475803209	8.00E-05	1	up	Inpp5k
Control-vs-T2DM	FB_Cluster_2	ENSMUSG00000038143	Stox2	0.912215258	1.202444957	586	489	0.189	0.278	0.39848648	8.48E-05	1	up	Stox2
Control-vs-T2DM	FB_Cluster_2	ENSMUSG00000020886	Dlg4	0.363339147	0.523128265	586	489	0.085	0.147	0.525726655	8.99E-05	1	up	Dlg4
Control-vs-T2DM	FB_Cluster_2	ENSMUSG00000038406	Scaf1	0.404641101	0.558363245	586	489	0.097	0.162	0.464462972	9.19E-05	1	up	Scaf1
Control-vs-T2DM	FB_Cluster_2	ENSMUSG00000031558	Slit2	1.884998881	2.694803498	586	489	0.294	0.417	0.515593412	9.85E-05	1	up	Slit2
Control-vs-T2DM	FB_Cluster_2	ENSMUSG00000028437	Ubap1	0.35527871	0.467622711	586	489	0.08	0.133	0.396296224	9.89E-05	1	up	Ubap1
Control-vs-T2DM	FB_Cluster_2	ENSMUSG00000032011	Thy1	0.468414264	0.651886723	586	489	0.089	0.153	0.476749612	0.000101042	1	up	Thy1
Control-vs-T2DM	FB_Cluster_2	ENSMUSG00000031697	Orc6	0.311010286	0.414014842	586	489	0.063	0.112	0.412604819	0.000104554	1	up	Orc6
Control-vs-T2DM	FB_Cluster_2	ENSMUSG00000037486	Asxl2	0.749155801	0.998143714	586	489	0.162	0.245	0.413933734	0.000112303	1	up	Asxl2
Control-vs-T2DM	FB_Cluster_2	ENSMUSG00000052632	Asap2	0.989622499	1.311388965	586	489	0.22	0.317	0.406109689	0.000116687	1	up	Asap2
Control-vs-T2DM	FB_Cluster_2	ENSMUSG00000042472	Zfp410	0.221076865	0.33289445	586	489	0.053	0.104	0.590297641	0.000120089	1	up	Zfp410
Control-vs-T2DM	FB_Cluster_2	ENSMUSG00000024896	Minpp1	0.344717007	0.488752909	586	489	0.082	0.141	0.503569505	0.000134799	1	up	Minpp1
Control-vs-T2DM	FB_Cluster_2	ENSMUSG00000031631	Cfap97	0.315202596	0.440372079	586	489	0.068	0.121	0.482313521	0.000135595	1	up	Cfap97
Control-vs-T2DM	FB_Cluster_2	ENSMUSG00000014498	Ankrd52	0.233295321	0.37605576	586	489	0.051	0.106	0.688554541	0.000138536	1	up	Ankrd52
Control-vs-T2DM	FB_Cluster_2	ENSMUSG00000016382	Pls3	0.79794641	1.115469204	586	489	0.167	0.256	0.48323546	0.000141403	1	up	Pls3
Control-vs-T2DM	FB_Cluster_2	ENSMUSG00000031935	Med17	0.235028342	0.369107467	586	489	0.055	0.108	0.650983283	0.000159025	1	up	Med17
Control-vs-T2DM	FB_Cluster_2	ENSMUSG00000028086	Fbxw7	0.598332453	0.790916037	586	489	0.126	0.196	0.40251853	0.000161771	1	up	Fbxw7
Control-vs-T2DM	FB_Cluster_2	ENSMUSG00000024691	Fam111a	0.34795601	0.470755647	586	489	0.084	0.139	0.435965347	0.000166489	1	up	Fam111a
Control-vs-T2DM	FB_Cluster_2	ENSMUSG00000025006	Sorbs1	0.560061715	0.738058725	586	489	0.121	0.186	0.398087687	0.000178911	1	up	Sorbs1
Control-vs-T2DM	FB_Cluster_2	ENSMUSG00000109754	Gm39214	0.268476703	0.432478766	586	489	0.058	0.112	0.687628682	0.000180558	1	up	Gm39214
Control-vs-T2DM	FB_Cluster_2	ENSMUSG00000040170	Fmo2	0.573307211	0.901098119	586	489	0.114	0.196	0.652284256	0.00018882	1	up	Fmo2
Control-vs-T2DM	FB_Cluster_2	ENSMUSG00000071037	Camkmt	0.881776885	1.142370456	586	489	0.164	0.243	0.373507692	0.000190096	1	up	Camkmt
Control-vs-T2DM	FB_Cluster_2	ENSMUSG00000061838	Suclg2	0.538039733	0.694554182	586	489	0.118	0.182	0.368314112	0.000190114	1	up	Suclg2
Control-vs-T2DM	FB_Cluster_2	ENSMUSG00000021692	Dimt1	0.245786729	0.330964275	586	489	0.061	0.106	0.429117465	0.000198615	1	up	Dimt1
Control-vs-T2DM	FB_Cluster_2	ENSMUSG00000113380	Gm48682	0.215907572	0.503194005	586	489	0.049	0.115	1.220319526	0.000234135	1	up	Gm48682
Control-vs-T2DM	FB_Cluster_2	ENSMUSG00000021275	Tecpr2	0.236763291	0.344404925	586	489	0.056	0.104	0.540469982	0.000241587	1	up	Tecpr2
Control-vs-T2DM	FB_Cluster_2	ENSMUSG00000068329	Htra2	0.35541299	0.504344269	586	489	0.082	0.141	0.504792613	0.000245744	1	up	Htra2
Control-vs-T2DM	FB_Cluster_2	ENSMUSG00000039840	Epg5	0.21878545	0.33222593	586	489	0.056	0.106	0.602422806	0.000256625	1	up	Epg5
Control-vs-T2DM	FB_Cluster_2	ENSMUSG00000026851	BC005624	0.323481516	0.481249429	586	489	0.075	0.133	0.572955377	0.00027827	1	up	BC005624
Control-vs-T2DM	FB_Cluster_2	ENSMUSG00000055723	Rras2	0.403236804	0.539161606	586	489	0.09	0.147	0.419000265	0.000327649	1	up	Rras2
Control-vs-T2DM	FB_Cluster_2	ENSMUSG00000027423	Snx5	0.310262526	0.400953154	586	489	0.08	0.127	0.369839084	0.000329199	1	up	Snx5
Control-vs-T2DM	FB_Cluster_2	ENSMUSG00000029994	Anxa4	0.326558045	0.493422517	586	489	0.075	0.135	0.595334737	0.00034708	1	up	Anxa4
Control-vs-T2DM	FB_Cluster_2	ENSMUSG00000063364	3300002I08Rik	0.217387772	0.443334585	586	489	0.053	0.117	1.027787004	0.000371376	1	up	3300002I08Rik
Control-vs-T2DM	FB_Cluster_2	ENSMUSG00000027188	Pamr1	0.723652765	1.261142635	586	489	0.142	0.235	0.801276984	0.000375576	1	up	Pamr1
Control-vs-T2DM	FB_Cluster_2	ENSMUSG00000024287	Thoc1	0.555768464	0.792599068	586	489	0.126	0.2	0.512029743	0.000393225	1	up	Thoc1
Control-vs-T2DM	FB_Cluster_2	ENSMUSG00000044629	Cnrip1	0.596174537	0.783543826	586	489	0.128	0.194	0.394221353	0.000433855	1	up	Cnrip1
Control-vs-T2DM	FB_Cluster_2	ENSMUSG00000039294	Cybc1	0.233093426	0.35886197	586	489	0.053	0.102	0.62230389	0.000437103	1	up	Cybc1
Control-vs-T2DM	FB_Cluster_2	ENSMUSG00000034940	Synrg	0.556999154	0.726894238	586	489	0.131	0.192	0.384009805	0.00044536	1	up	Synrg
Control-vs-T2DM	FB_Cluster_2	ENSMUSG00000037098	Rab11fip3	0.32814091	0.545025218	586	489	0.078	0.145	0.731832603	0.000451325	1	up	Rab11fip3
Control-vs-T2DM	FB_Cluster_2	ENSMUSG00000034656	Cacna1a	0.479697443	0.76949038	586	489	0.106	0.184	0.681665298	0.000456027	1	up	Cacna1a
Control-vs-T2DM	FB_Cluster_2	ENSMUSG00000029321	Slc10a6	0.323907496	0.445331191	586	489	0.073	0.125	0.459175394	0.000474399	1	up	Slc10a6
Control-vs-T2DM	FB_Cluster_2	ENSMUSG00000041235	Chd7	0.252746716	0.368483407	586	489	0.056	0.102	0.543728083	0.000480642	1	up	Chd7
Control-vs-T2DM	FB_Cluster_2	ENSMUSG00000025178	Pi4k2a	0.241711331	0.324567513	586	489	0.06	0.102	0.425081182	0.000490439	1	up	Pi4k2a
Control-vs-T2DM	FB_Cluster_2	ENSMUSG00000029577	Ube3b	0.283559946	0.364970315	586	489	0.06	0.102	0.364011914	0.000499974	1	up	Ube3b
Control-vs-T2DM	FB_Cluster_2	ENSMUSG00000061455	Stx17	0.28973125	0.400379259	586	489	0.063	0.11	0.466514372	0.00051859	1	up	Stx17
Control-vs-T2DM	FB_Cluster_2	ENSMUSG00000001473	Tubb6	0.30755857	0.415467536	586	489	0.073	0.121	0.433752775	0.000519518	1	up	Tubb6
Control-vs-T2DM	FB_Cluster_2	ENSMUSG00000008976	Gabpa	0.274854862	0.363823337	586	489	0.067	0.11	0.404439774	0.000539271	1	up	Gabpa
Control-vs-T2DM	FB_Cluster_2	ENSMUSG00000037669	Ldah	0.396961002	0.5992547	586	489	0.092	0.16	0.594049377	0.000556687	1	up	Ldah
Control-vs-T2DM	FB_Cluster_2	ENSMUSG00000045665	Mfsd5	0.267020212	0.363762971	586	489	0.061	0.108	0.445906098	0.000619582	1	up	Mfsd5
Control-vs-T2DM	FB_Cluster_2	ENSMUSG00000036181	H1f2	0.348717132	0.527924899	586	489	0.08	0.139	0.59813506	0.000661688	1	up	H1f2
Control-vs-T2DM	FB_Cluster_2	ENSMUSG00000057409	Zfp53	0.311587319	0.512624118	586	489	0.078	0.143	0.718083303	0.000697015	1	up	Zfp53
Control-vs-T2DM	FB_Cluster_2	ENSMUSG00000040254	Sema3d	0.263392382	0.39307903	586	489	0.055	0.102	0.57742513	0.000705669	1	up	Sema3d
Control-vs-T2DM	FB_Cluster_2	ENSMUSG00000020101	Vsir	0.385479508	0.507321964	586	489	0.084	0.133	0.396157589	0.000719728	1	up	Vsir
Control-vs-T2DM	FB_Cluster_2	ENSMUSG00000002108	Nr1h3	0.270867295	0.34845504	586	489	0.065	0.104	0.363267758	0.000726232	1	up	Nr1h3
Control-vs-T2DM	FB_Cluster_2	ENSMUSG00000042350	Arel1	0.303566008	0.394503709	586	489	0.07	0.115	0.377919093	0.000741355	1	up	Arel1
Control-vs-T2DM	FB_Cluster_2	ENSMUSG00000034681	Rnps1	0.360459157	0.468879247	586	489	0.084	0.135	0.379288099	0.000748848	1	up	Rnps1
Control-vs-T2DM	FB_Cluster_2	ENSMUSG00000048720	Tbc1d12	0.776489284	0.998736901	586	489	0.162	0.233	0.363097322	0.000763767	1	up	Tbc1d12
Control-vs-T2DM	FB_Cluster_2	ENSMUSG00000105891	A230001M10Rik	1.088603368	1.545399901	586	489	0.172	0.256	0.505462637	0.000780851	1	up	A230001M10Rik
Control-vs-T2DM	FB_Cluster_2	ENSMUSG00000096210	H1f0	0.311675944	0.448038266	586	489	0.073	0.125	0.523434304	0.000789827	1	up	H1f0
Control-vs-T2DM	FB_Cluster_2	ENSMUSG00000026245	Farsb	0.266029315	0.379367022	586	489	0.065	0.112	0.511847077	0.000791425	1	up	Farsb
Control-vs-T2DM	FB_Cluster_2	ENSMUSG00000057147	Dph6	0.314181872	0.451110773	586	489	0.068	0.119	0.521742458	0.000827365	1	up	Dph6
Control-vs-T2DM	FB_Cluster_2	ENSMUSG00000026309	Ilkap	0.511687391	0.738799062	586	489	0.123	0.196	0.529832693	0.000864708	1	up	Ilkap
Control-vs-T2DM	FB_Cluster_2	ENSMUSG00000039787	Cercam	0.245977967	0.391431273	586	489	0.063	0.117	0.670012056	0.00089756	1	up	Cercam
Control-vs-T2DM	FB_Cluster_2	ENSMUSG00000005803	Sqor	0.379259009	0.505088872	586	489	0.089	0.141	0.413259061	0.000937561	1	up	Sqor
Control-vs-T2DM	FB_Cluster_2	ENSMUSG00000031601	Cnot7	0.272301941	0.375164546	586	489	0.063	0.106	0.462171008	0.000942899	1	up	Cnot7
Control-vs-T2DM	FB_Cluster_2	ENSMUSG00000015957	Wnt11	0.369592889	0.511410403	586	489	0.082	0.135	0.468436285	0.000967995	1	up	Wnt11
Control-vs-T2DM	FB_Cluster_2	ENSMUSG00000044674	Fzd1	0.249242676	0.420755706	586	489	0.063	0.121	0.755195851	0.001100059	1	up	Fzd1
Control-vs-T2DM	FB_Cluster_2	ENSMUSG00000046111	Cep295	0.31432431	0.416536993	586	489	0.072	0.117	0.406078175	0.00110683	1	up	Cep295
Control-vs-T2DM	FB_Cluster_2	ENSMUSG00000030104	Edem1	0.408030625	0.584558419	586	489	0.094	0.153	0.518563019	0.001216984	1	up	Edem1
Control-vs-T2DM	FB_Cluster_2	ENSMUSG00000030790	Adm	0.283467814	0.543645641	586	489	0.056	0.117	0.939238136	0.001326516	1	up	Adm
Control-vs-T2DM	FB_Cluster_2	ENSMUSG00000037624	Kcnk2	0.904031762	1.195721145	586	489	0.164	0.237	0.403396685	0.00147885	1	up	Kcnk2
Control-vs-T2DM	FB_Cluster_2	ENSMUSG00000024663	Rab3il1	0.317349089	0.473280987	586	489	0.077	0.131	0.576476526	0.001498383	1	up	Rab3il1
Control-vs-T2DM	FB_Cluster_2	ENSMUSG00000056515	Rab31	0.349141825	0.523583919	586	489	0.082	0.139	0.584469957	0.001502926	1	up	Rab31
Control-vs-T2DM	FB_Cluster_2	ENSMUSG00000038301	Snx10	0.260583668	0.37346419	586	489	0.061	0.11	0.519055963	0.001570262	1	up	Snx10
Control-vs-T2DM	FB_Cluster_2	ENSMUSG00000026037	Orc2	0.268633725	0.381544684	586	489	0.063	0.108	0.506052712	0.001618585	1	up	Orc2
Control-vs-T2DM	FB_Cluster_2	ENSMUSG00000019842	Traf3ip2	0.373462072	0.512265477	586	489	0.087	0.139	0.455825285	0.001619855	1	up	Traf3ip2
Control-vs-T2DM	FB_Cluster_2	ENSMUSG00000020611	Gna13	0.366431056	0.476855614	586	489	0.077	0.127	0.379919572	0.001709976	1	up	Gna13
Control-vs-T2DM	FB_Cluster_2	ENSMUSG00000090523	Gypc	0.213763168	0.368396213	586	489	0.053	0.104	0.784961757	0.001842455	1	up	Gypc
Control-vs-T2DM	FB_Cluster_2	ENSMUSG00000034040	Galnt17	0.785074216	1.106346372	586	489	0.169	0.249	0.494848825	0.001974944	1	up	Galnt17
Control-vs-T2DM	FB_Cluster_2	ENSMUSG00000056999	Ide	0.315685933	0.450440723	586	489	0.077	0.127	0.512710606	0.00202818	1	up	Ide
Control-vs-T2DM	FB_Cluster_2	ENSMUSG00000022131	Gpr180	0.376871195	0.58950437	586	489	0.089	0.153	0.645292929	0.002063618	1	up	Gpr180
Control-vs-T2DM	FB_Cluster_2	ENSMUSG00000031402	Mpp1	0.246984603	0.354651408	586	489	0.061	0.104	0.521803296	0.002166866	1	up	Mpp1
Control-vs-T2DM	FB_Cluster_2	ENSMUSG00000000959	Oxa1l	0.220366924	0.34071016	586	489	0.056	0.102	0.628406114	0.002176406	1	up	Oxa1l
Control-vs-T2DM	FB_Cluster_2	ENSMUSG00000022216	Psme1	0.490869552	0.635743107	586	489	0.114	0.168	0.37303727	0.002285948	1	up	Psme1
Control-vs-T2DM	FB_Cluster_2	ENSMUSG00000025268	Maged2	0.407958162	0.535939991	586	489	0.092	0.141	0.393565836	0.002370927	1	up	Maged2
Control-vs-T2DM	FB_Cluster_2	ENSMUSG00000028961	Pgd	0.280623813	0.373974951	586	489	0.063	0.104	0.414175913	0.002515099	1	up	Pgd
Control-vs-T2DM	FB_Cluster_2	ENSMUSG00000030748	Il4ra	0.236650963	0.394276966	586	489	0.058	0.108	0.736204997	0.002613726	1	up	Il4ra
Control-vs-T2DM	FB_Cluster_2	ENSMUSG00000023027	Atf1	0.308174272	0.421891526	586	489	0.073	0.121	0.452999536	0.002637691	1	up	Atf1
Control-vs-T2DM	FB_Cluster_2	ENSMUSG00000020818	Mfsd11	0.277079628	0.395381665	586	489	0.067	0.11	0.512789585	0.002726988	1	up	Mfsd11
Control-vs-T2DM	FB_Cluster_2	ENSMUSG00000029554	Mad1l1	0.296993388	0.3843997	586	489	0.072	0.11	0.372065972	0.00289247	1	up	Mad1l1
Control-vs-T2DM	FB_Cluster_2	ENSMUSG00000022404	Slc25a17	0.307113722	0.458196339	586	489	0.073	0.125	0.577038104	0.002908731	1	up	Slc25a17
Control-vs-T2DM	FB_Cluster_2	ENSMUSG00000033396	Spg11	0.323750396	0.4775258	586	489	0.078	0.129	0.56055326	0.002995571	1	up	Spg11
Control-vs-T2DM	FB_Cluster_2	ENSMUSG00000074793	Hspa12b	0.262150264	0.399841234	586	489	0.056	0.102	0.608843806	0.003102003	1	up	Hspa12b
Control-vs-T2DM	FB_Cluster_2	ENSMUSG00000025034	Trim8	0.332106352	0.455249666	586	489	0.077	0.121	0.454895165	0.003168037	1	up	Trim8
Control-vs-T2DM	FB_Cluster_2	ENSMUSG00000000567	Sox9	0.596205216	0.813651943	586	489	0.131	0.196	0.448538128	0.003224435	1	up	Sox9
Control-vs-T2DM	FB_Cluster_2	ENSMUSG00000038291	Snx25	0.27622781	0.393007662	586	489	0.061	0.104	0.508543721	0.003243605	1	up	Snx25
Control-vs-T2DM	FB_Cluster_2	ENSMUSG00000019878	Hsf2	0.261755883	0.358189019	586	489	0.061	0.102	0.452350811	0.003259971	1	up	Hsf2
Control-vs-T2DM	FB_Cluster_2	ENSMUSG00000035762	Tmem161b	0.436503019	0.582491958	586	489	0.108	0.162	0.41616368	0.003535819	1	up	Tmem161b
Control-vs-T2DM	FB_Cluster_2	ENSMUSG00000039515	Ptpa	0.398679564	0.525582925	586	489	0.097	0.145	0.398601395	0.003849978	1	up	Ptpa
Control-vs-T2DM	FB_Cluster_2	ENSMUSG00000024597	Slc12a2	0.228847269	0.36025505	586	489	0.058	0.104	0.654403708	0.003990306	1	up	Slc12a2
Control-vs-T2DM	FB_Cluster_2	ENSMUSG00000027822	Slc33a1	0.404655438	0.520496582	586	489	0.096	0.143	0.363115379	0.004047398	1	up	Slc33a1
Control-vs-T2DM	FB_Cluster_2	ENSMUSG00000027374	Mrps5	0.289441247	0.382752682	586	489	0.067	0.104	0.403020477	0.004074938	1	up	Mrps5
Control-vs-T2DM	FB_Cluster_2	ENSMUSG00000024855	Pacs1	0.582919734	0.767926616	586	489	0.131	0.188	0.397611591	0.004103453	1	up	Pacs1
Control-vs-T2DM	FB_Cluster_2	ENSMUSG00000038023	Atp6v0a2	0.458286931	0.618138251	586	489	0.111	0.166	0.431597007	0.004153368	1	up	Atp6v0a2
Control-vs-T2DM	FB_Cluster_2	ENSMUSG00000022091	Sorbs3	0.527040866	0.68252188	586	489	0.126	0.182	0.37289812	0.004166409	1	up	Sorbs3
Control-vs-T2DM	FB_Cluster_2	ENSMUSG00000034848	Ttc21b	0.265852527	0.45229884	586	489	0.063	0.117	0.766426483	0.005036834	1	up	Ttc21b
Control-vs-T2DM	FB_Cluster_2	ENSMUSG00000021661	Ankra2	0.303771824	0.397171533	586	489	0.07	0.108	0.386662509	0.005625406	1	up	Ankra2
Control-vs-T2DM	FB_Cluster_2	ENSMUSG00000079018	Ly6c1	3.13581084	4.029291516	586	489	0.401	0.497	0.36167745	0.005951654	1	up	Ly6c1
Control-vs-T2DM	FB_Cluster_2	ENSMUSG00000070348	Ccnd1	0.362525118	0.468942187	586	489	0.078	0.121	0.371238828	0.005997797	1	up	Ccnd1
Control-vs-T2DM	FB_Cluster_2	ENSMUSG00000039163	Cmc1	0.240145655	0.356275053	586	489	0.058	0.102	0.568886011	0.006471523	1	up	Cmc1
Control-vs-T2DM	FB_Cluster_2	ENSMUSG00000037419	Endod1	0.251519956	0.365072589	586	489	0.061	0.102	0.537332125	0.006560942	1	up	Endod1
Control-vs-T2DM	FB_Cluster_2	ENSMUSG00000051853	Arf3	0.236210741	0.385910146	586	489	0.058	0.104	0.707953563	0.006712345	1	up	Arf3
Control-vs-T2DM	FB_Cluster_2	ENSMUSG00000056493	Foxk1	0.267046153	0.407981473	586	489	0.067	0.112	0.611227968	0.006988305	1	up	Foxk1
Control-vs-T2DM	FB_Cluster_2	ENSMUSG00000086121	Gm16068	0.279470517	0.385599382	586	489	0.06	0.102	0.464264609	0.007614173	1	up	Gm16068
Control-vs-T2DM	FB_Cluster_2	ENSMUSG00000053460	Ggcx	0.330576007	0.42876764	586	489	0.08	0.119	0.375114091	0.008026815	1	up	Ggcx
Control-vs-T2DM	FB_Cluster_2	ENSMUSG00000058152	Chsy3	0.477503994	0.712405023	586	489	0.094	0.151	0.577085283	0.008894429	1	up	Chsy3
Control-vs-T2DM	FB_Cluster_2	ENSMUSG00000007564	Ppp2r1a	0.31181476	0.474189202	586	489	0.075	0.127	0.604615199	0.009262228	1	up	Ppp2r1a
Control-vs-T2DM	FB_Cluster_2	ENSMUSG00000019779	Frk	0.23099065	0.433410108	586	489	0.06	0.11	0.907606745	0.010899072	1	up	Frk
Control-vs-T2DM	FB_Cluster_2	ENSMUSG00000044770	Scml4	0.286918005	0.402592967	586	489	0.063	0.102	0.488539034	0.011071017	1	up	Scml4
Control-vs-T2DM	FB_Cluster_2	ENSMUSG00000025534	Gusb	0.449991965	0.612561957	586	489	0.108	0.16	0.444871462	0.011636807	1	up	Gusb
Control-vs-T2DM	FB_Cluster_2	ENSMUSG00000034463	Scara3	0.382270327	0.519473708	586	489	0.087	0.133	0.442357858	0.013799507	1	up	Scara3
Control-vs-T2DM	FB_Cluster_2	ENSMUSG00000027806	Tsc22d2	1.173734283	1.522095909	586	489	0.242	0.321	0.374925299	0.014500883	1	up	Tsc22d2
Control-vs-T2DM	FB_Cluster_2	ENSMUSG00000015149	Sirt2	0.432137332	0.568320019	586	489	0.106	0.151	0.395133684	0.015281798	1	up	Sirt2
Control-vs-T2DM	FB_Cluster_2	ENSMUSG00000031386	Hcfc1	0.259555954	0.40314721	586	489	0.073	0.121	0.635063244	0.016249734	1	up	Hcfc1
Control-vs-T2DM	FB_Cluster_2	ENSMUSG00000038417	Fig4	0.341607556	0.445658185	586	489	0.085	0.127	0.383499139	0.016518809	1	up	Fig4
Control-vs-T2DM	FB_Cluster_2	ENSMUSG00000006219	Fblim1	0.383476736	0.502699544	586	489	0.087	0.127	0.39046812	0.017040731	1	up	Fblim1
Control-vs-T2DM	FB_Cluster_2	ENSMUSG00000038206	Fbxo8	0.267699686	0.352466465	586	489	0.067	0.102	0.396740984	0.018633462	1	up	Fbxo8
Control-vs-T2DM	FB_Cluster_2	ENSMUSG00000026235	Epha4	0.243609629	0.404035704	586	489	0.061	0.104	0.729676563	0.020611976	1	up	Epha4
Control-vs-T2DM	FB_Cluster_2	ENSMUSG00000018800	Abca5	0.390475169	0.549820084	586	489	0.087	0.131	0.493621746	0.022035985	1	up	Abca5
Control-vs-T2DM	FB_Cluster_2	ENSMUSG00000025355	Mmp19	0.27012718	0.366644964	586	489	0.068	0.104	0.440604369	0.02366663	1	up	Mmp19
Control-vs-T2DM	FB_Cluster_2	ENSMUSG00000027551	Zfp64	0.259120227	0.385272363	586	489	0.063	0.102	0.572074817	0.025539797	1	up	Zfp64
Control-vs-T2DM	FB_Cluster_2	ENSMUSG00000117254	Gm34567	0.3729264	0.525898371	586	489	0.09	0.139	0.495780594	0.026033063	1	up	Gm34567
Control-vs-T2DM	FB_Cluster_2	ENSMUSG00000051950	B3glct	0.326615097	0.4585661	586	489	0.072	0.108	0.489411158	0.031090714	1	up	B3glct
Control-vs-T2DM	FB_Cluster_2	ENSMUSG00000021957	Tkt	0.531125727	0.689070137	586	489	0.121	0.166	0.375535171	0.03407477	1	up	Tkt
Control-vs-T2DM	FB_Cluster_2	ENSMUSG00000033849	B3galt2	0.262897219	0.384550703	586	489	0.068	0.106	0.548501403	0.036360408	1	up	B3galt2
Control-vs-T2DM	FB_Cluster_3	ENSMUSG00000029309	Sparcl1	8.057970506	14.72937732	295	267	0.678	0.629	0.870199903	4.44E-14	1.35E-09	up	Sparcl1
Control-vs-T2DM	FB_Cluster_3	ENSMUSG00000029661	Col1a2	8.028813805	15.42222034	295	267	0.681	0.708	0.941743109	1.03E-11	3.15E-07	up	Col1a2
Control-vs-T2DM	FB_Cluster_3	ENSMUSG00000036446	Lum	8.423026644	16.88046848	295	267	0.644	0.7	1.002935727	1.11E-09	3.39E-05	up	Lum
Control-vs-T2DM	FB_Cluster_3	ENSMUSG00000026478	Lamc1	9.869586256	15.96384988	295	267	0.766	0.738	0.693741525	1.13E-09	3.44E-05	up	Lamc1
Control-vs-T2DM	FB_Cluster_3	ENSMUSG00000022665	Ccdc80	7.966416026	16.70080668	295	267	0.617	0.697	1.06790559	1.97E-09	6.00E-05	up	Ccdc80
Control-vs-T2DM	FB_Cluster_3	ENSMUSG00000016534	Lamp2	2.374092761	5.465269033	295	267	0.353	0.483	1.20288184	6.46E-09	0.000196996	up	Lamp2
Control-vs-T2DM	FB_Cluster_3	ENSMUSG00000031375	Bgn	9.059857595	17.784903	295	267	0.681	0.708	0.973085015	3.88E-08	0.00118219	up	Bgn
Control-vs-T2DM	FB_Cluster_3	ENSMUSG00000063457	Rps15	3.804796232	5.63081892	295	267	0.529	0.453	0.565513269	4.40E-08	0.00134059	up	Rps15
Control-vs-T2DM	FB_Cluster_3	ENSMUSG00000022816	Fstl1	5.601226599	9.676497186	295	267	0.566	0.592	0.788731257	6.70E-08	0.002041203	up	Fstl1
Control-vs-T2DM	FB_Cluster_3	ENSMUSG00000020571	Pdia6	2.670424985	3.668751763	295	267	0.41	0.333	0.458205233	1.18E-07	0.003604833	up	Pdia6
Control-vs-T2DM	FB_Cluster_3	ENSMUSG00000060636	Rpl35a	4.526057152	7.453009399	295	267	0.556	0.581	0.719555759	2.21E-07	0.006738972	up	Rpl35a
Control-vs-T2DM	FB_Cluster_3	ENSMUSG00000004044	Cavin1	1.255092391	1.673000374	295	267	0.224	0.161	0.414615487	2.88E-07	0.008769781	up	Cavin1
Control-vs-T2DM	FB_Cluster_3	ENSMUSG00000020681	Ace	1.699142182	2.671008577	295	267	0.281	0.258	0.652547136	4.78E-07	0.014580399	up	Ace
Control-vs-T2DM	FB_Cluster_3	ENSMUSG00000037742	Eef1a1	4.750674551	7.76582618	295	267	0.58	0.603	0.708995249	5.63E-07	0.017159075	up	Eef1a1
Control-vs-T2DM	FB_Cluster_3	ENSMUSG00000031825	Crispld2	5.441778058	8.537461211	295	267	0.522	0.487	0.649719388	8.78E-07	0.026768621	up	Crispld2
Control-vs-T2DM	FB_Cluster_3	ENSMUSG00000004207	Psap	6.230736078	8.481398605	295	267	0.705	0.644	0.444893436	9.79E-07	0.029836263	up	Psap
Control-vs-T2DM	FB_Cluster_3	ENSMUSG00000039001	Rps21	5.57125569	8.593798349	295	267	0.617	0.648	0.625284288	1.22E-06	0.03717508	up	Rps21
Control-vs-T2DM	FB_Cluster_3	ENSMUSG00000031502	Col4a1	8.728774808	12.75987773	295	267	0.705	0.648	0.54775821	2.60E-06	0.079377359	up	Col4a1
Control-vs-T2DM	FB_Cluster_3	ENSMUSG00000055447	Cd47	2.527278283	4.371946595	295	267	0.397	0.412	0.790667162	2.76E-06	0.083987507	up	Cd47
Control-vs-T2DM	FB_Cluster_3	ENSMUSG00000001025	S100a6	6.670355644	11.11784128	295	267	0.614	0.64	0.737032451	3.39E-06	0.103375101	up	S100a6
Control-vs-T2DM	FB_Cluster_3	ENSMUSG00000027248	Pdia3	3.864065456	6.326156641	295	267	0.492	0.494	0.711195215	6.82E-06	0.207945062	up	Pdia3
Control-vs-T2DM	FB_Cluster_3	ENSMUSG00000040249	Lrp1	8.00564725	13.22556753	295	267	0.668	0.663	0.724232567	8.06E-06	0.245621917	up	Lrp1
Control-vs-T2DM	FB_Cluster_3	ENSMUSG00000036256	Igfbp7	15.69796753	24.19122753	295	267	0.858	0.846	0.62390297	8.09E-06	0.246726832	up	Igfbp7
Control-vs-T2DM	FB_Cluster_3	ENSMUSG00000064367	mt-Nd5	9.910412005	14.69541484	295	267	0.78	0.835	0.568344405	8.26E-06	0.25177262	up	mt-Nd5
Control-vs-T2DM	FB_Cluster_3	ENSMUSG00000070436	Serpinh1	3.83001107	5.914807909	295	267	0.498	0.457	0.626969477	1.15E-05	0.351782081	up	Serpinh1
Control-vs-T2DM	FB_Cluster_3	ENSMUSG00000005397	Nid1	7.293989523	12.13204444	295	267	0.637	0.663	0.734034767	2.24E-05	0.682201552	up	Nid1
Control-vs-T2DM	FB_Cluster_3	ENSMUSG00000041577	Prelp	2.646606952	4.77708383	295	267	0.373	0.408	0.851961928	2.40E-05	0.731779799	up	Prelp
Control-vs-T2DM	FB_Cluster_3	ENSMUSG00000017466	Timp2	6.334434004	11.09499634	295	267	0.58	0.652	0.808611798	3.33E-05	1	up	Timp2
Control-vs-T2DM	FB_Cluster_3	ENSMUSG00000040488	Ltbp4	7.554026657	12.66949363	295	267	0.586	0.618	0.746033373	3.62E-05	1	up	Ltbp4
Control-vs-T2DM	FB_Cluster_3	ENSMUSG00000001119	Col6a1	4.018467516	6.359671296	295	267	0.481	0.464	0.662293565	6.11E-05	1	up	Col6a1
Control-vs-T2DM	FB_Cluster_3	ENSMUSG00000022748	Cmss1	23.17030921	30.25493139	295	267	0.949	0.966	0.384891558	6.28E-05	1	up	Cmss1
Control-vs-T2DM	FB_Cluster_3	ENSMUSG00000026879	Gsn	142.4591017	253.3240347	295	267	0.98	0.963	0.830435721	6.29E-05	1	up	Gsn
Control-vs-T2DM	FB_Cluster_3	ENSMUSG00000009927	Rps25	2.627523667	4.296208314	295	267	0.383	0.412	0.709338863	6.76E-05	1	up	Rps25
Control-vs-T2DM	FB_Cluster_3	ENSMUSG00000026728	Vim	4.77868132	7.813566053	295	267	0.539	0.596	0.709356847	8.66E-05	1	up	Vim
Control-vs-T2DM	FB_Cluster_3	ENSMUSG00000032334	Loxl1	3.06383563	4.506739921	295	267	0.427	0.386	0.55673022	0.000114864	1	up	Loxl1
Control-vs-T2DM	FB_Cluster_3	ENSMUSG00000093674	Rpl41	3.609466566	6.148084464	295	267	0.461	0.517	0.768334841	0.000133092	1	up	Rpl41
Control-vs-T2DM	FB_Cluster_3	ENSMUSG00000023886	Smoc2	6.493424958	9.756892778	295	267	0.6	0.581	0.587434714	0.000135913	1	up	Smoc2
Control-vs-T2DM	FB_Cluster_3	ENSMUSG00000021186	Fbln5	1.737568474	3.448129649	295	267	0.278	0.318	0.988703	0.000142496	1	up	Fbln5
Control-vs-T2DM	FB_Cluster_3	ENSMUSG00000029614	Rpl6	2.865491886	4.010053809	295	267	0.417	0.39	0.484824414	0.000150821	1	up	Rpl6
Control-vs-T2DM	FB_Cluster_3	ENSMUSG00000046364	Rpl27a	5.517848232	7.228865186	295	267	0.593	0.554	0.389657221	0.00015111	1	up	Rpl27a
Control-vs-T2DM	FB_Cluster_3	ENSMUSG00000069919	Hba-a1	0.231085638	1.021433409	295	267	0.037	0.131	2.143612707	0.000160373	1	up	Hba-a1
Control-vs-T2DM	FB_Cluster_3	ENSMUSG00000037206	Islr	3.078906468	5.280618603	295	267	0.373	0.408	0.778269368	0.000173781	1	up	Islr
Control-vs-T2DM	FB_Cluster_3	ENSMUSG00000019278	Dpep1	5.951578219	7.732510139	295	267	0.603	0.532	0.377658949	0.000250769	1	up	Dpep1
Control-vs-T2DM	FB_Cluster_3	ENSMUSG00000029580	Actb	6.91698117	10.28254706	295	267	0.627	0.659	0.571976414	0.000355522	1	up	Actb
Control-vs-T2DM	FB_Cluster_3	ENSMUSG00000106918	Mrpl33	1.554631932	2.11570696	295	267	0.271	0.221	0.444542154	0.000357451	1	up	Mrpl33
Control-vs-T2DM	FB_Cluster_3	ENSMUSG00000001289	Pfdn5	2.167188438	2.796945635	295	267	0.322	0.277	0.368012621	0.000377706	1	up	Pfdn5
Control-vs-T2DM	FB_Cluster_3	ENSMUSG00000046330	Rpl37a	4.222314865	5.725188986	295	267	0.515	0.509	0.439280181	0.000410548	1	up	Rpl37a
Control-vs-T2DM	FB_Cluster_3	ENSMUSG00000032216	Nedd4	5.209637351	6.783343698	295	267	0.603	0.562	0.38080722	0.000431115	1	up	Nedd4
Control-vs-T2DM	FB_Cluster_3	ENSMUSG00000073702	Rpl31	1.472351428	2.48306114	295	267	0.264	0.281	0.753957841	0.00045572	1	up	Rpl31
Control-vs-T2DM	FB_Cluster_3	ENSMUSG00000022894	Adamts5	6.297506566	8.537854963	295	267	0.559	0.517	0.439086923	0.000509122	1	up	Adamts5
Control-vs-T2DM	FB_Cluster_3	ENSMUSG00000002602	Axl	2.402615648	4.153130872	295	267	0.349	0.412	0.78956815	0.000517802	1	up	Axl
Control-vs-T2DM	FB_Cluster_3	ENSMUSG00000028108	Ecm1	2.605089903	4.982844373	295	267	0.305	0.348	0.935609928	0.000548047	1	up	Ecm1
Control-vs-T2DM	FB_Cluster_3	ENSMUSG00000027864	Ptgfrn	1.024029734	1.599816332	295	267	0.166	0.154	0.643597977	0.000570333	1	up	Ptgfrn
Control-vs-T2DM	FB_Cluster_3	ENSMUSG00000031765	Mt1	1.505892232	2.469709133	295	267	0.261	0.255	0.713685226	0.000592199	1	up	Mt1
Control-vs-T2DM	FB_Cluster_3	ENSMUSG00000061080	Lsamp	4.216287284	7.029504291	295	267	0.38	0.303	0.737436092	0.000618298	1	up	Lsamp
Control-vs-T2DM	FB_Cluster_3	ENSMUSG00000019929	Dcn	77.21017655	117.0417547	295	267	0.983	0.966	0.600159751	0.00072248	1	up	Dcn
Control-vs-T2DM	FB_Cluster_3	ENSMUSG00000025809	Itgb1	5.561498413	7.514575291	295	267	0.617	0.592	0.434211191	0.00079404	1	up	Itgb1
Control-vs-T2DM	FB_Cluster_3	ENSMUSG00000028234	Rps20	4.855610213	6.633271606	295	267	0.576	0.539	0.450060024	0.000807512	1	up	Rps20
Control-vs-T2DM	FB_Cluster_3	ENSMUSG00000069662	Marcks	1.088488372	2.224662889	295	267	0.2	0.236	1.031193054	0.000811263	1	up	Marcks
Control-vs-T2DM	FB_Cluster_3	ENSMUSG00000074884	Serf2	3.701379197	4.962296979	295	267	0.498	0.487	0.422935231	0.000882493	1	up	Serf2
Control-vs-T2DM	FB_Cluster_3	ENSMUSG00000020241	Col6a2	3.765370974	5.700008752	295	267	0.447	0.449	0.59815912	0.000991823	1	up	Col6a2
Control-vs-T2DM	FB_Cluster_3	ENSMUSG00000075702	Selenom	1.973569794	2.599362806	295	267	0.305	0.258	0.397332874	0.000996571	1	up	Selenom
Control-vs-T2DM	FB_Cluster_3	ENSMUSG00000006800	Sulf2	1.098090135	2.2890857	295	267	0.186	0.24	1.059706643	0.001034276	1	up	Sulf2
Control-vs-T2DM	FB_Cluster_3	ENSMUSG00000020814	Mxra7	1.044403899	1.437900446	295	267	0.197	0.165	0.461246245	0.001382713	1	up	Mxra7
Control-vs-T2DM	FB_Cluster_3	ENSMUSG00000041841	Rpl37	4.361260732	6.518847616	295	267	0.522	0.558	0.57986076	0.001432156	1	up	Rpl37
Control-vs-T2DM	FB_Cluster_3	ENSMUSG00000017707	Serinc3	2.191519622	2.822949	295	267	0.332	0.3	0.365256744	0.001450712	1	up	Serinc3
Control-vs-T2DM	FB_Cluster_3	ENSMUSG00000001105	Ift20	0.342131064	1.119542946	295	267	0.064	0.146	1.709996106	0.001480042	1	up	Ift20
Control-vs-T2DM	FB_Cluster_3	ENSMUSG00000065947	mt-Nd4l	3.494867771	4.894130267	295	267	0.458	0.487	0.485802828	0.001523717	1	up	mt-Nd4l
Control-vs-T2DM	FB_Cluster_3	ENSMUSG00000020467	Efemp1	1.549846311	2.090403733	295	267	0.231	0.184	0.431632378	0.001687048	1	up	Efemp1
Control-vs-T2DM	FB_Cluster_3	ENSMUSG00000021226	Acot2	0.393341773	1.049662697	295	267	0.064	0.157	1.41584119	0.001741333	1	up	Acot2
Control-vs-T2DM	FB_Cluster_3	ENSMUSG00000050708	Ftl1	6.963479276	9.603678503	295	267	0.614	0.584	0.463773089	0.001937164	1	up	Ftl1
Control-vs-T2DM	FB_Cluster_3	ENSMUSG00000038521	C1s1	2.111630929	3.543003354	295	267	0.308	0.333	0.746587528	0.002098412	1	up	C1s1
Control-vs-T2DM	FB_Cluster_3	ENSMUSG00000061983	Rps12	4.686484919	7.320328955	295	267	0.542	0.599	0.643391164	0.002656589	1	up	Rps12
Control-vs-T2DM	FB_Cluster_3	ENSMUSG00000055632	Hmcn2	1.26504266	2.21795169	295	267	0.18	0.187	0.809992912	0.003058179	1	up	Hmcn2
Control-vs-T2DM	FB_Cluster_3	ENSMUSG00000026249	Serpine2	2.333475907	3.695398987	295	267	0.325	0.326	0.663226782	0.003331114	1	up	Serpine2
Control-vs-T2DM	FB_Cluster_3	ENSMUSG00000021939	Ctsb	2.325942353	3.653206554	295	267	0.325	0.367	0.651325451	0.003483281	1	up	Ctsb
Control-vs-T2DM	FB_Cluster_3	ENSMUSG00000003032	Klf4	0.681820659	1.84265616	295	267	0.119	0.169	1.434189384	0.00352035	1	up	Klf4
Control-vs-T2DM	FB_Cluster_3	ENSMUSG00000026399	Cd55	1.085303525	2.221549985	295	267	0.186	0.255	1.033400043	0.003898273	1	up	Cd55
Control-vs-T2DM	FB_Cluster_3	ENSMUSG00000024853	Sf3b2	1.241882537	2.020663298	295	267	0.21	0.21	0.702255453	0.003950489	1	up	Sf3b2
Control-vs-T2DM	FB_Cluster_3	ENSMUSG00000001440	Kpnb1	0.266489225	0.961773035	295	267	0.054	0.116	1.851228002	0.004379016	1	up	Kpnb1
Control-vs-T2DM	FB_Cluster_3	ENSMUSG00000021756	Il6st	2.241820178	3.451877226	295	267	0.336	0.363	0.622688034	0.004415571	1	up	Il6st
Control-vs-T2DM	FB_Cluster_3	ENSMUSG00000029659	Medag	1.909152493	2.656658216	295	267	0.312	0.27	0.476659031	0.004471181	1	up	Medag
Control-vs-T2DM	FB_Cluster_3	ENSMUSG00000020473	Aebp1	2.486795834	4.170662997	295	267	0.298	0.345	0.745965254	0.004595271	1	up	Aebp1
Control-vs-T2DM	FB_Cluster_3	ENSMUSG00000004460	Dnajb11	0.938017463	1.611585437	295	267	0.183	0.191	0.780729709	0.005259053	1	up	Dnajb11
Control-vs-T2DM	FB_Cluster_3	ENSMUSG00000018326	Ywhab	0.922669069	1.762917161	295	267	0.153	0.199	0.934004967	0.005805059	1	up	Ywhab
Control-vs-T2DM	FB_Cluster_3	ENSMUSG00000024012	Mtch1	1.607831026	2.328144533	295	267	0.254	0.251	0.534037069	0.006309369	1	up	Mtch1
Control-vs-T2DM	FB_Cluster_3	ENSMUSG00000030342	Cd9	2.828597738	3.873435306	295	267	0.356	0.348	0.453512864	0.006889144	1	up	Cd9
Control-vs-T2DM	FB_Cluster_3	ENSMUSG00000078974	Sec61g	1.388286116	1.879157879	295	267	0.231	0.202	0.436754209	0.007066636	1	up	Sec61g
Control-vs-T2DM	FB_Cluster_3	ENSMUSG00000035392	Dennd1a	1.513434148	2.393411452	295	267	0.278	0.277	0.661207483	0.007832493	1	up	Dennd1a
Control-vs-T2DM	FB_Cluster_3	ENSMUSG00000003402	Prkcsh	0.681230806	1.04001819	295	267	0.129	0.127	0.610320129	0.008140117	1	up	Prkcsh
Control-vs-T2DM	FB_Cluster_3	ENSMUSG00000022032	Scara5	3.111444233	4.437031017	295	267	0.386	0.397	0.511996398	0.008358662	1	up	Scara5
Control-vs-T2DM	FB_Cluster_3	ENSMUSG00000035258	Abi3bp	2.273760397	2.991676158	295	267	0.329	0.303	0.395858555	0.008793412	1	up	Abi3bp
Control-vs-T2DM	FB_Cluster_3	ENSMUSG00000021270	Hsp90aa1	1.104732011	1.541087323	295	267	0.197	0.176	0.480215199	0.008849705	1	up	Hsp90aa1
Control-vs-T2DM	FB_Cluster_3	ENSMUSG00000018339	Gpx3	5.06707614	6.991981888	295	267	0.546	0.543	0.464540102	0.010421759	1	up	Gpx3
Control-vs-T2DM	FB_Cluster_3	ENSMUSG00000025232	Hexa	0.914298162	1.354215967	295	267	0.163	0.157	0.566669956	0.010605882	1	up	Hexa
Control-vs-T2DM	FB_Cluster_3	ENSMUSG00000060591	Ifitm2	3.870233447	5.66077608	295	267	0.468	0.491	0.548567476	0.010641746	1	up	Ifitm2
Control-vs-T2DM	FB_Cluster_3	ENSMUSG00000090733	Rps27	3.184974655	5.017862717	295	267	0.417	0.457	0.655774564	0.011727675	1	up	Rps27
Control-vs-T2DM	FB_Cluster_3	ENSMUSG00000019539	Rcn3	2.055061851	3.395299326	295	267	0.302	0.352	0.724329241	0.013078968	1	up	Rcn3
Control-vs-T2DM	FB_Cluster_3	ENSMUSG00000015085	Entpd2	2.590893348	3.72021907	295	267	0.359	0.371	0.521921047	0.014018913	1	up	Entpd2
Control-vs-T2DM	FB_Cluster_3	ENSMUSG00000032997	Chpf	0.371158088	0.941477351	295	267	0.078	0.109	1.34265716	0.015566518	1	up	Chpf
Control-vs-T2DM	FB_Cluster_3	ENSMUSG00000021614	Vcan	2.294409948	3.500333893	295	267	0.295	0.292	0.609347699	0.015770443	1	up	Vcan
Control-vs-T2DM	FB_Cluster_3	ENSMUSG00000038056	Kmt2c	1.530399208	2.153624616	295	267	0.268	0.266	0.492831495	0.016203349	1	up	Kmt2c
Control-vs-T2DM	FB_Cluster_3	ENSMUSG00000038633	Degs1	0.954383551	1.552828467	295	267	0.166	0.165	0.702199135	0.017403836	1	up	Degs1
Control-vs-T2DM	FB_Cluster_3	ENSMUSG00000026223	Itm2c	1.118418226	2.117095826	295	267	0.176	0.236	0.92056595	0.019208377	1	up	Itm2c
Control-vs-T2DM	FB_Cluster_3	ENSMUSG00000028412	Slc44a1	2.025655277	3.129738147	295	267	0.319	0.337	0.627628154	0.019802309	1	up	Slc44a1
Control-vs-T2DM	FB_Cluster_3	ENSMUSG00000053119	Chmp3	0.496241324	0.805383942	295	267	0.105	0.101	0.698523252	0.020226873	1	up	Chmp3
Control-vs-T2DM	FB_Cluster_3	ENSMUSG00000060012	Kif13b	1.465091299	2.14069064	295	267	0.244	0.221	0.547054675	0.020607376	1	up	Kif13b
Control-vs-T2DM	FB_Cluster_3	ENSMUSG00000002847	Pla1a	1.456630057	2.259328998	295	267	0.22	0.24	0.633224662	0.020808278	1	up	Pla1a
Control-vs-T2DM	FB_Cluster_3	ENSMUSG00000017493	Igfbp4	4.187754069	5.468044826	295	267	0.461	0.461	0.384840283	0.021046702	1	up	Igfbp4
Control-vs-T2DM	FB_Cluster_3	ENSMUSG00000025823	Pdia4	0.62916577	0.930691151	295	267	0.129	0.116	0.564788028	0.021206812	1	up	Pdia4
Control-vs-T2DM	FB_Cluster_3	ENSMUSG00000024140	Epas1	0.87486047	1.186040823	295	267	0.166	0.127	0.438985558	0.021568908	1	up	Epas1
Control-vs-T2DM	FB_Cluster_3	ENSMUSG00000021127	Zfp36l1	1.401171852	2.478710282	295	267	0.234	0.303	0.822910987	0.022419377	1	up	Zfp36l1
Control-vs-T2DM	FB_Cluster_3	ENSMUSG00000039168	Dap	0.413887045	0.984404151	295	267	0.078	0.131	1.249811669	0.023757511	1	up	Dap
Control-vs-T2DM	FB_Cluster_3	ENSMUSG00000001794	Capns1	1.288285524	1.656631113	295	267	0.197	0.18	0.362775116	0.026154128	1	up	Capns1
Control-vs-T2DM	FB_Cluster_3	ENSMUSG00000035212	Leprot	0.534916613	1.03357147	295	267	0.108	0.124	0.950122135	0.027309484	1	up	Leprot
Control-vs-T2DM	FB_Cluster_3	ENSMUSG00000041959	S100a10	1.547439792	2.03804178	295	267	0.241	0.24	0.397277907	0.031891615	1	up	S100a10
Control-vs-T2DM	FB_Cluster_3	ENSMUSG00000041548	Hspb8	0.808475073	1.106609421	295	267	0.153	0.139	0.452822844	0.033633755	1	up	Hspb8
Control-vs-T2DM	FB_Cluster_3	ENSMUSG00000032116	Stt3a	0.592347274	0.994298893	295	267	0.115	0.131	0.747137927	0.033936049	1	up	Stt3a
Control-vs-T2DM	FB_Cluster_3	ENSMUSG00000050912	Tmem123	0.429320119	0.821268629	295	267	0.088	0.109	0.935640063	0.034189011	1	up	Tmem123
Control-vs-T2DM	FB_Cluster_3	ENSMUSG00000016256	Ctsz	1.87775749	2.61020507	295	267	0.288	0.281	0.475130845	0.034514013	1	up	Ctsz
Control-vs-T2DM	FB_Cluster_3	ENSMUSG00000025732	Mcrip2	0.640584083	0.886185494	295	267	0.112	0.101	0.468158351	0.038456867	1	up	Mcrip2
Control-vs-T2DM	FB_Cluster_3	ENSMUSG00000024940	Ltbp3	0.955116943	1.435787884	295	267	0.173	0.176	0.588042775	0.039964629	1	up	Ltbp3
Control-vs-T2DM	FB_Cluster_3	ENSMUSG00000062997	Rpl35	2.10632744	2.999684007	295	267	0.319	0.333	0.510060406	0.041290586	1	up	Rpl35
Control-vs-T2DM	FB_Cluster_3	ENSMUSG00000029672	Fam3c	0.782230359	1.007294083	295	267	0.142	0.127	0.364778307	0.042657477	1	up	Fam3c
Control-vs-T2DM	FB_Cluster_3	ENSMUSG00000023010	Tmbim6	1.504187524	2.123889385	295	267	0.244	0.258	0.497696211	0.044077331	1	up	Tmbim6
Control-vs-T2DM	FB_Cluster_3	ENSMUSG00000054693	Adam10	0.731460729	1.420563996	295	267	0.139	0.206	0.957515844	0.044308968	1	up	Adam10
Control-vs-T2DM	FB_Cluster_3	ENSMUSG00000038342	Mlxip	0.578440532	0.750075766	295	267	0.122	0.094	0.374810623	0.044573592	1	up	Mlxip
Control-vs-T2DM	FB_Cluster_3	ENSMUSG00000002028	Kmt2a	1.27972371	1.674818984	295	267	0.224	0.206	0.388146216	0.045139274	1	up	Kmt2a
Control-vs-T2DM	FB_Cluster_3	ENSMUSG00000073616	Cops9	0.600661587	0.817352344	295	267	0.108	0.094	0.444342059	0.045367539	1	up	Cops9
Control-vs-T2DM	FB_Cluster_3	ENSMUSG00000019873	Reep3	0.84944008	1.205402242	295	267	0.156	0.142	0.504880416	0.045906011	1	up	Reep3
Control-vs-T2DM	FB_Cluster_3	ENSMUSG00000055053	Nfic	1.414299056	2.336567469	295	267	0.237	0.273	0.724263222	0.046495007	1	up	Nfic
Control-vs-T2DM	FB_Cluster_3	ENSMUSG00000030754	Copb1	0.871341015	1.562087644	295	267	0.139	0.206	0.842092834	0.04671763	1	up	Copb1
Control-vs-T2DM	FB_Cluster_3	ENSMUSG00000027533	Fabp5	1.074932822	1.636796833	295	267	0.183	0.195	0.60658269	0.048086584	1	up	Fabp5
Control-vs-T2DM	FB_Cluster_3	ENSMUSG00000024713	Pcsk5	0.804583626	1.226480391	295	267	0.142	0.101	0.608148211	0.048180661	1	up	Pcsk5
Control-vs-T2DM	FB_Cluster_3	ENSMUSG00000054364	Rhob	0.89262056	1.434043552	295	267	0.146	0.172	0.683908881	0.048936493	1	up	Rhob
Control-vs-T2DM	FB_Cluster_4	ENSMUSG00000032612	Usp4	0.365236304	0.831866432	140	124	0.057	0.218	1.187300195	1.75E-05	0.532088345	up	Usp4
Control-vs-T2DM	FB_Cluster_4	ENSMUSG00000032913	Lrig2	0.331583368	1.417304942	140	124	0.071	0.282	2.095373407	2.20E-05	0.669149143	up	Lrig2
Control-vs-T2DM	FB_Cluster_4	ENSMUSG00000053819	Camk2d	3.004785133	4.094899611	140	124	0.4	0.637	0.446553472	7.99E-05	1	up	Camk2d
Control-vs-T2DM	FB_Cluster_4	ENSMUSG00000032006	Pdgfd	2.142294409	4.001848963	140	124	0.279	0.532	0.901478668	8.75E-05	1	up	Pdgfd
Control-vs-T2DM	FB_Cluster_4	ENSMUSG00000057649	Brd9	0.336376277	0.680685174	140	124	0.05	0.177	1.016694827	0.000104467	1	up	Brd9
Control-vs-T2DM	FB_Cluster_4	ENSMUSG00000022629	Kif21a	0.043298791	0.488488711	140	124	0.007	0.113	3.492893788	0.000310956	1	up	Kif21a
Control-vs-T2DM	FB_Cluster_4	ENSMUSG00000035173	Ccdc186	0.887432658	1.763971311	140	124	0.164	0.371	0.991036771	0.000352914	1	up	Ccdc186
Control-vs-T2DM	FB_Cluster_4	ENSMUSG00000037361	Sf3b6	0.395992203	1.174129176	140	124	0.086	0.266	1.567805803	0.000364873	1	up	Sf3b6
Control-vs-T2DM	FB_Cluster_4	ENSMUSG00000028917	Plekhm2	0.641038661	1.149328683	140	124	0.107	0.266	0.842208644	0.000398438	1	up	Plekhm2
Control-vs-T2DM	FB_Cluster_4	ENSMUSG00000037470	Uggt1	0.411567905	0.977012488	140	124	0.079	0.234	1.247043682	0.000414254	1	up	Uggt1
Control-vs-T2DM	FB_Cluster_4	ENSMUSG00000028580	Pum1	1.078406611	1.73913827	140	124	0.193	0.379	0.689420571	0.000494479	1	up	Pum1
Control-vs-T2DM	FB_Cluster_4	ENSMUSG00000028646	Rragc	0.103573975	0.659120943	140	124	0.021	0.145	2.66870829	0.000547565	1	up	Rragc
Control-vs-T2DM	FB_Cluster_4	ENSMUSG00000043154	Ppp2r3a	2.552644814	3.657954112	140	124	0.343	0.565	0.519027091	0.00056913	1	up	Ppp2r3a
Control-vs-T2DM	FB_Cluster_4	ENSMUSG00000038002	Cramp1l	0.103559707	0.711286276	140	124	0.021	0.145	2.778777923	0.000589805	1	up	Cramp1l
Control-vs-T2DM	FB_Cluster_4	ENSMUSG00000047146	Tet1	0.141008469	0.533359608	140	124	0.014	0.113	1.91857446	0.000596977	1	up	Tet1
Control-vs-T2DM	FB_Cluster_4	ENSMUSG00000026131	Dst	5.537780743	7.464913952	140	124	0.629	0.831	0.430810971	0.000639678	1	up	Dst
Control-vs-T2DM	FB_Cluster_4	ENSMUSG00000022564	Grina	0.728580869	1.329704224	140	124	0.143	0.323	0.867854846	0.000645197	1	up	Grina
Control-vs-T2DM	FB_Cluster_4	ENSMUSG00000020903	Stx8	0.463867668	1.064414328	140	124	0.079	0.234	1.198099191	0.000730581	1	up	Stx8
Control-vs-T2DM	FB_Cluster_4	ENSMUSG00000029123	Stk32b	0.03469933	0.464723211	140	124	0.007	0.105	3.739550666	0.000782216	1	up	Stk32b
Control-vs-T2DM	FB_Cluster_4	ENSMUSG00000017897	Eya2	1.238117573	2.820118123	140	124	0.193	0.403	1.187541909	0.000816626	1	up	Eya2
Control-vs-T2DM	FB_Cluster_4	ENSMUSG00000029684	Wasl	1.257722838	1.62611872	140	124	0.207	0.355	0.370592572	0.000839375	1	up	Wasl
Control-vs-T2DM	FB_Cluster_4	ENSMUSG00000036769	Wdr44	0.922332985	1.721705923	140	124	0.15	0.331	0.900406529	0.001006544	1	up	Wdr44
Control-vs-T2DM	FB_Cluster_4	ENSMUSG00000017670	Elmo2	0.053413542	0.453450049	140	124	0.014	0.121	3.083285823	0.001076533	1	up	Elmo2
Control-vs-T2DM	FB_Cluster_4	ENSMUSG00000070871	Ccnyl1	0.053690939	0.462595495	140	124	0.014	0.121	3.104627971	0.001092389	1	up	Ccnyl1
Control-vs-T2DM	FB_Cluster_4	ENSMUSG00000029723	Tsc22d4	1.061858197	1.907383823	140	124	0.207	0.403	0.844943845	0.001148683	1	up	Tsc22d4
Control-vs-T2DM	FB_Cluster_4	ENSMUSG00000034729	Mrps10	0.090778861	0.572307767	140	124	0.021	0.137	2.655026584	0.001157049	1	up	Mrps10
Control-vs-T2DM	FB_Cluster_4	ENSMUSG00000000134	Tfe3	0.107634929	0.451179338	140	124	0.021	0.129	2.066534654	0.001170016	1	up	Tfe3
Control-vs-T2DM	FB_Cluster_4	ENSMUSG00000029247	Paics	0.111939797	0.390388439	140	124	0.014	0.105	1.801268556	0.001222376	1	up	Paics
Control-vs-T2DM	FB_Cluster_4	ENSMUSG00000055531	Cpsf6	0.839192337	1.362853075	140	124	0.143	0.298	0.699490578	0.00128289	1	up	Cpsf6
Control-vs-T2DM	FB_Cluster_4	ENSMUSG00000025647	Shisa5	0.525328411	1.005116563	140	124	0.1	0.242	0.935940229	0.001351107	1	up	Shisa5
Control-vs-T2DM	FB_Cluster_4	ENSMUSG00000034820	Cpsf7	0.31639652	1.025655354	140	124	0.071	0.226	1.696425143	0.001404414	1	up	Cpsf7
Control-vs-T2DM	FB_Cluster_4	ENSMUSG00000024383	Map3k2	1.036461416	1.443306856	140	124	0.193	0.339	0.477672415	0.001636409	1	up	Map3k2
Control-vs-T2DM	FB_Cluster_4	ENSMUSG00000026483	Fam129a	1.643564863	2.411362334	140	124	0.257	0.444	0.552992107	0.001656874	1	up	Fam129a
Control-vs-T2DM	FB_Cluster_4	ENSMUSG00000021945	Zmym2	1.276566926	1.890272912	140	124	0.221	0.395	0.566288677	0.001745604	1	up	Zmym2
Control-vs-T2DM	FB_Cluster_4	ENSMUSG00000078866	Zfp970	0.142515939	0.641923352	140	124	0.029	0.145	2.170490545	0.001834425	1	up	Zfp970
Control-vs-T2DM	FB_Cluster_4	ENSMUSG00000039197	Adk	1.736068375	2.617608257	140	124	0.3	0.5	0.59239745	0.001898322	1	up	Adk
Control-vs-T2DM	FB_Cluster_4	ENSMUSG00000028991	Mtor	0.519948229	1.028949681	140	124	0.086	0.218	0.984595307	0.002098319	1	up	Mtor
Control-vs-T2DM	FB_Cluster_4	ENSMUSG00000036097	Slf2	0.706165439	1.465889729	140	124	0.129	0.298	1.05359259	0.002112712	1	up	Slf2
Control-vs-T2DM	FB_Cluster_4	ENSMUSG00000087687	Pet100	0.084163518	0.496830376	140	124	0.021	0.129	2.560063677	0.002199021	1	up	Pet100
Control-vs-T2DM	FB_Cluster_4	ENSMUSG00000073805	Insyn2a	0.352767614	0.90973414	140	124	0.071	0.21	1.366476544	0.00232784	1	up	Insyn2a
Control-vs-T2DM	FB_Cluster_4	ENSMUSG00000029185	Fam114a1	1.421247925	2.126838108	140	124	0.229	0.395	0.581518305	0.002444601	1	up	Fam114a1
Control-vs-T2DM	FB_Cluster_4	ENSMUSG00000040720	Virma	0.576728688	0.977001517	140	124	0.107	0.234	0.760365542	0.00269332	1	up	Virma
Control-vs-T2DM	FB_Cluster_4	ENSMUSG00000027433	Xrn2	0.855693979	1.303996394	140	124	0.164	0.315	0.607715079	0.002870762	1	up	Xrn2
Control-vs-T2DM	FB_Cluster_4	ENSMUSG00000028180	Zranb2	0.948154276	1.283293306	140	124	0.186	0.323	0.436617486	0.00289542	1	up	Zranb2
Control-vs-T2DM	FB_Cluster_4	ENSMUSG00000038059	Smim3	0.183175323	0.478151722	140	124	0.029	0.121	1.383757618	0.002896045	1	up	Smim3
Control-vs-T2DM	FB_Cluster_4	ENSMUSG00000038095	Sbno1	0.595171379	1.216479625	140	124	0.107	0.258	1.031211312	0.00292891	1	up	Sbno1
Control-vs-T2DM	FB_Cluster_4	ENSMUSG00000032186	Tmod2	0.321459055	0.779081231	140	124	0.057	0.177	1.27687521	0.002935836	1	up	Tmod2
Control-vs-T2DM	FB_Cluster_4	ENSMUSG00000027668	Mfn1	0.709085977	1.001684938	140	124	0.121	0.242	0.498336911	0.003054807	1	up	Mfn1
Control-vs-T2DM	FB_Cluster_4	ENSMUSG00000025234	Arih1	1.910140502	2.872414216	140	124	0.321	0.516	0.588559746	0.003080397	1	up	Arih1
Control-vs-T2DM	FB_Cluster_4	ENSMUSG00000033282	Rpgrip1l	0.246670429	0.499662384	140	124	0.036	0.121	1.018072796	0.003133176	1	up	Rpgrip1l
Control-vs-T2DM	FB_Cluster_4	ENSMUSG00000028970	Abcb1b	0.190033925	0.631794152	140	124	0.029	0.129	1.732666945	0.00326737	1	up	Abcb1b
Control-vs-T2DM	FB_Cluster_4	ENSMUSG00000020978	Klhdc2	0.237700769	1.006729746	140	124	0.057	0.185	2.08199446	0.003293596	1	up	Klhdc2
Control-vs-T2DM	FB_Cluster_4	ENSMUSG00000021068	Nin	0.583624945	1.004809253	140	124	0.1	0.226	0.783704599	0.00331515	1	up	Nin
Control-vs-T2DM	FB_Cluster_4	ENSMUSG00000041794	Myrip	1.265407775	1.738784032	140	124	0.171	0.315	0.45844535	0.00333434	1	up	Myrip
Control-vs-T2DM	FB_Cluster_4	ENSMUSG00000026491	Ahctf1	1.044676194	1.350490034	140	124	0.193	0.315	0.370395887	0.003528805	1	up	Ahctf1
Control-vs-T2DM	FB_Cluster_4	ENSMUSG00000024644	Cndp2	0.109992906	0.383553984	140	124	0.021	0.113	1.801084224	0.003697047	1	up	Cndp2
Control-vs-T2DM	FB_Cluster_4	ENSMUSG00000044340	Phlpp1	1.615573875	2.477735435	140	124	0.25	0.427	0.616944356	0.003772631	1	up	Phlpp1
Control-vs-T2DM	FB_Cluster_4	ENSMUSG00000043262	Uevld	0.282996895	0.48054639	140	124	0.036	0.121	0.763679971	0.003808823	1	up	Uevld
Control-vs-T2DM	FB_Cluster_4	ENSMUSG00000069495	Epc2	0.821824733	1.510820126	140	124	0.15	0.306	0.878349203	0.003909992	1	up	Epc2
Control-vs-T2DM	FB_Cluster_4	ENSMUSG00000029328	Hnrnpdl	1.26733169	2.082361589	140	124	0.236	0.419	0.716381892	0.003910173	1	up	Hnrnpdl
Control-vs-T2DM	FB_Cluster_4	ENSMUSG00000026074	Map4k4	2.565860132	4.134709754	140	124	0.379	0.581	0.688322196	0.004065339	1	up	Map4k4
Control-vs-T2DM	FB_Cluster_4	ENSMUSG00000035067	Xkr6	0.075905972	0.486681545	140	124	0.021	0.121	2.679089794	0.004090895	1	up	Xkr6
Control-vs-T2DM	FB_Cluster_4	ENSMUSG00000015961	Adss	0.156054708	0.54641866	140	124	0.029	0.129	1.807294693	0.004229768	1	up	Adss
Control-vs-T2DM	FB_Cluster_4	ENSMUSG00000031921	Terf2	0.177524857	0.685170251	140	124	0.043	0.161	1.947839567	0.004587169	1	up	Terf2
Control-vs-T2DM	FB_Cluster_4	ENSMUSG00000029920	Smarcad1	0.570796315	1.079366342	140	124	0.121	0.266	0.919017605	0.004626248	1	up	Smarcad1
Control-vs-T2DM	FB_Cluster_4	ENSMUSG00000034621	Gpatch8	2.033602698	3.254981326	140	124	0.329	0.524	0.678584798	0.004671007	1	up	Gpatch8
Control-vs-T2DM	FB_Cluster_4	ENSMUSG00000063358	Mapk1	0.955798825	1.487470719	140	124	0.193	0.347	0.638028423	0.005046823	1	up	Mapk1
Control-vs-T2DM	FB_Cluster_4	ENSMUSG00000031538	Plat	0.825411118	1.415141245	140	124	0.129	0.266	0.777688448	0.005094641	1	up	Plat
Control-vs-T2DM	FB_Cluster_4	ENSMUSG00000028576	Ift74	0.244396823	0.634181952	140	124	0.05	0.161	1.37530857	0.00517623	1	up	Ift74
Control-vs-T2DM	FB_Cluster_4	ENSMUSG00000042737	Dpm3	0.500776144	0.722634205	140	124	0.086	0.185	0.529011274	0.005185537	1	up	Dpm3
Control-vs-T2DM	FB_Cluster_4	ENSMUSG00000035992	Fnip1	1.99291439	2.569287656	140	124	0.279	0.444	0.366472447	0.005388138	1	up	Fnip1
Control-vs-T2DM	FB_Cluster_4	ENSMUSG00000062929	Cfl2	1.292878312	1.668009685	140	124	0.207	0.339	0.367516079	0.005558163	1	up	Cfl2
Control-vs-T2DM	FB_Cluster_4	ENSMUSG00000005142	Man2b1	0.235774551	0.761824076	140	124	0.05	0.169	1.691627471	0.005564484	1	up	Man2b1
Control-vs-T2DM	FB_Cluster_4	ENSMUSG00000037148	Arhgap10	1.506755596	2.861414986	140	124	0.286	0.476	0.925237995	0.005615282	1	up	Arhgap10
Control-vs-T2DM	FB_Cluster_4	ENSMUSG00000058291	Zfp68	0.131449465	0.538666507	140	124	0.029	0.129	2.034054782	0.005896512	1	up	Zfp68
Control-vs-T2DM	FB_Cluster_4	ENSMUSG00000000739	Sult5a1	0.957565917	1.763781759	140	124	0.15	0.306	0.881159491	0.006315928	1	up	Sult5a1
Control-vs-T2DM	FB_Cluster_4	ENSMUSG00000029617	Ccz1	0.355881167	0.808031486	140	124	0.071	0.194	1.182789125	0.00639823	1	up	Ccz1
Control-vs-T2DM	FB_Cluster_4	ENSMUSG00000030166	Rad52	0.122313022	0.392847043	140	124	0.021	0.105	1.682577864	0.006440172	1	up	Rad52
Control-vs-T2DM	FB_Cluster_4	ENSMUSG00000048264	Dip2c	3.682455877	5.146218121	140	124	0.443	0.637	0.482833224	0.006525315	1	up	Dip2c
Control-vs-T2DM	FB_Cluster_4	ENSMUSG00000000711	Rab5b	0.325989902	0.801756799	140	124	0.064	0.185	1.298074848	0.006567172	1	up	Rab5b
Control-vs-T2DM	FB_Cluster_4	ENSMUSG00000039270	Megf9	0.409858822	0.923177566	140	124	0.057	0.169	1.171285427	0.006633653	1	up	Megf9
Control-vs-T2DM	FB_Cluster_4	ENSMUSG00000031808	Slc27a1	0.147875728	0.472881765	140	124	0.029	0.121	1.67642401	0.006661794	1	up	Slc27a1
Control-vs-T2DM	FB_Cluster_4	ENSMUSG00000057614	Gnai1	1.561429355	2.137718945	140	124	0.171	0.306	0.453179984	0.007175374	1	up	Gnai1
Control-vs-T2DM	FB_Cluster_4	ENSMUSG00000059263	Usp47	1.098013868	1.680421186	140	124	0.193	0.339	0.613881069	0.007252466	1	up	Usp47
Control-vs-T2DM	FB_Cluster_4	ENSMUSG00000048612	Myof	0.97640718	1.317069526	140	124	0.171	0.298	0.431738483	0.007254018	1	up	Myof
Control-vs-T2DM	FB_Cluster_4	ENSMUSG00000020900	Myh10	0.533830531	0.803745555	140	124	0.1	0.202	0.590266291	0.007389654	1	up	Myh10
Control-vs-T2DM	FB_Cluster_4	ENSMUSG00000022052	Ppp2r2a	0.989392803	1.423488801	140	124	0.164	0.298	0.52477137	0.007503042	1	up	Ppp2r2a
Control-vs-T2DM	FB_Cluster_4	ENSMUSG00000031902	Nfatc3	0.739435212	0.970231763	140	124	0.121	0.218	0.391859257	0.007577287	1	up	Nfatc3
Control-vs-T2DM	FB_Cluster_4	ENSMUSG00000027184	Caprin1	0.956790423	1.337901133	140	124	0.179	0.298	0.483653707	0.007693165	1	up	Caprin1
Control-vs-T2DM	FB_Cluster_4	ENSMUSG00000030697	Ppp4c	0.291937471	0.476421316	140	124	0.057	0.145	0.706387259	0.00781345	1	up	Ppp4c
Control-vs-T2DM	FB_Cluster_4	ENSMUSG00000024096	Ralbp1	0.842834678	1.630707333	140	124	0.157	0.315	0.952093608	0.008090695	1	up	Ralbp1
Control-vs-T2DM	FB_Cluster_4	ENSMUSG00000028967	Errfi1	3.319202385	7.529377314	140	124	0.343	0.492	1.181669655	0.008355313	1	up	Errfi1
Control-vs-T2DM	FB_Cluster_4	ENSMUSG00000030779	Rbbp6	1.184997263	1.639780945	140	124	0.2	0.331	0.468585611	0.008368149	1	up	Rbbp6
Control-vs-T2DM	FB_Cluster_4	ENSMUSG00000042807	Hecw2	0.684647234	1.447107347	140	124	0.093	0.226	1.079628199	0.008562448	1	up	Hecw2
Control-vs-T2DM	FB_Cluster_4	ENSMUSG00000045205	Dpy19l4	0.60640801	0.884630881	140	124	0.107	0.218	0.54471198	0.008617133	1	up	Dpy19l4
Control-vs-T2DM	FB_Cluster_4	ENSMUSG00000029228	Lnx1	0.37280553	0.519577225	140	124	0.064	0.137	0.478805643	0.009086961	1	up	Lnx1
Control-vs-T2DM	FB_Cluster_4	ENSMUSG00000022106	Rcbtb2	0.351086973	0.495276066	140	124	0.071	0.153	0.496284836	0.009122353	1	up	Rcbtb2
Control-vs-T2DM	FB_Cluster_4	ENSMUSG00000084925	1810062O18Rik	0.133541966	0.451324229	140	124	0.029	0.121	1.756110749	0.009271263	1	up	1810062O18Rik
Control-vs-T2DM	FB_Cluster_4	ENSMUSG00000056342	Usp34	2.883943827	3.993630769	140	124	0.421	0.597	0.469643991	0.009465824	1	up	Usp34
Control-vs-T2DM	FB_Cluster_4	ENSMUSG00000022000	Zc3h13	0.909837455	1.245001466	140	124	0.164	0.282	0.452424026	0.009630697	1	up	Zc3h13
Control-vs-T2DM	FB_Cluster_4	ENSMUSG00000007880	Arid1a	0.587616672	1.068512673	140	124	0.107	0.234	0.862546301	0.010067176	1	up	Arid1a
Control-vs-T2DM	FB_Cluster_4	ENSMUSG00000000759	Tubgcp3	0.196757473	0.442015631	140	124	0.029	0.105	1.167272261	0.01041367	1	up	Tubgcp3
Control-vs-T2DM	FB_Cluster_4	ENSMUSG00000021715	Cwc27	0.694944155	1.334122294	140	124	0.121	0.258	0.940822515	0.010581424	1	up	Cwc27
Control-vs-T2DM	FB_Cluster_4	ENSMUSG00000026134	Prim2	0.429801846	0.585276673	140	124	0.079	0.153	0.44535795	0.010689076	1	up	Prim2
Control-vs-T2DM	FB_Cluster_4	ENSMUSG00000038784	Cnot4	1.53758912	2.43353636	140	124	0.271	0.444	0.662349755	0.010931122	1	up	Cnot4
Control-vs-T2DM	FB_Cluster_4	ENSMUSG00000033769	Exoc6b	2.210425683	3.297192282	140	124	0.35	0.532	0.576892281	0.011133891	1	up	Exoc6b
Control-vs-T2DM	FB_Cluster_4	ENSMUSG00000037606	Osbpl5	0.264864574	0.658588588	140	124	0.05	0.153	1.313797075	0.011165515	1	up	Osbpl5
Control-vs-T2DM	FB_Cluster_4	ENSMUSG00000060261	Gtf2i	1.002036569	1.737850239	140	124	0.2	0.355	0.794307646	0.011373489	1	up	Gtf2i
Control-vs-T2DM	FB_Cluster_4	ENSMUSG00000029276	Glmn	0.425694572	0.572424472	140	124	0.071	0.145	0.427179802	0.011704712	1	up	Glmn
Control-vs-T2DM	FB_Cluster_4	ENSMUSG00000026426	Arl8a	0.381709897	0.608338247	140	124	0.071	0.161	0.672256344	0.011857763	1	up	Arl8a
Control-vs-T2DM	FB_Cluster_4	ENSMUSG00000014856	Tmem208	0.34565093	0.455892623	140	124	0.057	0.121	0.399277353	0.011914342	1	up	Tmem208
Control-vs-T2DM	FB_Cluster_4	ENSMUSG00000038535	Zfp280d	1.282225893	1.686181183	140	124	0.229	0.355	0.395082164	0.012367168	1	up	Zfp280d
Control-vs-T2DM	FB_Cluster_4	ENSMUSG00000028397	Kdm4c	0.84869538	1.54564929	140	124	0.164	0.315	0.864817635	0.012562696	1	up	Kdm4c
Control-vs-T2DM	FB_Cluster_4	ENSMUSG00000092416	Zfp141	0.257540182	0.484053075	140	124	0.036	0.113	0.910105643	0.012994424	1	up	Zfp141
Control-vs-T2DM	FB_Cluster_4	ENSMUSG00000067150	Xpo5	0.183852436	0.475477302	140	124	0.043	0.137	1.370347081	0.013040537	1	up	Xpo5
Control-vs-T2DM	FB_Cluster_4	ENSMUSG00000003033	Ap1m1	0.129797423	0.371506553	140	124	0.029	0.113	1.516403135	0.013094225	1	up	Ap1m1
Control-vs-T2DM	FB_Cluster_4	ENSMUSG00000001366	Fbxo9	0.276601175	0.423836659	140	124	0.043	0.113	0.615519956	0.013176527	1	up	Fbxo9
Control-vs-T2DM	FB_Cluster_4	ENSMUSG00000063450	Syne2	2.181696118	3.306304194	140	124	0.343	0.516	0.599746806	0.013280966	1	up	Syne2
Control-vs-T2DM	FB_Cluster_4	ENSMUSG00000026473	Glul	0.865112337	1.524431879	140	124	0.15	0.29	0.817240177	0.013344844	1	up	Glul
Control-vs-T2DM	FB_Cluster_4	ENSMUSG00000027957	Slc35a3	0.103322621	0.459981998	140	124	0.021	0.105	2.153339239	0.013818907	1	up	Slc35a3
Control-vs-T2DM	FB_Cluster_4	ENSMUSG00000027475	Kif3b	0.099336845	0.460377238	140	124	0.021	0.105	2.211277418	0.013845949	1	up	Kif3b
Control-vs-T2DM	FB_Cluster_4	ENSMUSG00000035284	Vps13c	0.826273563	1.613697468	140	124	0.157	0.306	0.965593524	0.014025102	1	up	Vps13c
Control-vs-T2DM	FB_Cluster_4	ENSMUSG00000079109	Pms2	0.098296855	0.435385248	140	124	0.021	0.105	2.145939737	0.014126999	1	up	Pms2
Control-vs-T2DM	FB_Cluster_4	ENSMUSG00000036862	Dchs1	0.077840181	0.401387293	140	124	0.021	0.105	2.36491515	0.014464231	1	up	Dchs1
Control-vs-T2DM	FB_Cluster_4	ENSMUSG00000024420	Zfp521	3.348712961	5.219637602	140	124	0.443	0.621	0.640327484	0.014538663	1	up	Zfp521
Control-vs-T2DM	FB_Cluster_4	ENSMUSG00000063382	Bcl9l	0.533814072	0.92367147	140	124	0.1	0.21	0.790928417	0.014642917	1	up	Bcl9l
Control-vs-T2DM	FB_Cluster_4	ENSMUSG00000039220	Ppp1r10	0.542017693	0.920914724	140	124	0.107	0.218	0.764618128	0.014816766	1	up	Ppp1r10
Control-vs-T2DM	FB_Cluster_4	ENSMUSG00000020576	Nbas	0.678856571	1.135114319	140	124	0.129	0.25	0.74157349	0.014885919	1	up	Nbas
Control-vs-T2DM	FB_Cluster_4	ENSMUSG00000098202	B830012L14Rik	0.190205459	0.48355189	140	124	0.036	0.121	1.345652089	0.014929611	1	up	B830012L14Rik
Control-vs-T2DM	FB_Cluster_4	ENSMUSG00000049047	Armcx3	0.261163445	0.577676837	140	124	0.05	0.145	1.145007083	0.014974324	1	up	Armcx3
Control-vs-T2DM	FB_Cluster_4	ENSMUSG00000033960	Jcad	0.391307465	0.521074184	140	124	0.071	0.145	0.413094351	0.015004282	1	up	Jcad
Control-vs-T2DM	FB_Cluster_4	ENSMUSG00000015850	Adamtsl4	0.359215115	0.81290796	140	124	0.079	0.194	1.178019852	0.015100784	1	up	Adamtsl4
Control-vs-T2DM	FB_Cluster_4	ENSMUSG00000029686	Cul1	1.201542383	1.558237213	140	124	0.221	0.347	0.374999852	0.015148545	1	up	Cul1
Control-vs-T2DM	FB_Cluster_4	ENSMUSG00000116564	Riok2	0.329588481	0.474863341	140	124	0.043	0.113	0.526712686	0.015149582	1	up	Riok2
Control-vs-T2DM	FB_Cluster_4	ENSMUSG00000041328	Pcf11	0.756026287	1.194421078	140	124	0.143	0.266	0.659733194	0.015776883	1	up	Pcf11
Control-vs-T2DM	FB_Cluster_4	ENSMUSG00000024283	Wac	2.378488062	3.117824482	140	124	0.393	0.548	0.390480547	0.015796828	1	up	Wac
Control-vs-T2DM	FB_Cluster_4	ENSMUSG00000117030	Gm49959	0.420343136	0.599869546	140	124	0.086	0.169	0.51297858	0.016087723	1	up	Gm49959
Control-vs-T2DM	FB_Cluster_4	ENSMUSG00000022292	Rrm2b	0.211726055	0.4303143	140	124	0.036	0.113	1.022845956	0.016278364	1	up	Rrm2b
Control-vs-T2DM	FB_Cluster_4	ENSMUSG00000023827	Agpat4	0.486958615	0.785383421	140	124	0.1	0.202	0.689485421	0.017652349	1	up	Agpat4
Control-vs-T2DM	FB_Cluster_4	ENSMUSG00000020982	Nemf	0.675960449	0.876807125	140	124	0.121	0.21	0.375271803	0.017907597	1	up	Nemf
Control-vs-T2DM	FB_Cluster_4	ENSMUSG00000034327	Kctd9	0.103798226	0.523143048	140	124	0.029	0.113	2.332310219	0.018140513	1	up	Kctd9
Control-vs-T2DM	FB_Cluster_4	ENSMUSG00000042099	Kank3	0.220085319	0.516012886	140	124	0.043	0.129	1.228968375	0.018216199	1	up	Kank3
Control-vs-T2DM	FB_Cluster_4	ENSMUSG00000039046	Usp6nl	0.226811238	0.532649642	140	124	0.043	0.129	1.231329656	0.018365085	1	up	Usp6nl
Control-vs-T2DM	FB_Cluster_4	ENSMUSG00000039210	Gpatch2	0.841548871	1.125686313	140	124	0.15	0.25	0.41964263	0.018673158	1	up	Gpatch2
Control-vs-T2DM	FB_Cluster_4	ENSMUSG00000026585	Kifap3	0.854075347	1.114148596	140	124	0.164	0.266	0.383466979	0.019620223	1	up	Kifap3
Control-vs-T2DM	FB_Cluster_4	ENSMUSG00000033722	BC034090	0.254418113	0.420943588	140	124	0.043	0.113	0.726201264	0.019848141	1	up	BC034090
Control-vs-T2DM	FB_Cluster_4	ENSMUSG00000009621	Vav2	0.208297691	0.398000956	140	124	0.036	0.105	0.933795046	0.019914741	1	up	Vav2
Control-vs-T2DM	FB_Cluster_4	ENSMUSG00000023048	Prr13	0.129361225	0.482368944	140	124	0.029	0.113	1.897916015	0.020108602	1	up	Prr13
Control-vs-T2DM	FB_Cluster_4	ENSMUSG00000032252	Glce	0.339872561	0.444988446	140	124	0.057	0.129	0.38867374	0.020119893	1	up	Glce
Control-vs-T2DM	FB_Cluster_4	ENSMUSG00000026024	Als2	0.172056101	0.612701481	140	124	0.029	0.113	1.83170247	0.020222171	1	up	Als2
Control-vs-T2DM	FB_Cluster_4	ENSMUSG00000029992	Gfpt1	0.738206391	1.294480936	140	124	0.129	0.258	0.810193611	0.02066923	1	up	Gfpt1
Control-vs-T2DM	FB_Cluster_4	ENSMUSG00000038070	Cntln	1.3097009	1.944769174	140	124	0.221	0.363	0.570325585	0.02070377	1	up	Cntln
Control-vs-T2DM	FB_Cluster_4	ENSMUSG00000069045	Ddx3y	0.527934735	0.984354994	140	124	0.114	0.234	0.898692417	0.020737855	1	up	Ddx3y
Control-vs-T2DM	FB_Cluster_4	ENSMUSG00000031590	Frg1	0.337247025	0.788189988	140	124	0.064	0.169	1.22449301	0.020945676	1	up	Frg1
Control-vs-T2DM	FB_Cluster_4	ENSMUSG00000031930	Wwp2	0.121676207	0.490626382	140	124	0.029	0.113	2.01068655	0.021801194	1	up	Wwp2
Control-vs-T2DM	FB_Cluster_4	ENSMUSG00000063550	Nup98	0.799036299	1.546750258	140	124	0.164	0.306	0.952820052	0.021917297	1	up	Nup98
Control-vs-T2DM	FB_Cluster_4	ENSMUSG00000039115	Itga9	1.466993373	2.071057202	140	124	0.264	0.403	0.497476364	0.022762246	1	up	Itga9
Control-vs-T2DM	FB_Cluster_4	ENSMUSG00000033628	Pik3c3	0.221016363	0.592009536	140	124	0.036	0.121	1.421058295	0.022835558	1	up	Pik3c3
Control-vs-T2DM	FB_Cluster_4	ENSMUSG00000074158	Zfp976	0.239408106	0.470624185	140	124	0.043	0.121	0.974807492	0.022865886	1	up	Zfp976
Control-vs-T2DM	FB_Cluster_4	ENSMUSG00000034744	Nagk	0.3708082	0.488253287	140	124	0.071	0.137	0.396863044	0.022907521	1	up	Nagk
Control-vs-T2DM	FB_Cluster_4	ENSMUSG00000016409	Nkap	0.291689718	0.461931024	140	124	0.05	0.121	0.663060681	0.023061258	1	up	Nkap
Control-vs-T2DM	FB_Cluster_4	ENSMUSG00000049550	Clip1	1.200520429	1.599710734	140	124	0.221	0.339	0.414121116	0.023283546	1	up	Clip1
Control-vs-T2DM	FB_Cluster_4	ENSMUSG00000052040	Klf13	1.147934451	1.671152027	140	124	0.221	0.355	0.541763374	0.02368912	1	up	Klf13
Control-vs-T2DM	FB_Cluster_4	ENSMUSG00000030655	Smg1	1.877193719	2.411661625	140	124	0.329	0.468	0.36143293	0.024066838	1	up	Smg1
Control-vs-T2DM	FB_Cluster_4	ENSMUSG00000032050	Rdx	1.484322477	2.246720383	140	124	0.25	0.395	0.597983045	0.024483267	1	up	Rdx
Control-vs-T2DM	FB_Cluster_4	ENSMUSG00000037957	Wdr20	0.237691935	0.615021843	140	124	0.05	0.145	1.371172422	0.024564012	1	up	Wdr20
Control-vs-T2DM	FB_Cluster_4	ENSMUSG00000029780	Nt5c3	0.432999212	0.600446986	140	124	0.086	0.161	0.471579579	0.024911978	1	up	Nt5c3
Control-vs-T2DM	FB_Cluster_4	ENSMUSG00000041477	Dcp1b	0.213979136	0.390801811	140	124	0.043	0.113	0.868662067	0.024973006	1	up	Dcp1b
Control-vs-T2DM	FB_Cluster_4	ENSMUSG00000038122	Tbc1d32	0.270544703	0.748268251	140	124	0.05	0.145	1.467348202	0.025760329	1	up	Tbc1d32
Control-vs-T2DM	FB_Cluster_4	ENSMUSG00000029234	Tmem165	0.709563308	1.357833075	140	124	0.136	0.266	0.936205757	0.026078001	1	up	Tmem165
Control-vs-T2DM	FB_Cluster_4	ENSMUSG00000042198	Chchd7	0.428080625	0.574906463	140	124	0.064	0.137	0.425358654	0.026525812	1	up	Chchd7
Control-vs-T2DM	FB_Cluster_4	ENSMUSG00000001870	Ltbp1	3.426608797	4.634699963	140	124	0.45	0.613	0.435683478	0.026594027	1	up	Ltbp1
Control-vs-T2DM	FB_Cluster_4	ENSMUSG00000045039	Megf8	0.313293451	0.503685607	140	124	0.057	0.129	0.684834876	0.026745974	1	up	Megf8
Control-vs-T2DM	FB_Cluster_4	ENSMUSG00000024571	Gm16286	0.397302831	0.810306649	140	124	0.086	0.194	1.028043861	0.02691329	1	up	Gm16286
Control-vs-T2DM	FB_Cluster_4	ENSMUSG00000042284	Itga1	0.138195113	0.40014585	140	124	0.029	0.105	1.533136269	0.02704019	1	up	Itga1
Control-vs-T2DM	FB_Cluster_4	ENSMUSG00000034152	Exoc3	0.652227028	0.930199375	140	124	0.114	0.202	0.512099654	0.02732042	1	up	Exoc3
Control-vs-T2DM	FB_Cluster_4	ENSMUSG00000053644	Aldh7a1	0.209720899	0.538748272	140	124	0.043	0.129	1.360720711	0.027416909	1	up	Aldh7a1
Control-vs-T2DM	FB_Cluster_4	ENSMUSG00000037236	Matr3	0.750324418	1.068463639	140	124	0.15	0.258	0.509894153	0.02743627	1	up	Matr3
Control-vs-T2DM	FB_Cluster_4	ENSMUSG00000030718	Ppme1	0.351527868	0.773972522	140	124	0.064	0.161	1.138419321	0.028059848	1	up	Ppme1
Control-vs-T2DM	FB_Cluster_4	ENSMUSG00000021870	Slmap	1.230347742	1.679533863	140	124	0.236	0.355	0.448963393	0.028683613	1	up	Slmap
Control-vs-T2DM	FB_Cluster_4	ENSMUSG00000022023	Wbp4	0.236433371	0.700797151	140	124	0.05	0.145	1.567159023	0.028881574	1	up	Wbp4
Control-vs-T2DM	FB_Cluster_4	ENSMUSG00000033909	Usp36	0.245624162	0.394007293	140	124	0.05	0.121	0.681548724	0.02900161	1	up	Usp36
Control-vs-T2DM	FB_Cluster_4	ENSMUSG00000028057	Rit1	0.160672478	0.524946777	140	124	0.036	0.121	1.707425501	0.029037667	1	up	Rit1
Control-vs-T2DM	FB_Cluster_4	ENSMUSG00000027282	Mtch2	0.691792282	1.119498111	140	124	0.121	0.226	0.694361604	0.029146086	1	up	Mtch2
Control-vs-T2DM	FB_Cluster_4	ENSMUSG00000003233	Dvl3	0.250730733	0.384989761	140	124	0.05	0.113	0.618480642	0.030537306	1	up	Dvl3
Control-vs-T2DM	FB_Cluster_4	ENSMUSG00000021629	Slc30a5	0.430878966	1.029755369	140	124	0.079	0.185	1.256752377	0.031018096	1	up	Slc30a5
Control-vs-T2DM	FB_Cluster_4	ENSMUSG00000054580	Pla2r1	0.881583901	1.272093476	140	124	0.15	0.266	0.52898467	0.031041102	1	up	Pla2r1
Control-vs-T2DM	FB_Cluster_4	ENSMUSG00000043323	Fbrsl1	0.364394043	0.718366796	140	124	0.079	0.177	0.979026249	0.031281923	1	up	Fbrsl1
Control-vs-T2DM	FB_Cluster_4	ENSMUSG00000021003	Galc	0.127253994	0.393934259	140	124	0.029	0.105	1.629476863	0.031318477	1	up	Galc
Control-vs-T2DM	FB_Cluster_4	ENSMUSG00000040459	Arglu1	1.447883976	2.201546798	140	124	0.25	0.395	0.604537404	0.031544349	1	up	Arglu1
Control-vs-T2DM	FB_Cluster_4	ENSMUSG00000060771	Tsga10	0.343139622	0.653415814	140	124	0.057	0.145	0.929006048	0.031905978	1	up	Tsga10
Control-vs-T2DM	FB_Cluster_4	ENSMUSG00000031060	Rbm10	0.256888717	0.658548007	140	124	0.057	0.153	1.357802649	0.031940643	1	up	Rbm10
Control-vs-T2DM	FB_Cluster_4	ENSMUSG00000026187	Xrcc5	0.187775406	0.302026087	140	124	0.043	0.105	0.685374538	0.032086395	1	up	Xrcc5
Control-vs-T2DM	FB_Cluster_4	ENSMUSG00000071637	Cebpd	1.359851148	1.839587944	140	124	0.229	0.355	0.435906243	0.032774371	1	up	Cebpd
Control-vs-T2DM	FB_Cluster_4	ENSMUSG00000025812	Pard3	2.716597776	3.691434953	140	124	0.379	0.532	0.44236674	0.032976681	1	up	Pard3
Control-vs-T2DM	FB_Cluster_4	ENSMUSG00000015944	Castor2	0.299628494	0.470115264	140	124	0.043	0.113	0.649665132	0.033333503	1	up	Castor2
Control-vs-T2DM	FB_Cluster_4	ENSMUSG00000022307	Oxr1	0.823903941	1.146308997	140	124	0.121	0.226	0.476398694	0.033458746	1	up	Oxr1
Control-vs-T2DM	FB_Cluster_4	ENSMUSG00000053799	Exoc6	0.165779279	0.54180922	140	124	0.029	0.105	1.707917512	0.03346944	1	up	Exoc6
Control-vs-T2DM	FB_Cluster_4	ENSMUSG00000016194	Hsd11b1	0.818951053	1.43692317	140	124	0.136	0.258	0.811058038	0.033831848	1	up	Hsd11b1
Control-vs-T2DM	FB_Cluster_4	ENSMUSG00000028514	Usp24	1.455407694	2.03323243	140	124	0.257	0.387	0.482323636	0.034154634	1	up	Usp24
Control-vs-T2DM	FB_Cluster_4	ENSMUSG00000034158	Lrrc58	0.802439231	1.376284864	140	124	0.157	0.282	0.778240109	0.034171826	1	up	Lrrc58
Control-vs-T2DM	FB_Cluster_4	ENSMUSG00000028447	Dctn3	0.298025179	0.488105772	140	124	0.05	0.121	0.711571124	0.034320022	1	up	Dctn3
Control-vs-T2DM	FB_Cluster_4	ENSMUSG00000046982	Tshz1	0.762290882	1.513624356	140	124	0.136	0.258	0.989499749	0.034545312	1	up	Tshz1
Control-vs-T2DM	FB_Cluster_4	ENSMUSG00000020385	Clk4	0.656067796	1.191434717	140	124	0.121	0.234	0.860684293	0.034615085	1	up	Clk4
Control-vs-T2DM	FB_Cluster_4	ENSMUSG00000021254	Gpatch2l	0.257151114	0.56076923	140	124	0.057	0.145	1.124487113	0.034634725	1	up	Gpatch2l
Control-vs-T2DM	FB_Cluster_4	ENSMUSG00000016181	Utp25	0.117002565	0.406181462	140	124	0.029	0.105	1.794706862	0.035023672	1	up	Utp25
Control-vs-T2DM	FB_Cluster_4	ENSMUSG00000079037	Prnp	0.482962486	0.62093798	140	124	0.1	0.169	0.36247168	0.035281445	1	up	Prnp
Control-vs-T2DM	FB_Cluster_4	ENSMUSG00000002731	Prkra	0.119337765	0.401925809	140	124	0.029	0.105	1.75102905	0.035428482	1	up	Prkra
Control-vs-T2DM	FB_Cluster_4	ENSMUSG00000002455	Prpf6	0.595943093	0.987822887	140	124	0.114	0.218	0.728981796	0.035524334	1	up	Prpf6
Control-vs-T2DM	FB_Cluster_4	ENSMUSG00000017412	Cacnb4	0.173880842	0.608334921	140	124	0.029	0.105	1.806174506	0.035560484	1	up	Cacnb4
Control-vs-T2DM	FB_Cluster_4	ENSMUSG00000030824	Nucb1	0.613639405	1.056208426	140	124	0.121	0.234	0.783333023	0.03572332	1	up	Nucb1
Control-vs-T2DM	FB_Cluster_4	ENSMUSG00000032599	Ip6k2	0.208854738	0.42869368	140	124	0.036	0.105	1.037093169	0.03691746	1	up	Ip6k2
Control-vs-T2DM	FB_Cluster_4	ENSMUSG00000025404	R3hdm2	1.333037649	1.883914518	140	124	0.257	0.387	0.498984333	0.037096553	1	up	R3hdm2
Control-vs-T2DM	FB_Cluster_4	ENSMUSG00000040339	Fam102b	0.804372093	1.310131006	140	124	0.15	0.266	0.703706915	0.037097495	1	up	Fam102b
Control-vs-T2DM	FB_Cluster_4	ENSMUSG00000053205	Styx	0.465068664	0.611012925	140	124	0.093	0.161	0.393685081	0.03769479	1	up	Styx
Control-vs-T2DM	FB_Cluster_4	ENSMUSG00000022329	Stk3	2.082449467	2.998890916	140	124	0.336	0.484	0.526126388	0.038039619	1	up	Stk3
Control-vs-T2DM	FB_Cluster_4	ENSMUSG00000036026	Tmem63b	0.408052391	0.620134926	140	124	0.079	0.153	0.603706859	0.038154556	1	up	Tmem63b
Control-vs-T2DM	FB_Cluster_4	ENSMUSG00000060098	Prmt7	0.265763035	0.437642254	140	124	0.043	0.105	0.719398449	0.038321066	1	up	Prmt7
Control-vs-T2DM	FB_Cluster_4	ENSMUSG00000053253	Ndfip2	0.481484773	0.912448847	140	124	0.093	0.194	0.92211201	0.039004034	1	up	Ndfip2
Control-vs-T2DM	FB_Cluster_4	ENSMUSG00000026799	Med27	0.259283774	0.417758333	140	124	0.043	0.113	0.687925674	0.039267671	1	up	Med27
Control-vs-T2DM	FB_Cluster_4	ENSMUSG00000032402	Smad3	0.930415573	1.431621809	140	124	0.157	0.274	0.621648996	0.039933247	1	up	Smad3
Control-vs-T2DM	FB_Cluster_4	ENSMUSG00000055835	Zfp1	0.292874199	0.455043746	140	124	0.043	0.113	0.635548641	0.040110149	1	up	Zfp1
Control-vs-T2DM	FB_Cluster_4	ENSMUSG00000019843	Fyn	1.427603527	2.3100511	140	124	0.271	0.419	0.694290793	0.040227508	1	up	Fyn
Control-vs-T2DM	FB_Cluster_4	ENSMUSG00000032468	Armc8	0.488945429	1.001759844	140	124	0.1	0.21	1.034640303	0.040253903	1	up	Armc8
Control-vs-T2DM	FB_Cluster_4	ENSMUSG00000037013	Ss18	0.371651733	0.813798907	140	124	0.093	0.202	1.130510144	0.040716041	1	up	Ss18
Control-vs-T2DM	FB_Cluster_4	ENSMUSG00000035441	Myo1d	0.975340226	1.478470746	140	124	0.15	0.258	0.600077901	0.040914751	1	up	Myo1d
Control-vs-T2DM	FB_Cluster_4	ENSMUSG00000049106	Dcaf5	0.61982783	0.840361011	140	124	0.121	0.202	0.439080624	0.040965269	1	up	Dcaf5
Control-vs-T2DM	FB_Cluster_4	ENSMUSG00000063410	Stk24	0.764966131	1.103525217	140	124	0.15	0.25	0.528593964	0.04187573	1	up	Stk24
Control-vs-T2DM	FB_Cluster_4	ENSMUSG00000033228	Scaf11	1.24662101	1.610743705	140	124	0.214	0.331	0.369677865	0.04193941	1	up	Scaf11
Control-vs-T2DM	FB_Cluster_4	ENSMUSG00000039968	Rsbn1l	1.109175525	1.69262766	140	124	0.2	0.323	0.60973213	0.041960703	1	up	Rsbn1l
Control-vs-T2DM	FB_Cluster_4	ENSMUSG00000048285	Frmd6	1.996919902	3.230287697	140	124	0.314	0.46	0.693858611	0.04214929	1	up	Frmd6
Control-vs-T2DM	FB_Cluster_4	ENSMUSG00000035696	Rnf38	0.633659182	1.005672586	140	124	0.107	0.21	0.666297488	0.042289878	1	up	Rnf38
Control-vs-T2DM	FB_Cluster_4	ENSMUSG00000060675	Plaat3	0.229147675	0.59202247	140	124	0.05	0.137	1.368988502	0.042453535	1	up	Plaat3
Control-vs-T2DM	FB_Cluster_4	ENSMUSG00000001630	Stk38l	0.311002489	0.495708835	140	124	0.064	0.137	0.672394042	0.043117932	1	up	Stk38l
Control-vs-T2DM	FB_Cluster_4	ENSMUSG00000030509	Asb7	0.280414894	0.367225734	140	124	0.05	0.113	0.388982597	0.043131588	1	up	Asb7
Control-vs-T2DM	FB_Cluster_4	ENSMUSG00000014592	Camta1	0.830981551	1.131304736	140	124	0.157	0.25	0.445053161	0.043315419	1	up	Camta1
Control-vs-T2DM	FB_Cluster_4	ENSMUSG00000063236	1110038F14Rik	0.216146031	0.595179621	140	124	0.05	0.137	1.460893848	0.043571247	1	up	1110038F14Rik
Control-vs-T2DM	FB_Cluster_4	ENSMUSG00000054814	Usp46	0.645767143	1.040049545	140	124	0.114	0.218	0.68748163	0.044284051	1	up	Usp46
Control-vs-T2DM	FB_Cluster_4	ENSMUSG00000000441	Raf1	0.533171164	0.96472845	140	124	0.107	0.21	0.855403131	0.04447235	1	up	Raf1
Control-vs-T2DM	FB_Cluster_4	ENSMUSG00000090086	AI480526	0.199640884	0.484785639	140	124	0.043	0.121	1.279514866	0.045218882	1	up	AI480526
Control-vs-T2DM	FB_Cluster_4	ENSMUSG00000027860	Vangl1	0.236946236	0.646933968	140	124	0.05	0.137	1.448672971	0.04609917	1	up	Vangl1
Control-vs-T2DM	FB_Cluster_4	ENSMUSG00000117743	Gm50232	0.202470996	0.494752973	140	124	0.043	0.121	1.288572325	0.046706634	1	up	Gm50232
Control-vs-T2DM	FB_Cluster_4	ENSMUSG00000021219	Rgs6	0.844024149	2.562877288	140	124	0.121	0.21	1.602293592	0.047482517	1	up	Rgs6
Control-vs-T2DM	FB_Cluster_4	ENSMUSG00000028309	Rnf20	0.422528317	0.557735289	140	124	0.071	0.137	0.400449767	0.047676886	1	up	Rnf20
Control-vs-T2DM	FB_Cluster_4	ENSMUSG00000057894	Zfp329	0.42262158	0.674630261	140	124	0.079	0.161	0.674603102	0.048256315	1	up	Zfp329
Control-vs-T2DM	FB_Cluster_4	ENSMUSG00000026927	Entr1	0.401946529	0.605373762	140	124	0.079	0.153	0.590701968	0.048272959	1	up	Entr1
Control-vs-T2DM	FB_Cluster_4	ENSMUSG00000024290	Rock1	2.923443437	3.879858937	140	124	0.45	0.597	0.408323358	0.048342662	1	up	Rock1
Control-vs-T2DM	FB_Cluster_4	ENSMUSG00000005078	Jkamp	0.216548929	0.406981758	140	124	0.05	0.121	0.909959466	0.048865725	1	up	Jkamp
Control-vs-T2DM	FB_Cluster_4	ENSMUSG00000036323	Srp72	0.395415281	0.763764884	140	124	0.086	0.185	0.949584035	0.048896159	1	up	Srp72
Control-vs-T2DM	FB_Cluster_4	ENSMUSG00000040855	Reps2	0.930157534	1.917292427	140	124	0.164	0.29	1.043443565	0.048959502	1	up	Reps2
Control-vs-T2DM	FB_Cluster_4	ENSMUSG00000043991	Pura	1.448120801	1.878993652	140	124	0.25	0.363	0.375755393	0.049003833	1	up	Pura
Control-vs-T2DM	FB_Cluster_4	ENSMUSG00000027263	Tubgcp4	0.268308197	0.533846408	140	124	0.057	0.137	0.992266216	0.049255473	1	up	Tubgcp4
Control-vs-T2DM	FB_Cluster_4	ENSMUSG00000074577	Ripor3	0.157193262	0.568417601	140	124	0.036	0.113	1.853748148	0.04945657	1	up	Ripor3
Control-vs-T2DM	FB_Cluster_5	ENSMUSG00000047409	Ctdspl	0.554141459	1.249706054	134	118	0.119	0.356	1.173117694	9.89E-06	0.30133025	up	Ctdspl
Control-vs-T2DM	FB_Cluster_5	ENSMUSG00000005881	Ergic3	0.760900319	1.074877863	134	118	0.134	0.314	0.498337986	1.52E-05	0.464229537	up	Ergic3
Control-vs-T2DM	FB_Cluster_5	ENSMUSG00000024817	Uhrf2	0.988549368	1.35287872	134	118	0.172	0.364	0.452608295	9.38E-05	1	up	Uhrf2
Control-vs-T2DM	FB_Cluster_5	ENSMUSG00000034487	Poglut3	0.564752633	1.173957739	134	118	0.134	0.339	1.055556931	9.90E-05	1	up	Poglut3
Control-vs-T2DM	FB_Cluster_5	ENSMUSG00000030447	Cyfip1	0.853799564	1.557628274	134	118	0.157	0.364	0.867305301	0.000103124	1	up	Cyfip1
Control-vs-T2DM	FB_Cluster_5	ENSMUSG00000024603	Dctn4	0.953550749	1.27725917	134	118	0.194	0.364	0.421631326	0.000103447	1	up	Dctn4
Control-vs-T2DM	FB_Cluster_5	ENSMUSG00000030352	Tspan9	0.652886524	1.048610238	134	118	0.142	0.314	0.683490988	0.000137702	1	up	Tspan9
Control-vs-T2DM	FB_Cluster_5	ENSMUSG00000021929	Kpna3	0.371902996	0.773495583	134	118	0.067	0.229	1.056265318	0.000144774	1	up	Kpna3
Control-vs-T2DM	FB_Cluster_5	ENSMUSG00000029310	Nudt9	0.228279045	0.47939059	134	118	0.052	0.178	1.070072224	0.000234225	1	up	Nudt9
Control-vs-T2DM	FB_Cluster_5	ENSMUSG00000043943	Naalad2	2.470302653	3.738363489	134	118	0.403	0.653	0.597699236	0.000241152	1	up	Naalad2
Control-vs-T2DM	FB_Cluster_5	ENSMUSG00000032243	Itga11	0.592010278	1.212112878	134	118	0.142	0.339	1.033705272	0.000319336	1	up	Itga11
Control-vs-T2DM	FB_Cluster_5	ENSMUSG00000012429	Mplkip	0.246378507	0.354234398	134	118	0.052	0.144	0.523649677	0.00032028	1	up	Mplkip
Control-vs-T2DM	FB_Cluster_5	ENSMUSG00000037370	Enpp1	0.711806601	1.482061522	134	118	0.157	0.364	1.057942794	0.000330242	1	up	Enpp1
Control-vs-T2DM	FB_Cluster_5	ENSMUSG00000022817	Itgb5	3.14222982	4.948434454	134	118	0.485	0.729	0.655166709	0.000367689	1	up	Itgb5
Control-vs-T2DM	FB_Cluster_5	ENSMUSG00000030465	Psd3	4.624176055	6.198052943	134	118	0.597	0.822	0.42261083	0.000368013	1	up	Psd3
Control-vs-T2DM	FB_Cluster_5	ENSMUSG00000026082	Rev1	1.042428595	1.442019216	134	118	0.172	0.331	0.468103478	0.000502605	1	up	Rev1
Control-vs-T2DM	FB_Cluster_5	ENSMUSG00000042557	Sin3a	0.253937978	0.718143674	134	118	0.06	0.212	1.499429188	0.000585903	1	up	Sin3a
Control-vs-T2DM	FB_Cluster_5	ENSMUSG00000003345	Csnk1g2	0.325839174	0.510311347	134	118	0.067	0.178	0.647057643	0.000588868	1	up	Csnk1g2
Control-vs-T2DM	FB_Cluster_5	ENSMUSG00000060572	Mfap2	0.445434478	0.919883737	134	118	0.09	0.246	1.046071279	0.000596734	1	up	Mfap2
Control-vs-T2DM	FB_Cluster_5	ENSMUSG00000090150	Acad11	0.178482255	0.523470141	134	118	0.037	0.161	1.551794095	0.000624304	1	up	Acad11
Control-vs-T2DM	FB_Cluster_5	ENSMUSG00000034653	Ythdc2	0.343615115	0.621662941	134	118	0.052	0.161	0.855151334	0.000636733	1	up	Ythdc2
Control-vs-T2DM	FB_Cluster_5	ENSMUSG00000035305	Ror1	1.957545004	3.154978207	134	118	0.306	0.542	0.688556594	0.000648971	1	up	Ror1
Control-vs-T2DM	FB_Cluster_5	ENSMUSG00000020716	Nf1	1.331626813	2.479488247	134	118	0.261	0.492	0.896802409	0.000736919	1	up	Nf1
Control-vs-T2DM	FB_Cluster_5	ENSMUSG00000086290	Snhg12	0.02395726	0.333366084	134	118	0.007	0.11	3.792995781	0.000751566	1	up	Snhg12
Control-vs-T2DM	FB_Cluster_5	ENSMUSG00000042650	Alkbh5	0.439053647	0.827945487	134	118	0.104	0.263	0.914984237	0.0007522	1	up	Alkbh5
Control-vs-T2DM	FB_Cluster_5	ENSMUSG00000028894	Inpp5b	0.158341929	0.573488631	134	118	0.037	0.169	1.856062261	0.000851287	1	up	Inpp5b
Control-vs-T2DM	FB_Cluster_5	ENSMUSG00000041936	Agrn	0.200253599	0.53676869	134	118	0.037	0.161	1.422020844	0.000967891	1	up	Agrn
Control-vs-T2DM	FB_Cluster_5	ENSMUSG00000024070	Prkd3	0.567606574	0.861331406	134	118	0.119	0.254	0.601590474	0.000971661	1	up	Prkd3
Control-vs-T2DM	FB_Cluster_5	ENSMUSG00000069565	Dazap1	0.180719063	0.84183451	134	118	0.052	0.203	2.219161235	0.000984889	1	up	Dazap1
Control-vs-T2DM	FB_Cluster_5	ENSMUSG00000024909	Efemp2	0.599836623	1.150568274	134	118	0.142	0.322	0.939589971	0.001006619	1	up	Efemp2
Control-vs-T2DM	FB_Cluster_5	ENSMUSG00000024143	Rhoq	1.646489207	2.144636554	134	118	0.291	0.475	0.381319772	0.001044412	1	up	Rhoq
Control-vs-T2DM	FB_Cluster_5	ENSMUSG00000040661	Rad54l2	0.231804673	0.48306708	134	118	0.045	0.153	1.05899027	0.001203956	1	up	Rad54l2
Control-vs-T2DM	FB_Cluster_5	ENSMUSG00000023272	Creld2	0.232829735	0.824109054	134	118	0.06	0.212	1.82311549	0.001266087	1	up	Creld2
Control-vs-T2DM	FB_Cluster_5	ENSMUSG00000041997	Tlk1	0.990597951	1.318026719	134	118	0.216	0.364	0.411971899	0.001269774	1	up	Tlk1
Control-vs-T2DM	FB_Cluster_5	ENSMUSG00000026466	Tor1aip1	1.514337496	1.952078157	134	118	0.284	0.441	0.366302684	0.001280965	1	up	Tor1aip1
Control-vs-T2DM	FB_Cluster_5	ENSMUSG00000034659	Tmem109	0.549406328	0.855866124	134	118	0.119	0.254	0.639417606	0.001348442	1	up	Tmem109
Control-vs-T2DM	FB_Cluster_5	ENSMUSG00000042572	Ube2q1	0.139235588	0.598463122	134	118	0.037	0.169	2.102939608	0.001425204	1	up	Ube2q1
Control-vs-T2DM	FB_Cluster_5	ENSMUSG00000003200	Sh3gl1	0.544358278	1.052726467	134	118	0.134	0.305	0.951374258	0.001440514	1	up	Sh3gl1
Control-vs-T2DM	FB_Cluster_5	ENSMUSG00000002679	Med6	0.067344469	0.424116485	134	118	0.015	0.119	2.653028645	0.001695595	1	up	Med6
Control-vs-T2DM	FB_Cluster_5	ENSMUSG00000004098	Col5a3	2.060665344	2.709556788	134	118	0.321	0.508	0.394929891	0.001728808	1	up	Col5a3
Control-vs-T2DM	FB_Cluster_5	ENSMUSG00000105552	Gm19710	0.599201227	1.272206561	134	118	0.142	0.322	1.086093096	0.001829778	1	up	Gm19710
Control-vs-T2DM	FB_Cluster_5	ENSMUSG00000000278	Scpep1	0.495575823	0.924151461	134	118	0.104	0.254	0.898888529	0.001850096	1	up	Scpep1
Control-vs-T2DM	FB_Cluster_5	ENSMUSG00000040997	Abhd4	0.060737528	0.446803792	134	118	0.015	0.119	2.876930848	0.001895019	1	up	Abhd4
Control-vs-T2DM	FB_Cluster_5	ENSMUSG00000042396	Rbm7	0.310721875	0.497766487	134	118	0.067	0.169	0.679670866	0.001928933	1	up	Rbm7
Control-vs-T2DM	FB_Cluster_5	ENSMUSG00000036748	Cuedc2	0.0857659	0.551726064	134	118	0.022	0.136	2.684056383	0.002022743	1	up	Cuedc2
Control-vs-T2DM	FB_Cluster_5	ENSMUSG00000030189	Ybx3	0.769388523	1.629242136	134	118	0.172	0.364	1.082317864	0.002187343	1	up	Ybx3
Control-vs-T2DM	FB_Cluster_5	ENSMUSG00000017376	Nlk	0.638780521	0.927258344	134	118	0.119	0.254	0.53758077	0.002286363	1	up	Nlk
Control-vs-T2DM	FB_Cluster_5	ENSMUSG00000029781	Fkbp9	1.284675441	1.833386506	134	118	0.284	0.458	0.513073428	0.002307873	1	up	Fkbp9
Control-vs-T2DM	FB_Cluster_5	ENSMUSG00000001017	Chtop	0.183859176	0.477409038	134	118	0.045	0.161	1.376142401	0.002327056	1	up	Chtop
Control-vs-T2DM	FB_Cluster_5	ENSMUSG00000024350	Dnajc18	0.110902218	0.447344793	134	118	0.03	0.144	2.01112119	0.002772847	1	up	Dnajc18
Control-vs-T2DM	FB_Cluster_5	ENSMUSG00000037400	Atp11b	0.578741962	0.760199416	134	118	0.112	0.22	0.393398173	0.00287596	1	up	Atp11b
Control-vs-T2DM	FB_Cluster_5	ENSMUSG00000020311	Erlec1	0.948244617	1.63524296	134	118	0.201	0.381	0.786109909	0.003152027	1	up	Erlec1
Control-vs-T2DM	FB_Cluster_5	ENSMUSG00000027878	Notch2	1.099664859	1.61241999	134	118	0.239	0.407	0.552121952	0.0033595	1	up	Notch2
Control-vs-T2DM	FB_Cluster_5	ENSMUSG00000066568	Lsm14a	0.439196353	0.659488965	134	118	0.097	0.203	0.58637274	0.003420244	1	up	Lsm14a
Control-vs-T2DM	FB_Cluster_5	ENSMUSG00000000326	Comt	1.156390536	1.715972464	134	118	0.231	0.407	0.569357015	0.003535469	1	up	Comt
Control-vs-T2DM	FB_Cluster_5	ENSMUSG00000036632	Alg5	0.335545151	0.661579176	134	118	0.09	0.22	0.979195075	0.003537571	1	up	Alg5
Control-vs-T2DM	FB_Cluster_5	ENSMUSG00000030681	Mvp	0.179241556	0.446508789	134	118	0.045	0.153	1.316301823	0.003724108	1	up	Mvp
Control-vs-T2DM	FB_Cluster_5	ENSMUSG00000021583	Erap1	0.411380014	0.6390143	134	118	0.09	0.203	0.635251608	0.003730762	1	up	Erap1
Control-vs-T2DM	FB_Cluster_5	ENSMUSG00000066705	Fxyd6	0.92853902	1.269780866	134	118	0.179	0.314	0.45150335	0.003882159	1	up	Fxyd6
Control-vs-T2DM	FB_Cluster_5	ENSMUSG00000118134	4930549G23Rik	0.099413005	0.342271699	134	118	0.022	0.119	1.782606462	0.003964592	1	up	4930549G23Rik
Control-vs-T2DM	FB_Cluster_5	ENSMUSG00000030126	Tmcc1	1.720884076	2.853966157	134	118	0.343	0.551	0.729785028	0.003992846	1	up	Tmcc1
Control-vs-T2DM	FB_Cluster_5	ENSMUSG00000023072	Cep89	0.102675629	0.37332187	134	118	0.022	0.119	1.861308218	0.004012152	1	up	Cep89
Control-vs-T2DM	FB_Cluster_5	ENSMUSG00000036943	Rab8b	0.787176269	1.310141462	134	118	0.172	0.331	0.734890812	0.00416959	1	up	Rab8b
Control-vs-T2DM	FB_Cluster_5	ENSMUSG00000022309	Angpt1	1.22533935	2.000831887	134	118	0.201	0.381	0.707372975	0.004218076	1	up	Angpt1
Control-vs-T2DM	FB_Cluster_5	ENSMUSG00000018171	Vmp1	0.952976754	1.307917331	134	118	0.209	0.356	0.456717348	0.004525264	1	up	Vmp1
Control-vs-T2DM	FB_Cluster_5	ENSMUSG00000026201	Stk16	0.244444449	0.3552849	134	118	0.052	0.127	0.539285666	0.005083352	1	up	Stk16
Control-vs-T2DM	FB_Cluster_5	ENSMUSG00000006205	Htra1	0.685686283	1.37142883	134	118	0.134	0.297	0.999953996	0.005189427	1	up	Htra1
Control-vs-T2DM	FB_Cluster_5	ENSMUSG00000046707	Csnk2a2	0.491062489	0.767527677	134	118	0.097	0.212	0.644206347	0.0052183	1	up	Csnk2a2
Control-vs-T2DM	FB_Cluster_5	ENSMUSG00000029385	Ccng2	0.13956446	0.592036446	134	118	0.037	0.153	2.083964705	0.005374092	1	up	Ccng2
Control-vs-T2DM	FB_Cluster_5	ENSMUSG00000018427	Ypel2	0.160719755	0.487291295	134	118	0.037	0.144	1.599635843	0.005383046	1	up	Ypel2
Control-vs-T2DM	FB_Cluster_5	ENSMUSG00000027692	Tnik	0.744021099	1.175765961	134	118	0.157	0.297	0.660114283	0.005663957	1	up	Tnik
Control-vs-T2DM	FB_Cluster_5	ENSMUSG00000028681	Ptch2	0.120455818	0.378419397	134	118	0.022	0.11	1.650665951	0.00579165	1	up	Ptch2
Control-vs-T2DM	FB_Cluster_5	ENSMUSG00000032816	Igdcc4	0.285352019	0.378575222	134	118	0.052	0.127	0.40771276	0.00582275	1	up	Igdcc4
Control-vs-T2DM	FB_Cluster_5	ENSMUSG00000030660	Pik3c2a	0.557902009	1.007135124	134	118	0.134	0.28	0.852058277	0.005901321	1	up	Pik3c2a
Control-vs-T2DM	FB_Cluster_5	ENSMUSG00000024234	Mtpap	0.306437118	0.411641156	134	118	0.067	0.144	0.425675882	0.005912208	1	up	Mtpap
Control-vs-T2DM	FB_Cluster_5	ENSMUSG00000028719	Cmpk1	0.421622405	0.687180098	134	118	0.075	0.186	0.704604512	0.006332114	1	up	Cmpk1
Control-vs-T2DM	FB_Cluster_5	ENSMUSG00000039263	Npepl1	0.090049381	0.48263551	134	118	0.03	0.136	2.420843472	0.006354382	1	up	Npepl1
Control-vs-T2DM	FB_Cluster_5	ENSMUSG00000024431	Nr3c1	2.084334249	2.876977408	134	118	0.41	0.602	0.464948173	0.006365151	1	up	Nr3c1
Control-vs-T2DM	FB_Cluster_5	ENSMUSG00000039206	Daglb	0.218869023	0.528091168	134	118	0.052	0.161	1.270333386	0.006541292	1	up	Daglb
Control-vs-T2DM	FB_Cluster_5	ENSMUSG00000040451	Sgms1	0.864455618	1.162851728	134	118	0.179	0.305	0.427760533	0.006563803	1	up	Sgms1
Control-vs-T2DM	FB_Cluster_5	ENSMUSG00000038349	Plcl1	1.577783732	2.910006291	134	118	0.291	0.483	0.883080945	0.007060051	1	up	Plcl1
Control-vs-T2DM	FB_Cluster_5	ENSMUSG00000024539	Ptpn2	0.374011972	0.552267077	134	118	0.075	0.161	0.562157199	0.007165039	1	up	Ptpn2
Control-vs-T2DM	FB_Cluster_5	ENSMUSG00000022538	Lsg1	0.22809178	0.446895371	134	118	0.06	0.161	0.970013067	0.00745355	1	up	Lsg1
Control-vs-T2DM	FB_Cluster_5	ENSMUSG00000008429	Herpud2	0.660023537	0.856315252	134	118	0.134	0.246	0.37557445	0.007576302	1	up	Herpud2
Control-vs-T2DM	FB_Cluster_5	ENSMUSG00000013973	Dedd	0.227340086	0.340663007	134	118	0.052	0.127	0.583282175	0.008120132	1	up	Dedd
Control-vs-T2DM	FB_Cluster_5	ENSMUSG00000033767	Tmem131l	0.228268846	0.363312997	134	118	0.045	0.119	0.670244165	0.008249452	1	up	Tmem131l
Control-vs-T2DM	FB_Cluster_5	ENSMUSG00000033361	Prrg3	0.117036685	0.385682505	134	118	0.03	0.127	1.719594745	0.008517196	1	up	Prrg3
Control-vs-T2DM	FB_Cluster_5	ENSMUSG00000035045	Zc3h12b	1.19952252	1.572799185	134	118	0.209	0.339	0.390845694	0.008611725	1	up	Zc3h12b
Control-vs-T2DM	FB_Cluster_5	ENSMUSG00000032939	Nup93	0.210716828	0.495807316	134	118	0.045	0.144	1.234080476	0.008826951	1	up	Nup93
Control-vs-T2DM	FB_Cluster_5	ENSMUSG00000041353	Tmem29	0.178708107	0.532104512	134	118	0.045	0.153	1.573568597	0.009012204	1	up	Tmem29
Control-vs-T2DM	FB_Cluster_5	ENSMUSG00000036707	Cab39	0.43965594	0.864232066	134	118	0.104	0.237	0.97488262	0.009376661	1	up	Cab39
Control-vs-T2DM	FB_Cluster_5	ENSMUSG00000085709	Gm14211	0.181620013	0.349808216	134	118	0.03	0.102	0.94525923	0.009537152	1	up	Gm14211
Control-vs-T2DM	FB_Cluster_5	ENSMUSG00000011114	Tbrg1	0.633805767	0.972066203	134	118	0.142	0.271	0.616934588	0.009768364	1	up	Tbrg1
Control-vs-T2DM	FB_Cluster_5	ENSMUSG00000020109	Dnajb12	0.233822865	0.626559959	134	118	0.06	0.178	1.421649928	0.00982635	1	up	Dnajb12
Control-vs-T2DM	FB_Cluster_5	ENSMUSG00000089812	Gm15867	0.140902475	0.275246424	134	118	0.03	0.102	0.965527387	0.010133363	1	up	Gm15867
Control-vs-T2DM	FB_Cluster_5	ENSMUSG00000020572	Nampt	0.357713568	0.760612166	134	118	0.082	0.203	1.088142583	0.010270927	1	up	Nampt
Control-vs-T2DM	FB_Cluster_5	ENSMUSG00000036188	Ankmy2	0.119657511	0.440091075	134	118	0.03	0.127	1.878013758	0.010949184	1	up	Ankmy2
Control-vs-T2DM	FB_Cluster_5	ENSMUSG00000062762	Ei24	0.416214688	0.641706555	134	118	0.09	0.186	0.624464066	0.010962785	1	up	Ei24
Control-vs-T2DM	FB_Cluster_5	ENSMUSG00000042680	Garem1	0.234131732	0.661221257	134	118	0.06	0.178	1.49741474	0.011029403	1	up	Garem1
Control-vs-T2DM	FB_Cluster_5	ENSMUSG00000031095	Cul4b	0.348103582	0.614756699	134	118	0.082	0.186	0.820319168	0.01124902	1	up	Cul4b
Control-vs-T2DM	FB_Cluster_5	ENSMUSG00000028402	Mpdz	1.42735825	2.160889228	134	118	0.299	0.475	0.59824333	0.01130308	1	up	Mpdz
Control-vs-T2DM	FB_Cluster_5	ENSMUSG00000001127	Araf	0.416494486	0.771313814	134	118	0.09	0.203	0.888861238	0.011320992	1	up	Araf
Control-vs-T2DM	FB_Cluster_5	ENSMUSG00000029156	Sgcb	0.407870989	0.745413427	134	118	0.104	0.229	0.869767771	0.011599019	1	up	Sgcb
Control-vs-T2DM	FB_Cluster_5	ENSMUSG00000044783	Hjurp	0.541753664	0.734654039	134	118	0.134	0.237	0.439358102	0.01166547	1	up	Hjurp
Control-vs-T2DM	FB_Cluster_5	ENSMUSG00000034165	Ccnd3	1.054017816	1.465564382	134	118	0.201	0.339	0.47551866	0.012353916	1	up	Ccnd3
Control-vs-T2DM	FB_Cluster_5	ENSMUSG00000022257	Laptm4b	0.394415981	0.722012562	134	118	0.097	0.212	0.872139998	0.012366351	1	up	Laptm4b
Control-vs-T2DM	FB_Cluster_5	ENSMUSG00000009733	Tfcp2	0.184308149	0.46582993	134	118	0.037	0.127	1.337210595	0.012388227	1	up	Tfcp2
Control-vs-T2DM	FB_Cluster_5	ENSMUSG00000087157	Sox5os2	0.088955658	0.386551273	134	118	0.022	0.11	2.11825379	0.012392918	1	up	Sox5os2
Control-vs-T2DM	FB_Cluster_5	ENSMUSG00000026349	Ccnt2	0.717506531	1.19305521	134	118	0.164	0.305	0.7335168	0.012536761	1	up	Ccnt2
Control-vs-T2DM	FB_Cluster_5	ENSMUSG00000015714	Cers2	0.489319286	0.660166715	134	118	0.119	0.212	0.431977966	0.012554806	1	up	Cers2
Control-vs-T2DM	FB_Cluster_5	ENSMUSG00000030105	Arl8b	0.518916271	0.846334659	134	118	0.119	0.237	0.705618937	0.013110316	1	up	Arl8b
Control-vs-T2DM	FB_Cluster_5	ENSMUSG00000002489	Tiam1	0.372457142	0.648588973	134	118	0.082	0.186	0.800065193	0.013263988	1	up	Tiam1
Control-vs-T2DM	FB_Cluster_5	ENSMUSG00000021192	Golga5	0.398096368	0.640688012	134	118	0.09	0.195	0.686367096	0.013407796	1	up	Golga5
Control-vs-T2DM	FB_Cluster_5	ENSMUSG00000028797	Tmem234	1.084160755	1.540342059	134	118	0.231	0.373	0.506632665	0.013543579	1	up	Tmem234
Control-vs-T2DM	FB_Cluster_5	ENSMUSG00000034290	Nek9	0.324299087	0.614395507	134	118	0.06	0.153	0.921632703	0.013988572	1	up	Nek9
Control-vs-T2DM	FB_Cluster_5	ENSMUSG00000032046	Abhd12	0.364003063	0.749573746	134	118	0.09	0.212	1.041916003	0.014165258	1	up	Abhd12
Control-vs-T2DM	FB_Cluster_5	ENSMUSG00000036644	Tbc1d9b	0.46413469	0.947837841	134	118	0.112	0.246	1.029938128	0.014527712	1	up	Tbc1d9b
Control-vs-T2DM	FB_Cluster_5	ENSMUSG00000033009	Ogfod1	0.153044251	0.451849841	134	118	0.03	0.119	1.561271453	0.014706959	1	up	Ogfod1
Control-vs-T2DM	FB_Cluster_5	ENSMUSG00000021140	Pcnx	1.053321283	1.555335157	134	118	0.246	0.398	0.562235739	0.014907729	1	up	Pcnx
Control-vs-T2DM	FB_Cluster_5	ENSMUSG00000031960	Aars	0.193127117	0.359709486	134	118	0.045	0.127	0.896935652	0.014934855	1	up	Aars
Control-vs-T2DM	FB_Cluster_5	ENSMUSG00000037622	Wdtc1	0.133630434	0.462909509	134	118	0.03	0.119	1.791713991	0.015499853	1	up	Wdtc1
Control-vs-T2DM	FB_Cluster_5	ENSMUSG00000033382	Trappc8	0.735779833	1.197948144	134	118	0.164	0.297	0.703143781	0.015918531	1	up	Trappc8
Control-vs-T2DM	FB_Cluster_5	ENSMUSG00000013033	Adgrl1	0.371998728	0.545064681	134	118	0.075	0.169	0.55100664	0.016125673	1	up	Adgrl1
Control-vs-T2DM	FB_Cluster_5	ENSMUSG00000031681	Smad1	0.474481989	0.808635247	134	118	0.112	0.229	0.769010138	0.016146696	1	up	Smad1
Control-vs-T2DM	FB_Cluster_5	ENSMUSG00000032554	Trf	0.738844585	1.35560555	134	118	0.134	0.271	0.875505786	0.016219607	1	up	Trf
Control-vs-T2DM	FB_Cluster_5	ENSMUSG00000026017	Carf	0.115140528	0.392084195	134	118	0.03	0.119	1.766883225	0.016231295	1	up	Carf
Control-vs-T2DM	FB_Cluster_5	ENSMUSG00000040297	Suco	0.536301379	0.879941131	134	118	0.119	0.237	0.714258008	0.016389479	1	up	Suco
Control-vs-T2DM	FB_Cluster_5	ENSMUSG00000034667	Xpot	0.321469703	0.682526103	134	118	0.075	0.186	1.085964095	0.016431451	1	up	Xpot
Control-vs-T2DM	FB_Cluster_5	ENSMUSG00000041075	Fzd7	0.331245497	0.647876295	134	118	0.06	0.161	0.967604724	0.016517517	1	up	Fzd7
Control-vs-T2DM	FB_Cluster_5	ENSMUSG00000019971	Cep290	0.184433122	0.52653866	134	118	0.045	0.144	1.512933641	0.016731294	1	up	Cep290
Control-vs-T2DM	FB_Cluster_5	ENSMUSG00000020107	Anapc16	0.567805105	0.75584262	134	118	0.119	0.212	0.41262685	0.016839391	1	up	Anapc16
Control-vs-T2DM	FB_Cluster_5	ENSMUSG00000019809	Pex3	0.269202675	0.4909772	134	118	0.052	0.136	0.86672128	0.017117819	1	up	Pex3
Control-vs-T2DM	FB_Cluster_5	ENSMUSG00000079184	Mphosph8	0.53687145	0.816751221	134	118	0.104	0.212	0.60522795	0.017608651	1	up	Mphosph8
Control-vs-T2DM	FB_Cluster_5	ENSMUSG00000040596	Pogk	0.196007917	0.324385026	134	118	0.045	0.119	0.726504128	0.017658843	1	up	Pogk
Control-vs-T2DM	FB_Cluster_5	ENSMUSG00000021831	Ero1l	0.179528142	0.517498466	134	118	0.045	0.144	1.526819946	0.017725646	1	up	Ero1l
Control-vs-T2DM	FB_Cluster_5	ENSMUSG00000034157	Cipc	0.278755932	0.361300726	134	118	0.06	0.127	0.374079443	0.018161628	1	up	Cipc
Control-vs-T2DM	FB_Cluster_5	ENSMUSG00000030220	Arhgdib	0.232233397	0.432827558	134	118	0.052	0.136	0.897929089	0.018562934	1	up	Arhgdib
Control-vs-T2DM	FB_Cluster_5	ENSMUSG00000032553	Srprb	0.342041972	0.569228844	134	118	0.075	0.169	0.734667095	0.018681302	1	up	Srprb
Control-vs-T2DM	FB_Cluster_5	ENSMUSG00000033439	Trmt13	0.269157099	0.44835557	134	118	0.06	0.144	0.73598068	0.018780797	1	up	Trmt13
Control-vs-T2DM	FB_Cluster_5	ENSMUSG00000052698	Tln2	0.967039514	1.247431117	134	118	0.187	0.305	0.367279875	0.018890955	1	up	Tln2
Control-vs-T2DM	FB_Cluster_5	ENSMUSG00000029313	Aff1	1.262888068	1.819554107	134	118	0.254	0.398	0.526823229	0.018908862	1	up	Aff1
Control-vs-T2DM	FB_Cluster_5	ENSMUSG00000038005	Hpf1	0.315484422	0.518397573	134	118	0.067	0.153	0.716311241	0.019279133	1	up	Hpf1
Control-vs-T2DM	FB_Cluster_5	ENSMUSG00000030330	Ing4	0.169652205	0.407378088	134	118	0.045	0.136	1.263292167	0.019444081	1	up	Ing4
Control-vs-T2DM	FB_Cluster_5	ENSMUSG00000019370	Calm3	0.500112097	0.961723776	134	118	0.119	0.246	0.943232641	0.019518326	1	up	Calm3
Control-vs-T2DM	FB_Cluster_5	ENSMUSG00000022663	Atg3	0.576493203	0.825354871	134	118	0.134	0.237	0.517635513	0.019595629	1	up	Atg3
Control-vs-T2DM	FB_Cluster_5	ENSMUSG00000070002	Ell	0.194494549	0.567083785	134	118	0.037	0.127	1.543344993	0.020480485	1	up	Ell
Control-vs-T2DM	FB_Cluster_5	ENSMUSG00000059475	Zfp426	0.188230131	0.383188209	134	118	0.045	0.127	1.025165785	0.020584014	1	up	Zfp426
Control-vs-T2DM	FB_Cluster_5	ENSMUSG00000033965	Slc16a2	1.097470652	1.665575688	134	118	0.209	0.356	0.60179372	0.020826505	1	up	Slc16a2
Control-vs-T2DM	FB_Cluster_5	ENSMUSG00000037339	Fam53a	0.252233188	0.481846333	134	118	0.067	0.161	0.933542534	0.021247121	1	up	Fam53a
Control-vs-T2DM	FB_Cluster_5	ENSMUSG00000022674	Ube2v2	0.467639956	0.850229453	134	118	0.112	0.229	0.862315235	0.021280279	1	up	Ube2v2
Control-vs-T2DM	FB_Cluster_5	ENSMUSG00000085284	Gm16189	0.216167861	0.405123009	134	118	0.03	0.102	0.90589681	0.021456008	1	up	Gm16189
Control-vs-T2DM	FB_Cluster_5	ENSMUSG00000075470	Alg10b	0.080393362	0.310256048	134	118	0.022	0.102	1.946982536	0.02158762	1	up	Alg10b
Control-vs-T2DM	FB_Cluster_5	ENSMUSG00000040430	Pitpnc1	0.17488792	0.572474439	134	118	0.045	0.144	1.710207933	0.021829064	1	up	Pitpnc1
Control-vs-T2DM	FB_Cluster_5	ENSMUSG00000040711	Sh3pxd2b	0.512348052	1.011174395	134	118	0.119	0.246	0.980696836	0.02201359	1	up	Sh3pxd2b
Control-vs-T2DM	FB_Cluster_5	ENSMUSG00000022451	Twf1	0.253943827	0.435499571	134	118	0.06	0.144	0.777925125	0.022080816	1	up	Twf1
Control-vs-T2DM	FB_Cluster_5	ENSMUSG00000020176	Grb10	0.760785151	1.067929894	134	118	0.179	0.305	0.489201415	0.022324083	1	up	Grb10
Control-vs-T2DM	FB_Cluster_5	ENSMUSG00000061028	Clasrp	0.135002764	0.300582248	134	118	0.03	0.102	1.154182508	0.022489574	1	up	Clasrp
Control-vs-T2DM	FB_Cluster_5	ENSMUSG00000026812	Tsc1	0.291287071	0.418060693	134	118	0.075	0.153	0.521120589	0.022744448	1	up	Tsc1
Control-vs-T2DM	FB_Cluster_5	ENSMUSG00000049411	Tmem241	0.14425652	0.407631634	134	118	0.03	0.11	1.497983622	0.023338607	1	up	Tmem241
Control-vs-T2DM	FB_Cluster_5	ENSMUSG00000016921	Srsf6	0.402084528	0.76836276	134	118	0.097	0.212	0.934117766	0.023808733	1	up	Srsf6
Control-vs-T2DM	FB_Cluster_5	ENSMUSG00000021619	Atg10	0.482418322	0.757458814	134	118	0.104	0.203	0.650774173	0.024445993	1	up	Atg10
Control-vs-T2DM	FB_Cluster_5	ENSMUSG00000033326	Kdm4a	0.072449347	0.32541509	134	118	0.022	0.102	2.16568989	0.024755553	1	up	Kdm4a
Control-vs-T2DM	FB_Cluster_5	ENSMUSG00000056486	Chn1	0.194419982	0.388272235	134	118	0.045	0.127	0.997521704	0.024762601	1	up	Chn1
Control-vs-T2DM	FB_Cluster_5	ENSMUSG00000035086	Becn1	0.281415758	0.37899227	134	118	0.06	0.127	0.429333359	0.024992887	1	up	Becn1
Control-vs-T2DM	FB_Cluster_5	ENSMUSG00000022999	Lmbr1l	0.160468316	0.321588034	134	118	0.037	0.11	1.002475033	0.025203729	1	up	Lmbr1l
Control-vs-T2DM	FB_Cluster_5	ENSMUSG00000014601	Strip1	0.290218919	0.442554918	134	118	0.067	0.144	0.608543861	0.025271148	1	up	Strip1
Control-vs-T2DM	FB_Cluster_5	ENSMUSG00000029461	Fam168a	0.912408895	1.339573345	134	118	0.179	0.305	0.553970742	0.025438029	1	up	Fam168a
Control-vs-T2DM	FB_Cluster_5	ENSMUSG00000028405	Aco1	0.175964836	0.442945473	134	118	0.037	0.119	1.331347981	0.025557264	1	up	Aco1
Control-vs-T2DM	FB_Cluster_5	ENSMUSG00000059518	Znhit1	0.275655703	0.441876888	134	118	0.067	0.144	0.680580207	0.025630824	1	up	Znhit1
Control-vs-T2DM	FB_Cluster_5	ENSMUSG00000022641	Bbx	0.517866402	0.817362778	134	118	0.112	0.22	0.658294521	0.025856416	1	up	Bbx
Control-vs-T2DM	FB_Cluster_5	ENSMUSG00000068328	Aup1	0.268479249	0.404804009	134	118	0.052	0.119	0.592232085	0.026225595	1	up	Aup1
Control-vs-T2DM	FB_Cluster_5	ENSMUSG00000021754	Map3k1	0.167994288	0.341092562	134	118	0.037	0.11	1.021315495	0.026297582	1	up	Map3k1
Control-vs-T2DM	FB_Cluster_5	ENSMUSG00000028998	Tomm7	0.869238439	1.367203583	134	118	0.179	0.297	0.65334376	0.026506407	1	up	Tomm7
Control-vs-T2DM	FB_Cluster_5	ENSMUSG00000058006	Mdn1	0.260946563	0.497313259	134	118	0.067	0.161	0.9301378	0.026633423	1	up	Mdn1
Control-vs-T2DM	FB_Cluster_5	ENSMUSG00000001288	Rarg	0.258791369	0.577982115	134	118	0.067	0.169	1.158927566	0.026743672	1	up	Rarg
Control-vs-T2DM	FB_Cluster_5	ENSMUSG00000042772	Smg7	0.493500636	0.638087328	134	118	0.112	0.195	0.370635708	0.026937665	1	up	Smg7
Control-vs-T2DM	FB_Cluster_5	ENSMUSG00000036309	Skp1a	0.62740086	0.947234238	134	118	0.142	0.254	0.59425609	0.027068919	1	up	Skp1a
Control-vs-T2DM	FB_Cluster_5	ENSMUSG00000035585	Tsen34	0.216165615	0.532026457	134	118	0.06	0.161	1.29896483	0.027622032	1	up	Tsen34
Control-vs-T2DM	FB_Cluster_5	ENSMUSG00000044991	Shld1	0.12746351	0.422733635	134	118	0.037	0.127	1.728874444	0.027766557	1	up	Shld1
Control-vs-T2DM	FB_Cluster_5	ENSMUSG00000031839	Hsbp1	0.443914881	0.686500327	134	118	0.09	0.178	0.628862517	0.02789506	1	up	Hsbp1
Control-vs-T2DM	FB_Cluster_5	ENSMUSG00000034101	Ctnnd1	0.145345333	0.421550001	134	118	0.03	0.11	1.535568958	0.028029307	1	up	Ctnnd1
Control-vs-T2DM	FB_Cluster_5	ENSMUSG00000020124	Usp15	0.763710206	1.176200413	134	118	0.194	0.322	0.622970451	0.028778017	1	up	Usp15
Control-vs-T2DM	FB_Cluster_5	ENSMUSG00000013622	Atraid	0.977431574	1.339518192	134	118	0.216	0.331	0.454606667	0.028854321	1	up	Atraid
Control-vs-T2DM	FB_Cluster_5	ENSMUSG00000028577	Plaa	0.47401076	0.670387039	134	118	0.112	0.203	0.499985307	0.02888163	1	up	Plaa
Control-vs-T2DM	FB_Cluster_5	ENSMUSG00000059273	Zc3h4	0.19608864	0.453460357	134	118	0.052	0.144	1.209053038	0.029155649	1	up	Zc3h4
Control-vs-T2DM	FB_Cluster_5	ENSMUSG00000007656	Arpp19	0.720988188	1.216470827	134	118	0.142	0.254	0.754572699	0.029267537	1	up	Arpp19
Control-vs-T2DM	FB_Cluster_5	ENSMUSG00000042138	Msantd2	0.397324985	0.564811052	134	118	0.097	0.186	0.507341151	0.029517408	1	up	Msantd2
Control-vs-T2DM	FB_Cluster_5	ENSMUSG00000001419	Mef2d	0.591189685	0.839029099	134	118	0.142	0.246	0.505027673	0.030393132	1	up	Mef2d
Control-vs-T2DM	FB_Cluster_5	ENSMUSG00000056076	Eif3b	0.234982118	0.509420556	134	118	0.06	0.153	1.115975549	0.030782141	1	up	Eif3b
Control-vs-T2DM	FB_Cluster_5	ENSMUSG00000021518	Ptdss1	0.215710326	0.357065864	134	118	0.06	0.136	0.726830309	0.031250858	1	up	Ptdss1
Control-vs-T2DM	FB_Cluster_5	ENSMUSG00000027651	Rprd1b	0.20643705	0.502897314	134	118	0.052	0.144	1.284150091	0.03175146	1	up	Rprd1b
Control-vs-T2DM	FB_Cluster_5	ENSMUSG00000040374	Pex2	0.248789187	0.558154852	134	118	0.052	0.144	1.165420329	0.031805606	1	up	Pex2
Control-vs-T2DM	FB_Cluster_5	ENSMUSG00000000532	Acvr1b	0.214550975	0.477923559	134	118	0.045	0.127	1.155088993	0.031885911	1	up	Acvr1b
Control-vs-T2DM	FB_Cluster_5	ENSMUSG00000021816	Ppp3cb	0.778634104	1.295716419	134	118	0.172	0.305	0.734658629	0.031987394	1	up	Ppp3cb
Control-vs-T2DM	FB_Cluster_5	ENSMUSG00000016495	Plgrkt	0.444359708	0.64917128	134	118	0.104	0.195	0.546768755	0.032261993	1	up	Plgrkt
Control-vs-T2DM	FB_Cluster_5	ENSMUSG00000017760	Ctsa	0.516586729	1.05337893	134	118	0.127	0.254	1.027799727	0.03248512	1	up	Ctsa
Control-vs-T2DM	FB_Cluster_5	ENSMUSG00000032333	Stoml1	0.115868449	0.291634751	134	118	0.03	0.102	1.330924894	0.033048438	1	up	Stoml1
Control-vs-T2DM	FB_Cluster_5	ENSMUSG00000025228	Actr1a	0.429368742	0.575713959	134	118	0.082	0.169	0.42304963	0.033123197	1	up	Actr1a
Control-vs-T2DM	FB_Cluster_5	ENSMUSG00000017615	Tnfaip1	0.299077191	0.499795266	134	118	0.075	0.161	0.740625676	0.033200393	1	up	Tnfaip1
Control-vs-T2DM	FB_Cluster_5	ENSMUSG00000063275	Hacd1	0.238683137	0.536649614	134	118	0.045	0.127	1.16854829	0.033216507	1	up	Hacd1
Control-vs-T2DM	FB_Cluster_5	ENSMUSG00000026342	Slc35f5	0.513097393	0.818903559	134	118	0.112	0.212	0.67435588	0.033434568	1	up	Slc35f5
Control-vs-T2DM	FB_Cluster_5	ENSMUSG00000022722	Arl6	0.126440932	0.477233383	134	118	0.03	0.11	1.915393112	0.03409844	1	up	Arl6
Control-vs-T2DM	FB_Cluster_5	ENSMUSG00000023009	Nckap5l	0.167155905	0.492400081	134	118	0.045	0.136	1.55806681	0.03455777	1	up	Nckap5l
Control-vs-T2DM	FB_Cluster_5	ENSMUSG00000035354	Uvrag	0.89846073	1.260686905	134	118	0.201	0.322	0.488636537	0.034938745	1	up	Uvrag
Control-vs-T2DM	FB_Cluster_5	ENSMUSG00000074863	Platr25	0.314730416	0.405600476	134	118	0.067	0.127	0.365840069	0.035277686	1	up	Platr25
Control-vs-T2DM	FB_Cluster_5	ENSMUSG00000005354	Txn2	0.296549847	0.489177802	134	118	0.052	0.127	0.721892793	0.035605254	1	up	Txn2
Control-vs-T2DM	FB_Cluster_5	ENSMUSG00000112925	Gm31763	0.189598185	0.469797254	134	118	0.052	0.144	1.30863946	0.035924777	1	up	Gm31763
Control-vs-T2DM	FB_Cluster_5	ENSMUSG00000045664	Cdc42ep2	0.534776689	0.730554098	134	118	0.104	0.186	0.449982247	0.035951022	1	up	Cdc42ep2
Control-vs-T2DM	FB_Cluster_5	ENSMUSG00000024542	Cep192	0.198311027	0.379893808	134	118	0.06	0.144	0.937483698	0.03660746	1	up	Cep192
Control-vs-T2DM	FB_Cluster_5	ENSMUSG00000005813	Metap1	0.142921638	0.371369267	134	118	0.03	0.102	1.377009425	0.03689458	1	up	Metap1
Control-vs-T2DM	FB_Cluster_5	ENSMUSG00000062312	Erbb2	0.129496134	0.353759681	134	118	0.037	0.119	1.449154703	0.037215141	1	up	Erbb2
Control-vs-T2DM	FB_Cluster_5	ENSMUSG00000037553	Zdhhc18	0.190118159	0.342525736	134	118	0.052	0.127	0.848978547	0.038117047	1	up	Zdhhc18
Control-vs-T2DM	FB_Cluster_5	ENSMUSG00000055371	Stam2	0.358134424	0.485831722	134	118	0.09	0.161	0.439849638	0.03843202	1	up	Stam2
Control-vs-T2DM	FB_Cluster_5	ENSMUSG00000031596	Slc7a2	0.392550548	0.716163379	134	118	0.097	0.203	0.867244272	0.038653636	1	up	Slc7a2
Control-vs-T2DM	FB_Cluster_5	ENSMUSG00000032264	Zw10	0.192966053	0.332709499	134	118	0.037	0.102	0.785602094	0.038775175	1	up	Zw10
Control-vs-T2DM	FB_Cluster_5	ENSMUSG00000029030	Tprgl	0.437476205	0.649477647	134	118	0.09	0.178	0.5699677	0.039414875	1	up	Tprgl
Control-vs-T2DM	FB_Cluster_5	ENSMUSG00000031024	Denn2b	1.123068258	1.75603196	134	118	0.231	0.373	0.644827188	0.039538229	1	up	Denn2b
Control-vs-T2DM	FB_Cluster_5	ENSMUSG00000103435	Gm36992	0.206410161	0.327015318	134	118	0.045	0.11	0.663586546	0.039642918	1	up	Gm36992
Control-vs-T2DM	FB_Cluster_5	ENSMUSG00000036617	Etl4	0.334542492	0.730020709	134	118	0.075	0.178	1.125514355	0.039660452	1	up	Etl4
Control-vs-T2DM	FB_Cluster_5	ENSMUSG00000028550	Atg4c	0.183836061	0.308584163	134	118	0.037	0.102	0.746927115	0.040221841	1	up	Atg4c
Control-vs-T2DM	FB_Cluster_5	ENSMUSG00000050989	Selenon	0.383724625	0.832159547	134	118	0.104	0.22	1.116586242	0.040741354	1	up	Selenon
Control-vs-T2DM	FB_Cluster_5	ENSMUSG00000031668	Eif2ak3	0.493532179	0.718279818	134	118	0.119	0.212	0.541310377	0.04092551	1	up	Eif2ak3
Control-vs-T2DM	FB_Cluster_5	ENSMUSG00000111375	Btbd8	0.174126568	0.29679425	134	118	0.037	0.102	0.768984513	0.040953498	1	up	Btbd8
Control-vs-T2DM	FB_Cluster_5	ENSMUSG00000054808	Actn4	0.622293345	0.978359837	134	118	0.149	0.263	0.652685998	0.041131212	1	up	Actn4
Control-vs-T2DM	FB_Cluster_5	ENSMUSG00000018565	Elp5	0.200898302	0.292711968	134	118	0.045	0.102	0.542791209	0.041456098	1	up	Elp5
Control-vs-T2DM	FB_Cluster_5	ENSMUSG00000026853	Crat	0.213816764	0.348219409	134	118	0.052	0.119	0.703361316	0.041702292	1	up	Crat
Control-vs-T2DM	FB_Cluster_5	ENSMUSG00000023055	Calcoco1	0.127697816	0.287238709	134	118	0.037	0.11	1.168889175	0.041777232	1	up	Calcoco1
Control-vs-T2DM	FB_Cluster_5	ENSMUSG00000031774	Fam192a	0.20969665	0.312551766	134	118	0.045	0.102	0.575565028	0.04206878	1	up	Fam192a
Control-vs-T2DM	FB_Cluster_5	ENSMUSG00000044791	Setd2	1.179445709	1.872537868	134	118	0.261	0.407	0.66684061	0.042909819	1	up	Setd2
Control-vs-T2DM	FB_Cluster_5	ENSMUSG00000007827	Ankrd26	0.113302134	0.473507353	134	118	0.037	0.11	2.062243696	0.043093973	1	up	Ankrd26
Control-vs-T2DM	FB_Cluster_5	ENSMUSG00000027896	Slc16a4	0.149231052	0.339582531	134	118	0.037	0.11	1.185672834	0.043424064	1	up	Slc16a4
Control-vs-T2DM	FB_Cluster_5	ENSMUSG00000025950	Idh1	0.191173071	0.551653701	134	118	0.052	0.144	1.528390628	0.044047878	1	up	Idh1
Control-vs-T2DM	FB_Cluster_5	ENSMUSG00000033760	Rbm4b	0.339747265	0.695571948	134	118	0.09	0.195	1.033520634	0.044261287	1	up	Rbm4b
Control-vs-T2DM	FB_Cluster_5	ENSMUSG00000038648	Creb3l2	2.686730678	4.097374999	134	118	0.493	0.627	0.60882974	0.044291939	1	up	Creb3l2
Control-vs-T2DM	FB_Cluster_5	ENSMUSG00000036372	Tmem258	0.966156532	1.256276082	134	118	0.201	0.305	0.378790217	0.044597375	1	up	Tmem258
Control-vs-T2DM	FB_Cluster_5	ENSMUSG00000023021	Cers5	0.701053919	0.974958708	134	118	0.164	0.263	0.475757902	0.045172903	1	up	Cers5
Control-vs-T2DM	FB_Cluster_5	ENSMUSG00000027712	Anxa5	2.050230694	2.683420748	134	118	0.358	0.5	0.388270424	0.046554361	1	up	Anxa5
Control-vs-T2DM	FB_Cluster_5	ENSMUSG00000002728	Naa20	0.579538187	0.747534746	134	118	0.127	0.212	0.367180975	0.046632376	1	up	Naa20
Control-vs-T2DM	FB_Cluster_5	ENSMUSG00000021007	Spata7	0.107397644	0.294349368	134	118	0.03	0.102	1.453714542	0.047028777	1	up	Spata7
Control-vs-T2DM	FB_Cluster_5	ENSMUSG00000050248	Evc2	0.466971699	0.842835316	134	118	0.119	0.229	0.851777898	0.047509789	1	up	Evc2
Control-vs-T2DM	FB_Cluster_5	ENSMUSG00000020289	Nprl3	0.241936576	0.432092123	134	118	0.06	0.136	0.8364477	0.047538826	1	up	Nprl3
Control-vs-T2DM	FB_Cluster_5	ENSMUSG00000069539	Scyl2	0.187476254	0.283220023	134	118	0.045	0.102	0.594955361	0.047547125	1	up	Scyl2
Control-vs-T2DM	FB_Cluster_5	ENSMUSG00000026810	Dpm2	0.165528884	0.314276795	134	118	0.037	0.102	0.924540449	0.048591702	1	up	Dpm2
Control-vs-T2DM	FB_Cluster_5	ENSMUSG00000018415	Gid4	0.109715381	0.321318046	134	118	0.03	0.102	1.549370792	0.048617074	1	up	Gid4
Control-vs-T2DM	FB_Cluster_5	ENSMUSG00000038481	Cdk19	0.686976476	0.907000747	134	118	0.157	0.246	0.400792103	0.048757604	1	up	Cdk19
Control-vs-T2DM	FB_Cluster_5	ENSMUSG00000047153	Khnyn	0.120277495	0.336811393	134	118	0.03	0.102	1.484803517	0.049336622	1	up	Khnyn
Control-vs-T2DM	FB_Cluster_5	ENSMUSG00000024074	Crim1	0.387815095	0.662101965	134	118	0.104	0.203	0.771530375	0.049572956	1	up	Crim1
Control-vs-T2DM	FB_Cluster_5	ENSMUSG00000053475	Tnfaip6	0.245021771	0.380186561	134	118	0.052	0.119	0.633588332	0.049622838	1	up	Tnfaip6
Control-vs-T2DM	FB_Cluster_5	ENSMUSG00000027883	Gpsm2	0.225365794	0.347404576	134	118	0.052	0.119	0.624123401	0.049659195	1	up	Gpsm2
Control-vs-T2DM	FB_Cluster_6	ENSMUSG00000025981	Coq10b	0.146160591	0.724571364	98	135	0.02	0.163	2.308785793	0.000216445	1	up	Coq10b
Control-vs-T2DM	FB_Cluster_6	ENSMUSG00000052726	Kcnt2	12.5988657	19.40081689	98	135	0.857	0.889	0.622819534	0.000299903	1	up	Kcnt2
Control-vs-T2DM	FB_Cluster_6	ENSMUSG00000020516	Rps6kb1	1.084406828	2.100129696	98	135	0.173	0.393	0.953507984	0.000580957	1	up	Rps6kb1
Control-vs-T2DM	FB_Cluster_6	ENSMUSG00000020422	Tns3	0.348336388	0.899177574	98	135	0.061	0.222	1.367871198	0.000593717	1	up	Tns3
Control-vs-T2DM	FB_Cluster_6	ENSMUSG00000040322	Slc25a24	0.06834616	0.697397381	98	135	0.01	0.133	3.349146297	0.000658223	1	up	Slc25a24
Control-vs-T2DM	FB_Cluster_6	ENSMUSG00000030759	Far1	0.858491569	1.18745354	98	135	0.122	0.252	0.467948646	0.00166124	1	up	Far1
Control-vs-T2DM	FB_Cluster_6	ENSMUSG00000038168	P3h2	0.738544855	1.550012742	98	135	0.082	0.237	1.06942037	0.001687751	1	up	P3h2
Control-vs-T2DM	FB_Cluster_6	ENSMUSG00000049339	Retreg2	0.062486722	0.514465083	98	135	0.01	0.119	3.039425051	0.001789163	1	up	Retreg2
Control-vs-T2DM	FB_Cluster_6	ENSMUSG00000047712	Ust	2.129827721	3.663485737	98	135	0.265	0.489	0.782451905	0.001882446	1	up	Ust
Control-vs-T2DM	FB_Cluster_6	ENSMUSG00000042116	Vwa1	0.35888908	0.840374017	98	135	0.051	0.178	1.227263259	0.001967738	1	up	Vwa1
Control-vs-T2DM	FB_Cluster_6	ENSMUSG00000056770	Setd3	0.679988662	1.061569491	98	135	0.102	0.23	0.642539964	0.002300838	1	up	Setd3
Control-vs-T2DM	FB_Cluster_6	ENSMUSG00000021288	Klc1	0.751158114	1.514372395	98	135	0.133	0.311	1.011434708	0.002825566	1	up	Klc1
Control-vs-T2DM	FB_Cluster_6	ENSMUSG00000032422	Snx14	0.243469634	0.765935128	98	135	0.041	0.17	1.653076272	0.002899251	1	up	Snx14
Control-vs-T2DM	FB_Cluster_6	ENSMUSG00000049940	Pgrmc2	0.243949625	0.524490297	98	135	0.041	0.148	1.104016591	0.003576786	1	up	Pgrmc2
Control-vs-T2DM	FB_Cluster_6	ENSMUSG00000048756	Foxo3	0.558472901	1.239542231	98	135	0.112	0.281	1.150106321	0.003642935	1	up	Foxo3
Control-vs-T2DM	FB_Cluster_6	ENSMUSG00000039842	Mcph1	0.05979538	0.712200321	98	135	0.01	0.111	3.571969005	0.003770821	1	up	Mcph1
Control-vs-T2DM	FB_Cluster_6	ENSMUSG00000042046	Dstyk	0.148250131	0.756207825	98	135	0.031	0.156	2.349967344	0.003999911	1	up	Dstyk
Control-vs-T2DM	FB_Cluster_6	ENSMUSG00000037110	Ralgapa2	0.405062374	1.253677282	98	135	0.061	0.207	1.629708988	0.004000268	1	up	Ralgapa2
Control-vs-T2DM	FB_Cluster_6	ENSMUSG00000079557	Marchf2	0.272160522	0.833584903	98	135	0.051	0.185	1.614514404	0.004115363	1	up	Marchf2
Control-vs-T2DM	FB_Cluster_6	ENSMUSG00000023026	Dip2b	0.81859548	1.577844094	98	135	0.122	0.281	0.946647256	0.004127841	1	up	Dip2b
Control-vs-T2DM	FB_Cluster_6	ENSMUSG00000026743	Mllt10	1.81185221	2.964097233	98	135	0.255	0.452	0.71009654	0.004424668	1	up	Mllt10
Control-vs-T2DM	FB_Cluster_6	ENSMUSG00000015697	Setdb1	0.296542925	0.942632427	98	135	0.061	0.207	1.668120978	0.004436353	1	up	Setdb1
Control-vs-T2DM	FB_Cluster_6	ENSMUSG00000006191	Cdkal1	1.231750925	1.672207895	98	135	0.163	0.296	0.441012816	0.004628522	1	up	Cdkal1
Control-vs-T2DM	FB_Cluster_6	ENSMUSG00000009555	Cdk9	0.079132079	0.518154702	98	135	0.01	0.104	2.709504731	0.004706979	1	up	Cdk9
Control-vs-T2DM	FB_Cluster_6	ENSMUSG00000031684	Slc10a7	0.761144448	1.015394391	98	135	0.122	0.237	0.415750565	0.005054945	1	up	Slc10a7
Control-vs-T2DM	FB_Cluster_6	ENSMUSG00000031342	Gpm6b	2.76457107	3.773680341	98	135	0.327	0.511	0.448902607	0.005622456	1	up	Gpm6b
Control-vs-T2DM	FB_Cluster_6	ENSMUSG00000079426	Arpc4	0.143748341	0.635617427	98	135	0.031	0.148	2.143837053	0.006042478	1	up	Arpc4
Control-vs-T2DM	FB_Cluster_6	ENSMUSG00000003423	Pih1d1	0.035035473	0.452607275	98	135	0.01	0.104	3.687578247	0.006218575	1	up	Pih1d1
Control-vs-T2DM	FB_Cluster_6	ENSMUSG00000026970	Rbms1	5.314812242	7.963895006	98	135	0.673	0.733	0.583446446	0.006351811	1	up	Rbms1
Control-vs-T2DM	FB_Cluster_6	ENSMUSG00000020170	Frs2	0.425900963	1.105214685	98	135	0.092	0.244	1.375528568	0.007614203	1	up	Frs2
Control-vs-T2DM	FB_Cluster_6	ENSMUSG00000033209	Ttc28	2.232646207	3.358064395	98	135	0.286	0.481	0.588853586	0.00793086	1	up	Ttc28
Control-vs-T2DM	FB_Cluster_6	ENSMUSG00000041540	Sox5	4.246875417	5.709461553	98	135	0.439	0.637	0.426944205	0.008112336	1	up	Sox5
Control-vs-T2DM	FB_Cluster_6	ENSMUSG00000023965	Fbxl17	3.093457722	5.299692597	98	135	0.408	0.607	0.776668949	0.008257833	1	up	Fbxl17
Control-vs-T2DM	FB_Cluster_6	ENSMUSG00000031715	Smarca5	0.96963643	2.110778637	98	135	0.163	0.341	1.122179046	0.008427119	1	up	Smarca5
Control-vs-T2DM	FB_Cluster_6	ENSMUSG00000024921	Smarca2	1.615653584	2.193569987	98	135	0.245	0.407	0.441139313	0.009538545	1	up	Smarca2
Control-vs-T2DM	FB_Cluster_6	ENSMUSG00000038193	Hand2	0.129312136	0.593628066	98	135	0.031	0.141	2.197829392	0.010155234	1	up	Hand2
Control-vs-T2DM	FB_Cluster_6	ENSMUSG00000047045	Tmem164	0.843923821	1.532701423	98	135	0.133	0.281	0.860815183	0.010498616	1	up	Tmem164
Control-vs-T2DM	FB_Cluster_6	ENSMUSG00000032827	Ppp1r9a	0.356909204	1.025758309	98	135	0.051	0.17	1.522798305	0.010788541	1	up	Ppp1r9a
Control-vs-T2DM	FB_Cluster_6	ENSMUSG00000062232	Rapgef2	1.477294815	2.490207626	98	135	0.214	0.385	0.753268549	0.010945702	1	up	Rapgef2
Control-vs-T2DM	FB_Cluster_6	ENSMUSG00000039831	Arhgap29	0.659847555	1.24484117	98	135	0.112	0.252	0.915654283	0.011281554	1	up	Arhgap29
Control-vs-T2DM	FB_Cluster_6	ENSMUSG00000042167	Tent2	0.598306356	1.496089424	98	135	0.112	0.267	1.322095436	0.011445676	1	up	Tent2
Control-vs-T2DM	FB_Cluster_6	ENSMUSG00000015837	Sqstm1	0.868226102	1.27766878	98	135	0.143	0.267	0.557317938	0.012018905	1	up	Sqstm1
Control-vs-T2DM	FB_Cluster_6	ENSMUSG00000079614	Seh1l	0.057754256	0.582457186	98	135	0.02	0.111	3.331904676	0.012039721	1	up	Seh1l
Control-vs-T2DM	FB_Cluster_6	ENSMUSG00000022681	Ntan1	0.259401487	0.927440589	98	135	0.071	0.193	1.837667608	0.012257338	1	up	Ntan1
Control-vs-T2DM	FB_Cluster_6	ENSMUSG00000024109	Nrxn1	2.144757716	8.20565938	98	135	0.102	0.163	1.935754904	0.012496471	1	up	Nrxn1
Control-vs-T2DM	FB_Cluster_6	ENSMUSG00000036499	Eea1	0.882623987	1.794207083	98	135	0.153	0.319	1.023392511	0.012983723	1	up	Eea1
Control-vs-T2DM	FB_Cluster_6	ENSMUSG00000031965	Tbx20	10.4515557	15.62020765	98	135	0.755	0.763	0.579691364	0.013411184	1	up	Tbx20
Control-vs-T2DM	FB_Cluster_6	ENSMUSG00000015087	Rabl6	0.961198114	1.342269332	98	135	0.153	0.274	0.481725853	0.013957985	1	up	Rabl6
Control-vs-T2DM	FB_Cluster_6	ENSMUSG00000032410	Xrn1	1.702335784	2.593977178	98	135	0.286	0.459	0.607621022	0.014310477	1	up	Xrn1
Control-vs-T2DM	FB_Cluster_6	ENSMUSG00000040147	Maob	0.782262876	1.180712384	98	135	0.112	0.237	0.593869939	0.014474661	1	up	Maob
Control-vs-T2DM	FB_Cluster_6	ENSMUSG00000000359	Rem1	0.618789644	0.805582665	98	135	0.102	0.2	0.380529534	0.01458184	1	up	Rem1
Control-vs-T2DM	FB_Cluster_6	ENSMUSG00000062127	Cttnbp2nl	0.13012949	0.507227504	98	135	0.031	0.133	1.961861194	0.014607169	1	up	Cttnbp2nl
Control-vs-T2DM	FB_Cluster_6	ENSMUSG00000023460	Rab12	0.790199232	1.160566393	98	135	0.133	0.259	0.554482451	0.014608962	1	up	Rab12
Control-vs-T2DM	FB_Cluster_6	ENSMUSG00000034297	Med13	1.220645744	2.206622049	98	135	0.204	0.378	0.854142176	0.014687915	1	up	Med13
Control-vs-T2DM	FB_Cluster_6	ENSMUSG00000034755	Pcdh11x	0.234130834	2.303449791	98	135	0.041	0.141	3.297855875	0.015194298	1	up	Pcdh11x
Control-vs-T2DM	FB_Cluster_6	ENSMUSG00000001642	Akr1b3	0.297470394	0.65052656	98	135	0.041	0.133	1.128598721	0.015865618	1	up	Akr1b3
Control-vs-T2DM	FB_Cluster_6	ENSMUSG00000034707	Gns	0.55365868	1.256420307	98	135	0.122	0.274	1.182104675	0.016101515	1	up	Gns
Control-vs-T2DM	FB_Cluster_6	ENSMUSG00000045098	Kmt5b	0.91948917	1.34773685	98	135	0.143	0.274	0.551584495	0.016118114	1	up	Kmt5b
Control-vs-T2DM	FB_Cluster_6	ENSMUSG00000024678	Ms4a4d	1.902554127	2.789169567	98	135	0.286	0.459	0.551874043	0.016125927	1	up	Ms4a4d
Control-vs-T2DM	FB_Cluster_6	ENSMUSG00000024897	Apba1	1.75479672	2.548418386	98	135	0.235	0.393	0.538272635	0.016308641	1	up	Apba1
Control-vs-T2DM	FB_Cluster_6	ENSMUSG00000015501	Hivep2	2.491041773	3.476200885	98	135	0.327	0.496	0.480745829	0.016326288	1	up	Hivep2
Control-vs-T2DM	FB_Cluster_6	ENSMUSG00000057522	Spop	0.974716289	1.856104199	98	135	0.194	0.363	0.929153166	0.017438153	1	up	Spop
Control-vs-T2DM	FB_Cluster_6	ENSMUSG00000021377	Dek	0.581680996	0.989448271	98	135	0.092	0.207	0.766293913	0.017702159	1	up	Dek
Control-vs-T2DM	FB_Cluster_6	ENSMUSG00000031904	Slc7a6	0.175690832	0.573582496	98	135	0.041	0.148	1.706392666	0.017864444	1	up	Slc7a6
Control-vs-T2DM	FB_Cluster_6	ENSMUSG00000058594	Fbh1	0.085058847	0.575146683	98	135	0.02	0.111	2.755952436	0.018121468	1	up	Fbh1
Control-vs-T2DM	FB_Cluster_6	ENSMUSG00000022338	Eny2	0.479572355	0.73037789	98	135	0.071	0.163	0.606791313	0.018370018	1	up	Eny2
Control-vs-T2DM	FB_Cluster_6	ENSMUSG00000087484	2900089D17Rik	0.086969058	0.489694009	98	135	0.02	0.111	2.49194311	0.018435753	1	up	2900089D17Rik
Control-vs-T2DM	FB_Cluster_6	ENSMUSG00000062078	Qk	3.174100266	4.123465125	98	135	0.429	0.607	0.37749904	0.01849539	1	up	Qk
Control-vs-T2DM	FB_Cluster_6	ENSMUSG00000021171	Esyt2	1.636769136	2.502179139	98	135	0.245	0.407	0.61230375	0.018697247	1	up	Esyt2
Control-vs-T2DM	FB_Cluster_6	ENSMUSG00000031214	Ophn1	0.675622289	1.449466795	98	135	0.122	0.267	1.101119466	0.019337994	1	up	Ophn1
Control-vs-T2DM	FB_Cluster_6	ENSMUSG00000037211	Spry1	0.265288879	0.690092525	98	135	0.041	0.141	1.378890935	0.019606234	1	up	Spry1
Control-vs-T2DM	FB_Cluster_6	ENSMUSG00000075595	Zfp652	0.57710628	1.236362589	98	135	0.112	0.252	1.099059687	0.019730302	1	up	Zfp652
Control-vs-T2DM	FB_Cluster_6	ENSMUSG00000049744	Arhgap15	0.253584037	1.076815162	98	135	0.041	0.148	2.085799953	0.01978724	1	up	Arhgap15
Control-vs-T2DM	FB_Cluster_6	ENSMUSG00000045658	Pid1	5.095775561	8.540038522	98	135	0.49	0.667	0.744929423	0.020679114	1	up	Pid1
Control-vs-T2DM	FB_Cluster_6	ENSMUSG00000001472	Tcf25	1.257247216	2.302065469	98	135	0.224	0.393	0.872608427	0.022504403	1	up	Tcf25
Control-vs-T2DM	FB_Cluster_6	ENSMUSG00000022761	Lztr1	0.108885926	0.388885215	98	135	0.02	0.104	1.835573481	0.023072605	1	up	Lztr1
Control-vs-T2DM	FB_Cluster_6	ENSMUSG00000014503	Pkd2l2	0.056549458	0.426765308	98	135	0.02	0.104	2.913646852	0.02318411	1	up	Pkd2l2
Control-vs-T2DM	FB_Cluster_6	ENSMUSG00000024277	Mapre2	0.611177421	0.921075452	98	135	0.102	0.2	0.591648686	0.023430381	1	up	Mapre2
Control-vs-T2DM	FB_Cluster_6	ENSMUSG00000001855	Nup214	0.359171945	0.657247134	98	135	0.071	0.17	0.871579153	0.024307136	1	up	Nup214
Control-vs-T2DM	FB_Cluster_6	ENSMUSG00000048332	Lhfp	9.390037447	14.03288637	98	135	0.755	0.785	0.579603882	0.02461738	1	up	Lhfp
Control-vs-T2DM	FB_Cluster_6	ENSMUSG00000037709	Fam13a	0.203608977	0.867383481	98	135	0.031	0.126	2.090326725	0.024886065	1	up	Fam13a
Control-vs-T2DM	FB_Cluster_6	ENSMUSG00000069729	Arid1b	2.111997354	3.493744408	98	135	0.327	0.504	0.726139027	0.025051335	1	up	Arid1b
Control-vs-T2DM	FB_Cluster_6	ENSMUSG00000039456	Morc3	0.49696093	0.770084976	98	135	0.082	0.185	0.631782271	0.025338527	1	up	Morc3
Control-vs-T2DM	FB_Cluster_6	ENSMUSG00000027977	Ndst3	0.359351067	0.734392337	98	135	0.041	0.133	1.030952052	0.0260376	1	up	Ndst3
Control-vs-T2DM	FB_Cluster_6	ENSMUSG00000004633	Chn2	0.20321316	0.500573732	98	135	0.031	0.111	1.300167166	0.026151545	1	up	Chn2
Control-vs-T2DM	FB_Cluster_6	ENSMUSG00000055239	Kcmf1	0.72806534	1.370486024	98	135	0.133	0.274	0.912454904	0.026779379	1	up	Kcmf1
Control-vs-T2DM	FB_Cluster_6	ENSMUSG00000025278	Flnb	0.164050899	0.733256221	98	135	0.041	0.141	2.159491496	0.027073627	1	up	Flnb
Control-vs-T2DM	FB_Cluster_6	ENSMUSG00000100053	Gm28154	0.380183298	1.076102362	98	135	0.051	0.156	1.500802896	0.027941009	1	up	Gm28154
Control-vs-T2DM	FB_Cluster_6	ENSMUSG00000031197	Vbp1	0.091980432	0.457537029	98	135	0.02	0.104	2.313237292	0.028585006	1	up	Vbp1
Control-vs-T2DM	FB_Cluster_6	ENSMUSG00000044864	Ankrd50	0.092952127	0.440543383	98	135	0.02	0.104	2.243500504	0.028612145	1	up	Ankrd50
Control-vs-T2DM	FB_Cluster_6	ENSMUSG00000038250	Usp38	0.073991584	0.433847006	98	135	0.02	0.104	2.550137284	0.02879715	1	up	Usp38
Control-vs-T2DM	FB_Cluster_6	ENSMUSG00000021555	Naa35	0.101001247	0.550405686	98	135	0.031	0.119	2.44495668	0.02895859	1	up	Naa35
Control-vs-T2DM	FB_Cluster_6	ENSMUSG00000021733	Slc4a7	0.360658595	0.922671637	98	135	0.061	0.17	1.354939895	0.029221288	1	up	Slc4a7
Control-vs-T2DM	FB_Cluster_6	ENSMUSG00000024501	Dpysl3	1.834684629	2.422480688	98	135	0.265	0.415	0.400933992	0.029428471	1	up	Dpysl3
Control-vs-T2DM	FB_Cluster_6	ENSMUSG00000035437	Rabgap1	0.935281987	1.675921662	98	135	0.163	0.311	0.841413244	0.029648492	1	up	Rabgap1
Control-vs-T2DM	FB_Cluster_6	ENSMUSG00000032329	Hmg20a	0.864344456	1.66777143	98	135	0.163	0.311	0.948162908	0.030548146	1	up	Hmg20a
Control-vs-T2DM	FB_Cluster_6	ENSMUSG00000032640	Chsy1	0.445131339	1.159597237	98	135	0.092	0.215	1.381121158	0.033175639	1	up	Chsy1
Control-vs-T2DM	FB_Cluster_6	ENSMUSG00000016481	Cr1l	0.7745573	1.221210711	98	135	0.143	0.267	0.656800156	0.033341191	1	up	Cr1l
Control-vs-T2DM	FB_Cluster_6	ENSMUSG00000035649	Zcchc7	3.676319103	5.738837059	98	135	0.52	0.659	0.642482312	0.033432763	1	up	Zcchc7
Control-vs-T2DM	FB_Cluster_6	ENSMUSG00000074656	Eif2s2	1.033636661	1.639717559	98	135	0.153	0.289	0.665666601	0.033643624	1	up	Eif2s2
Control-vs-T2DM	FB_Cluster_6	ENSMUSG00000062373	Tmem65	1.446343965	2.291250417	98	135	0.255	0.415	0.663687673	0.03368613	1	up	Tmem65
Control-vs-T2DM	FB_Cluster_6	ENSMUSG00000027167	Elp4	0.839085947	1.413975865	98	135	0.143	0.274	0.752797099	0.034097914	1	up	Elp4
Control-vs-T2DM	FB_Cluster_6	ENSMUSG00000028683	Eif2b3	0.301370637	0.867832309	98	135	0.061	0.17	1.525565036	0.035263766	1	up	Eif2b3
Control-vs-T2DM	FB_Cluster_6	ENSMUSG00000062115	Rai1	0.357362013	1.03832512	98	135	0.082	0.2	1.538535347	0.035468723	1	up	Rai1
Control-vs-T2DM	FB_Cluster_6	ENSMUSG00000004530	Coro1c	0.204143802	0.580003944	98	135	0.041	0.133	1.50601913	0.03650889	1	up	Coro1c
Control-vs-T2DM	FB_Cluster_6	ENSMUSG00000031897	Psmb10	0.174841615	0.396219878	98	135	0.031	0.104	1.179791815	0.037022994	1	up	Psmb10
Control-vs-T2DM	FB_Cluster_6	ENSMUSG00000028906	Epb41	0.52020262	0.967280053	98	135	0.092	0.2	0.894731818	0.037163281	1	up	Epb41
Control-vs-T2DM	FB_Cluster_6	ENSMUSG00000018377	Vezf1	0.659541317	1.304945016	98	135	0.143	0.281	0.984345901	0.037264843	1	up	Vezf1
Control-vs-T2DM	FB_Cluster_6	ENSMUSG00000024182	Axin1	0.373470912	0.803179588	98	135	0.071	0.178	1.104520092	0.0373168	1	up	Axin1
Control-vs-T2DM	FB_Cluster_6	ENSMUSG00000086370	Ftx	0.734174755	1.188894539	98	135	0.133	0.252	0.695350184	0.037660505	1	up	Ftx
Control-vs-T2DM	FB_Cluster_6	ENSMUSG00000040097	Flywch1	0.137928917	0.607443558	98	135	0.031	0.119	2.138017307	0.037756651	1	up	Flywch1
Control-vs-T2DM	FB_Cluster_6	ENSMUSG00000032744	Heyl	0.143142013	0.574964151	98	135	0.031	0.119	2.005268204	0.037940521	1	up	Heyl
Control-vs-T2DM	FB_Cluster_6	ENSMUSG00000025630	Hprt	0.285638409	0.402799825	98	135	0.041	0.104	0.495726203	0.038818226	1	up	Hprt
Control-vs-T2DM	FB_Cluster_6	ENSMUSG00000021103	Mnat1	0.601942128	1.030486238	98	135	0.092	0.2	0.775528885	0.039336972	1	up	Mnat1
Control-vs-T2DM	FB_Cluster_6	ENSMUSG00000001323	Srr	0.484359209	0.928516836	98	135	0.071	0.17	0.938708238	0.040516357	1	up	Srr
Control-vs-T2DM	FB_Cluster_6	ENSMUSG00000021687	Scamp1	0.226739631	0.697843514	98	135	0.041	0.133	1.621437569	0.040978632	1	up	Scamp1
Control-vs-T2DM	FB_Cluster_6	ENSMUSG00000060147	Serpinb6a	1.719380274	2.434503011	98	135	0.265	0.422	0.501713979	0.041271567	1	up	Serpinb6a
Control-vs-T2DM	FB_Cluster_6	ENSMUSG00000044150	Bclaf3	0.376227653	0.612008584	98	135	0.061	0.141	0.701798295	0.042037185	1	up	Bclaf3
Control-vs-T2DM	FB_Cluster_6	ENSMUSG00000019806	Aig1	0.505202531	0.728745044	98	135	0.082	0.163	0.528464717	0.042425077	1	up	Aig1
Control-vs-T2DM	FB_Cluster_6	ENSMUSG00000018672	Copz2	0.33228206	0.755337549	98	135	0.071	0.178	1.184469978	0.04302821	1	up	Copz2
Control-vs-T2DM	FB_Cluster_6	ENSMUSG00000029238	Clock	1.123413192	1.969878858	98	135	0.214	0.363	0.810163081	0.044422055	1	up	Clock
Control-vs-T2DM	FB_Cluster_6	ENSMUSG00000027660	Skil	1.174006522	1.781889343	98	135	0.173	0.304	0.601925405	0.044941508	1	up	Skil
Control-vs-T2DM	FB_Cluster_6	ENSMUSG00000020521	Rnft1	0.251565928	0.564771516	98	135	0.051	0.141	1.166412846	0.045547475	1	up	Rnft1
Control-vs-T2DM	FB_Cluster_6	ENSMUSG00000032741	Tpcn1	0.436529495	0.674502311	98	135	0.071	0.156	0.62762767	0.046043784	1	up	Tpcn1
Control-vs-T2DM	FB_Cluster_6	ENSMUSG00000034473	Sec22a	0.30647033	0.799637018	98	135	0.061	0.163	1.383307589	0.046623088	1	up	Sec22a
Control-vs-T2DM	FB_Cluster_6	ENSMUSG00000028522	Mier1	1.356437618	1.979603976	98	135	0.245	0.393	0.545355665	0.046907062	1	up	Mier1
Control-vs-T2DM	FB_Cluster_6	ENSMUSG00000030096	Slc6a6	0.325138861	0.8176314	98	135	0.061	0.163	1.33012739	0.047621926	1	up	Slc6a6
Control-vs-T2DM	FB_Cluster_6	ENSMUSG00000036138	Acaa1a	0.265722548	0.610923142	98	135	0.051	0.141	1.200763535	0.047938013	1	up	Acaa1a
Control-vs-T2DM	FB_Cluster_6	ENSMUSG00000038564	Ift172	0.292280046	0.450748203	98	135	0.051	0.126	0.624796914	0.047980334	1	up	Ift172
Control-vs-T2DM	FB_Cluster_6	ENSMUSG00000025135	Anapc11	0.234966491	0.690852629	98	135	0.051	0.148	1.55551791	0.048245744	1	up	Anapc11
Control-vs-T2DM	FB_Cluster_6	ENSMUSG00000068663	Clec16a	0.227227089	0.404690051	98	135	0.041	0.111	0.832404224	0.048707264	1	up	Clec16a
Control-vs-T2DM	FB_Cluster_7	ENSMUSG00000032570	Atp2c1	0.596082064	1.629746452	108	44	0.148	0.477	1.450911177	8.52E-05	1	up	Atp2c1
Control-vs-T2DM	FB_Cluster_7	ENSMUSG00000032860	P2ry2	0	0.430442977	108	44	0	0.136	12.07194154	0.000154391	1	up	P2ry2
Control-vs-T2DM	FB_Cluster_7	ENSMUSG00000078606	Gm4070	0	0.370946064	108	44	0	0.136	11.85738259	0.000154391	1	up	Gm4070
Control-vs-T2DM	FB_Cluster_7	ENSMUSG00000060882	Kcnd2	0	0.416603238	108	44	0	0.136	12.0248046	0.000154391	1	up	Kcnd2
Control-vs-T2DM	FB_Cluster_7	ENSMUSG00000030729	Pgm2l1	0	0.3928616	108	44	0	0.136	11.94017262	0.000154391	1	up	Pgm2l1
Control-vs-T2DM	FB_Cluster_7	ENSMUSG00000038500	Prr3	0	0.440766109	108	44	0	0.136	12.10612486	0.000154391	1	up	Prr3
Control-vs-T2DM	FB_Cluster_7	ENSMUSG00000020224	Llph	0.189971512	0.751117408	108	44	0.037	0.25	1.982688177	0.000239669	1	up	Llph
Control-vs-T2DM	FB_Cluster_7	ENSMUSG00000028978	Nos3	0.569283128	1.443016617	108	44	0.12	0.386	1.341716239	0.000454661	1	up	Nos3
Control-vs-T2DM	FB_Cluster_7	ENSMUSG00000055435	Maf	0.020403833	0.666684599	108	44	0.009	0.182	5.023255268	0.000459353	1	up	Maf
Control-vs-T2DM	FB_Cluster_7	ENSMUSG00000047246	H2bc6	0.027189133	0.958149673	108	44	0.009	0.182	5.134003134	0.000473562	1	up	H2bc6
Control-vs-T2DM	FB_Cluster_7	ENSMUSG00000039414	Heatr5b	0.066014366	0.534643205	108	44	0.019	0.205	3.01581056	0.000568681	1	up	Heatr5b
Control-vs-T2DM	FB_Cluster_7	ENSMUSG00000052593	Adam17	0.612735189	1.169623991	108	44	0.13	0.364	0.932597106	0.000603536	1	up	Adam17
Control-vs-T2DM	FB_Cluster_7	ENSMUSG00000027257	Pacsin3	0	0.453802999	108	44	0	0.114	12.1481683	0.000626455	1	up	Pacsin3
Control-vs-T2DM	FB_Cluster_7	ENSMUSG00000017652	Cd40	0	0.363926534	108	44	0	0.114	11.8298279	0.000626455	1	up	Cd40
Control-vs-T2DM	FB_Cluster_7	ENSMUSG00000037190	Cyb561d2	0	0.281009643	108	44	0	0.114	11.45691723	0.000626455	1	up	Cyb561d2
Control-vs-T2DM	FB_Cluster_7	ENSMUSG00000019813	Cep57l1	0	0.34906569	108	44	0	0.114	11.76969609	0.000626455	1	up	Cep57l1
Control-vs-T2DM	FB_Cluster_7	ENSMUSG00000054823	Nsd3	2.344591414	3.867603511	108	44	0.361	0.682	0.722079144	0.000649629	1	up	Nsd3
Control-vs-T2DM	FB_Cluster_7	ENSMUSG00000022505	Emp2	0.624775781	1.286363101	108	44	0.111	0.341	1.041768748	0.000781416	1	up	Emp2
Control-vs-T2DM	FB_Cluster_7	ENSMUSG00000039737	Prkrip1	0.102142959	0.360938799	108	44	0.009	0.136	1.820152385	0.00098045	1	up	Prkrip1
Control-vs-T2DM	FB_Cluster_7	ENSMUSG00000016477	E2f3	0.206173457	0.822329028	108	44	0.037	0.227	1.995332996	0.001182471	1	up	E2f3
Control-vs-T2DM	FB_Cluster_7	ENSMUSG00000038914	Dido1	0.775844693	1.244191698	108	44	0.13	0.341	0.681299004	0.001227115	1	up	Dido1
Control-vs-T2DM	FB_Cluster_7	ENSMUSG00000073131	Vma21	0.271505607	0.808111425	108	44	0.046	0.227	1.573219481	0.001848762	1	up	Vma21
Control-vs-T2DM	FB_Cluster_7	ENSMUSG00000050945	Zfp438	0.262878458	0.621620761	108	44	0.037	0.182	1.241322128	0.001891095	1	up	Zfp438
Control-vs-T2DM	FB_Cluster_7	ENSMUSG00000037795	N4bp2	0.160182018	1.124626494	108	44	0.046	0.25	2.810889731	0.001902115	1	up	N4bp2
Control-vs-T2DM	FB_Cluster_7	ENSMUSG00000097392	Thoc2l	0.654066381	0.944018497	108	44	0.102	0.25	0.529310326	0.002062567	1	up	Thoc2l
Control-vs-T2DM	FB_Cluster_7	ENSMUSG00000059552	Trp53	0.104847874	0.704946645	108	44	0.037	0.227	2.748045765	0.002324906	1	up	Trp53
Control-vs-T2DM	FB_Cluster_7	ENSMUSG00000042520	Ubap2l	1.501200376	2.052807732	108	44	0.269	0.5	0.451456131	0.002498214	1	up	Ubap2l
Control-vs-T2DM	FB_Cluster_7	ENSMUSG00000069769	Msi2	1.425668272	2.286963145	108	44	0.278	0.545	0.681756676	0.002515183	1	up	Msi2
Control-vs-T2DM	FB_Cluster_7	ENSMUSG00000022466	Rpap3	0.125245015	0.938610241	108	44	0.028	0.205	2.904775279	0.002562565	1	up	Rpap3
Control-vs-T2DM	FB_Cluster_7	ENSMUSG00000079111	Kdelr2	1.338056398	1.772631016	108	44	0.25	0.455	0.405726904	0.002696032	1	up	Kdelr2
Control-vs-T2DM	FB_Cluster_7	ENSMUSG00000062519	Zfp398	0.265996269	0.972784053	108	44	0.065	0.273	1.870319592	0.002715538	1	up	Zfp398
Control-vs-T2DM	FB_Cluster_7	ENSMUSG00000036298	Slc2a13	0.131929602	0.748213306	108	44	0.009	0.136	2.502780995	0.002720712	1	up	Slc2a13
Control-vs-T2DM	FB_Cluster_7	ENSMUSG00000026434	Nucks1	0.418062181	1.276327055	108	44	0.102	0.341	1.609976598	0.0027618	1	up	Nucks1
Control-vs-T2DM	FB_Cluster_7	ENSMUSG00000025239	Limd1	0.525809834	0.986730438	108	44	0.093	0.273	0.907986741	0.003101774	1	up	Limd1
Control-vs-T2DM	FB_Cluster_7	ENSMUSG00000019173	Rab5c	0.3849752	0.660048341	108	44	0.074	0.227	0.777650037	0.003142303	1	up	Rab5c
Control-vs-T2DM	FB_Cluster_7	ENSMUSG00000049751	Rpl36al	0.742274843	1.243020757	108	44	0.139	0.341	0.743746719	0.003737337	1	up	Rpl36al
Control-vs-T2DM	FB_Cluster_7	ENSMUSG00000046768	Rhoj	5.559901887	11.82980311	108	44	0.667	0.818	1.08928098	0.004280539	1	up	Rhoj
Control-vs-T2DM	FB_Cluster_7	ENSMUSG00000074364	Ehd2	1.072513114	1.478364857	108	44	0.204	0.386	0.462970155	0.004577529	1	up	Ehd2
Control-vs-T2DM	FB_Cluster_7	ENSMUSG00000096433	Zfp994	0.043696363	0.446397494	108	44	0.009	0.136	3.349769114	0.005234858	1	up	Zfp994
Control-vs-T2DM	FB_Cluster_7	ENSMUSG00000021891	Mettl6	0.048382805	0.56418642	108	44	0.009	0.136	3.540882564	0.005522464	1	up	Mettl6
Control-vs-T2DM	FB_Cluster_7	ENSMUSG00000072620	Slfn2	0.20390014	0.9687067	108	44	0.046	0.227	2.2476387	0.005710754	1	up	Slfn2
Control-vs-T2DM	FB_Cluster_7	ENSMUSG00000025372	Baiap2	0.320016967	0.758054523	108	44	0.056	0.205	1.243892774	0.00580937	1	up	Baiap2
Control-vs-T2DM	FB_Cluster_7	ENSMUSG00000020580	Rock2	2.899058821	5.218403901	108	44	0.5	0.773	0.848001889	0.006068437	1	up	Rock2
Control-vs-T2DM	FB_Cluster_7	ENSMUSG00000020889	Nr1d1	0.092170313	0.583210266	108	44	0.019	0.159	2.660325002	0.006088435	1	up	Nr1d1
Control-vs-T2DM	FB_Cluster_7	ENSMUSG00000042804	Gpr153	0.265501827	0.797674908	108	44	0.056	0.227	1.586716677	0.006173588	1	up	Gpr153
Control-vs-T2DM	FB_Cluster_7	ENSMUSG00000004535	Tax1bp1	1.17740986	2.671243496	108	44	0.231	0.5	1.181826357	0.006192266	1	up	Tax1bp1
Control-vs-T2DM	FB_Cluster_7	ENSMUSG00000026771	Spopl	0.776974095	1.209471976	108	44	0.139	0.318	0.638372547	0.006356404	1	up	Spopl
Control-vs-T2DM	FB_Cluster_7	ENSMUSG00000021427	Ssr1	0.925024178	1.193611634	108	44	0.148	0.318	0.367735431	0.00640701	1	up	Ssr1
Control-vs-T2DM	FB_Cluster_7	ENSMUSG00000048170	Mcmbp	0.32425543	0.785678413	108	44	0.074	0.25	1.276546945	0.006412757	1	up	Mcmbp
Control-vs-T2DM	FB_Cluster_7	ENSMUSG00000007739	Cct4	0.368903912	0.803641073	108	44	0.093	0.273	1.123094696	0.006423857	1	up	Cct4
Control-vs-T2DM	FB_Cluster_7	ENSMUSG00000003534	Ddr1	0.119392256	0.672195149	108	44	0.028	0.182	2.492177614	0.00663407	1	up	Ddr1
Control-vs-T2DM	FB_Cluster_7	ENSMUSG00000028641	P3h1	0.329721043	0.5918402	108	44	0.065	0.205	0.843767991	0.006716097	1	up	P3h1
Control-vs-T2DM	FB_Cluster_7	ENSMUSG00000038187	Btbd10	0.378952566	0.572497824	108	44	0.074	0.205	0.595124256	0.006764012	1	up	Btbd10
Control-vs-T2DM	FB_Cluster_7	ENSMUSG00000002885	Adgre5	0.820080154	1.199413905	108	44	0.167	0.341	0.548437141	0.006779952	1	up	Adgre5
Control-vs-T2DM	FB_Cluster_7	ENSMUSG00000024639	Gnaq	2.235858046	4.185801379	108	44	0.38	0.659	0.904645203	0.007016047	1	up	Gnaq
Control-vs-T2DM	FB_Cluster_7	ENSMUSG00000077450	Rab11b	0.688918236	1.287141064	108	44	0.139	0.341	0.901668184	0.007172923	1	up	Rab11b
Control-vs-T2DM	FB_Cluster_7	ENSMUSG00000022089	Bin3	0.08676603	0.701374323	108	44	0.019	0.159	3.013526284	0.007337037	1	up	Bin3
Control-vs-T2DM	FB_Cluster_7	ENSMUSG00000019988	Nedd1	0.112078958	0.757828015	108	44	0.028	0.182	2.756258741	0.007568832	1	up	Nedd1
Control-vs-T2DM	FB_Cluster_7	ENSMUSG00000009995	Taz	0.487470871	0.706147671	108	44	0.093	0.227	0.534562266	0.007690626	1	up	Taz
Control-vs-T2DM	FB_Cluster_7	ENSMUSG00000003660	Snrnp200	0.389819623	0.815431009	108	44	0.074	0.227	1.064562971	0.007855272	1	up	Snrnp200
Control-vs-T2DM	FB_Cluster_7	ENSMUSG00000028163	Nfkb1	1.659519987	2.61535765	108	44	0.278	0.523	0.656210472	0.007972097	1	up	Nfkb1
Control-vs-T2DM	FB_Cluster_7	ENSMUSG00000028381	Ugcg	0.283993077	1.135437754	108	44	0.065	0.25	1.998940094	0.009749383	1	up	Ugcg
Control-vs-T2DM	FB_Cluster_7	ENSMUSG00000020230	Prmt2	0.073603015	0.394876045	108	44	0.009	0.114	2.42196962	0.010285149	1	up	Prmt2
Control-vs-T2DM	FB_Cluster_7	ENSMUSG00000050812	Ecpas	1.782273227	2.831358737	108	44	0.315	0.568	0.667746039	0.010341887	1	up	Ecpas
Control-vs-T2DM	FB_Cluster_7	ENSMUSG00000027170	Eif3m	0.398746679	1.142321954	108	44	0.083	0.273	1.518189437	0.010408923	1	up	Eif3m
Control-vs-T2DM	FB_Cluster_7	ENSMUSG00000038039	Gcc2	1.017267012	1.41496555	108	44	0.167	0.318	0.476028664	0.01050637	1	up	Gcc2
Control-vs-T2DM	FB_Cluster_7	ENSMUSG00000039275	Foxk2	0.333159908	0.960549594	108	44	0.074	0.25	1.527362523	0.010513825	1	up	Foxk2
Control-vs-T2DM	FB_Cluster_7	ENSMUSG00000014850	Msh3	0.421013956	0.704440912	108	44	0.093	0.25	0.742472795	0.010552591	1	up	Msh3
Control-vs-T2DM	FB_Cluster_7	ENSMUSG00000034612	Chst11	0.265091023	0.928091801	108	44	0.046	0.205	1.807391012	0.010649583	1	up	Chst11
Control-vs-T2DM	FB_Cluster_7	ENSMUSG00000034560	Washc4	0.581844768	1.543088991	108	44	0.111	0.318	1.406960617	0.01145409	1	up	Washc4
Control-vs-T2DM	FB_Cluster_7	ENSMUSG00000097997	Gm27017	0.269916444	0.418792729	108	44	0.046	0.159	0.63353357	0.011510365	1	up	Gm27017
Control-vs-T2DM	FB_Cluster_7	ENSMUSG00000024045	Akap8	0.540227238	0.930541249	108	44	0.13	0.295	0.784391724	0.011545746	1	up	Akap8
Control-vs-T2DM	FB_Cluster_7	ENSMUSG00000087413	Gm11266	0.293265267	0.742235907	108	44	0.056	0.205	1.339374083	0.011630462	1	up	Gm11266
Control-vs-T2DM	FB_Cluster_7	ENSMUSG00000042331	Specc1	0.101155036	0.429094858	108	44	0.019	0.136	2.083639129	0.011785578	1	up	Specc1
Control-vs-T2DM	FB_Cluster_7	ENSMUSG00000033685	Ucp2	0.104362053	0.447877797	108	44	0.019	0.136	2.100448262	0.011805062	1	up	Ucp2
Control-vs-T2DM	FB_Cluster_7	ENSMUSG00000041921	Metap1d	0.413449994	0.569639133	108	44	0.083	0.205	0.462239755	0.011807151	1	up	Metap1d
Control-vs-T2DM	FB_Cluster_7	ENSMUSG00000029221	Slc30a9	0.919142869	1.287501125	108	44	0.157	0.318	0.486167758	0.012006212	1	up	Slc30a9
Control-vs-T2DM	FB_Cluster_7	ENSMUSG00000053929	Cyhr1	0.444516154	1.140896561	108	44	0.102	0.295	1.359662172	0.012378666	1	up	Cyhr1
Control-vs-T2DM	FB_Cluster_7	ENSMUSG00000032096	Arcn1	0.820971945	1.387159317	108	44	0.148	0.341	0.756656946	0.012634661	1	up	Arcn1
Control-vs-T2DM	FB_Cluster_7	ENSMUSG00000018986	Slfn3	0.063659397	0.395866629	108	44	0.009	0.114	2.634668965	0.012667886	1	up	Slfn3
Control-vs-T2DM	FB_Cluster_7	ENSMUSG00000024251	Thada	1.299756171	1.879362847	108	44	0.231	0.432	0.531968398	0.012849947	1	up	Thada
Control-vs-T2DM	FB_Cluster_7	ENSMUSG00000061079	Zfp143	0.235619507	0.516724748	108	44	0.037	0.159	1.132604	0.012953763	1	up	Zfp143
Control-vs-T2DM	FB_Cluster_7	ENSMUSG00000015790	Surf1	0.044334495	0.279082735	108	44	0.009	0.114	2.651457733	0.013136271	1	up	Surf1
Control-vs-T2DM	FB_Cluster_7	ENSMUSG00000038668	Lpar1	1.823356665	3.122137548	108	44	0.306	0.545	0.775904391	0.013209381	1	up	Lpar1
Control-vs-T2DM	FB_Cluster_7	ENSMUSG00000033953	Ppp3r1	0.297709451	0.777011151	108	44	0.065	0.227	1.383731424	0.01376568	1	up	Ppp3r1
Control-vs-T2DM	FB_Cluster_7	ENSMUSG00000040363	Bcor	0.197941067	0.822651694	108	44	0.046	0.205	2.05465746	0.014003059	1	up	Bcor
Control-vs-T2DM	FB_Cluster_7	ENSMUSG00000078427	Sarnp	1.00497113	1.976332492	108	44	0.204	0.409	0.975601072	0.014342713	1	up	Sarnp
Control-vs-T2DM	FB_Cluster_7	ENSMUSG00000079179	Rab10os	0.237775166	0.412957659	108	44	0.046	0.159	0.796138521	0.014682166	1	up	Rab10os
Control-vs-T2DM	FB_Cluster_7	ENSMUSG00000017291	Taok1	1.957669998	2.527738625	108	44	0.361	0.568	0.368693081	0.01492594	1	up	Taok1
Control-vs-T2DM	FB_Cluster_7	ENSMUSG00000027782	Kpna4	1.983876121	2.91785768	108	44	0.333	0.568	0.556564298	0.015009521	1	up	Kpna4
Control-vs-T2DM	FB_Cluster_7	ENSMUSG00000039286	Fndc3b	3.543817024	6.705245363	108	44	0.574	0.773	0.919966816	0.015048093	1	up	Fndc3b
Control-vs-T2DM	FB_Cluster_7	ENSMUSG00000051391	Ywhag	0.553174382	0.992731272	108	44	0.111	0.273	0.843553432	0.015056242	1	up	Ywhag
Control-vs-T2DM	FB_Cluster_7	ENSMUSG00000027933	Ints3	0.277766589	1.19233516	108	44	0.074	0.25	2.10144654	0.01524998	1	up	Ints3
Control-vs-T2DM	FB_Cluster_7	ENSMUSG00000036957	Lrfn3	0.072614425	0.350671116	108	44	0.019	0.136	2.27021645	0.015308417	1	up	Lrfn3
Control-vs-T2DM	FB_Cluster_7	ENSMUSG00000021264	Yy1	0.858440126	1.195758408	108	44	0.167	0.341	0.478089112	0.015550177	1	up	Yy1
Control-vs-T2DM	FB_Cluster_7	ENSMUSG00000006390	Elovl1	0.337972993	0.809205641	108	44	0.083	0.25	1.25934988	0.015914794	1	up	Elovl1
Control-vs-T2DM	FB_Cluster_7	ENSMUSG00000037519	Ppfia1	0.458494188	0.58982922	108	44	0.093	0.205	0.363323798	0.016082858	1	up	Ppfia1
Control-vs-T2DM	FB_Cluster_7	ENSMUSG00000056305	Usp39	0.036410772	0.281460941	108	44	0.009	0.114	2.947053143	0.016097119	1	up	Usp39
Control-vs-T2DM	FB_Cluster_7	ENSMUSG00000006058	Snf8	0.227652787	0.613578163	108	44	0.056	0.205	1.430013536	0.01612822	1	up	Snf8
Control-vs-T2DM	FB_Cluster_7	ENSMUSG00000035620	Ric8b	0.459968249	1.236756268	108	44	0.102	0.295	1.426758058	0.016279039	1	up	Ric8b
Control-vs-T2DM	FB_Cluster_7	ENSMUSG00000039262	Prrc2b	0.775840174	1.688554628	108	44	0.167	0.386	1.121856964	0.016316906	1	up	Prrc2b
Control-vs-T2DM	FB_Cluster_7	ENSMUSG00000001910	Nacc1	0.2061024	0.401714427	108	44	0.046	0.159	0.962468243	0.016811858	1	up	Nacc1
Control-vs-T2DM	FB_Cluster_7	ENSMUSG00000054716	Zfp771	0.086158472	0.441949425	108	44	0.019	0.136	2.357469613	0.016813976	1	up	Zfp771
Control-vs-T2DM	FB_Cluster_7	ENSMUSG00000054493	Gm9947	0.094027581	0.461648132	108	44	0.019	0.136	2.294416707	0.016915353	1	up	Gm9947
Control-vs-T2DM	FB_Cluster_7	ENSMUSG00000069135	Fgfr1op	0.046587468	0.409860663	108	44	0.009	0.114	3.134378233	0.01708789	1	up	Fgfr1op
Control-vs-T2DM	FB_Cluster_7	ENSMUSG00000047554	Tmem41b	0.187725429	0.494585165	108	44	0.037	0.159	1.397118233	0.017295354	1	up	Tmem41b
Control-vs-T2DM	FB_Cluster_7	ENSMUSG00000087497	2810001G20Rik	0.056875057	0.516958456	108	44	0.009	0.114	3.181925028	0.01733819	1	up	2810001G20Rik
Control-vs-T2DM	FB_Cluster_7	ENSMUSG00000012017	Scarf2	0.328942549	0.834279415	108	44	0.083	0.25	1.342429413	0.017492838	1	up	Scarf2
Control-vs-T2DM	FB_Cluster_7	ENSMUSG00000025193	Cutc	0.112814464	0.642285955	108	44	0.019	0.136	2.508210043	0.017600475	1	up	Cutc
Control-vs-T2DM	FB_Cluster_7	ENSMUSG00000032745	Gpbp1	0.408635295	1.259312673	108	44	0.102	0.295	1.623512356	0.017606663	1	up	Gpbp1
Control-vs-T2DM	FB_Cluster_7	ENSMUSG00000019866	Crybg1	0.033039284	0.294246963	108	44	0.009	0.114	3.150903417	0.017645988	1	up	Crybg1
Control-vs-T2DM	FB_Cluster_7	ENSMUSG00000019715	Gle1	0.441462508	0.953619007	108	44	0.102	0.273	1.110946589	0.018123489	1	up	Gle1
Control-vs-T2DM	FB_Cluster_7	ENSMUSG00000031979	Cog2	0.134264207	0.641044229	108	44	0.037	0.182	2.25450006	0.018170428	1	up	Cog2
Control-vs-T2DM	FB_Cluster_7	ENSMUSG00000062619	2310039H08Rik	0.177759475	0.443538018	108	44	0.037	0.159	1.318645173	0.018312708	1	up	2310039H08Rik
Control-vs-T2DM	FB_Cluster_7	ENSMUSG00000041638	Gcn1	0.147652776	0.824122361	108	44	0.037	0.182	2.479848365	0.018394379	1	up	Gcn1
Control-vs-T2DM	FB_Cluster_7	ENSMUSG00000022453	Naga	0.031275998	0.303042497	108	44	0.009	0.114	3.272262855	0.018410302	1	up	Naga
Control-vs-T2DM	FB_Cluster_7	ENSMUSG00000068040	Tm9sf4	0.697519237	1.211524238	108	44	0.13	0.295	0.796430617	0.018438448	1	up	Tm9sf4
Control-vs-T2DM	FB_Cluster_7	ENSMUSG00000003099	Ppp5c	0.112696102	0.577651534	108	44	0.019	0.136	2.356731974	0.018532419	1	up	Ppp5c
Control-vs-T2DM	FB_Cluster_7	ENSMUSG00000023008	Fmnl3	0.594832253	0.994442149	108	44	0.093	0.25	0.741307121	0.018600676	1	up	Fmnl3
Control-vs-T2DM	FB_Cluster_7	ENSMUSG00000023845	Lnpep	2.094099298	3.909955424	108	44	0.389	0.614	0.900790312	0.018762241	1	up	Lnpep
Control-vs-T2DM	FB_Cluster_7	ENSMUSG00000069917	Hba-a2	0.052179539	0.604529657	108	44	0.009	0.114	3.53173341	0.018813322	1	up	Hba-a2
Control-vs-T2DM	FB_Cluster_7	ENSMUSG00000021501	Caml	0.356622677	0.692535895	108	44	0.083	0.227	0.957294224	0.018827173	1	up	Caml
Control-vs-T2DM	FB_Cluster_7	ENSMUSG00000072772	Grcc10	0.07468748	0.411628238	108	44	0.019	0.136	2.46082372	0.018856199	1	up	Grcc10
Control-vs-T2DM	FB_Cluster_7	ENSMUSG00000045257	Morn2	0.024334453	0.265481062	108	44	0.009	0.114	3.442163576	0.019142864	1	up	Morn2
Control-vs-T2DM	FB_Cluster_7	ENSMUSG00000026781	Acbd5	0.502207716	1.056557276	108	44	0.083	0.227	1.072864176	0.019152875	1	up	Acbd5
Control-vs-T2DM	FB_Cluster_7	ENSMUSG00000030815	Phkg2	0.024334453	0.279655752	108	44	0.009	0.114	3.517179098	0.01928278	1	up	Phkg2
Control-vs-T2DM	FB_Cluster_7	ENSMUSG00000000148	Brat1	0.034192242	0.425797634	108	44	0.009	0.114	3.63455256	0.019319983	1	up	Brat1
Control-vs-T2DM	FB_Cluster_7	ENSMUSG00000098557	Kctd12	0.105397624	0.517997947	108	44	0.028	0.159	2.296014364	0.019520422	1	up	Kctd12
Control-vs-T2DM	FB_Cluster_7	ENSMUSG00000032316	Clk3	0.233002344	0.580265043	108	44	0.046	0.182	1.315997114	0.019613062	1	up	Clk3
Control-vs-T2DM	FB_Cluster_7	ENSMUSG00000030835	Nomo1	0.165446956	0.477455994	108	44	0.046	0.182	1.528429422	0.019937212	1	up	Nomo1
Control-vs-T2DM	FB_Cluster_7	ENSMUSG00000055660	Mettl4	0.130596966	0.324532344	108	44	0.019	0.114	1.312581097	0.020072863	1	up	Mettl4
Control-vs-T2DM	FB_Cluster_7	ENSMUSG00000030282	Cmas	0.103766726	0.531080548	108	44	0.028	0.159	2.354468752	0.020155573	1	up	Cmas
Control-vs-T2DM	FB_Cluster_7	ENSMUSG00000115082	Gm49189	0.131222573	0.352811463	108	44	0.028	0.136	1.426191373	0.020194861	1	up	Gm49189
Control-vs-T2DM	FB_Cluster_7	ENSMUSG00000101636	4930579H20Rik	0.071250596	0.461899514	108	44	0.019	0.136	2.694893953	0.020432365	1	up	4930579H20Rik
Control-vs-T2DM	FB_Cluster_7	ENSMUSG00000022994	Adcy6	0.443120839	0.602160639	108	44	0.093	0.205	0.442362261	0.020690017	1	up	Adcy6
Control-vs-T2DM	FB_Cluster_7	ENSMUSG00000000732	Icosl	0.229880456	0.673946841	108	44	0.056	0.205	1.551337585	0.020755765	1	up	Icosl
Control-vs-T2DM	FB_Cluster_7	ENSMUSG00000020280	Pus10	0.093703682	0.574860344	108	44	0.028	0.159	2.61574599	0.020839508	1	up	Pus10
Control-vs-T2DM	FB_Cluster_7	ENSMUSG00000023307	Marchf5	0.590790842	0.894665643	108	44	0.102	0.227	0.598618222	0.020876917	1	up	Marchf5
Control-vs-T2DM	FB_Cluster_7	ENSMUSG00000021708	Rasgrf2	0.885346972	1.501258115	108	44	0.176	0.364	0.761790327	0.021177283	1	up	Rasgrf2
Control-vs-T2DM	FB_Cluster_7	ENSMUSG00000048120	Entpd1	0.398077165	1.717904184	108	44	0.093	0.273	2.109251159	0.021240199	1	up	Entpd1
Control-vs-T2DM	FB_Cluster_7	ENSMUSG00000032030	Cul5	0.73420227	1.350649027	108	44	0.157	0.341	0.879313677	0.021737731	1	up	Cul5
Control-vs-T2DM	FB_Cluster_7	ENSMUSG00000024908	Ppp6r3	0.917790012	1.748062548	108	44	0.194	0.409	0.929446141	0.021789316	1	up	Ppp6r3
Control-vs-T2DM	FB_Cluster_7	ENSMUSG00000046010	Zfp830	0.05428676	0.392612552	108	44	0.019	0.136	2.852146312	0.021813508	1	up	Zfp830
Control-vs-T2DM	FB_Cluster_7	ENSMUSG00000032688	Malt1	0.436499302	0.869559567	108	44	0.074	0.227	0.994140937	0.021925047	1	up	Malt1
Control-vs-T2DM	FB_Cluster_7	ENSMUSG00000055302	Mrfap1	0.980513828	1.416031366	108	44	0.194	0.364	0.530198091	0.022071842	1	up	Mrfap1
Control-vs-T2DM	FB_Cluster_7	ENSMUSG00000037754	Ppp1r16b	0.238839288	0.683256331	108	44	0.046	0.182	1.515993965	0.022799282	1	up	Ppp1r16b
Control-vs-T2DM	FB_Cluster_7	ENSMUSG00000022220	Adcy4	0.273823561	1.01028357	108	44	0.065	0.227	1.883057817	0.0232326	1	up	Adcy4
Control-vs-T2DM	FB_Cluster_7	ENSMUSG00000039704	Lmbrd2	0.354305965	0.492262553	108	44	0.074	0.182	0.474318155	0.024231176	1	up	Lmbrd2
Control-vs-T2DM	FB_Cluster_7	ENSMUSG00000027882	Stxbp3	0.519409838	0.849585547	108	44	0.111	0.25	0.709777953	0.024913339	1	up	Stxbp3
Control-vs-T2DM	FB_Cluster_7	ENSMUSG00000073792	Alg6	0.201149686	0.419164907	108	44	0.046	0.159	1.058875544	0.025662638	1	up	Alg6
Control-vs-T2DM	FB_Cluster_7	ENSMUSG00000024991	Eif3a	1.039794955	2.534630473	108	44	0.241	0.432	1.285394547	0.026289447	1	up	Eif3a
Control-vs-T2DM	FB_Cluster_7	ENSMUSG00000013663	Pten	1.842611883	3.428352327	108	44	0.343	0.568	0.895726945	0.026508717	1	up	Pten
Control-vs-T2DM	FB_Cluster_7	ENSMUSG00000048758	Rpl29	1.350027789	1.883721833	108	44	0.204	0.364	0.480566561	0.026513157	1	up	Rpl29
Control-vs-T2DM	FB_Cluster_7	ENSMUSG00000071757	Zhx2	0.645385863	1.771934036	108	44	0.148	0.341	1.456948911	0.027971417	1	up	Zhx2
Control-vs-T2DM	FB_Cluster_7	ENSMUSG00000017264	Exosc10	0.282006671	0.523878524	108	44	0.046	0.159	0.893266901	0.028284832	1	up	Exosc10
Control-vs-T2DM	FB_Cluster_7	ENSMUSG00000024135	Srbd1	0.467794312	1.044359876	108	44	0.102	0.273	1.158502474	0.028554715	1	up	Srbd1
Control-vs-T2DM	FB_Cluster_7	ENSMUSG00000025917	Cops5	0.229525689	0.85677535	108	44	0.056	0.205	1.899801301	0.028814578	1	up	Cops5
Control-vs-T2DM	FB_Cluster_7	ENSMUSG00000033379	Atp6v0b	2.395953019	3.215455873	108	44	0.454	0.659	0.424408325	0.028897263	1	up	Atp6v0b
Control-vs-T2DM	FB_Cluster_7	ENSMUSG00000005886	Ncoa2	1.634816159	3.129366897	108	44	0.315	0.545	0.936700262	0.029225948	1	up	Ncoa2
Control-vs-T2DM	FB_Cluster_7	ENSMUSG00000040606	Kazn	0.213824203	0.709495257	108	44	0.046	0.182	1.729896648	0.03050296	1	up	Kazn
Control-vs-T2DM	FB_Cluster_7	ENSMUSG00000030315	Vgll4	0.785226923	1.29202789	108	44	0.167	0.341	0.718383607	0.030984002	1	up	Vgll4
Control-vs-T2DM	FB_Cluster_7	ENSMUSG00000034789	Rab24	0.226041193	0.557292107	108	44	0.065	0.205	1.301468763	0.031184862	1	up	Rab24
Control-vs-T2DM	FB_Cluster_7	ENSMUSG00000035245	Eogt	0.2058723	0.493699443	108	44	0.056	0.182	1.26147488	0.03212116	1	up	Eogt
Control-vs-T2DM	FB_Cluster_7	ENSMUSG00000057858	Fam204a	0.38079316	0.791008762	108	44	0.074	0.205	1.054489671	0.03218665	1	up	Fam204a
Control-vs-T2DM	FB_Cluster_7	ENSMUSG00000035473	Galm	0.175267168	0.583673615	108	44	0.037	0.159	1.735030331	0.03223646	1	up	Galm
Control-vs-T2DM	FB_Cluster_7	ENSMUSG00000052928	Ctif	0.605340946	1.036239215	108	44	0.12	0.273	0.775438151	0.032415174	1	up	Ctif
Control-vs-T2DM	FB_Cluster_7	ENSMUSG00000033060	Lmo7	0.650870408	1.098851195	108	44	0.139	0.295	0.75546345	0.03305455	1	up	Lmo7
Control-vs-T2DM	FB_Cluster_7	ENSMUSG00000085784	Gm12158	0.115089482	0.378318685	108	44	0.028	0.136	1.715974341	0.033479228	1	up	Gm12158
Control-vs-T2DM	FB_Cluster_7	ENSMUSG00000022528	Hes1	0.594347671	1.101195187	108	44	0.102	0.25	0.889579494	0.034728734	1	up	Hes1
Control-vs-T2DM	FB_Cluster_7	ENSMUSG00000067365	Tmem128	0.288832965	0.413430036	108	44	0.065	0.159	0.517257305	0.035368398	1	up	Tmem128
Control-vs-T2DM	FB_Cluster_7	ENSMUSG00000031217	Efnb1	0.167191498	0.643390846	108	44	0.046	0.182	1.943555495	0.035615029	1	up	Efnb1
Control-vs-T2DM	FB_Cluster_7	ENSMUSG00000053565	Eif3k	0.507021186	0.762774197	108	44	0.083	0.205	0.589114618	0.035643059	1	up	Eif3k
Control-vs-T2DM	FB_Cluster_7	ENSMUSG00000002279	Lmf1	0.121160225	0.409025075	108	44	0.028	0.136	1.75443556	0.035720439	1	up	Lmf1
Control-vs-T2DM	FB_Cluster_7	ENSMUSG00000021420	Fars2	0.497008623	1.427240917	108	44	0.12	0.295	1.521696925	0.03609252	1	up	Fars2
Control-vs-T2DM	FB_Cluster_7	ENSMUSG00000039000	Ube3c	0.918942368	1.471910079	108	44	0.194	0.364	0.679584273	0.03629071	1	up	Ube3c
Control-vs-T2DM	FB_Cluster_7	ENSMUSG00000035873	Pawr	0.209067176	0.785429088	108	44	0.046	0.182	1.909008225	0.037106611	1	up	Pawr
Control-vs-T2DM	FB_Cluster_7	ENSMUSG00000023156	Rpp14	0.103611977	0.384300475	108	44	0.019	0.114	1.890027607	0.037309592	1	up	Rpp14
Control-vs-T2DM	FB_Cluster_7	ENSMUSG00000025511	Tspan4	0.235721971	0.420886451	108	44	0.056	0.159	0.836075665	0.038210672	1	up	Tspan4
Control-vs-T2DM	FB_Cluster_7	ENSMUSG00000041303	Gtf3c3	0.177369268	0.385535094	108	44	0.037	0.136	1.119667125	0.03866539	1	up	Gtf3c3
Control-vs-T2DM	FB_Cluster_7	ENSMUSG00000114937	Gm30054	0.241207721	0.457553015	108	44	0.037	0.136	0.923380104	0.038674956	1	up	Gm30054
Control-vs-T2DM	FB_Cluster_7	ENSMUSG00000067377	Tspan6	0.092826877	0.349807441	108	44	0.019	0.114	1.912805525	0.039020468	1	up	Tspan6
Control-vs-T2DM	FB_Cluster_7	ENSMUSG00000026021	Sumo1	1.303999872	1.682021018	108	44	0.213	0.364	0.367227143	0.039278819	1	up	Sumo1
Control-vs-T2DM	FB_Cluster_7	ENSMUSG00000027109	Sp3	1.06079691	1.57116586	108	44	0.185	0.341	0.566642834	0.039647247	1	up	Sp3
Control-vs-T2DM	FB_Cluster_7	ENSMUSG00000030850	Ate1	0.32759008	0.925008897	108	44	0.074	0.227	1.497291199	0.039712196	1	up	Ate1
Control-vs-T2DM	FB_Cluster_7	ENSMUSG00000028796	Phc2	0.281797303	0.92064933	108	44	0.074	0.227	1.707638768	0.040245793	1	up	Phc2
Control-vs-T2DM	FB_Cluster_7	ENSMUSG00000042229	Rabif	0.106514731	0.330495402	108	44	0.028	0.136	1.632659865	0.040769561	1	up	Rabif
Control-vs-T2DM	FB_Cluster_7	ENSMUSG00000020288	Ahsa2	0.280630587	0.385797459	108	44	0.065	0.159	0.459031284	0.040978158	1	up	Ahsa2
Control-vs-T2DM	FB_Cluster_7	ENSMUSG00000024887	Asah2	0.162200255	0.628932382	108	44	0.037	0.159	1.954469021	0.041476136	1	up	Asah2
Control-vs-T2DM	FB_Cluster_7	ENSMUSG00000042487	Leo1	0.093584339	0.36094291	108	44	0.019	0.114	1.946290505	0.041692593	1	up	Leo1
Control-vs-T2DM	FB_Cluster_7	ENSMUSG00000034845	Plvap	0.211089898	1.65646516	108	44	0.046	0.159	2.971582219	0.041763166	1	up	Plvap
Control-vs-T2DM	FB_Cluster_7	ENSMUSG00000033417	Cacul1	0.476834047	0.980877321	108	44	0.083	0.227	1.040430008	0.042011183	1	up	Cacul1
Control-vs-T2DM	FB_Cluster_7	ENSMUSG00000027206	Cops2	0.367565717	0.793070125	108	44	0.074	0.205	1.10923568	0.042229167	1	up	Cops2
Control-vs-T2DM	FB_Cluster_7	ENSMUSG00000046556	Zfp319	0.110249602	0.417069771	108	44	0.019	0.114	1.918553188	0.043270853	1	up	Zfp319
Control-vs-T2DM	FB_Cluster_7	ENSMUSG00000001909	Trmt1	0.358562952	0.53493194	108	44	0.074	0.182	0.576996286	0.0432746	1	up	Trmt1
Control-vs-T2DM	FB_Cluster_7	ENSMUSG00000027739	Rab33b	0.150600853	0.583266279	108	44	0.037	0.159	1.952714408	0.043293456	1	up	Rab33b
Control-vs-T2DM	FB_Cluster_7	ENSMUSG00000097415	AU020206	0.170220879	0.671397892	108	44	0.037	0.159	1.979127571	0.043468397	1	up	AU020206
Control-vs-T2DM	FB_Cluster_7	ENSMUSG00000116004	Gm49539	0.540995086	1.345502245	108	44	0.12	0.295	1.314297972	0.043658316	1	up	Gm49539
Control-vs-T2DM	FB_Cluster_7	ENSMUSG00000036890	Gtdc1	0.573065403	1.646544941	108	44	0.12	0.295	1.522506073	0.043680785	1	up	Gtdc1
Control-vs-T2DM	FB_Cluster_7	ENSMUSG00000026219	Trip12	1.890061451	2.892328573	108	44	0.333	0.545	0.613771864	0.043692537	1	up	Trip12
Control-vs-T2DM	FB_Cluster_7	ENSMUSG00000022982	Sod1	0.348688157	0.596816021	108	44	0.083	0.205	0.77517692	0.043915676	1	up	Sod1
Control-vs-T2DM	FB_Cluster_7	ENSMUSG00000002844	Adprh	0.434043158	0.794122591	108	44	0.093	0.227	0.871372551	0.044435081	1	up	Adprh
Control-vs-T2DM	FB_Cluster_7	ENSMUSG00000022893	Adamts1	1.098409285	1.736240536	108	44	0.185	0.364	0.660502857	0.044561272	1	up	Adamts1
Control-vs-T2DM	FB_Cluster_7	ENSMUSG00000040652	Oaz2	0.248790009	0.621656418	108	44	0.056	0.182	1.320841174	0.045128237	1	up	Oaz2
Control-vs-T2DM	FB_Cluster_7	ENSMUSG00000038013	Wipf2	0.149244832	0.629879176	108	44	0.037	0.159	2.076656829	0.045315563	1	up	Wipf2
Control-vs-T2DM	FB_Cluster_7	ENSMUSG00000050619	Zscan29	0.190331768	0.273026055	108	44	0.037	0.114	0.520292772	0.04553686	1	up	Zscan29
Control-vs-T2DM	FB_Cluster_7	ENSMUSG00000029174	Tbc1d1	0.412328372	0.925887085	108	44	0.083	0.227	1.166848488	0.04569047	1	up	Tbc1d1
Control-vs-T2DM	FB_Cluster_7	ENSMUSG00000037958	Nsrp1	0.122464322	0.607915231	108	44	0.037	0.159	2.310568385	0.045692198	1	up	Nsrp1
Control-vs-T2DM	FB_Cluster_7	ENSMUSG00000037253	Mex3c	0.448510646	0.740308438	108	44	0.083	0.205	0.722857478	0.04582923	1	up	Mex3c
Control-vs-T2DM	FB_Cluster_7	ENSMUSG00000046152	Fut10	0.139947179	0.620197093	108	44	0.037	0.159	2.147046439	0.045952915	1	up	Fut10
Control-vs-T2DM	FB_Cluster_7	ENSMUSG00000044786	Zfp36	0.278791037	0.367793272	108	44	0.056	0.136	0.399585724	0.046102323	1	up	Zfp36
Control-vs-T2DM	FB_Cluster_7	ENSMUSG00000034075	Zdhhc5	0.127414472	0.516080969	108	44	0.028	0.136	2.017215961	0.046244429	1	up	Zdhhc5
Control-vs-T2DM	FB_Cluster_7	ENSMUSG00000022440	C1qtnf6	0.081875039	0.342231912	108	44	0.019	0.114	2.062139193	0.046530714	1	up	C1qtnf6
Control-vs-T2DM	FB_Cluster_7	ENSMUSG00000032596	Uba7	0.124114089	0.473027238	108	44	0.028	0.136	1.929399402	0.046686182	1	up	Uba7
Control-vs-T2DM	FB_Cluster_7	ENSMUSG00000055917	Zfp277	0.310453989	0.628161363	108	44	0.065	0.182	1.016520761	0.046793629	1	up	Zfp277
Control-vs-T2DM	FB_Cluster_7	ENSMUSG00000038976	Ppp1r9b	0.243673052	0.49247518	108	44	0.037	0.136	1.014805282	0.046897903	1	up	Ppp1r9b
Control-vs-T2DM	FB_Cluster_7	ENSMUSG00000041408	Wapl	1.406414425	2.09586737	108	44	0.287	0.477	0.575491909	0.047043365	1	up	Wapl
Control-vs-T2DM	FB_Cluster_7	ENSMUSG00000042010	Acacb	0.492711264	0.695835665	108	44	0.093	0.205	0.497918712	0.047389289	1	up	Acacb
Control-vs-T2DM	FB_Cluster_7	ENSMUSG00000023830	Igf2r	4.359006112	6.710739625	108	44	0.611	0.705	0.622460957	0.047965256	1	up	Igf2r
Control-vs-T2DM	FB_Cluster_7	ENSMUSG00000024772	Ehd1	0.341115674	0.919449006	108	44	0.093	0.25	1.430242544	0.048015746	1	up	Ehd1
Control-vs-T2DM	FB_Cluster_7	ENSMUSG00000028478	Clta	0.516780145	0.868216824	108	44	0.093	0.227	0.748391753	0.048380002	1	up	Clta
Control-vs-T2DM	FB_Cluster_7	ENSMUSG00000033430	Terf2ip	0.063867515	0.27750154	108	44	0.019	0.114	2.117604227	0.048813588	1	up	Terf2ip
Control-vs-T2DM	FB_Cluster_7	ENSMUSG00000022540	Rogdi	0.213356258	0.405344385	108	44	0.028	0.114	0.925563572	0.049074864	1	up	Rogdi
Control-vs-T2DM	FB_Cluster_7	ENSMUSG00000003500	Impdh1	0.116982462	0.505551396	108	44	0.028	0.136	2.110618121	0.049145415	1	up	Impdh1
Control-vs-T2DM	FB_Cluster_8	ENSMUSG00000022667	Cd200r1	0	0.625876463	69	56	0	0.125	12.6118927	0.001047079	1	up	Cd200r1
Control-vs-T2DM	FB_Cluster_8	ENSMUSG00000039357	Fut11	0	0.468967647	69	56	0	0.125	12.19558028	0.001047079	1	up	Fut11
Control-vs-T2DM	FB_Cluster_8	ENSMUSG00000112308	Gm48512	0	0.603340171	69	56	0	0.107	12.55899502	0.002644274	1	up	Gm48512
Control-vs-T2DM	FB_Cluster_8	ENSMUSG00000042500	Ago4	0	0.553523306	69	56	0	0.107	12.43468896	0.002644274	1	up	Ago4
Control-vs-T2DM	FB_Cluster_8	ENSMUSG00000037601	Nme1	0	0.457668528	69	56	0	0.107	12.16040256	0.002644274	1	up	Nme1
Control-vs-T2DM	FB_Cluster_8	ENSMUSG00000002006	Pdzd4	0	0.573839279	69	56	0	0.107	12.4866824	0.002644274	1	up	Pdzd4
Control-vs-T2DM	FB_Cluster_8	ENSMUSG00000029624	Ptcd1	0	0.49891284	69	56	0	0.107	12.28486122	0.002644274	1	up	Ptcd1
Control-vs-T2DM	FB_Cluster_8	ENSMUSG00000029576	Radil	0	0.48133958	69	56	0	0.107	12.23313904	0.002644274	1	up	Radil
Control-vs-T2DM	FB_Cluster_8	ENSMUSG00000063506	Arhgap22	0	0.443959016	69	56	0	0.107	12.11653571	0.002644274	1	up	Arhgap22
Control-vs-T2DM	FB_Cluster_8	ENSMUSG00000066613	Zfp932	0	0.441021573	69	56	0	0.107	12.1069606	0.002644274	1	up	Zfp932
Control-vs-T2DM	FB_Cluster_8	ENSMUSG00000027593	Raly	0	0.414017816	69	56	0	0.107	12.01582555	0.002644274	1	up	Raly
Control-vs-T2DM	FB_Cluster_8	ENSMUSG00000020515	Cnot8	0	0.351786234	69	56	0	0.107	11.78089336	0.002644274	1	up	Cnot8
Control-vs-T2DM	FB_Cluster_8	ENSMUSG00000021552	Gkap1	0.424357954	2.07875744	69	56	0.072	0.304	2.292097271	0.002843998	1	up	Gkap1
Control-vs-T2DM	FB_Cluster_8	ENSMUSG00000005621	Zfp592	0.180726186	0.855676926	69	56	0.029	0.196	2.242631165	0.005296818	1	up	Zfp592
Control-vs-T2DM	FB_Cluster_8	ENSMUSG00000021466	Ptch1	0.04039792	0.783496003	69	56	0.014	0.161	4.274190338	0.00642041	1	up	Ptch1
Control-vs-T2DM	FB_Cluster_8	ENSMUSG00000021244	Ylpm1	0.88861853	1.599302885	69	56	0.13	0.339	0.84773492	0.008785521	1	up	Ylpm1
Control-vs-T2DM	FB_Cluster_8	ENSMUSG00000039047	Pigk	0.409239197	1.413386812	69	56	0.072	0.268	1.787889696	0.009825059	1	up	Pigk
Control-vs-T2DM	FB_Cluster_8	ENSMUSG00000036257	Pnpla8	0.710368764	1.860384016	69	56	0.145	0.375	1.388834869	0.011696181	1	up	Pnpla8
Control-vs-T2DM	FB_Cluster_8	ENSMUSG00000041594	Tmtc4	0.268721259	0.618721091	69	56	0.043	0.179	1.202875133	0.012302528	1	up	Tmtc4
Control-vs-T2DM	FB_Cluster_8	ENSMUSG00000025862	Stag2	1.062168356	2.617606758	69	56	0.159	0.393	1.301155219	0.012496064	1	up	Stag2
Control-vs-T2DM	FB_Cluster_8	ENSMUSG00000032594	Ip6k1	0.082442461	0.732445646	69	56	0.029	0.179	3.149710293	0.012558643	1	up	Ip6k1
Control-vs-T2DM	FB_Cluster_8	ENSMUSG00000036867	Smad6	0.47204044	2.130463613	69	56	0.101	0.304	2.173947162	0.012655772	1	up	Smad6
Control-vs-T2DM	FB_Cluster_8	ENSMUSG00000032527	Pccb	0.042044542	0.806334688	69	56	0.014	0.143	4.258139986	0.013176428	1	up	Pccb
Control-vs-T2DM	FB_Cluster_8	ENSMUSG00000034842	Art3	0.502577256	1.681774587	69	56	0.087	0.286	1.742365811	0.013990631	1	up	Art3
Control-vs-T2DM	FB_Cluster_8	ENSMUSG00000004937	Sgta	0.075997659	0.535903141	69	56	0.014	0.143	2.816317472	0.014339657	1	up	Sgta
Control-vs-T2DM	FB_Cluster_8	ENSMUSG00000056234	Ncoa4	0.140781796	0.734586607	69	56	0.029	0.179	2.382643773	0.014452874	1	up	Ncoa4
Control-vs-T2DM	FB_Cluster_8	ENSMUSG00000046447	Camk2n1	0.456964814	0.86247713	69	56	0.058	0.196	0.916254705	0.014493129	1	up	Camk2n1
Control-vs-T2DM	FB_Cluster_8	ENSMUSG00000058638	Zfp110	0.051649158	0.745078052	69	56	0.014	0.143	3.8479779	0.014821408	1	up	Zfp110
Control-vs-T2DM	FB_Cluster_8	ENSMUSG00000059923	Grb2	0.123385482	0.853516787	69	56	0.029	0.179	2.789247112	0.015270748	1	up	Grb2
Control-vs-T2DM	FB_Cluster_8	ENSMUSG00000031333	Abcb7	0.050976974	0.497239814	69	56	0.014	0.143	3.283486975	0.016612537	1	up	Abcb7
Control-vs-T2DM	FB_Cluster_8	ENSMUSG00000066037	Hnrnpr	1.127420895	1.627114867	69	56	0.188	0.375	0.529250597	0.02023999	1	up	Hnrnpr
Control-vs-T2DM	FB_Cluster_8	ENSMUSG00000070738	Dgkd	0.168009141	0.630084455	69	56	0.029	0.161	1.906375996	0.021018584	1	up	Dgkd
Control-vs-T2DM	FB_Cluster_8	ENSMUSG00000051586	Mical3	0.872188567	1.820110442	69	56	0.174	0.393	1.061227871	0.021724749	1	up	Mical3
Control-vs-T2DM	FB_Cluster_8	ENSMUSG00000042210	Abhd14a	0.177133148	0.979242008	69	56	0.043	0.196	2.466164315	0.021915156	1	up	Abhd14a
Control-vs-T2DM	FB_Cluster_8	ENSMUSG00000053110	Yap1	0.614993668	0.922906651	69	56	0.101	0.232	0.585534919	0.023557594	1	up	Yap1
Control-vs-T2DM	FB_Cluster_8	ENSMUSG00000048832	Vps37c	0.097038859	0.513624023	69	56	0.014	0.125	2.40287309	0.026664528	1	up	Vps37c
Control-vs-T2DM	FB_Cluster_8	ENSMUSG00000030249	Abcc9	0.708824008	1.749569395	69	56	0.116	0.304	1.303379453	0.026860835	1	up	Abcc9
Control-vs-T2DM	FB_Cluster_8	ENSMUSG00000030138	Bms1	0.163823129	0.715097275	69	56	0.029	0.161	2.125321807	0.027940087	1	up	Bms1
Control-vs-T2DM	FB_Cluster_8	ENSMUSG00000030222	Rerg	0.806286942	1.195129441	69	56	0.101	0.232	0.567743409	0.028205661	1	up	Rerg
Control-vs-T2DM	FB_Cluster_8	ENSMUSG00000038936	Sccpdh	0.04039792	0.586545744	69	56	0.014	0.125	3.856569871	0.028415061	1	up	Sccpdh
Control-vs-T2DM	FB_Cluster_8	ENSMUSG00000039841	Zfp800	0.117293075	0.795433655	69	56	0.029	0.161	2.760575657	0.028919406	1	up	Zfp800
Control-vs-T2DM	FB_Cluster_8	ENSMUSG00000024084	Qpct	0.278520851	0.794161141	69	56	0.043	0.179	1.511310192	0.029222797	1	up	Qpct
Control-vs-T2DM	FB_Cluster_8	ENSMUSG00000048222	Mfap1b	0.091813453	0.551423154	69	56	0.014	0.125	2.585073504	0.029668489	1	up	Mfap1b
Control-vs-T2DM	FB_Cluster_8	ENSMUSG00000030286	Emc3	0.083507656	0.516351249	69	56	0.014	0.125	2.626925218	0.030654955	1	up	Emc3
Control-vs-T2DM	FB_Cluster_8	ENSMUSG00000028552	Eps15	2.068486204	4.084116968	69	56	0.333	0.554	0.98141443	0.030797556	1	up	Eps15
Control-vs-T2DM	FB_Cluster_8	ENSMUSG00000079286	Gm11084	0.111492153	0.707182202	69	56	0.029	0.161	2.664050372	0.030808749	1	up	Gm11084
Control-vs-T2DM	FB_Cluster_8	ENSMUSG00000025894	Aasdhppt	0.037589816	0.485912655	69	56	0.014	0.125	3.688747217	0.031798714	1	up	Aasdhppt
Control-vs-T2DM	FB_Cluster_8	ENSMUSG00000021395	Spin1	0.276817767	1.060165801	69	56	0.058	0.214	1.93689646	0.032004537	1	up	Spin1
Control-vs-T2DM	FB_Cluster_8	ENSMUSG00000021669	Col4a3bp	0.487611011	1.540040153	69	56	0.101	0.268	1.658963194	0.032843269	1	up	Col4a3bp
Control-vs-T2DM	FB_Cluster_8	ENSMUSG00000029622	Arpc1b	0.660555711	1.939167542	69	56	0.13	0.321	1.553541315	0.033712316	1	up	Arpc1b
Control-vs-T2DM	FB_Cluster_8	ENSMUSG00000021242	Npc2	0.677169398	2.021387949	69	56	0.145	0.339	1.577615887	0.034006039	1	up	Npc2
Control-vs-T2DM	FB_Cluster_8	ENSMUSG00000002546	Golga2	0.073251219	0.576018706	69	56	0.014	0.125	2.973473261	0.034382219	1	up	Golga2
Control-vs-T2DM	FB_Cluster_8	ENSMUSG00000018750	Zbtb4	0.508704059	1.216807262	69	56	0.087	0.25	1.258037141	0.03454781	1	up	Zbtb4
Control-vs-T2DM	FB_Cluster_8	ENSMUSG00000020873	Slc35b1	0.062875287	0.688419127	69	56	0.014	0.125	3.45063904	0.034651691	1	up	Slc35b1
Control-vs-T2DM	FB_Cluster_8	ENSMUSG00000070003	Ssbp4	0.060893923	0.674030042	69	56	0.014	0.125	3.466289509	0.034681319	1	up	Ssbp4
Control-vs-T2DM	FB_Cluster_8	ENSMUSG00000036781	Rps27l	0.375142563	0.969967965	69	56	0.058	0.196	1.370262352	0.034758293	1	up	Rps27l
Control-vs-T2DM	FB_Cluster_8	ENSMUSG00000025993	Slc40a1	0.064772083	0.740833711	69	56	0.014	0.125	3.513674802	0.034852902	1	up	Slc40a1
Control-vs-T2DM	FB_Cluster_8	ENSMUSG00000027006	Dnajc10	0.800796564	2.365338254	69	56	0.159	0.321	1.562419667	0.035139222	1	up	Dnajc10
Control-vs-T2DM	FB_Cluster_8	ENSMUSG00000021592	Arsk	0.428147736	0.558525258	69	56	0.029	0.125	0.383435185	0.039620038	1	up	Arsk
Control-vs-T2DM	FB_Cluster_8	ENSMUSG00000052915	Msl1	0.170536706	0.973631453	69	56	0.043	0.179	2.512595924	0.042642917	1	up	Msl1
Control-vs-T2DM	FB_Cluster_8	ENSMUSG00000024810	Il33	0.302106956	2.408190108	69	56	0.058	0.196	2.99440042	0.043812564	1	up	Il33
Control-vs-T2DM	FB_Cluster_8	ENSMUSG00000042745	Id1	0.454736245	0.868586816	69	56	0.072	0.196	0.933488916	0.045341949	1	up	Id1
Control-vs-T2DM	FB_Cluster_8	ENSMUSG00000025509	Pnpla2	0.304576437	0.845812792	69	56	0.058	0.196	1.47323101	0.048212892	1	up	Pnpla2
Control-vs-T2DM	FB_Cluster_8	ENSMUSG00000042133	Ppig	0.48074138	1.370218392	69	56	0.101	0.268	1.510878181	0.049185614	1	up	Ppig
Control-vs-T2DM	FB_Cluster_9	ENSMUSG00000028268	Gbp3	0	1.026983702	46	78	0	0.256	13.32626614	9.28E-06	0.282926777	up	Gbp3
Control-vs-T2DM	FB_Cluster_9	ENSMUSG00000046879	Irgm1	0	1.20486494	46	78	0	0.231	13.55670355	3.06E-05	0.93171521	up	Irgm1
Control-vs-T2DM	FB_Cluster_9	ENSMUSG00000018899	Irf1	0.076492366	1.391568527	46	78	0.022	0.282	4.183471209	0.000262041	1	up	Irf1
Control-vs-T2DM	FB_Cluster_9	ENSMUSG00000020638	Cmpk2	0	1.013426983	46	78	0	0.179	13.30709688	0.000308528	1	up	Cmpk2
Control-vs-T2DM	FB_Cluster_9	ENSMUSG00000074151	Nlrc5	0	0.951817688	46	78	0	0.179	13.21662111	0.000308528	1	up	Nlrc5
Control-vs-T2DM	FB_Cluster_9	ENSMUSG00000033004	Mycbp2	4.008251237	7.547478754	46	78	0.565	0.872	0.913004973	0.000488077	1	up	Mycbp2
Control-vs-T2DM	FB_Cluster_9	ENSMUSG00000029468	P2rx7	0	0.65558828	46	78	0	0.167	12.67879439	0.00054277	1	up	P2rx7
Control-vs-T2DM	FB_Cluster_9	ENSMUSG00000037503	Fam168b	0.266777833	0.740407622	46	78	0.043	0.244	1.472335105	0.000712488	1	up	Fam168b
Control-vs-T2DM	FB_Cluster_9	ENSMUSG00000092157	Gm17268	3.354121036	14.28142551	46	78	0.196	0.5	2.090100425	0.001402503	1	up	Gm17268
Control-vs-T2DM	FB_Cluster_9	ENSMUSG00000057596	Trim30d	0.18356876	0.960707192	46	78	0.022	0.218	2.387140687	0.001540427	1	up	Trim30d
Control-vs-T2DM	FB_Cluster_9	ENSMUSG00000035208	Slfn8	0.404505585	1.774986899	46	78	0.065	0.321	2.133301515	0.001801521	1	up	Slfn8
Control-vs-T2DM	FB_Cluster_9	ENSMUSG00000034154	Ino80	0.493092326	1.927107086	46	78	0.13	0.41	1.966289345	0.002659918	1	up	Ino80
Control-vs-T2DM	FB_Cluster_9	ENSMUSG00000041438	Utp4	0	0.562221271	46	78	0	0.128	12.45717891	0.002882132	1	up	Utp4
Control-vs-T2DM	FB_Cluster_9	ENSMUSG00000022103	Gfra2	0	0.437465837	46	78	0	0.128	12.09528439	0.002882132	1	up	Gfra2
Control-vs-T2DM	FB_Cluster_9	ENSMUSG00000104985	Gm42917	0	0.521792699	46	78	0	0.128	12.3495375	0.002882132	1	up	Gm42917
Control-vs-T2DM	FB_Cluster_9	ENSMUSG00000071646	Mta2	0	0.5189677	46	78	0	0.128	12.341707	0.002882132	1	up	Mta2
Control-vs-T2DM	FB_Cluster_9	ENSMUSG00000032690	Oas2	0	0.846709892	46	78	0	0.128	13.04782241	0.002882132	1	up	Oas2
Control-vs-T2DM	FB_Cluster_9	ENSMUSG00000069920	B3gnt9	0	0.449857698	46	78	0	0.128	12.13557366	0.002882132	1	up	B3gnt9
Control-vs-T2DM	FB_Cluster_9	ENSMUSG00000021840	Mapk1ip1l	0.136853198	0.718704699	46	78	0.022	0.205	2.391916889	0.002974794	1	up	Mapk1ip1l
Control-vs-T2DM	FB_Cluster_9	ENSMUSG00000040913	Fbxw4	0.107619458	0.982435126	46	78	0.022	0.218	3.189230115	0.003574848	1	up	Fbxw4
Control-vs-T2DM	FB_Cluster_9	ENSMUSG00000059588	Calcrl	1.417431925	2.168218949	46	78	0.196	0.436	0.613195758	0.003784783	1	up	Calcrl
Control-vs-T2DM	FB_Cluster_9	ENSMUSG00000056144	Trim34a	0.261913212	1.044951005	46	78	0.043	0.244	1.995861889	0.004317048	1	up	Trim34a
Control-vs-T2DM	FB_Cluster_9	ENSMUSG00000022750	Klhl22	0.143272558	1.071078088	46	78	0.043	0.256	2.901357539	0.004556064	1	up	Klhl22
Control-vs-T2DM	FB_Cluster_9	ENSMUSG00000070034	Sp110	0.374880569	1.094422905	46	78	0.043	0.244	1.545414403	0.004824892	1	up	Sp110
Control-vs-T2DM	FB_Cluster_9	ENSMUSG00000021431	Snrnp48	0.61967494	1.096386095	46	78	0.109	0.321	0.82307119	0.004992866	1	up	Snrnp48
Control-vs-T2DM	FB_Cluster_9	ENSMUSG00000052914	Cyp2j6	0	0.617857878	46	78	0	0.115	12.59329279	0.004995318	1	up	Cyp2j6
Control-vs-T2DM	FB_Cluster_9	ENSMUSG00000045868	Gvin1	0	0.511412337	46	78	0	0.115	12.32055332	0.004995318	1	up	Gvin1
Control-vs-T2DM	FB_Cluster_9	ENSMUSG00000033460	Armcx1	0	0.478990703	46	78	0	0.115	12.2260831	0.004995318	1	up	Armcx1
Control-vs-T2DM	FB_Cluster_9	ENSMUSG00000113895	Gm48383	0	0.56300216	46	78	0	0.115	12.45918097	0.004995318	1	up	Gm48383
Control-vs-T2DM	FB_Cluster_9	ENSMUSG00000063884	Ptcd3	0	0.511005136	46	78	0	0.115	12.31940437	0.004995318	1	up	Ptcd3
Control-vs-T2DM	FB_Cluster_9	ENSMUSG00000007570	Fance	0	0.412239121	46	78	0	0.115	12.00961563	0.004995318	1	up	Fance
Control-vs-T2DM	FB_Cluster_9	ENSMUSG00000042834	Nrep	0	0.341780571	46	78	0	0.115	11.73927672	0.004995318	1	up	Nrep
Control-vs-T2DM	FB_Cluster_9	ENSMUSG00000060862	Zbtb40	0	0.432751583	46	78	0	0.115	12.07965672	0.004995318	1	up	Zbtb40
Control-vs-T2DM	FB_Cluster_9	ENSMUSG00000030204	Ddx47	0	0.42652037	46	78	0	0.115	12.05873714	0.004995318	1	up	Ddx47
Control-vs-T2DM	FB_Cluster_9	ENSMUSG00000027291	Vps39	0	0.395859495	46	78	0	0.115	11.95113714	0.004995318	1	up	Vps39
Control-vs-T2DM	FB_Cluster_9	ENSMUSG00000025791	Pgm1	0	0.316535978	46	78	0	0.115	11.62860948	0.004995318	1	up	Pgm1
Control-vs-T2DM	FB_Cluster_9	ENSMUSG00000040697	Dnajc16	0	0.455944608	46	78	0	0.115	12.15495923	0.004995318	1	up	Dnajc16
Control-vs-T2DM	FB_Cluster_9	ENSMUSG00000036078	Sigmar1	0	0.394913566	46	78	0	0.115	11.94768648	0.004995318	1	up	Sigmar1
Control-vs-T2DM	FB_Cluster_9	ENSMUSG00000086914	Gm16124	0	0.406365292	46	78	0	0.115	11.98891645	0.004995318	1	up	Gm16124
Control-vs-T2DM	FB_Cluster_9	ENSMUSG00000031948	Kars	0	0.335598623	46	78	0	0.115	11.7129509	0.004995318	1	up	Kars
Control-vs-T2DM	FB_Cluster_9	ENSMUSG00000035385	Ccl2	10.67473261	21.52793649	46	78	0.261	0.551	1.012003294	0.005156556	1	up	Ccl2
Control-vs-T2DM	FB_Cluster_9	ENSMUSG00000025899	Alkbh8	0.058794132	0.764751391	46	78	0.022	0.205	3.698983652	0.005460435	1	up	Alkbh8
Control-vs-T2DM	FB_Cluster_9	ENSMUSG00000030657	Xylt1	0.753592982	1.488736099	46	78	0.087	0.282	0.982136077	0.006707546	1	up	Xylt1
Control-vs-T2DM	FB_Cluster_9	ENSMUSG00000029152	Ociad1	0.107619458	0.682428315	46	78	0.022	0.192	2.663610027	0.007503083	1	up	Ociad1
Control-vs-T2DM	FB_Cluster_9	ENSMUSG00000029911	Ssbp1	0.393582885	0.827585151	46	78	0.065	0.231	1.072048081	0.007757153	1	up	Ssbp1
Control-vs-T2DM	FB_Cluster_9	ENSMUSG00000030107	Usp18	0.276570388	1.779493764	46	78	0.043	0.244	2.685307803	0.007811039	1	up	Usp18
Control-vs-T2DM	FB_Cluster_9	ENSMUSG00000045411	2410002F23Rik	0	0.407898439	46	78	0	0.103	11.99434792	0.008639711	1	up	2410002F23Rik
Control-vs-T2DM	FB_Cluster_9	ENSMUSG00000032184	Lysmd2	0	0.395768397	46	78	0	0.103	11.95080519	0.008639711	1	up	Lysmd2
Control-vs-T2DM	FB_Cluster_9	ENSMUSG00000033596	Rfwd3	0	0.370421062	46	78	0	0.103	11.85533984	0.008639711	1	up	Rfwd3
Control-vs-T2DM	FB_Cluster_9	ENSMUSG00000020691	Mettl2	0	0.499346136	46	78	0	0.103	12.28611338	0.008639711	1	up	Mettl2
Control-vs-T2DM	FB_Cluster_9	ENSMUSG00000048232	Fbxo10	0	0.36115361	46	78	0	0.103	11.81879629	0.008639711	1	up	Fbxo10
Control-vs-T2DM	FB_Cluster_9	ENSMUSG00000020843	Timm22	0	0.317631496	46	78	0	0.103	11.63359239	0.008639711	1	up	Timm22
Control-vs-T2DM	FB_Cluster_9	ENSMUSG00000086014	Gm16095	0	0.33810285	46	78	0	0.103	11.7236731	0.008639711	1	up	Gm16095
Control-vs-T2DM	FB_Cluster_9	ENSMUSG00000047098	Rnf31	0	0.39596843	46	78	0	0.103	11.951534	0.008639711	1	up	Rnf31
Control-vs-T2DM	FB_Cluster_9	ENSMUSG00000037570	Mcrs1	0	0.351502973	46	78	0	0.103	11.77973156	0.008639711	1	up	Mcrs1
Control-vs-T2DM	FB_Cluster_9	ENSMUSG00000029380	Cxcl1	1.226482351	2.581277032	46	78	0.087	0.282	1.073496777	0.008707273	1	up	Cxcl1
Control-vs-T2DM	FB_Cluster_9	ENSMUSG00000050079	Rspry1	0.066227359	0.667437631	46	78	0.022	0.192	3.331173192	0.009604152	1	up	Rspry1
Control-vs-T2DM	FB_Cluster_9	ENSMUSG00000040152	Thbs1	0.721296934	5.178941967	46	78	0.109	0.308	2.843820053	0.010230887	1	up	Thbs1
Control-vs-T2DM	FB_Cluster_9	ENSMUSG00000022125	Cln5	0.265840788	0.458832351	46	78	0.022	0.128	0.787176444	0.011120686	1	up	Cln5
Control-vs-T2DM	FB_Cluster_9	ENSMUSG00000034135	Sik3	1.807323465	2.901415136	46	78	0.326	0.59	0.682871897	0.011528312	1	up	Sik3
Control-vs-T2DM	FB_Cluster_9	ENSMUSG00000028270	Gbp2	0.066227359	1.374700603	46	78	0.022	0.179	4.373474508	0.011951038	1	up	Gbp2
Control-vs-T2DM	FB_Cluster_9	ENSMUSG00000025854	Fam20c	0.161618615	0.877094343	46	78	0.043	0.231	2.439410752	0.012153573	1	up	Fam20c
Control-vs-T2DM	FB_Cluster_9	ENSMUSG00000039529	Atp8b1	1.175242408	1.727171908	46	78	0.196	0.397	0.555414098	0.012657466	1	up	Atp8b1
Control-vs-T2DM	FB_Cluster_9	ENSMUSG00000041827	Oasl1	0.279154163	0.487972177	46	78	0.022	0.128	0.805515724	0.012667858	1	up	Oasl1
Control-vs-T2DM	FB_Cluster_9	ENSMUSG00000033885	Pxk	0.362330861	1.366312256	46	78	0.109	0.321	1.914615109	0.01296239	1	up	Pxk
Control-vs-T2DM	FB_Cluster_9	ENSMUSG00000025612	Bach1	0.054834482	0.645748439	46	78	0.022	0.179	3.555411736	0.013694426	1	up	Bach1
Control-vs-T2DM	FB_Cluster_9	ENSMUSG00000020641	Rsad2	0.721489778	4.634572896	46	78	0.087	0.295	2.683216713	0.014830368	1	up	Rsad2
Control-vs-T2DM	FB_Cluster_9	ENSMUSG00000021277	Traf3	0.255256525	1.057288962	46	78	0.043	0.218	2.049921344	0.015063913	1	up	Traf3
Control-vs-T2DM	FB_Cluster_9	ENSMUSG00000058301	Upf1	0.087675461	0.702711573	46	78	0.022	0.179	3.001248383	0.015267199	1	up	Upf1
Control-vs-T2DM	FB_Cluster_9	ENSMUSG00000004846	Plod3	0.175350921	0.633950583	46	78	0.022	0.154	1.853530419	0.017244373	1	up	Plod3
Control-vs-T2DM	FB_Cluster_9	ENSMUSG00000105504	Gbp5	0.186534626	2.01629573	46	78	0.043	0.218	3.43349023	0.017331543	1	up	Gbp5
Control-vs-T2DM	FB_Cluster_9	ENSMUSG00000038305	Spats2l	0.19696675	0.891179339	46	78	0.043	0.218	2.177193281	0.018714106	1	up	Spats2l
Control-vs-T2DM	FB_Cluster_9	ENSMUSG00000078853	Igtp	0.132920394	0.753658285	46	78	0.022	0.167	2.502454505	0.020010774	1	up	Igtp
Control-vs-T2DM	FB_Cluster_9	ENSMUSG00000021549	Rasa1	1.443923237	1.9326828	46	78	0.239	0.436	0.420585563	0.020022662	1	up	Rasa1
Control-vs-T2DM	FB_Cluster_9	ENSMUSG00000034591	Slc41a2	0.032764326	0.504044014	46	78	0.022	0.154	3.939241601	0.020469012	1	up	Slc41a2
Control-vs-T2DM	FB_Cluster_9	ENSMUSG00000027810	Eif2a	0.039961637	0.557559057	46	78	0.022	0.154	3.799090081	0.023464832	1	up	Eif2a
Control-vs-T2DM	FB_Cluster_9	ENSMUSG00000063317	Usp31	0.067210173	0.612347352	46	78	0.022	0.167	3.185689362	0.023974491	1	up	Usp31
Control-vs-T2DM	FB_Cluster_9	ENSMUSG00000039497	Dse	0.607540238	1.708794992	46	78	0.13	0.346	1.491774435	0.024124201	1	up	Dse
Control-vs-T2DM	FB_Cluster_9	ENSMUSG00000012076	Brms1l	0.246068445	0.741061635	46	78	0.043	0.192	1.59014236	0.024233977	1	up	Brms1l
Control-vs-T2DM	FB_Cluster_9	ENSMUSG00000005615	Pcyt1a	0.121803018	0.753265408	46	78	0.043	0.205	2.627615943	0.02428192	1	up	Pcyt1a
Control-vs-T2DM	FB_Cluster_9	ENSMUSG00000048234	Rnf149	0.079923274	0.746342899	46	78	0.022	0.167	3.221540348	0.024348038	1	up	Rnf149
Control-vs-T2DM	FB_Cluster_9	ENSMUSG00000061130	Ppm1b	0.302499427	0.801751714	46	78	0.065	0.231	1.405926207	0.024904026	1	up	Ppm1b
Control-vs-T2DM	FB_Cluster_9	ENSMUSG00000028656	Cap1	0.420253297	0.600350336	46	78	0.087	0.205	0.514442535	0.027415719	1	up	Cap1
Control-vs-T2DM	FB_Cluster_9	ENSMUSG00000018196	Glrx2	0.054834482	0.735923752	46	78	0.022	0.154	3.743968412	0.027920458	1	up	Glrx2
Control-vs-T2DM	FB_Cluster_9	ENSMUSG00000001424	Snd1	1.297537057	2.441645866	46	78	0.239	0.474	0.912026129	0.028014394	1	up	Snd1
Control-vs-T2DM	FB_Cluster_9	ENSMUSG00000037997	Parp11	0.284184191	1.145603888	46	78	0.065	0.244	2.010828445	0.028455236	1	up	Parp11
Control-vs-T2DM	FB_Cluster_9	ENSMUSG00000027580	Helz2	0.195872544	0.906918621	46	78	0.043	0.205	2.210480623	0.028519232	1	up	Helz2
Control-vs-T2DM	FB_Cluster_9	ENSMUSG00000028195	Ccn1	0.350781844	2.826359074	46	78	0.043	0.205	3.009938602	0.029025591	1	up	Ccn1
Control-vs-T2DM	FB_Cluster_9	ENSMUSG00000021877	Arf4	1.166375166	2.341169837	46	78	0.261	0.5	1.005135626	0.029366073	1	up	Arf4
Control-vs-T2DM	FB_Cluster_9	ENSMUSG00000099401	Gm28375	0.14252831	0.702960548	46	78	0.022	0.154	2.301388576	0.029382489	1	up	Gm28375
Control-vs-T2DM	FB_Cluster_9	ENSMUSG00000020009	Ifngr1	3.18868517	4.48745769	46	78	0.435	0.667	0.49292358	0.029844212	1	up	Ifngr1
Control-vs-T2DM	FB_Cluster_9	ENSMUSG00000023994	Nfya	0.094333393	0.471550747	46	78	0.022	0.154	2.320349939	0.030062774	1	up	Nfya
Control-vs-T2DM	FB_Cluster_9	ENSMUSG00000038366	Lasp1	0.249058172	0.848066102	46	78	0.043	0.192	1.767284931	0.030748931	1	up	Lasp1
Control-vs-T2DM	FB_Cluster_9	ENSMUSG00000066043	Phactr4	0.540081243	1.219841648	46	78	0.087	0.256	1.175296693	0.031329998	1	up	Phactr4
Control-vs-T2DM	FB_Cluster_9	ENSMUSG00000036371	Serbp1	1.282010134	2.241846347	46	78	0.217	0.436	0.806231556	0.032101173	1	up	Serbp1
Control-vs-T2DM	FB_Cluster_9	ENSMUSG00000038014	Fam120a	0.507153691	1.128876345	46	78	0.087	0.256	1.154235894	0.032309004	1	up	Fam120a
Control-vs-T2DM	FB_Cluster_9	ENSMUSG00000032925	Itgbl1	2.099873773	4.780825312	46	78	0.37	0.474	1.186918558	0.032513562	1	up	Itgbl1
Control-vs-T2DM	FB_Cluster_9	ENSMUSG00000009035	Tmem184b	0.478625054	1.109440645	46	78	0.087	0.256	1.212693301	0.033557882	1	up	Tmem184b
Control-vs-T2DM	FB_Cluster_9	ENSMUSG00000025289	Prdx4	0.503980382	1.237568477	46	78	0.109	0.295	1.295899212	0.034600263	1	up	Prdx4
Control-vs-T2DM	FB_Cluster_9	ENSMUSG00000024018	Ccdc167	0.152984732	0.583452334	46	78	0.022	0.141	1.930531643	0.034911434	1	up	Ccdc167
Control-vs-T2DM	FB_Cluster_9	ENSMUSG00000020964	Sel1l	1.148539195	1.972572598	46	78	0.217	0.436	0.780225838	0.034961236	1	up	Sel1l
Control-vs-T2DM	FB_Cluster_9	ENSMUSG00000040118	Cacna2d1	2.143512315	3.868198226	46	78	0.326	0.564	0.851655014	0.035519746	1	up	Cacna2d1
Control-vs-T2DM	FB_Cluster_9	ENSMUSG00000026083	Eif5b	0.395940354	1.41863293	46	78	0.087	0.269	1.840883688	0.035545928	1	up	Eif5b
Control-vs-T2DM	FB_Cluster_9	ENSMUSG00000053931	Cnn3	0.149718529	0.575036176	46	78	0.022	0.141	1.940687521	0.036321775	1	up	Cnn3
Control-vs-T2DM	FB_Cluster_9	ENSMUSG00000063268	Parp10	0.087675461	0.543243836	46	78	0.022	0.154	2.62997588	0.036334617	1	up	Parp10
Control-vs-T2DM	FB_Cluster_9	ENSMUSG00000019861	Gopc	0.29441856	0.565092064	46	78	0.022	0.115	0.940382654	0.036441513	1	up	Gopc
Control-vs-T2DM	FB_Cluster_9	ENSMUSG00000035692	Isg15	0.342550824	1.875476773	46	78	0.087	0.256	2.452523258	0.037241168	1	up	Isg15
Control-vs-T2DM	FB_Cluster_9	ENSMUSG00000040128	Pnrc1	0.419401098	1.049481791	46	78	0.109	0.295	1.323068103	0.038127153	1	up	Pnrc1
Control-vs-T2DM	FB_Cluster_9	ENSMUSG00000034723	Tmx4	0.236320429	0.75977855	46	78	0.065	0.231	1.684414153	0.038656517	1	up	Tmx4
Control-vs-T2DM	FB_Cluster_9	ENSMUSG00000043067	Dpy19l1	0.544412013	0.889953025	46	78	0.109	0.256	0.708927408	0.039321726	1	up	Dpy19l1
Control-vs-T2DM	FB_Cluster_9	ENSMUSG00000052684	Jun	0.488907524	1.785682666	46	78	0.13	0.308	1.868627942	0.039545305	1	up	Jun
Control-vs-T2DM	FB_Cluster_9	ENSMUSG00000037791	Phf12	0.759315183	1.084985551	46	78	0.13	0.282	0.514848044	0.041661994	1	up	Phf12
Control-vs-T2DM	FB_Cluster_9	ENSMUSG00000039501	Znfx1	0.210987088	0.756222145	46	78	0.065	0.231	1.841162526	0.042069928	1	up	Znfx1
Control-vs-T2DM	FB_Cluster_9	ENSMUSG00000087700	Gm15283	0.236995323	1.050623493	46	78	0.043	0.192	2.147843949	0.042745125	1	up	Gm15283
Control-vs-T2DM	FB_Cluster_9	ENSMUSG00000025159	Mms19	0.029397066	0.500493216	46	78	0.022	0.128	4.084995365	0.042994663	1	up	Mms19
Control-vs-T2DM	FB_Cluster_9	ENSMUSG00000024190	Dusp1	0.199932913	1.015518355	46	78	0.043	0.192	2.344049068	0.043719924	1	up	Dusp1
Control-vs-T2DM	FB_Cluster_9	ENSMUSG00000029563	Foxp2	4.658504961	6.031916366	46	78	0.478	0.692	0.372742344	0.04776256	1	up	Foxp2
Control-vs-T2DM	FB_Cluster_9	ENSMUSG00000019471	Cdc37	0.173196683	0.555166614	46	78	0.043	0.179	1.679936614	0.048503956	1	up	Cdc37
Control-vs-T2DM	FB_Cluster_9	ENSMUSG00000030814	Bcl7c	0.460549224	0.79146776	46	78	0.087	0.218	0.781044272	0.048763624	1	up	Bcl7c
Control-vs-T2DM	FB_Cluster_9	ENSMUSG00000021054	Sgpp1	0.099904092	0.485070213	46	78	0.022	0.141	2.278431943	0.049293886	1	up	Sgpp1
Control-vs-T2DM	FB_Cluster_9	ENSMUSG00000039646	Vasn	0.435512297	0.833753003	46	78	0.087	0.231	0.936748398	0.049416527	1	up	Vasn
Control-vs-T2DM	FB_Cluster_0	ENSMUSG00000001891	Ugp2	2.24824133	1.544225917	1078	775	0.352	0.335	-0.54188382	9.18E-17	2.80E-12	down	Ugp2
Control-vs-T2DM	FB_Cluster_0	ENSMUSG00000040462	Os9	1.80558531	1.341664651	1078	775	0.295	0.299	-0.428414844	2.03E-16	6.20E-12	down	Os9
Control-vs-T2DM	FB_Cluster_0	ENSMUSG00000022403	St13	1.487414658	1.098087002	1078	775	0.258	0.262	-0.437780144	2.37E-15	7.22E-11	down	St13
Control-vs-T2DM	FB_Cluster_0	ENSMUSG00000090266	Mettl23	0.916493598	0.624343632	1078	775	0.163	0.161	-0.553710862	3.86E-14	1.18E-09	down	Mettl23
Control-vs-T2DM	FB_Cluster_0	ENSMUSG00000038633	Degs1	1.323689292	0.90981341	1078	775	0.24	0.222	-0.540872341	1.78E-13	5.44E-09	down	Degs1
Control-vs-T2DM	FB_Cluster_0	ENSMUSG00000032649	Colgalt2	1.619009311	1.238686982	1078	775	0.261	0.276	-0.386272262	2.81E-13	8.58E-09	down	Colgalt2
Control-vs-T2DM	FB_Cluster_0	ENSMUSG00000032328	Tmem30a	1.709247992	1.238593455	1078	775	0.297	0.285	-0.464626932	3.07E-13	9.35E-09	down	Tmem30a
Control-vs-T2DM	FB_Cluster_0	ENSMUSG00000031696	Vps35	0.971976175	0.693509976	1078	775	0.183	0.185	-0.486944723	1.19E-12	3.62E-08	down	Vps35
Control-vs-T2DM	FB_Cluster_0	ENSMUSG00000006932	Ctnnb1	1.057916189	0.814047772	1078	775	0.194	0.201	-0.377999123	1.13E-11	3.45E-07	down	Ctnnb1
Control-vs-T2DM	FB_Cluster_0	ENSMUSG00000021427	Ssr1	1.438378949	1.104336981	1078	775	0.26	0.262	-0.381233008	1.49E-11	4.55E-07	down	Ssr1
Control-vs-T2DM	FB_Cluster_0	ENSMUSG00000032766	Gng11	0.84961759	0.613087918	1078	775	0.149	0.152	-0.470654159	1.65E-11	5.04E-07	down	Gng11
Control-vs-T2DM	FB_Cluster_0	ENSMUSG00000055128	Cgrrf1	0.48988549	0.37938351	1078	775	0.096	0.106	-0.368701833	2.66E-11	8.09E-07	down	Cgrrf1
Control-vs-T2DM	FB_Cluster_0	ENSMUSG00000029502	Golga3	1.120227889	0.831941272	1078	775	0.203	0.205	-0.429194032	4.01E-11	1.22E-06	down	Golga3
Control-vs-T2DM	FB_Cluster_0	ENSMUSG00000030751	Psma1	0.784448336	0.569912243	1078	775	0.147	0.148	-0.460869428	4.56E-11	1.39E-06	down	Psma1
Control-vs-T2DM	FB_Cluster_0	ENSMUSG00000032422	Snx14	0.526130223	0.405625786	1078	775	0.109	0.119	-0.375189114	6.40E-11	1.95E-06	down	Snx14
Control-vs-T2DM	FB_Cluster_0	ENSMUSG00000008859	Rala	0.757937682	0.53508419	1078	775	0.137	0.142	-0.502234069	8.89E-11	2.71E-06	down	Rala
Control-vs-T2DM	FB_Cluster_0	ENSMUSG00000035900	Gramd4	0.702927224	0.510819725	1078	775	0.13	0.133	-0.460483922	1.02E-10	3.10E-06	down	Gramd4
Control-vs-T2DM	FB_Cluster_0	ENSMUSG00000027712	Anxa5	1.585077153	1.088497074	1078	775	0.27	0.248	-0.542174016	1.32E-10	4.02E-06	down	Anxa5
Control-vs-T2DM	FB_Cluster_0	ENSMUSG00000022336	Eif3e	0.607728471	0.471771817	1078	775	0.112	0.124	-0.365269244	2.22E-10	6.77E-06	down	Eif3e
Control-vs-T2DM	FB_Cluster_0	ENSMUSG00000034088	Hdlbp	2.375432097	1.787656049	1078	775	0.385	0.359	-0.410100815	2.24E-10	6.83E-06	down	Hdlbp
Control-vs-T2DM	FB_Cluster_0	ENSMUSG00000026500	Cox20	0.6906014	0.461617114	1078	775	0.126	0.12	-0.58105294	3.99E-10	1.22E-05	down	Cox20
Control-vs-T2DM	FB_Cluster_0	ENSMUSG00000022656	Nectin3	0.816087933	0.600206299	1078	775	0.154	0.154	-0.443202574	5.86E-10	1.79E-05	down	Nectin3
Control-vs-T2DM	FB_Cluster_0	ENSMUSG00000010663	Fads1	0.509188371	0.362279454	1078	775	0.098	0.103	-0.490981613	6.63E-10	2.02E-05	down	Fads1
Control-vs-T2DM	FB_Cluster_0	ENSMUSG00000054204	Alkal2	0.897591114	0.601859855	1078	775	0.144	0.138	-0.576551838	7.49E-10	2.28E-05	down	Alkal2
Control-vs-T2DM	FB_Cluster_0	ENSMUSG00000024053	Emilin2	0.602156488	0.459396681	1078	775	0.117	0.126	-0.390323591	8.66E-10	2.64E-05	down	Emilin2
Control-vs-T2DM	FB_Cluster_0	ENSMUSG00000036427	Gpi1	0.865351891	0.583249378	1078	775	0.17	0.147	-0.569093428	1.24E-09	3.78E-05	down	Gpi1
Control-vs-T2DM	FB_Cluster_0	ENSMUSG00000072115	Ang	0.633041457	0.474820622	1078	775	0.116	0.125	-0.414841462	1.27E-09	3.88E-05	down	Ang
Control-vs-T2DM	FB_Cluster_0	ENSMUSG00000032199	Polr2m	0.735416358	0.424473352	1078	775	0.137	0.11	-0.792743605	1.54E-09	4.70E-05	down	Polr2m
Control-vs-T2DM	FB_Cluster_0	ENSMUSG00000021665	Hexb	1.005503331	0.740292879	1078	775	0.182	0.182	-0.441698408	2.39E-09	7.29E-05	down	Hexb
Control-vs-T2DM	FB_Cluster_0	ENSMUSG00000025132	Arhgdia	0.652929448	0.479704487	1078	775	0.127	0.132	-0.444701402	3.47E-09	0.000105742	down	Arhgdia
Control-vs-T2DM	FB_Cluster_0	ENSMUSG00000059355	Wdr83os	0.575229429	0.331531958	1078	775	0.103	0.088	-0.794805228	3.58E-09	0.000109255	down	Wdr83os
Control-vs-T2DM	FB_Cluster_0	ENSMUSG00000089762	Ier5l	0.522463703	0.403009564	1078	775	0.104	0.112	-0.374434908	3.60E-09	0.000109712	down	Ier5l
Control-vs-T2DM	FB_Cluster_0	ENSMUSG00000031765	Mt1	1.330392596	1.00952445	1078	775	0.219	0.221	-0.398141728	3.92E-09	0.000119519	down	Mt1
Control-vs-T2DM	FB_Cluster_0	ENSMUSG00000022744	Cldnd1	0.638435211	0.463040252	1078	775	0.121	0.125	-0.46331703	4.47E-09	0.000136145	down	Cldnd1
Control-vs-T2DM	FB_Cluster_0	ENSMUSG00000045954	Cavin2	0.741059799	0.557784602	1078	775	0.128	0.134	-0.409817899	5.50E-09	0.000167544	down	Cavin2
Control-vs-T2DM	FB_Cluster_0	ENSMUSG00000040280	Ndufa4l2	0.7009767	0.42910608	1078	775	0.121	0.111	-0.707901776	6.50E-09	0.000198194	down	Ndufa4l2
Control-vs-T2DM	FB_Cluster_0	ENSMUSG00000026111	Unc50	0.700773957	0.444661676	1078	775	0.134	0.115	-0.656122539	8.74E-09	0.000266236	down	Unc50
Control-vs-T2DM	FB_Cluster_0	ENSMUSG00000031534	Smim19	0.630012862	0.409952543	1078	775	0.119	0.11	-0.619801474	1.08E-08	0.000327942	down	Smim19
Control-vs-T2DM	FB_Cluster_0	ENSMUSG00000033701	Acbd6	0.751330622	0.521818036	1078	775	0.138	0.132	-0.525816652	1.17E-08	0.000356405	down	Acbd6
Control-vs-T2DM	FB_Cluster_0	ENSMUSG00000071644	Eef1g	1.003805962	0.697775312	1078	775	0.194	0.173	-0.524582934	1.29E-08	0.000392623	down	Eef1g
Control-vs-T2DM	FB_Cluster_0	ENSMUSG00000060143	Gm10076	1.243243501	0.96486816	1078	775	0.225	0.219	-0.365671683	1.32E-08	0.000401698	down	Gm10076
Control-vs-T2DM	FB_Cluster_0	ENSMUSG00000029038	Ssu72	0.722103173	0.554170667	1078	775	0.123	0.134	-0.3818141	1.53E-08	0.0004673	down	Ssu72
Control-vs-T2DM	FB_Cluster_0	ENSMUSG00000068184	Ndufaf2	0.58634336	0.426641062	1078	775	0.11	0.112	-0.458630838	2.05E-08	0.000626201	down	Ndufaf2
Control-vs-T2DM	FB_Cluster_0	ENSMUSG00000022312	Eif3h	0.88811566	0.618927444	1078	775	0.158	0.148	-0.520906635	2.12E-08	0.000647519	down	Eif3h
Control-vs-T2DM	FB_Cluster_0	ENSMUSG00000029833	Trim24	1.487918963	1.111575196	1078	775	0.24	0.23	-0.420657582	2.18E-08	0.000665891	down	Trim24
Control-vs-T2DM	FB_Cluster_0	ENSMUSG00000020496	Rnf187	0.514239637	0.358314624	1078	775	0.103	0.099	-0.521091834	3.51E-08	0.001068735	down	Rnf187
Control-vs-T2DM	FB_Cluster_0	ENSMUSG00000029413	Naaa	0.548632239	0.325309364	1078	775	0.108	0.089	-0.753846572	3.92E-08	0.00119335	down	Naaa
Control-vs-T2DM	FB_Cluster_0	ENSMUSG00000014905	Dnajb9	0.780726879	0.532734577	1078	775	0.15	0.135	-0.551315012	4.77E-08	0.001452567	down	Dnajb9
Control-vs-T2DM	FB_Cluster_0	ENSMUSG00000022594	Lynx1	0.584828171	0.423961816	1078	775	0.113	0.111	-0.463984888	5.84E-08	0.001781194	down	Lynx1
Control-vs-T2DM	FB_Cluster_0	ENSMUSG00000020519	Sap30l	0.595584623	0.433274907	1078	775	0.122	0.116	-0.458933096	6.86E-08	0.002091666	down	Sap30l
Control-vs-T2DM	FB_Cluster_0	ENSMUSG00000033453	Adamts15	0.681895656	0.356011486	1078	775	0.118	0.089	-0.937433582	1.72E-07	0.005256712	down	Adamts15
Control-vs-T2DM	FB_Cluster_0	ENSMUSG00000024084	Qpct	1.076183782	0.789610765	1078	775	0.187	0.181	-0.44666226	2.10E-07	0.006412685	down	Qpct
Control-vs-T2DM	FB_Cluster_0	ENSMUSG00000019210	Atp6v1e1	0.654165265	0.440259998	1078	775	0.118	0.11	-0.571192257	2.87E-07	0.008754765	down	Atp6v1e1
Control-vs-T2DM	FB_Cluster_0	ENSMUSG00000042312	S100a13	0.687172998	0.486128434	1078	775	0.122	0.117	-0.499249016	3.17E-07	0.009647439	down	S100a13
Control-vs-T2DM	FB_Cluster_0	ENSMUSG00000036781	Rps27l	0.620720972	0.472653629	1078	775	0.115	0.119	-0.393088762	4.29E-07	0.013071989	down	Rps27l
Control-vs-T2DM	FB_Cluster_0	ENSMUSG00000079658	Eloc	0.562435168	0.404307576	1078	775	0.099	0.101	-0.476133267	5.82E-07	0.017732346	down	Eloc
Control-vs-T2DM	FB_Cluster_0	ENSMUSG00000015291	Gdi1	0.4627011	0.359584548	1078	775	0.096	0.101	-0.363660111	8.89E-07	0.027090131	down	Gdi1
Control-vs-T2DM	FB_Cluster_0	ENSMUSG00000000594	Gm2a	0.730881938	0.565263203	1078	775	0.138	0.141	-0.370657771	1.28E-06	0.038888786	down	Gm2a
Control-vs-T2DM	FB_Cluster_0	ENSMUSG00000025940	Tmem70	0.543795627	0.320585946	1078	775	0.107	0.084	-0.762168697	2.15E-06	0.065566774	down	Tmem70
Control-vs-T2DM	FB_Cluster_0	ENSMUSG00000022601	Zbtb11	0.606633712	0.454373392	1078	775	0.107	0.108	-0.416867644	2.49E-06	0.075938211	down	Zbtb11
Control-vs-T2DM	FB_Cluster_0	ENSMUSG00000019054	Fis1	0.616351882	0.448751803	1078	775	0.119	0.111	-0.457749098	2.90E-06	0.088341597	down	Fis1
Control-vs-T2DM	FB_Cluster_0	ENSMUSG00000029152	Ociad1	0.832131087	0.625674234	1078	775	0.161	0.152	-0.41134192	3.21E-06	0.097759394	down	Ociad1
Control-vs-T2DM	FB_Cluster_0	ENSMUSG00000025534	Gusb	0.553564476	0.429929318	1078	775	0.108	0.111	-0.364576938	4.37E-06	0.133315535	down	Gusb
Control-vs-T2DM	FB_Cluster_0	ENSMUSG00000020676	Ccl11	1.646147881	1.094785878	1078	775	0.156	0.151	-0.588401081	9.10E-06	0.27734524	down	Ccl11
Control-vs-T2DM	FB_Cluster_0	ENSMUSG00000020257	Wdr82	0.566185169	0.408780483	1078	775	0.11	0.102	-0.469849545	1.02E-05	0.309668348	down	Wdr82
Control-vs-T2DM	FB_Cluster_0	ENSMUSG00000006299	Aamp	0.504490807	0.373334059	1078	775	0.101	0.099	-0.434260408	1.46E-05	0.444068935	down	Aamp
Control-vs-T2DM	FB_Cluster_0	ENSMUSG00000032932	Hspa13	0.522389607	0.351476753	1078	775	0.104	0.092	-0.571562658	1.51E-05	0.461327811	down	Hspa13
Control-vs-T2DM	FB_Cluster_0	ENSMUSG00000085091	Egfros	1.186264631	0.903415319	1078	775	0.19	0.186	-0.392926526	1.84E-05	0.562149836	down	Egfros
Control-vs-T2DM	FB_Cluster_0	ENSMUSG00000063856	Gpx1	0.647426814	0.503671615	1078	775	0.123	0.12	-0.3621701	2.69E-05	0.819781307	down	Gpx1
Control-vs-T2DM	FB_Cluster_0	ENSMUSG00000022808	Snx4	0.640100833	0.496873451	1078	775	0.122	0.121	-0.365355771	3.45E-05	1	down	Snx4
Control-vs-T2DM	FB_Cluster_0	ENSMUSG00000014177	Tvp23b	0.519149802	0.382554792	1078	775	0.103	0.098	-0.440385295	3.70E-05	1	down	Tvp23b
Control-vs-T2DM	FB_Cluster_0	ENSMUSG00000030814	Bcl7c	0.574288959	0.387232071	1078	775	0.112	0.095	-0.568457054	4.04E-05	1	down	Bcl7c
Control-vs-T2DM	FB_Cluster_0	ENSMUSG00000026755	Arpc5l	0.602364392	0.385806546	1078	775	0.12	0.095	-0.642624459	4.90E-05	1	down	Arpc5l
Control-vs-T2DM	FB_Cluster_0	ENSMUSG00000029405	G3bp2	0.55774043	0.404748751	1078	775	0.11	0.099	-0.462469469	0.000336928	1	down	G3bp2
Control-vs-T2DM	FB_Cluster_0	ENSMUSG00000044408	Sptssa	0.514187766	0.373362997	1078	775	0.101	0.092	-0.461610526	0.000396122	1	down	Sptssa
Control-vs-T2DM	FB_Cluster_0	ENSMUSG00000043613	Mmp3	2.389230177	1.545856172	1078	775	0.119	0.111	-0.628106812	0.017299136	1	down	Mmp3
Control-vs-T2DM	FB_Cluster_0	ENSMUSG00000027996	Sfrp2	0.73700463	0.483409803	1078	775	0.105	0.08	-0.608324282	0.025915112	1	down	Sfrp2
Control-vs-T2DM	FB_Cluster_1	ENSMUSG00000019916	P4ha1	3.85120152	2.739844384	874	902	0.479	0.452	-0.491199467	4.01E-16	1.22E-11	down	P4ha1
Control-vs-T2DM	FB_Cluster_1	ENSMUSG00000005621	Zfp592	1.749650582	1.355307116	874	902	0.246	0.269	-0.368423037	6.36E-14	1.94E-09	down	Zfp592
Control-vs-T2DM	FB_Cluster_1	ENSMUSG00000060743	H3f3a	2.277406273	1.761310989	874	902	0.317	0.325	-0.370723455	7.80E-14	2.38E-09	down	H3f3a
Control-vs-T2DM	FB_Cluster_1	ENSMUSG00000032314	Etfa	2.843010064	2.096996241	874	902	0.363	0.353	-0.439076878	2.46E-13	7.50E-09	down	Etfa
Control-vs-T2DM	FB_Cluster_1	ENSMUSG00000021500	Ddx46	1.509406928	1.146319059	874	902	0.22	0.227	-0.396942878	2.79E-13	8.51E-09	down	Ddx46
Control-vs-T2DM	FB_Cluster_1	ENSMUSG00000020571	Pdia6	2.693895294	1.691269777	874	902	0.357	0.287	-0.671555227	6.90E-13	2.10E-08	down	Pdia6
Control-vs-T2DM	FB_Cluster_1	ENSMUSG00000025241	Fyco1	1.116197983	0.863503241	874	902	0.17	0.185	-0.370281627	2.19E-12	6.69E-08	down	Fyco1
Control-vs-T2DM	FB_Cluster_1	ENSMUSG00000075702	Selenom	1.923088691	1.289097207	874	902	0.275	0.248	-0.577027349	2.33E-12	7.09E-08	down	Selenom
Control-vs-T2DM	FB_Cluster_1	ENSMUSG00000025362	Rps26	2.790140943	1.871102778	874	902	0.372	0.309	-0.576423799	4.40E-12	1.34E-07	down	Rps26
Control-vs-T2DM	FB_Cluster_1	ENSMUSG00000029614	Rpl6	2.884753084	2.156870836	874	902	0.378	0.356	-0.419491179	6.41E-12	1.95E-07	down	Rpl6
Control-vs-T2DM	FB_Cluster_1	ENSMUSG00000028822	Tmem50a	1.805402112	1.336953643	874	902	0.262	0.261	-0.433342759	1.37E-11	4.18E-07	down	Tmem50a
Control-vs-T2DM	FB_Cluster_1	ENSMUSG00000052146	Rps10	1.970792859	1.261128974	874	902	0.288	0.233	-0.644019133	1.88E-11	5.74E-07	down	Rps10
Control-vs-T2DM	FB_Cluster_1	ENSMUSG00000029571	Tmem106b	0.978251422	0.72660156	874	902	0.151	0.157	-0.428989768	2.47E-11	7.52E-07	down	Tmem106b
Control-vs-T2DM	FB_Cluster_1	ENSMUSG00000058600	Rpl30	3.843138929	2.763477221	874	902	0.465	0.416	-0.475785744	7.67E-11	2.34E-06	down	Rpl30
Control-vs-T2DM	FB_Cluster_1	ENSMUSG00000034235	Usp54	0.706378696	0.531869229	874	902	0.105	0.118	-0.40930326	1.46E-10	4.44E-06	down	Usp54
Control-vs-T2DM	FB_Cluster_1	ENSMUSG00000020440	Arf5	1.512410533	0.99082102	874	902	0.228	0.193	-0.61010321	2.04E-10	6.23E-06	down	Arf5
Control-vs-T2DM	FB_Cluster_1	ENSMUSG00000068220	Lgals1	2.177449001	1.504945783	874	902	0.303	0.268	-0.53289781	7.24E-10	2.21E-05	down	Lgals1
Control-vs-T2DM	FB_Cluster_1	ENSMUSG00000041203	Trir	0.675038886	0.382334697	874	902	0.114	0.094	-0.819970896	1.14E-09	3.46E-05	down	Trir
Control-vs-T2DM	FB_Cluster_1	ENSMUSG00000052684	Jun	1.116673987	0.685109067	874	902	0.153	0.132	-0.704721095	1.29E-09	3.92E-05	down	Jun
Control-vs-T2DM	FB_Cluster_1	ENSMUSG00000048076	Arf1	1.476002136	1.092806743	874	902	0.236	0.225	-0.433622248	1.47E-09	4.48E-05	down	Arf1
Control-vs-T2DM	FB_Cluster_1	ENSMUSG00000037058	Paip2	1.860275086	1.385766238	874	902	0.264	0.252	-0.424805507	2.32E-09	7.08E-05	down	Paip2
Control-vs-T2DM	FB_Cluster_1	ENSMUSG00000028465	Tln1	1.21724995	0.937524917	874	902	0.191	0.191	-0.376661144	2.97E-09	9.07E-05	down	Tln1
Control-vs-T2DM	FB_Cluster_1	ENSMUSG00000019373	Cops3	0.681295062	0.487951134	874	902	0.11	0.112	-0.481459185	3.90E-09	0.000118951	down	Cops3
Control-vs-T2DM	FB_Cluster_1	ENSMUSG00000072941	Sod3	0.736136731	0.506613461	874	902	0.119	0.114	-0.538999574	7.26E-09	0.000221346	down	Sod3
Control-vs-T2DM	FB_Cluster_1	ENSMUSG00000032966	Fkbp1a	1.101659635	0.739797818	874	902	0.17	0.152	-0.574411563	9.68E-09	0.000294903	down	Fkbp1a
Control-vs-T2DM	FB_Cluster_1	ENSMUSG00000001924	Uba1	0.587590791	0.433381499	874	902	0.098	0.102	-0.43908687	1.17E-08	0.000355614	down	Uba1
Control-vs-T2DM	FB_Cluster_1	ENSMUSG00000062997	Rpl35	1.559052496	1.193498168	874	902	0.224	0.221	-0.385444814	1.18E-08	0.000359331	down	Rpl35
Control-vs-T2DM	FB_Cluster_1	ENSMUSG00000032557	Uba5	1.167821302	0.885347308	874	902	0.177	0.177	-0.399464703	1.35E-08	0.000410502	down	Uba5
Control-vs-T2DM	FB_Cluster_1	ENSMUSG00000029675	Eln	5.399860719	4.142398727	874	902	0.449	0.467	-0.382447659	2.22E-08	0.000677911	down	Eln
Control-vs-T2DM	FB_Cluster_1	ENSMUSG00000046402	Rbp1	1.219563926	0.91602261	874	902	0.193	0.188	-0.412871071	2.43E-08	0.000740128	down	Rbp1
Control-vs-T2DM	FB_Cluster_1	ENSMUSG00000074748	Atxn7l3b	0.911231407	0.700150425	874	902	0.145	0.149	-0.380104834	2.72E-08	0.000827661	down	Atxn7l3b
Control-vs-T2DM	FB_Cluster_1	ENSMUSG00000054364	Rhob	0.907392666	0.635973748	874	902	0.148	0.14	-0.512691939	3.17E-08	0.0009668	down	Rhob
Control-vs-T2DM	FB_Cluster_1	ENSMUSG00000040128	Pnrc1	1.244081356	0.870266756	874	902	0.184	0.165	-0.515501435	3.23E-08	0.000984285	down	Pnrc1
Control-vs-T2DM	FB_Cluster_1	ENSMUSG00000041133	Smc1a	1.844299498	1.426299461	874	902	0.262	0.253	-0.370773116	3.69E-08	0.001123875	down	Smc1a
Control-vs-T2DM	FB_Cluster_1	ENSMUSG00000037892	Pcdh18	0.718159645	0.491765663	874	902	0.102	0.11	-0.546241116	3.71E-08	0.001131922	down	Pcdh18
Control-vs-T2DM	FB_Cluster_1	ENSMUSG00000028600	Podn	0.868346614	0.655255725	874	902	0.133	0.139	-0.406158954	5.63E-08	0.001717069	down	Podn
Control-vs-T2DM	FB_Cluster_1	ENSMUSG00000019471	Cdc37	0.749126122	0.514011562	874	902	0.111	0.11	-0.543319742	5.65E-08	0.001721751	down	Cdc37
Control-vs-T2DM	FB_Cluster_1	ENSMUSG00000034932	Mrpl54	0.742093618	0.264689911	874	902	0.116	0.053	-1.486947443	5.81E-08	0.001771004	down	Mrpl54
Control-vs-T2DM	FB_Cluster_1	ENSMUSG00000002064	Sdf2	1.023797478	0.687139434	874	902	0.16	0.144	-0.57518654	5.91E-08	0.001800148	down	Sdf2
Control-vs-T2DM	FB_Cluster_1	ENSMUSG00000011114	Tbrg1	1.084236034	0.782531828	874	902	0.157	0.156	-0.470406227	6.38E-08	0.001943633	down	Tbrg1
Control-vs-T2DM	FB_Cluster_1	ENSMUSG00000021248	Tmed10	2.563724882	1.952841343	874	902	0.341	0.318	-0.392649106	7.71E-08	0.002348409	down	Tmed10
Control-vs-T2DM	FB_Cluster_1	ENSMUSG00000017428	Psmd11	0.977928929	0.756322123	874	902	0.168	0.164	-0.370685582	9.37E-08	0.002855704	down	Psmd11
Control-vs-T2DM	FB_Cluster_1	ENSMUSG00000011958	Bnip2	0.880713777	0.543018567	874	902	0.146	0.119	-0.697569851	1.10E-07	0.003353312	down	Bnip2
Control-vs-T2DM	FB_Cluster_1	ENSMUSG00000045210	Vcpip1	0.604487633	0.426462414	874	902	0.101	0.096	-0.503194617	2.47E-07	0.007540899	down	Vcpip1
Control-vs-T2DM	FB_Cluster_1	ENSMUSG00000060591	Ifitm2	3.445005475	2.631627106	874	902	0.427	0.397	-0.388538255	2.48E-07	0.007554814	down	Ifitm2
Control-vs-T2DM	FB_Cluster_1	ENSMUSG00000020088	Sar1a	1.111654788	0.81182959	874	902	0.184	0.17	-0.453412089	2.87E-07	0.008755459	down	Sar1a
Control-vs-T2DM	FB_Cluster_1	ENSMUSG00000025130	P4hb	1.914596555	1.42868621	874	902	0.288	0.254	-0.422325708	3.01E-07	0.0091893	down	P4hb
Control-vs-T2DM	FB_Cluster_1	ENSMUSG00000031198	Fundc2	0.981113615	0.633292122	874	902	0.154	0.127	-0.631468329	3.15E-07	0.009607721	down	Fundc2
Control-vs-T2DM	FB_Cluster_1	ENSMUSG00000024098	Twsg1	0.704482498	0.535156367	874	902	0.116	0.119	-0.396538585	6.21E-07	0.018933891	down	Twsg1
Control-vs-T2DM	FB_Cluster_1	ENSMUSG00000044337	Ackr3	2.200856605	1.546529931	874	902	0.253	0.231	-0.509002663	7.44E-07	0.022683003	down	Ackr3
Control-vs-T2DM	FB_Cluster_1	ENSMUSG00000022505	Emp2	0.756248098	0.506346192	874	902	0.126	0.113	-0.578641371	7.71E-07	0.023509436	down	Emp2
Control-vs-T2DM	FB_Cluster_1	ENSMUSG00000031232	Magt1	1.139501423	0.722297662	874	902	0.17	0.14	-0.6576642	1.42E-06	0.043222696	down	Magt1
Control-vs-T2DM	FB_Cluster_1	ENSMUSG00000033059	Pygb	0.9690137	0.672947542	874	902	0.151	0.134	-0.525957521	1.65E-06	0.050156099	down	Pygb
Control-vs-T2DM	FB_Cluster_1	ENSMUSG00000021072	Tmx1	0.674592332	0.503264918	874	902	0.11	0.113	-0.422625093	2.56E-06	0.078027617	down	Tmx1
Control-vs-T2DM	FB_Cluster_1	ENSMUSG00000024726	Carnmt1	0.661232158	0.473881107	874	902	0.109	0.103	-0.480545501	2.93E-06	0.089176423	down	Carnmt1
Control-vs-T2DM	FB_Cluster_1	ENSMUSG00000053565	Eif3k	0.751387972	0.496187695	874	902	0.121	0.104	-0.59857333	3.34E-06	0.101692805	down	Eif3k
Control-vs-T2DM	FB_Cluster_1	ENSMUSG00000029836	Cbx3	1.257656947	0.975715362	874	902	0.182	0.18	-0.366173058	4.09E-06	0.124715455	down	Cbx3
Control-vs-T2DM	FB_Cluster_1	ENSMUSG00000066026	Dhrs3	0.655730445	0.313694463	874	902	0.112	0.069	-1.06350298	8.07E-06	0.245913438	down	Dhrs3
Control-vs-T2DM	FB_Cluster_1	ENSMUSG00000039457	Ppl	0.99350362	0.593242938	874	902	0.154	0.115	-0.743804241	9.55E-06	0.291180056	down	Ppl
Control-vs-T2DM	FB_Cluster_1	ENSMUSG00000073702	Rpl31	1.320940869	0.955721813	874	902	0.206	0.183	-0.466861503	1.13E-05	0.345170647	down	Rpl31
Control-vs-T2DM	FB_Cluster_1	ENSMUSG00000027367	Stard7	0.647458842	0.471750013	874	902	0.108	0.102	-0.456682951	1.29E-05	0.393003028	down	Stard7
Control-vs-T2DM	FB_Cluster_1	ENSMUSG00000027708	Dcun1d1	0.63791548	0.471997974	874	902	0.109	0.105	-0.434505136	1.48E-05	0.451563083	down	Dcun1d1
Control-vs-T2DM	FB_Cluster_1	ENSMUSG00000031924	Cyb5b	0.614088645	0.452611303	874	902	0.108	0.104	-0.440090515	1.55E-05	0.472937806	down	Cyb5b
[truncated: 956 more rows]
