# Supplementary material for: Single-cell RNA-seq of heart reveals intercellular communication drivers of myocardial fibrosis in diabetic cardiomyopathy
Source: eLife. 2023 Apr 3;12:e80479. doi: 10.7554/eLife.80479 (PMC10110238; doi:10.7554/eLife.80479)
Supplement: Supplementary file 21. [file elife-80479-supp21.xls]

## Sheet: Sheet1
Supplementary file 21: The cognate ligands of Itgb1
Pair.Name	Ligand.ApprovedSymbol	Ligand.Name	Receptor.ApprovedSymbol	Receptor.Name	DLRP	HPMR	IUPHAR	HPRD	STRING.binding	STRING.experiment	HPMR.Ligand	HPMR.Receptor	PMID.Manual	Pair.Source	Pair.Evidence
ADAM12_ITGB1	ADAM12	ADAM metallopeptidase domain 12	ITGB1	integrin, beta 1 (fibronectin receptor, beta polypeptide, antigen CD29 includes MDF2, MSK12)		HPMR			STRING.binding		ADAM12	ITGB1		known	literature supported
ADAM15_ITGB1	ADAM15	ADAM metallopeptidase domain 15	ITGB1	integrin, beta 1 (fibronectin receptor, beta polypeptide, antigen CD29 includes MDF2, MSK12)		HPMR			STRING.binding		ADAM15	ITGB1		known	literature supported
ADAM17_ITGB1	ADAM17	ADAM metallopeptidase domain 17	ITGB1	integrin, beta 1 (fibronectin receptor, beta polypeptide, antigen CD29 includes MDF2, MSK12)		HPMR					ADAM17	ITGB1		known	literature supported
ADAM2_ITGB1	ADAM2	ADAM metallopeptidase domain 2	ITGB1	integrin, beta 1 (fibronectin receptor, beta polypeptide, antigen CD29 includes MDF2, MSK12)		HPMR			STRING.binding		ADAM2	ITGB1		known	literature supported
ADAM9_ITGB1	ADAM9	ADAM metallopeptidase domain 9	ITGB1	integrin, beta 1 (fibronectin receptor, beta polypeptide, antigen CD29 includes MDF2, MSK12)		HPMR					ADAM9	ITGB1		known	literature supported
CD14_ITGB1	CD14	CD14 molecule	ITGB1	integrin, beta 1 (fibronectin receptor, beta polypeptide, antigen CD29 includes MDF2, MSK12)									17274987	novel	literature supported
CHAD_ITGB1	CHAD	chondroadherin	ITGB1	integrin, beta 1 (fibronectin receptor, beta polypeptide, antigen CD29 includes MDF2, MSK12)		HPMR					CHAD	ITGB1		known	literature supported
COL18A1_ITGB1	COL18A1	collagen, type XVIII, alpha 1	ITGB1	integrin, beta 1 (fibronectin receptor, beta polypeptide, antigen CD29 includes MDF2, MSK12)		HPMR			STRING.binding		COL18A1	ITGB1		known	literature supported
COL1A1_ITGB1	COL1A1	collagen, type I, alpha 1	ITGB1	integrin, beta 1 (fibronectin receptor, beta polypeptide, antigen CD29 includes MDF2, MSK12)		HPMR			STRING.binding		COL1A1	ITGB1		known	literature supported
COL2A1_ITGB1	COL2A1	collagen, type II, alpha 1	ITGB1	integrin, beta 1 (fibronectin receptor, beta polypeptide, antigen CD29 includes MDF2, MSK12)		HPMR			STRING.binding		COL2A1	ITGB1		known	literature supported
COL4A1_ITGB1	COL4A1	collagen, type IV, alpha 1	ITGB1	integrin, beta 1 (fibronectin receptor, beta polypeptide, antigen CD29 includes MDF2, MSK12)		HPMR			STRING.binding		COL4A1	ITGB1		known	literature supported
CXCL12_ITGB1	CXCL12	chemokine (C-X-C motif) ligand 12	ITGB1	integrin, beta 1 (fibronectin receptor, beta polypeptide, antigen CD29 includes MDF2, MSK12)									18448868	novel	literature supported
F13A1_ITGB1	F13A1	coagulation factor XIII, A1 polypeptide	ITGB1	integrin, beta 1 (fibronectin receptor, beta polypeptide, antigen CD29 includes MDF2, MSK12)					STRING.binding		F13A1	ITGB1	10816592	novel	literature supported
FBLN1_ITGB1	FBLN1	fibulin 1	ITGB1	integrin, beta 1 (fibronectin receptor, beta polypeptide, antigen CD29 includes MDF2, MSK12)				HPRD				ITGB1		novel	literature supported
FBN1_ITGB1	FBN1	fibrillin 1	ITGB1	integrin, beta 1 (fibronectin receptor, beta polypeptide, antigen CD29 includes MDF2, MSK12)					STRING.binding			ITGB1	20686071	novel	literature supported
FGA_ITGB1	FGA	fibrinogen alpha chain	ITGB1	integrin, beta 1 (fibronectin receptor, beta polypeptide, antigen CD29 includes MDF2, MSK12)					STRING.binding		FGA	ITGB1	15031111	novel	literature supported
FGB_ITGB1	FGB	fibrinogen beta chain	ITGB1	integrin, beta 1 (fibronectin receptor, beta polypeptide, antigen CD29 includes MDF2, MSK12)									15031111	novel	literature supported
FGG_ITGB1	FGG	fibrinogen gamma chain	ITGB1	integrin, beta 1 (fibronectin receptor, beta polypeptide, antigen CD29 includes MDF2, MSK12)									15031111	novel	literature supported
FN1_ITGB1	FN1	fibronectin 1	ITGB1	integrin, beta 1 (fibronectin receptor, beta polypeptide, antigen CD29 includes MDF2, MSK12)		HPMR		HPRD	STRING.binding	STRING.experiment	FN1	ITGB1		known	literature supported
HSPG2_ITGB1	HSPG2	heparan sulfate proteoglycan 2	ITGB1	integrin, beta 1 (fibronectin receptor, beta polypeptide, antigen CD29 includes MDF2, MSK12)				HPRD			HSPG2	ITGB1		novel	literature supported
ICAM4_ITGB1	ICAM4	intercellular adhesion molecule 4 (Landsteiner-Wiener blood group)	ITGB1	integrin, beta 1 (fibronectin receptor, beta polypeptide, antigen CD29 includes MDF2, MSK12)				HPRD			ICAM4	ITGB1		novel	literature supported
LAMA1_ITGB1	LAMA1	laminin, alpha 1	ITGB1	integrin, beta 1 (fibronectin receptor, beta polypeptide, antigen CD29 includes MDF2, MSK12)		HPMR		HPRD	STRING.binding		LAMA1	ITGB1		known	literature supported
LAMA2_ITGB1	LAMA2	laminin, alpha 2	ITGB1	integrin, beta 1 (fibronectin receptor, beta polypeptide, antigen CD29 includes MDF2, MSK12)		HPMR			STRING.binding		LAMA2	ITGB1		known	literature supported
LAMB1_ITGB1	LAMB1	laminin, beta 1	ITGB1	integrin, beta 1 (fibronectin receptor, beta polypeptide, antigen CD29 includes MDF2, MSK12)		HPMR			STRING.binding		LAMB1	ITGB1		known	literature supported
LAMC2_ITGB1	LAMC2	laminin, gamma 2	ITGB1	integrin, beta 1 (fibronectin receptor, beta polypeptide, antigen CD29 includes MDF2, MSK12)		HPMR			STRING.binding		LAMC2	ITGB1		known	literature supported
LGALS3BP_ITGB1	LGALS3BP	lectin, galactoside-binding, soluble, 3 binding protein	ITGB1	integrin, beta 1 (fibronectin receptor, beta polypeptide, antigen CD29 includes MDF2, MSK12)				HPRD				ITGB1		novel	literature supported
MATN1_ITGB1	MATN1	matrilin 1, cartilage matrix protein	ITGB1	integrin, beta 1 (fibronectin receptor, beta polypeptide, antigen CD29 includes MDF2, MSK12)									10196235	novel	literature supported
NPNT_ITGB1	NPNT	nephronectin	ITGB1	integrin, beta 1 (fibronectin receptor, beta polypeptide, antigen CD29 includes MDF2, MSK12)		HPMR			STRING.binding		NPNT	ITGB1		known	literature supported
PLG_ITGB1	PLG	plasminogen	ITGB1	integrin, beta 1 (fibronectin receptor, beta polypeptide, antigen CD29 includes MDF2, MSK12)		HPMR					PLG	ITGB1		known	literature supported
RELN_ITGB1	RELN	reelin	ITGB1	integrin, beta 1 (fibronectin receptor, beta polypeptide, antigen CD29 includes MDF2, MSK12)		HPMR					RELN	ITGB1		known	literature supported
SEMA7A_ITGB1	SEMA7A	semaphorin 7A, GPI membrane anchor (John Milton Hagen blood group)	ITGB1	integrin, beta 1 (fibronectin receptor, beta polypeptide, antigen CD29 includes MDF2, MSK12)					STRING.binding		SEMA7A	ITGB1	7377534	novel	literature supported
SPP1_ITGB1	SPP1	secreted phosphoprotein 1	ITGB1	integrin, beta 1 (fibronectin receptor, beta polypeptide, antigen CD29 includes MDF2, MSK12)				HPRD			SPP1	ITGB1		novel	literature supported
TGM2_ITGB1	TGM2	transglutaminase 2	ITGB1	integrin, beta 1 (fibronectin receptor, beta polypeptide, antigen CD29 includes MDF2, MSK12)				HPRD	STRING.binding		TGM2	ITGB1		novel	literature supported
THBS1_ITGB1	THBS1	thrombospondin 1	ITGB1	integrin, beta 1 (fibronectin receptor, beta polypeptide, antigen CD29 includes MDF2, MSK12)					STRING.binding		THBS1	ITGB1	15292271	novel	literature supported
THBS2_ITGB1	THBS2	thrombospondin 2	ITGB1	integrin, beta 1 (fibronectin receptor, beta polypeptide, antigen CD29 includes MDF2, MSK12)					STRING.binding		THBS2	ITGB1	15292271	novel	literature supported
TIMP2_ITGB1	TIMP2	TIMP metallopeptidase inhibitor 2	ITGB1	integrin, beta 1 (fibronectin receptor, beta polypeptide, antigen CD29 includes MDF2, MSK12)				HPRD				ITGB1		novel	literature supported
TNC_ITGB1	TNC	tenascin C	ITGB1	integrin, beta 1 (fibronectin receptor, beta polypeptide, antigen CD29 includes MDF2, MSK12)					STRING.binding			ITGB1	14715956	novel	literature supported
VCAM1_ITGB1	VCAM1	vascular cell adhesion molecule 1	ITGB1	integrin, beta 1 (fibronectin receptor, beta polypeptide, antigen CD29 includes MDF2, MSK12)		HPMR		HPRD	STRING.binding		VCAM1	ITGB1		known	literature supported
VCAN_ITGB1	VCAN	versican	ITGB1	integrin, beta 1 (fibronectin receptor, beta polypeptide, antigen CD29 includes MDF2, MSK12)				HPRD				ITGB1		novel	literature supported
